# Supplementary material
Source: PubMed Central journal article supplement (PMC3924586)
Supplement: NIHMS550942-supplement-supplementary_data_STM_3005893.pdf [file NIHMS550942-supplement-supplementary_data_STM_3005893.pdf]

# An integrated clinico-metabolomic model improves prediction of death in sepsis

## Supplemental Material

### Table of Contents

|                             |             |            |
|-----------------------------|-------------|------------|
| <b>Material and Methods</b> | <b>Page</b> | <b>2</b>   |
| <b>Figure S1</b>            | <b>Page</b> | <b>9</b>   |
| <b>Figure S2</b>            | <b>Page</b> | <b>10</b>  |
| <b>Figure S3</b>            | <b>Page</b> | <b>10</b>  |
| <b>Figure S4</b>            | <b>Page</b> | <b>11</b>  |
| <b>Figure S5</b>            | <b>Page</b> | <b>12</b>  |
| <b>Figure S6</b>            | <b>Page</b> | <b>14</b>  |
| <b>Figure S7</b>            | <b>Page</b> | <b>15</b>  |
| <b>Figure S8</b>            | <b>Page</b> | <b>16</b>  |
| <b>Figure S9</b>            | <b>Page</b> | <b>17</b>  |
| <b>Figure S10</b>           | <b>Page</b> | <b>18</b>  |
| <b>Figure S11</b>           | <b>Page</b> | <b>19</b>  |
| <b>Figure S12</b>           | <b>Page</b> | <b>20</b>  |
| <b>Figure S13</b>           | <b>Page</b> | <b>21</b>  |
| <b>Figure S14</b>           | <b>Page</b> | <b>22</b>  |
| <b>Figure S15</b>           | <b>Page</b> | <b>23</b>  |
| <b>Figure S16</b>           | <b>Page</b> | <b>24</b>  |
| <b>Figure S17</b>           | <b>Page</b> | <b>25</b>  |
| <b>Figure S18</b>           | <b>Page</b> | <b>27</b>  |
| <b>Figure S19</b>           | <b>Page</b> | <b>28</b>  |
| <br>                        |             |            |
| <b>Table S1</b>             | <b>Page</b> | <b>29</b>  |
| <b>Table S2</b>             | <b>Page</b> | <b>30</b>  |
| <b>Table S3</b>             | <b>Page</b> | <b>31</b>  |
| <b>Table S4</b>             | <b>Page</b> | <b>42</b>  |
| <b>Table S5</b>             | <b>Page</b> | <b>58</b>  |
| <b>Table S6</b>             | <b>Page</b> | <b>74</b>  |
| <b>Table S7</b>             | <b>Page</b> | <b>74</b>  |
| <b>Table S8</b>             | <b>Page</b> | <b>75</b>  |
| <b>Table S9</b>             | <b>Page</b> | <b>80</b>  |
| <b>Table S10</b>            | <b>Page</b> | <b>85</b>  |
| <b>Table S11</b>            | <b>Page</b> | <b>159</b> |

## Supplemental Materials and Methods

### Patient Selection and Clinical Data Collection

The CAPSOD study was approved by the Institutional Review Boards of the National Center for Genome Resources, Duke University Medical Center, Durham Veterans Affairs Medical Center and Henry Ford Health Systems and filed at ClinicalTrials.gov (NCT00258869). Inclusion criteria were presentation of adults at the ED with known or suspected acute infection and presence of at least two SIRS criteria (tympanic temperature  $<36^{\circ}\text{C}$  or  $>38^{\circ}\text{C}$ , tachycardia  $>90$  beats per minute, tachypnea  $>20$  breaths per minute or  $\text{PaCO}_2 <32$  mmHg, white cell count  $<4000$  cells/ $\text{mm}^3$  or  $>12,000$  cells/ $\text{mm}^3$  or  $>10\%$  neutrophil band forms)(12, 17, 25). Exclusion criteria were as previously described (12, 17, 25). Patients were enrolled from 2005 through 2009 and written informed consent was obtained by all study participants or their legal designates.

Patient demographics, past medical history, physical examination, APACHE II, SOFA, development of ALI or ARDS and treatment were recorded at  $t_0$  and  $t_{24}$  using online electronic data capture (Prosanos Inc., Harrisburg, PA) as described (11, 12, 17, 25, 89). Microbiologic evaluation was as clinically indicated and supplemented by SeptiFast testing (25). Finger-stick lactate values were obtained. After 28 days, charts were reviewed and largest deviations of clinical and laboratory parameters from normal were recorded, together with outcome measures (development of severe sepsis, septic shock and death (90)), microbiologic results, treatment and time-to-events. Blood for metabolomic and proteomic analyses was collected in bar-coded EDTA-plasma tubes at enrollment ( $t_0$ ) and the following day ( $t_{24}$ ), incubated on ice, plasma separated (within 4 hours), and aliquots stored at  $-80^{\circ}\text{C}$ .

All subject records were adjudicated independently after day 28 by a physician with critical care training to determine whether presenting symptoms and signs were due to infection, etiologic agent, site of infection, patient outcomes and times-to-outcomes. Patients were clinically categorized based on infection likelihood and microbial etiology(12, 25): definite infection, causative organism identified; definite infection, causative organism uncertain; indeterminate, infection possible; no evidence of infection; and no evidence of infection and diagnosis of a non-infectious process accounting for SIRS. Criteria used to guide these adjudications are presented in Table S1. A second physician

with infectious diseases training independently adjudicated a 10% sample. Agreement regarding infection classification was high with a  $\kappa$  of 0.82 (12). 150 patients were selected from the definite infection and non-infection categories for plasma metabolome and proteome analyses as follows: non-infected patients with  $\geq 2$  SIRS criteria (n=29); uncomplicated sepsis (sepsis without progression and with survival at day 28; n=27); severe sepsis (sepsis at  $t_0$  with progression to severe sepsis by day 3, n=25); septic shock (sepsis at  $t_0$  with progression to septic shock by day 3, n=38); sepsis nonsurvivors (sepsis with death by day 28, n=31). Patients with sepsis were further selected to enrich for confirmed infections due to *E. coli*, *S. aureus*, and *S. pneumoniae*. Within these constraints, groups were matched for age, race, sex and enrollment site. Validation studies employed in an independent CAPSOD sample of 18 sepsis nonsurvivors and 34 matched sepsis survivors (at  $t_0$  [V $t_0$ ] and  $t_{24}$  [V $t_{24}$ ]). The validation set included all remaining sepsis nonsurvivors in CAPSOD at time of selection, and, as a result differed in median time-to-death from the discovery cohort (18.5 days vs. 10.7 days, respectively). eGFR was calculated using the four variable modification of diet in renal disease calculation (91).

### **Metabolite Sample Preparation and Gas Chromatography/Mass-Spectrometry and Liquid Chromatography/Mass-Spectrometry Analysis**

Methanol extraction of small molecules was carried out as described previously (78, 79) using 100 $\mu$ L plasma. A well-characterized pool of human plasma (“Matrix”, MTRX) was prepared in parallel and included as a technical replicate to assess variability and sensitivity in measurements, as described (78, 92). The resulting extract was divided into four fractions: one for analysis by ultra-high performance liquid chromatography-tandem mass spectrometry (UPLC-MS/MS; positive mode), one for analysis by UPLC-MS/MS (negative mode), one for analysis by gas chromatography–mass spectrometry (GC-MS), and one sample was reserved for backup.

Non-targeted UPLC-MS/MS and GC-MS analyses were performed at Metabolon, Inc. as described (78-80). The UPLC-MS/MS platform utilized a Waters Acquity UPLC with Waters UPLC BEH C18-2.1 $\times$ 100 mm, 1.7  $\mu$ m columns and a ThermoFisher LTQ mass spectrometer, which included an electrospray ionization source and a linear ion-trap mass analyzer. The instrumentation was set to monitor for positive ions in acidic extracts or negative ions in basic extracts through independent injections. The instrument was set to scan 99–1000 m/z and alternated between MS and MS/MS scans. Samples destined for analysis by GC-MS were dried under vacuum desiccation for a minimum of 18 hours prior

to being derivatized using bis(trimethylsilyl)trifluoroacetamide. Derivatized samples were separated on a 5% phenyldimethyl silicone column with helium as carrier gas and a temperature ramp from 60° to 340°C within a 17-min period. All samples were analyzed on a Thermo-Finnigan Trace DSQ fast-scanning single-quadrupole MS operated at unit mass resolving power with electron impact ionization and a 50–750 atomic mass unit scan range.

Metabolites were identified by as previously described by Metabolon (81). Identification of known chemical entities was based on comparison to metabolomic library entries of more than 2,400 purified standards. An additional 5,300 mass spectral entries have been created for structurally unnamed biochemicals, which have been identified by virtue of their recurrent nature (both chromatographic and mass spectral). These compounds have the potential to be identified by future acquisition of a matching purified standard or by classical structural analysis. Quantification was performed as described previously.

### **Quantitative LC/MS/MS Measurements**

Combined internal standard working solution was made, comprising: A. butyroylcarnitine-d<sub>3</sub> at 400 ng/mL, 2-methylbutyroylcarnitine-d<sub>3</sub> at 200ng/mL, hexanoylcarnitine-d<sub>3</sub> at 200ng/mL and 4-*cis*-decenoylcarnitine-d<sub>3</sub> (Universidad Autonoma de Madrid, Spain) at 400 ng/mL in acetonitrile/water (1:1); B. uridine-<sup>13</sup>C<sub>5</sub> at 5000 ng/ml, 4-methyl-2-oxopentanoate-d<sub>3</sub> at 1000ng/ml, N-acetylthreonine-d<sub>5</sub> at 5000 ng/ml, 3-methoxytyrosine-d<sub>3</sub> at 1000 ng/ml, in acetonitrile/water (1:1); C. 1-linoleoyl-GPC-d<sub>9</sub> 20,000 ng/ml in ethanol. Six calibration samples were made in acetonitrile/water (1:1) and plasma. (Table S6). Since analyte concentrations are reported in the weight/volume format (“ug/mL”) and not in molar concentrations, the calculation of the final concentration includes a correction to account for the difference in molecular weight between the surrogate reference standard linoleoyl-GPC and arachidonoyl-GPC. 50μL of 382 human EDTA plasma samples, 48 quality control plasma aliquots, 6 calibration standards and a blank internal standard (H<sub>2</sub>O) were each spiked with 20μL of internal standard working solution and with acetonitrile/water (1:1) and or ethanol (1:1:2) and 200-500 μL of methanol or methanol with 1% formic acid. Samples were vortexed and centrifuged to precipitate proteins. 180μL of the supernatant was dried under a stream of nitrogen at 40<sup>0</sup>C, reconstituted in 75μL of water or 75 μl of water containing 1% formic acid, vortexed, centrifuged. Also, 180 μl of clear organic upper layer and 80 μl of DNPH solution (1% DNPH in acetonitrile/acetic acid) were heated at 60°C for 1 h. The treated samples were injected onto a Waters Acquity UPLC/Thermo Quantum Ultra triple quadrupole LC/MS/MS system with HESI source

equipped with a reversed phase chromatographic column. The peak areas of the respective product ions were measured against the peak areas of the corresponding internal standard product ions (Fig. S9). The monitored ion masses (SRM mode) are listed (Table S7). For arachidonoyl-GPC a reference standard was not commercially available. The close analogue linoleoyl-GPC was utilized as a surrogate reference compound for calibration assuming similar molar response factors for both compounds. With quantitation of acyl-GPCs, it appears that acyl-GPCs exhibit similar molar response factors when monitoring the same Q3-fragment ( $m/z$  184) for these compounds. Therefore, 1-arachidonoyl-GPC was measured by monitoring the 244  $\rightarrow$  184 trace and calibrated using a calibration curve that was obtained from monitoring the 220  $\rightarrow$  184 trace for linoleoyl-GPC in calibration standard samples. Since analyte concentrations are reported in the weight/volume format (“ug/mL”) and not in molar concentrations, the calculation of the final concentration includes a correction to account for the difference in molecular weight between the surrogate reference standard linoleoyl-GPC and arachidonoyl-GPC. Chromatographic conditions for butyrylcarnitine, 2-methylbutyrylcarnitine, hexanoylcarnitine and 4-cis-decenoylcarnitine were: Mobile phase A, 0.1% formic acid in water; Mobile phase B, 0.5% formic acid in acetonitrile; UHPLC column, Waters Acquity C 18 BEH, 1.7 micron  $2.1 \times 100$  mm; Injection volume, 10 $\mu$ L. For N-acetylthreonine, 3-methoxytyrosine, HPLA linoleoyl-GPC and arachidonoyl-GPC were mobile phase A, 0.1% formic acid in water; mobile phase B, acetonitrile/methanol (1:1); UPHLC Column, Pinnacle Propyl, 1.9  $\mu$   $2.1 \times 100$  mm; injection volume 8.0  $\mu$ L. For 4-methyl-2-oxopentanoate were: Mobile phase A, 5 mM ammonium formate in H<sub>2</sub>O; mobile phase B, acetonitrile/methanol (1:1); UHPLC column, Acquity C 18 BEH, 1.7  $\mu$   $2.1 \times 100$  mm; injection volume, 1  $\mu$ L. For pseudouridine, mobile phase A, 0.1% formic acid in H<sub>2</sub>O; mobile phase B acetonitrile/methanol (1:1); UHPLC column, Acquity C 18 BEH, 1.7  $\mu$   $2.1 \times 100$  mm; injection volume, 2.0  $\mu$ L. Quantitation was performed using weighted linear least squares regression analysis generated from fortified calibration standards prepared immediately prior to each run (Fig. S10).

### **Proteome Sample Preparation and Mass Spectrometry Analysis**

Plasma samples were thawed on ice at Monarch Life Sciences Inc. and the top-12 most abundant proteins (albumin, IgG, fibrinogen, transferrin, IgA, IgM, haptoglobin,  $\alpha$ 2-macroglobulin,  $\alpha$ 1-acid glycoprotein,  $\alpha$ 1-antitrypsin and apolipoprotein A-I and A-II) were removed using Seppro IgY-12 Columns (GenWay Biotech Inc.). Column flow-throughs were

denatured by 8M urea, reduced by triethylphosphine, alkylated by iodoethanol and digested by trypsin, as described(82). Tryptic digests (~20 µg) were analyzed using a Thermo-Fisher Scientific LTQ linear ion-trap mass spectrometer coupled with a Surveyor HPLC system. Peptides were separated on a C18 reverse phase column (i.d. = 2.1 mm, length = 50 mm) with a flow rate of 200µl/min and eluted with a gradient from 5 to 45% acetonitrile developed over 120 min. All injections were randomized and the instrument was operated by the same operator for the study. Data were collected in the triple-play mode (MS scan, zoom scan and MS/MS scan). Data were filtered and analyzed as described (83, 84). Database searches were carried out using both the X!Tandem and SEQUEST algorithms (85, 86). Parameters were set as follows: a mass tolerance of 2 Da for precursors and 0.7 Da for fragment ions, two missed cleavage sites allowed for trypsin, carbamidomethyl cysteine as fixed modification, and oxidized methionine as optional modification. The q-value represented peptide false identification rate and was calculated by incorporating Sequest and X!Tandem results in addition to a number of other relevant factors such as  $\Delta$  [M+H]<sup>+</sup> and charge state (83). Observed peptide MS/MS spectrum and theoretically derived spectra were used to assign quality scores (Xcorr in SEQUEST and e-Score in X!Tandem). Protein identities were assigned priority scores (from 1 to 4): based on the peptide ID confidence (q-value) and the number of unique peptides used for protein identification: Priority 1, high peptide confidence (>90%) and multiple unique sequences; Priority 2, high peptide confidence (>90%) and single peptide sequence; Priority 3, moderate peptide confidence (between 75% and 89%) and multiple unique sequences; Priority 4, moderate peptide confidence (between 75% and 89%) and single peptide sequence. Priority 1 protein identifications were employed for analyses, except protein-metabolite correlations, which also employed Priority 2 identifications that were observed at both  $t_0$  and  $t_{24}$ .

Protein quantification was carried out using the method of Higgs et al.(84). Briefly, raw files were acquired from the LTQ and all extracted ion chromatograms (XIC) were aligned by retention time. For protein quantification, each aligned peak must match four criteria: precursor ion, charge state, fragment ions (MS/MS data) and retention time (within a one-minute window). AUC Peak intensities were log<sub>2</sub> transformed before quantile normalization (87) to ensure that every sample had a peptide intensity histogram of the same scale, location and shape. Normalization removed trends introduced by sample handling, sample preparation, total protein differences and changes in instrument sensitivity while running multiple samples. If multiple peptides had the same protein identification, then their quantile normalized log<sub>2</sub> intensities were averaged to obtain log<sub>2</sub> protein intensities.

## Proteome MS Spectral Counts Validation Analysis

Raw LC-MS/MS data files collected on a LTQ Linear Ion Trap (ThermoFisher Scientific) were delivered to the Duke Proteomics Core Facility as .raw files with appropriate deidentified clinical data. The centroid MS/MS data was processed into .mgf files using Mascot Distiller v2.0 (Matrix Sciences, Inc), and searched with Mascot v2.2. Mascot was set up to search the Swissprot v57.5 database (www.uniprot.org) with human taxonomy and decoy database enabled, trypsin specificity with a maximum of 2 missed cleavages, and 2 Da precursor and 0.8 Da product ion mass accuracy. Iodoacetamide derivative of cysteine was specified as a fixed modification, and deamidation of asparagine, deamidation of glutamine, and oxidation of methionine were specified in Mascot as variable modifications.

Scaffold version 3.0 (Proteome Software Inc., Portland, OR) was used to import search results directly from Mascot and validate MS/MS based peptide and protein identifications. Because of the number of analyses, the time zero (n=150) and 24 hour (n=131) datasets were imported and validated in Scaffold independently. For both data sets, peptide identifications were accepted if they could be established at greater than 50.0% probability as specified by the Peptide Prophet algorithm (93), and protein identifications were accepted if they could be established at greater than 90.0% probability and contained at least 1 identified peptide. Protein probabilities were assigned by the Protein Prophet algorithm (94). Proteins that contained similar peptides and could not be differentiated based on MS/MS analysis alone were grouped to satisfy the principles of parsimony. Non-normalized spectral counting reports were then exported independently for each of the datasets, and compiled in Microsoft Excel 2007. Using the Protein Prophet Scores, the protein search results from both datasets were compiled, sorted and curated using reverse (decoy) sequences identified to set the protein false discovery rate of the aggregate dataset to 2.5%. Proteins identified below this threshold were discarded from the dataset. Follow-up comparative quantitation between individuals and timepoints was performed using spectral counting in the form of number of identified spectra per protein.

## Statistical Analyses

**Bayesian clinical factor analysis:**  $[c_j = B y_j + A(s_j \circ z_j) + \epsilon_j]$  The formula defines B as the relationship between data and the clinical feature, while A defines random or undefined effects and  $\epsilon$  accounts for random noise. The term  $A(s_j \circ z_j)$  handles latent factors, where  $s_j$  is a real vector,  $z_j$  is a sparse binary vector, and A is a factor matrix. The Hadamard

(pointwise) vector product reflected by  $s_j \circ z_j$  defines the set of columns of  $A$  needed to represent the data. Through  $z_j$  the model infers the number of latent factors (columns) that are needed. The clinical features were further normalized with zero-mean and standard deviation.

**Pairwise cross correlations:** Briefly, all proteins and all metabolites were included, with the exception of unannotated GC/MS determined compounds or redundant entries. Metabolite and protein log<sub>2</sub> values were transposed into a wide format and the correlations were merged based on patient identification.

**Support vector machines (SVM):** Data from 173 unique sepsis survivors and deaths was used; where data from the same person was available at both  $t_0$  and  $t_{24}$ , one time point was randomly chosen and included (87 for training and the remaining 86 for testing). Values were normalized by subtracting the mean and dividing by the standard deviation. 100 random partitions were performed for training and test data for each setting. Performance was evaluated by test data scores for AUC and accuracy. Accuracy was highly dependent on the threshold chosen for the scores. In all experiments, assuming there were  $N_{SD}$  sepsis nonsurvivors samples for training, the scores of the training samples were sorted and the  $N_{SD}^{\text{th}}$  score was used as the cutoff threshold  $T$  with the test data. Any test samples with scores  $>T$  were declared to be sepsis nonsurvivors and any with scores  $\leq T$  were declared to be sepsis survivors. Parameter weights were derived for linear SVM with the training samples. It should be noted that each feature was not simply multiplied by each weight since the mean of each feature worked as an offset and was not informative for classification.



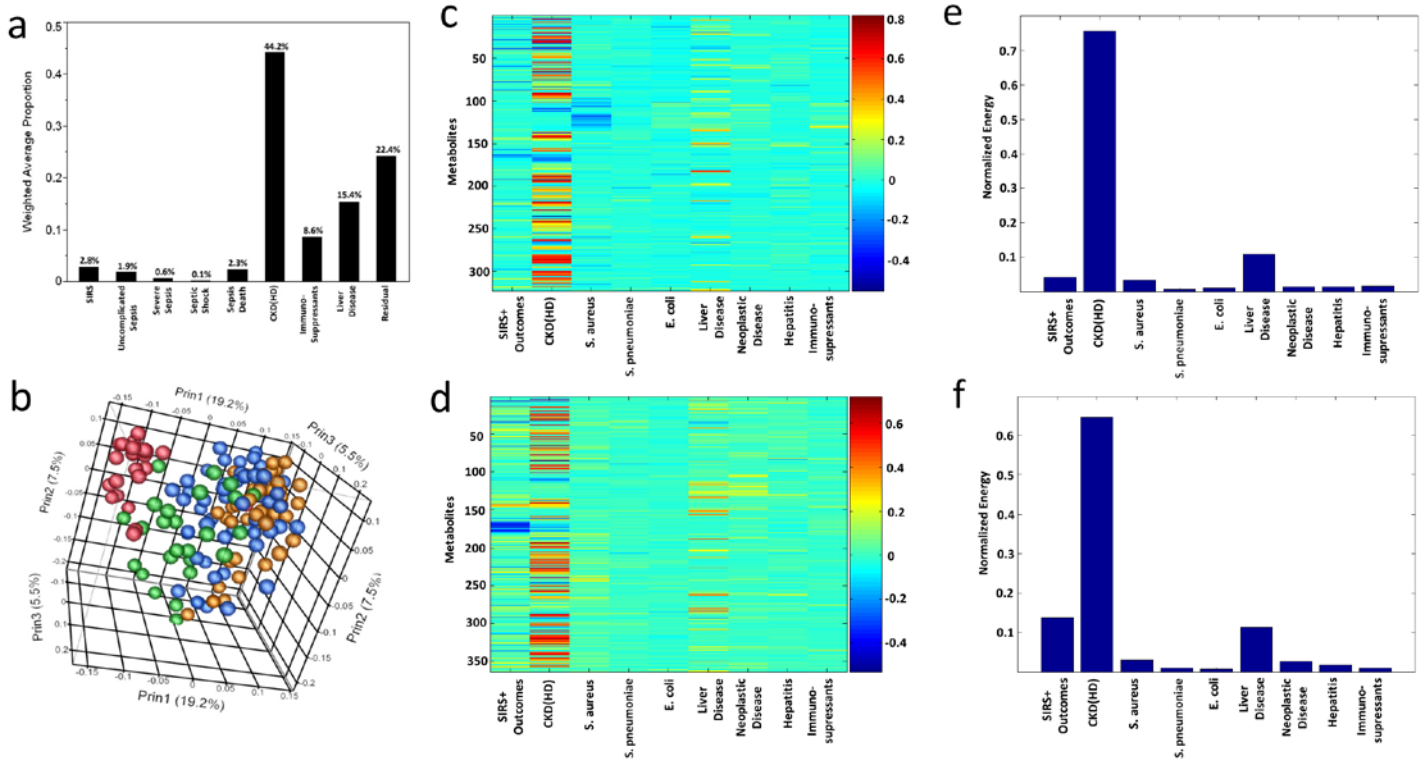

**Figure S1. Sepsis group effects and clinical factors that lead to variation in the plasma metabolome. a.** Variance decomposition (with Pearson product-moment correlation) for sepsis groups, chronic kidney disease/hemodialysis (CKD(HD)), liver disease, and immunosuppressant therapy. CKD(HD): determined by estimated glomerular filtration rate (eGFR), or hemodialysis. **b.** Unsupervised principal components analysis (PCA) of patient plasma metabolites based on renal function. CKD1/2 (yellow, eGFR >75 mL/min, n = 44); CKD3 (blue, eGFR 32-74 mL/min, n = 56); CKD4/5 (green, eGFR 0-31 mL/min, n = 25); hemodialysis (HD, red, n = 24). B-matrices of Bayesian factor analysis (**c** and **d**) and the normalized factor scores (**e** and **f**) of sepsis group membership (SIRS+Outcomes), renal category (CKD(HD)) and other clinical parameters in log-transformed plasma metabolites at  $t_0$  (**c** and **e**) and  $t_{24}$  (**d** and **f**). Sepsis group membership (SIRS+Outcomes) was defined as SIRS, sepsis survival and sepsis nonsurvivor. Renal function was defined as eGFR>75mL/min=0; 32-74mL/min=1; <31mL/min=2; hemodialysis=3. Clinical parameters were fit to a normal distribution with mean of 0 and standard deviation of 1. CKD(HD), liver disease and SIRS+Outcomes largely define changes in the plasma metabolome at  $t_0$  in descending order. Normalized factor scores of sepsis group membership (SIRS+Outcomes) increased from 0.06 at  $t_0$  to 0.14 at  $t_{24}$ .

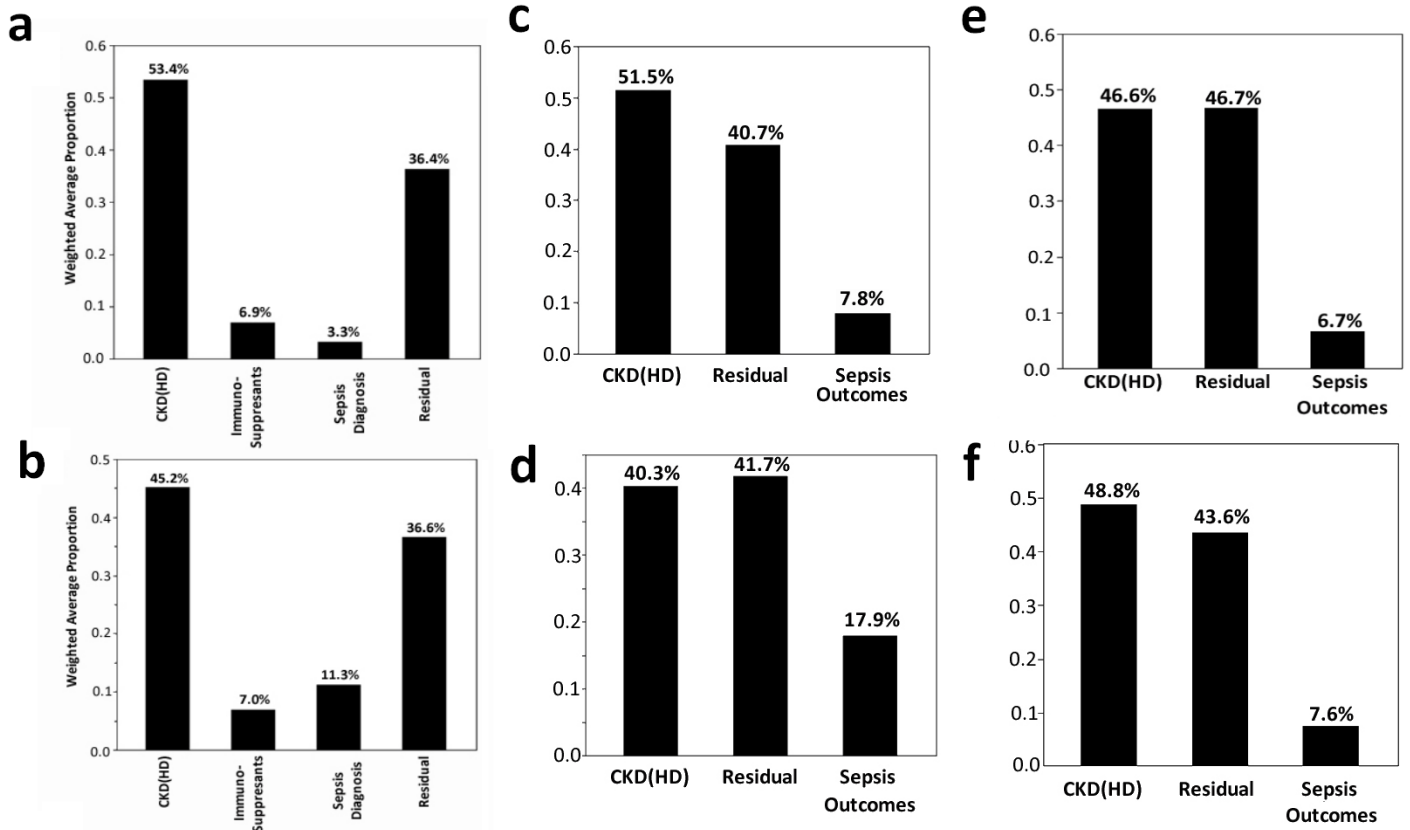

**Figure S2. Variance decomposition (with Pearson correlation) of metabolomic changes in sepsis diagnosis and outcomes.** Sepsis diagnosis (SIRS-positive vs. sepsis survivors) at  $t_0$  (a) and  $t_{24}$  (b). Plasma metabolite changes in sepsis outcomes (survival or death) in the derivation cohort at  $t_0$  (c) and  $t_{24}$  (d), and in the validation cohort at  $t_0$  (e) and  $t_{24}$  (f).

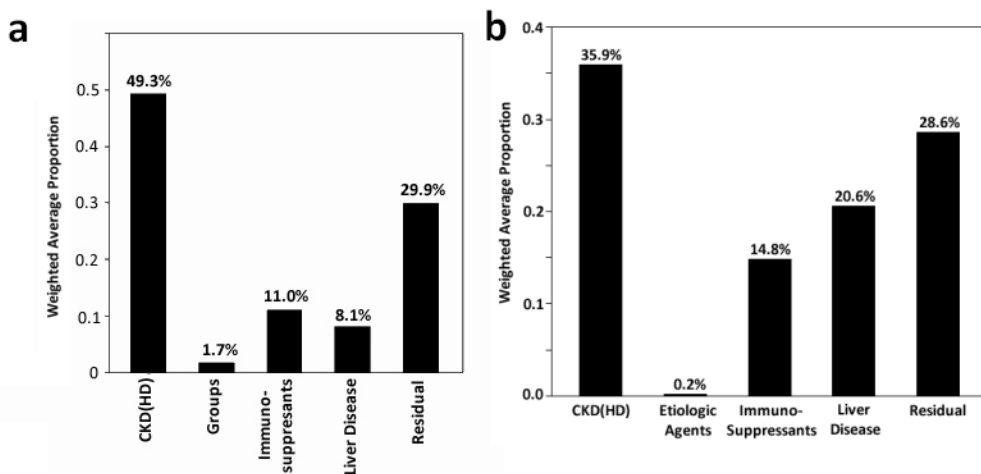

**Figure S3. Variance components attributable to sepsis survivor subgroups and etiologic agents** Sepsis subgroups (uncomplicated sepsis, severe sepsis and septic shock, panel a) and etiologic agents (*E. coli* (n=16), *S. pneumoniae* (n=31) and *S. aureus* (n=27), panel b) at  $t_0$  were too small (1.7% and 0.2%, respectively) to detect meaningful changes (FDR-corrected (5%) ANOVAs with non-hypothesis components of variance as fixed effects).

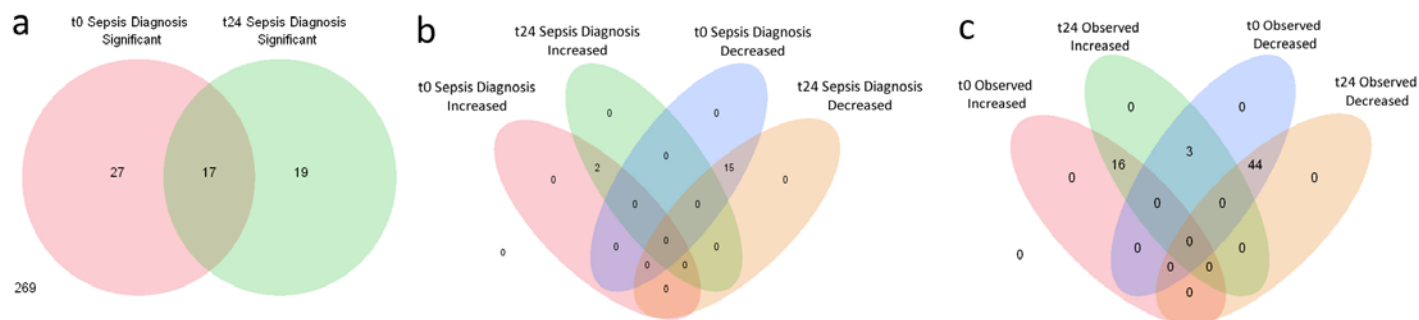

**Figure S4. Venn diagrams of metabolites in sepsis diagnosis.** Significant differences (weighted ANOVA, 5% FDR) in plasma metabolite levels between SIRS+ control patients and sepsis survivors at t<sub>0</sub> and t<sub>24</sub> (a), concordance of direction of change of significantly altered metabolites (b), and concordance of direction of change of metabolites exhibiting significant differences at one of the time points (c).

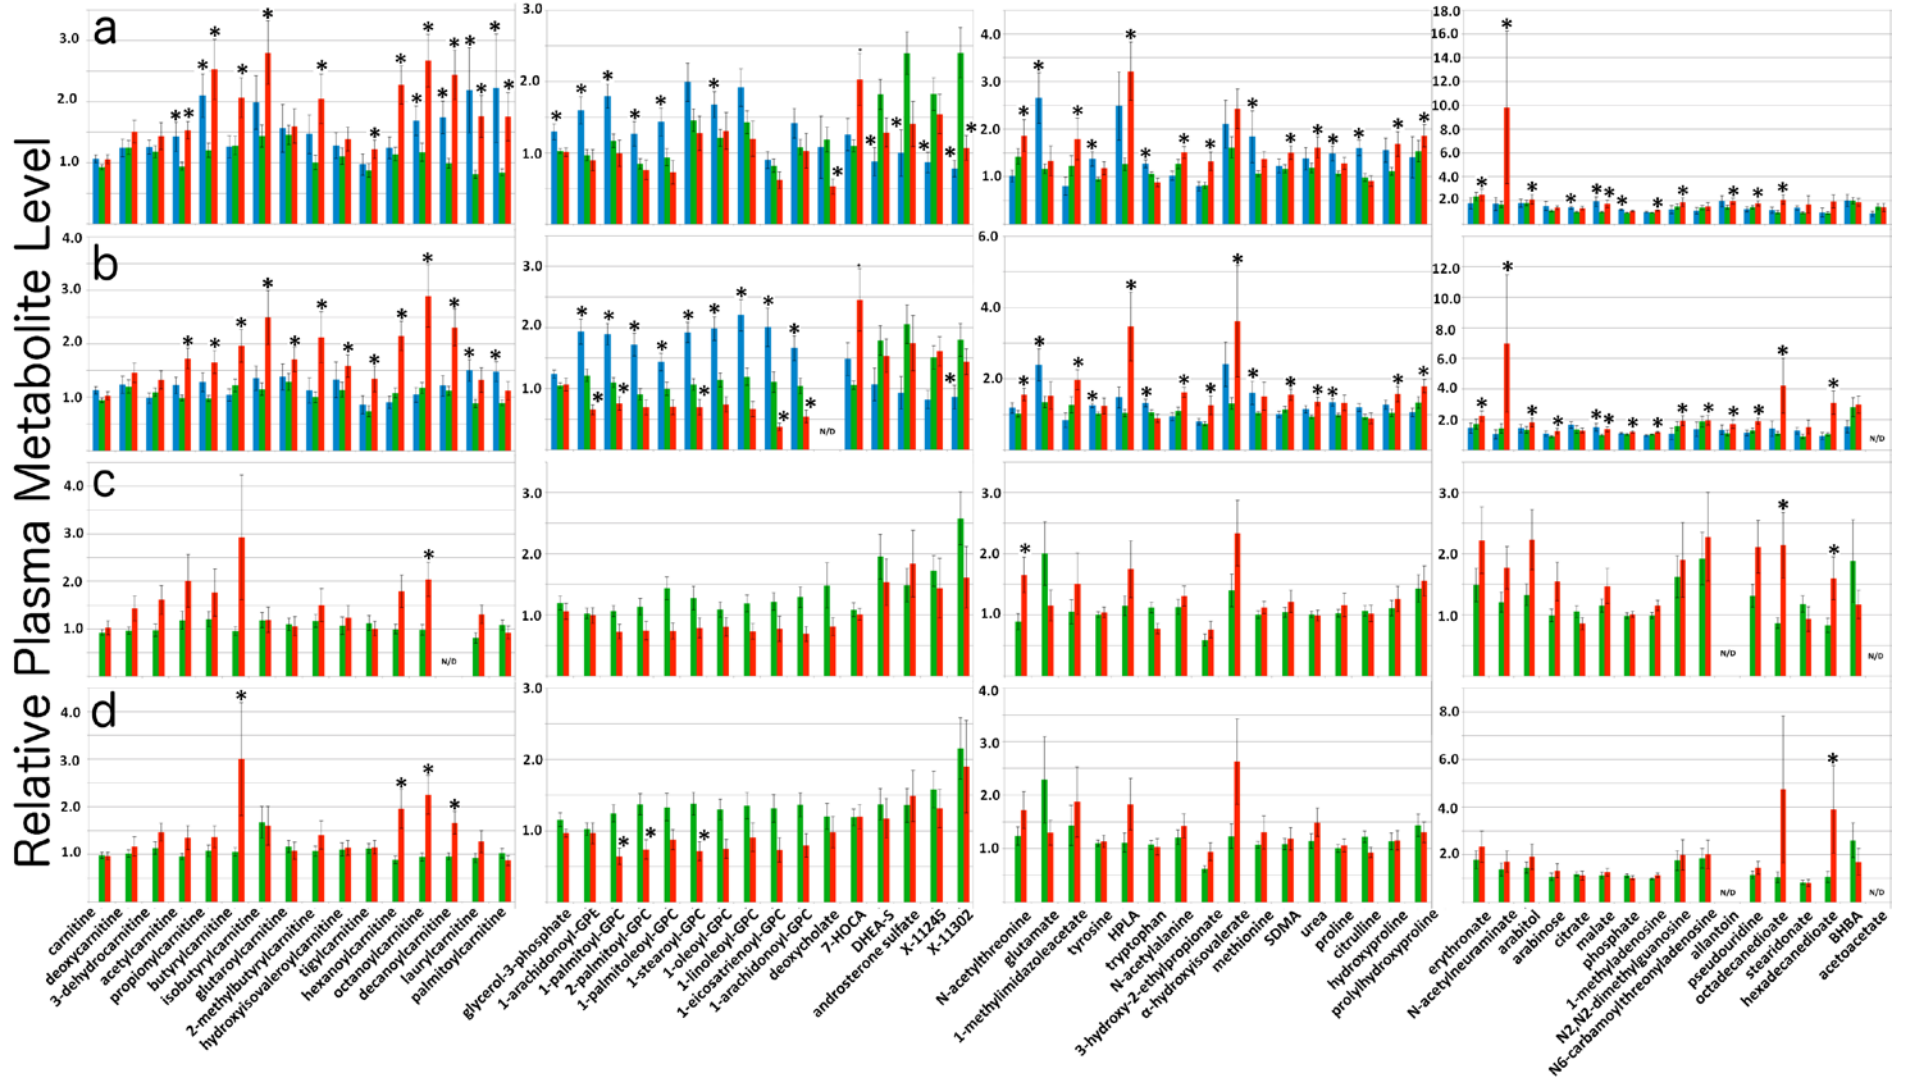

**Figure S5. Bar graphs of plasma metabolite levels at  $t_0$ ,  $t_{24}$  and in validation patients at  $t_0$  and  $t_{24}$**  Plasma protein-metabolite correlations for **(a)**  $t_0$ , **(b)**  $t_{24}$ , **(c)**  $Vt_0$ , **(d)**  $Vt_{24}$ . Y-axis displays average scaled plasma metabolite concentrations. Error bars are SEM. Columns represent controls (SIRS+; blue), sepsis survivors (green) and sepsis nonsurvivor (red). Asterisks indicate significant differences from sepsis survivors (weighted ANOVA with 5% FDR **(a,b)**, 25% FDR **(c)** or 15% FDR **(d)**). All but the relevant negatives (carnitine, deoxycarnitine, 3-dehydrocarnitine, 3-dehydrocarntine, steridonate, 3-hydroxybutyrate (BHBA) and acetoacetate) were significant. Abbreviations: Glycerophosphethanolamine (-GPE), glycerolphosphocholine (-GPC), 7- $\alpha$ -hydroxy-3-oxo-4-cholestenoate (7-HOCA), dehydroepiandrosterone sulfate (DHEA-S), 3-[4-hydroxyphenyl]lactate (HPLA), symmetric dimethylarginine (SDMA), unannotated disulfated steroids (X-11245 and X-11301).

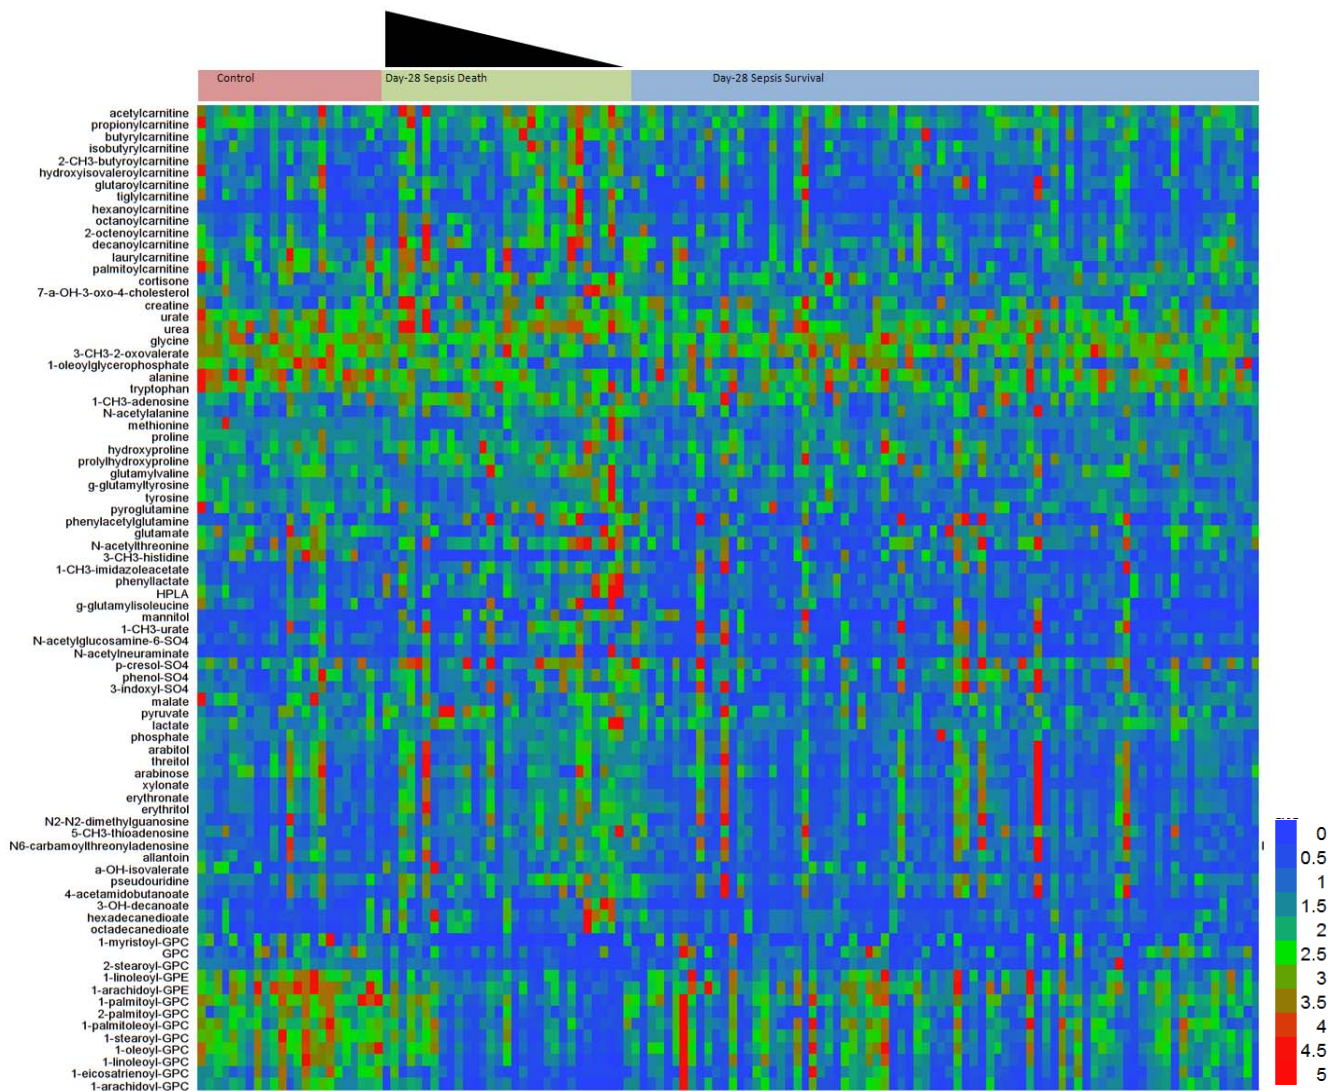

**Figure S6. Metabolomics cell plot.** Comparison of annotated plasma metabolite levels at  $t_{24}$  in 132 discovery subjects (represented by columns). Individuals who died were ordered by days-to-death (decreasing from left to right as indicated by the black triangle). Rows show 82 host metabolites with statistically significant differences between groups (stratified ANOVA,  $p < 0.05$ ). Colors indicate log-transformed standardized values.



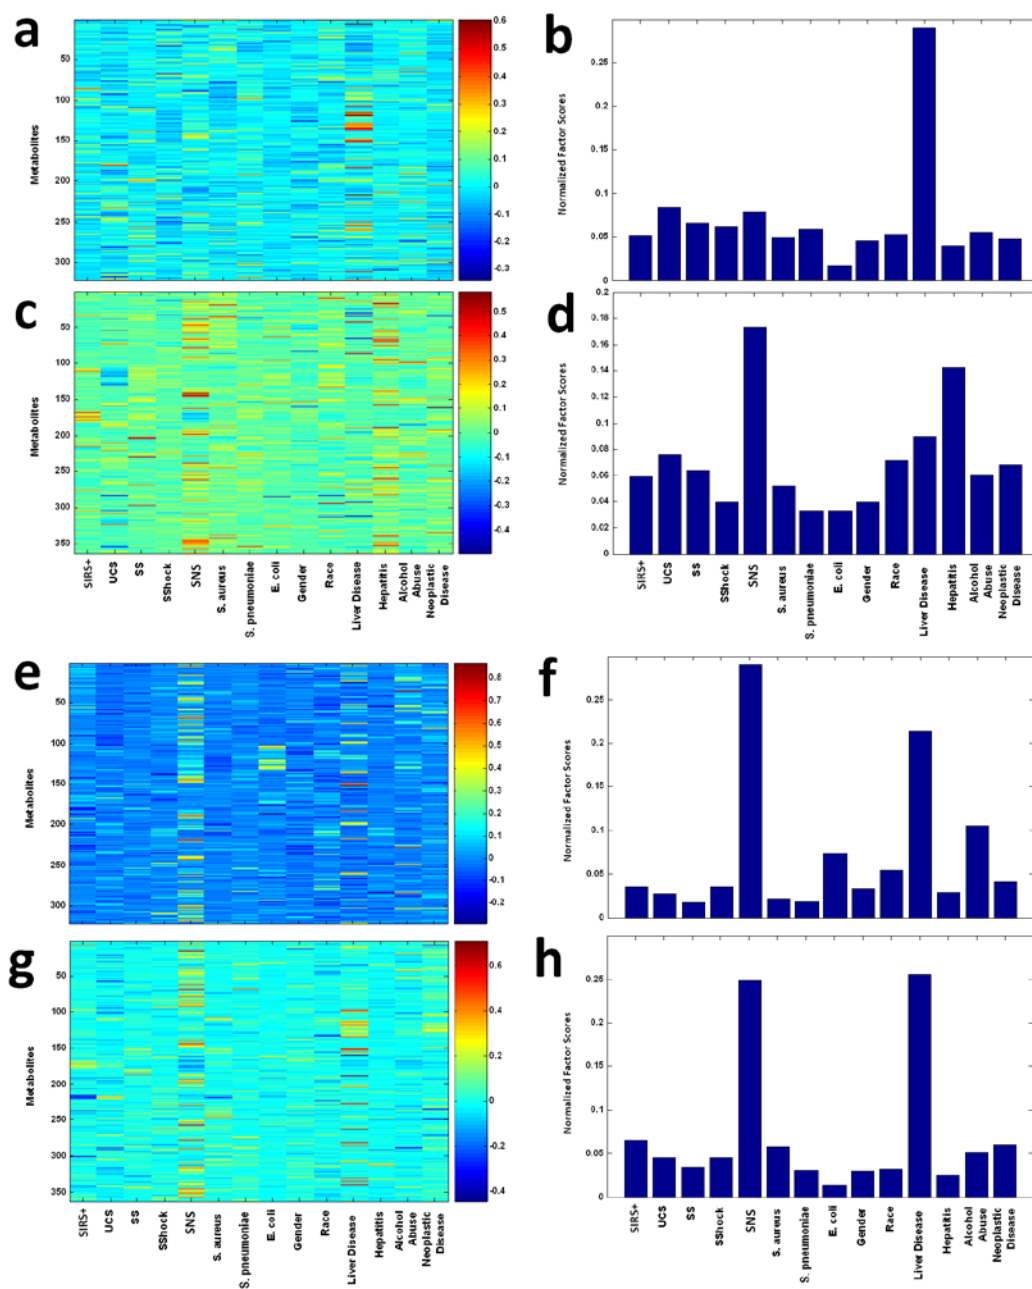

**Figure S7. B-matrices of Bayesian factor analysis and the normalized factors scores.** B-matrices (a,c,e,g); normalized factor score ( b,d,f,h). SIRS+ outcomes, and clinical parameters in log-transformed plasma metabolites. Sepsis outcomes [SIRS+, uncomplicated sepsis (UCS), sepsis survivor (SS), septic shock (SShock) and sepsis nonsurvivor (SNS)] and clinical parameters were fit to a normal distribution with mean of 0 and standard deviation of 1. Normal renal function (eGFR >74 mL/min)  $t_0$  (a and b;  $n = 44$ ) and  $t_{24}$  (c and d;  $n = 36$ ); and poor renal function (eGFR 32-74 mL/min;  $t_0$  (e and f;  $n = 56$ ) and  $t_{24}$  (g and h;  $n = 53$ ). Individual metabolite factor score  $\geq 0.1$  or  $\leq -0.1$  was considered significant.

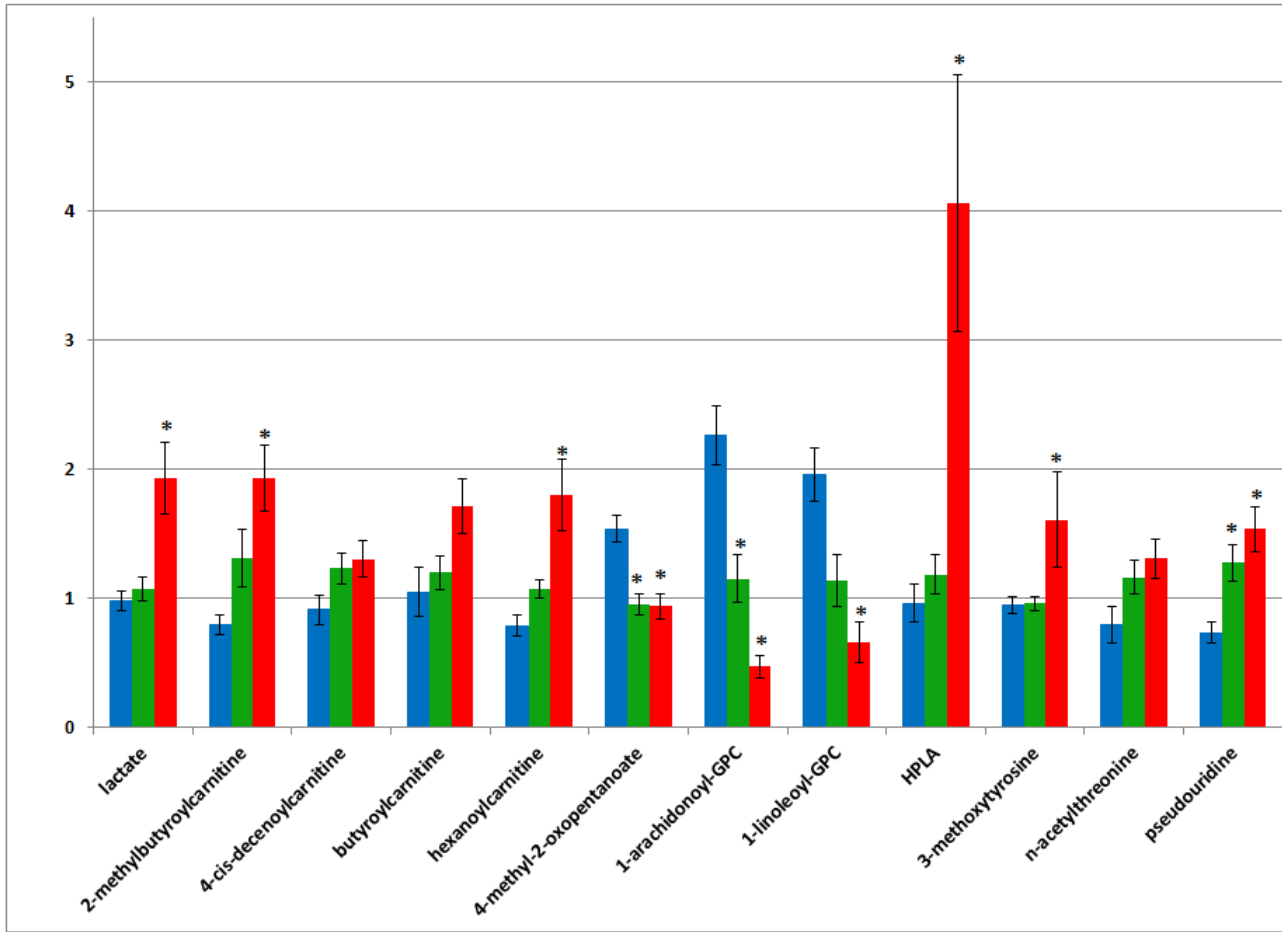

**Figure S8. Bar graphs of plasma metabolite levels of the RoCI sepsis cohort.** Y-axis displays average scaled plasma metabolite concentrations. Error bars are SEM. Columns represent controls (SIRS+; blue), sepsis survivors (green) and sepsis nonsurvivor (red). Asterisks indicate significant differences from sepsis survivors (ANOVA with 5% FDR. Abbreviations: Glycerophosphethanolamine (-GPE), glycerolphosphocholine (-GPC), 3-[4-hydroxyphenyl]lactate (HPLA).



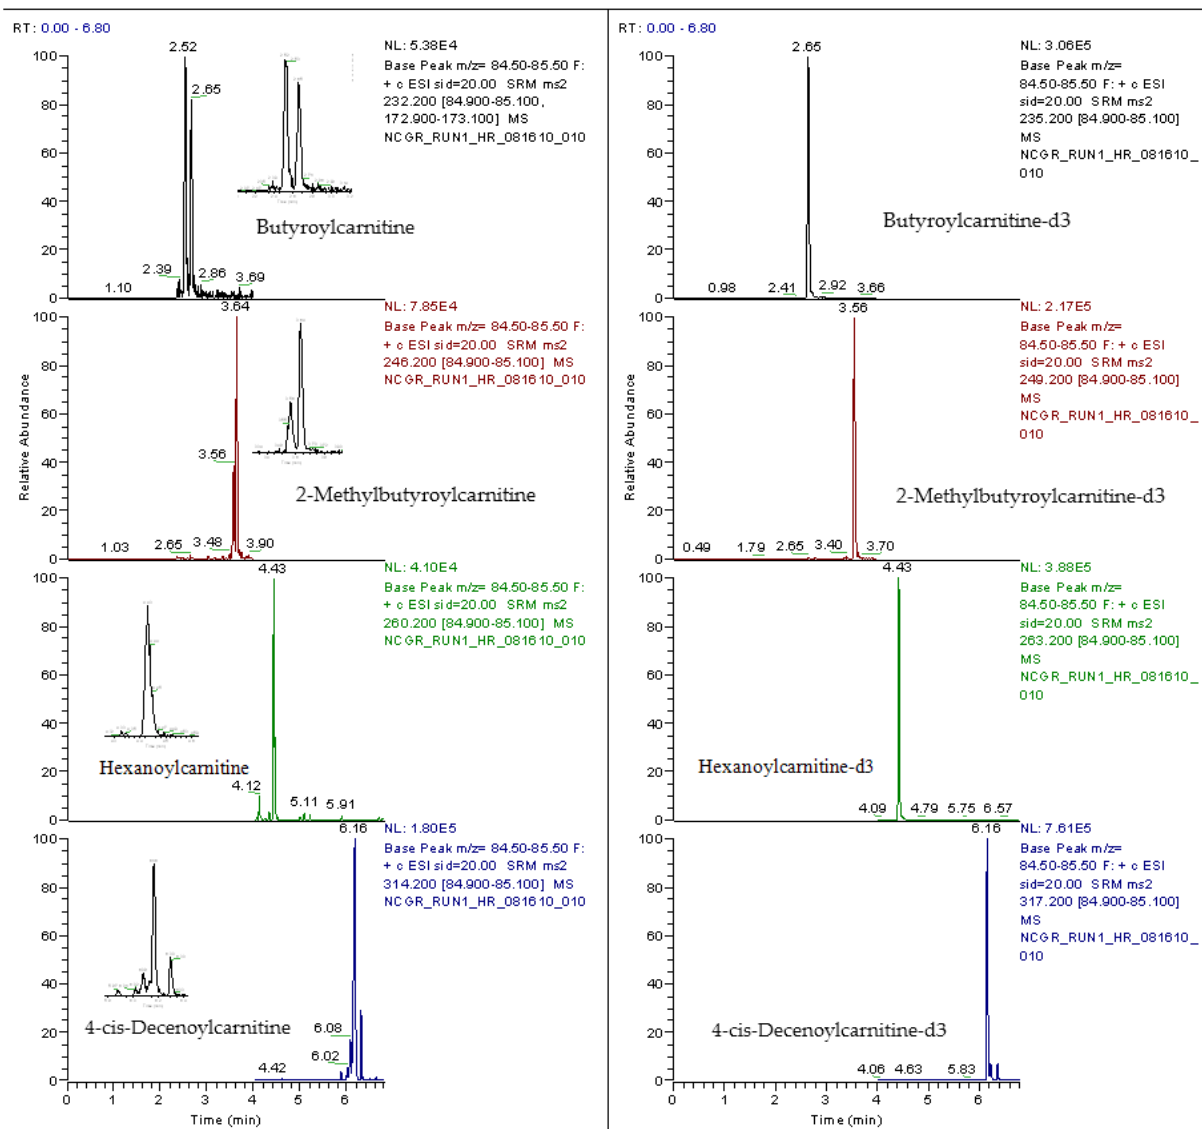

**Figure S9. Representative chromatograms of quantitative LC-MS-MS measurement.** Butyrylcarnitine, 2-Methylbutyrylcarnitine, Hexanoylcarnitine and 4-*cis*-Decenoylcarnitine (X-11421) in a subject plasma sample.

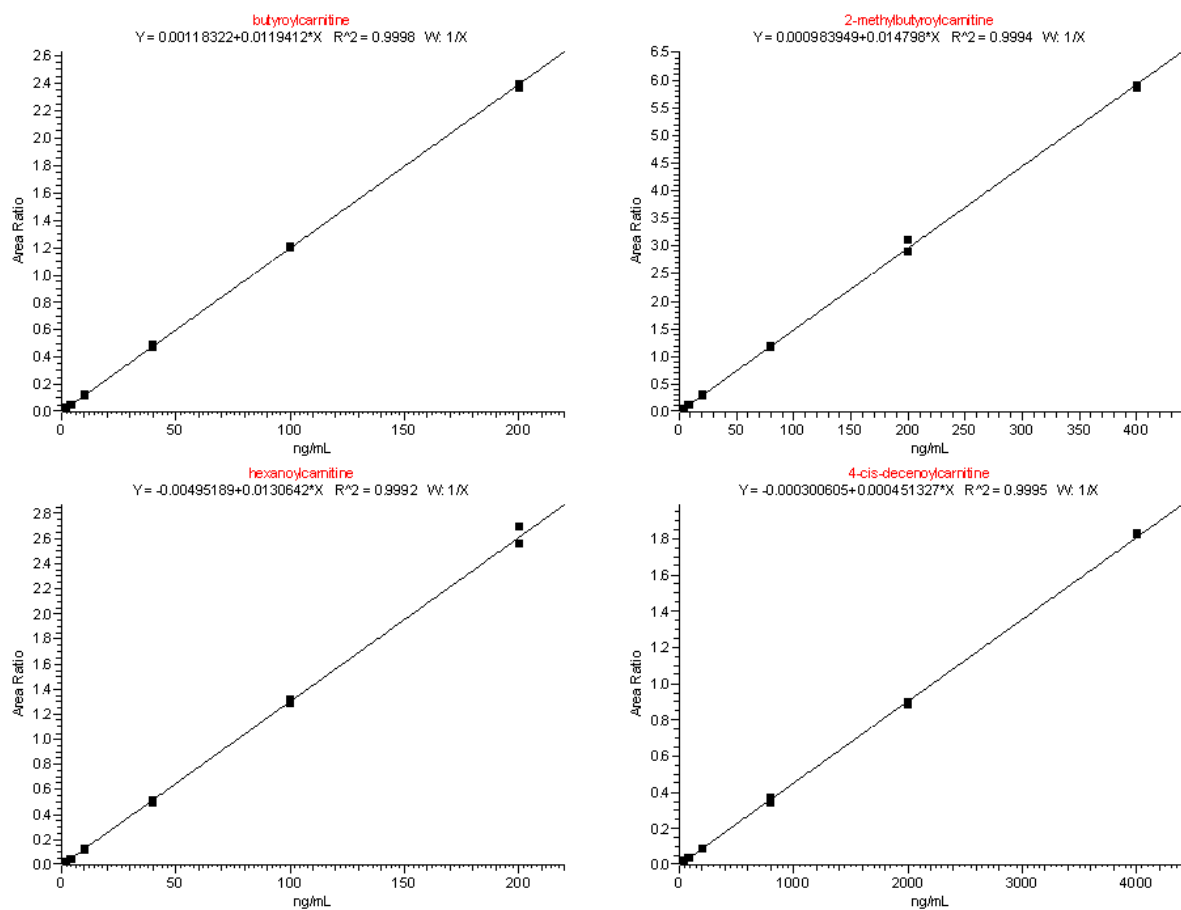

**Figure S10. Representative calibration curves of quantitative LC-MS-MS measurement. Butyrylcarnitine, 2-Methylbutyrylcarnitine, Hexanoylcarnitine and 4-cis-Decenoylcarnitine (X-11421).**

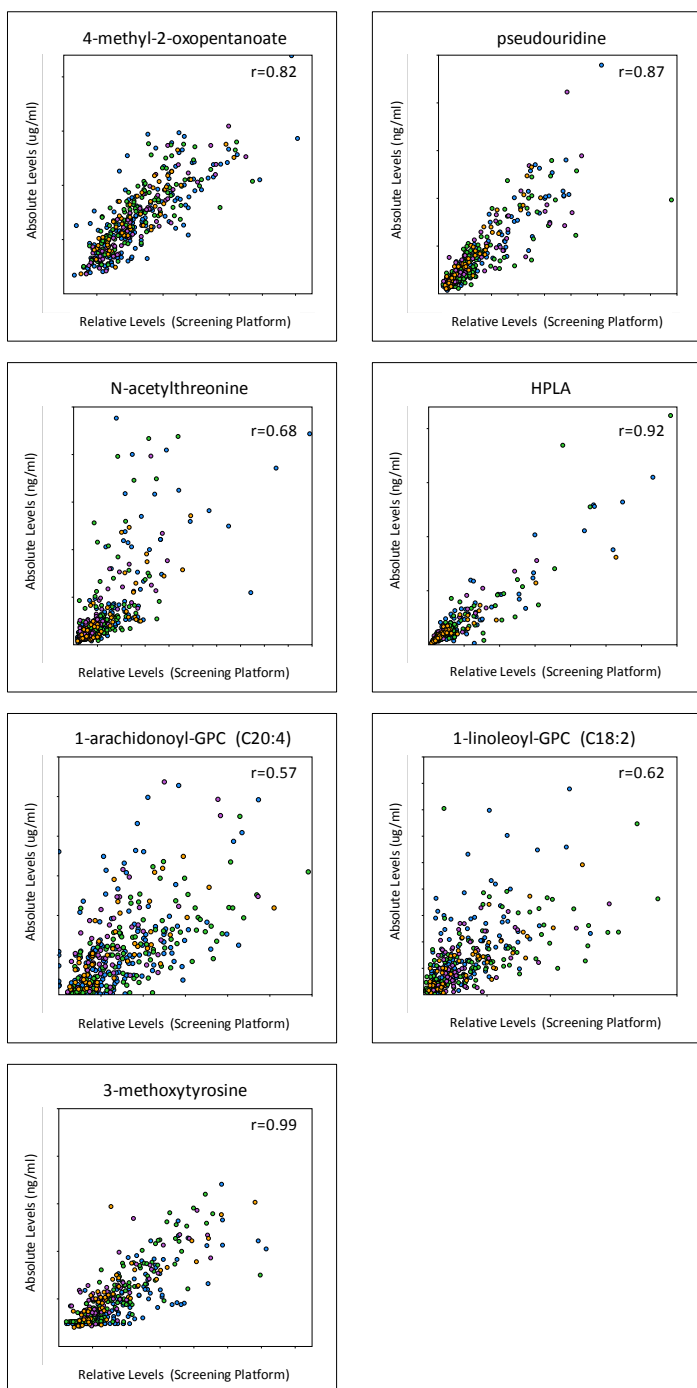

**Figure S11: Correlation plots of semi-quantitative screening data (x-axis) and quantitative targeted data (y-axis).**

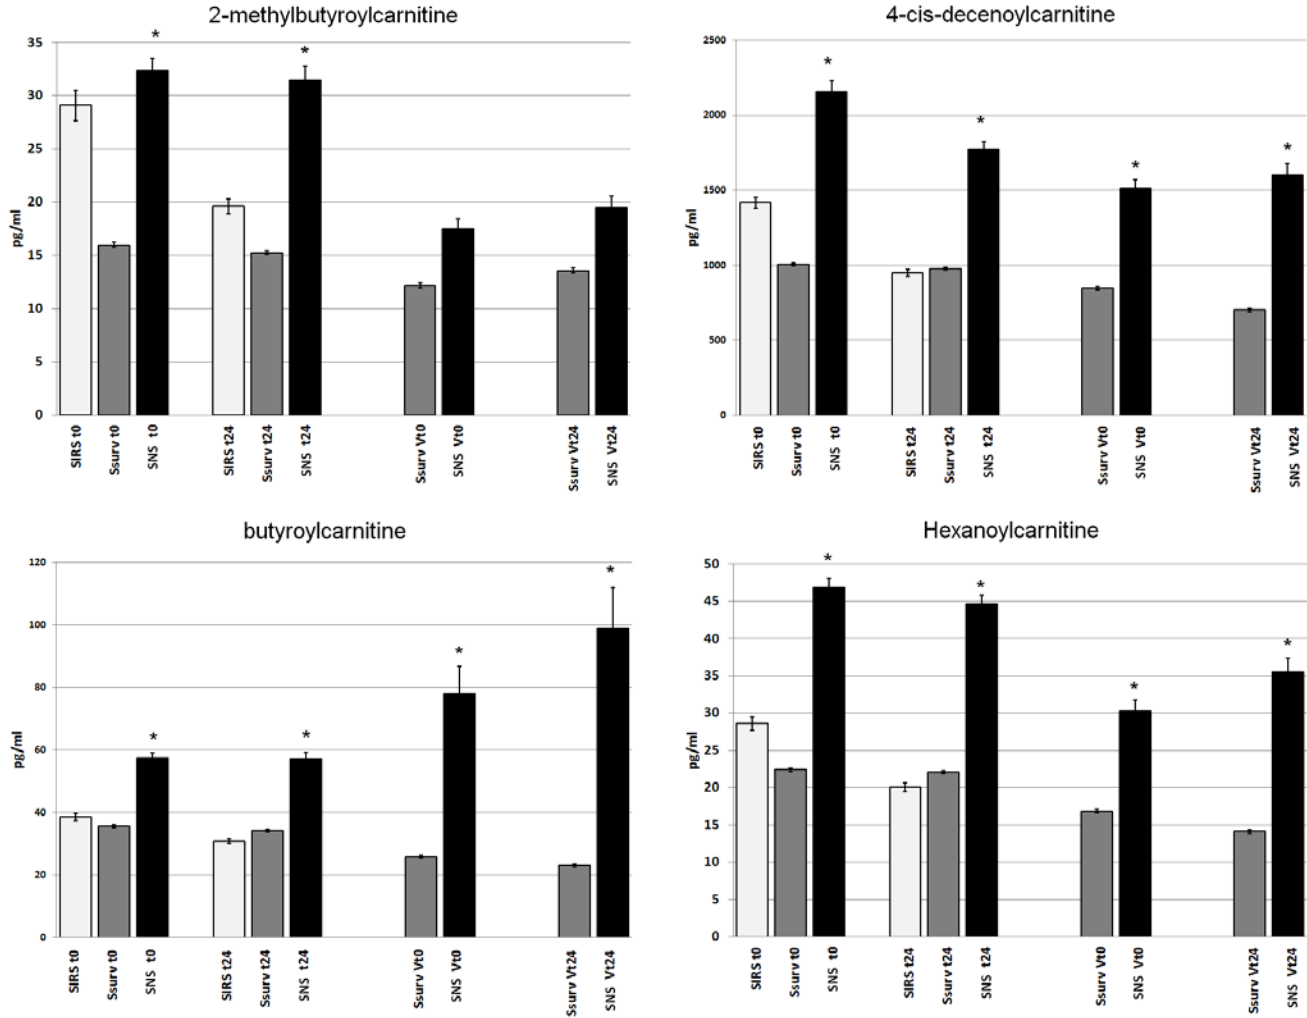

**Figure S12.** Bar graphs of plasma levels by targeted, quantitative MS-assays of butyrylcarnitine, 2-methylbutyrylcarnitine, hexanoylcarnitine and 4-*cis*-decenoylcarnitine. t<sub>0</sub>, t<sub>24</sub> and in validation patients at Vt<sub>0</sub> and Vt<sub>24</sub>. Y-axis displays average plasma metabolite concentrations. Error bars are SEM. Columns represent SIRS+ controls (white), sepsis survivors (grey) sepsis non survivor (black). \* p < 0.05.

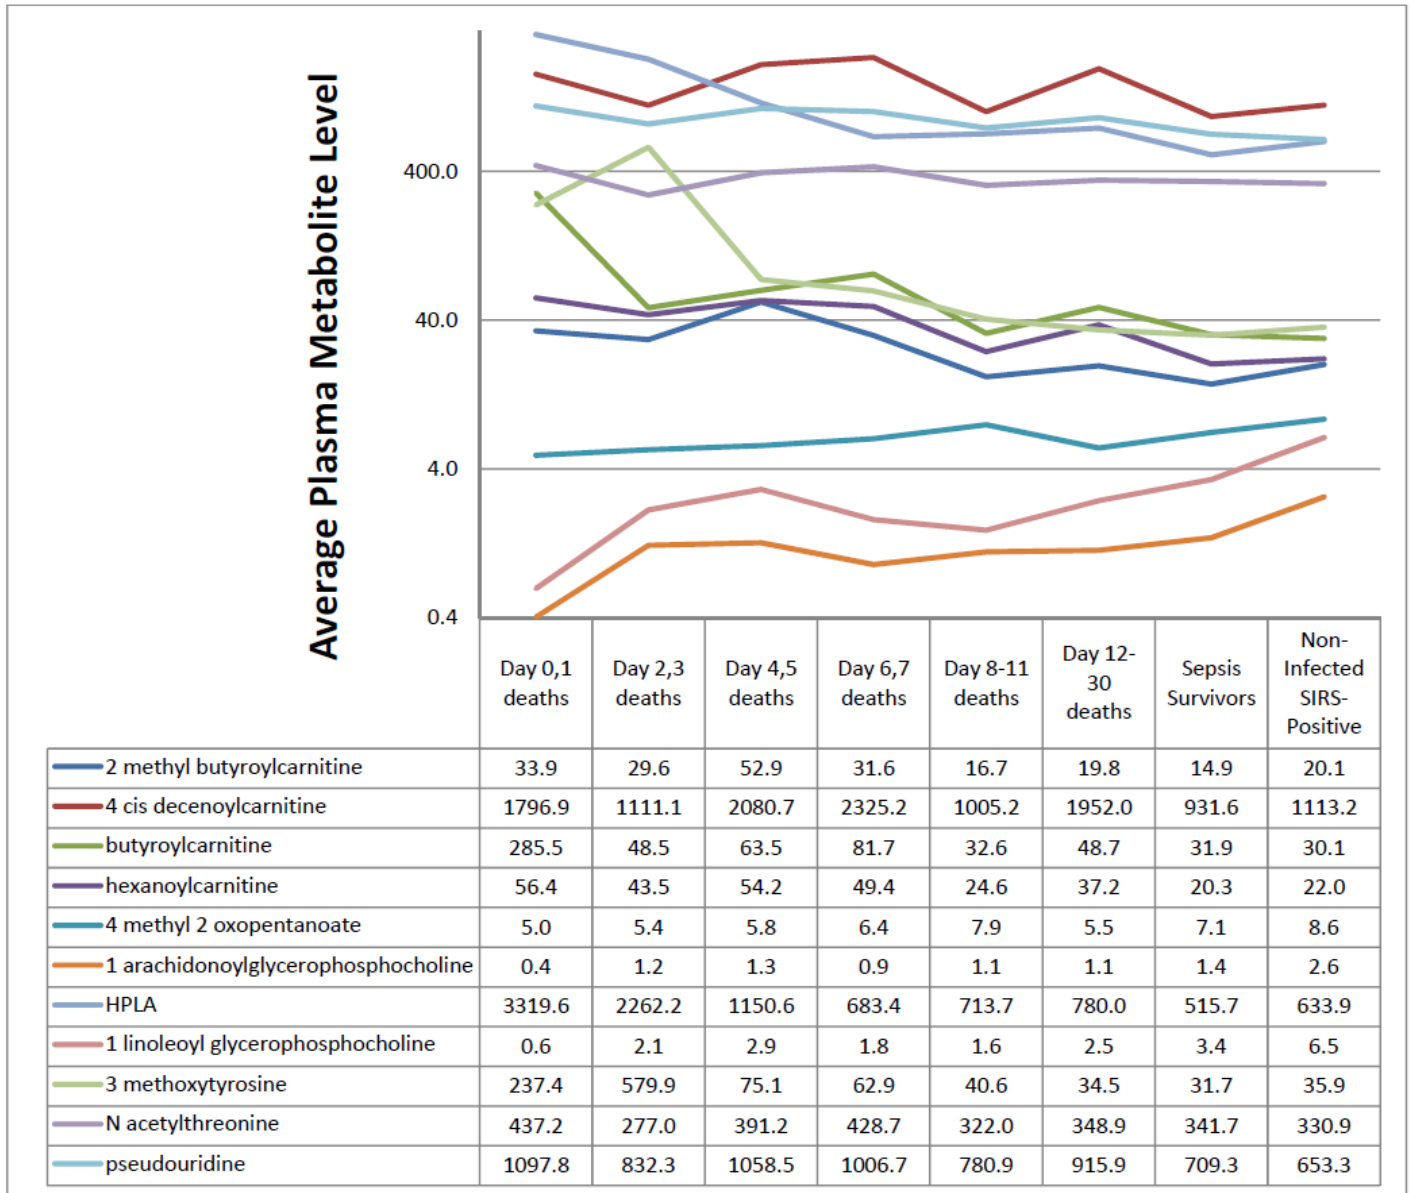

**Figure S13. Plasma levels of eleven metabolites in all patients showing relationships between time to death and metabolite values.** Plasma metabolite concentrations were determined by targeted, quantitative MS-assays and values are in pg/ml.

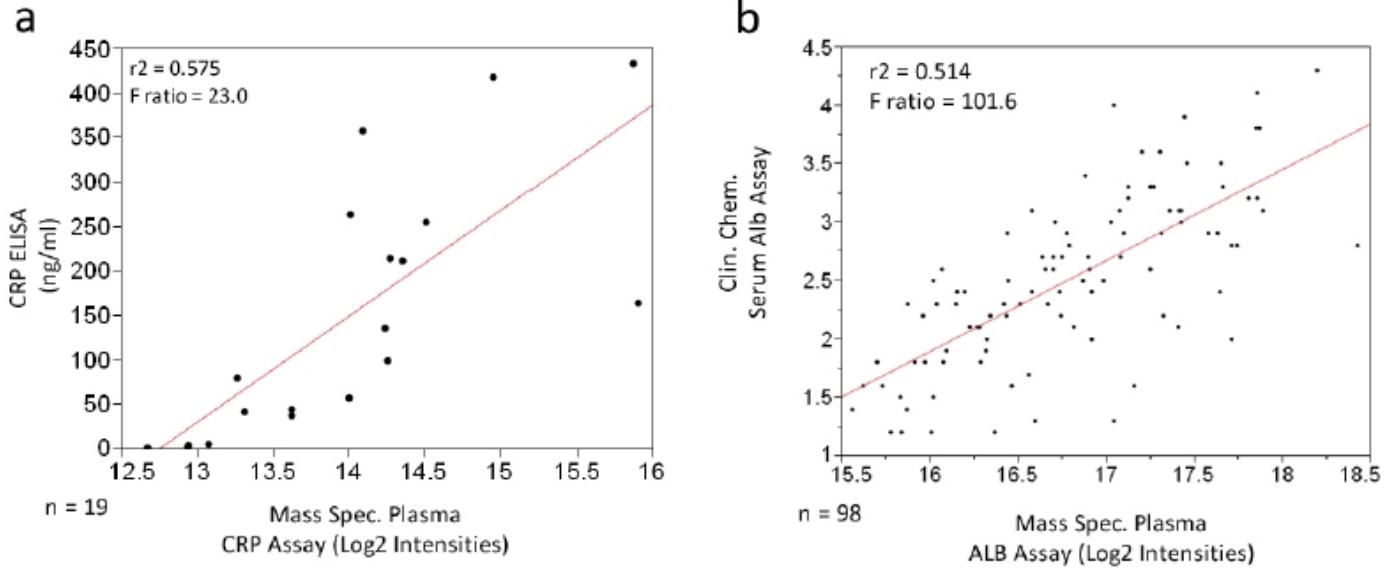

**Figure S14|Comparison of C reactive protein (CRP), and albumin (ALB) levels by serum immunoassay (ELISA) and plasma mass spectrometry in 19 and 98 patients, respectively.** MS values are log transformed, normalized, areas-under-the-curve of ion chromatograms after background noise removal. Albumin immunoassay values are in mg/dL.

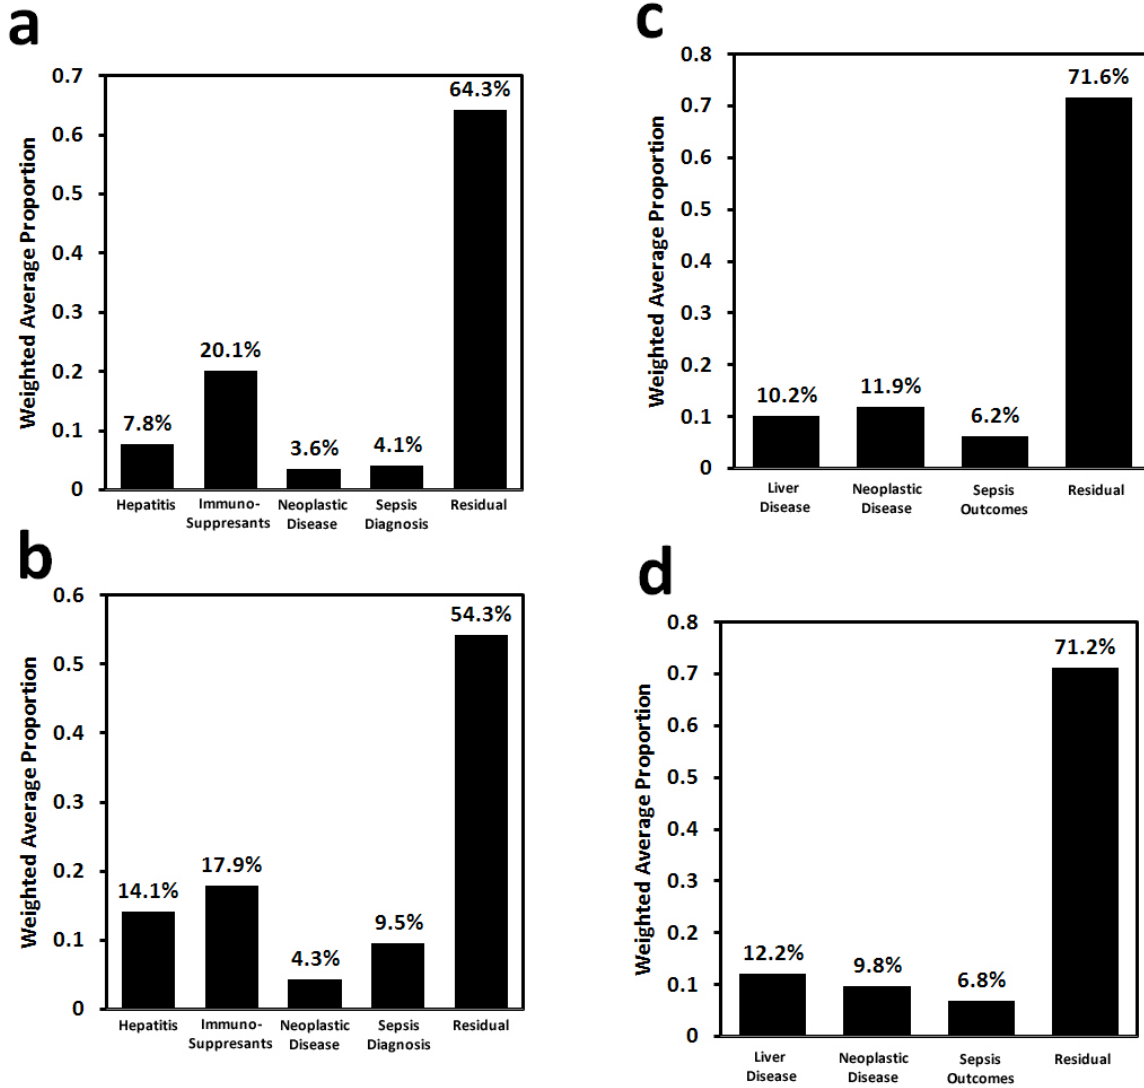

**Figure S15. Principle components of variance of plasma proteins in sepsis diagnosis and sepsis outcomes.** Principle components of variance (left panels) in sepsis diagnosis (SIRS controls with sepsis survivors) at  $t_0$  (a) and  $t_{24}$  (b) and sepsis outcome (sepsis survivors and sepsis nonsurvivor) at  $t_0$  (c) and  $t_{24}$  (d). Sepsis Diagnosis:  $t_0$  &  $t_{24}$ , FDR = 10%. Sepsis Outcomes:  $t_0$ , FDR = 5%;  $t_{24}$ , FDR = 10%.

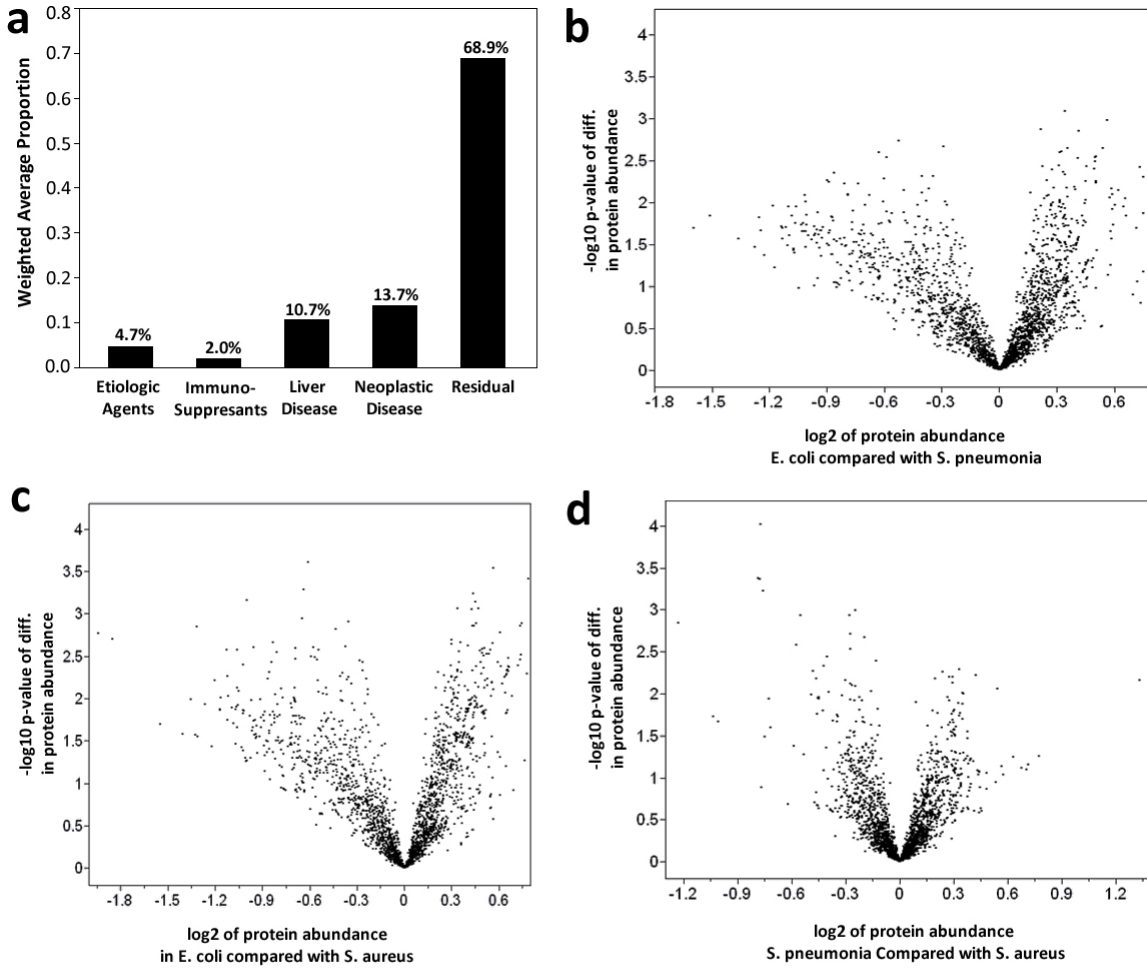

**Figure S16: Principal components and Volcano plots of plasma protein variation associated with etiologic agents.** **a**) Principal components of variance decomposition (with Pearson product-moment correlation) for etiologic agents and clinical parameters. Volcano plots of FDR corrected (5%) ANOVAs (with non-hypothesis components of variance as fixed effects) indicate no significant differences between host proteomic response to bacteremia with *E. coli* (n=16) and *S. pneumoniae*, n=31, **b**), *E. coli* and *S. aureus* (n=27, **c**), and *S. pneumoniae* and *S. aureus* (**d**).



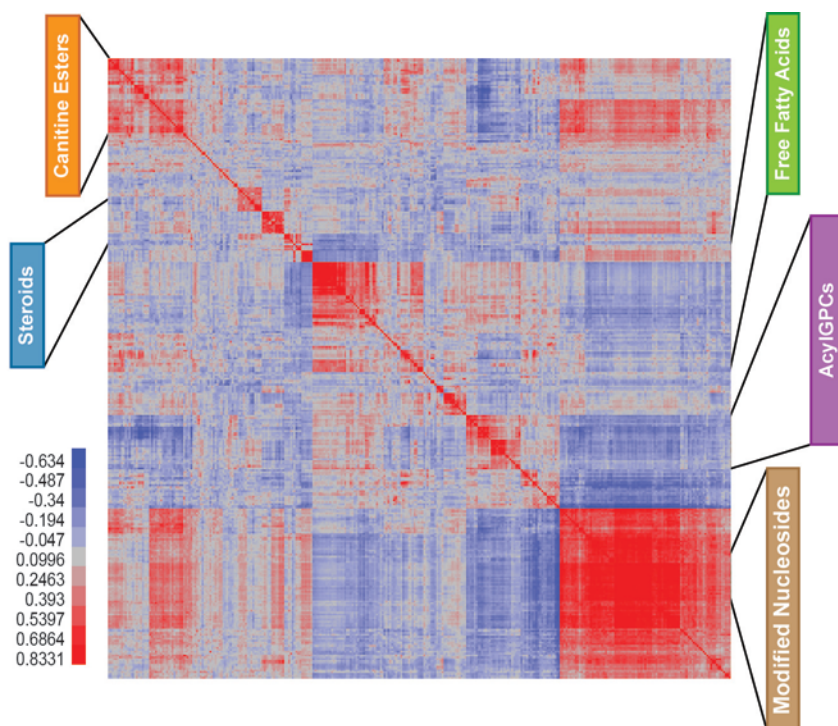

| Canitine Esters                                                                                                                                                                                                                                                                                                                                                                                                                                                                                                                                                                                                                                                  | Steroids                                                                                                                                                                                                                                                 | Free Fatty Acids                                                                                                                                                                                                                                                                                                                                                                                                                                                                                   | AcylGPCs                                                                                                                                                                                                                                                             |
|------------------------------------------------------------------------------------------------------------------------------------------------------------------------------------------------------------------------------------------------------------------------------------------------------------------------------------------------------------------------------------------------------------------------------------------------------------------------------------------------------------------------------------------------------------------------------------------------------------------------------------------------------------------|----------------------------------------------------------------------------------------------------------------------------------------------------------------------------------------------------------------------------------------------------------|----------------------------------------------------------------------------------------------------------------------------------------------------------------------------------------------------------------------------------------------------------------------------------------------------------------------------------------------------------------------------------------------------------------------------------------------------------------------------------------------------|----------------------------------------------------------------------------------------------------------------------------------------------------------------------------------------------------------------------------------------------------------------------|
| Acetylcarnitine<br>X-12465<br>Butyrylcarnitine<br>Decanoylcarnitine<br>Octanoylcarnitine<br>Hexanoylcarnitine<br>HPLA<br>Malate<br>Xanthine<br>β-hydroxyisovalerate<br>Isovalerylcarnitine<br>Phenylalanine<br>Propionylcarnitine<br>X-11381<br>Aspartate<br>Glutamate<br>Lysine<br>Ornithine<br>Serine<br>X-12051<br>X-12422<br>X-12660<br>Choline<br>Cysteine<br>Phosphate<br>Scyllo-inositol<br>3-dehydrocarnitine<br>Urate<br>X-10439<br>Deoxycarnitine<br>X-12458<br>X-04595<br>X-11421<br>X-11521<br>1-methoxyadenosine<br>3-hydroxy-2-ethylpropionate<br>Hydroxyisovalerylcarnitine<br>2-methylbutyrylcarnitine<br>Isobutyrylcarnitine<br>tiglylcarnitine | Cholesterol<br>Glycerol-3-phosphate<br>X-030904<br>X-06346<br>X-05907<br>X-10395<br>X-08402<br>X-10510<br>X-10744<br>X-10500<br>Androsteron sulfate<br>Epiandrosteron sulfate<br>X-11273<br>DHEAS<br>X-11302<br>X-11244<br>X-11443<br>X-11245<br>X-11445 | Adrenate<br>Docosahexaenoate<br>Docosapentaenoate<br>Dihomolinoleate<br>Palmitate<br>10-heptadecenoate<br>Eicosenoate<br>10-nonadecenoate<br>Oleate<br>Linolenate<br>Margate<br>Stearate<br>Laurate<br>Myristate<br>Myristoleate<br>Palmitoleate<br>X-12442<br>AHB<br>2-hydroxystereate<br>7-HOCA<br>2-hydroxypalmitate<br>5-dodecenoate<br>X-11809<br>X-12990<br>Biliverdin<br>X-01327<br>X-11793<br>Arachidonate<br>Dihomolinolenate<br>Caprate<br>Caprylate<br>Eicosapentaenoate<br>Steridonate | 1-arichdoyl-GPC<br>1-linoleoyl-GPC<br>1-oleoyl-GPC<br>1-eicostrienoyl-GPC<br>1-palmitoleoyl-GPC<br>1-palmioyl-GPC<br>1-stearoyl-GPC<br>2-palmitoyl-GPC<br>1-archidoyl-GPC<br>X-12644<br>Uridine<br>1-arachidoyl-GPI<br>1-oleoyl-GPE<br>X-11317<br>X-12038<br>X-11550 |
|                                                                                                                                                                                                                                                                                                                                                                                                                                                                                                                                                                                                                                                                  |                                                                                                                                                                                                                                                          |                                                                                                                                                                                                                                                                                                                                                                                                                                                                                                    | Modified Nucleosides                                                                                                                                                                                                                                                 |
|                                                                                                                                                                                                                                                                                                                                                                                                                                                                                                                                                                                                                                                                  |                                                                                                                                                                                                                                                          |                                                                                                                                                                                                                                                                                                                                                                                                                                                                                                    | Arabitol<br>Erythronate<br>Erythritol<br>Pseudouridine<br>X-03951<br>X-11423<br>X-04507<br>4-acetamidobutanoate<br>X-11687<br>N2,N2-dimethylguanosine<br>N6-carbamoylthreonyl-adenosine<br>1-methylimidazoleacetate                                                  |

**Figure S17. Metabolomic cross correlation analysis with list of significant metabolite clusters.** Heatmap of hierarchical clustering of pairwise Pearson product-moment correlations of 332 log-transformed, annotated plasma metabolites in 132 subjects at  $t_0$  compared to matched subjects at  $t_{24}$ . Positive correlations are red; inverse correlations are blue. Unannotated GCMS identified biochemicals were excluded from the analysis. Metabolite lists are the cluster order from top to bottom as determined by the hierarchical cluster analysis.

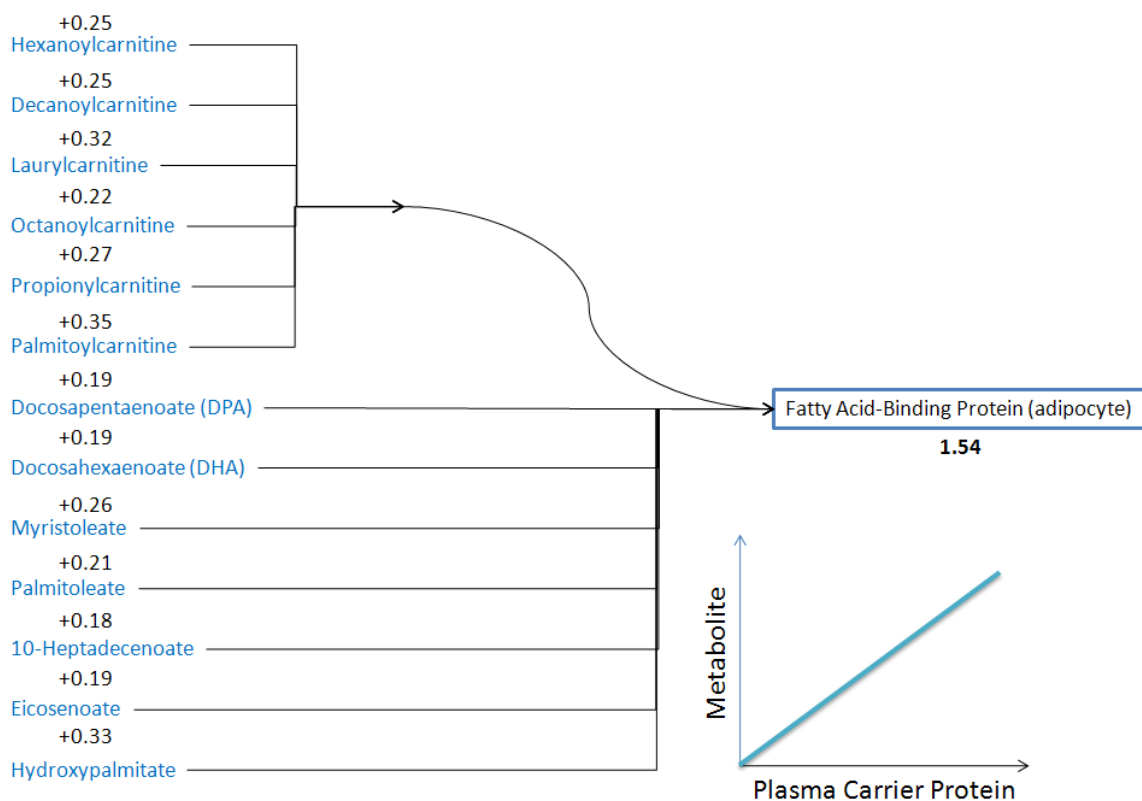

**Figure S18. Plasma metabolite correlations with Fatty Acid Binding Protein (FABP4, adipocyte), a plasma carrier protein for carnitine esters and free fatty acids.** Positive correlation coefficients of plasma metabolite values with plasma FABP4 values are indicated by black integers. Global cross correlation analysis results determined from all relevant  $t_0$  metabolites (336 biochemicals) correlated with  $t_0$  proteins (165 proteins) in 150 derivation patient samples. The analysis included lower confidence protein acyl-coA synthetase, mitochondrial 6 and single time point high confidence proteins SDHD, and fatty acid binding protein 4).

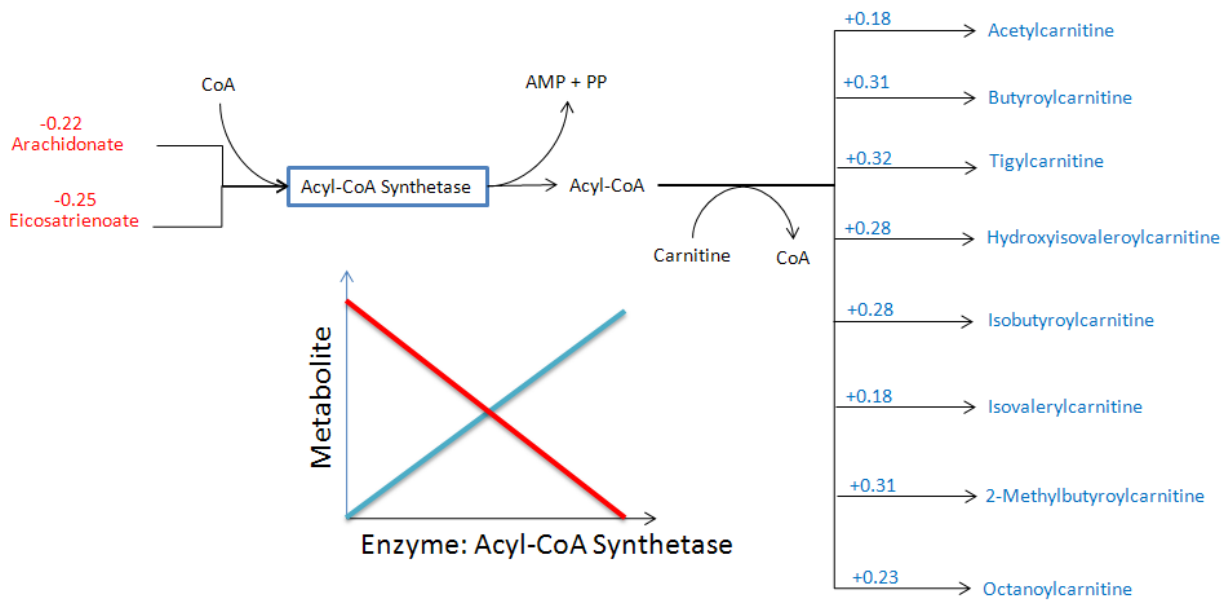

**Figure S19. Selected plasma metabolite correlations with Acyl-CoA synthetase M6.** ACSM6 was upregulated 1.33-fold in sepsis nonsurvivors compared with sepsis survival. ACSM6 attaches FA to Coenzyme A for  $\beta$ -oxidation. Esterification of carnitine commits fatty acids to  $\beta$ -oxidation. Correlation coefficients of plasma metabolite values with ACSM6 values are indicated by red (inverse correlations) or blue (positive correlations) integers. Correlation results determined from  $t_0$  metabolomics versus  $t_0$  proteomics global cross correlation analysis.

| Characteristic     | Category             | Definition                                                                                                                                                                                                                                                          |
|--------------------|----------------------|---------------------------------------------------------------------------------------------------------------------------------------------------------------------------------------------------------------------------------------------------------------------|
| a) Infection       | 1 - Confirmed        | Infection, clinical evidence of infection, no evidence of non-infectious process, etiologic agent identified                                                                                                                                                        |
|                    | 2 - Probable         | Infection, clinical evidence of infection, no evidence of non-infectious process, etiologic agent not identified                                                                                                                                                    |
|                    | 3 - Unknown          | Indeterminate, infection possible                                                                                                                                                                                                                                   |
|                    | 4 – Negative         | No infection, no evidence of infection                                                                                                                                                                                                                              |
|                    | 5 – Negative         | No infection, evidence of non-infectious disease process                                                                                                                                                                                                            |
| b) Etiologic agent | 1 – Definite         | At least a single positive blood culture in a sample drawn within 72 hours of enrollment for <i>Staphylococcus aureus</i> , Gram-negative bacteria, <i>Candida spp.</i> or <i>Streptococcus pneumoniae</i> .                                                        |
|                    |                      | OR two or more positive blood or CSF cultures in samples drawn within 72 hours of enrollment for any other pathogen                                                                                                                                                 |
|                    |                      | OR Positive urinary pneumococcal antigen in a sample drawn within 72 hours of enrollment BUT NOT any positive culture (blood, sputum, urine, etc.) for a sample(s) drawn within 72 hours of enrollment for a second or more organism(s).                            |
|                    |                      | OR Identification of any pathogen by culture, special staining, PCR, or antigen testing of any pathogen from any sterile body site (e.g., pleural fluid/empyema, cerebrospinal fluid, synovial fluid, bone biopsy, heart valve, deep tissue abscess; biliary fluid) |
|                    |                      | OR Identification of <i>Pneumocystis Carinii</i> in a pulmonary specimen from any patients with AIDS (absolute CD4 $\leq$ 200)                                                                                                                                      |
|                    |                      | OR seroconversion (RMSF, Ehrlichia, Bartonella, etc).                                                                                                                                                                                                               |
|                    | 2 - Probable         | At least a single positive blood or CSF culture(s) for a sample(s) drawn within 72 hours of enrollment for <i>S. aureus</i> , Gram-negative bacteria, <i>Candida spp.</i> , or <i>S. pneumoniae</i> .                                                               |
|                    |                      | OR two or more positive blood or CSF cultures in samples drawn within 72 hours of enrollment for any other pathogen                                                                                                                                                 |
|                    |                      | OR positive urinary pneumococcal antigen in a sample drawn within 72 hours of enrollment AND at least one positive culture (blood, sputum, urine etc) in a sample drawn within 72 hours of enrollment for a second or more organism(s).                             |
|                    | 3 – Complex etiology | NO positive blood or CSF culture(s) for a sample(s) drawn within 72 hours of enrollment for <i>S. aureus</i> , Gram-negative bacteria, <i>Candida spp.</i> , or <i>S. pneumoniae</i> .                                                                              |
|                    |                      | AND NO two or more positive blood or CSF cultures in samples drawn within 72 hours of enrollment for any other pathogen                                                                                                                                             |
|                    |                      | AND NO positive urinary pneumococcal antigen in a sample drawn within 72 hours of enrollment                                                                                                                                                                        |
|                    |                      | AND another positive culture(s) (sputum, urine, broncho-alveolar lavage, skin, wound etc) in a sample(s) drawn within 72 hours of enrollment for one or more organism(s).                                                                                           |
|                    | 4 – Not known        | NO positive culture for any sample(s) drawn within 72 hours of enrollment for any organism(s).                                                                                                                                                                      |

**Table S1. Clinical Adjudication Guidelines**

| Estimated Glomerular Filtration Rate | N <sup>1</sup> | Non-infected SIRS-Positive | Uncomplicated Sepsis | Severe Sepsis | Septic Shock | Sepsis nonsurvivor |
|--------------------------------------|----------------|----------------------------|----------------------|---------------|--------------|--------------------|
| >74 ml/min                           | 45             | 13.3%                      | 26.7%                | 15.6%         | 24.4%        | 20%                |
| 32-74 ml/min                         | 54             | 27.8%                      | 20.4%                | 14.8%         | 16.7%        | 20%                |
| 0-31 ml/min                          | 28             | 17.9%                      | 3.6%                 | 10.7%         | 35.7%        | 32.1%              |
| Chronic hemodialysis                 | 22             | 13.6%                      | 13.6%                | 36.4%         | 27.3%        | 9.1%               |

<sup>1</sup>One patient did not have a recorded eGFR and was excluded from the analysis.

**Table S2. Partial overlap of eGFR group and Sepsis group membership.**

**Table S3. Plasma Metabolite concentrations in non-infected SIRS, sepsis survivors and sepsis nonsurvivors.** Average, log-transformed, scaled, plasma metabolite concentrations. SIRS-positive patients, sepsis survivors and nonsurviving sepsis at t0 and t24 in discovery and replication cohorts, showing significant differences from sepsis survivors by weighted ANOVAs (denoted \*) with 5% FDR (t0 and t24 derivation samples), 25% FDR (t0 validation) or 15% FDR (t24 validation samples).

| Biochemical                        | t0 SIRS+     | t0 Sepsis Survivors | t0 sepsis nonsurvivor | t24 SIRS+    | t24 Sepsis Survivors | t24 sepsis nonsurvivor | validation t0 Sepsis Survivors | Validation t0 sepsis nonsurvivor | Validation t24 Sepsis Survivors | Validation t24 sepsis nonsurvivor | PLATFORM  | KEGG ID  | HMDB ID   |
|------------------------------------|--------------|---------------------|-----------------------|--------------|----------------------|------------------------|--------------------------------|----------------------------------|---------------------------------|-----------------------------------|-----------|----------|-----------|
| 1,5-anhydroglucitol                | 0.95 ± 0.11  | 0.90 ± 0.06         | 0.83 ± 0.08           | 1.06 ± 0.10  | 0.92 ± 0.07          | 0.78 ± 0.08            | 0.73 ± 0.10                    | 1.07 ± 0.13*                     | 0.93 ± 0.13                     | 1.14 ± 0.17                       | LC/MS neg | C07326   | HMDB02712 |
| 1,6-anhydroglucose                 | 1.34 ± 0.47  | 1.21 ± 0.27         | 0.97 ± 0.20           | N/D          | N/D                  | N/D                    | 1.36 ± 0.33                    | 1.75 ± 0.51                      | 1.32 ± 0.36                     | 1.24 ± 0.37                       | GC/MS     |          | HMDB00640 |
| 10-heptadecenoate                  | 1.24 ± 0.13  | 1.12 ± 0.08         | 1.21 ± 0.10           | 1.15 ± 0.08  | 0.98 ± 0.04          | 1.17 ± 0.10            | 0.99 ± 0.08                    | 1.02 ± 0.12                      | 1.01 ± 0.11                     | 1.10 ± 0.15                       | LC/MS neg |          |           |
| 10-nonadecenoate                   | 1.25 ± 0.13  | 1.05 ± 0.08         | 1.34 ± 0.16           | 1.25 ± 0.17  | 1.03 ± 0.06          | 1.47 ± 0.19            | 0.95 ± 0.08                    | 1.04 ± 0.09                      | 1.04 ± 0.12                     | 1.30 ± 0.24                       | LC/MS neg |          |           |
| 1-arachidoyl-GPC                   | 1.42 ± 0.21  | 1.08 ± 0.11         | 1.03 ± 0.24           | 1.66 ± 0.20* | 1.05 ± 0.13          | 0.55 ± 0.10*           | 1.29 ± 0.17                    | 0.69 ± 0.12                      | 1.36 ± 0.17                     | 0.79 ± 0.17                       | LC/MS pos | (C05208) |           |
| 1-arachidoyl-GPE                   | 1.59 ± 0.19* | 0.96 ± 0.08         | 0.90 ± 0.15           | 1.93 ± 0.20* | 1.22 ± 0.10          | 0.66 ± 0.08*           | 1.02 ± 0.08                    | 0.99 ± 0.13                      | 1.02 ± 0.09                     | 0.97 ± 0.15                       | LC/MS neg |          |           |
| 1-arachidoyl-GPI                   | 1.10 ± 0.09  | 1.04 ± 0.07         | 0.93 ± 0.14           | 1.25 ± 0.11  | 0.99 ± 0.06          | 0.83 ± 0.07            | 1.26 ± 0.14                    | 1.11 ± 0.18                      | 1.13 ± 0.08                     | 1.06 ± 0.13                       | LC/MS neg | (C03819) |           |
| 1-docosahexaenoyl-GPC              | N/D          | N/D                 | N/D                   | N/D          | N/D                  | N/D                    | 1.44 ± 0.26                    | 0.83 ± 0.16                      | 1.32 ± 0.14                     | 1.02 ± 0.15                       | LC/MS pos |          |           |
| 1-eicosadienoyl-GPC                | N/D          | N/D                 | N/D                   | N/D          | N/D                  | N/D                    | 1.09 ± 0.14                    | 0.76 ± 0.12                      | 0.90 ± 0.09                     | 0.70 ± 0.09                       | LC/MS pos |          |           |
| 1-eicosatrienoyl-GPC               | 0.90 ± 0.12  | 0.82 ± 0.09         | 0.62 ± 0.12           | 2.00 ± 0.31* | 1.11 ± 0.17          | 0.38 ± 0.06*           | 1.22 ± 0.14                    | 0.78 ± 0.21                      | 1.31 ± 0.19                     | 0.73 ± 0.17                       | LC/MS pos |          |           |
| 1-heptadecanoyl-GPC                | N/D          | N/D                 | N/D                   | N/D          | N/D                  | N/D                    | 1.16 ± 0.17                    | 0.72 ± 0.15                      | 0.93 ± 0.12                     | 0.68 ± 0.12                       | LC/MS pos |          |           |
| 1-linoleoyl-GPC                    | 1.92 ± 0.27  | 1.43 ± 0.16         | 1.20 ± 0.25           | 2.20 ± 0.26* | 1.19 ± 0.14          | 0.67 ± 0.12            | 1.19 ± 0.14                    | 0.73 ± 0.13                      | 1.35 ± 0.18                     | 0.91 ± 0.20                       | LC/MS pos | C04100   |           |
| 1-linoleoyl-GPE                    | N/D          | N/D                 | N/D                   | 2.23 ± 0.29* | 1.40 ± 0.17          | 0.73 ± 0.10*           | N/D                            | N/D                              | 1.18 ± 0.16                     | 1.04 ± 0.18                       | LC/MS neg |          |           |
| 1-linoleoyl-GPI                    | N/D          | N/D                 | N/D                   | N/D          | N/D                  | N/D                    | 0.88 ± 0.10                    | 0.95 ± 0.17                      | N/D                             | N/D                               | LC/MS neg | (C03819) |           |
| 1-methyladenosine                  | 1.01 ± 0.07  | 0.98 ± 0.03         | 1.18 ± 0.07*          | 0.95 ± 0.05  | 1.04 ± 0.03          | 1.18 ± 0.05*           | 0.99 ± 0.05                    | 1.16 ± 0.08                      | 0.99 ± 0.04                     | 1.13 ± 0.09                       | LC/MS pos | C02494   | HMDB03331 |
| 1-methylimidazoleacetate           | 0.80 ± 0.19  | 1.23 ± 0.21         | 1.79 ± 0.44*          | 0.84 ± 0.20  | 1.27 ± 0.23          | 1.97 ± 0.28*           | 1.05 ± 0.20                    | 1.51 ± 0.50                      | 1.43 ± 0.37                     | 1.87 ± 0.66                       | LC/MS pos | C05828   | HMDB02820 |
| 1-methylurate                      | N/D          | N/D                 | N/D                   | 0.84 ± 0.20  | 1.22 ± 0.19          | 1.49 ± 0.25*           | 1.16 ± 0.20                    | 1.26 ± 0.36                      | 1.09 ± 0.23                     | 1.09 ± 0.34                       | LC/MS pos |          | HMDB03099 |
| 1-myristoyl-GPC                    | N/D          | N/D                 | N/D                   | 1.10 ± 0.13* | 0.76 ± 0.05          | 0.59 ± 0.05            | 1.14 ± 0.13                    | 0.68 ± 0.17                      | N/D                             | N/D                               | LC/MS pos |          |           |
| 1-oleoylglycerol                   | N/D          | N/D                 | N/D                   | N/D          | N/D                  | N/D                    | 0.75 ± 0.10                    | 0.80 ± 0.31                      | 1.20 ± 0.23                     | 1.14 ± 0.40                       | LC/MS pos | (C01885) |           |
| 1-oleoylglycerophosphate           | N/D          | N/D                 | N/D                   | 1.62 ± 0.16* | 1.00 ± 0.10          | 0.80 ± 0.12            | N/D                            | N/D                              | 1.12 ± 0.10                     | 0.90 ± 0.15                       | LC/MS neg |          | HMDB00443 |
| 1-oleoyl-GPC                       | 1.67 ± 0.18* | 1.21 ± 0.12         | 1.30 ± 0.26           | 1.98 ± 0.20* | 1.14 ± 0.11          | 0.74 ± 0.12            | 1.09 ± 0.12                    | 0.81 ± 0.15                      | 1.30 ± 0.14                     | 0.75 ± 0.13                       | LC/MS pos | C03916   | HMDB02815 |
| 1-oleoyl-GPE                       | 1.06 ± 0.15  | 0.93 ± 0.08         | 0.87 ± 0.15           | 1.52 ± 0.25  | 1.07 ± 0.17          | 0.64 ± 0.09            | 1.14 ± 0.13                    | 1.05 ± 0.15                      | 1.24 ± 0.14                     | 1.05 ± 0.16                       | LC/MS neg |          |           |
| 1-palmitoleoyl-GPC                 | 1.43 ± 0.20* | 0.94 ± 0.12         | 0.73 ± 0.16           | 1.44 ± 0.14* | 1.00 ± 0.11          | 0.70 ± 0.12            | 1.44 ± 0.19                    | 0.74 ± 0.13                      | 1.33 ± 0.19                     | 0.88 ± 0.14                       | LC/MS pos |          |           |
| 1-palmitoleoyl-GPI                 | N/D          | N/D                 | N/D                   | N/D          | N/D                  | N/D                    | 1.26 ± 0.22                    | 0.91 ± 0.17                      | N/D                             | N/D                               | LC/MS neg | (C03819) |           |
| 1-palmitoylglycerol                | 1.18 ± 0.09  | 1.19 ± 0.07         | 1.21 ± 0.19           | 2.82 ± 1.51  | 1.25 ± 0.16          | 0.71 ± 0.08            | N/D                            | N/D                              | N/D                             | N/D                               | GC/MS     |          |           |
| 1-palmitoyl-GPC                    | 1.80 ± 0.17* | 1.17 ± 0.09         | 0.99 ± 0.18           | 1.89 ± 0.17* | 1.10 ± 0.08          | 0.76 ± 0.11*           | 1.07 ± 0.09                    | 0.73 ± 0.12                      | 1.25 ± 0.12                     | 0.64 ± 0.11*                      | LC/MS pos | C04102   |           |
| 1-palmitoyl-GPE                    | N/D          | N/D                 | N/D                   | N/D          | N/D                  | N/D                    | 1.17 ± 0.12                    | 0.95 ± 0.12                      | 1.38 ± 0.15                     | 1.16 ± 0.20                       | LC/MS neg |          |           |
| 1-palmitoyl-GPI                    | N/D          | N/D                 | N/D                   | N/D          | N/D                  | N/D                    | 1.62 ± 0.30                    | 1.45 ± 0.37                      | N/D                             | N/D                               | LC/MS neg | (C03819) |           |
| 1-stearoylglycerol                 | 1.10 ± 0.08  | 0.97 ± 0.05         | 0.91 ± 0.07           | 0.90 ± 0.12  | 0.91 ± 0.07          | 0.71 ± 0.11            | 0.90 ± 0.08                    | 0.74 ± 0.07                      | 1.06 ± 0.11                     | 0.89 ± 0.09                       | GC/MS     | (C01885) |           |
| 1-stearoyl-GPC                     | 1.99 ± 0.27  | 1.46 ± 0.16         | 1.27 ± 0.24           | 1.92 ± 0.17* | 1.07 ± 0.09          | 0.70 ± 0.13*           | 1.28 ± 0.19                    | 0.79 ± 0.16                      | 1.38 ± 0.16                     | 0.71 ± 0.13*                      | LC/MS pos |          |           |
| 1-stearoyl-GPE                     | N/D          | N/D                 | N/D                   | N/D          | N/D                  | N/D                    | 0.82 ± 0.10                    | 0.63 ± 0.10                      | N/D                             | N/D                               | LC/MS pos |          |           |
| 1-stearoyl-GPI                     | 1.09 ± 0.11  | 0.97 ± 0.07         | 1.24 ± 0.21           | N/D          | N/D                  | N/D                    | 1.26 ± 0.17                    | 1.23 ± 0.22                      | 1.24 ± 0.12                     | 1.41 ± 0.21                       | LC/MS neg | (C03819) |           |
| 2-aminobutyrate                    | 1.43 ± 0.23  | 1.18 ± 0.10         | 1.12 ± 0.13           | 1.66 ± 0.25  | 1.18 ± 0.10          | 1.01 ± 0.13            | 1.13 ± 0.14                    | 1.24 ± 0.26                      | 1.24 ± 0.12                     | 1.24 ± 0.26                       | GC/MS     | C02261   | HMDB00452 |
| 2-arachidonoyl-GPE                 | N/D          | N/D                 | N/D                   | N/D          | N/D                  | N/D                    | 1.07 ± 0.12                    | 0.98 ± 0.15                      | 0.83 ± 0.09                     | 0.76 ± 0.10                       | LC/MS neg |          |           |
| 2-hydroxyacetaminophen sulfate     | 0.77 ± 0.21  | 1.05 ± 0.13         | 0.67 ± 0.17           | 0.35 ± 0.17* | 1.79 ± 0.34          | 1.51 ± 0.41            | 1.82 ± 0.39                    | 0.89 ± 0.25                      | 1.70 ± 0.43                     | 0.91 ± 0.33                       | LC/MS neg |          |           |
| 2-hydroxybutyrate                  | 1.39 ± 0.23  | 1.13 ± 0.09         | 1.39 ± 0.13           | 1.16 ± 0.16  | 1.18 ± 0.08          | 1.64 ± 0.21            | 1.29 ± 0.23                    | 1.20 ± 0.19                      | 1.10 ± 0.11                     | 1.18 ± 0.19                       | GC/MS     | C05984   | HMDB00008 |
| 2-hydroxyhippurate                 | N/D          | N/D                 | N/D                   | N/D          | N/D                  | N/D                    | 2.20 ± 0.96                    | 1.26 ± 0.52                      | N/D                             | N/D                               | LC/MS neg | C07588   | HMDB00840 |
| 2-hydroxypalmitate                 | 1.15 ± 0.07  | 1.13 ± 0.06         | 1.58 ± 0.24           | 1.33 ± 0.19  | 1.14 ± 0.09          | 1.51 ± 0.20            | 1.09 ± 0.12                    | 1.33 ± 0.14                      | 0.99 ± 0.06                     | 1.22 ± 0.17                       | LC/MS neg |          |           |
| 2-hydroxystearate                  | 1.19 ± 0.09  | 1.15 ± 0.08         | 1.20 ± 0.17           | 1.23 ± 0.15  | 1.08 ± 0.08          | 1.16 ± 0.12            | 1.16 ± 0.12                    | 1.20 ± 0.14                      | 0.99 ± 0.06                     | 1.08 ± 0.11                       | LC/MS neg | C03045   |           |
| 2-linoleoyl-GPC                    | N/D          | N/D                 | N/D                   | N/D          | N/D                  | N/D                    | 1.04 ± 0.16                    | 0.42 ± 0.10                      | 0.89 ± 0.10                     | 0.73 ± 0.12                       | LC/MS pos |          |           |
| 2-methoxyacetaminophen glucuronide | N/D          | N/D                 | N/D                   | N/D          | N/D                  | N/D                    | 1.79 ± 0.53                    | 0.73 ± 0.17                      | N/D                             | N/D                               | LC/MS pos |          |           |
| 2-methoxyacetaminophen sulfate     | 0.64 ± 0.21  | 1.11 ± 0.14         | 0.75 ± 0.25           | 0.16 ± 0.05* | 1.48 ± 0.17          | 0.98 ± 0.30            | 1.62 ± 0.43                    | 0.93 ± 0.25                      | 1.59 ± 0.39                     | 1.00 ± 0.32                       | LC/MS neg |          |           |
| 2-methylbutyrylcarnitine           | 1.46 ± 0.32  | 1.01 ± 0.11         | 2.05 ± 0.40*          | 1.13 ± 0.24  | 1.00 ± 0.10          | 2.12 ± 0.47*           | 1.17 ± 0.14                    | 1.50 ± 0.35                      | 1.07 ± 0.10                     | 1.41 ± 0.30                       | LC/MS pos |          | HMDB00378 |
| 2-octenoylcarnitine                | N/D          | N/D                 | N/D                   | 0.77 ± 0.11  | 0.79 ± 0.06          | 1.47 ± 0.23*           | N/D                            | N/D                              | 0.60 ± 0.06                     | 1.01 ± 0.20*                      | LC/MS pos |          |           |
| 2-oleoyl-GPC                       | N/D          | N/D                 | N/D                   | N/D          | N/D                  | N/D                    | 0.96 ± 0.09                    | 0.79 ± 0.11                      | 1.12 ± 0.16                     | 0.84 ± 0.13                       | LC/MS pos |          |           |
| 2-palmitoyl-GPC                    | 1.26 ± 0.17* | 0.85 ± 0.07         | 0.76 ± 0.14           | 1.72 ± 0.18* | 0.91 ± 0.09          | 0.70 ± 0.12            | 1.14 ± 0.14                    | 0.74 ± 0.15                      | 1.37 ± 0.15                     | 0.74 ± 0.13*                      | LC/MS pos |          |           |

| Biochemical                                   | t0 SIRS+     | t0 Sepsis Survivors | t0 sepsis nonsurvivor | t24 SIRS+    | t24 Sepsis Survivors | t24 sepsis nonsurvivor | validation t0 Sepsis Survivors | Validation t0 sepsis nonsurvivor | Validation t24 Sepsis Survivors | Validation t24 sepsis nonsurvivor | PLATFORM  | KEGG ID          | HMDB ID                |
|-----------------------------------------------|--------------|---------------------|-----------------------|--------------|----------------------|------------------------|--------------------------------|----------------------------------|---------------------------------|-----------------------------------|-----------|------------------|------------------------|
| 2-stearoyl-GPC                                | N/D          | N/D                 | N/D                   | 1.48 ± 0.15* | 1.19 ± 0.30          | 0.52 ± 0.08*           | 1.19 ± 0.16                    | 0.64 ± 0.11                      | 1.20 ± 0.14                     | 0.75 ± 0.13                       | LC/MS pos |                  |                        |
| 3-(4-hydroxyphenyl)lactate                    | 2.48 ± 0.72  | 1.26 ± 0.13         | 3.21 ± 0.61*          | 1.48 ± 0.29  | 1.04 ± 0.10          | 3.47 ± 0.96*           | 1.15 ± 0.16                    | 1.75 ± 0.47                      | 1.11 ± 0.18                     | 1.83 ± 0.48                       | LC/MS neg | C03672           | HMDB00755              |
| 3-(cystein-S-yl)acetaminophen                 | 0.68 ± 0.22  | 1.28 ± 0.17         | 1.41 ± 0.43           | 0.25 ± 0.14* | 2.00 ± 0.37          | 1.41 ± 0.63            | 1.48 ± 0.29                    | 0.73 ± 0.22                      | 2.93 ± 0.64                     | 1.81 ± 0.63                       | LC/MS pos |                  |                        |
| 3-aminoisobutyrate                            | N/D          | N/D                 | N/D                   | N/D          | N/D                  | N/D                    | N/D                            | N/D                              | 1.29 ± 0.61                     | 1.51 ± 0.55                       | GC/MS     | C05145<br>C03284 | HMDB03911              |
| 3-carboxy-4-methyl-5-propyl-2-furanpropanoate | 1.88 ± 0.40  | 2.38 ± 0.51         | 1.63 ± 0.58           | 2.55 ± 0.81  | 2.49 ± 0.63          | 1.76 ± 0.56            | 3.55 ± 0.97                    | 1.57 ± 0.61                      | 2.74 ± 0.82                     | 1.14 ± 0.47                       | LC/MS neg |                  |                        |
| 3-dehydrocarnitine                            | 1.26 ± 0.11  | 1.18 ± 0.10         | 1.43 ± 0.22           | 0.98 ± 0.10  | 1.09 ± 0.08          | 1.33 ± 0.17            | 0.97 ± 0.13                    | 1.61 ± 0.30                      | 1.13 ± 0.13                     | 1.47 ± 0.19                       | LC/MS pos | C02636           |                        |
| 3-hydroxy-2-ethylpropionate                   | 0.80 ± 0.10  | 0.82 ± 0.07         | 1.32 ± 0.20*          | 0.80 ± 0.10  | 0.74 ± 0.06          | 1.26 ± 0.26*           | 0.59 ± 0.10                    | 0.76 ± 0.13                      | 0.62 ± 0.06                     | 0.94 ± 0.17                       | GC/MS     |                  | HMDB00396              |
| 3-hydroxybutyrate                             | 1.99 ± 0.52  | 1.97 ± 0.28         | 1.85 ± 0.32           | 1.54 ± 0.39  | 2.80 ± 0.62          | 2.98 ± 0.57            | 1.88 ± 0.68                    | 1.17 ± 0.23                      | 2.60 ± 0.74                     | 1.70 ± 0.55                       | GC/MS     | C01089           | HMDB00357              |
| 3-hydroxydecanoate                            | N/D          | N/D                 | N/D                   | 1.03 ± 0.16  | 0.86 ± 0.05          | 1.97 ± 0.46*           | 0.79 ± 0.07                    | 0.87 ± 0.13                      | N/D                             | N/D                               | LC/MS neg |                  | HMDB02203              |
| 3-hydroxisobutyrate                           | N/D          | N/D                 | N/D                   | N/D          | N/D                  | N/D                    | 1.21 ± 0.18                    | 1.00 ± 0.15                      | 1.51 ± 0.35                     | 1.58 ± 0.29                       | LC/MS pos | C01188<br>C06001 | HMDB00336<br>HMDB00023 |
| 3-hydroxykynurenine                           | N/D          | N/D                 | N/D                   | N/D          | N/D                  | N/D                    | N/D                            | N/D                              | 1.15 ± 0.27                     | 1.34 ± 0.42                       | LC/MS pos | C02794           | HMDB00732              |
| 3-hydroxyoctanoate                            | N/D          | N/D                 | N/D                   | N/D          | N/D                  | N/D                    | 0.88 ± 0.09                    | 0.98 ± 0.20                      | 0.81 ± 0.14                     | 1.15 ± 0.38                       | LC/MS neg |                  | HMDB01954              |
| 3-indoxyl sulfate                             | 1.45 ± 0.28  | 2.00 ± 0.31         | 1.72 ± 0.40           | 1.29 ± 0.27  | 2.07 ± 0.39          | 2.19 ± 0.46*           | 2.09 ± 0.47                    | 2.04 ± 0.52                      | 1.39 ± 0.23                     | 1.15 ± 0.21                       | LC/MS neg |                  | HMDB00682              |
| 3-methoxytyrosine                             | 0.95 ± 0.09  | 0.81 ± 0.05         | 5.57 ± 4.14*          | 1.13 ± 0.11  | 0.96 ± 0.06          | 2.41 ± 0.81*           | 1.14 ± 0.14                    | 1.15 ± 0.16                      | 1.09 ± 0.11                     | 1.16 ± 0.19                       | LC/MS pos |                  | HMDB01434              |
| 3-methyl-2-oxobutyrate                        | 1.18 ± 0.09  | 1.07 ± 0.05         | 1.01 ± 0.09           | 1.04 ± 0.05  | 1.06 ± 0.04          | 1.07 ± 0.08            | 1.07 ± 0.06                    | 0.96 ± 0.06                      | 0.99 ± 0.06                     | 0.92 ± 0.06                       | LC/MS neg | C00141           | HMDB00019              |
| 3-methyl-2-oxovalerate                        | 1.38 ± 0.13* | 1.00 ± 0.06         | 1.02 ± 0.12           | 1.26 ± 0.07  | 1.07 ± 0.05          | 0.80 ± 0.09*           | 1.08 ± 0.10                    | 0.95 ± 0.13                      | 1.17 ± 0.08                     | 0.85 ± 0.10                       | LC/MS neg | C00671           | HMDB03736              |
| 3-methylhistidine                             | 1.37 ± 0.33  | 1.06 ± 0.15         | 0.60 ± 0.21           | 3.08 ± 0.76* | 1.17 ± 0.20          | 0.57 ± 0.13            | 1.21 ± 0.30                    | 0.60 ± 0.18                      | 2.02 ± 0.69                     | 0.72 ± 0.31                       | LC/MS neg | C01152           | HMDB00001              |
| 4-acetamidobutanoate                          | 1.76 ± 0.48  | 2.91 ± 0.48         | 3.26 ± 1.01           | 1.56 ± 0.52  | 2.39 ± 0.54          | 2.65 ± 0.52*           | 1.97 ± 0.42                    | 3.81 ± 1.28                      | 2.16 ± 0.48                     | 4.00 ± 1.30                       | LC/MS pos | C02946           | HMDB03681              |
| 4-acetamidophenol                             | 0.56 ± 0.28* | 1.48 ± 0.18         | 0.63 ± 0.21*          | 0.22 ± 0.07* | 2.00 ± 0.27          | 0.94 ± 0.37*           | 1.12 ± 0.17                    | 0.89 ± 0.28                      | 2.47 ± 0.60                     | 1.25 ± 0.46                       | LC/MS pos | C06804           | HMDB01859              |
| 4-acetaminophen sulfate                       | 0.74 ± 0.20  | 1.22 ± 0.15         | 0.84 ± 0.25           | 0.46 ± 0.20* | 1.76 ± 0.25          | 1.11 ± 0.31            | 1.41 ± 0.40                    | 0.85 ± 0.33                      | 2.12 ± 0.49                     | 1.47 ± 0.48                       | LC/MS neg |                  |                        |
| 4-ethylphenyl sulfate                         | N/D          | N/D                 | N/D                   | N/D          | N/D                  | N/D                    | N/D                            | N/D                              | 2.46 ± 0.80                     | 1.57 ± 0.87                       | LC/MS neg |                  |                        |
| 4-hydroxyphenylacetate                        | N/D          | N/D                 | N/D                   | N/D          | N/D                  | N/D                    | N/D                            | N/D                              | 0.86 ± 0.15                     | 1.46 ± 0.58                       | LC/MS neg | C00642           | HMDB00020              |
| 4-methyl-2-oxopentanoate                      | 1.31 ± 0.14  | 1.17 ± 0.06         | 0.87 ± 0.09*          | 1.16 ± 0.09  | 1.15 ± 0.06          | 0.93 ± 0.10            | 1.28 ± 0.11                    | 0.98 ± 0.11                      | 1.18 ± 0.09                     | 0.94 ± 0.09                       | LC/MS neg | C00233           | HMDB00695              |
| 4-vinylphenol sulfate                         | 1.84 ± 0.73  | 2.57 ± 0.81         | 0.52 ± 0.11           | 2.21 ± 0.76  | 2.89 ± 1.12          | 0.79 ± 0.17            | N/D                            | N/D                              | 1.72 ± 0.77                     | 2.03 ± 0.57                       | LC/MS neg |                  |                        |
| 5-dodecanoate                                 | 1.46 ± 0.32  | 1.62 ± 0.21         | 1.66 ± 0.51           | 1.12 ± 0.10  | 1.22 ± 0.07          | 1.31 ± 0.19            | 1.04 ± 0.17                    | 1.25 ± 0.21                      | 1.48 ± 0.51                     | 2.10 ± 0.70                       | LC/MS neg |                  | HMDB00529              |
| 5-methylthioadenosine                         | N/D          | N/D                 | N/D                   | 0.83 ± 0.14  | 1.02 ± 0.10          | 1.39 ± 0.20*           | 0.98 ± 0.10                    | 1.20 ± 0.26                      | 0.74 ± 0.09                     | 0.97 ± 0.17                       | LC/MS pos | C00170           | HMDB01173              |
| 5-oxoproline                                  | 1.03 ± 0.11  | 1.26 ± 0.10         | 1.43 ± 0.21           | 1.23 ± 0.18  | 1.13 ± 0.08          | 1.36 ± 0.10            | 1.01 ± 0.05                    | 1.12 ± 0.09                      | 1.08 ± 0.12                     | 1.14 ± 0.10                       | LC/MS pos | C01879           | HMDB00267              |
| 7-alpha-hydroxy-3-oxo-4-cholestenoate         | 1.25 ± 0.22  | 1.10 ± 0.08         | 2.03 ± 0.36*          | 1.49 ± 0.27  | 1.06 ± 0.07          | 2.45 ± 0.51*           | 1.09 ± 0.11                    | 1.01 ± 0.09                      | 1.19 ± 0.12                     | 1.20 ± 0.17                       | LC/MS neg | C17337           |                        |
| acetoacetate                                  | 0.87 ± 0.22  | 1.47 ± 0.25         | 1.41 ± 0.34           | N/D          | N/D                  | N/D                    | N/D                            | N/D                              | N/D                             | N/D                               | LC/MS neg | C00164           | HMDB00060              |
| acetylcarnitine                               | 1.42 ± 0.24* | 0.94 ± 0.07         | 1.53 ± 0.14*          | 1.22 ± 0.15  | 0.99 ± 0.05          | 1.72 ± 0.19*           | 1.18 ± 0.18                    | 2.01 ± 0.55                      | 0.95 ± 0.07                     | 1.35 ± 0.25                       | LC/MS pos | C02571           | HMDB00201              |
| adenosine 5'-monophosphate                    | 1.17 ± 0.17  | 1.18 ± 0.11         | 1.05 ± 0.11           | 1.03 ± 0.17  | 1.34 ± 0.13          | 1.44 ± 0.62            | 1.14 ± 0.14                    | 0.92 ± 0.15                      | 2.43 ± 0.98                     | 1.05 ± 0.17                       | LC/MS pos | C00020           | HMDB00045              |
| adrenate                                      | 1.27 ± 0.14  | 1.09 ± 0.08         | 1.31 ± 0.17           | 1.36 ± 0.22  | 1.01 ± 0.06          | 1.30 ± 0.21            | 1.15 ± 0.08                    | 1.01 ± 0.09                      | 1.06 ± 0.09                     | 0.99 ± 0.13                       | LC/MS neg | C16527           | HMDB02226              |
| alanine                                       | 1.10 ± 0.14  | 0.96 ± 0.05         | 0.80 ± 0.07           | 1.39 ± 0.13* | 0.99 ± 0.06          | 0.85 ± 0.07            | 1.05 ± 0.10                    | 1.02 ± 0.18                      | 1.16 ± 0.10                     | 0.92 ± 0.12                       | GC/MS     | C00041           | HMDB00161              |
| allantoin                                     | 1.92 ± 0.47  | 1.43 ± 0.16         | 1.92 ± 0.26*          | 1.33 ± 0.31  | 1.13 ± 0.18          | 1.71 ± 0.29*           | N/D                            | N/D                              | N/D                             | N/D                               | GC/MS     | C02350           | HMDB00462              |
| alpha-hydroxyisovalerate                      | 2.10 ± 0.50  | 1.61 ± 0.22         | 2.42 ± 0.42           | 2.41 ± 0.62  | 1.31 ± 0.17          | 3.61 ± 1.56*           | 1.40 ± 0.27                    | 2.34 ± 0.54                      | 1.23 ± 0.23                     | 2.63 ± 0.80                       | LC/MS neg |                  | HMDB00407              |
| alpha-ketobutyrate                            | 1.05 ± 0.16  | 1.00 ± 0.08         | 1.13 ± 0.14           | 0.94 ± 0.12  | 0.86 ± 0.07          | 1.04 ± 0.13            | 1.17 ± 0.16                    | 1.02 ± 0.12                      | 1.12 ± 0.14                     | 0.97 ± 0.12                       | LC/MS neg | C00109           | HMDB00005              |
| alpha-ketoglutarate                           | 1.33 ± 0.15  | 1.12 ± 0.07         | 1.50 ± 0.28           | 1.34 ± 0.29  | 0.98 ± 0.09          | 1.34 ± 0.30            | N/D                            | N/D                              | 0.53 ± 0.09                     | 0.82 ± 0.20                       | GC/MS     | C00026           | HMDB00208              |
| alpha-tocopherol                              | 1.09 ± 0.08  | 1.04 ± 0.06         | 1.14 ± 0.09           | 1.18 ± 0.11  | 0.97 ± 0.07          | 1.11 ± 0.11            | 1.17 ± 0.13                    | 1.09 ± 0.11                      | 1.24 ± 0.13                     | 1.15 ± 0.09                       | GC/MS     | C02477           | HMDB01893              |
| androsterone sulfate                          | 1.00 ± 0.33* | 2.40 ± 0.30         | 1.40 ± 0.32           | 0.93 ± 0.27  | 2.05 ± 0.31          | 1.74 ± 0.45            | 1.49 ± 0.27                    | 1.84 ± 0.55                      | 1.36 ± 0.24                     | 1.49 ± 0.36                       | LC/MS neg | (C00523)         | HMDB02759              |
| arabinose                                     | 1.52 ± 0.38  | 1.15 ± 0.10         | 1.39 ± 0.16           | 1.07 ± 0.16  | 0.89 ± 0.07          | 1.24 ± 0.17*           | 0.99 ± 0.10                    | 1.55 ± 0.32                      | 1.06 ± 0.16                     | 1.33 ± 0.29                       | GC/MS     | C00181           | HMDB00646              |
| arabitol                                      | 1.77 ± 0.35  | 1.80 ± 0.24         | 2.08 ± 0.40*          | 1.41 ± 0.27  | 1.34 ± 0.22          | 1.82 ± 0.29*           | 1.33 ± 0.18                    | 2.23 ± 0.49                      | 1.45 ± 0.23                     | 1.90 ± 0.54                       | GC/MS     | C00474           | HMDB01851              |
| arachidonate                                  | 1.22 ± 0.08  | 1.09 ± 0.07         | 1.11 ± 0.13           | 1.43 ± 0.13  | 1.17 ± 0.08          | 1.02 ± 0.09            | 1.06 ± 0.11                    | 0.98 ± 0.13                      | 1.18 ± 0.08                     | 0.95 ± 0.12                       | LC/MS neg | C00219           | HMDB01043              |
| arginine                                      | 1.28 ± 0.10  | 1.28 ± 0.25         | 1.32 ± 0.30           | 1.28 ± 0.09  | 0.98 ± 0.06          | 0.96 ± 0.10            | 1.10 ± 0.13                    | 1.05 ± 0.10                      | 1.02 ± 0.06                     | 0.97 ± 0.10                       | LC/MS pos | C00062           | HMDB00517              |
| asparagine                                    | 1.14 ± 0.16  | 1.00 ± 0.07         | 1.13 ± 0.12           | 1.13 ± 0.13  | 1.00 ± 0.07          | 1.08 ± 0.14            | 0.89 ± 0.06                    | 1.05 ± 0.11                      | 1.07 ± 0.09                     | 1.08 ± 0.15                       | GC/MS     | C00152           | HMDB00168              |
| aspartate                                     | 1.38 ± 0.15  | 0.99 ± 0.05         | 1.05 ± 0.13           | 1.25 ± 0.16  | 1.06 ± 0.08          | 1.55 ± 0.44            | 1.13 ± 0.18                    | 0.85 ± 0.13                      | 1.90 ± 0.85                     | 1.19 ± 0.13                       | GC/MS     | C00049           | HMDB00191              |
| beta-hydroxyisovalerate                       | 1.36 ± 0.19  | 1.28 ± 0.13         | 1.44 ± 0.16           | 0.80 ± 0.08  | 0.80 ± 0.06          | 1.03 ± 0.12            | 1.12 ± 0.13                    | 1.48 ± 0.22                      | 1.20 ± 0.14                     | 2.10 ± 0.71                       | LC/MS neg |                  | HMDB00754              |



| Biochemical                    | t0 SIRS+     | t0 Sepsis Survivors | t0 sepsis nonsurvivor | t24 SIRS+    | t24 Sepsis Survivors | t24 sepsis nonsurvivor | validation t0 Sepsis Survivors | Validation t0 sepsis nonsurvivor | Validation t24 Sepsis Survivors | Validation t24 sepsis nonsurvivor | PLATFORM  | KEGG ID  | HMDB ID     |
|--------------------------------|--------------|---------------------|-----------------------|--------------|----------------------|------------------------|--------------------------------|----------------------------------|---------------------------------|-----------------------------------|-----------|----------|-------------|
| beta-hydroxyppyrivate          | N/D          | N/D                 | N/D                   | N/D          | N/D                  | N/D                    | N/D                            | N/D                              | 0.94 ± 0.08                     | 0.84 ± 0.07                       | GC/MS     | C00168   | HMDB01352   |
| betaine                        | 1.26 ± 0.11  | 1.08 ± 0.07         | 1.25 ± 0.18           | 1.14 ± 0.13  | 1.09 ± 0.06          | 1.12 ± 0.11            | 0.95 ± 0.10                    | 1.36 ± 0.18                      | 0.96 ± 0.06                     | 1.17 ± 0.12                       | LC/MS pos | C00719   | HMDB00043   |
| beta-sitosterol                | 0.94 ± 0.21  | 0.92 ± 0.12         | 1.14 ± 0.27           | N/D          | N/D                  | N/D                    | N/D                            | N/D                              | N/D                             | N/D                               | GC/MS     | C01753   | HMDB00852   |
| bilirubin                      | 1.13 ± 0.18  | 1.38 ± 0.13         | 2.09 ± 0.75           | 0.80 ± 0.13  | 1.43 ± 0.19          | 3.26 ± 0.90            | 2.08 ± 0.35                    | 3.15 ± 1.14                      | 1.28 ± 0.23                     | 3.26 ± 1.34                       | LC/MS neg | C00486   | HMDB00054   |
| bilirubin (E,E)                | N/D          | N/D                 | N/D                   | N/D          | N/D                  | N/D                    | 1.22 ± 0.21                    | 0.95 ± 0.14                      | 1.38 ± 0.22                     | 1.17 ± 0.17                       | LC/MS pos | C00486   | HMDB00054   |
| bilirubin(E,Z or Z,E)          | N/D          | N/D                 | N/D                   | N/D          | N/D                  | N/D                    | 1.18 ± 0.18                    | 1.06 ± 0.22                      | N/D                             | N/D                               | LC/MS pos | C00486   | HMDB00054   |
| biliverdin                     | 1.06 ± 0.20  | 1.20 ± 0.15         | 1.00 ± 0.18           | 0.93 ± 0.16  | 1.05 ± 0.11          | 1.14 ± 0.16            | 1.42 ± 0.23                    | 0.76 ± 0.14                      | 1.31 ± 0.22                     | 1.05 ± 0.18                       | LC/MS pos | C00500   | HMDB01008   |
| butyrylcarnitine               | 1.26 ± 0.18  | 1.28 ± 0.15         | 2.06 ± 0.32*          | 1.04 ± 0.11  | 1.22 ± 0.12          | 1.96 ± 0.30*           | 0.96 ± 0.09                    | 2.92 ± 1.31                      | 1.05 ± 0.09                     | 3.00 ± 1.19*                      | LC/MS pos | C02862   | HMDB02013   |
| caffeine                       | 1.45 ± 0.42  | 2.81 ± 0.71         | 4.40 ± 2.33           | 1.53 ± 0.46  | 2.22 ± 0.41          | 2.96 ± 1.12            | 1.97 ± 0.47                    | 6.33 ± 3.45                      | 1.17 ± 0.23                     | 3.65 ± 1.68                       | LC/MS pos | C07481   | HMDB01847   |
| caprate                        | 1.03 ± 0.05  | 1.25 ± 0.15         | 1.42 ± 0.22           | 1.12 ± 0.11  | 1.03 ± 0.06          | 1.06 ± 0.09            | 1.48 ± 0.25                    | 1.09 ± 0.12                      | 1.10 ± 0.09                     | 0.91 ± 0.07                       | LC/MS neg | C01571   | HMDB00511   |
| caproate                       | 1.00 ± 0.10  | 1.17 ± 0.07         | 1.11 ± 0.12           | 1.30 ± 0.20  | 1.34 ± 0.11          | 0.95 ± 0.09            | 0.98 ± 0.03                    | 1.01 ± 0.05                      | 1.09 ± 0.07                     | 0.93 ± 0.09                       | LC/MS neg | C01585   | HMDB00535   |
| caprylate                      | 0.94 ± 0.07  | 1.17 ± 0.17         | 3.75 ± 2.59           | 1.18 ± 0.17  | 1.10 ± 0.07          | 1.05 ± 0.11            | 1.18 ± 0.09                    | 1.23 ± 0.21                      | 1.12 ± 0.07                     | 0.91 ± 0.09                       | LC/MS neg | C06423   | HMDB00482   |
| carnitine                      | 1.06 ± 0.06  | 0.93 ± 0.04         | 1.06 ± 0.08           | 1.13 ± 0.07  | 0.94 ± 0.04          | 1.03 ± 0.08            | 0.93 ± 0.06                    | 1.03 ± 0.15                      | 0.98 ± 0.06                     | 0.97 ± 0.08                       | LC/MS pos | C00487   | HMDB00062   |
| catechol sulfate               | 2.23 ± 0.47  | 2.10 ± 0.38         | 1.86 ± 0.62           | 1.47 ± 0.28  | 1.62 ± 0.23          | 1.19 ± 0.23            | 1.97 ± 0.61                    | 1.63 ± 0.27                      | 2.29 ± 0.62                     | 1.20 ± 0.29                       | LC/MS neg | (C00090) |             |
| C-glycosyltryptophan           | N/D          | N/D                 | N/D                   | N/D          | N/D                  | N/D                    | 1.69 ± 0.33                    | 2.57 ± 0.66                      | 1.96 ± 0.39                     | 2.40 ± 0.67                       | LC/MS pos |          |             |
| chenodeoxycholate              | N/D          | N/D                 | N/D                   | N/D          | N/D                  | N/D                    | N/D                            | N/D                              | 1.56 ± 0.31                     | 1.08 ± 0.25                       | LC/MS neg | C02528   | HMDB00518   |
| cholate                        | N/D          | N/D                 | N/D                   | 2.02 ± 0.98  | 1.38 ± 0.33          | 5.93 ± 3.87            | 4.55 ± 2.73                    | 1.33 ± 0.40                      | 4.04 ± 2.79                     | 1.05 ± 0.23                       | LC/MS neg | C00695   | HMDB00619   |
| cholesterol                    | 1.08 ± 0.05  | 1.01 ± 0.03         | 1.09 ± 0.07           | 1.02 ± 0.06  | 1.09 ± 0.05          | 1.03 ± 0.09            | 1.01 ± 0.06                    | 0.94 ± 0.05                      | 1.16 ± 0.10                     | 1.04 ± 0.07                       | GC/MS     | C00187   | HMDB00067   |
| choline                        | 1.31 ± 0.15  | 1.11 ± 0.06         | 1.16 ± 0.13           | 1.06 ± 0.12  | 1.13 ± 0.06          | 1.07 ± 0.08            | 0.99 ± 0.07                    | 1.09 ± 0.15                      | 1.08 ± 0.07                     | 0.97 ± 0.08                       | LC/MS pos | C00114   | HMDB00097   |
| citrate                        | 1.40 ± 0.13* | 1.03 ± 0.05         | 1.35 ± 0.17           | 1.64 ± 0.21  | 1.36 ± 0.25          | 1.29 ± 0.15            | 1.06 ± 0.09                    | 0.86 ± 0.10                      | 1.19 ± 0.08                     | 1.12 ± 0.19                       | GC/MS     | C00158   | HMDB00094   |
| citrulline                     | 1.60 ± 0.16* | 0.98 ± 0.08         | 0.91 ± 0.12           | 1.20 ± 0.11  | 0.93 ± 0.07          | 0.89 ± 0.15            | 1.07 ± 0.09                    | 1.03 ± 0.14                      | 1.22 ± 0.11                     | 0.93 ± 0.10                       | LC/MS pos | C00327   | HMDB00904   |
| cortisol                       | 0.79 ± 0.05  | 1.16 ± 0.08         | 1.45 ± 0.17           | 0.69 ± 0.09  | 1.51 ± 0.26          | 1.84 ± 0.23            | 1.41 ± 0.35                    | 1.35 ± 0.14                      | 1.19 ± 0.20                     | 1.70 ± 0.38                       | LC/MS pos | C00735   | HMDB00063   |
| cortisone                      | N/D          | N/D                 | N/D                   | 0.88 ± 0.09  | 0.92 ± 0.05          | 1.20 ± 0.10*           | 0.96 ± 0.07                    | 0.92 ± 0.11                      | 0.91 ± 0.07                     | 0.99 ± 0.08                       | LC/MS pos | C00762   | HMDB02802   |
| creatine                       | 1.15 ± 0.20  | 1.76 ± 0.20         | 2.65 ± 0.48           | 1.15 ± 0.20  | 1.49 ± 0.19          | 2.44 ± 0.42*           | 1.48 ± 0.28                    | 2.87 ± 0.95                      | 1.71 ± 0.31                     | 3.04 ± 0.83                       | LC/MS pos | C00300   | HMDB00064   |
| creatinine                     | 1.53 ± 0.31  | 1.88 ± 0.22         | 1.38 ± 0.23           | 1.59 ± 0.26  | 1.60 ± 0.18          | 1.51 ± 0.18            | 1.33 ± 0.17                    | 1.08 ± 0.19*                     | 1.45 ± 0.19                     | 1.04 ± 0.18                       | LC/MS pos | C00791   | HMDB00562   |
| cysteine                       | 1.49 ± 0.22  | 1.15 ± 0.10         | 1.26 ± 0.16           | 1.26 ± 0.18  | 1.20 ± 0.09          | 1.44 ± 0.17            | 1.18 ± 0.10                    | 1.15 ± 0.11                      | 1.26 ± 0.14                     | 1.20 ± 0.18                       | GC/MS     | C00097   | HMDB00574   |
| cystine                        | 2.38 ± 0.58* | 1.67 ± 0.71         | 2.56 ± 0.76           | N/D          | N/D                  | N/D                    | N/D                            | N/D                              | N/D                             | N/D                               | GC/MS     | C00491   | HMDB00192   |
| decanoylcarnitine              | 1.74 ± 0.27* | 0.99 ± 0.08         | 2.43 ± 0.41*          | 1.21 ± 0.19  | 1.12 ± 0.08          | 2.30 ± 0.34*           | N/D                            | N/D                              | 0.96 ± 0.07                     | 1.66 ± 0.24*                      | LC/MS pos | C03299   | HMDB00651   |
| dehydroisoandrosterone sulfate | 0.87 ± 0.20* | 1.82 ± 0.21         | 1.28 ± 0.20           | 1.07 ± 0.27  | 1.79 ± 0.24          | 1.54 ± 0.27            | 1.95 ± 0.37                    | 1.54 ± 0.38                      | 1.37 ± 0.22                     | 1.17 ± 0.27                       | LC/MS neg | (C01227) | HMDB01032   |
| deoxycarnitine                 | 1.24 ± 0.14  | 1.25 ± 0.11         | 1.51 ± 0.19           | 1.24 ± 0.16  | 1.20 ± 0.12          | 1.46 ± 0.18            | 0.96 ± 0.07                    | 1.43 ± 0.27                      | 1.01 ± 0.08                     | 1.17 ± 0.20                       | LC/MS pos | C01181   | HMDB01161   |
| deoxycholate                   | 1.08 ± 0.44  | 1.19 ± 0.17         | 0.53 ± 0.11*          | N/D          | N/D                  | N/D                    | 1.48 ± 0.37                    | 0.81 ± 0.15                      | 1.20 ± 0.18                     | 0.98 ± 0.22                       | LC/MS neg | C04483   | HMDB00626   |
| dihomolinoleate                | 1.16 ± 0.12  | 0.98 ± 0.07         | 1.09 ± 0.11           | 1.40 ± 0.22  | 1.05 ± 0.07          | 1.35 ± 0.22            | 0.96 ± 0.07                    | 1.05 ± 0.08                      | 0.98 ± 0.10                     | 1.14 ± 0.22                       | LC/MS neg |          |             |
| dihomolinolenate               | 1.27 ± 0.12  | 1.12 ± 0.08         | 1.09 ± 0.12           | 1.35 ± 0.15  | 1.08 ± 0.09          | 0.98 ± 0.11            | 1.02 ± 0.08                    | 1.01 ± 0.15                      | 1.10 ± 0.08                     | 0.97 ± 0.13                       | LC/MS neg | C03242   | HMDB02925   |
| dihydroxyacetone               | 1.65 ± 0.26  | 1.44 ± 0.16         | 0.66 ± 0.07*          | 0.84 ± 0.14  | 0.95 ± 0.09          | 0.73 ± 0.09            | N/D                            | N/D                              | 1.36 ± 0.18                     | 1.26 ± 0.21                       | GC/MS     | C00184   | HMDB01882   |
| docosahexaenoate               | 1.55 ± 0.17  | 1.15 ± 0.09         | 1.35 ± 0.17           | 1.50 ± 0.20  | 1.16 ± 0.09          | 1.20 ± 0.16            | 1.18 ± 0.14                    | 1.05 ± 0.13                      | 1.10 ± 0.09                     | 1.01 ± 0.14                       | LC/MS neg | C06429   | HMDB02183   |
| docosapentaenoate              | 1.35 ± 0.16  | 1.09 ± 0.09         | 1.38 ± 0.20           | 1.40 ± 0.23  | 1.15 ± 0.10          | 1.45 ± 0.25            | 1.25 ± 0.15                    | 1.09 ± 0.13                      | 1.14 ± 0.13                     | 1.02 ± 0.17                       | LC/MS neg | C16513   | HMDB01976   |
| dodecanedioate                 | N/D          | N/D                 | N/D                   | N/D          | N/D                  | N/D                    | 1.05 ± 0.20                    | 0.87 ± 0.13                      | 0.87 ± 0.05                     | 1.08 ± 0.21                       | LC/MS neg | C02678   | HMDB00623   |
| eicosapentaenoate              | 1.53 ± 0.21  | 1.27 ± 0.13         | 1.44 ± 0.48           | 1.48 ± 0.15  | 1.31 ± 0.15          | 1.33 ± 0.42            | 1.29 ± 0.15                    | 1.00 ± 0.11                      | 1.24 ± 0.08                     | 1.03 ± 0.11                       | LC/MS neg | C06428   | HMDB01999   |
| eicosenoate                    | 1.10 ± 0.12  | 1.04 ± 0.08         | 1.34 ± 0.15           | 1.33 ± 0.21  | 1.06 ± 0.06          | 1.58 ± 0.25            | 0.92 ± 0.07                    | 1.11 ± 0.10                      | 1.06 ± 0.13                     | 1.49 ± 0.30                       | LC/MS neg |          | HMDB02231   |
| epiandrosterone sulfate        | 1.30 ± 0.38  | 2.21 ± 0.31         | 1.21 ± 0.20           | 1.15 ± 0.32  | 1.85 ± 0.46          | 1.20 ± 0.20            | 1.28 ± 0.20                    | 1.07 ± 0.25                      | 1.31 ± 0.21                     | 1.24 ± 0.27                       | LC/MS neg | (C07635) | (HMDB00365) |
| erythritol                     | 1.48 ± 0.35  | 1.65 ± 0.22         | 2.19 ± 0.37*          | 1.18 ± 0.22  | 1.37 ± 0.21          | 2.27 ± 0.36*           | 1.22 ± 0.17                    | 2.03 ± 0.44                      | 1.31 ± 0.21                     | 1.90 ± 0.48                       | GC/MS     | C00503   | HMDB01032   |
| erythronate                    | 1.76 ± 0.46  | 2.32 ± 0.35         | 2.46 ± 0.49*          | 1.44 ± 0.33  | 1.71 ± 0.33          | 2.23 ± 0.34*           | 1.49 ± 0.27                    | 2.22 ± 0.54                      | 1.78 ± 0.38                     | 2.34 ± 0.66                       | GC/MS     | C01620   | HMDB00613   |
| erythrose                      | 1.42 ± 0.14  | 1.23 ± 0.08         | 0.89 ± 0.05           | 1.08 ± 0.11  | 1.11 ± 0.06          | 0.99 ± 0.08            | 1.28 ± 0.16                    | 1.05 ± 0.10                      | 1.11 ± 0.08                     | 1.17 ± 0.11                       | GC/MS     | C01796   | HMDB02649   |
| estrone 3-sulfate              | N/D          | N/D                 | N/D                   | N/D          | N/D                  | N/D                    | N/D                            | N/D                              | 0.78 ± 0.17                     | 1.70 ± 1.07                       | LC/MS neg | C02538   | HMDB01425   |
| fructose                       | 1.78 ± 0.29  | 1.58 ± 0.20         | 1.15 ± 0.14           | 1.42 ± 0.20  | 1.53 ± 0.17          | 0.86 ± 0.06            | 1.40 ± 0.21                    | 1.18 ± 0.15                      | 2.05 ± 0.44                     | 1.91 ± 0.59                       | GC/MS     | C00095   | HMDB00660   |
| galactonate                    | 1.62 ± 0.26  | 1.35 ± 0.16         | 1.08 ± 0.14           | 1.17 ± 0.18  | 1.39 ± 0.30          | 0.89 ± 0.12            | 1.50 ± 0.30                    | 1.04 ± 0.13                      | 1.08 ± 0.08                     | 1.03 ± 0.13                       | GC/MS     | C00257   | HMDB03290   |
| gamma-glutamylglutamine        | 1.19 ± 0.15  | 1.03 ± 0.09         | 0.95 ± 0.16           | 1.21 ± 0.18  | 0.99 ± 0.09          | 1.09 ± 0.19            | 0.84 ± 0.08                    | 0.95 ± 0.14                      | 1.04 ± 0.08                     | 0.88 ± 0.12                       | LC/MS pos |          |             |
| gamma-glutamylisoleucine       | N/D          | N/D                 | N/D                   | 0.93 ± 0.07* | 0.74 ± 0.03          | 0.87 ± 0.11            | 1.00 ± 0.11                    | 0.82 ± 0.12                      | 1.10 ± 0.11                     | 0.85 ± 0.12                       | LC/MS pos |          |             |
| gamma-glutamylleucine          | 1.19 ± 0.10  | 1.13 ± 0.06         | 1.06 ± 0.11           | 1.03 ± 0.08  | 1.06 ± 0.05          | 1.24 ± 0.21            | 1.21 ± 0.09                    | 0.83 ± 0.08*                     | 1.13 ± 0.09                     | 0.92 ± 0.10                       | LC/MS pos |          |             |
| gamma-glutamylmethionine       | N/D          | N/D                 | N/D                   | N/D          | N/D                  | N/D                    | 0.68 ± 0.07                    | 0.88 ± 0.11                      | 0.91 ± 0.07                     | 1.09 ± 0.18                       | LC/MS pos |          |             |
| gamma-glutamylphenylalanine    | 0.98 ± 0.10  | 1.09 ± 0.07         | 1.23 ± 0.13           | 1.00 ± 0.08  | 1.19 ± 0.08          | 1.59 ± 0.31            | 1.29 ± 0.12                    | 1.12 ± 0.15                      | 1.10 ± 0.09                     | 1.11 ± 0.13                       | LC/MS pos |          | HMDB00594   |

| Biochemical                 | t0 SIRS+     | t0 Sepsis Survivors | t0 sepsis nonsurvivor | t24 SIRS+    | t24 Sepsis Survivors | t24 sepsis nonsurvivor | validation t0 Sepsis Survivors | Validation t0 sepsis nonsurvivor | Validation t24 Sepsis Survivors | Validation t24 sepsis nonsurvivor | PLATFORM  | KEGG ID  | HMDB ID     |
|-----------------------------|--------------|---------------------|-----------------------|--------------|----------------------|------------------------|--------------------------------|----------------------------------|---------------------------------|-----------------------------------|-----------|----------|-------------|
| gamma-glutamyltyrosine      | 1.24 ± 0.21  | 0.99 ± 0.05         | 1.23 ± 0.16           | 1.13 ± 0.10  | 0.85 ± 0.05          | 1.34 ± 0.28*           | 0.98 ± 0.07                    | 1.01 ± 0.07                      | 1.03 ± 0.08                     | 1.27 ± 0.14                       | LC/MS pos |          |             |
| gluconate                   | 2.17 ± 0.45  | 4.02 ± 1.20         | 1.99 ± 0.46           | 1.79 ± 0.42  | 5.21 ± 1.71          | 3.16 ± 1.75            | 2.03 ± 0.62                    | 4.52 ± 3.34                      | 6.68 ± 3.69                     | 6.63 ± 3.85                       | GC/MS     | C00257   | HMDB00625   |
| glucose                     | 1.22 ± 0.11  | 1.11 ± 0.06         | 1.12 ± 0.10           | 1.09 ± 0.07  | 1.03 ± 0.03          | 1.04 ± 0.06            | 1.05 ± 0.05                    | 1.05 ± 0.08                      | 1.07 ± 0.08                     | 0.98 ± 0.09                       | GC/MS     | C00267   | HMDB00122   |
| glucuronate                 | 1.95 ± 0.63  | 2.21 ± 0.39         | 2.49 ± 0.53*          | N/D          | N/D                  | N/D                    | 1.24 ± 0.15                    | 1.76 ± 0.49                      | 1.47 ± 0.37                     | 1.65 ± 0.39                       | GC/MS     | C00191   | HMDB00127   |
| glutamate                   | 2.65 ± 0.53* | 1.16 ± 0.10         | 1.33 ± 0.32           | 2.39 ± 0.45* | 1.35 ± 0.16          | 1.53 ± 0.39            | 2.01 ± 0.52                    | 1.16 ± 0.25                      | 2.29 ± 0.81                     | 1.30 ± 0.23                       | GC/MS     | C00025   | HMDB03339   |
| glutamine                   | 1.20 ± 0.07* | 0.97 ± 0.03         | 1.07 ± 0.08           | 1.15 ± 0.05  | 0.99 ± 0.04          | 1.11 ± 0.12            | 1.02 ± 0.04                    | 1.06 ± 0.07                      | 1.02 ± 0.06                     | 1.02 ± 0.08                       | LC/MS pos | C00064   | HMDB00641   |
| glutamylvaline              | 1.10 ± 0.09  | 1.17 ± 0.08         | 1.24 ± 0.13           | 1.10 ± 0.09  | 1.03 ± 0.06          | 1.35 ± 0.17*           | 1.17 ± 0.10                    | 0.90 ± 0.07                      | 1.24 ± 0.11                     | 1.03 ± 0.09                       | LC/MS pos |          |             |
| glutaryl carnitine          | 1.56 ± 0.39  | 1.45 ± 0.16         | 1.60 ± 0.28           | 1.38 ± 0.24  | 1.29 ± 0.16          | 1.71 ± 0.23*           | 1.10 ± 0.13                    | 1.06 ± 0.20                      | 1.17 ± 0.13                     | 1.08 ± 0.18                       | LC/MS pos |          |             |
| glycerate                   | 1.25 ± 0.14  | 1.01 ± 0.04         | 1.22 ± 0.11           | 1.23 ± 0.08  | 1.00 ± 0.05          | 1.11 ± 0.10            | 1.21 ± 0.14                    | 1.28 ± 0.16                      | 1.28 ± 0.16                     | 1.22 ± 0.11                       | GC/MS     | C00258   | HMDB00139   |
| glycerol                    | 1.42 ± 0.17  | 0.99 ± 0.05         | 1.23 ± 0.12           | 1.44 ± 0.22  | 1.04 ± 0.04          | 1.29 ± 0.14            | 1.06 ± 0.13                    | 1.18 ± 0.12                      | 1.15 ± 0.11                     | 1.41 ± 0.26                       | GC/MS     | C00116   | HMDB00131   |
| glycerol 2-phosphate        | N/D          | N/D                 | N/D                   | N/D          | N/D                  | N/D                    | 0.91 ± 0.09                    | 1.09 ± 0.15                      | N/D                             | N/D                               | GC/MS     | C02979   | HMDB02520   |
| glycerol 3-phosphate        | 1.29 ± 0.11* | 1.03 ± 0.03         | 1.01 ± 0.06           | 1.24 ± 0.06  | 1.05 ± 0.04          | 1.07 ± 0.11            | 1.19 ± 0.11                    | 1.06 ± 0.13                      | 1.16 ± 0.10                     | 0.97 ± 0.06                       | GC/MS     | C00093   | HMDB00126   |
| glycerophosphorylcholine    | N/D          | N/D                 | N/D                   | 1.55 ± 0.25  | 1.28 ± 0.15          | 0.76 ± 0.12*           | 1.12 ± 0.17                    | 1.12 ± 0.28                      | 1.27 ± 0.30                     | 0.93 ± 0.23                       | LC/MS pos | C00670   | HMDB00086   |
| glycine                     | 1.17 ± 0.16  | 1.00 ± 0.06         | 1.18 ± 0.12           | 1.25 ± 0.10* | 0.96 ± 0.05          | 0.98 ± 0.08            | 1.05 ± 0.12                    | 1.39 ± 0.38                      | 1.10 ± 0.09                     | 0.97 ± 0.09                       | GC/MS     | C00037   | HMDB00123   |
| glycochenodeoxycholate      | 4.41 ± 2.18  | 2.46 ± 0.84         | 9.17 ± 4.34           | 1.27 ± 0.23  | 2.29 ± 0.53          | 3.53 ± 1.18            | 1.54 ± 0.32                    | 3.51 ± 1.57                      | 1.46 ± 0.28                     | 3.38 ± 1.25                       | LC/MS neg | C05466   |             |
| glycocholate                | 2.65 ± 0.88  | 3.64 ± 1.19         | 8.88 ± 4.57           | 1.14 ± 0.28  | 2.53 ± 0.63          | 2.32 ± 0.48            | 2.78 ± 0.76                    | 4.28 ± 1.95                      | 2.34 ± 0.70                     | 4.25 ± 1.96                       | LC/MS neg | C01921   | HMDB00138   |
| glycodeoxycholate           | N/D          | N/D                 | N/D                   | 0.79 ± 0.22  | 1.30 ± 0.26          | 0.58 ± 0.15            | 1.03 ± 0.30                    | 1.03 ± 0.55                      | 1.30 ± 0.35                     | 0.71 ± 0.31                       | LC/MS pos | C05464   | HMDB00631   |
| glycolate                   | N/D          | N/D                 | N/D                   | 1.40 ± 0.28  | 1.09 ± 0.07          | 1.02 ± 0.08            | 1.02 ± 0.04                    | 1.24 ± 0.32                      | 1.03 ± 0.05                     | 1.11 ± 0.06                       | GC/MS     | C00160   | HMDB00115   |
| glycylproline               | N/D          | N/D                 | N/D                   | N/D          | N/D                  | N/D                    | N/D                            | N/D                              | 0.83 ± 0.08                     | 0.87 ± 0.21                       | LC/MS pos |          | HMDB00721   |
| gulono-1,4-lactone          | 2.25 ± 0.83  | 2.53 ± 0.54         | 1.37 ± 0.37           | 1.36 ± 0.56  | 2.29 ± 0.75          | 1.22 ± 0.24            | N/D                            | N/D                              | 1.65 ± 0.39                     | 1.55 ± 0.54                       | GC/MS     | C01040   | HMDB03466   |
| heme                        | 2.52 ± 0.74  | 2.04 ± 0.29         | 1.26 ± 0.39           | 1.62 ± 0.50  | 2.05 ± 0.35          | 2.37 ± 1.16            | 2.95 ± 1.07                    | 1.12 ± 0.51                      | 6.73 ± 4.22                     | 1.16 ± 0.27                       | LC/MS pos | C00032   | HMDB03178   |
| heptanoate                  | 0.86 ± 0.07  | 0.96 ± 0.04         | 0.93 ± 0.08           | 1.26 ± 0.17  | 1.21 ± 0.10          | 0.83 ± 0.08            | 1.01 ± 0.02                    | 0.96 ± 0.06                      | 1.15 ± 0.08                     | 0.89 ± 0.10                       | LC/MS neg |          | HMDB00666   |
| hexadecanedioate            | 0.99 ± 0.38  | 0.94 ± 0.10         | 1.91 ± 0.55           | 0.93 ± 0.22  | 1.04 ± 0.10          | 3.11 ± 0.75*           | 0.83 ± 0.12                    | 1.60 ± 0.35*                     | 1.06 ± 0.23                     | 3.90 ± 1.83*                      | LC/MS neg |          | HMDB00672   |
| hexanoyl carnitine          | 1.24 ± 0.18  | 1.14 ± 0.11         | 2.27 ± 0.31*          | 0.91 ± 0.11  | 1.08 ± 0.09          | 2.14 ± 0.27*           | 0.99 ± 0.10                    | 1.79 ± 0.34                      | 0.89 ± 0.08                     | 1.96 ± 0.41*                      | LC/MS pos |          | HMDB00705   |
| hippurate                   | 4.73 ± 1.42  | 9.91 ± 4.49         | 7.02 ± 3.69           | 3.09 ± 1.01  | 4.24 ± 1.11          | 5.60 ± 2.53            | 7.24 ± 2.26                    | 4.25 ± 2.98                      | 8.02 ± 2.69                     | 7.84 ± 5.23                       | LC/MS neg | C01586   | HMDB00714   |
| histidine                   | 1.20 ± 0.06* | 0.98 ± 0.03         | 1.06 ± 0.06           | 1.00 ± 0.04  | 1.03 ± 0.04          | 1.08 ± 0.13            | 1.04 ± 0.05                    | 0.95 ± 0.07                      | 0.98 ± 0.05                     | 0.96 ± 0.07                       | LC/MS neg | C00135   | HMDB00177   |
| homocitrulline              | 1.07 ± 0.21* | 0.70 ± 0.07         | 0.84 ± 0.13           | N/D          | N/D                  | N/D                    | N/D                            | N/D                              | 0.86 ± 0.13                     | 1.17 ± 0.31                       | LC/MS pos | C02427   | HMDB00679   |
| homostachydrine             | N/D          | N/D                 | N/D                   | 0.96 ± 0.10  | 0.97 ± 0.08          | 0.84 ± 0.14            | 0.92 ± 0.11                    | 1.30 ± 0.18                      | 1.04 ± 0.14                     | 1.17 ± 0.24                       | LC/MS pos | C08283   | HMDB04827   |
| hydroquinone sulfate        | N/D          | N/D                 | N/D                   | 1.41 ± 0.71  | 1.35 ± 0.26          | 2.78 ± 1.35*           | N/D                            | N/D                              | 1.26 ± 0.37                     | 4.05 ± 2.08                       | LC/MS neg | (C00530) | (HMDB02434) |
| hydroxyisovaleryl carnitine | 1.28 ± 0.21  | 1.11 ± 0.14         | 1.39 ± 0.19           | 1.33 ± 0.33  | 1.14 ± 0.14          | 1.58 ± 0.21*           | 1.07 ± 0.19                    | 1.24 ± 0.26                      | 1.10 ± 0.14                     | 1.14 ± 0.15                       | LC/MS pos |          |             |
| hydroxyproline              | 1.56 ± 0.25  | 1.11 ± 0.08         | 1.69 ± 0.26*          | 1.27 ± 0.13  | 1.04 ± 0.10          | 1.57 ± 0.21*           | 1.11 ± 0.12                    | 1.26 ± 0.21                      | 1.14 ± 0.15                     | 1.16 ± 0.18                       | GC/MS     | C01157   | HMDB00725   |
| hyodeoxycholate             | N/D          | N/D                 | N/D                   | 1.04 ± 0.21  | 0.76 ± 0.09          | 0.86 ± 0.25            | 0.84 ± 0.17                    | 1.25 ± 0.45                      | 1.02 ± 0.26                     | 1.10 ± 0.54                       | LC/MS neg | C15517   | HMDB00733   |
| hypoxanthine                | 1.11 ± 0.14  | 1.15 ± 0.09         | 1.18 ± 0.16           | 0.92 ± 0.18  | 1.35 ± 0.20          | 0.92 ± 0.13            | 1.00 ± 0.08                    | 0.94 ± 0.13                      | 1.80 ± 0.52                     | 1.60 ± 0.34                       | LC/MS pos | C00262   | HMDB00157   |
| ibuprofen                   | N/D          | N/D                 | N/D                   | 3.44 ± 2.34  | 4.03 ± 1.90          | 1.62 ± 0.81            | N/D                            | N/D                              | N/D                             | N/D                               | LC/MS neg | C01588   | HMDB01925   |
| iminodiacetate              | 1.13 ± 0.14  | 1.22 ± 0.08         | 0.96 ± 0.08           | 1.31 ± 0.19  | 1.18 ± 0.11          | 0.98 ± 0.11            | 1.72 ± 0.31                    | 0.81 ± 0.15                      | 1.44 ± 0.19                     | 1.07 ± 0.20                       | GC/MS     |          | HMDB11753   |
| indoleacetate               | N/D          | N/D                 | N/D                   | 1.44 ± 0.20  | 1.17 ± 0.12          | 1.23 ± 0.17            | 1.38 ± 0.22                    | 1.47 ± 0.32                      | 1.26 ± 0.18                     | 1.04 ± 0.12                       | LC/MS pos | C00954   | HMDB00197   |
| indolelactate               | 1.47 ± 0.24  | 1.28 ± 0.12         | 1.22 ± 0.16           | 1.29 ± 0.20  | 1.10 ± 0.10          | 1.51 ± 0.27            | 1.17 ± 0.13                    | 0.91 ± 0.14                      | 1.36 ± 0.20                     | 1.14 ± 0.18                       | GC/MS     | C02043   | HMDB00671   |
| indolepropionate            | N/D          | N/D                 | N/D                   | 0.96 ± 0.10  | 1.01 ± 0.10          | 0.92 ± 0.09            | 0.96 ± 0.12                    | 1.17 ± 0.27                      | 0.99 ± 0.09                     | 0.93 ± 0.16                       | LC/MS pos |          | HMDB02302   |
| isobutyryl carnitine        | 1.99 ± 0.44  | 1.44 ± 0.18         | 2.80 ± 0.52*          | 1.35 ± 0.23  | 1.15 ± 0.11          | 2.49 ± 0.50*           | 1.18 ± 0.16                    | 1.19 ± 0.27                      | 1.67 ± 0.33                     | 1.60 ± 0.41                       | LC/MS pos |          | HMDB00736   |
| isoleucine                  | 1.35 ± 0.10* | 0.98 ± 0.05         | 1.14 ± 0.09           | 1.21 ± 0.06  | 1.05 ± 0.04          | 0.92 ± 0.11            | 1.05 ± 0.11                    | 0.96 ± 0.14                      | 1.10 ± 0.06                     | 0.92 ± 0.11                       | LC/MS pos | C00407   | HMDB00172   |
| isovalerate                 | 0.82 ± 0.10  | 0.79 ± 0.05         | 0.77 ± 0.08           | N/D          | N/D                  | N/D                    | 0.96 ± 0.05                    | 1.02 ± 0.06                      | 1.29 ± 0.15                     | 0.85 ± 0.10                       | LC/MS neg | C08262   | HMDB00718   |
| isovaleryl carnitine        | 1.37 ± 0.23  | 1.21 ± 0.13         | 1.27 ± 0.19           | 1.01 ± 0.17  | 1.12 ± 0.09          | 1.16 ± 0.18            | 1.46 ± 0.19                    | 1.06 ± 0.18                      | 1.10 ± 0.12                     | 1.08 ± 0.17                       | LC/MS pos |          | HMDB00688   |
| kynurenate                  | 0.93 ± 0.22  | 0.99 ± 0.14         | 1.01 ± 0.12           | N/D          | N/D                  | N/D                    | N/D                            | N/D                              | N/D                             | N/D                               | LC/MS neg | C01717   | HMDB00715   |
| kynurenine                  | 1.16 ± 0.11  | 1.18 ± 0.07         | 1.06 ± 0.09           | 0.99 ± 0.09  | 1.19 ± 0.09          | 1.43 ± 0.19            | 1.24 ± 0.12                    | 0.92 ± 0.15                      | 1.11 ± 0.10                     | 1.13 ± 0.16                       | LC/MS pos | C00328   | HMDB00183   |
| lactate                     | 1.19 ± 0.16  | 1.09 ± 0.07         | 1.52 ± 0.19           | 1.07 ± 0.09  | 1.07 ± 0.05          | 1.50 ± 0.20*           | 1.13 ± 0.08                    | 1.25 ± 0.20                      | 1.10 ± 0.16                     | 1.24 ± 0.15                       | GC/MS     | C00186   | HMDB00190   |
| lathosterol                 | 0.61 ± 0.09  | 0.75 ± 0.07         | 0.72 ± 0.15           | N/D          | N/D                  | N/D                    | N/D                            | N/D                              | N/D                             | N/D                               | GC/MS     | C01189   | HMDB01170   |
| laurate                     | 1.08 ± 0.07  | 1.16 ± 0.06         | 1.17 ± 0.11           | 1.03 ± 0.05  | 1.04 ± 0.04          | 1.06 ± 0.08            | 1.22 ± 0.17                    | 1.25 ± 0.14                      | 1.05 ± 0.04                     | 1.00 ± 0.06                       | LC/MS neg | C02679   | HMDB00638   |
| lauryl carnitine            | 2.18 ± 0.69* | 0.81 ± 0.07         | 1.76 ± 0.35*          | 1.50 ± 0.21* | 0.89 ± 0.08          | 1.32 ± 0.23            | 0.81 ± 0.11                    | 1.31 ± 0.20                      | 0.92 ± 0.10                     | 1.27 ± 0.23                       | LC/MS pos |          |             |
| leucine                     | 1.11 ± 0.11  | 1.07 ± 0.05         | 1.05 ± 0.08           | 1.04 ± 0.08  | 1.04 ± 0.04          | 1.00 ± 0.13            | 1.08 ± 0.09                    | 0.81 ± 0.10                      | 1.15 ± 0.07                     | 0.97 ± 0.10                       | LC/MS pos | C00123   | HMDB00687   |
| linoleate                   | 1.08 ± 0.09  | 0.95 ± 0.06         | 1.02 ± 0.08           | 1.14 ± 0.10  | 0.96 ± 0.05          | 1.05 ± 0.10            | 0.94 ± 0.07                    | 1.04 ± 0.08                      | 0.93 ± 0.07                     | 1.06 ± 0.14                       | LC/MS neg | C01595   | HMDB00673   |

| Biochemical                   | t0 SIRS+     | t0 Sepsis Survivors | t0 sepsis nonsurvivor | t24 SIRS+    | t24 Sepsis Survivors | t24 sepsis nonsurvivor | validation t0 Sepsis Survivors | Validation t0 sepsis nonsurvivor | Validation t24 Sepsis Survivors | Validation t24 sepsis nonsurvivor | PLATFORM  | KEGG ID  | HMDB ID   |
|-------------------------------|--------------|---------------------|-----------------------|--------------|----------------------|------------------------|--------------------------------|----------------------------------|---------------------------------|-----------------------------------|-----------|----------|-----------|
| linolenate                    | 1.22 ± 0.14  | 1.08 ± 0.09         | 0.97 ± 0.09           | 1.32 ± 0.15  | 1.10 ± 0.10          | 1.08 ± 0.12            | 1.18 ± 0.12                    | 1.09 ± 0.11                      | 1.12 ± 0.11                     | 1.15 ± 0.18                       | LC/MS neg | C06427   | HMDB01388 |
| lysine                        | 5.03 ± 1.54* | 1.26 ± 0.24         | 2.22 ± 0.73           | 2.36 ± 0.67  | 1.61 ± 0.28          | 6.41 ± 4.33            | 1.01 ± 0.06                    | 1.03 ± 0.08                      | 0.99 ± 0.03                     | 1.05 ± 0.05                       | LC/MS pos | C00047   | HMDB00182 |
| malate                        | 1.89 ± 0.43* | 1.02 ± 0.05         | 1.71 ± 0.32*          | 1.50 ± 0.26* | 0.98 ± 0.06          | 1.37 ± 0.17*           | 1.15 ± 0.11                    | 1.47 ± 0.29                      | 1.12 ± 0.13                     | 1.26 ± 0.17                       | GC/MS     | C00149   | HMDB00156 |
| maltose                       | 0.85 ± 0.19  | 1.36 ± 0.22         | 1.84 ± 0.51           | N/D          | N/D                  | N/D                    | N/D                            | N/D                              | 1.24 ± 0.28                     | 1.01 ± 0.18                       | GC/MS     | C00208   | HMDB00163 |
| mannitol                      | 1.85 ± 0.58  | 3.18 ± 1.58         | 3.49 ± 1.16           | 1.65 ± 0.40  | 5.40 ± 2.45          | 10.56 ± 2.57*          | 3.61 ± 2.32                    | 6.21 ± 4.13                      | 4.52 ± 2.01                     | 14.79 ± 8.52                      | GC/MS     | C00392   | HMDB00765 |
| mannose                       | 1.04 ± 0.11  | 1.31 ± 0.11         | 1.14 ± 0.13           | 0.98 ± 0.11  | 1.19 ± 0.05          | 1.09 ± 0.11            | 1.55 ± 0.25                    | 1.27 ± 0.18                      | 1.30 ± 0.14                     | 0.97 ± 0.07                       | GC/MS     | C00159   | HMDB00169 |
| margarate                     | 1.30 ± 0.14  | 1.19 ± 0.08         | 1.21 ± 0.11           | 1.11 ± 0.11  | 1.00 ± 0.05          | 1.14 ± 0.11            | 1.03 ± 0.09                    | 1.15 ± 0.09                      | 1.00 ± 0.09                     | 1.08 ± 0.15                       | LC/MS neg |          | HMDB02259 |
| methionine                    | 1.84 ± 0.54* | 1.06 ± 0.06         | 1.37 ± 0.16           | 1.60 ± 0.33* | 1.04 ± 0.05          | 1.51 ± 0.39            | 1.01 ± 0.06                    | 1.13 ± 0.10                      | 1.07 ± 0.06                     | 1.31 ± 0.31                       | LC/MS neg | C00073   | HMDB00696 |
| methyl linoleate              | N/D          | N/D                 | N/D                   | N/D          | N/D                  | N/D                    | 0.76 ± 0.09                    | 0.83 ± 0.14                      | N/D                             | N/D                               | GC/MS     |          |           |
| methylglutaryl carnitine      | N/D          | N/D                 | N/D                   | N/D          | N/D                  | N/D                    | 1.18 ± 0.18                    | 2.05 ± 0.48                      | 1.29 ± 0.20                     | 1.93 ± 0.57                       | LC/MS pos |          |           |
| myo-inositol                  | 2.40 ± 0.51  | 2.07 ± 0.28         | 2.38 ± 0.59           | 1.71 ± 0.32  | 2.17 ± 0.38          | 2.26 ± 0.36            | 1.49 ± 0.20                    | 2.72 ± 0.57                      | 1.34 ± 0.22                     | 1.89 ± 0.43                       | GC/MS     | C00137   | HMDB00211 |
| myristate                     | 1.14 ± 0.10  | 1.11 ± 0.07         | 1.18 ± 0.11           | 1.10 ± 0.07  | 1.03 ± 0.04          | 1.10 ± 0.08            | 1.02 ± 0.10                    | 1.22 ± 0.14                      | 1.02 ± 0.07                     | 1.08 ± 0.12                       | LC/MS neg | C06424   | HMDB00806 |
| myristoleate                  | 1.35 ± 0.17  | 1.21 ± 0.09         | 1.45 ± 0.25           | 1.20 ± 0.12  | 1.13 ± 0.06          | 1.36 ± 0.20            | 1.28 ± 0.19                    | 1.28 ± 0.21                      | 1.22 ± 0.21                     | 1.35 ± 0.24                       | LC/MS neg | C08322   | HMDB02000 |
| N2,N2-dimethylguanosine       | 1.23 ± 0.35  | 1.49 ± 0.21         | 1.84 ± 0.37*          | 1.06 ± 0.37  | 1.57 ± 0.29          | 1.93 ± 0.32*           | 1.63 ± 0.34                    | 1.90 ± 0.61                      | 1.75 ± 0.42                     | 1.98 ± 0.64                       | LC/MS pos |          | HMDB04824 |
| N6-carbamoylthreonyladenosine | 1.12 ± 0.27  | 1.38 ± 0.19         | 1.49 ± 0.34           | 1.36 ± 0.47  | 1.87 ± 0.35          | 1.96 ± 0.31*           | 1.92 ± 0.43                    | 2.28 ± 0.72                      | 1.85 ± 0.41                     | 2.01 ± 0.60                       | LC/MS pos |          |           |
| N-acetylalanine               | 1.02 ± 0.10  | 1.26 ± 0.10         | 1.51 ± 0.13*          | 0.94 ± 0.11  | 1.10 ± 0.10          | 1.62 ± 0.14*           | 1.13 ± 0.12                    | 1.31 ± 0.17                      | 1.21 ± 0.14                     | 1.42 ± 0.22                       | LC/MS neg | C02847   | HMDB00766 |
| N-acetylaspartate             | 1.22 ± 0.22  | 0.82 ± 0.05         | 1.04 ± 0.11           | N/D          | N/D                  | N/D                    | N/D                            | N/D                              | N/D                             | N/D                               | GC/MS     | C01042   | HMDB00812 |
| N-acetylglucosamine 6-sulfate | N/D          | N/D                 | N/D                   | 1.01 ± 0.19  | 1.21 ± 0.20          | 1.59 ± 0.22*           | N/D                            | N/D                              | 1.27 ± 0.23                     | 1.69 ± 0.49                       | LC/MS neg | C04132   | HMDB00814 |
| N-acetyl glycine              | 1.22 ± 0.15  | 1.13 ± 0.07         | 1.53 ± 0.23           | 0.95 ± 0.14  | 0.89 ± 0.07          | 1.05 ± 0.12            | 1.08 ± 0.12                    | 1.33 ± 0.31                      | 1.18 ± 0.15                     | 1.03 ± 0.21                       | GC/MS     |          | HMDB00532 |
| N-acetylmethionine            | N/D          | N/D                 | N/D                   | N/D          | N/D                  | N/D                    | 1.31 ± 0.19                    | 1.40 ± 0.30                      | 1.06 ± 0.16                     | 1.39 ± 0.28                       | LC/MS pos | C02712   | HMDB11745 |
| N-acetylneuraminate           | 1.69 ± 0.56  | 1.64 ± 0.26         | 9.83 ± 6.42*          | 1.05 ± 0.30  | 1.43 ± 0.31          | 6.97 ± 4.49*           | 1.21 ± 0.16                    | 1.77 ± 0.35                      | 1.37 ± 0.27                     | 1.70 ± 0.45                       | GC/MS     | C00270   | HMDB00230 |
| N-acetylorithine              | 0.94 ± 0.13  | 1.00 ± 0.09         | 0.80 ± 0.10           | 1.08 ± 0.15  | 0.87 ± 0.08          | 0.77 ± 0.11            | 1.05 ± 0.15                    | 1.24 ± 0.20                      | 0.93 ± 0.11                     | 0.92 ± 0.12                       | LC/MS pos | C00437   | HMDB03357 |
| N-acetylthreonine             | 1.01 ± 0.12  | 1.42 ± 0.16         | 1.86 ± 0.34*          | 1.18 ± 0.15  | 1.02 ± 0.09          | 1.56 ± 0.17*           | 0.89 ± 0.13                    | 1.65 ± 0.29*                     | 1.23 ± 0.17                     | 1.72 ± 0.35                       | LC/MS neg |          |           |
| N-formylmethionine            | N/D          | N/D                 | N/D                   | N/D          | N/D                  | N/D                    | N/D                            | N/D                              | 0.83 ± 0.10                     | 1.14 ± 0.16                       | LC/MS neg | C03145   | HMDB01015 |
| nonadecanoate                 | N/D          | N/D                 | N/D                   | 1.11 ± 0.06  | 0.98 ± 0.05          | 1.15 ± 0.09            | 1.00 ± 0.08                    | 1.10 ± 0.10                      | 0.99 ± 0.07                     | 1.33 ± 0.17                       | LC/MS neg | C16535   | HMDB00772 |
| octadecanedioate              | 1.16 ± 0.27  | 1.01 ± 0.13         | 2.06 ± 0.40*          | 1.41 ± 0.50  | 1.11 ± 0.12          | 4.21 ± 1.80*           | 0.87 ± 0.09                    | 2.14 ± 0.54*                     | 1.05 ± 0.23                     | 4.74 ± 3.08                       | LC/MS neg |          | HMDB00782 |
| octanoyl carnitine            | 1.69 ± 0.24* | 1.17 ± 0.15         | 2.67 ± 0.43*          | 1.05 ± 0.14  | 1.18 ± 0.10          | 2.89 ± 0.58*           | 0.98 ± 0.11                    | 2.04 ± 0.36*                     | 0.94 ± 0.09                     | 2.25 ± 0.41*                      | LC/MS pos |          | HMDB00791 |
| oleate                        | 1.09 ± 0.11  | 0.98 ± 0.05         | 1.14 ± 0.09           | 1.03 ± 0.11  | 1.01 ± 0.07          | 1.31 ± 0.15            | 1.01 ± 0.09                    | 1.03 ± 0.09                      | 0.98 ± 0.11                     | 1.13 ± 0.18                       | GC/MS     | C00712   | HMDB00207 |
| oleoyl carnitine              | N/D          | N/D                 | N/D                   | N/D          | N/D                  | N/D                    | 1.11 ± 0.09                    | 0.99 ± 0.17                      | 1.18 ± 0.11                     | 0.94 ± 0.13                       | LC/MS pos |          |           |
| ornithine                     | 2.98 ± 0.82* | 1.25 ± 0.18         | 2.25 ± 0.59           | 1.81 ± 0.42  | 1.47 ± 0.26          | 3.42 ± 1.91            | N/D                            | N/D                              | 1.97 ± 0.42                     | 2.04 ± 0.67                       | GC/MS     | C00077   | HMDB03374 |
| oxaloacetate                  | 1.09 ± 0.20  | 1.52 ± 0.19         | 2.04 ± 0.37           | 1.10 ± 0.27  | 1.60 ± 0.24          | 1.98 ± 0.51            | 2.06 ± 0.46                    | 2.42 ± 0.89                      | 1.20 ± 0.18                     | 1.88 ± 0.51                       | GC/MS     | C00036   | HMDB00223 |
| p-acetamidophenyl glucuronide | 0.92 ± 0.31  | 1.14 ± 0.14         | 0.85 ± 0.26           | 0.73 ± 0.49* | 1.82 ± 0.29          | 1.00 ± 0.31            | 1.41 ± 0.30                    | 0.82 ± 0.21                      | 1.44 ± 0.31                     | 0.79 ± 0.23                       | LC/MS neg |          |           |
| palmitate                     | 1.13 ± 0.09  | 1.01 ± 0.06         | 1.11 ± 0.09           | 1.06 ± 0.08  | 0.95 ± 0.04          | 1.03 ± 0.08            | 0.97 ± 0.06                    | 1.03 ± 0.06                      | 0.92 ± 0.06                     | 0.97 ± 0.09                       | LC/MS neg | C00249   | HMDB00220 |
| palmitoleate                  | 1.30 ± 0.16  | 1.16 ± 0.08         | 1.32 ± 0.15           | 1.15 ± 0.13  | 1.05 ± 0.06          | 1.25 ± 0.16            | 1.08 ± 0.12                    | 1.14 ± 0.16                      | 1.18 ± 0.20                     | 1.26 ± 0.19                       | LC/MS neg | C08362   | HMDB03229 |
| palmitoyl carnitine           | 2.22 ± 0.89* | 0.84 ± 0.06         | 1.75 ± 0.39*          | 1.48 ± 0.19* | 0.90 ± 0.05          | 1.12 ± 0.17            | 1.08 ± 0.11                    | 0.93 ± 0.14                      | 1.02 ± 0.10                     | 0.87 ± 0.10                       | LC/MS pos | C02990   | HMDB00222 |
| pantothenate                  | 0.86 ± 0.12  | 1.21 ± 0.16         | 1.24 ± 0.31           | 0.95 ± 0.20  | 1.42 ± 0.16          | 1.49 ± 0.27            | 1.96 ± 0.41                    | 2.17 ± 0.73                      | 2.53 ± 0.64                     | 1.90 ± 0.68                       | LC/MS pos | C00864   | HMDB00210 |
| paraxanthine                  | N/D          | N/D                 | N/D                   | N/D          | N/D                  | N/D                    | 0.98 ± 0.28                    | 1.21 ± 0.44                      | 0.98 ± 0.19                     | 1.26 ± 0.33                       | LC/MS pos | C13747   | HMDB01860 |
| p-cresol sulfate              | 1.23 ± 0.19  | 1.38 ± 0.14         | 1.39 ± 0.19           | 1.22 ± 0.19  | 1.48 ± 0.17          | 2.03 ± 0.30*           | 1.39 ± 0.25                    | 1.62 ± 0.45                      | 1.49 ± 0.24                     | 1.29 ± 0.26                       | LC/MS neg | (C01468) |           |
| pelargonate                   | 0.89 ± 0.07  | 0.97 ± 0.04         | 0.86 ± 0.06           | 1.12 ± 0.11  | 1.08 ± 0.07          | 0.81 ± 0.08            | 1.05 ± 0.03                    | 0.97 ± 0.05                      | 1.11 ± 0.08                     | 0.84 ± 0.10                       | LC/MS neg | C01601   | HMDB00847 |
| pentadecanoate                | N/D          | N/D                 | N/D                   | N/D          | N/D                  | N/D                    | 1.11 ± 0.10                    | 1.28 ± 0.14                      | 1.11 ± 0.08                     | 1.11 ± 0.11                       | LC/MS neg | C16537   | HMDB00826 |
| phenol sulfate                | 2.02 ± 0.44  | 1.45 ± 0.18         | 1.81 ± 0.53           | 1.36 ± 0.34  | 1.12 ± 0.13          | 1.52 ± 0.21*           | 1.32 ± 0.26                    | 3.26 ± 1.10                      | 1.30 ± 0.17                     | 2.36 ± 0.79                       | LC/MS neg | C02180   |           |
| phenylacetate                 | 1.21 ± 0.32  | 0.94 ± 0.11         | 1.32 ± 0.33           | N/D          | N/D                  | N/D                    | N/D                            | N/D                              | 0.76 ± 0.10                     | 0.76 ± 0.15                       | LC/MS neg | C07086   | HMDB00209 |
| phenylacetylglutamine         | 2.32 ± 0.64  | 4.27 ± 0.90         | 4.12 ± 1.33           | 1.77 ± 0.47  | 3.56 ± 0.86          | 5.30 ± 1.43*           | 2.69 ± 0.91                    | 3.37 ± 1.57                      | 4.13 ± 1.39                     | 3.78 ± 2.04                       | LC/MS neg | C05597   | HMDB06344 |
| phenylalanine                 | 1.04 ± 0.07  | 1.08 ± 0.04         | 1.08 ± 0.06           | 0.94 ± 0.03  | 1.10 ± 0.04          | 1.21 ± 0.15            | 1.09 ± 0.06                    | 0.95 ± 0.07                      | 1.08 ± 0.06                     | 1.00 ± 0.09                       | LC/MS pos | C00079   | HMDB00159 |
| phenyllactate                 | N/D          | N/D                 | N/D                   | 1.18 ± 0.33  | 1.03 ± 0.11          | 2.81 ± 0.80*           | 1.15 ± 0.12                    | 1.49 ± 0.32                      | 1.11 ± 0.15                     | 1.67 ± 0.42                       | LC/MS neg | C05607   | HMDB00779 |
| phosphate                     | 1.23 ± 0.07* | 0.97 ± 0.03         | 1.12 ± 0.06           | 1.11 ± 0.06  | 1.05 ± 0.05          | 1.20 ± 0.07*           | 0.99 ± 0.05                    | 1.01 ± 0.05                      | 1.11 ± 0.07                     | 1.03 ± 0.08                       | GC/MS     | C00009   | HMDB01429 |
| pipecolate                    | 2.15 ± 0.51  | 1.45 ± 0.21         | 2.08 ± 0.38           | 2.26 ± 0.50  | 1.50 ± 0.23          | 2.00 ± 0.37            | 1.37 ± 0.41                    | 3.32 ± 0.93*                     | 1.19 ± 0.19                     | 2.78 ± 0.71*                      | LC/MS pos | C00408   | HMDB00070 |
| piperine                      | 1.25 ± 0.26  | 1.06 ± 0.17         | 0.42 ± 0.12*          | 3.02 ± 0.75  | 2.13 ± 0.39          | 0.61 ± 0.17*           | 1.69 ± 0.32                    | 0.50 ± 0.11*                     | 1.79 ± 0.32                     | 0.56 ± 0.12*                      | LC/MS pos | C03882   |           |
| proline                       | 1.48 ± 0.16* | 1.06 ± 0.05         | 1.28 ± 0.13           | 1.34 ± 0.11* | 0.99 ± 0.05          | 1.33 ± 0.22            | 1.03 ± 0.06                    | 1.16 ± 0.19                      | 1.01 ± 0.08                     | 1.06 ± 0.12                       | LC/MS pos | C00148   | HMDB00162 |
| prolylhydroxyproline          | 1.41 ± 0.43  | 1.54 ± 0.22         | 1.86 ± 0.23*          | 1.06 ± 0.12  | 1.34 ± 0.16          | 1.79 ± 0.19*           | 1.43 ± 0.22                    | 1.56 ± 0.25                      | 1.44 ± 0.21                     | 1.31 ± 0.20                       | LC/MS pos |          | HMDB06695 |
| propionyl carnitine           | 2.10 ± 0.35* | 1.20 ± 0.11         | 2.53 ± 0.49*          | 1.28 ± 0.17  | 0.98 ± 0.06          | 1.65 ± 0.21*           | 1.20 ± 0.16                    | 1.76 ± 0.49                      | 1.07 ± 0.12                     | 1.36 ± 0.23                       | LC/MS pos | C03017   | HMDB00824 |
| pseudouridine                 | 1.25 ± 0.21  | 1.43 ± 0.14         | 1.74 ± 0.20*          | 1.13 ± 0.19  | 1.29 ± 0.15          | 1.89 ± 0.22*           | 1.31 ± 0.18                    | 2.11 ± 0.43                      | 1.15 ± 0.16                     | 1.45 ± 0.27                       | LC/MS pos | C02067   | HMDB00767 |

| Biochemical                  | t0 SIRS+     | t0 Sepsis Survivors | t0 sepsis nonsurvivor | t24 SIRS+    | t24 Sepsis Survivors | t24 sepsis nonsurvivor | validation t0 Sepsis Survivors | Validation t0 sepsis nonsurvivor | Validation t24 Sepsis Survivors | Validation t24 sepsis nonsurvivor | PLATFORM  | KEGG ID  | HMDB ID     |
|------------------------------|--------------|---------------------|-----------------------|--------------|----------------------|------------------------|--------------------------------|----------------------------------|---------------------------------|-----------------------------------|-----------|----------|-------------|
| pyridoxate                   | 1.48 ± 0.59  | 3.89 ± 1.05         | 2.36 ± 0.77           | 2.91 ± 1.71  | 6.20 ± 2.33          | 4.57 ± 2.04            | 4.36 ± 1.87                    | 3.56 ± 2.10                      | 7.49 ± 3.37                     | 6.38 ± 3.11                       | LC/MS neg | C00847   | HMDB00017   |
| pyroglutamine                | 2.05 ± 0.39  | 1.32 ± 0.13         | 1.90 ± 0.30           | 2.16 ± 0.50  | 1.22 ± 0.14          | 2.10 ± 0.32*           | 1.02 ± 0.12                    | 1.72 ± 0.27                      | 0.94 ± 0.12                     | 1.49 ± 0.28                       | LC/MS pos |          |             |
| pyruvate                     | 0.98 ± 0.16  | 1.29 ± 0.12         | 1.65 ± 0.28           | 1.22 ± 0.15  | 1.10 ± 0.09          | 1.77 ± 0.29*           | 1.62 ± 0.24                    | 1.68 ± 0.38                      | 1.18 ± 0.23                     | 1.41 ± 0.29                       | LC/MS neg | C00022   | HMDB00243   |
| quinate                      | 2.21 ± 0.60  | 2.25 ± 0.53         | 2.65 ± 1.44           | 1.47 ± 0.37  | 1.19 ± 0.25          | 1.00 ± 0.31            | N/D                            | N/D                              | N/D                             | N/D                               | GC/MS     | C00296   | HMDB03072   |
| riboflavin                   | N/D          | N/D                 | N/D                   | N/D          | N/D                  | N/D                    | 1.25 ± 0.31                    | 1.30 ± 0.43                      | N/D                             | N/D                               | LC/MS pos | C00255   | HMDB00244   |
| saccharin                    | N/D          | N/D                 | N/D                   | N/D          | N/D                  | N/D                    | N/D                            | N/D                              | 1.38 ± 0.46                     | 20.78 ± 16.76                     | LC/MS neg | C12283   |             |
| salicylate                   | N/D          | N/D                 | N/D                   | N/D          | N/D                  | N/D                    | 7.39 ± 4.97                    | 1.29 ± 0.82                      | N/D                             | N/D                               | LC/MS neg | C00805   | HMDB01895   |
| salicyluric glucuronide      | N/D          | N/D                 | N/D                   | 1.01 ± 0.29  | 3.13 ± 1.32          | 2.46 ± 1.30            | 4.97 ± 2.96                    | 7.44 ± 3.87                      | N/D                             | N/D                               | LC/MS neg |          |             |
| scyllo-inositol              | 2.05 ± 0.49  | 1.37 ± 0.16         | 2.07 ± 0.40           | 1.33 ± 0.26  | 1.38 ± 0.27          | 2.02 ± 0.40            | 0.99 ± 0.12                    | 2.85 ± 1.18*                     | 0.73 ± 0.11                     | 1.65 ± 0.51                       | GC/MS     | C06153   | HMDB06088   |
| serine                       | 2.46 ± 0.43* | 1.24 ± 0.11         | 1.46 ± 0.24           | 1.66 ± 0.27  | 1.09 ± 0.08          | 1.27 ± 0.36            | 1.69 ± 0.50                    | 1.13 ± 0.18                      | 1.42 ± 0.20                     | 1.12 ± 0.19                       | GC/MS     | C00065   | HMDB03406   |
| sphingomyelin                | N/D          | N/D                 | N/D                   | N/D          | N/D                  | N/D                    | 1.09 ± 0.09                    | 1.03 ± 0.15                      | 1.23 ± 0.14                     | 1.10 ± 0.11                       | GC/MS     | C00550   | HMDB01348   |
| sphingosine                  | N/D          | N/D                 | N/D                   | N/D          | N/D                  | N/D                    | 0.63 ± 0.08                    | 0.77 ± 0.14                      | 0.99 ± 0.08                     | 0.87 ± 0.18                       | LC/MS pos | C00319   | HMDB00252   |
| stachydrine                  | 2.12 ± 0.54  | 1.72 ± 0.28         | 2.36 ± 0.69           | 1.34 ± 0.20  | 0.92 ± 0.09          | 1.15 ± 0.26            | 1.33 ± 0.31                    | 5.16 ± 1.93                      | 0.96 ± 0.17                     | 2.20 ± 0.63                       | LC/MS pos | C10172   | HMDB04827   |
| stearate                     | 1.16 ± 0.09  | 1.07 ± 0.06         | 1.10 ± 0.09           | 1.10 ± 0.09  | 1.01 ± 0.04          | 1.12 ± 0.09            | 0.98 ± 0.06                    | 1.03 ± 0.05                      | 0.97 ± 0.06                     | 1.05 ± 0.11                       | LC/MS neg | C01530   | HMDB00827   |
| stearidonate                 | 1.36 ± 0.19  | 0.98 ± 0.09         | 1.65 ± 0.73           | 1.27 ± 0.23  | 0.90 ± 0.14          | 1.52 ± 0.46            | 1.18 ± 0.14                    | 0.93 ± 0.20                      | 0.83 ± 0.09                     | 0.81 ± 0.14                       | LC/MS neg | C16300   | HMDB06547   |
| stearyl carnitine            | N/D          | N/D                 | N/D                   | N/D          | N/D                  | N/D                    | 0.77 ± 0.07                    | 0.85 ± 0.15                      | 0.92 ± 0.10                     | 0.75 ± 0.09                       | LC/MS pos |          | HMDB00848   |
| succinate                    | N/D          | N/D                 | N/D                   | N/D          | N/D                  | N/D                    | 1.05 ± 0.07                    | 1.03 ± 0.05                      | 1.05 ± 0.09                     | 0.95 ± 0.07                       | GC/MS     | C00042   | HMDB00254   |
| succinoyl carnitine          | N/D          | N/D                 | N/D                   | N/D          | N/D                  | N/D                    | 1.08 ± 0.13                    | 1.39 ± 0.27                      | 1.10 ± 0.13                     | 1.28 ± 0.27                       | LC/MS pos |          |             |
| sucrose                      | 1.11 ± 0.43  | 1.15 ± 0.21         | 3.13 ± 1.28*          | 1.95 ± 0.54  | 2.18 ± 0.54          | 2.10 ± 0.47            | 3.77 ± 1.39                    | 1.83 ± 0.45                      | 3.95 ± 1.64                     | 3.09 ± 1.63                       | LC/MS neg | C00089   | HMDB00258   |
| symmetric dimethylarginine   | 1.22 ± 0.14  | 1.16 ± 0.08         | 1.50 ± 0.14*          | 1.01 ± 0.09  | 1.14 ± 0.08          | 1.55 ± 0.16*           | 1.05 ± 0.08                    | 1.22 ± 0.18                      | 1.09 ± 0.10                     | 1.19 ± 0.21                       | LC/MS pos |          | HMDB03334   |
| taurochenodeoxycholate       | 3.59 ± 1.86  | 3.53 ± 1.39         | 12.44 ± 4.96          | 1.66 ± 0.54  | 5.37 ± 2.45          | 11.30 ± 3.91           | 3.10 ± 0.79                    | 10.74 ± 5.86                     | 1.61 ± 0.32                     | 4.95 ± 2.21                       | LC/MS neg | C05465   | HMDB00951   |
| taurocholate                 | 2.28 ± 0.78  | 3.94 ± 1.37         | 14.80 ± 7.06          | 1.53 ± 0.55  | 4.15 ± 1.42          | 8.60 ± 3.65            | 4.19 ± 1.64                    | 8.06 ± 3.93                      | 4.07 ± 2.25                     | 6.26 ± 3.10                       | LC/MS neg | C05122   | HMDB00036   |
| tauroolithocholate 3-sulfate | 1.02 ± 0.21  | 1.52 ± 0.23         | 1.54 ± 0.45           | 1.03 ± 0.17  | 2.46 ± 0.64          | 2.24 ± 0.69            | 2.60 ± 0.81                    | 6.06 ± 3.53                      | 1.45 ± 0.30                     | 2.78 ± 1.21                       | LC/MS neg | C03642   | HMDB02580   |
| tetradecanedioate            | N/D          | N/D                 | N/D                   | N/D          | N/D                  | N/D                    | 1.00 ± 0.18                    | 0.93 ± 0.16                      | 1.01 ± 0.07                     | 1.30 ± 0.14                       | LC/MS neg |          | HMDB00872   |
| theobromine                  | N/D          | N/D                 | N/D                   | N/D          | N/D                  | N/D                    | 1.18 ± 0.32                    | 2.05 ± 0.66                      | 1.20 ± 0.26                     | 2.15 ± 0.90                       | LC/MS pos | C07480   | HMDB02825   |
| theophylline                 | N/D          | N/D                 | N/D                   | N/D          | N/D                  | N/D                    | N/D                            | N/D                              | 0.77 ± 0.15                     | 1.18 ± 0.38                       | LC/MS neg | C07130   |             |
| threitol                     | 1.93 ± 0.43  | 2.03 ± 0.36         | 2.14 ± 0.56           | 1.98 ± 0.48  | 1.76 ± 0.40          | 2.07 ± 0.46*           | 1.50 ± 0.26                    | 2.28 ± 0.58                      | 1.80 ± 0.34                     | 2.19 ± 0.63                       | GC/MS     |          | HMDB04136   |
| threonate                    | 1.35 ± 0.24  | 1.57 ± 0.22         | 1.34 ± 0.20           | 1.46 ± 0.33  | 1.42 ± 0.19          | 1.26 ± 0.17            | 1.42 ± 0.28                    | 1.40 ± 0.28                      | 1.77 ± 0.38                     | 1.26 ± 0.27                       | GC/MS     | C01620   | HMDB00943   |
| threonine                    | 1.47 ± 0.19  | 1.03 ± 0.09         | 1.10 ± 0.18           | 1.24 ± 0.08  | 1.03 ± 0.06          | 1.15 ± 0.17            | 1.56 ± 0.39                    | 1.06 ± 0.11                      | 1.37 ± 0.18                     | 1.42 ± 0.35                       | GC/MS     | C00188   | HMDB00167   |
| thymol sulfate               | N/D          | N/D                 | N/D                   | N/D          | N/D                  | N/D                    | N/D                            | N/D                              | 1.35 ± 0.31                     | 1.49 ± 0.61                       | LC/MS neg | (C09908) | (HMDB01878) |
| tiglyl carnitine             | 0.97 ± 0.17  | 0.87 ± 0.11         | 1.22 ± 0.15*          | 0.86 ± 0.17  | 0.74 ± 0.10          | 1.34 ± 0.24*           | 1.12 ± 0.15                    | 1.01 ± 0.15                      | 1.12 ± 0.11                     | 1.15 ± 0.14                       | LC/MS pos |          |             |
| trigonelline                 | N/D          | N/D                 | N/D                   | 1.14 ± 0.22  | 1.16 ± 0.17          | 0.75 ± 0.30            | 1.01 ± 0.23                    | 1.44 ± 0.55                      | 1.40 ± 0.37                     | 1.23 ± 0.50                       | LC/MS pos | C01004   | HMDB00875   |
| tryptophan                   | 1.27 ± 0.08* | 1.05 ± 0.05         | 0.88 ± 0.09           | 1.32 ± 0.11* | 1.06 ± 0.07          | 0.89 ± 0.12            | 1.12 ± 0.09                    | 0.78 ± 0.08                      | 1.07 ± 0.08                     | 1.03 ± 0.15                       | LC/MS pos | C00078   | HMDB00929   |
| tyrosine                     | 1.37 ± 0.15* | 0.94 ± 0.04         | 1.18 ± 0.14           | 1.26 ± 0.07* | 1.02 ± 0.05          | 1.24 ± 0.22            | 1.01 ± 0.05                    | 1.04 ± 0.09                      | 1.10 ± 0.06                     | 1.13 ± 0.12                       | LC/MS pos | C00082   | HMDB00158   |
| urate                        | 1.11 ± 0.06  | 0.99 ± 0.03         | 1.14 ± 0.07           | 1.24 ± 0.08* | 0.94 ± 0.04          | 1.15 ± 0.10            | 1.03 ± 0.06                    | 1.26 ± 0.13                      | 0.98 ± 0.06                     | 1.07 ± 0.10                       | LC/MS neg | C00366   | HMDB00289   |
| urea                         | 1.38 ± 0.23  | 1.18 ± 0.10         | 1.61 ± 0.22*          | 1.14 ± 0.10  | 0.94 ± 0.05          | 1.36 ± 0.12*           | 1.01 ± 0.05                    | 0.99 ± 0.09                      | 1.14 ± 0.14                     | 1.49 ± 0.26                       | GC/MS     | C00086   | HMDB00294   |
| uridine                      | 1.45 ± 0.14* | 1.03 ± 0.05         | 0.97 ± 0.08           | 1.10 ± 0.08  | 1.00 ± 0.05          | 0.82 ± 0.06            | 0.97 ± 0.04                    | 0.98 ± 0.10                      | 1.08 ± 0.07                     | 0.96 ± 0.07                       | LC/MS neg | C00299   | HMDB00296   |
| urobilinogen                 | N/D          | N/D                 | N/D                   | N/D          | N/D                  | N/D                    | 0.82 ± 0.20                    | 2.00 ± 0.67                      | N/D                             | N/D                               | LC/MS neg | C05791   | HMDB04158   |
| ursodeoxycholate             | N/D          | N/D                 | N/D                   | 1.47 ± 0.46  | 2.40 ± 1.53          | 1.17 ± 0.33            | 0.82 ± 0.19                    | 1.08 ± 0.30                      | N/D                             | N/D                               | LC/MS neg | C07880   | HMDB00946   |
| vaccenate                    | 0.68 ± 0.12  | 0.69 ± 0.07         | 0.60 ± 0.10           | N/D          | N/D                  | N/D                    | 0.86 ± 0.09                    | 0.92 ± 0.10                      | 1.30 ± 0.14                     | 0.88 ± 0.16                       | GC/MS     | C08367   |             |
| valine                       | 1.24 ± 0.07* | 1.03 ± 0.03         | 0.95 ± 0.06           | 1.05 ± 0.06  | 1.05 ± 0.04          | 0.98 ± 0.10            | 1.08 ± 0.07                    | 0.87 ± 0.08                      | 1.02 ± 0.04                     | 0.90 ± 0.08                       | LC/MS pos | C00183   | HMDB00883   |
| vanillylmandelate            | 1.44 ± 0.39  | 1.27 ± 0.20         | 1.80 ± 0.46*          | N/D          | N/D                  | N/D                    | N/D                            | N/D                              | N/D                             | N/D                               | GC/MS     | C05584   | HMDB00291   |
| X-01327                      | 1.22 ± 0.18  | 1.62 ± 0.23         | 1.49 ± 0.25           | 1.87 ± 0.36  | 1.48 ± 0.20          | 1.87 ± 0.39            | N/D                            | N/D                              | N/D                             | N/D                               | LC/MS pos |          |             |
| X-01911                      | N/D          | N/D                 | N/D                   | 1.41 ± 0.43  | 1.31 ± 0.21          | 0.44 ± 0.11*           | 1.57 ± 0.30                    | 0.58 ± 0.14*                     | 1.26 ± 0.23                     | 0.41 ± 0.07*                      | LC/MS pos |          |             |
| X-02249                      | 1.51 ± 0.26  | 1.61 ± 0.19         | 1.03 ± 0.25           | 1.59 ± 0.23  | 1.59 ± 0.20          | 1.19 ± 0.24            | 1.67 ± 0.29                    | 1.25 ± 0.33                      | 2.06 ± 0.40                     | 1.19 ± 0.32                       | LC/MS neg |          |             |
| X-02269                      | N/D          | N/D                 | N/D                   | N/D          | N/D                  | N/D                    | 1.58 ± 0.38                    | 0.77 ± 0.13                      | 1.58 ± 0.45                     | 0.58 ± 0.08                       | LC/MS neg |          |             |
| X-02973                      | 1.06 ± 0.05  | 1.05 ± 0.03         | 1.01 ± 0.05           | 1.05 ± 0.06  | 1.08 ± 0.04          | 0.96 ± 0.06            | 1.18 ± 0.09                    | 1.00 ± 0.08                      | 1.11 ± 0.06                     | 1.10 ± 0.11                       | GC/MS     |          |             |
| X-03002                      | N/D          | N/D                 | N/D                   | N/D          | N/D                  | N/D                    | N/D                            | N/D                              | 2.72 ± 0.97                     | 1.01 ± 0.26                       | GC/MS     |          |             |
| X-03056                      | 0.99 ± 0.13  | 1.46 ± 0.14         | 1.86 ± 0.26           | 1.02 ± 0.13  | 1.26 ± 0.10          | 1.77 ± 0.22*           | 1.29 ± 0.18                    | 1.60 ± 0.33                      | 1.21 ± 0.16                     | 1.32 ± 0.27                       | LC/MS pos |          |             |
| X-03090                      | 1.11 ± 0.09  | 1.06 ± 0.04         | 1.04 ± 0.05           | N/D          | N/D                  | N/D                    | 1.09 ± 0.12                    | 0.63 ± 0.10                      | 1.00 ± 0.16                     | 0.79 ± 0.19                       | GC/MS     |          |             |
| X-03091                      | N/D          | N/D                 | N/D                   | N/D          | N/D                  | N/D                    | 1.53 ± 0.22                    | 0.74 ± 0.17*                     | 0.81 ± 0.16                     | 0.67 ± 0.23                       | GC/MS     |          |             |

| Biochemical | t0 SIRS+     | t0 Sepsis Survivors | t0 sepsis nonsurvivor | t24 SIRS+    | t24 Sepsis Survivors | t24 sepsis nonsurvivor | validation t0 Sepsis Survivors | Validation t0 sepsis nonsurvivor | Validation t24 Sepsis Survivors | Validation t24 sepsis nonsurvivor | PLATFORM  | KEGG ID | HMDB ID |
|-------------|--------------|---------------------|-----------------------|--------------|----------------------|------------------------|--------------------------------|----------------------------------|---------------------------------|-----------------------------------|-----------|---------|---------|
| X-03094     | 1.22 ± 0.09  | 1.09 ± 0.06         | 1.05 ± 0.11           | 1.09 ± 0.11  | 1.11 ± 0.09          | 1.01 ± 0.12            | 1.18 ± 0.11                    | 0.89 ± 0.13                      | 1.15 ± 0.13                     | 0.94 ± 0.12                       | GC/MS     |         |         |
| X-03951     | 1.81 ± 0.51  | 1.79 ± 0.23         | 2.21 ± 0.46*          | 1.55 ± 0.36  | 1.64 ± 0.26          | 2.25 ± 0.29*           | N/D                            | N/D                              | N/D                             | N/D                               | LC/MS pos |         |         |
| X-04015     | N/D          | N/D                 | N/D                   | N/D          | N/D                  | N/D                    | 1.02 ± 0.07                    | 0.99 ± 0.06                      | 0.76 ± 0.11                     | 0.62 ± 0.10                       | GC/MS     |         |         |
| X-04272     | N/D          | N/D                 | N/D                   | N/D          | N/D                  | N/D                    | 0.94 ± 0.07                    | 0.73 ± 0.09                      | 1.01 ± 0.08                     | 0.96 ± 0.08                       | GC/MS     |         |         |
| X-04357     | 1.56 ± 0.19* | 1.08 ± 0.07         | 1.86 ± 0.34*          | 1.46 ± 0.19* | 0.90 ± 0.08          | 1.91 ± 0.33*           | 1.07 ± 0.10                    | 1.26 ± 0.24                      | 1.21 ± 0.16                     | 1.52 ± 0.24                       | GC/MS     |         |         |
| X-04494     | N/D          | N/D                 | N/D                   | N/D          | N/D                  | N/D                    | 1.04 ± 0.10                    | 1.23 ± 0.17                      | 0.82 ± 0.08                     | 1.14 ± 0.17                       | GC/MS     |         |         |
| X-04495     | 1.45 ± 0.23  | 1.31 ± 0.13         | 1.71 ± 0.34           | 1.28 ± 0.18  | 1.01 ± 0.10          | 1.44 ± 0.18*           | 1.23 ± 0.15                    | 1.39 ± 0.25                      | 1.10 ± 0.12                     | 1.25 ± 0.20                       | GC/MS     |         |         |
| X-04498     | 1.17 ± 0.17  | 1.13 ± 0.11         | 1.78 ± 0.23*          | 1.10 ± 0.13  | 1.02 ± 0.10          | 1.96 ± 0.31*           | 1.28 ± 0.17                    | 2.27 ± 0.67                      | 1.28 ± 0.19                     | 1.58 ± 0.30                       | GC/MS     |         |         |
| X-04499     | 1.06 ± 0.13  | 1.06 ± 0.08         | 1.99 ± 0.30*          | 0.87 ± 0.09  | 0.94 ± 0.07          | 1.59 ± 0.24*           | 1.00 ± 0.13                    | 1.39 ± 0.33                      | 1.85 ± 0.51                     | 2.47 ± 1.38                       | GC/MS     |         |         |
| X-04504     | 2.94 ± 1.46  | 4.53 ± 1.62         | 2.74 ± 0.81           | 1.02 ± 0.34  | 4.46 ± 2.89          | 2.05 ± 0.80            | N/D                            | N/D                              | 2.85 ± 1.10                     | 2.04 ± 0.52                       | GC/MS     |         |         |
| X-04507     | 2.17 ± 0.75  | 1.85 ± 0.30         | 1.71 ± 0.43           | 1.27 ± 0.39  | 1.52 ± 0.36          | 1.69 ± 0.35*           | 1.59 ± 0.39                    | 2.50 ± 0.87                      | 1.37 ± 0.35                     | 1.46 ± 0.41                       | GC/MS     |         |         |
| X-04515     | 0.70 ± 0.19  | 1.80 ± 0.71         | 1.38 ± 0.42           | 1.50 ± 0.37  | 0.83 ± 0.19          | 0.88 ± 0.27            | N/D                            | N/D                              | 0.74 ± 0.17                     | 1.54 ± 0.46                       | GC/MS     |         |         |
| X-04595     | 0.81 ± 0.12  | 0.64 ± 0.05         | 1.01 ± 0.13*          | 0.95 ± 0.10  | 0.85 ± 0.06          | 1.22 ± 0.14*           | 0.92 ± 0.09                    | 1.23 ± 0.19                      | 0.80 ± 0.09                     | 1.20 ± 0.18                       | GC/MS     |         |         |
| X-04598     | N/D          | N/D                 | N/D                   | 1.09 ± 0.16  | 0.79 ± 0.08          | 1.23 ± 0.14*           | 0.97 ± 0.16                    | 1.41 ± 0.23                      | 1.15 ± 0.16                     | 1.54 ± 0.29                       | GC/MS     |         |         |
| X-04629     | 1.11 ± 0.25  | 1.71 ± 0.28         | 1.45 ± 0.30           | 0.76 ± 0.23  | 1.03 ± 0.25          | 1.07 ± 0.17            | 1.03 ± 0.15                    | 0.95 ± 0.17                      | 1.21 ± 0.33                     | 1.08 ± 0.27                       | GC/MS     |         |         |
| X-05415     | N/D          | N/D                 | N/D                   | N/D          | N/D                  | N/D                    | 1.07 ± 0.28                    | 1.07 ± 0.37                      | 1.86 ± 0.68                     | 0.82 ± 0.37                       | GC/MS     |         |         |
| X-05426     | 2.50 ± 0.85  | 2.64 ± 0.62         | 1.37 ± 0.57           | 2.06 ± 0.63  | 2.35 ± 0.68          | 1.39 ± 0.27            | 1.40 ± 0.32                    | 1.52 ± 0.56                      | 1.84 ± 0.63                     | 1.72 ± 0.62                       | GC/MS     |         |         |
| X-05491     | 1.17 ± 0.21  | 0.98 ± 0.11         | 1.23 ± 0.17           | N/D          | N/D                  | N/D                    | 1.41 ± 0.29                    | 1.10 ± 0.10                      | 1.27 ± 0.20                     | 1.15 ± 0.15                       | GC/MS     |         |         |
| X-05522     | 2.05 ± 0.76  | 3.27 ± 0.81         | 3.01 ± 0.74           | 1.13 ± 0.36  | 2.13 ± 0.66          | 1.79 ± 0.33            | 0.86 ± 0.16                    | 1.21 ± 0.27                      | 1.22 ± 0.28                     | 1.59 ± 0.50                       | GC/MS     |         |         |
| X-05907     | 1.20 ± 0.12  | 1.07 ± 0.07         | 0.67 ± 0.09*          | 1.05 ± 0.10  | 1.07 ± 0.08          | 0.76 ± 0.08            | 1.05 ± 0.10                    | 0.62 ± 0.11*                     | 1.10 ± 0.13                     | 0.78 ± 0.13                       | GC/MS     |         |         |
| X-06126     | 1.01 ± 0.27  | 2.05 ± 0.31         | 2.99 ± 1.00           | 0.78 ± 0.21  | 2.17 ± 0.46          | 4.32 ± 1.48            | 1.41 ± 0.38                    | 1.68 ± 0.67                      | 1.93 ± 0.42                     | 1.46 ± 0.51                       | LC/MS neg |         |         |
| X-06246     | 1.22 ± 0.17  | 0.96 ± 0.06         | 0.64 ± 0.07*          | 1.08 ± 0.10* | 0.82 ± 0.05          | 0.65 ± 0.05            | N/D                            | N/D                              | 0.96 ± 0.08                     | 0.79 ± 0.10                       | GC/MS     |         |         |
| X-06267     | 1.29 ± 0.26  | 0.99 ± 0.15         | 0.95 ± 0.17           | 0.96 ± 0.15  | 0.85 ± 0.07          | 0.74 ± 0.09            | N/D                            | N/D                              | 0.94 ± 0.09                     | 0.70 ± 0.10                       | GC/MS     |         |         |
| X-06268     | 1.07 ± 0.18  | 0.98 ± 0.08         | 1.17 ± 0.18           | 1.00 ± 0.12  | 0.72 ± 0.07          | 0.66 ± 0.10            | N/D                            | N/D                              | N/D                             | N/D                               | GC/MS     |         |         |
| X-06346     | 1.22 ± 0.09  | 1.17 ± 0.05         | 0.94 ± 0.06           | 1.11 ± 0.09  | 1.10 ± 0.05          | 0.84 ± 0.07            | 0.87 ± 0.07                    | 0.83 ± 0.07                      | 1.13 ± 0.09                     | 0.94 ± 0.07                       | GC/MS     |         |         |
| X-06350     | 0.98 ± 0.12  | 0.93 ± 0.07         | 0.78 ± 0.09           | N/D          | N/D                  | N/D                    | 0.88 ± 0.08                    | 0.69 ± 0.08                      | 0.99 ± 0.10                     | 1.01 ± 0.15                       | GC/MS     |         |         |
| X-06351     | 1.08 ± 0.26  | 1.09 ± 0.11         | 1.45 ± 0.33           | N/D          | N/D                  | N/D                    | N/D                            | N/D                              | N/D                             | N/D                               | GC/MS     |         |         |
| X-06906     | N/D          | N/D                 | N/D                   | N/D          | N/D                  | N/D                    | 1.14 ± 0.23                    | 1.38 ± 0.42                      | 1.36 ± 0.37                     | 1.33 ± 0.32                       | GC/MS     |         |         |
| X-07765     | 1.18 ± 0.22  | 2.01 ± 0.36         | 0.62 ± 0.23*          | 1.61 ± 0.31  | 2.39 ± 0.56          | 0.84 ± 0.30            | 2.12 ± 0.57                    | 1.78 ± 0.53                      | 2.07 ± 0.62                     | 1.37 ± 0.41                       | LC/MS neg |         |         |
| X-08402     | 1.26 ± 0.07  | 1.11 ± 0.08         | 0.85 ± 0.07           | 1.18 ± 0.09  | 1.17 ± 0.08          | 0.94 ± 0.08            | 1.08 ± 0.10                    | 0.93 ± 0.11                      | 1.23 ± 0.15                     | 0.98 ± 0.11                       | GC/MS     |         |         |
| X-08889     | 1.43 ± 0.19  | 1.15 ± 0.10         | 1.28 ± 0.15           | 1.19 ± 0.15  | 1.18 ± 0.11          | 1.26 ± 0.15            | 0.86 ± 0.10                    | 0.78 ± 0.10                      | 0.96 ± 0.16                     | 0.90 ± 0.17                       | GC/MS     |         |         |
| X-08988     | N/D          | N/D                 | N/D                   | N/D          | N/D                  | N/D                    | 1.04 ± 0.08                    | 1.03 ± 0.11                      | 1.03 ± 0.08                     | 1.08 ± 0.08                       | GC/MS     |         |         |
| X-09026     | 1.49 ± 0.16  | 1.39 ± 0.12         | 0.65 ± 0.08*          | N/D          | N/D                  | N/D                    | N/D                            | N/D                              | 1.13 ± 0.10                     | 0.89 ± 0.14                       | GC/MS     |         |         |
| X-09044     | 2.23 ± 0.48* | 1.03 ± 0.11         | 1.34 ± 0.20           | N/D          | N/D                  | N/D                    | N/D                            | N/D                              | N/D                             | N/D                               | GC/MS     |         |         |
| X-09108     | 1.23 ± 0.14  | 1.01 ± 0.05         | 1.21 ± 0.19           | N/D          | N/D                  | N/D                    | N/D                            | N/D                              | 1.01 ± 0.07                     | 0.79 ± 0.11                       | GC/MS     |         |         |
| X-09789     | 1.81 ± 0.50  | 1.19 ± 0.14         | 0.68 ± 0.12           | 1.74 ± 0.51  | 1.09 ± 0.14          | 0.83 ± 0.19            | 0.92 ± 0.14                    | 1.27 ± 0.33                      | 0.90 ± 0.15                     | 0.96 ± 0.23                       | LC/MS neg |         |         |
| X-10266     | 1.55 ± 0.31  | 2.01 ± 0.54         | 1.37 ± 0.19           | 1.08 ± 0.26  | 1.28 ± 0.27          | 1.19 ± 0.23            | 0.89 ± 0.17                    | 0.84 ± 0.16                      | 1.09 ± 0.24                     | 0.96 ± 0.15                       | GC/MS     |         |         |
| X-10346     | N/D          | N/D                 | N/D                   | N/D          | N/D                  | N/D                    | N/D                            | N/D                              | 1.78 ± 0.65                     | 7.90 ± 3.69                       | LC/MS neg |         |         |
| X-10359     | 2.05 ± 0.65  | 1.98 ± 0.32         | 1.79 ± 0.46           | 1.75 ± 0.46  | 1.75 ± 0.39          | 1.90 ± 0.48*           | 1.22 ± 0.24                    | 1.62 ± 0.46                      | 2.10 ± 0.49                     | 2.26 ± 0.69                       | GC/MS     |         |         |
| X-10395     | 1.65 ± 0.22  | 1.32 ± 0.10         | 0.50 ± 0.07*          | 1.50 ± 0.15  | 1.30 ± 0.10          | 0.76 ± 0.07*           | 1.16 ± 0.10                    | 0.79 ± 0.16                      | 1.25 ± 0.12                     | 0.85 ± 0.17                       | GC/MS     |         |         |
| X-10429     | 1.35 ± 0.13  | 1.14 ± 0.08         | 0.56 ± 0.07*          | N/D          | N/D                  | N/D                    | N/D                            | N/D                              | 0.87 ± 0.09                     | 0.63 ± 0.16                       | GC/MS     |         |         |
| X-10438     | 1.26 ± 0.20* | 0.78 ± 0.08         | 0.96 ± 0.15           | N/D          | N/D                  | N/D                    | N/D                            | N/D                              | N/D                             | N/D                               | GC/MS     |         |         |
| X-10439     | 2.08 ± 0.49* | 0.98 ± 0.10         | 1.50 ± 0.27           | 1.22 ± 0.24  | 0.67 ± 0.07          | 0.83 ± 0.18            | N/D                            | N/D                              | 0.87 ± 0.11                     | 1.06 ± 0.17                       | GC/MS     |         |         |
| X-10483     | 1.01 ± 0.22  | 1.28 ± 0.15         | 1.76 ± 0.28*          | 0.70 ± 0.12  | 1.10 ± 0.19          | 1.60 ± 0.22*           | 1.08 ± 0.16                    | 1.72 ± 0.41                      | 1.04 ± 0.19                     | 1.41 ± 0.32                       | GC/MS     |         |         |
| X-10500     | 1.15 ± 0.04  | 1.04 ± 0.04         | 0.91 ± 0.07           | 1.04 ± 0.06  | 0.96 ± 0.05          | 0.84 ± 0.10            | 1.13 ± 0.08                    | 0.89 ± 0.07                      | 1.15 ± 0.09                     | 1.00 ± 0.06                       | GC/MS     |         |         |
| X-10510     | 1.31 ± 0.08  | 1.14 ± 0.06         | 1.04 ± 0.08           | 1.14 ± 0.09  | 1.10 ± 0.05          | 0.96 ± 0.09            | 1.02 ± 0.09                    | 1.05 ± 0.16                      | 1.20 ± 0.15                     | 0.99 ± 0.10                       | GC/MS     |         |         |
| X-10593     | N/D          | N/D                 | N/D                   | N/D          | N/D                  | N/D                    | N/D                            | N/D                              | 0.89 ± 0.08                     | 1.00 ± 0.24                       | LC/MS pos |         |         |
| X-10595     | N/D          | N/D                 | N/D                   | N/D          | N/D                  | N/D                    | 0.94 ± 0.07                    | 0.97 ± 0.09                      | N/D                             | N/D                               | GC/MS     |         |         |
| X-10609     | N/D          | N/D                 | N/D                   | N/D          | N/D                  | N/D                    | 1.07 ± 0.15                    | 1.03 ± 0.15                      | N/D                             | N/D                               | GC/MS     |         |         |
| X-10744     | 1.19 ± 0.06  | 1.03 ± 0.04         | 0.99 ± 0.07           | 1.06 ± 0.06  | 1.01 ± 0.04          | 0.97 ± 0.07            | 1.05 ± 0.07                    | 0.92 ± 0.08                      | N/D                             | N/D                               | GC/MS     |         |         |
| X-10747     | N/D          | N/D                 | N/D                   | N/D          | N/D                  | N/D                    | 0.97 ± 0.12                    | 3.99 ± 3.21                      | 1.32 ± 0.25                     | 0.99 ± 0.18                       | GC/MS     |         |         |
| X-10752     | 1.80 ± 0.33  | 1.41 ± 0.15         | 0.81 ± 0.08*          | 1.14 ± 0.14  | 1.27 ± 0.25          | 0.96 ± 0.10            | 1.38 ± 0.23                    | 1.02 ± 0.10                      | 1.20 ± 0.15                     | 1.01 ± 0.17                       | GC/MS     |         |         |

| Biochemical                       | t0 SIRS+     | t0 Sepsis Survivors | t0 sepsis nonsurvivor | t24 SIRS+    | t24 Sepsis Survivors | t24 sepsis nonsurvivor | validation t0 Sepsis Survivors | Validation t0 sepsis nonsurvivor | Validation t24 Sepsis Survivors | Validation t24 sepsis nonsurvivor | PLATFORM  | KEGG ID | HMDB ID |
|-----------------------------------|--------------|---------------------|-----------------------|--------------|----------------------|------------------------|--------------------------------|----------------------------------|---------------------------------|-----------------------------------|-----------|---------|---------|
| X-10876                           | N/D          | N/D                 | N/D                   | N/D          | N/D                  | N/D                    | 0.99 ± 0.06                    | 0.94 ± 0.08                      | 1.13 ± 0.08                     | 1.00 ± 0.06                       | GC/MS     |         |         |
| X-10933                           | N/D          | N/D                 | N/D                   | 0.91 ± 0.09  | 0.94 ± 0.08          | 1.03 ± 0.10            | N/D                            | N/D                              | 1.10 ± 0.13                     | 0.87 ± 0.09                       | GC/MS     |         |         |
| X-10964                           | 1.31 ± 0.19* | 0.78 ± 0.05         | 0.75 ± 0.09           | N/D          | N/D                  | N/D                    | 0.71 ± 0.10                    | 0.59 ± 0.13                      | N/D                             | N/D                               | GC/MS     |         |         |
| X-11168                           | 1.49 ± 0.49  | 1.20 ± 0.13         | 1.09 ± 0.15           | N/D          | N/D                  | N/D                    | N/D                            | N/D                              | 0.99 ± 0.21                     | 0.81 ± 0.17                       | GC/MS     |         |         |
| X-11175                           | 2.01 ± 0.38* | 1.20 ± 0.10         | 1.57 ± 0.21           | 0.95 ± 0.16  | 1.14 ± 0.16          | 2.20 ± 0.74*           | 1.23 ± 0.12                    | 1.20 ± 0.26                      | 1.14 ± 0.19                     | 1.25 ± 0.27                       | GC/MS     |         |         |
| X-11204                           | 1.02 ± 0.05  | 1.02 ± 0.03         | 0.93 ± 0.05           | 1.07 ± 0.05  | 0.99 ± 0.03          | 0.91 ± 0.04            | 0.94 ± 0.04                    | 0.90 ± 0.06                      | 1.09 ± 0.05                     | 0.99 ± 0.06                       | LC/MS pos |         |         |
| X-11206                           | 1.00 ± 0.03  | 0.93 ± 0.02         | 0.91 ± 0.04           | 0.97 ± 0.04  | 0.97 ± 0.02          | 0.92 ± 0.04            | N/D                            | N/D                              | N/D                             | N/D                               | LC/MS pos |         |         |
| X-11231                           | N/D          | N/D                 | N/D                   | 1.34 ± 0.20  | 1.26 ± 0.20          | 1.16 ± 0.15            | N/D                            | N/D                              | N/D                             | N/D                               | LC/MS neg |         |         |
| X-11244                           | 1.36 ± 0.37  | 2.02 ± 0.30         | 1.85 ± 0.41           | 1.53 ± 0.53  | 1.76 ± 0.23          | 2.35 ± 0.68            | 2.16 ± 0.54                    | 1.69 ± 0.67                      | 2.00 ± 0.36                     | 1.82 ± 0.56                       | LC/MS neg |         |         |
| X-11245                           | 0.86 ± 0.14* | 1.82 ± 0.23         | 1.54 ± 0.28           | 0.82 ± 0.15  | 1.51 ± 0.19          | 1.61 ± 0.24            | 1.72 ± 0.25                    | 1.44 ± 0.49                      | 1.58 ± 0.26                     | 1.31 ± 0.27                       | LC/MS neg |         |         |
| X-11255                           | 1.86 ± 0.62  | 1.91 ± 0.33         | 0.81 ± 0.23           | 1.61 ± 0.46  | 1.33 ± 0.19          | 0.74 ± 0.20            | 0.99 ± 0.20                    | 0.74 ± 0.22                      | 1.37 ± 0.37                     | 0.83 ± 0.26                       | LC/MS pos |         |         |
| X-11261                           | 1.54 ± 0.23  | 1.48 ± 0.15         | 1.46 ± 0.27           | 1.27 ± 0.22  | 1.24 ± 0.13          | 1.11 ± 0.15            | 1.10 ± 0.14                    | 1.45 ± 0.34                      | 1.28 ± 0.17                     | 1.50 ± 0.36                       | LC/MS pos |         |         |
| X-11273                           | 0.75 ± 0.18* | 2.07 ± 0.31         | 1.92 ± 0.40           | 1.10 ± 0.50  | 2.11 ± 0.34          | 2.45 ± 0.51            | 1.66 ± 0.36                    | 1.09 ± 0.16                      | 1.46 ± 0.31                     | 1.71 ± 0.48                       | LC/MS neg |         |         |
| X-11282                           | 0.95 ± 0.15  | 1.16 ± 0.12         | 1.21 ± 0.20           | 1.24 ± 0.21  | 1.24 ± 0.13          | 2.43 ± 0.61*           | 1.29 ± 0.17                    | 1.67 ± 0.47                      | 1.21 ± 0.15                     | 1.48 ± 0.29                       | LC/MS neg |         |         |
| X-11299                           | 1.50 ± 0.23  | 1.20 ± 0.16         | 1.62 ± 0.58           | 2.03 ± 0.30  | 1.66 ± 0.29          | 2.33 ± 0.99            | 2.30 ± 0.88                    | 1.40 ± 0.33                      | 1.93 ± 0.63                     | 1.34 ± 0.30                       | LC/MS neg |         |         |
| X-11302                           | 0.78 ± 0.12* | 2.40 ± 0.35         | 1.07 ± 0.17*          | 0.86 ± 0.19* | 1.80 ± 0.27          | 1.44 ± 0.21            | 2.58 ± 0.43                    | 1.62 ± 0.50                      | 2.15 ± 0.43                     | 1.90 ± 0.65                       | LC/MS neg |         |         |
| X-11303                           | 1.07 ± 0.22  | 1.73 ± 0.31         | 1.78 ± 0.50           | 1.17 ± 0.28  | 2.61 ± 0.55          | 2.55 ± 0.70            | 2.57 ± 0.85                    | 3.42 ± 1.70                      | 1.79 ± 0.43                     | 2.80 ± 1.28                       | LC/MS neg |         |         |
| X-11308                           | 1.35 ± 0.33  | 1.10 ± 0.15         | 1.00 ± 0.17           | 1.18 ± 0.18  | 0.99 ± 0.09          | 1.14 ± 0.13            | 1.27 ± 0.17                    | 1.03 ± 0.18                      | 1.20 ± 0.15                     | 1.16 ± 0.29                       | LC/MS neg |         |         |
| X-11315                           | 0.96 ± 0.10  | 0.92 ± 0.06         | 1.05 ± 0.08           | 1.01 ± 0.10  | 0.88 ± 0.06          | 0.98 ± 0.09            | 0.93 ± 0.12                    | 1.14 ± 0.13                      | 0.87 ± 0.09                     | 0.98 ± 0.14                       | LC/MS pos |         |         |
| X-11317                           | 1.13 ± 0.08  | 1.11 ± 0.06         | 0.99 ± 0.09           | 1.03 ± 0.10  | 1.17 ± 0.06          | 1.02 ± 0.10            | N/D                            | N/D                              | 1.14 ± 0.07                     | 0.95 ± 0.10                       | LC/MS neg |         |         |
| X-11327                           | 1.09 ± 0.06  | 1.00 ± 0.04         | 0.97 ± 0.08           | 1.03 ± 0.05  | 1.00 ± 0.03          | 0.88 ± 0.05            | 0.82 ± 0.08                    | 1.00 ± 0.11                      | 1.11 ± 0.06                     | 1.00 ± 0.05                       | LC/MS pos |         |         |
| X-11333                           | N/D          | N/D                 | N/D                   | 1.38 ± 0.39  | 1.71 ± 0.64          | 2.38 ± 1.00*           | 1.05 ± 0.28                    | 1.77 ± 0.64                      | 1.35 ± 0.38                     | 1.29 ± 0.48                       | LC/MS pos |         |         |
| X-11334                           | 1.26 ± 0.34  | 1.49 ± 0.27         | 1.31 ± 0.30           | 1.58 ± 0.55  | 1.63 ± 0.30          | 1.64 ± 0.23*           | 1.84 ± 0.35                    | 2.20 ± 0.67                      | 1.78 ± 0.34                     | 1.57 ± 0.46                       | LC/MS pos |         |         |
| X-11341                           | N/D          | N/D                 | N/D                   | N/D          | N/D                  | N/D                    | 0.82 ± 0.13                    | 1.45 ± 0.36                      | 1.18 ± 0.19                     | 1.24 ± 0.21                       | LC/MS pos |         |         |
| X-11372                           | N/D          | N/D                 | N/D                   | N/D          | N/D                  | N/D                    | 1.23 ± 0.17                    | 1.01 ± 0.16                      | 1.14 ± 0.12                     | 1.09 ± 0.18                       | LC/MS neg |         |         |
| X-11381                           | 1.22 ± 0.13  | 1.05 ± 0.07         | 1.69 ± 0.21*          | 1.01 ± 0.12  | 0.83 ± 0.05          | 1.67 ± 0.28*           | 0.92 ± 0.08                    | 1.27 ± 0.28                      | 1.00 ± 0.07                     | 1.14 ± 0.17                       | LC/MS pos |         |         |
| X-11400                           | N/D          | N/D                 | N/D                   | 3.06 ± 1.64  | 2.71 ± 0.54          | 2.31 ± 1.02            | N/D                            | N/D                              | 3.83 ± 1.37                     | 1.56 ± 0.45                       | LC/MS pos |         |         |
| X-11412                           | N/D          | N/D                 | N/D                   | 1.04 ± 0.08  | 1.14 ± 0.05          | 0.82 ± 0.08*           | N/D                            | N/D                              | N/D                             | N/D                               | LC/MS pos |         |         |
| X-11421 (4-cis decenoylcarnitine) | 1.34 ± 0.16  | 1.04 ± 0.10         | 2.21 ± 0.39*          | 1.16 ± 0.25  | 1.19 ± 0.12          | 2.30 ± 0.35*           | 0.96 ± 0.11                    | 1.66 ± 0.26*                     | 0.99 ± 0.11                     | 1.91 ± 0.36*                      | LC/MS pos |         |         |
| X-11422                           | N/D          | N/D                 | N/D                   | 1.08 ± 0.14  | 1.09 ± 0.08          | 1.09 ± 0.15            | N/D                            | N/D                              | 1.68 ± 0.43                     | 1.17 ± 0.18                       | LC/MS neg |         |         |
| X-11423                           | 1.70 ± 0.36  | 1.74 ± 0.19         | 1.81 ± 0.24           | 1.55 ± 0.32  | 1.69 ± 0.27          | 2.27 ± 0.34*           | 1.41 ± 0.21                    | 1.83 ± 0.37                      | 1.78 ± 0.34                     | 2.20 ± 0.72                       | LC/MS neg |         |         |
| X-11429                           | 1.18 ± 0.32  | 1.12 ± 0.15         | 1.64 ± 0.38*          | 1.38 ± 0.34  | 1.41 ± 0.20          | 2.01 ± 0.31*           | 1.61 ± 0.32                    | 2.24 ± 0.48                      | 1.43 ± 0.26                     | 1.83 ± 0.44                       | LC/MS neg |         |         |
| X-11431                           | N/D          | N/D                 | N/D                   | 1.38 ± 0.21  | 1.27 ± 0.17          | 1.20 ± 0.15            | N/D                            | N/D                              | N/D                             | N/D                               | LC/MS neg |         |         |
| X-11437                           | 1.87 ± 0.49  | 3.05 ± 0.79         | 2.30 ± 0.66           | 7.12 ± 4.30  | 3.86 ± 1.00          | 2.65 ± 0.90            | 3.20 ± 1.03                    | 7.24 ± 6.50                      | 6.25 ± 2.50                     | 9.55 ± 3.93                       | LC/MS neg |         |         |
| X-11438                           | 0.96 ± 0.12  | 0.91 ± 0.07         | 1.05 ± 0.16           | 0.71 ± 0.10  | 0.81 ± 0.07          | 1.32 ± 0.22*           | 0.88 ± 0.09                    | 0.93 ± 0.14                      | 1.04 ± 0.13                     | 1.30 ± 0.37                       | LC/MS neg |         |         |
| X-11440                           | 1.00 ± 0.23* | 2.25 ± 0.30         | 1.66 ± 0.42           | 0.95 ± 0.20  | 2.03 ± 0.32          | 2.20 ± 0.44            | 2.13 ± 0.32                    | 1.13 ± 0.18                      | 2.33 ± 0.44                     | 1.24 ± 0.22                       | LC/MS neg |         |         |
| X-11441                           | N/D          | N/D                 | N/D                   | 1.21 ± 0.23  | 0.98 ± 0.13          | 2.05 ± 0.52*           | 1.11 ± 0.13                    | 1.29 ± 0.45                      | 1.01 ± 0.17                     | 1.46 ± 0.32                       | LC/MS neg |         |         |
| X-11442                           | N/D          | N/D                 | N/D                   | 1.31 ± 0.25  | 1.07 ± 0.15          | 2.26 ± 0.53*           | 1.05 ± 0.11                    | 1.10 ± 0.39                      | 0.94 ± 0.15                     | 1.36 ± 0.28                       | LC/MS neg |         |         |
| X-11443                           | 1.01 ± 0.33  | 1.35 ± 0.22         | 1.16 ± 0.34           | 1.65 ± 0.55  | 1.91 ± 0.33          | 2.32 ± 0.69            | 1.38 ± 0.33                    | 1.18 ± 0.43                      | 1.26 ± 0.24                     | 1.80 ± 0.61                       | LC/MS neg |         |         |
| X-11444                           | 1.80 ± 0.72  | 3.33 ± 0.87         | 1.43 ± 0.46           | 1.73 ± 0.65  | 3.89 ± 1.23          | 1.72 ± 0.37            | 1.71 ± 0.25                    | 1.00 ± 0.23                      | 1.56 ± 0.25                     | 1.79 ± 0.84                       | LC/MS neg |         |         |
| X-11445                           | 0.90 ± 0.23  | 1.84 ± 0.29         | 0.96 ± 0.18           | 0.98 ± 0.22* | 2.26 ± 0.35          | 1.55 ± 0.26            | 1.01 ± 0.23                    | 0.82 ± 0.15                      | 1.41 ± 0.30                     | 1.51 ± 0.36                       | LC/MS neg |         |         |
| X-11450                           | 1.09 ± 0.18  | 1.53 ± 0.17         | 1.47 ± 0.23           | 1.23 ± 0.24  | 1.47 ± 0.17          | 1.77 ± 0.27            | 1.42 ± 0.22                    | 1.30 ± 0.31                      | 1.33 ± 0.18                     | 1.25 ± 0.28                       | LC/MS neg |         |         |
| X-11452                           | 0.99 ± 0.28  | 0.88 ± 0.11         | 0.53 ± 0.13           | 1.43 ± 0.33  | 1.02 ± 0.14          | 0.60 ± 0.15            | N/D                            | N/D                              | 1.29 ± 0.30                     | 0.42 ± 0.09*                      | LC/MS neg |         |         |
| X-11469                           | N/D          | N/D                 | N/D                   | 1.67 ± 0.50  | 1.41 ± 0.26          | 0.88 ± 0.17            | 1.86 ± 0.50                    | 0.87 ± 0.14                      | N/D                             | N/D                               | LC/MS pos |         |         |
| X-11470                           | 0.84 ± 0.22  | 1.83 ± 0.34         | 0.73 ± 0.18*          | 1.30 ± 0.35  | 2.13 ± 0.48          | 1.07 ± 0.22            | 1.91 ± 0.34                    | 1.20 ± 0.41                      | 1.74 ± 0.43                     | 1.77 ± 0.80                       | LC/MS neg |         |         |
| X-11476                           | N/D          | N/D                 | N/D                   | 0.96 ± 0.05  | 1.01 ± 0.03          | 1.00 ± 0.05            | N/D                            | N/D                              | 1.05 ± 0.07                     | 0.84 ± 0.07                       | LC/MS pos |         |         |
| X-11478                           | 0.87 ± 0.10  | 0.92 ± 0.07         | 0.68 ± 0.09           | 1.03 ± 0.10  | 1.04 ± 0.07          | 1.00 ± 0.12            | 1.44 ± 0.19                    | 0.94 ± 0.13                      | 1.08 ± 0.16                     | 0.89 ± 0.17                       | LC/MS neg |         |         |
| X-11483                           | N/D          | N/D                 | N/D                   | 1.22 ± 0.20  | 1.02 ± 0.12          | 0.85 ± 0.16            | 1.19 ± 0.26                    | 0.84 ± 0.16                      | 0.88 ± 0.15                     | 0.71 ± 0.14                       | LC/MS neg |         |         |
| X-11490                           | 1.33 ± 0.32  | 1.84 ± 0.33         | 1.92 ± 0.42           | 1.51 ± 0.32  | 1.74 ± 0.31          | 6.05 ± 3.12            | 1.64 ± 0.32                    | 2.53 ± 0.71                      | 1.24 ± 0.23                     | 2.22 ± 0.55                       | LC/MS neg |         |         |
| X-11491                           | 1.02 ± 0.22  | 1.21 ± 0.37         | 1.90 ± 0.54           | 1.36 ± 0.21  | 1.37 ± 0.29          | 2.78 ± 0.79            | 1.60 ± 0.38                    | 2.04 ± 0.85                      | 1.19 ± 0.19                     | 1.50 ± 0.39                       | LC/MS neg |         |         |
| X-11497                           | 1.12 ± 0.26  | 1.20 ± 0.09         | 1.09 ± 0.18           | 2.16 ± 0.45  | 1.78 ± 0.22          | 0.92 ± 0.15            | 1.25 ± 0.19                    | 1.08 ± 0.20                      | N/D                             | N/D                               | LC/MS neg |         |         |
| X-11510                           | 1.02 ± 0.18  | 1.16 ± 0.15         | 1.29 ± 0.23           | 0.91 ± 0.16  | 1.12 ± 0.19          | 1.48 ± 0.25            | 1.59 ± 0.35                    | 1.46 ± 0.34                      | 1.39 ± 0.35                     | 1.22 ± 0.28                       | LC/MS neg |         |         |

| Biochemical | t0 SIRS+     | t0 Sepsis Survivors | t0 sepsis nonsurvivor | t24 SIRS+    | t24 Sepsis Survivors | t24 sepsis nonsurvivor | validation t0 Sepsis Survivors | Validation t0 sepsis nonsurvivor | Validation t24 Sepsis Survivors | Validation t24 sepsis nonsurvivor | PLATFORM  | KEGG ID | HMDB ID |
|-------------|--------------|---------------------|-----------------------|--------------|----------------------|------------------------|--------------------------------|----------------------------------|---------------------------------|-----------------------------------|-----------|---------|---------|
| X-11513     | N/D          | N/D                 | N/D                   | 1.03 ± 0.18  | 0.92 ± 0.15          | 0.82 ± 0.25            | 0.81 ± 0.20                    | 3.40 ± 1.63                      | 0.60 ± 0.12                     | 1.41 ± 0.43                       | LC/MS pos |         |         |
| X-11521     | 1.24 ± 0.18  | 1.30 ± 0.22         | 1.95 ± 0.32           | 1.18 ± 0.15  | 1.15 ± 0.14          | 2.17 ± 0.38*           | 1.02 ± 0.15                    | 1.28 ± 0.27                      | 1.28 ± 0.17                     | 1.50 ± 0.36                       | LC/MS pos |         |         |
| X-11522     | N/D          | N/D                 | N/D                   | 1.10 ± 0.23  | 0.91 ± 0.11          | 3.37 ± 1.16*           | N/D                            | N/D                              | 1.35 ± 0.22                     | 2.50 ± 0.77                       | LC/MS neg |         |         |
| X-11529     | 1.52 ± 0.33  | 1.50 ± 0.19         | 1.68 ± 0.49           | 1.46 ± 0.32  | 1.63 ± 0.22          | 1.47 ± 0.38            | 2.48 ± 0.69                    | 2.56 ± 0.76                      | 2.43 ± 0.71                     | 2.50 ± 0.76                       | LC/MS neg |         |         |
| X-11530     | N/D          | N/D                 | N/D                   | 1.10 ± 0.19  | 0.98 ± 0.14          | 3.00 ± 0.85*           | 0.99 ± 0.11                    | 1.42 ± 0.45                      | 1.24 ± 0.20                     | 2.71 ± 1.15                       | LC/MS neg |         |         |
| X-11533     | N/D          | N/D                 | N/D                   | 1.01 ± 0.02  | 0.99 ± 0.01          | 1.03 ± 0.02            | N/D                            | N/D                              | 1.09 ± 0.07                     | 1.00 ± 0.02                       | LC/MS neg |         |         |
| X-11537     | N/D          | N/D                 | N/D                   | N/D          | N/D                  | N/D                    | 0.91 ± 0.15                    | 0.74 ± 0.12                      | 0.83 ± 0.10                     | 0.66 ± 0.13                       | LC/MS pos |         |         |
| X-11538     | 1.74 ± 0.41  | 1.64 ± 0.21         | 4.37 ± 0.94*          | 1.67 ± 0.55  | 1.38 ± 0.13          | 4.69 ± 1.59*           | 1.08 ± 0.14                    | 3.54 ± 1.52*                     | 1.38 ± 0.43                     | 8.24 ± 5.53*                      | LC/MS neg |         |         |
| X-11542     | N/D          | N/D                 | N/D                   | 1.01 ± 0.03  | 0.96 ± 0.02          | 1.01 ± 0.02            | N/D                            | N/D                              | N/D                             | N/D                               | LC/MS pos |         |         |
| X-11546     | 1.28 ± 0.33  | 3.86 ± 2.50         | 1.49 ± 0.35           | 1.63 ± 0.50  | 4.57 ± 2.67          | 1.71 ± 0.38            | 1.47 ± 0.37                    | 4.83 ± 1.47*                     | 1.35 ± 0.51                     | 4.60 ± 1.72*                      | LC/MS neg |         |         |
| X-11550     | 0.96 ± 0.06  | 1.04 ± 0.04         | 0.92 ± 0.07           | 1.06 ± 0.10  | 1.11 ± 0.07          | 1.03 ± 0.17            | 1.09 ± 0.08                    | 0.91 ± 0.12                      | 1.03 ± 0.06                     | 0.83 ± 0.09                       | LC/MS neg |         |         |
| X-11560     | N/D          | N/D                 | N/D                   | N/D          | N/D                  | N/D                    | 1.01 ± 0.11                    | 0.95 ± 0.13                      | N/D                             | N/D                               | LC/MS neg |         |         |
| X-11564     | N/D          | N/D                 | N/D                   | 1.21 ± 0.29  | 1.16 ± 0.17          | 1.25 ± 0.15*           | 1.10 ± 0.20                    | 1.16 ± 0.27                      | 1.77 ± 0.32                     | 2.20 ± 0.52                       | LC/MS neg |         |         |
| X-11593     | 1.16 ± 0.23  | 1.81 ± 0.23         | 1.63 ± 0.22           | 1.18 ± 0.19  | 1.32 ± 0.15          | 1.49 ± 0.13*           | 1.35 ± 0.20                    | 1.35 ± 0.25                      | 1.25 ± 0.19                     | 1.17 ± 0.23                       | LC/MS neg |         |         |
| X-11687     | 1.25 ± 0.40  | 1.10 ± 0.14         | 1.46 ± 0.26*          | 1.40 ± 0.38  | 1.66 ± 0.31          | 2.83 ± 0.78*           | 1.54 ± 0.25                    | 2.60 ± 0.75                      | 1.40 ± 0.33                     | 1.54 ± 0.40                       | LC/MS pos |         |         |
| X-11727     | 1.31 ± 0.16  | 1.26 ± 0.10         | 0.97 ± 0.14           | 1.05 ± 0.10  | 1.13 ± 0.10          | 1.27 ± 0.12            | 1.26 ± 0.18                    | 1.22 ± 0.17                      | 1.31 ± 0.20                     | 1.08 ± 0.16                       | LC/MS pos |         |         |
| X-11786     | 1.27 ± 0.18  | 0.88 ± 0.08         | 0.87 ± 0.14           | 1.44 ± 0.13* | 0.94 ± 0.07          | 0.90 ± 0.11            | 1.04 ± 0.10                    | 1.24 ± 0.18                      | 1.08 ± 0.10                     | 1.18 ± 0.15                       | LC/MS pos |         |         |
| X-11787     | 1.11 ± 0.09  | 0.99 ± 0.04         | 1.04 ± 0.11           | 1.09 ± 0.06  | 0.98 ± 0.04          | 1.05 ± 0.12            | 1.09 ± 0.10                    | 0.89 ± 0.12                      | 1.11 ± 0.08                     | 0.81 ± 0.08                       | LC/MS pos |         |         |
| X-11793     | 0.90 ± 0.11  | 1.19 ± 0.11         | 0.89 ± 0.09           | 1.02 ± 0.16  | 1.14 ± 0.11          | 1.24 ± 0.14            | 1.33 ± 0.13                    | 1.11 ± 0.27                      | 1.13 ± 0.14                     | 1.33 ± 0.24                       | LC/MS pos |         |         |
| X-11795     | 0.85 ± 0.16  | 0.87 ± 0.10         | 1.45 ± 0.67           | 1.17 ± 0.24  | 0.90 ± 0.08          | 1.22 ± 0.43            | 0.90 ± 0.12                    | 1.39 ± 0.39                      | 1.14 ± 0.15                     | 1.66 ± 0.44                       | LC/MS pos |         |         |
| X-11799     | N/D          | N/D                 | N/D                   | 1.78 ± 0.40  | 1.11 ± 0.14          | 1.18 ± 0.44            | 1.83 ± 0.43                    | 6.80 ± 3.28                      | 0.94 ± 0.16                     | 2.78 ± 1.57                       | LC/MS pos |         |         |
| X-11809     | 1.12 ± 0.13  | 1.18 ± 0.09         | 1.20 ± 0.13           | 0.98 ± 0.08  | 1.15 ± 0.13          | 0.94 ± 0.09            | 0.96 ± 0.06                    | 0.91 ± 0.14                      | 1.09 ± 0.08                     | 0.86 ± 0.09                       | LC/MS pos |         |         |
| X-11818     | N/D          | N/D                 | N/D                   | 1.08 ± 0.13  | 0.85 ± 0.06          | 0.78 ± 0.07            | 1.02 ± 0.10                    | 0.80 ± 0.10                      | 1.01 ± 0.08                     | 0.97 ± 0.12                       | LC/MS pos |         |         |
| X-11826     | 1.19 ± 0.31  | 6.17 ± 2.62         | 3.51 ± 1.39           | 3.07 ± 2.10  | 4.92 ± 1.97          | 3.38 ± 1.72            | 2.70 ± 0.90                    | 2.38 ± 1.28                      | 3.86 ± 1.32                     | 3.43 ± 2.08                       | LC/MS neg |         |         |
| X-11832     | N/D          | N/D                 | N/D                   | 0.52 ± 0.20  | 1.61 ± 0.45          | 2.49 ± 1.05            | N/D                            | N/D                              | 1.17 ± 0.39                     | 1.03 ± 0.31                       | LC/MS neg |         |         |
| X-11837     | N/D          | N/D                 | N/D                   | N/D          | N/D                  | N/D                    | 1.55 ± 0.54                    | 2.50 ± 1.47                      | 1.56 ± 0.49                     | 1.41 ± 0.82                       | LC/MS pos |         |         |
| X-11838     | 0.92 ± 0.30  | 1.51 ± 0.24         | 1.62 ± 0.52           | 0.55 ± 0.26* | 1.90 ± 0.28          | 1.37 ± 0.44            | 3.22 ± 0.94                    | 1.74 ± 0.55                      | 3.59 ± 0.92                     | 2.34 ± 0.94                       | LC/MS neg |         |         |
| X-11843     | 0.69 ± 0.19  | 1.62 ± 0.51         | 1.85 ± 0.73           | 1.14 ± 0.41  | 1.31 ± 0.39          | 3.68 ± 1.21*           | 0.96 ± 0.19                    | 1.97 ± 1.23                      | 1.77 ± 0.52                     | 1.80 ± 1.11                       | LC/MS neg |         |         |
| X-11845     | N/D          | N/D                 | N/D                   | N/D          | N/D                  | N/D                    | N/D                            | N/D                              | 1.84 ± 1.06                     | 0.57 ± 0.14                       | LC/MS neg |         |         |
| X-11847     | N/D          | N/D                 | N/D                   | N/D          | N/D                  | N/D                    | N/D                            | N/D                              | 2.93 ± 1.13                     | 1.52 ± 0.82                       | LC/MS neg |         |         |
| X-11849     | N/D          | N/D                 | N/D                   | N/D          | N/D                  | N/D                    | N/D                            | N/D                              | 5.73 ± 3.65                     | 0.49 ± 0.10                       | LC/MS neg |         |         |
| X-11850     | 1.50 ± 0.70  | 1.91 ± 0.63         | 1.20 ± 0.39           | 1.48 ± 0.49  | 1.52 ± 0.43          | 2.28 ± 0.62            | 1.73 ± 0.63                    | 1.27 ± 0.65                      | 1.89 ± 0.57                     | 1.12 ± 0.53                       | LC/MS neg |         |         |
| X-11853     | 0.96 ± 0.05  | 0.99 ± 0.03         | 1.00 ± 0.06           | 0.96 ± 0.04  | 0.99 ± 0.03          | 0.96 ± 0.06            | N/D                            | N/D                              | N/D                             | N/D                               | LC/MS neg |         |         |
| X-11859     | 0.99 ± 0.05  | 1.01 ± 0.03         | 0.93 ± 0.05           | 1.01 ± 0.08  | 0.99 ± 0.05          | 0.86 ± 0.08            | N/D                            | N/D                              | 1.08 ± 0.07                     | 0.87 ± 0.09                       | LC/MS neg |         |         |
| X-11861     | N/D          | N/D                 | N/D                   | 1.07 ± 0.06  | 0.99 ± 0.03          | 1.03 ± 0.04            | N/D                            | N/D                              | 1.15 ± 0.11                     | 0.98 ± 0.03                       | LC/MS neg |         |         |
| X-11868     | N/D          | N/D                 | N/D                   | 0.95 ± 0.06  | 0.94 ± 0.03          | 1.06 ± 0.05            | N/D                            | N/D                              | 0.81 ± 0.07                     | 0.78 ± 0.07                       | LC/MS neg |         |         |
| X-11880     | 1.40 ± 0.17  | 1.28 ± 0.14         | 1.16 ± 0.30           | 1.44 ± 0.28  | 1.12 ± 0.14          | 0.94 ± 0.20            | 1.37 ± 0.20                    | 1.23 ± 0.23                      | 1.28 ± 0.16                     | 1.22 ± 0.31                       | LC/MS neg |         |         |
| X-11903     | N/D          | N/D                 | N/D                   | N/D          | N/D                  | N/D                    | 1.34 ± 0.48                    | 1.81 ± 1.04                      | 1.53 ± 0.54                     | 1.64 ± 1.18                       | LC/MS neg |         |         |
| X-11945     | N/D          | N/D                 | N/D                   | 0.79 ± 0.17  | 1.24 ± 0.19          | 1.44 ± 0.24*           | 1.69 ± 0.36                    | 1.55 ± 0.41                      | 1.66 ± 0.36                     | 1.57 ± 0.44                       | LC/MS pos |         |         |
| X-11977     | N/D          | N/D                 | N/D                   | 0.97 ± 0.18  | 1.28 ± 0.13          | 1.52 ± 0.27            | 1.47 ± 0.21                    | 1.28 ± 0.17                      | 0.97 ± 0.10                     | 0.75 ± 0.08                       | LC/MS pos |         |         |
| X-12007     | N/D          | N/D                 | N/D                   | 2.33 ± 0.99  | 1.84 ± 0.40          | 1.03 ± 0.20            | N/D                            | N/D                              | 2.54 ± 0.99                     | 1.26 ± 0.43                       | LC/MS neg |         |         |
| X-12029     | 0.90 ± 0.04  | 1.00 ± 0.02         | 0.88 ± 0.05           | 1.09 ± 0.05  | 1.01 ± 0.03          | 0.97 ± 0.06            | N/D                            | N/D                              | 1.02 ± 0.03                     | 0.93 ± 0.04                       | LC/MS neg |         |         |
| X-12038     | 1.18 ± 0.13  | 1.15 ± 0.07         | 0.92 ± 0.09           | 1.24 ± 0.16  | 1.29 ± 0.10          | 0.84 ± 0.12*           | N/D                            | N/D                              | 1.06 ± 0.10                     | 0.87 ± 0.18                       | LC/MS neg |         |         |
| X-12051     | 1.84 ± 0.28  | 2.07 ± 0.46         | 1.52 ± 0.34           | 1.21 ± 0.12  | 0.96 ± 0.06          | 0.85 ± 0.07            | N/D                            | N/D                              | 1.65 ± 0.23                     | 1.30 ± 0.24                       | LC/MS pos |         |         |
| X-12063     | N/D          | N/D                 | N/D                   | N/D          | N/D                  | N/D                    | 0.90 ± 0.13                    | 0.58 ± 0.10                      | 1.17 ± 0.19                     | 1.36 ± 0.23                       | LC/MS neg |         |         |
| X-12092     | 1.28 ± 0.26  | 1.67 ± 0.21         | 2.17 ± 0.60           | 1.28 ± 0.28  | 1.66 ± 0.23          | 1.82 ± 0.36            | 1.40 ± 0.23                    | 1.77 ± 0.36                      | 1.44 ± 0.24                     | 1.64 ± 0.40                       | LC/MS pos |         |         |
| X-12094     | N/D          | N/D                 | N/D                   | 1.34 ± 0.25  | 1.20 ± 0.17          | 2.38 ± 0.48*           | N/D                            | N/D                              | 1.58 ± 0.31                     | 2.23 ± 0.68                       | LC/MS pos |         |         |
| X-12095     | 1.48 ± 0.23* | 0.98 ± 0.10         | 2.04 ± 0.32*          | 1.36 ± 0.25  | 1.07 ± 0.14          | 1.97 ± 0.39*           | 1.71 ± 0.33                    | 2.24 ± 0.63                      | 1.36 ± 0.22                     | 1.87 ± 0.53                       | LC/MS pos |         |         |
| X-12096     | N/D          | N/D                 | N/D                   | N/D          | N/D                  | N/D                    | 1.07 ± 0.30                    | 1.64 ± 0.63                      | 1.19 ± 0.31                     | 1.11 ± 0.32                       | LC/MS pos |         |         |
| X-12099     | 1.00 ± 0.13  | 1.06 ± 0.08         | 1.36 ± 0.22*          | 1.17 ± 0.10  | 1.06 ± 0.08          | 1.44 ± 0.21*           | N/D                            | N/D                              | N/D                             | N/D                               | LC/MS pos |         |         |
| X-12100     | 1.51 ± 0.32  | 1.70 ± 0.19         | 1.74 ± 0.36           | 1.11 ± 0.20  | 1.44 ± 0.18          | 1.53 ± 0.27            | 1.18 ± 0.15                    | 1.09 ± 0.21                      | 1.12 ± 0.14                     | 1.17 ± 0.22                       | LC/MS pos |         |         |
| X-12101     | 1.63 ± 0.34  | 2.00 ± 0.40         | 2.05 ± 0.49           | 0.92 ± 0.14  | 1.32 ± 0.20          | 1.75 ± 0.36*           | 1.75 ± 0.39                    | 1.52 ± 0.32                      | 1.74 ± 0.34                     | 1.33 ± 0.30                       | LC/MS pos |         |         |

| Biochemical | t0 SIRS+     | t0 Sepsis Survivors | t0 sepsis nonsurvivor | t24 SIRS+    | t24 Sepsis Survivors | t24 sepsis nonsurvivor | validation t0 Sepsis Survivors | Validation t0 sepsis nonsurvivor | Validation t24 Sepsis Survivors | Validation t24 sepsis nonsurvivor | PLATFORM  | KEGG ID | HMDB ID |
|-------------|--------------|---------------------|-----------------------|--------------|----------------------|------------------------|--------------------------------|----------------------------------|---------------------------------|-----------------------------------|-----------|---------|---------|
| X-12104     | 1.00 ± 0.13  | 1.28 ± 0.15         | 1.19 ± 0.16           | 0.90 ± 0.12  | 1.11 ± 0.11          | 1.29 ± 0.20*           | 1.17 ± 0.15                    | 1.32 ± 0.35                      | 1.31 ± 0.20                     | 1.41 ± 0.37                       | LC/MS pos |         |         |
| X-12117     | 1.84 ± 0.62  | 2.77 ± 0.49         | 2.35 ± 0.61           | 1.65 ± 0.55  | 2.47 ± 0.54          | 2.51 ± 0.59*           | 3.12 ± 0.81                    | 4.18 ± 1.47                      | 2.04 ± 0.59                     | 2.08 ± 0.66                       | LC/MS pos |         |         |
| X-12119     | N/D          | N/D                 | N/D                   | N/D          | N/D                  | N/D                    | 0.78 ± 0.14                    | 0.82 ± 0.17                      | 1.22 ± 0.21                     | 1.09 ± 0.23                       | LC/MS pos |         |         |
| X-12125     | N/D          | N/D                 | N/D                   | 1.37 ± 0.40  | 1.47 ± 0.38          | 1.32 ± 0.32            | 1.05 ± 0.30                    | 1.91 ± 0.82                      | 1.26 ± 0.45                     | 1.91 ± 1.17                       | LC/MS pos |         |         |
| X-12127     | N/D          | N/D                 | N/D                   | N/D          | N/D                  | N/D                    | N/D                            | N/D                              | 1.24 ± 0.25                     | 1.03 ± 0.21                       | LC/MS pos |         |         |
| X-12128     | N/D          | N/D                 | N/D                   | N/D          | N/D                  | N/D                    | N/D                            | N/D                              | 0.77 ± 0.06                     | 0.88 ± 0.17                       | LC/MS pos |         |         |
| X-12170     | N/D          | N/D                 | N/D                   | N/D          | N/D                  | N/D                    | 1.16 ± 0.16                    | 1.13 ± 0.35                      | N/D                             | N/D                               | LC/MS pos |         |         |
| X-12173     | N/D          | N/D                 | N/D                   | N/D          | N/D                  | N/D                    | 0.98 ± 0.21                    | 1.31 ± 0.37                      | 1.07 ± 0.25                     | 0.79 ± 0.19                       | LC/MS pos |         |         |
| X-12199     | 1.40 ± 0.42  | 1.38 ± 0.20         | 1.03 ± 0.26           | N/D          | N/D                  | N/D                    | N/D                            | N/D                              | 1.02 ± 0.12                     | 0.60 ± 0.09                       | LC/MS pos |         |         |
| X-12206     | 1.04 ± 0.31  | 1.01 ± 0.19         | 1.17 ± 0.19           | 1.39 ± 0.34  | 1.23 ± 0.20          | 1.58 ± 0.21*           | 0.91 ± 0.17                    | 1.00 ± 0.18                      | 1.90 ± 0.45                     | 1.74 ± 0.51                       | LC/MS neg |         |         |
| X-12216     | N/D          | N/D                 | N/D                   | N/D          | N/D                  | N/D                    | N/D                            | N/D                              | 0.81 ± 0.22                     | 1.59 ± 0.91                       | LC/MS neg |         |         |
| X-12217     | 2.75 ± 1.12  | 2.11 ± 0.45         | 1.13 ± 0.32           | 2.12 ± 1.14  | 5.02 ± 1.59          | 3.69 ± 1.48            | N/D                            | N/D                              | 4.78 ± 1.96                     | 2.67 ± 1.62                       | LC/MS neg |         |         |
| X-12231     | N/D          | N/D                 | N/D                   | N/D          | N/D                  | N/D                    | N/D                            | N/D                              | 1.04 ± 0.23                     | 0.35 ± 0.07*                      | LC/MS neg |         |         |
| X-12244     | N/D          | N/D                 | N/D                   | 1.35 ± 0.28  | 1.44 ± 0.18          | 1.17 ± 0.27            | N/D                            | N/D                              | 1.28 ± 0.16                     | 0.83 ± 0.07                       | LC/MS pos |         |         |
| X-12261     | N/D          | N/D                 | N/D                   | 0.72 ± 0.22  | 0.67 ± 0.11          | 3.07 ± 1.14*           | N/D                            | N/D                              | 1.69 ± 0.49                     | 1.64 ± 0.85                       | LC/MS neg |         |         |
| X-12262     | N/D          | N/D                 | N/D                   | N/D          | N/D                  | N/D                    | N/D                            | N/D                              | 1.06 ± 0.17                     | 1.73 ± 0.78                       | LC/MS neg |         |         |
| X-12358     | N/D          | N/D                 | N/D                   | N/D          | N/D                  | N/D                    | 2.07 ± 0.65                    | 2.95 ± 1.80                      | 1.44 ± 0.32                     | 1.72 ± 0.70                       | LC/MS pos |         |         |
| X-12405     | 1.60 ± 0.55  | 1.96 ± 0.33         | 1.30 ± 0.36           | 0.99 ± 0.24  | 1.82 ± 0.34          | 2.04 ± 0.58            | 1.46 ± 0.32                    | 1.58 ± 0.45                      | 2.19 ± 0.63                     | 1.34 ± 0.34                       | LC/MS neg |         |         |
| X-12421     | N/D          | N/D                 | N/D                   | 1.24 ± 0.19  | 0.90 ± 0.06          | 0.78 ± 0.09            | N/D                            | N/D                              | N/D                             | N/D                               | LC/MS pos |         |         |
| X-12422     | 1.34 ± 0.27  | 1.25 ± 0.20         | 1.11 ± 0.26           | 1.43 ± 0.19  | 1.11 ± 0.09          | 0.94 ± 0.12            | N/D                            | N/D                              | 0.76 ± 0.14                     | 0.61 ± 0.20                       | LC/MS pos |         |         |
| X-12428     | N/D          | N/D                 | N/D                   | 1.05 ± 0.35  | 1.86 ± 0.65          | 1.56 ± 0.61            | 2.03 ± 0.53                    | 1.29 ± 0.63                      | 2.09 ± 0.61                     | 1.91 ± 0.95                       | LC/MS neg |         |         |
| X-12440     | 0.99 ± 0.07  | 0.96 ± 0.04         | 1.01 ± 0.06           | N/D          | N/D                  | N/D                    | N/D                            | N/D                              | 1.48 ± 0.17                     | 0.91 ± 0.16                       | LC/MS neg |         |         |
| X-12442     | 1.81 ± 0.34  | 1.09 ± 0.09         | 1.76 ± 0.32           | 1.38 ± 0.35  | 1.09 ± 0.09          | 1.89 ± 0.39            | 0.99 ± 0.10                    | 1.21 ± 0.14                      | 1.28 ± 0.26                     | 1.70 ± 0.46                       | LC/MS neg |         |         |
| X-12443     | N/D          | N/D                 | N/D                   | 1.65 ± 0.94  | 1.50 ± 0.34          | 0.57 ± 0.12            | N/D                            | N/D                              | 0.61 ± 0.10                     | 0.62 ± 0.12                       | LC/MS neg |         |         |
| X-12450     | 1.54 ± 0.33  | 1.07 ± 0.11         | 1.03 ± 0.15           | N/D          | N/D                  | N/D                    | N/D                            | N/D                              | 1.10 ± 0.07                     | 1.07 ± 0.09                       | LC/MS neg |         |         |
| X-12458     | 0.79 ± 0.12  | 0.74 ± 0.08         | 1.01 ± 0.10*          | 1.06 ± 0.18  | 0.95 ± 0.09          | 1.32 ± 0.16*           | N/D                            | N/D                              | 0.89 ± 0.09                     | 1.36 ± 0.25                       | LC/MS pos |         |         |
| X-12459     | N/D          | N/D                 | N/D                   | N/D          | N/D                  | N/D                    | 1.33 ± 0.41                    | 1.10 ± 0.41                      | N/D                             | N/D                               | LC/MS pos |         |         |
| X-12465     | 3.20 ± 1.64  | 1.19 ± 0.17         | 1.98 ± 0.33*          | 1.35 ± 0.39  | 1.20 ± 0.16          | 2.19 ± 0.41*           | 1.41 ± 0.47                    | 1.68 ± 0.42                      | 1.47 ± 0.28                     | 1.78 ± 0.46                       | LC/MS pos |         |         |
| X-12510     | 1.35 ± 0.22* | 0.93 ± 0.08         | 0.89 ± 0.15           | 1.08 ± 0.19  | 0.80 ± 0.06          | 0.83 ± 0.16            | 0.91 ± 0.12                    | 1.26 ± 0.22                      | 1.17 ± 0.15                     | 1.63 ± 0.45                       | LC/MS pos |         |         |
| X-12537     | 3.11 ± 0.90  | 1.58 ± 0.24         | 1.04 ± 0.17           | N/D          | N/D                  | N/D                    | 1.09 ± 0.19                    | 1.04 ± 0.27                      | N/D                             | N/D                               | GC/MS     |         |         |
| X-12542     | 0.73 ± 0.09  | 0.89 ± 0.08         | 0.67 ± 0.07           | N/D          | N/D                  | N/D                    | N/D                            | N/D                              | N/D                             | N/D                               | LC/MS pos |         |         |
| X-12556     | 1.02 ± 0.08  | 1.03 ± 0.10         | 1.35 ± 0.16*          | N/D          | N/D                  | N/D                    | 1.02 ± 0.11                    | 1.11 ± 0.13                      | 1.06 ± 0.12                     | 1.23 ± 0.19                       | GC/MS     |         |         |
| X-12611     | 1.62 ± 0.53  | 1.76 ± 0.23         | 2.43 ± 0.49*          | 1.09 ± 0.30  | 1.43 ± 0.20          | 2.55 ± 0.38*           | N/D                            | N/D                              | N/D                             | N/D                               | LC/MS pos |         |         |
| X-12644     | 1.21 ± 0.19* | 0.64 ± 0.05         | 0.80 ± 0.11           | 1.50 ± 0.20* | 0.96 ± 0.10          | 0.59 ± 0.08            | 1.26 ± 0.14                    | 1.10 ± 0.15                      | 1.18 ± 0.11                     | 1.13 ± 0.18                       | LC/MS neg |         |         |
| X-12660     | 1.24 ± 0.18  | 1.17 ± 0.18         | 0.85 ± 0.15           | 1.50 ± 0.28  | 1.04 ± 0.13          | 0.94 ± 0.15            | N/D                            | N/D                              | 2.33 ± 0.50                     | 1.45 ± 0.38                       | LC/MS pos |         |         |
| X-12681     | N/D          | N/D                 | N/D                   | N/D          | N/D                  | N/D                    | 0.72 ± 0.10                    | 1.19 ± 0.28                      | 0.82 ± 0.07                     | 1.13 ± 0.24                       | LC/MS pos |         |         |
| X-12683     | N/D          | N/D                 | N/D                   | N/D          | N/D                  | N/D                    | 1.13 ± 0.29                    | 1.57 ± 0.56                      | N/D                             | N/D                               | LC/MS pos |         |         |
| X-12686     | N/D          | N/D                 | N/D                   | N/D          | N/D                  | N/D                    | 0.95 ± 0.09                    | 1.14 ± 0.24                      | 0.88 ± 0.11                     | 0.68 ± 0.10                       | LC/MS pos |         |         |
| X-12688     | 1.02 ± 0.25  | 1.54 ± 0.21         | 1.67 ± 0.30           | 0.94 ± 0.22  | 1.30 ± 0.19          | 1.66 ± 0.31*           | 1.36 ± 0.40                    | 1.92 ± 0.68                      | 1.35 ± 0.41                     | 1.05 ± 0.29                       | LC/MS pos |         |         |
| X-12690     | 0.79 ± 0.23  | 0.84 ± 0.10         | 1.10 ± 0.21*          | N/D          | N/D                  | N/D                    | 1.00 ± 0.13                    | 1.30 ± 0.24                      | 0.82 ± 0.10                     | 1.06 ± 0.17                       | LC/MS pos |         |         |
| X-12695     | 1.76 ± 0.70  | 2.35 ± 0.63         | 1.60 ± 0.36           | 1.68 ± 0.44  | 2.21 ± 0.59          | 1.97 ± 0.32*           | N/D                            | N/D                              | N/D                             | N/D                               | LC/MS neg |         |         |
| X-12707     | 1.04 ± 0.30  | 0.77 ± 0.11         | 1.06 ± 0.18*          | N/D          | N/D                  | N/D                    | N/D                            | N/D                              | 1.59 ± 0.50                     | 2.03 ± 0.57                       | LC/MS neg |         |         |
| X-12728     | N/D          | N/D                 | N/D                   | N/D          | N/D                  | N/D                    | N/D                            | N/D                              | 0.96 ± 0.09                     | 0.96 ± 0.10                       | LC/MS neg |         |         |
| X-12739     | N/D          | N/D                 | N/D                   | N/D          | N/D                  | N/D                    | 0.80 ± 0.12                    | 1.37 ± 0.56                      | N/D                             | N/D                               | LC/MS neg |         |         |
| X-12742     | 1.60 ± 0.52  | 2.73 ± 0.94         | 1.97 ± 0.73           | 1.24 ± 0.55  | 2.71 ± 0.72          | 2.41 ± 0.92            | 2.02 ± 0.51                    | 1.82 ± 0.61                      | 2.13 ± 0.60                     | 2.27 ± 1.03                       | LC/MS neg |         |         |
| X-12749     | 0.88 ± 0.23  | 0.90 ± 0.11         | 1.01 ± 0.16           | 0.89 ± 0.20  | 0.90 ± 0.14          | 1.12 ± 0.22            | 1.29 ± 0.22                    | 1.88 ± 0.31                      | 1.36 ± 0.22                     | 1.72 ± 0.35                       | LC/MS pos |         |         |
| X-12756     | N/D          | N/D                 | N/D                   | 0.33 ± 0.17* | 1.08 ± 0.15          | 0.61 ± 0.17            | N/D                            | N/D                              | 2.57 ± 0.80                     | 1.40 ± 0.46                       | LC/MS pos |         |         |
| X-12765     | N/D          | N/D                 | N/D                   | N/D          | N/D                  | N/D                    | 3.12 ± 1.09                    | 2.34 ± 0.87                      | 2.20 ± 0.94                     | 1.41 ± 0.47                       | LC/MS pos |         |         |
| X-12775     | 0.95 ± 0.24  | 1.06 ± 0.13         | 1.19 ± 0.22           | 0.72 ± 0.09  | 1.30 ± 0.21          | 1.27 ± 0.19            | 2.15 ± 1.08                    | 1.45 ± 0.38                      | 1.57 ± 0.31                     | 1.41 ± 0.38                       | LC/MS pos |         |         |
| X-12776     | 0.87 ± 0.13  | 1.06 ± 0.06         | 1.01 ± 0.09           | N/D          | N/D                  | N/D                    | 0.99 ± 0.03                    | 1.06 ± 0.04                      | 1.03 ± 0.02                     | 1.01 ± 0.03                       | LC/MS neg |         |         |
| X-12786     | 1.44 ± 0.22* | 0.89 ± 0.07         | 1.84 ± 0.40*          | 0.79 ± 0.12  | 0.76 ± 0.06          | 1.41 ± 0.24*           | 0.72 ± 0.10                    | 0.89 ± 0.21                      | 1.10 ± 0.18                     | 1.42 ± 0.21                       | GC/MS     |         |         |
| X-12792     | N/D          | N/D                 | N/D                   | 1.10 ± 0.07  | 1.10 ± 0.05          | 1.02 ± 0.13            | N/D                            | N/D                              | N/D                             | N/D                               | LC/MS pos |         |         |



| Biochemical | t0 SIRS+    | t0 Sepsis Survivors | t0 sepsis nonsurvivor | t24 SIRS+    | t24 Sepsis Survivors | t24 sepsis nonsurvivor | validation t0 Sepsis Survivors | Validation t0 sepsis nonsurvivor | Validation t24 Sepsis Survivors | Validation t24 sepsis nonsurvivor | PLATFORM  | KEGG ID          | HMDB ID   |
|-------------|-------------|---------------------|-----------------------|--------------|----------------------|------------------------|--------------------------------|----------------------------------|---------------------------------|-----------------------------------|-----------|------------------|-----------|
| X-12794     | 0.66 ± 0.21 | 1.08 ± 0.18         | 1.57 ± 0.53           | 0.54 ± 0.13* | 1.34 ± 0.22          | 1.54 ± 0.37            | N/D                            | N/D                              | 0.84 ± 0.22                     | 0.83 ± 0.24                       | LC/MS pos |                  |           |
| X-12802     | 1.04 ± 0.22 | 1.63 ± 0.23         | 3.10 ± 0.59*          | 0.92 ± 0.21  | 1.93 ± 0.37          | 3.97 ± 0.72*           | 1.21 ± 0.20                    | 2.66 ± 0.65                      | 1.27 ± 0.26                     | 2.13 ± 0.55                       | LC/MS pos |                  |           |
| X-12822     | N/D         | N/D                 | N/D                   | 0.99 ± 0.19  | 0.94 ± 0.09          | 1.44 ± 0.27*           | N/D                            | N/D                              | 1.24 ± 0.22                     | 1.46 ± 0.29                       | LC/MS neg |                  |           |
| X-12824     | N/D         | N/D                 | N/D                   | N/D          | N/D                  | N/D                    | 1.18 ± 0.20                    | 1.14 ± 0.27                      | 1.19 ± 0.26                     | 1.61 ± 0.55                       | LC/MS neg |                  |           |
| X-12844     | 1.58 ± 0.67 | 1.49 ± 0.20         | 1.04 ± 0.16           | 1.30 ± 0.38  | 1.64 ± 0.28          | 1.42 ± 0.23            | 1.47 ± 0.23                    | 1.13 ± 0.17                      | 1.76 ± 0.30                     | 1.61 ± 0.55                       | LC/MS neg |                  |           |
| X-12846     | N/D         | N/D                 | N/D                   | 0.85 ± 0.29  | 2.97 ± 1.23          | 2.16 ± 0.51            | 1.63 ± 0.38                    | 1.88 ± 0.76                      | 2.09 ± 0.58                     | 2.06 ± 0.80                       | LC/MS neg |                  |           |
| X-12847     | N/D         | N/D                 | N/D                   | N/D          | N/D                  | N/D                    | N/D                            | N/D                              | 1.20 ± 0.29                     | 0.72 ± 0.13                       | LC/MS neg |                  |           |
| X-12849     | 1.56 ± 0.55 | 1.94 ± 0.41         | 1.21 ± 0.23           | N/D          | N/D                  | N/D                    | N/D                            | N/D                              | N/D                             | N/D                               | LC/MS neg |                  |           |
| X-12850     | 2.36 ± 0.91 | 1.57 ± 0.35         | 4.55 ± 1.42           | 2.90 ± 1.05  | 1.76 ± 0.30          | 4.44 ± 1.21            | 3.47 ± 1.15                    | 5.51 ± 1.74                      | 2.16 ± 0.74                     | 3.17 ± 0.74                       | LC/MS neg |                  |           |
| X-12851     | N/D         | N/D                 | N/D                   | 0.96 ± 0.37  | 1.46 ± 0.48          | 3.22 ± 0.91*           | N/D                            | N/D                              | N/D                             | N/D                               | LC/MS neg |                  |           |
| X-12855     | 1.53 ± 0.40 | 0.92 ± 0.11         | 1.82 ± 0.26*          | 1.17 ± 0.20  | 0.99 ± 0.10          | 2.22 ± 0.33*           | 0.74 ± 0.08                    | 1.20 ± 0.28                      | 0.96 ± 0.12                     | 1.40 ± 0.29                       | LC/MS pos |                  |           |
| X-12860     | 1.11 ± 0.26 | 0.79 ± 0.09         | 1.20 ± 0.16*          | 1.01 ± 0.22  | 1.01 ± 0.12          | 1.64 ± 0.26*           | 0.60 ± 0.11                    | 1.28 ± 0.27                      | 0.99 ± 0.13                     | 1.75 ± 0.51                       | LC/MS pos |                  |           |
| X-12990     | 1.27 ± 0.16 | 1.02 ± 0.07         | 1.21 ± 0.13           | 1.50 ± 0.24  | 0.97 ± 0.07          | 1.10 ± 0.19            | 0.78 ± 0.11                    | 0.83 ± 0.21                      | 0.97 ± 0.07                     | 0.92 ± 0.15                       | LC/MS neg |                  |           |
| X-13152     | N/D         | N/D                 | N/D                   | N/D          | N/D                  | N/D                    | 0.94 ± 0.14                    | 1.89 ± 0.65                      | 0.91 ± 0.10                     | 1.55 ± 0.42                       | LC/MS pos |                  |           |
| X-13429     | 0.76 ± 0.27 | 1.54 ± 0.32         | 0.77 ± 0.21           | 0.80 ± 0.22  | 2.00 ± 0.36          | 1.85 ± 0.81            | 4.69 ± 2.26                    | 3.32 ± 1.50                      | 1.86 ± 0.71                     | 1.53 ± 0.44                       | LC/MS neg |                  |           |
| X-13435     | 1.54 ± 0.19 | 1.18 ± 0.11         | 1.99 ± 0.28*          | N/D          | N/D                  | N/D                    | N/D                            | N/D                              | 0.99 ± 0.11                     | 1.91 ± 0.36*                      | LC/MS pos |                  |           |
| X-13465     | N/D         | N/D                 | N/D                   | 1.28 ± 0.33  | 2.06 ± 0.41          | 3.17 ± 0.74*           | N/D                            | N/D                              | N/D                             | N/D                               | LC/MS neg |                  |           |
| X-13543     | N/D         | N/D                 | N/D                   | N/D          | N/D                  | N/D                    | 1.20 ± 0.26                    | 0.56 ± 0.05                      | N/D                             | N/D                               | LC/MS pos |                  |           |
| X-13553     | 1.64 ± 0.39 | 1.25 ± 0.20         | 2.88 ± 0.50*          | 1.22 ± 0.23  | 1.62 ± 0.36          | 4.35 ± 0.86*           | 1.25 ± 0.30                    | 1.78 ± 0.36                      | 2.09 ± 0.56                     | 4.01 ± 1.04                       | LC/MS neg |                  |           |
| X-13619     | 0.99 ± 0.08 | 1.06 ± 0.05         | 0.91 ± 0.07           | 1.07 ± 0.08  | 0.96 ± 0.04          | 0.81 ± 0.06            | 0.96 ± 0.09                    | 0.98 ± 0.13                      | 1.03 ± 0.05                     | 0.92 ± 0.09                       | GC/MS     |                  |           |
| X-13684     | N/D         | N/D                 | N/D                   | N/D          | N/D                  | N/D                    | N/D                            | N/D                              | 0.87 ± 0.11                     | 0.89 ± 0.15                       | LC/MS pos |                  |           |
| X-13687     | N/D         | N/D                 | N/D                   | N/D          | N/D                  | N/D                    | 1.09 ± 0.28                    | 1.25 ± 0.53                      | 1.55 ± 0.34                     | 1.67 ± 0.62                       | LC/MS pos |                  |           |
| X-13727     | N/D         | N/D                 | N/D                   | 1.57 ± 0.67  | 2.44 ± 0.87          | 5.23 ± 2.31            | N/D                            | N/D                              | 1.98 ± 0.60                     | 1.17 ± 0.26                       | LC/MS neg |                  |           |
| X-13751     | 1.03 ± 0.04 | 0.98 ± 0.02         | 0.97 ± 0.04           | 0.97 ± 0.04  | 0.97 ± 0.02          | 1.03 ± 0.04            | N/D                            | N/D                              | N/D                             | N/D                               | LC/MS pos |                  |           |
| X-13852     | N/D         | N/D                 | N/D                   | N/D          | N/D                  | N/D                    | 2.69 ± 0.61                    | 3.37 ± 1.09                      | 1.58 ± 0.31                     | 2.23 ± 0.68                       | LC/MS pos |                  |           |
| X-13871     | N/D         | N/D                 | N/D                   | N/D          | N/D                  | N/D                    | 1.02 ± 0.13                    | 1.28 ± 0.27                      | 1.08 ± 0.15                     | 1.28 ± 0.36                       | LC/MS pos |                  |           |
| X-14056     | N/D         | N/D                 | N/D                   | N/D          | N/D                  | N/D                    | 1.06 ± 0.09                    | 1.32 ± 0.28                      | 0.96 ± 0.13                     | 1.17 ± 0.20                       | LC/MS pos |                  |           |
| X-14091     | N/D         | N/D                 | N/D                   | N/D          | N/D                  | N/D                    | 1.22 ± 0.17                    | 1.60 ± 0.32                      | N/D                             | N/D                               | LC/MS neg |                  |           |
| X-14318     | N/D         | N/D                 | N/D                   | N/D          | N/D                  | N/D                    | 0.87 ± 0.20                    | 0.89 ± 0.28                      | N/D                             | N/D                               | LC/MS pos |                  |           |
| X-14473     | N/D         | N/D                 | N/D                   | N/D          | N/D                  | N/D                    | 1.18 ± 0.24                    | 1.22 ± 0.34                      | 1.02 ± 0.14                     | 1.11 ± 0.29                       | LC/MS pos |                  |           |
| X-14561     | N/D         | N/D                 | N/D                   | N/D          | N/D                  | N/D                    | 2.19 ± 0.57                    | 0.83 ± 0.08                      | N/D                             | N/D                               | LC/MS neg |                  |           |
| X-14584     | N/D         | N/D                 | N/D                   | N/D          | N/D                  | N/D                    | 0.86 ± 0.16                    | 1.37 ± 0.24                      | 0.90 ± 0.16                     | 0.81 ± 0.17                       | LC/MS neg |                  |           |
| X-14588     | 0.94 ± 0.04 | 0.98 ± 0.02         | 1.16 ± 0.06*          | 0.91 ± 0.04  | 0.98 ± 0.03          | 1.14 ± 0.03*           | 1.01 ± 0.04                    | 1.04 ± 0.05                      | 1.01 ± 0.03                     | 1.06 ± 0.05                       | LC/MS neg |                  |           |
| X-14625     | N/D         | N/D                 | N/D                   | 1.33 ± 0.15  | 1.13 ± 0.08          | 1.00 ± 0.11            | N/D                            | N/D                              | 1.09 ± 0.07                     | 1.14 ± 0.11                       | LC/MS neg |                  |           |
| X-14626     | 0.84 ± 0.42 | 1.41 ± 0.32         | 0.46 ± 0.15*          | 0.54 ± 0.11* | 2.23 ± 0.49          | 1.36 ± 0.49            | 4.74 ± 2.21                    | 4.29 ± 2.62                      | 2.29 ± 0.93                     | 3.15 ± 1.56                       | LC/MS neg |                  |           |
| X-14632     | N/D         | N/D                 | N/D                   | N/D          | N/D                  | N/D                    | N/D                            | N/D                              | 0.98 ± 0.23                     | 1.16 ± 0.29                       | LC/MS neg |                  |           |
| X-14658     | 2.36 ± 0.88 | 2.34 ± 0.62         | 9.79 ± 3.94           | 4.29 ± 2.91  | 2.35 ± 0.59          | 11.58 ± 3.51*          | 3.17 ± 1.40                    | 10.16 ± 4.78                     | 2.06 ± 0.62                     | 6.48 ± 2.07                       | LC/MS neg |                  |           |
| X-14662     | 1.29 ± 0.30 | 5.33 ± 3.94         | 2.79 ± 0.72           | 2.28 ± 0.99  | 11.40 ± 10.12        | 3.36 ± 1.39            | 1.78 ± 0.73                    | 6.92 ± 2.29*                     | 1.13 ± 0.29                     | 4.43 ± 1.50*                      | LC/MS neg |                  |           |
| X-14663     | 1.21 ± 0.67 | 2.30 ± 1.21         | 2.67 ± 0.95           | 1.84 ± 0.78  | 12.00 ± 10.78        | 3.65 ± 1.46            | 1.15 ± 0.36                    | 5.73 ± 2.21*                     | 1.46 ± 0.55                     | 7.65 ± 2.84*                      | LC/MS neg |                  |           |
| X-14837     | N/D         | N/D                 | N/D                   | N/D          | N/D                  | N/D                    | 1.33 ± 0.68                    | 1.00 ± 0.25                      | 3.01 ± 2.30                     | 1.43 ± 0.51                       | LC/MS pos |                  |           |
| X-14842     | N/D         | N/D                 | N/D                   | N/D          | N/D                  | N/D                    | 0.98 ± 0.05                    | 0.91 ± 0.15                      | N/D                             | N/D                               | GC/MS     |                  |           |
| xanthine    | 1.40 ± 0.18 | 1.04 ± 0.06         | 1.35 ± 0.17           | 0.90 ± 0.10  | 0.87 ± 0.05          | 0.90 ± 0.12            | 1.10 ± 0.24                    | 0.86 ± 0.08                      | 1.24 ± 0.26                     | 0.88 ± 0.12                       | LC/MS pos | C00385<br>C00502 | HMDB00292 |
| xylonate    | 2.04 ± 0.54 | 2.48 ± 0.49         | 2.47 ± 0.57           | 1.63 ± 0.46  | 1.70 ± 0.39          | 1.99 ± 0.36*           | N/D                            | N/D                              | 1.79 ± 0.41                     | 1.79 ± 0.53                       | GC/MS     | C05411           |           |
| xylose      | 2.13 ± 0.68 | 1.28 ± 0.20         | 1.53 ± 0.37           | 1.14 ± 0.27  | 0.98 ± 0.14          | 0.96 ± 0.15            | N/D                            | N/D                              | 1.32 ± 0.25                     | 1.23 ± 0.31                       | GC/MS     | C00181           | HMDB00098 |

**Table S4. Normalized factor scores of Bayesian factor analysis for normal renal function (eGFR $\geq$ 75 ml/min). Sepsis outcomes [SIRS+, uncomplicated sepsis (UCS), sepsis survivor (SS), septic shock (SS) and sepsis nonsurvivor(SNS)], etiologic agents and clinical parameters were fit to a normal distribution with mean of 0 and standard deviation of 1. Normal renal function (eGFR  $\geq$ 75 mL/min) at t0 (n = 44) and t24 (n = 36). Individual metabolite factor score  $\geq$  0.1 or  $\leq$  -0.1 was considered significant (designated by \*).**

| Biochemical Name         | Time Point | SIRS    | UCS      | SS       | Sshock   | SNS      | <i>S. aureus</i> | <i>S. pneumoniae</i> | <i>E. coli</i> | Gender  | Race    | Liver Disease | Hepatitis | Alcohol Abuse | Neoplastic Disease |
|--------------------------|------------|---------|----------|----------|----------|----------|------------------|----------------------|----------------|---------|---------|---------------|-----------|---------------|--------------------|
| glycine                  | t0         | -0.0055 | -0.0135  | -0.0139  | 0.0221   | 0.2755*  | 0.0375           | 0.0217               | -0.0483        | -0.0279 | -0.0109 | 0.023         | 0.0753    | 0.0096        | 0.0419             |
|                          | t24        | 0.0625  | -0.0255  | 0.01     | 0.0141   | -0.0162  | 0.0361           | 0.0363               | -0.0259        | 0.0214  | 0.0831  | 0.0184        | 0.0257    | 0.0405        | 0.0196             |
| N-acetylglycine          | t0         | -0.0914 | -0.0359  | -0.0138  | 0.0267   | 0.1554*  | 0.1209*          | -0.0015              | -0.0208        | -0.0089 | -0.0366 | -0.0359       | 0.0415    | 0.0207        | 0.2169*            |
|                          | t24        | -0.005  | -0.0196  | 0.1300*  | -0.014   | 0.0155   | -0.0115          | 0.0392               | 0.0156         | -0.0081 | 0.0114  | -0.0135       | -0.0672   | -0.0381       | -0.0072            |
| serine                   | t0         | -0.0215 | -0.0581  | 0.0336   | 0.1025*  | -0.0459  | 0.033            | 0.0053               | 0.0547         | 0.0029  | -0.0113 | -0.0411       | -0.0263   | 0.02          | -0.0236            |
|                          | t24        | -0.0157 | 0.1720*  | 0.0444   | -0.0539  | -0.0625  | 0.0298           | -0.036               | 0.0889         | -0.0033 | 0.0357  | 0.0092        | 0.0369    | -0.0094       | -0.0547            |
| threonine                | t0         | 0.0015  | -0.0128  | -0.0154  | 0.018    | 0.003    | 0.0163           | -0.0002              | -0.0549        | -0.0107 | 0.1553* | 0.008         | -0.0165   | -0.0106       | -0.0105            |
|                          | t24        | 0.0026  | 0.0086   | 0.0256   | -0.0356  | -0.0128  | 0.0339           | 0.0047               | -0.0515        | 0.0528  | 0.1069* | 0.067         | -0.0356   | 0.0247        | 0.0104             |
| N-acetylthreonine        | t0         | -0.0579 | -0.0612  | 0.0002   | 0.0447   | 0.0052   | 0.0222           | 0.0213               | -0.0092        | -0.0096 | -0.0189 | -0.0059       | 0.0528    | -0.0072       | 0.0107             |
|                          | t24        | -0.0183 | -0.066   | -0.1100* | 0.1073*  | 0.1158*  | 0.1671*          | 0.0071               | -0.0169        | -0.0115 | -0.0303 | -0.0582       | 0.2608*   | 0.018         | -0.0024            |
| betaine                  | t0         | 0.03    | -0.0187  | -0.0032  | 0.0057   | 0.0088   | -0.0108          | 0.0746               | 0.0121         | 0.024   | 0.0265  | 0.6048*       | 0.0052    | 0.0571        | 0.0002             |
|                          | t24        | 0.0189  | -0.0144  | -0.024   | 0.0236   | -0.0178  | -0.0213          | 0.0919               | 0.024          | 0.0266  | -0.0276 | 0.2915*       | -0.0052   | 0.1682*       | 0.0143             |
| alanine                  | t0         | 0.046   | 0.0547   | -0.0076  | -0.1501* | -0.0432  | -0.0184          | 0.0408               | -0.0385        | -0.0149 | 0.0114  | -0.0032       | 0.0404    | 0.0038        | -0.0066            |
|                          | t24        | 0.0979  | -0.0218  | 0.0245   | 0.0155   | -0.0418  | -0.0046          | -0.0053              | -0.0052        | -0.0314 | 0.0616  | 0.0034        | 0.0089    | 0.0191        | 0.0019             |
| aspartate                | t0         | 0.024   | -0.0185  | 0.0274   | 0.0259   | -0.1624* | 0.0153           | -0.0215              | -0.0764        | 0.0191  | 0.0017  | -0.1022*      | 0.0015    | 0.0403        | -0.0321            |
|                          | t24        | -0.0414 | 0.022    | -0.0213  | -0.0431  | 0.0565   | 0.1263*          | -0.0186              | 0.0198         | -0.0608 | -0.0072 | -0.018        | 0.1444*   | -0.0218       | 0.1296*            |
| N-acetylaspartate (NAA)  | t0         | 0.0972  | -0.0296  | -0.001   | 0.0081   | -0.0183  | -0.0693          | 0.0108               | -0.0413        | -0.0021 | 0.0024  | 0.0107        | -0.044    | -0.0197       | 0.0282             |
|                          | t24        | N/D     | N/D      | N/D      | N/D      | N/D      | N/D              | N/D                  | N/D            | N/D     | N/D     | N/D           | N/D       | N/D           | N/D                |
| asparagine               | t0         | 0.0111  | 0.0129   | -0.0017  | -0.0143  | 0.0068   | 0.0911           | 0.1178*              | -0.0879        | 0.0016  | 0.1044* | 0.0195        | 0.0378    | -0.0143       | -0.0076            |
|                          | t24        | 0.029   | -0.0364  | 0.0582   | -0.009   | -0.024   | 0.0005           | 0.0511               | -0.0592        | -0.0312 | 0.4097* | 0.0565        | 0.0151    | 0.0201        | -0.0002            |
| glutamate                | t0         | 0.1275* | -0.0615  | 0.0229   | 0.0308   | -0.0739  | -0.015           | -0.061               | 0.0179         | 0.0121  | -0.052  | -0.0218       | 0.0549    | 0.0581        | -0.036             |
|                          | t24        | 0.0058  | 0.0384   | -0.0328  | -0.0805  | 0.0257   | -0.0025          | -0.0142              | 0.0602         | -0.0063 | -0.0806 | -0.0055       | 0.4997*   | 0.0037        | 0.03               |
| glutamine                | t0         | 0.0086  | -0.0425  | -0.023   | 0.0072   | 0.0984   | 0.0051           | 0.0633               | -0.0601        | 0.0146  | 0.1284* | 0.0033        | 0.0571    | 0.0411        | 0.0057             |
|                          | t24        | 0.031   | -0.0051  | 0.0056   | 0.0041   | -0.0325  | -0.004           | -0.0045              | -0.0106        | 0.0082  | 0.1453* | -0.0472       | 0.0096    | -0.0032       | 0.0227             |
| pyroglutamine            | t0         | 0.024   | -0.0164  | 0.0371   | -0.1762* | 0.0246   | 0.0739           | -0.1230*             | -0.013         | -0.0202 | 0.0301  | 0.0464        | 0.0156    | 0.0899        | -0.0536            |
|                          | t24        | 0.0288  | -0.0312  | -0.0117  | -0.1969* | 0.2580*  | 0.0636           | -0.0951              | -0.0199        | -0.036  | -0.0099 | -0.0052       | 0.0969    | 0.0198        | 0.0034             |
| histidine                | t0         | 0.0031  | -0.0057  | 0.0019   | -0.0121  | 0.0125   | 0.0157           | 0.0745               | -0.095         | -0.0013 | 0.1236* | 0.0084        | -0.0109   | 0.0534        | -0.0243            |
|                          | t24        | 0.0165  | 0.0168   | 0.0392   | -0.0782  | -0.0197  | 0.0903           | 0.0115               | -0.0158        | 0.0036  | 0.0092  | 0.2520*       | -0.0042   | -0.0026       | 0.001              |
| 3-methylhistidine        | t0         | 0.0002  | 0.005    | 0.0316   | 0.0088   | -0.0423  | -0.0215          | 0.1655*              | -0.0041        | -0.0572 | -0.0574 | -0.0225       | 0.0667    | 0.0741        | 0.0627             |
|                          | t24        | 0.061   | 0.1106*  | -0.0552  | 0.0179   | -0.1036* | 0.0137           | 0.0367               | -0.0084        | -0.0228 | -0.0546 | -0.0141       | -0.0079   | 0.2661*       | 0.0073             |
| 1-methylimidazoleacetate | t0         | -0.0471 | -0.0335  | 0.0031   | 0.0652   | 0.1323*  | 0.0039           | -0.033               | -0.0192        | 0.0252  | 0.0649  | 0.0158        | -0.0272   | 0.0552        | 0.0335             |
|                          | t24        | -0.0692 | -0.0522  | 0.0195   | 0.0149   | 0.2650*  | 0.062            | -0.0458              | -0.0281        | 0.0037  | 0.0055  | -0.0003       | 0.0525    | 0.0243        | 0.0898             |
| lysine                   | t0         | 0.0089  | -0.1041* | 0.015    | 0.0844   | -0.0125  | 0.0076           | 0.0017               | 0.1790*        | 0.001   | -0.0192 | -0.061        | -0.0144   | -0.0137       | -0.0206            |
|                          | t24        | -0.0082 | 0.019    | 0.012    | -0.0504  | 0.0279   | 0.0474           | -0.0307              | 0.1234*        | -0.0195 | -0.0398 | -0.0062       | 0.4563*   | -0.0792       | 0.0389             |
| pipecolate               | t0         | 0.0588  | -0.0532  | -0.0542  | 0.1372*  | 0.0049   | -0.0337          | 0.0459               | -0.0115        | 0.0301  | 0       | 0.0484        | -0.0108   | 0.0128        | -0.004             |
|                          | t24        | -0.0087 | -0.0826  | 0.0045   | 0.0795   | -0.0243  | 0.0331           | 0.0345               | -0.0134        | 0.2712* | -0.0196 | 0.0439        | 0.0316    | 0.0418        | 0.0044             |
| phenyllactate (PLA)      | t0         | N/D     | N/D      | N/D      | N/D      | N/D      | N/D              | N/D                  | N/D            | N/D     | N/D     | N/D           | N/D       | N/D           | N/D                |
|                          | t24        | -0.0416 | -0.0421  | 0.0365   | -0.017   | 0.1443*  | 0.1066*          | 0.0299               | -0.015         | -0.0026 | 0.0122  | 0.0104        | 0.4686*   | 0.0234        | 0.0094             |
| phenylalanine            | t0         | -0.0369 | 0.0438   | 0.0177   | 0.0008   | -0.015   | 0.1385*          | 0.0161               | -0.0061        | -0.0006 | 0.1544* | 0.0254        | 0.0332    | -0.0227       | -0.095             |
|                          | t24        | -0.0453 | 0.0214   | 0.0391   | -0.0591  | 0.007    | 0.4220*          | -0.0461              | -0.0101        | -0.0973 | 0.0671  | 0.0368        | 0.0661    | 0.0427        | 0.0062             |
| phenylacetate            | t0         | 0.0542  | -0.007   | -0.0036  | 0.0297   | -0.0581  | -0.0061          | -0.0076              | 0.002          | 0.0483  | -0.0395 | -0.1070*      | 0.1197*   | 0.0134        | 0.024              |
|                          | t24        | N/D     | N/D      | N/D      | N/D      | N/D      | N/D              | N/D                  | N/D            | N/D     | N/D     | N/D           | N/D       | N/D           | N/D                |
| p-cresol sulfate         | t0         | -0.0021 | -0.0468  | -0.0667  | 0.0586   | 0.0101   | -0.0216          | 0.0343               | 0.0133         | -0.0033 | -0.0245 | -0.3146*      | -0.0218   | -0.1117*      | -0.0253            |
|                          | t24        | 0.0201  | -0.0252  | -0.0787  | 0.0104   | 0.0415   | 0.0032           | 0.0316               | 0.0083         | -0.0122 | -0.0816 | -0.0998       | -0.0034   | -0.0604       | -0.0126            |

| Biochemical Name            | Time Point | SIRS    | UCS      | SS      | Sshock   | SNS      | <i>S. aureus</i> | <i>S. pneumoniae</i> | <i>E. coli</i> | Gender   | Race    | Liver Disease | Hepatitis | Alcohol Abuse | Neoplastic Disease |
|-----------------------------|------------|---------|----------|---------|----------|----------|------------------|----------------------|----------------|----------|---------|---------------|-----------|---------------|--------------------|
| tyrosine                    | t0         | 0.037   | 0.015    | 0.1139* | -0.0399  | -0.0541  | 0.1201*          | 0.0317               | -0.0213        | -0.0509  | 0.1622* | -0.038        | 0.0046    | 0.0379        | 0.0109             |
|                             | t24        | 0.0054  | 0.0026   | 0.1367* | -0.0153  | -0.0436  | 0.2696*          | -0.0395              | -0.0148        | -0.0006  | 0.0695  | 0.0182        | 0.0083    | 0.0265        | 0.009              |
| HPLA                        | t0         | -0.01   | -0.0231  | 0.0294  | -0.0144  | 0.0224   | 0.073            | 0.0009               | -0.0042        | -0.0304  | 0.1887* | -0.0339       | 0.0238    | 0.1235*       | -0.1003*           |
|                             | t24        | -0.0325 | -0.0197  | 0.0246  | -0.0261  | 0.1636*  | 0.1041*          | 0.015                | -0.0356        | -0.0335  | 0.0217  | -0.0193       | 0.2990*   | 0.0336        | 0.0293             |
| 3-methoxytyrosine           | t0         | -0.0402 | -0.0633  | 0.0065  | 0.0542   | 0.054    | -0.0129          | 0.1697*              | -0.0269        | -0.0159  | -0.0188 | -0.0214       | 0.0184    | 0.0269        | 0.0362             |
|                             | t24        | -0.0383 | -0.0538  | 0.0028  | 0.0682   | 0.0276   | -0.0022          | 0.1709*              | -0.0491        | -0.0089  | -0.0313 | -0.0426       | 0.0183    | 0.0761        | 0.0982             |
| phenylacetylglutamine       | t0         | -0.0238 | -0.1116* | -0.0671 | 0.1892*  | 0.0703   | -0.0325          | 0.0353               | 0.0256         | 0.002    | -0.0925 | -0.1415*      | -0.0199   | 0.0014        | -0.0139            |
|                             | t24        | 0.0067  | -0.1070* | -0.0782 | 0.0233   | 0.072    | -0.0047          | 0.0206               | 0.0279         | -0.0175  | -0.0217 | -0.2134*      | -0.0092   | -0.0797       | -0.0379            |
| phenol sulfate              | t0         | 0.4843* | -0.0322  | 0.0086  | -0.001   | 0.0011   | -0.0232          | 0.0087               | 0.0183         | 0.1112*  | -0.0071 | -0.0012       | 0.0044    | 0.0152        | -0.0111            |
|                             | t24        | -0.0062 | -0.0178  | -0.0091 | 0.0302   | 0.0179   | -0.0176          | 0.0308               | 0.0356         | 0.0105   | -0.0488 | -0.1301*      | 0.0135    | 0.0107        | -0.0353            |
| kynurenate                  | t0         | -0.0263 | 0.0071   | -0.0058 | -0.0072  | 0.0418   | -0.0241          | -0.0083              | -0.0404        | -0.0712  | -0.0035 | 0.0278        | -0.0187   | -0.0177       | -0.0206            |
|                             | t24        | N/D     | N/D      | N/D     | N/D      | N/D      | N/D              | N/D                  | N/D            | N/D      | N/D     | N/D           | N/D       | N/D           | N/D                |
| kynurenine                  | t0         | -0.0059 | -0.0317  | 0.0009  | 0.1154*  | -0.0063  | -0.0095          | 0.0042               | -0.1369*       | 0.0175   | 0.0403  | 0.0367        | 0.0323    | 0.0095        | -0.1047*           |
|                             | t24        | -0.0546 | -0.0032  | -0.0228 | 0.0161   | 0.2052*  | 0.009            | -0.0221              | -0.1290*       | -0.0605  | -0.0125 | 0.008         | 0.0372    | 0.034         | 0.0005             |
| tryptophan                  | t0         | 0.0234  | 0.1319*  | 0.0154  | -0.0658  | -0.1109* | 0.0532           | -0.0303              | -0.0297        | 0.0017   | 0.0153  | -0.037        | -0.0023   | 0.021         | 0.0279             |
|                             | t24        | 0.0078  | 0.0537   | 0.0759  | -0.058   | -0.059   | 0.1239*          | -0.1111*             | -0.0374        | 0.0028   | 0.0584  | 0.0066        | 0.0241    | 0.1242*       | 0.025              |
| indolelactate               | t0         | -0.0303 | -0.0045  | 0.0105  | 0.0754   | -0.0214  | 0.1129*          | -0.1294*             | 0.0263         | -0.0508  | 0.0415  | -0.0599       | -0.0031   | 0.1100*       | -0.0825            |
|                             | t24        | -0.0303 | -0.011   | 0.0218  | -0.1006* | 0.0918   | 0.1172*          | 0.0009               | -0.0724        | -0.0844  | 0.1439* | -0.0728       | 0.057     | 0.0932        | -0.0192            |
| indoleacetate               | t0         | N/D     | N/D      | N/D     | N/D      | N/D      | N/D              | N/D                  | N/D            | N/D      | N/D     | N/D           | N/D       | N/D           | N/D                |
|                             | t24        | 0.0229  | 0.0621   | 0.0297  | -0.0064  | -0.0957  | 0.0086           | -0.0013              | 0.0079         | -0.2167* | -0.0096 | -0.025        | 0.1197*   | -0.0318       | 0.2705*            |
| 3-indoxyl sulfate           | t0         | 0.0069  | -0.0378  | -0.0183 | 0.1709*  | 0.0138   | -0.0499          | 0.0073               | 0.0117         | 0.0997   | -0.0012 | -0.1953*      | -0.0013   | -0.0159       | -0.0356            |
|                             | t24        | -0.0084 | -0.0404  | -0.029  | 0.0383   | 0.0349   | -0.0017          | 0.0294               | 0.1026*        | 0.1506*  | -0.0208 | -0.3792*      | 0.0291    | 0.0938        | -0.0273            |
| indolepropionate            | t0         | N/D     | N/D      | N/D     | N/D      | N/D      | N/D              | N/D                  | N/D            | N/D      | N/D     | N/D           | N/D       | N/D           | N/D                |
|                             | t24        | -0.0192 | 0.0881   | -0.0141 | 0.0094   | -0.0355  | -0.0126          | 0.08                 | -0.0096        | 0.0589   | -0.0236 | -0.0151       | -0.0097   | -0.02         | 0.0031             |
| C-glycosyltryptophan        | t0         | -0.0371 | -0.1206* | -0.0289 | 0.1321*  | 0.1465*  | -0.0267          | -0.0025              | 0.0033         | 0.0722   | -0.0089 | 0.0354        | 0.0024    | -0.014        | 0.0117             |
|                             | t24        | -0.0196 | -0.0144  | -0.017  | 0.0765   | 0.5210*  | 0.0216           | 0.0052               | 0.0033         | 0.0205   | -0.0015 | -0.0151       | 0.0243    | -0.025        | -0.0045            |
| 3-methyl-2-oxobutyrate      | t0         | 0.0212  | 0.0158   | 0.0123  | -0.1843* | 0.0103   | 0.0559           | -0.0438              | -0.0458        | 0.0108   | 0.0761  | 0.0096        | -0.0533   | 0.1119*       | -0.0132            |
|                             | t24        | 0.0282  | 0.0086   | 0.1583* | -0.2081* | -0.0298  | -0.0018          | -0.0007              | -0.0031        | 0.0165   | 0.0504  | 0.1230*       | -0.0127   | 0.0343        | 0.007              |
| 3-methyl-2-oxovalerate      | t0         | 0.0626  | 0.0584   | -0.0109 | -0.0537  | -0.0105  | 0.0757           | -0.0992              | 0.0132         | 0.0292   | 0.0075  | -0.1119*      | 0.0242    | 0.0359        | 0.0063             |
|                             | t24        | 0.2496* | 0.0748   | 0.0032  | -0.0321  | -0.0867  | 0.0015           | -0.0076              | 0.0223         | -0.0014  | -0.0002 | -0.2942*      | 0.0136    | 0.0048        | -0.2904*           |
| beta-hydroxyisovalerate     | t0         | -0.0069 | -0.0144  | -0.0401 | -0.0023  | 0.0987   | 0.1120*          | -0.0306              | -0.0397        | 0.0094   | 0.0605  | -0.0407       | -0.0166   | 0.0094        | -0.0177            |
|                             | t24        | -0.0053 | -0.0565  | 0.0175  | -0.0231  | 0.2366*  | 0.4040*          | -0.0143              | -0.0496        | -0.0166  | 0.1559* | -0.0303       | -0.0132   | 0.0286        | 0.0077             |
| isoleucine                  | t0         | 0.0297  | 0.0032   | -0.0155 | -0.014   | 0.0108   | 0.1213*          | -0.0586              | -0.0092        | 0.0109   | 0.0165  | -0.0815       | 0.0184    | -0.0067       | -0.0116            |
|                             | t24        | -0.009  | 0.0117   | 0.0208  | -0.0231  | -0.011   | 0.0525           | -0.0377              | -0.007         | -0.0463  | 0.0283  | -0.4138*      | -0.0163   | -0.0555       | -0.1403*           |
| leucine                     | t0         | -0.0521 | 0.0081   | -0.0075 | -0.0085  | 0.0195   | 0.2508*          | -0.0332              | -0.0086        | -0.0026  | 0.0867  | -0.0635       | -0.0013   | 0.0232        | -0.0114            |
|                             | t24        | -0.0334 | 0.0522   | 0.1684* | -0.1146* | 0.002    | 0.1549*          | -0.2017*             | -0.0439        | -0.0165  | 0.0361  | -0.0176       | -0.0434   | -0.0183       | 0.0028             |
| N-acetylaniline             | t0         | -0.0458 | -0.0674  | -0.0053 | 0.0358   | 0.0975   | 0.0238           | 0.046                | 0.0114         | 0.0133   | 0.0298  | -0.0072       | 0.1535*   | 0.004         | -0.0177            |
|                             | t24        | -0.0727 | -0.1689* | -0.0182 | 0.0343   | 0.3492*  | 0.0178           | 0.0175               | -0.0037        | -0.0092  | 0.0053  | -0.0353       | 0.2737*   | -0.016        | 0.0029             |
| valine                      | t0         | 0.0522  | -0.0016  | -0.0001 | -0.0692  | -0.0056  | 0.1255*          | -0.1104*             | -0.0612        | 0.036    | 0.0685  | -0.1594*      | -0.0283   | 0.0216        | 0.0046             |
|                             | t24        | -0.0295 | 0.0687   | 0.1593* | -0.1225* | -0.0427  | 0.1218*          | -0.1354*             | -0.0505        | -0.0058  | 0.0451  | 0.0041        | -0.034    | 0.0016        | -0.001             |
| 4-methyl-2-oxopentanoate    | t0         | 0.0496  | 0.0977   | -0.0143 | -0.082   | -0.027   | 0.0224           | -0.0933              | -0.0049        | 0.0419   | 0.0234  | -0.0305       | -0.0123   | 0.1285*       | -0.0042            |
|                             | t24        | 0.0193  | 0.0395   | 0.0189  | -0.2048* | -0.0567  | 0.009            | -0.0733              | 0.0225         | -0.0033  | -0.0148 | -0.0329       | 0.0144    | 0.0528        | 0.0138             |
| 3-hydroxy-2-ethylpropionate | t0         | 0.0008  | -0.0852  | -0.0016 | 0.0273   | 0.0096   | 0.0088           | -0.0276              | 0.0244         | 0.0233   | 0.0208  | -0.072        | 0.006     | -0.0238       | -0.0679            |
|                             | t24        | -0.0211 | 0.0005   | -0.0171 | 0.0274   | 0.041    | 0.0055           | 0.0181               | 0.1648*        | 0.0152   | -0.0585 | -0.0211       | -0.0266   | -0.0183       | 0.0063             |
| alpha-hydroxyisovalerate    | t0         | 0.0398  | 0.0096   | 0.0091  | -0.0667  | -0.0004  | 0.0519           | -0.0075              | 0.0097         | 0.0408   | 0.0026  | 0.1396*       | 0.0097    | 0.2929*       | -0.0624            |
|                             | t24        | 0.0192  | -0.0149  | -0.0239 | -0.0563  | 0.0688   | -0.0115          | 0.0704               | -0.0294        | 0.1038*  | -0.0577 | 0.4590*       | 0.0277    | 0.0405        | -0.0129            |
| propionylcarnitine (C3)     | t0         | -0.0194 | -0.0565  | 0.0172  | 0.0094   | 0.0613   | 0.0368           | -0.0216              | -0.0083        | -0.0231  | 0.0124  | -0.0214       | 0.0086    | -0.0132       | -0.0308            |
|                             | t24        | -0.0243 | -0.0178  | 0.0046  | -0.0273  | 0.1986*  | 0.0793           | -0.0638              | -0.0133        | -0.0239  | 0.0009  | -0.0501       | 0.0034    | 0.0088        | -0.0338            |
| butyrylcarnitine (C4)       | t0         | -0.0015 | -0.0288  | 0.0073  | -0.0034  | 0.3119*  | -0.0119          | -0.0116              | 0.0004         | -0.0287  | 0.1517* | -0.0262       | -0.0341   | -0.0192       | -0.0422            |
|                             | t24        | -0.0119 | -0.0441  | 0.0038  | -0.0124  | 0.2391*  | -0.0163          | -0.0242              | 0.0163         | -0.0183  | 0.2164* | -0.0612       | 0.0122    | -0.0189       | -0.0322            |

| Biochemical Name                | Time Point | SIRS     | UCS      | SS      | Sshock   | SNS     | <i>S. aureus</i> | <i>S. pneumoniae</i> | <i>E. coli</i> | Gender   | Race    | Liver Disease | Hepatitis | Alcohol Abuse | Neoplastic Disease |
|---------------------------------|------------|----------|----------|---------|----------|---------|------------------|----------------------|----------------|----------|---------|---------------|-----------|---------------|--------------------|
| isobutyrylcarnitine (C4)        | t0         | -0.0274  | -0.0151  | -0.0105 | 0.0015   | 0.1363* | 0.004            | -0.0048              | -0.023         | -0.0323  | -0.0112 | -0.0106       | -0.0174   | -0.0137       | -0.0301            |
|                                 | t24        | -0.023   | -0.0083  | 0.0013  | -0.0282  | 0.1444* | 0.0168           | -0.0374              | -0.0114        | -0.0351  | -0.0036 | -0.0121       | -0.0125   | -0.0214       | -0.0186            |
| 2-methylbutyrylcarnitine (C5)   | t0         | -0.0246  | -0.0111  | 0.0052  | 0.0037   | 0.1136* | 0.0348           | -0.0065              | -0.0096        | -0.0295  | 0.0023  | -0.0219       | -0.0117   | -0.0016       | -0.033             |
|                                 | t24        | -0.0163  | 0.0088   | -0.0033 | -0.0263  | 0.4024* | 0.0447           | -0.0175              | -0.0005        | -0.0762  | 0.003   | -0.0865       | 0.0139    | -0.0018       | -0.059             |
| isovalerylcarnitine (C5)        | t0         | -0.004   | 0.0509   | 0.0393  | -0.1004* | -0.0078 | 0.069            | 0.0295               | -0.0202        | -0.0672  | 0.0493  | -0.0388       | 0.0037    | 0.0369        | -0.0672            |
|                                 | t24        | -0.1070* | 0.1046*  | 0.0708  | -0.3397* | -0.0046 | 0.1201*          | -0.0086              | -0.0075        | -0.0534  | 0.1134* | -0.0088       | 0.0357    | -0.0003       | -0.0641            |
| hydroxyisovalerylcarnitine (C5) | t0         | 0.006    | -0.0012  | 0.0016  | 0.0027   | 0.0139  | 0.1033*          | -0.0258              | -0.0007        | -0.0507  | 0.0048  | -0.0338       | -0.0396   | 0.0532        | -0.0513            |
|                                 | t24        | -0.0259  | -0.0379  | 0.005   | 0.0001   | 0.1636* | 0.1838*          | -0.0589              | 0.0507         | -0.1689* | 0.0137  | -0.0207       | -0.0106   | 0.001         | -0.0422            |
| tiglyl carnitine (C5)           | t0         | -0.0062  | -0.0158  | 0.0009  | -0.0308  | 0.0717  | 0.0201           | -0.0405              | 0.0104         | -0.0121  | 0.0053  | -0.0352       | -0.0035   | -0.0198       | -0.0597            |
|                                 | t24        | -0.0393  | -0.0009  | -0.0309 | -0.025   | 0.2420* | 0.0783           | -0.035               | -0.0219        | -0.0793  | -0.017  | -0.0349       | 0.0011    | -0.0337       | -0.0036            |
| cysteine                        | t0         | 0.0117   | -0.0296  | -0.0051 | 0.0987   | -0.0137 | 0.0013           | -0.0069              | 0.052          | -0.0075  | -0.0564 | -0.0914       | -0.0296   | 0.0092        | -0.0339            |
|                                 | t24        | -0.0328  | 0.0431   | -0.015  | -0.0465  | 0.0541  | 0.0095           | -0.0615              | 0.2442*        | -0.089   | -0.0029 | -0.0891       | 0.1565*   | -0.0127       | 0.0114             |
| cystine                         | t0         | -0.0053  | -0.0254  | -0.0043 | 0.1381*  | -0.0063 | 0.0483           | 0.0311               | 0.0238         | 0.0153   | -0.0202 | -0.0481       | -0.0591   | 0.0067        | -0.0197            |
|                                 | t24        | N/D      | N/D      | N/D     | N/D      | N/D     | N/D              | N/D                  | N/D            | N/D      | N/D     | N/D           | N/D       | N/D           | N/D                |
| methionine                      | t0         | -0.0076  | 0.0138   | 0.1221* | -0.0083  | -0.022  | 0.1468*          | 0.0159               | 0.0326         | -0.0146  | 0.0851  | -0.0519       | 0.0612    | 0.0138        | -0.0139            |
|                                 | t24        | 0.0337   | 0.0051   | 0.0706  | -0.0142  | -0.0974 | 0.0579           | -0.0075              | 0.0126         | -0.052   | 0.1077* | -0.0283       | 0.1290*   | 0.0332        | -0.0358            |
| alpha-ketobutyrate              | t0         | -0.001   | 0.0142   | 0.0125  | -0.0781  | 0.0084  | 0.0621           | -0.03                | -0.0195        | -0.012   | 0.1044* | -0.0086       | -0.0198   | 0.0175        | -0.0008            |
|                                 | t24        | -0.0042  | -0.0071  | 0.0206  | -0.0372  | 0.0979  | 0.0156           | -0.0853              | -0.0387        | -0.1853* | 0.0555  | -0.0096       | -0.1074*  | -0.1009*      | 0.0139             |
| 2-hydroxybutyrate (AHB)         | t0         | 0.0008   | -0.0275  | 0.0117  | -0.0133  | 0.0218  | 0.0598           | -0.0536              | -0.006         | -0.0279  | 0.0906  | 0.008         | -0.0396   | 0.0145        | -0.0344            |
|                                 | t24        | -0.0305  | 0.0028   | 0.0158  | -0.0333  | 0.1371* | -0.0081          | 0.004                | -0.003         | -0.0818  | 0.1122* | -0.0248       | -0.0238   | -0.0637       | -0.0125            |
| SDMA                            | t0         | -0.0196  | -0.1113* | 0.0014  | 0.0308   | 0.0735  | 0.0144           | 0.0632               | -0.0333        | 0.0711   | 0.0308  | -0.0112       | 0.1102*   | 0.0335        | -0.0319            |
|                                 | t24        | -0.0397  | -0.1715* | 0.0114  | 0.0386   | 0.2037* | 0.1429*          | 0.0212               | -0.0176        | 0.0135   | 0.0277  | -0.0275       | 0.2644*   | -0.0553       | 0.0353             |
| arginine                        | t0         | -0.007   | -0.0254  | 0.0007  | -0.022   | 0.2693* | -0.0029          | 0.0974               | 0.0028         | 0.1255*  | 0.0107  | -0.0129       | -0.0148   | 0.0028        | 0.0115             |
|                                 | t24        | 0.0194   | 0.0243   | 0.0782  | -0.0596  | -0.0269 | 0.1256*          | -0.0042              | -0.021         | -0.033   | -0.0132 | -0.013        | -0.0094   | 0.0131        | -0.0182            |
| ornithine                       | t0         | -0.0013  | -0.0568  | 0.0314  | 0.0713   | -0.0209 | 0.0122           | 0.021                | 0.0052         | 0.031    | -0.0013 | -0.0703       | -0.0098   | 0.0143        | -0.0213            |
|                                 | t24        | -0.0244  | 0.1255*  | 0.0048  | -0.0567  | 0.0055  | 0.0163           | -0.0264              | 0.1759*        | -0.0177  | -0.0023 | -0.0118       | 0.2609*   | -0.0244       | 0.0065             |
| urea                            | t0         | -0.0844  | -0.0902  | 0.0723  | 0.0729   | 0.0021  | -0.0092          | 0.1466*              | 0.0174         | -0.0521  | -0.0178 | -0.0049       | 0.0204    | -0.0178       | -0.0076            |
|                                 | t24        | -0.0294  | -0.0477  | 0.0306  | 0.0073   | 0.3006* | 0.034            | 0.0039               | 0.001          | -0.0756  | 0.0177  | -0.0683       | 0.0546    | -0.0219       | -0.0018            |
| proline                         | t0         | 0.0268   | -0.0085  | -0.0041 | -0.008   | -0.0015 | -0.0012          | 0.0173               | 0.0381         | 0.0731   | 0.2688* | 0.0167        | 0.0126    | 0.0072        | -0.0148            |
|                                 | t24        | 0.0034   | -0.0129  | 0.0376  | -0.011   | 0.0039  | 0.0694           | -0.0042              | 0.0038         | 0.1270*  | 0.0417  | 0.0128        | 0.0344    | 0.0177        | 0.012              |
| citrulline                      | t0         | 0.0357   | -0.0145  | 0.0168  | -0.0128  | 0.0043  | 0.0022           | -0.0003              | -0.0267        | 0.0442   | -0.0071 | -0.0646       | 0.0374    | 0.3584*       | 0.0105             |
|                                 | t24        | -0.0035  | -0.0108  | 0.0509  | -0.0172  | 0.0028  | 0.0144           | 0.018                | -0.031         | 0.0107   | 0.0163  | -0.002        | 0.0348    | 0.5673*       | -0.0166            |
| N-acetylorithine                | t0         | -0.0306  | -0.0157  | 0.0122  | 0.024    | -0.002  | 0.1679*          | 0.019                | -0.011         | 0.055    | 0.1434* | -0.0427       | 0.1343*   | -0.0291       | -0.0139            |
|                                 | t24        | -0.0249  | -0.0103  | 0.0059  | 0.0306   | -0.009  | 0.0859           | 0.0259               | -0.0114        | 0.0768   | 0.0532  | -0.0712       | 0.1303*   | 0.0019        | -0.0294            |
| hydroxyproline                  | t0         | 0.1038*  | -0.0368  | -0.0561 | -0.0088  | 0.0297  | 0.0175           | 0.022                | -0.0186        | 0.0618   | -0.0267 | 0.1181*       | 0.0364    | 0.0145        | -0.0086            |
|                                 | t24        | -0.0241  | 0.0154   | -0.0034 | 0.0095   | -0.0005 | 0.0315           | 0.0498               | -0.0039        | 0.08     | 0.0155  | 0.0174        | 0.0044    | -0.0076       | -0.0111            |
| homocitrulline                  | t0         | -0.0585  | -0.0815  | 0.0199  | 0.0018   | 0.0448  | -0.007           | -0.0037              | -0.0222        | -0.0242  | -0.0287 | -0.0246       | -0.0217   | -0.0468       | 0.0153             |
|                                 | t24        | N/D      | N/D      | N/D     | N/D      | N/D     | N/D              | N/D                  | N/D            | N/D      | N/D     | N/D           | N/D       | N/D           | N/D                |
| stachydrine                     | t0         | 0.0027   | -0.0378  | 0.0244  | 0.0511   | -0.019  | 0.0026           | 0.0894               | -0.0099        | -0.0337  | -0.0278 | 0.0245        | 0.1510*   | 0.0627        | -0.0022            |
|                                 | t24        | 0.0069   | 0.0228   | -0.0515 | 0.0104   | -0.0244 | 0.0197           | 0.0463               | 0.0158         | -0.1198* | -0.085  | -0.0152       | 0.1344*   | 0.1664*       | 0.0293             |
| homostachydrine                 | t0         | N/D      | N/D      | N/D     | N/D      | N/D     | N/D              | N/D                  | N/D            | N/D      | N/D     | N/D           | N/D       | N/D           | N/D                |
|                                 | t24        | -0.0082  | 0.0506   | 0.0129  | -0.0448  | 0.0012  | 0.0357           | 0.0089               | 0.3348*        | -0.0266  | -0.0157 | 0.0343        | 0.2978*   | 0.1035*       | -0.0281            |
| creatine                        | t0         | -0.1286* | -0.0109  | -0.0063 | 0.0318   | 0.0039  | 0.0431           | 0.0008               | -0.021         | 0.0142   | 0.0118  | -0.0726       | -0.0078   | -0.1107*      | -0.0025            |
|                                 | t24        | -0.0612  | -0.0457  | -0.0218 | 0.1052*  | 0.065   | 0.0072           | 0.0016               | 0.0112         | 0.0071   | -0.0173 | -0.1461*      | -0.0962   | -0.1421*      | -0.0291            |
| creatinine                      | t0         | -0.0208  | 0.0565   | 0.0315  | -0.1199* | -0.0246 | 0.0256           | 0.0186               | -0.0195        | 0.0025   | -0.0175 | -0.0335       | 0.0215    | 0.2403*       | -0.0879            |
|                                 | t24        | -0.0351  | -0.0025  | 0.0221  | -0.0761  | 0.2597* | -0.0005          | 0.0007               | -0.0472        | -0.0997  | 0.0313  | -0.3526*      | 0.0317    | -0.0015       | -0.0145            |
| 2-aminobutyrate                 | t0         | 0.0067   | 0.0063   | -0.004  | -0.0098  | 0.0181  | 0.1507*          | -0.0284              | -0.022         | 0.0024   | 0.1838* | -0.0077       | -0.0072   | 0.006         | -0.0045            |
|                                 | t24        | 0.004    | -0.0165  | 0.0236  | -0.0382  | 0.0185  | 0.0613           | -0.0906              | -0.0248        | -0.0312  | 0.3805* | -0.0619       | -0.0086   | 0.0078        | 0.0387             |
| 5-methylthioadenosine (MTA)     | t0         | N/D      | N/D      | N/D     | N/D      | N/D     | N/D              | N/D                  | N/D            | N/D      | N/D     | N/D           | N/D       | N/D           | N/D                |
|                                 | t24        | -0.0289  | -0.0822  | 0.0083  | 0.014    | 0.3232* | 0.0468           | 0.0045               | 0.0041         | -0.0171  | 0.0159  | 0.0061        | 0.4083*   | 0.018         | 0.0112             |

| Biochemical Name              | Time Point | SIRS     | UCS      | SS      | Sshock   | SNS      | <i>S. aureus</i> | <i>S. pneumoniae</i> | <i>E. coli</i> | Gender   | Race     | Liver Disease | Hepatitis | Alcohol Abuse | Neoplastic Disease |
|-------------------------------|------------|----------|----------|---------|----------|----------|------------------|----------------------|----------------|----------|----------|---------------|-----------|---------------|--------------------|
| 4-acetamidobutanoate          | t0         | -0.0467  | -0.0489  | -0.0211 | 0.4372*  | 0.0757   | 0.0248           | 0.0633               | -0.0043        | 0.0463   | 0.0195   | 0.0215        | 0.005     | 0.0098        | -0.005             |
|                               | t24        | -0.0281  | -0.1549* | -0.0753 | 0.0514   | 0.1648*  | 0.0538           | 0.0054               | -0.0233        | 0.0186   | 0.028    | -0.0419       | 0.2532*   | -0.0561       | 0.0732             |
| 5-oxoproline                  | t0         | -0.013   | 0.0007   | -0.0106 | -0.0028  | 0.0204   | 0.0015           | -0.0303              | -0.0253        | 0.0113   | 0.1446*  | -0.0111       | 0.1882*   | 0.0002        | -0.0453            |
|                               | t24        | 0.0901   | -0.0074  | -0.0083 | -0.0297  | 0.0315   | 0.0078           | -0.0548              | -0.0116        | 0.0208   | -0.0147  | -0.0044       | 0.4259*   | 0.0198        | -0.0448            |
| prolylhydroxyproline          | t0         | -0.047   | -0.0801  | -0.0298 | 0.2070*  | 0.1771*  | -0.0087          | -0.0306              | -0.0129        | 0.0128   | -0.0048  | 0.0113        | -0.0132   | -0.0718       | 0.0001             |
|                               | t24        | 0.0026   | -0.023   | -0.0542 | 0.0083   | 0.0584   | -0.0152          | 0.0387               | -0.0046        | 0.0285   | -0.0042  | -0.0074       | 0.0045    | -0.0425       | -0.0201            |
| glutamylvaline                | t0         | -0.0302  | -0.0128  | 0.0216  | -0.0145  | 0.1509*  | 0.0321           | -0.0327              | -0.0342        | 0.1766*  | 0.1262*  | 0.0338        | 0.1276*   | 0.0103        | -0.0392            |
|                               | t24        | -0.1109* | 0.0782   | 0.0032  | -0.1057* | 0.0819   | 0.1126*          | -0.0273              | -0.0672        | 0.0375   | 0.0093   | -0.0029       | 0.0271    | 0.0355        | 0.1071*            |
| gamma-glutamylleucine         | t0         | -0.0271  | 0.0988   | -0.0037 | -0.0373  | 0.0201   | 0.1533*          | -0.0295              | -0.0381        | 0.0152   | 0.0739   | -0.0366       | 0.0155    | 0.0257        | -0.0242            |
|                               | t24        | -0.0612  | 0.2893*  | 0.09    | -0.089   | 0.0132   | 0.0598           | -0.0513              | -0.0492        | -0.0154  | 0.1315*  | -0.0163       | -0.0059   | 0.0189        | -0.0097            |
| gamma-glutamylisoleucine      | t0         | N/D      | N/D      | N/D     | N/D      | N/D      | N/D              | N/D                  | N/D            | N/D      | N/D      | N/D           | N/D       | N/D           | N/D                |
|                               | t24        | -0.0055  | 0.0166   | -0.0044 | 0.0029   | -0.0285  | -0.0024          | 0.0024               | -0.0539        | 0.0717   | -0.0253  | -0.0482       | 0.0018    | -0.0087       | -0.0271            |
| gamma-glutamylglutamine       | t0         | 0.019    | 0.0141   | -0.0241 | -0.0981  | 0.0516   | -0.033           | 0.0406               | -0.0081        | 0.0214   | 0.2190*  | -0.0124       | 0.0581    | 0.0341        | -0.0061            |
|                               | t24        | -0.0051  | -0.0091  | -0.0161 | 0.0168   | 0.0023   | 0.0012           | 0.026                | -0.0397        | 0.0582   | 0.1728*  | -0.1235*      | 0.0219    | 0.0155        | -0.0017            |
| gamma-glutamylphenylalanine   | t0         | -0.0701  | 0.0778   | 0.0128  | -0.0092  | 0.0231   | 0.002            | 0.0177               | -0.0544        | -0.0053  | 0.0456   | 0.2806*       | 0.0909    | -0.0098       | -0.0813            |
|                               | t24        | -0.1085* | 0.0496   | 0.0072  | -0.1225* | 0.0215   | 0.0824           | -0.0331              | 0.0189         | -0.0796  | 0.0248   | 0.0286        | 0.3297*   | 0.0089        | 0.0604             |
| gamma-glutamyltyrosine        | t0         | -0.0448  | 0.0253   | 0.1196* | -0.0242  | -0.0076  | 0.038            | -0.0162              | -0.0131        | -0.0721  | 0.1994*  | 0.0018        | -0.0059   | 0.0928        | 0.0029             |
|                               | t24        | 0.0021   | -0.001   | 0.043   | -0.0387  | 0.0066   | 0.1853*          | -0.0211              | -0.0506        | 0.0189   | 0.1004*  | 0.0194        | 0.014     | 0.0042        | 0.0443             |
| N-acetylglucosamine 6-sulfate | t0         | N/D      | N/D      | N/D     | N/D      | N/D      | N/D              | N/D                  | N/D            | N/D      | N/D      | N/D           | N/D       | N/D           | N/D                |
|                               | t24        | -0.0224  | -0.0289  | -0.0436 | 0.0819   | 0.4440*  | -0.0071          | 0.0144               | 0.0191         | 0.0154   | -0.0289  | -0.0104       | 0.0357    | -0.0144       | 0.0021             |
| erythronate                   | t0         | -0.0516  | -0.1693* | -0.003  | 0.1811*  | 0.0589   | -0.0286          | 0.0989               | 0.0353         | 0.0334   | -0.0219  | 0.0603        | 0.0847    | 0.0097        | -0.0394            |
|                               | t24        | -0.0248  | -0.0323  | -0.0289 | 0.0667   | 0.4221*  | 0.0804           | 0.0006               | 0.011          | -0.0129  | -0.0069  | -0.0252       | 0.1291*   | -0.0154       | 0.026              |
| N-acetylneuraminate           | t0         | 0.0006   | -0.0167  | -0.0349 | 0.0367   | 0.1097*  | -0.1991*         | -0.0133              | 0              | -0.0402  | -0.1812* | 0.0036        | -0.0149   | -0.0688       | 0.0009             |
|                               | t24        | -0.0296  | -0.0365  | -0.0262 | 0.0359   | 0.1557*  | -0.0621          | 0.0126               | -0.0219        | 0.0212   | 0.0026   | -0.0302       | 0.0039    | -0.0241       | -0.0475            |
| erythrose                     | t0         | 0.0256   | 0.1280*  | 0.0234  | -0.0295  | -0.1923* | -0.022           | -0.0059              | 0.0072         | 0.0307   | 0.001    | -0.0009       | 0.0533    | 0.02          | -0.0167            |
|                               | t24        | -0.0268  | 0.0364   | 0.0092  | -0.0122  | -0.018   | -0.0061          | 0.0566               | -0.0056        | 0.0159   | 0.0359   | 0.0012        | -0.0958   | 0.0834        | -0.0147            |
| fructose                      | t0         | 0.0029   | 0.0555   | -0.023  | 0.0105   | -0.0508  | -0.0834          | 0.0106               | -0.0633        | 0.0838   | 0.0321   | -0.0123       | 0.0763    | -0.0053       | 0.0176             |
|                               | t24        | -0.0037  | 0.2505*  | -0.0436 | 0.0359   | -0.0368  | -0.037           | 0.0478               | 0.0166         | 0.0181   | 0.0276   | 0.0189        | -0.0329   | 0.0809        | -0.0237            |
| maltose                       | t0         | -0.0005  | -0.0317  | 0.2028* | -0.0106  | -0.0052  | -0.0448          | 0.0651               | 0.0011         | -0.0134  | -0.0453  | -0.0109       | -0.0262   | -0.03         | -0.0347            |
|                               | t24        | N/D      | N/D      | N/D     | N/D      | N/D      | N/D              | N/D                  | N/D            | N/D      | N/D      | N/D           | N/D       | N/D           | N/D                |
| mannitol                      | t0         | -0.0089  | -0.0329  | -0.0022 | 0.1493*  | -0.0075  | -0.0017          | 0.0722               | 0.012          | 0.048    | -0.0159  | -0.0021       | -0.0328   | 0.1047*       | -0.0092            |
|                               | t24        | -0.0447  | -0.0188  | -0.0258 | 0.1091*  | 0.0506   | 0.009            | -0.0573              | -0.0111        | -0.0228  | 0.0119   | 0.093         | 0.0303    | 0.0143        | 0.2240*            |
| mannose                       | t0         | 0.035    | -0.0528  | 0.0156  | 0.002    | -0.0201  | -0.0115          | 0.0037               | -0.0184        | -0.1028* | -0.0313  | -0.0648       | -0.1052*  | -0.0328       | 0.067              |
|                               | t24        | 0.0062   | 0.0007   | 0.005   | -0.0007  | -0.0044  | -0.0361          | -0.0393              | -0.005         | -0.2664* | 0.0315   | -0.1557*      | -0.1156*  | -0.0539       | 0.021              |
| sucrose                       | t0         | -0.0196  | -0.0195  | -0.0126 | 0.023    | 0.0679   | -0.034           | 0.0524               | 0.035          | 0.037    | -0.0005  | -0.0214       | -0.047    | -0.0171       | -0.008             |
|                               | t24        | -0.0127  | -0.0245  | -0.0436 | 0.0354   | 0.1143*  | 0.0109           | 0.0013               | -0.0311        | 0.0197   | -0.0596  | 0.0186        | -0.0246   | -0.0248       | -0.0586            |
| 1,5-anhydroglucitol (1,5-AG)  | t0         | -0.0046  | 0.2677*  | 0.0056  | -0.0265  | 0.0007   | 0.0807           | -0.0118              | -0.0245        | 0.0143   | 0.0152   | -0.0223       | 0.001     | 0.0386        | -0.0104            |
|                               | t24        | -0.0014  | 0.1944*  | 0.0112  | -0.0198  | -0.03    | 0.0924           | -0.003               | -0.0101        | 0.015    | -0.0227  | -0.0575       | 0.1065*   | 0.1049*       | -0.0213            |
| glycerate                     | t0         | 0.1033*  | -0.0361  | -0.0186 | 0.0052   | -0.0106  | -0.1259*         | -0.0036              | -0.1551*       | -0.0078  | -0.04    | 0.3109*       | 0.0548    | 0.0072        | 0.0305             |
|                               | t24        | 0.0079   | 0.0154   | -0.0106 | -0.005   | -0.0076  | -0.1730*         | 0.0127               | -0.0016        | -0.0113  | 0.0117   | 0.4794*       | 0.0132    | 0.0746        | -0.0168            |
| glucose                       | t0         | 0.4118*  | -0.0351  | 0.034   | -0.0059  | -0.0165  | -0.0434          | 0.0713               | -0.0035        | -0.0212  | -0.0213  | -0.0115       | -0.0238   | 0.0329        | 0.0319             |
|                               | t24        | 0.0263   | -0.0171  | 0.0072  | -0.0037  | -0.0082  | 0.0163           | -0.043               | -0.0322        | -0.0611  | 0.0116   | -0.0639       | -0.088    | 0.0152        | 0.0089             |
| 1,6-anhydroglucose            | t0         | 0.0902   | -0.0018  | -0.0168 | 0.0205   | -0.0453  | -0.0488          | 0.0296               | -0.036         | 0.0249   | 0.0065   | -0.0206       | 0.0473    | 0.0326        | -0.0796            |
|                               | t24        | N/D      | N/D      | N/D     | N/D      | N/D      | N/D              | N/D                  | N/D            | N/D      | N/D      | N/D           | N/D       | N/D           | N/D                |
| dihydroxyacetone              | t0         | 0.0797   | -0.0016  | 0.049   | -0.0149  | -0.2393* | -0.0473          | 0.0636               | -0.0251        | 0.0179   | -0.0248  | 0.0077        | 0.0011    | 0.0146        | -0.0573            |
|                               | t24        | -0.0305  | 0.0347   | 0.0258  | 0.0036   | -0.0484  | 0.0077           | 0.1584*              | -0.0075        | 0.0011   | 0.0557   | 0.0095        | -0.0088   | 0.0362        | -0.0115            |
| pyruvate                      | t0         | -0.0209  | 0.1763*  | -0.0122 | -0.0055  | -0.0072  | -0.0312          | 0.0252               | -0.0002        | 0.0215   | 0.0297   | 0.0251        | 0.0063    | 0.0031        | -0.0188            |
|                               | t24        | 0.0259   | -0.0008  | -0.0215 | -0.0036  | 0.0011   | 0.0279           | -0.0536              | -0.0297        | 0.0004   | -0.0286  | 0.0023        | -0.0349   | -0.0348       | -0.0029            |
| lactate                       | t0         | -0.0136  | 0.0044   | -0.0106 | 0.0344   | -0.0155  | -0.0246          | 0.0396               | 0.1193*        | -0.0041  | -0.0003  | 0.004         | -0.0184   | 0.0081        | -0.0292            |
|                               | t24        | -0.01    | 0.0068   | -0.0164 | -0.015   | 0.0389   | -0.001           | 0.0376               | 0.1102*        | 0.0053   | -0.016   | 0.0966        | 0.0332    | 0.0062        | -0.0008            |

| Biochemical Name                 | Time Point | SIRS     | UCS      | SS       | Sshock   | SNS     | <i>S. aureus</i> | <i>S. pneumoniae</i> | <i>E. coli</i> | Gender   | Race    | Liver Disease | Hepatitis | Alcohol Abuse | Neoplastic Disease |
|----------------------------------|------------|----------|----------|----------|----------|---------|------------------|----------------------|----------------|----------|---------|---------------|-----------|---------------|--------------------|
| glucuronate                      | t0         | -0.0031  | 0.0052   | -0.0053  | -0.0174  | 0.2103* | -0.0456          | 0.0119               | -0.0168        | 0.0081   | -0.0499 | 0.2786*       | 0.0058    | 0.0007        | -0.0223            |
|                                  | t24        | N/D      | N/D      | N/D      | N/D      | N/D     | N/D              | N/D                  | N/D            | N/D      | N/D     | N/D           | N/D       | N/D           | N/D                |
| arabitol                         | t0         | -0.0009  | -0.1906* | -0.0282  | 0.0489   | 0.0546  | -0.0538          | 0.1929*              | 0.029          | 0.006    | -0.0486 | 0.1385*       | 0.0108    | 0.003         | -0.0511            |
|                                  | t24        | -0.0153  | -0.0959  | -0.0043  | 0.033    | 0.2884* | 0.0552           | 0.0192               | -0.0529        | -0.0022  | -0.004  | -0.0339       | 0.0563    | 0.0108        | -0.0002            |
| threitol                         | t0         | 0.0167   | -0.0956  | 0.0041   | 0.1744*  | -0.0121 | -0.0652          | 0.0176               | -0.0165        | 0.0284   | -0.0543 | 0.0191        | 0.0603    | -0.0174       | 0.0169             |
|                                  | t24        | -0.0449  | -0.0508  | -0.0174  | 0.0407   | 0.1016* | 0.062            | -0.012               | -0.0092        | -0.0075  | -0.0208 | -0.0419       | 0.0428    | -0.011        | 0.1031*            |
| gluconate                        | t0         | 0.0072   | -0.0023  | -0.0133  | 0.037    | -0.0201 | -0.0632          | 0.0162               | -0.0638        | 0.0055   | -0.0461 | 0.1183*       | -0.0124   | -0.0067       | 0.0284             |
|                                  | t24        | -0.0431  | -0.0111  | -0.0228  | 0.0215   | 0.0748  | 0.0891           | -0.0256              | -0.0112        | -0.0307  | -0.0338 | 0.0337        | 0.1232*   | -0.0093       | 0.2285*            |
| arabinose                        | t0         | 0.0032   | 0.0009   | -0.0444  | 0.0746   | -0.0298 | -0.0617          | 0.1688*              | 0              | 0.1199*  | -0.0012 | 0.0195        | -0.0086   | 0.0327        | 0.0252             |
|                                  | t24        | -0.0042  | -0.0213  | -0.0369  | 0.0087   | 0.1042* | 0.0118           | 0.0063               | 0.012          | -0.0061  | -0.0405 | -0.0029       | 0.3918*   | -0.0012       | 0.1571*            |
| xylose                           | t0         | 0.0095   | -0.0116  | -0.0367  | 0.0655   | -0.0438 | -0.0438          | -0.0286              | -0.0402        | 0.0278   | 0.0657  | -0.0132       | 0.0546    | -0.0275       | 0.0146             |
|                                  | t24        | -0.0089  | -0.0401  | -0.0122  | 0.0373   | 0.0032  | 0.1096*          | -0.0494              | 0.2978*        | 0.0002   | 0.0895  | 0.0696        | 0.0021    | -0.0121       | 0.0233             |
| xylonate                         | t0         | -0.0337  | -0.039   | 0.0043   | 0.0451   | 0.0189  | -0.1664*         | 0.1555*              | -0.0782        | 0.0283   | -0.0103 | 0.2440*       | 0.034     | -0.011        | -0.0202            |
|                                  | t24        | -0.0796  | -0.0008  | -0.0178  | 0.034    | 0.3005* | 0.017            | 0.0374               | -0.0012        | 0.0071   | 0.0184  | 0.0061        | 0.1027*   | 0.0042        | 0.0218             |
| citrate                          | t0         | 0.1864*  | -0.0014  | -0.0147  | -0.0132  | 0.0014  | -0.0216          | 0.3519*              | 0.0097         | 0.0245   | -0.0111 | 0.1396*       | 0.0133    | 0.0072        | -0.0059            |
|                                  | t24        | -0.0103  | 0.0862   | -0.0096  | -0.0017  | -0.0223 | -0.0055          | 0.0893               | -0.0058        | 0.0451   | 0.0016  | 0.0024        | -0.0023   | -0.0233       | -0.0056            |
| alpha-ketoglutarate              | t0         | 0.0887   | 0.01     | 0.0251   | -0.0228  | -0.0307 | -0.0254          | 0.0918               | -0.0081        | 0.015    | -0.0283 | 0.1964*       | 0.0547    | 0.1382*       | -0.037             |
|                                  | t24        | -0.0043  | 0.0117   | -0.0119  | -0.0075  | -0.0064 | -0.014           | 0.0835               | 0.0158         | 0.0029   | -0.0506 | 0.0091        | 0.1041*   | 0.3728*       | -0.0069            |
| malate                           | t0         | 0.1146*  | -0.0172  | 0.0045   | 0.0064   | -0.0394 | -0.0434          | 0.0592               | 0.0355         | 0.0162   | 0.0011  | 0.0143        | 0.1590*   | 0.1171*       | -0.0502            |
|                                  | t24        | -0.0224  | -0.011   | -0.0113  | 0.0086   | 0.0208  | 0.0187           | 0.0419               | 0.0449         | -0.0515  | -0.016  | 0.005         | 0.2631*   | 0.2365*       | -0.0077            |
| oxaloacetate                     | t0         | -0.0096  | 0.0358   | -0.0169  | 0.0218   | -0.0268 | -0.0333          | 0.0439               | 0.0281         | 0.0325   | 0.026   | 0.0105        | 0.0062    | 0.007         | -0.0116            |
|                                  | t24        | -0.0217  | 0.0389   | -0.0309  | 0.0086   | 0.0035  | -0.0191          | 0.055                | 0.0676         | 0.039    | -0.0155 | 0.1052*       | -0.0617   | 0.034         | -0.0307            |
| phosphate                        | t0         | 0.0422   | -0.0834  | -0.0378  | 0.0251   | 0.0042  | -0.0833          | -0.0132              | -0.0182        | -0.0058  | -0.0489 | -0.1045*      | -0.0685   | 0.0187        | -0.0081            |
|                                  | t24        | 0.0256   | -0.055   | -0.0208  | -0.0092  | 0.028   | -0.0049          | 0.0005               | 0.0255         | -0.0578  | -0.0188 | -0.0766       | 0.05      | 0.009         | 0.0082             |
| linolenate (18:3n3 or 3n6)       | t0         | 0.0131   | -0.0121  | 0.0182   | -0.0101  | -0.0038 | -0.0322          | 0.0048               | -0.0029        | -0.0701  | 0.0027  | 0.0836        | -0.0069   | 0.0039        | -0.0221            |
|                                  | t24        | -0.0072  | -0.0225  | 0.0486   | 0.032    | -0.0468 | -0.0366          | 0.0048               | -0.0243        | -0.0484  | 0.1806* | -0.0488       | -0.0307   | -0.0164       | -0.0082            |
| dihomolinolenate (20:3n3 or 3n6) | t0         | 0.0231   | -0.0204  | -0.0078  | -0.0209  | 0.0134  | -0.0288          | -0.0394              | -0.0396        | -0.0217  | 0.0022  | 0.0496        | -0.0125   | 0.006         | 0.0075             |
|                                  | t24        | 0.0309   | -0.0331  | 0.0335   | 0.0578   | -0.0347 | -0.0266          | -0.0059              | -0.0219        | -0.0305  | 0.1789* | -0.0262       | -0.0296   | -0.0508       | -0.0051            |
| eicosapentaenoate (EPA; 20:5n3)  | t0         | 0.1052*  | -0.0361  | -0.003   | -0.0008  | -0.0283 | -0.0232          | -0.0239              | -0.001         | -0.0344  | 0.0087  | 0.031         | -0.01     | -0.032        | 0.2083*            |
|                                  | t24        | 0.0088   | -0.0174  | 0.0072   | 0.0813   | -0.0541 | -0.0334          | -0.0297              | -0.0038        | -0.0434  | 0.1788* | -0.0293       | -0.0449   | -0.0413       | 0.0074             |
| docosapentaenoate (DPA; 22:5n3)  | t0         | 0.0761   | -0.0228  | -0.0162  | -0.0302  | 0.0118  | -0.0782          | -0.0044              | 0.0357         | -0.029   | 0.0051  | 0.3780*       | -0.0038   | 0.0011        | 0.0804             |
|                                  | t24        | 0.0164   | -0.0748  | 0.0335   | 0.0519   | -0.0253 | -0.1180*         | 0.0068               | 0.0558         | -0.0469  | 0.1521* | -0.017        | -0.0205   | -0.0704       | 0.0039             |
| docosahexaenoate (DHA; 22:6n3)   | t0         | 0.0539   | -0.0107  | -0.0195  | -0.0465  | 0.0176  | -0.0663          | 0.0012               | 0.0158         | -0.0089  | -0.0155 | 0.1130*       | 0.0002    | -0.0038       | 0.0704             |
|                                  | t24        | 0.0221   | -0.1288* | 0.1332*  | 0.0143   | -0.0119 | -0.0689          | 0.0452               | 0.0214         | -0.0265  | 0.022   | -0.0378       | 0.0294    | -0.1040*      | 0.2103*            |
| isovalerate (C5)                 | t0         | -0.1214* | 0.2473*  | -0.015   | -0.0032  | -0.0019 | -0.0171          | 0.0275               | -0.0445        | -0.014   | 0.0336  | -0.1295*      | 0.012     | 0.0098        | -0.0226            |
|                                  | t24        | N/D      | N/D      | N/D      | N/D      | N/D     | N/D              | N/D                  | N/D            | N/D      | N/D     | N/D           | N/D       | N/D           | N/D                |
| caproate (6:0)                   | t0         | -0.0122  | 0.0177   | -0.1181* | -0.0071  | 0.0804  | -0.0253          | 0.0314               | -0.0254        | -0.0947  | 0.0256  | 0.0068        | 0.0018    | -0.1063*      | 0.0817             |
|                                  | t24        | 0.2234*  | -0.0635  | 0.0504   | 0.0111   | -0.0436 | -0.0375          | 0.0327               | -0.0242        | -0.0358  | -0.0233 | -0.0154       | -0.0801   | 0.0076        | 0.074              |
| heptanoate (7:0)                 | t0         | -0.0898  | 0.0421   | -0.0315  | -0.0181  | 0.1051* | -0.0327          | 0.0029               | -0.0336        | -0.072   | 0.0218  | -0.0113       | -0.0073   | -0.0269       | 0.0935             |
|                                  | t24        | 0.1852*  | -0.0785  | 0.0346   | 0.0017   | -0.0467 | -0.04            | 0.0224               | -0.0289        | -0.0203  | -0.0506 | -0.0212       | -0.1236*  | 0.0123        | 0.089              |
| caprylate (8:0)                  | t0         | -0.0056  | -0.0115  | 0.2642*  | -0.0135  | -0.0071 | -0.059           | 0.0458               | -0.0103        | -0.0376  | -0.0098 | -0.0154       | -0.0262   | -0.031        | -0.0175            |
|                                  | t24        | 0.2330*  | -0.1634* | 0.0523   | -0.0112  | -0.0275 | -0.0096          | 0.0077               | -0.044         | 0.0091   | -0.016  | -0.0276       | 0.031     | 0.0768        | 0.0023             |
| pelargonate (9:0)                | t0         | 0.0027   | 0.0676   | -0.0265  | -0.0196  | -0.0026 | -0.0162          | -0.0079              | -0.05          | -0.1085* | 0.0431  | 0.0068        | 0.0097    | -0.0114       | 0.1767*            |
|                                  | t24        | 0.2824*  | -0.0849  | 0.0293   | 0.0197   | -0.0249 | -0.0385          | 0.0397               | -0.0387        | -0.0062  | -0.0293 | -0.0147       | -0.0737   | 0.0205        | 0.0155             |
| caprate (10:0)                   | t0         | -0.0071  | -0.0233  | 0.2691*  | 0.0047   | -0.0113 | -0.0564          | 0.0378               | -0.0089        | -0.041   | 0.0075  | -0.0005       | -0.0219   | -0.0216       | -0.0226            |
|                                  | t24        | 0.1109*  | -0.1585* | 0.0179   | 0.0156   | -0.0382 | -0.0118          | 0.0005               | -0.0686        | 0.0019   | 0.006   | -0.0242       | 0.0044    | 0.0143        | -0.0236            |
| laurate (12:0)                   | t0         | 0.0123   | 0.0165   | 0.1684*  | -0.1025* | -0.0203 | -0.0069          | 0.0153               | 0.0229         | -0.0273  | 0.028   | 0.1438*       | 0.0461    | 0.0468        | -0.0028            |
|                                  | t24        | 0.0009   | -0.2797* | 0.1959*  | 0.0217   | 0.1164* | 0.0072           | 0.0072               | -0.0417        | -0.0179  | 0.0226  | -0.0478       | 0.047     | 0.0167        | 0.0616             |
| 5-dodecenoate (12:1n7)           | t0         | -0.002   | -0.0049  | 0.034    | 0.0106   | -0.0146 | 0.0068           | 0.0135               | 0.0551         | -0.0508  | 0.0557  | 0.5818*       | -0.0029   | 0.0217        | 0.0078             |
|                                  | t24        | -0.0351  | -0.1382* | -0.0043  | 0.1328*  | 0.0294  | 0.0209           | 0.028                | 0.0155         | -0.0178  | 0.084   | -0.0102       | 0.0398    | -0.0005       | 0.0222             |

| Biochemical Name             | Time Point | SIRS    | UCS      | SS      | Sshock   | SNS     | <i>S. aureus</i> | <i>S. pneumoniae</i> | <i>E. coli</i> | Gender   | Race     | Liver Disease | Hepatitis | Alcohol Abuse | Neoplastic Disease |
|------------------------------|------------|---------|----------|---------|----------|---------|------------------|----------------------|----------------|----------|----------|---------------|-----------|---------------|--------------------|
| myristate (14:0)             | t0         | 0.01    | -0.0196  | 0.0259  | -0.0892  | 0.0089  | -0.0224          | -0.0058              | 0.0232         | -0.0222  | -0.0041  | 0.2671*       | 0.0141    | 0.0238        | 0.0081             |
|                              | t24        | 0.0111  | -0.1741* | 0.1330* | 0.0169   | -0.0224 | 0.0068           | -0.0048              | 0.066          | -0.0375  | 0.0605   | -0.0557       | 0.0377    | -0.0121       | 0.0485             |
| myristoleate (14:1n5)        | t0         | 0.0226  | -0.069   | 0.0407  | -0.0645  | 0.0264  | -0.0191          | 0.04                 | 0.0054         | 0.0205   | -0.0005  | 0.5861*       | 0.0285    | 0.0481        | -0.0242            |
|                              | t24        | -0.0173 | -0.1114* | 0.1333* | 0.0249   | 0.0231  | 0.0032           | 0.0282               | 0.0171         | -0.0628  | 0.1969*  | 0.0088        | 0.1351*   | 0.0217        | 0.0278             |
| palmitate (16:0)             | t0         | 0.0452  | -0.0104  | 0.0008  | -0.0514  | 0.0277  | -0.0429          | -0.0271              | 0.019          | -0.0233  | -0.0158  | 0.0997        | -0.0009   | 0.0179        | -0.0042            |
|                              | t24        | 0.046   | -0.1492* | 0.0807  | -0.0162  | -0.0119 | -0.0118          | 0.0059               | 0.0382         | -0.0311  | 0.058    | -0.0579       | 0.0095    | -0.017        | 0.0542             |
| palmitoleate (16:1n7)        | t0         | 0.0232  | -0.052   | 0.0054  | -0.02    | 0.034   | -0.0233          | 0.0089               | 0.0076         | 0.0257   | -0.0199  | 0.5675*       | 0.0088    | 0.0359        | -0.0047            |
|                              | t24        | 0.0065  | -0.2378* | 0.0689  | 0.0019   | 0.0064  | -0.0252          | 0.0288               | 0.0625         | -0.032   | 0.1583*  | -0.0012       | 0.0708    | 0.0197        | 0.0371             |
| margarate (17:0)             | t0         | 0.0149  | 0.0308   | -0.0057 | -0.0421  | 0.0112  | -0.0153          | -0.0143              | 0.0118         | -0.1001* | -0.0101  | -0.0024       | -0.0101   | 0.0082        | -0.0089            |
|                              | t24        | -0.0077 | -0.0584  | 0.0374  | 0.0108   | 0.0037  | -0.0065          | -0.0046              | 0.0609         | -0.1031* | 0.01     | -0.1045*      | -0.0215   | -0.1027*      | 0.0332             |
| 10-heptadecenoate (17:1n7)   | t0         | 0.0194  | -0.0042  | -0.0104 | -0.0085  | 0.0211  | -0.0099          | -0.0201              | 0.0239         | -0.0222  | -0.0051  | 0.2083*       | -0.0005   | 0.0132        | -0.0004            |
|                              | t24        | 0.0196  | -0.1127* | 0.065   | -0.0268  | 0.0372  | -0.0116          | -0.0077              | 0.1111*        | -0.0675  | 0.0187   | -0.0327       | 0.038     | -0.0537       | 0.1400*            |
| stearate (18:0)              | t0         | 0.0388  | 0.0032   | -0.0093 | -0.1397* | 0.0153  | -0.015           | -0.0062              | 0.0091         | -0.0521  | -0.0255  | 0.0253        | -0.0119   | 0.0545        | -0.0142            |
|                              | t24        | -0.0078 | -0.037   | 0.0346  | -0.0131  | -0.0091 | 0.0018           | 0.0087               | 0.0501         | -0.028   | -0.0052  | -0.1403*      | -0.0004   | -0.0727       | 0.0599             |
| oleate (18:1n9)              | t0         | 0.0183  | -0.0314  | 0.0072  | -0.0279  | 0.1506* | -0.0359          | -0.0444              | 0.0101         | -0.0079  | -0.0008  | 0.0704        | -0.0064   | 0.0069        | -0.0372            |
|                              | t24        | -0.0351 | -0.097   | 0.1173* | -0.0048  | 0.039   | -0.033           | 0.022                | 0.0475         | -0.059   | 0.1104*  | -0.0385       | -0.018    | -0.0209       | 0.033              |
| vacenate (18:1n7)            | t0         | -0.0192 | -0.0409  | 0.0606  | -0.0341  | 0.1483* | -0.0035          | 0.0213               | 0.0952         | -0.0318  | 0.0276   | 0.3157*       | 0.1535*   | 0.018         | -0.0087            |
|                              | t24        | N/D     | N/D      | N/D     | N/D      | N/D     | N/D              | N/D                  | N/D            | N/D      | N/D      | N/D           | N/D       | N/D           | N/D                |
| linoleate (18:2n6)           | t0         | 0.0034  | -0.0095  | -0.0019 | -0.0147  | 0.0181  | -0.0499          | -0.0095              | 0.0039         | -0.0414  | -0.0103  | 0.091         | -0.0002   | -0.0045       | -0.0028            |
|                              | t24        | 0.0109  | -0.1115* | 0.1390* | -0.012   | -0.0086 | -0.0486          | 0.0203               | -0.0036        | -0.069   | 0.0603   | -0.0906       | 0.006     | -0.0109       | 0.0258             |
| stearidonate (18:4n3)        | t0         | 0.0914  | 0.0169   | -0.009  | -0.0078  | -0.0353 | -0.0155          | -0.0068              | -0.0139        | -0.2556* | 0.0047   | 0.0102        | -0.0033   | 0.0183        | 0.0319             |
|                              | t24        | 0.0123  | -0.0206  | -0.0214 | 0.1058*  | -0.0109 | -0.0114          | -0.0204              | -0.0147        | -0.0501  | 0.1374*  | -0.0418       | -0.0248   | -0.0456       | -0.0029            |
| nonadecanoate (19:0)         | t0         | N/D     | N/D      | N/D     | N/D      | N/D     | N/D              | N/D                  | N/D            | N/D      | N/D      | N/D           | N/D       | N/D           | N/D                |
|                              | t24        | 0.0112  | -0.0681  | 0.0547  | 0.0178   | -0.0524 | 0.0237           | -0.0305              | 0.0566         | -0.0348  | 0.0228   | -0.1002*      | 0.0033    | -0.0781       | 0.0115             |
| 10-nonadecenoate (19:1n9)    | t0         | -0.0002 | 0.0021   | -0.0095 | -0.0201  | 0.0294  | -0.0126          | -0.0248              | 0.0259         | -0.0052  | 0.0155   | 0.0919        | -0.0039   | 0.0053        | -0.0084            |
|                              | t24        | -0.014  | -0.1293* | 0.0526  | 0.0055   | 0.0612  | 0.0202           | 0.0316               | 0.0751         | -0.0149  | 0.0059   | -0.0488       | 0.0178    | -0.0499       | 0.02               |
| eicosenoate (20:1n9 or 1n11) | t0         | 0.0193  | -0.0483  | 0.001   | -0.1003* | 0.074   | -0.0232          | 0.0197               | 0.0081         | -0.0053  | -0.0112  | 0.3667*       | -0.0136   | 0.0086        | -0.0187            |
|                              | t24        | -0.013  | -0.1512* | 0.0758  | 0.0118   | 0.0159  | -0.0116          | 0.0369               | 0.0111         | -0.028   | 0.0271   | -0.0369       | 0.0245    | -0.0042       | 0.024              |
| dihomolinoleate (20:2n6)     | t0         | 0.0169  | 0.003    | -0.0072 | -0.0302  | 0.0464  | -0.0476          | 0.015                | -0.0088        | 0.0001   | -0.0149  | 0.3197*       | -0.0236   | 0.0193        | -0.0093            |
|                              | t24        | -0.0203 | -0.1765* | 0.0513  | 0.0717   | -0.0103 | -0.0698          | 0.0286               | 0.0398         | -0.0338  | 0.0306   | -0.0193       | -0.0232   | -0.0268       | 0.003              |
| arachidonate (20:4n6)        | t0         | 0.0346  | -0.0289  | -0.0122 | -0.0412  | 0.2006* | -0.0376          | -0.0008              | 0.0098         | 0.0033   | -0.0053  | 0.0788        | 0.0043    | -0.018        | 0.0404             |
|                              | t24        | 0.0326  | -0.1452* | 0.0227  | 0.0799   | -0.0413 | -0.0369          | 0.0238               | -0.0039        | -0.008   | 0.1580*  | -0.027        | -0.0189   | -0.0782       | 0.0047             |
| adrenate (22:4n6)            | t0         | 0.0273  | -0.0091  | -0.0134 | -0.0329  | 0.0799  | -0.0477          | 0.0137               | 0.0099         | -0.0017  | -0.0389  | 0.4090*       | -0.0153   | 0.0008        | 0.0122             |
|                              | t24        | 0.0133  | -0.2867* | 0.0647  | -0.0009  | 0.0007  | -0.0673          | 0.2161*              | 0.1125*        | -0.0146  | 0.0565   | -0.0404       | 0.0082    | -0.0447       | 0.0309             |
| 3-hydroxydecanoate           | t0         | N/D     | N/D      | N/D     | N/D      | N/D     | N/D              | N/D                  | N/D            | N/D      | N/D      | N/D           | N/D       | N/D           | N/D                |
|                              | t24        | -0.0259 | -0.0206  | -0.0225 | -0.0075  | 0.1059* | 0.1734*          | 0.0119               | 0.0002         | -0.0177  | -0.0143  | -0.0022       | 0.1469*   | -0.0142       | 0.2737*            |
| 2-hydroxystearate            | t0         | 0.0024  | 0.0236   | -0.0013 | -0.0715  | 0.027   | -0.0201          | 0.0183               | -0.008         | -0.0367  | 0.0813   | 0.2506*       | 0.0007    | 0.0096        | -0.0025            |
|                              | t24        | -0.0004 | -0.0132  | 0.0084  | 0.0155   | -0.0163 | -0.0095          | 0.0036               | -0.0245        | -0.0252  | 0.1537*  | -0.0008       | 0.0023    | -0.0384       | 0.0003             |
| 2-hydroxypalmitate           | t0         | 0.0051  | -0.0206  | -0.008  | -0.0111  | 0.0606  | 0.0053           | 0.0225               | -0.0178        | -0.0045  | 0.1143*  | 0.4027*       | 0.018     | 0.011         | 0.0071             |
|                              | t24        | -0.013  | -0.0461  | 0.049   | 0.0949   | -0.0445 | 0.0114           | 0.0156               | -0.0598        | -0.0279  | 0.2947*  | -0.0127       | 0.0234    | -0.0476       | -0.0035            |
| hexadecanedioate (C16)       | t0         | -0.0248 | -0.0013  | 0.0046  | -0.0328  | 0.0546  | 0                | 0.0541               | -0.0041        | 0.1058*  | -0.0931  | 0.4854*       | -0.0046   | -0.007        | -0.0088            |
|                              | t24        | -0.0113 | -0.0205  | -0.0291 | -0.0129  | 0.1898* | 0.0126           | 0.0583               | -0.0156        | 0.0616   | -0.0461  | 0.3904*       | 0.0507    | -0.0164       | 0.0248             |
| octadecanedioate (C18)       | t0         | -0.0101 | 0.0077   | -0.0178 | -0.0353  | 0.0838  | -0.018           | 0.1241*              | -0.0019        | 0.0093   | -0.0212  | 0.4555*       | -0.0058   | -0.0123       | 0.0039             |
|                              | t24        | -0.034  | -0.0142  | -0.0296 | 0.0159   | 0.1478* | 0.0189           | 0.0764               | -0.011         | 0.1132*  | 0.001    | 0.1394*       | 0.0588    | -0.0519       | -0.0128            |
| CMPF                         | t0         | 0.0932  | 0.0471   | 0.0217  | -0.0617  | -0.0389 | -0.0162          | -0.0054              | 0.0163         | -0.0005  | -0.0495  | -0.036        | -0.0507   | -0.0597       | 0.0477             |
|                              | t24        | 0.0695  | -0.0098  | 0.1026* | -0.0338  | -0.0254 | 0.0409           | -0.0177              | 0.0022         | 0.0243   | -0.1082* | -0.0215       | -0.0369   | -0.0266       | 0.0434             |
| deoxycarnitine               | t0         | -0.0262 | 0.0095   | -0.0015 | 0.0037   | -0.0088 | 0.1452*          | 0.0264               | 0.0048         | -0.0078  | 0.0878   | -0.0499       | 0.0274    | 0.0121        | -0.1789*           |
|                              | t24        | -0.0395 | -0.0051  | 0.0251  | -0.0518  | 0.1821* | 0.0489           | 0.0501               | -0.0297        | -0.0148  | 0.0577   | -0.0753       | 0.1528*   | 0.0299        | -0.0595            |
| carnitine                    | t0         | 0.0231  | 0.0549   | 0.0298  | -0.1142* | -0.0202 | 0.2712*          | 0.0662               | -0.0261        | 0.065    | -0.0023  | -0.0693       | 0.0162    | 0.0188        | 0.0072             |
|                              | t24        | 0.0501  | -0.0359  | 0.035   | -0.3913* | 0.0023  | 0.0437           | -0.023               | -0.01          | 0.0238   | 0.1013*  | -0.0309       | 0.0385    | 0.0152        | -0.0172            |

| Biochemical Name               | Time Point | SIRS    | UCS      | SS       | Sshock  | SNS     | <i>S. aureus</i> | <i>S. pneumoniae</i> | <i>E. coli</i> | Gender   | Race     | Liver Disease | Hepatitis | Alcohol Abuse | Neoplastic Disease |
|--------------------------------|------------|---------|----------|----------|---------|---------|------------------|----------------------|----------------|----------|----------|---------------|-----------|---------------|--------------------|
| 3-dehydrocarnitine             | t0         | 0.0115  | 0.0219   | 0.3185*  | -0.0908 | -0.0088 | 0.0154           | 0.0045               | 0.0551         | -0.0018  | 0.0226   | 0.0493        | 0.0411    | 0.009         | -0.0072            |
|                                | t24        | -0.0074 | -0.0035  | 0.0396   | -0.0343 | 0.0076  | 0.0351           | -0.0108              | 0.1100*        | -0.0137  | 0.1053*  | -0.0026       | 0.3218*   | 0.0081        | 0.0274             |
| acetylcarnitine (C2)           | t0         | -0.0082 | -0.0533  | 0.0425   | -0.0206 | 0.0674  | 0.0389           | -0.0266              | -0.0021        | 0.0231   | 0.0354   | 0.06          | -0.0022   | 0.0233        | -0.0113            |
|                                | t24        | -0.0104 | -0.0561  | 0.0153   | 0.0003  | 0.2243* | 0.0289           | -0.0334              | -0.0084        | 0.0254   | 0.0364   | -0.0095       | 0.0459    | -0.0115       | 0.0063             |
| glutaroylcarnitine (C5)        | t0         | 0.0059  | -0.0238  | 0.0074   | -0.0156 | 0.1363* | 0.012            | 0.1869*              | 0.008          | -0.004   | -0.0237  | 0.0265        | -0.0135   | 0.1539*       | -0.0349            |
|                                | t24        | 0.0169  | 0.0041   | 0.012    | -0.0291 | 0.5764* | 0.0658           | 0.0344               | -0.0099        | -0.0051  | -0.0124  | 0.0281        | 0.064     | 0.0235        | 0.0119             |
| methylglutaroylcarnitine (C6)  | t0         | -0.0366 | -0.0114  | 0.0327   | -0.0091 | 0.2905* | 0.0043           | -0.0129              | -0.0106        | 0.035    | 0.0103   | 0.0071        | 0.0139    | -0.0526       | -0.0561            |
|                                | t24        | -0.0286 | -0.0101  | -0.013   | 0.0021  | 0.3617* | 0.0026           | -0.049               | -0.007         | -0.0176  | -0.0058  | 0.0031        | 0.0054    | -0.0381       | -0.0325            |
| succinoylcarnitine (C4)        | t0         | 0.0494  | -0.0301  | -0.0077  | -0.0654 | 0.0634  | -0.0265          | 0.0229               | -0.0442        | 0.0205   | -0.0412  | -0.0059       | 0.0129    | 0.0005        | -0.0107            |
|                                | t24        | -0.0129 | -0.0168  | -0.1267* | 0.0058  | 0.0938  | -0.0673          | -0.0215              | -0.0007        | -0.0759  | -0.0677  | -0.0055       | 0.2024*   | 0.0078        | -0.0356            |
| hexanoylcarnitine (C6)         | t0         | -0.0033 | -0.0699  | 0.0234   | -0.0094 | 0.2517* | 0.0011           | 0.0118               | -0.0146        | 0.0478   | 0.0065   | 0.1030*       | 0.0183    | -0.0024       | -0.0418            |
|                                | t24        | -0.0026 | -0.0309  | 0.0155   | 0.0094  | 0.5418* | 0.0111           | 0.0078               | -0.0067        | -0.0048  | 0.0253   | -0.0185       | 0.2104*   | -0.0034       | 0.0102             |
| octanoylcarnitine (C8)         | t0         | 0.0744  | -0.1138* | -0.0069  | -0.0308 | 0.1882* | -0.0188          | 0.0754               | -0.0162        | 0.0342   | -0.024   | 0.0034        | -0.0062   | -0.0033       | -0.0362            |
|                                | t24        | -0.0102 | -0.03    | -0.0077  | 0.0084  | 0.4899* | -0.0016          | 0.0361               | -0.009         | 0.0023   | 0.0026   | -0.0174       | 0.0188    | 0.0019        | -0.0164            |
| 2-octenoylcarnitine (C8)       | t0         | N/D     | N/D      | N/D      | N/D     | N/D     | N/D              | N/D                  | N/D            | N/D      | N/D      | N/D           | N/D       | N/D           | N/D                |
|                                | t24        | -0.0164 | -0.0133  | -0.0044  | 0.0117  | 0.2883* | 0.0849           | -0.065               | -0.0106        | -0.0383  | 0.0333   | -0.0216       | 0.2621*   | -0.0309       | 0.0025             |
| decanoylcarnitine (C10)        | t0         | 0.0502  | -0.0766  | -0.0127  | -0.0422 | 0.1778* | -0.0245          | 0.0977               | -0.022         | 0.0138   | -0.0407  | -0.0049       | -0.0143   | -0.0066       | -0.035             |
|                                | t24        | 0.0019  | -0.0217  | -0.0226  | -0.0147 | 0.3470* | -0.0574          | 0.0716               | -0.0104        | 0.0079   | 0.0051   | -0.0227       | 0.0007    | -0.005        | -0.0246            |
| laurylcarnitine (C12)          | t0         | 0.0018  | 0.0009   | -0.0066  | -0.0394 | 0.079   | -0.0075          | 0.0476               | -0.0016        | -0.0565  | -0.0204  | 0.03          | 0.0144    | 0.0167        | -0.0247            |
|                                | t24        | 0.0099  | 0.0061   | 0.1230*  | -0.0522 | -0.0274 | -0.0279          | 0.0903               | -0.0074        | -0.0183  | -0.0347  | 0.0337        | 0.0272    | 0.0088        | 0.2610*            |
| palmitoylcarnitine (C16)       | t0         | 0.0529  | -0.027   | -0.0005  | -0.0668 | 0.0619  | -0.0104          | 0.0133               | -0.0034        | -0.0462  | -0.0115  | 0.2886*       | 0.0015    | 0.0522        | 0.0037             |
|                                | t24        | 0.1025* | -0.0019  | 0.0115   | -0.0154 | -0.0047 | 0.0021           | 0.0255               | 0.0324         | 0.0138   | -0.0293  | 0.0508        | -0.0318   | -0.0021       | 0.0023             |
| cholate                        | t0         | N/D     | N/D      | N/D      | N/D     | N/D     | N/D              | N/D                  | N/D            | N/D      | N/D      | N/D           | N/D       | N/D           | N/D                |
|                                | t24        | 0.038   | -0.0727  | 0.029    | 0.0138  | -0.0283 | -0.0174          | -0.0182              | 0.1302*        | -0.0182  | 0.0113   | -0.0385       | -0.0174   | 0.2220*       | -0.0137            |
| glycocholate                   | t0         | 0.0038  | 0.0105   | 0.1359*  | -0.0334 | -0.0073 | 0.0862           | -0.0092              | -0.0137        | -0.018   | 0.0584   | 0.4151*       | -0.0194   | 0.0044        | -0.0053            |
|                                | t24        | -0.0134 | -0.0112  | 0.1688*  | -0.019  | -0.0038 | -0.0134          | 0.1007*              | 0.0191         | -0.0075  | 0.1851*  | 0.0095        | 0.1106*   | 0.1786*       | -0.0235            |
| taurocholate                   | t0         | -0.0019 | -0.0019  | 0.1079*  | -0.0597 | 0.005   | 0.075            | -0.0102              | -0.0139        | -0.0166  | 0.0728   | 0.4464*       | -0.0046   | -0.0014       | -0.0146            |
|                                | t24        | -0.0247 | -0.0318  | 0.1338*  | -0.019  | 0.0235  | 0.0019           | 0.0158               | 0.0168         | -0.0383  | 0.1674*  | 0.0273        | 0.2180*   | 0.0501        | 0.0088             |
| taurochenodeoxycholate         | t0         | 0.0042  | -0.0059  | 0.2534*  | -0.0561 | -0.0036 | 0.0399           | -0.0144              | -0.01          | -0.0177  | 0.08     | 0.4295*       | -0.0005   | 0.0277        | -0.0156            |
|                                | t24        | 0.0065  | -0.0116  | 0.1617*  | -0.025  | -0.0005 | -0.047           | 0.1059*              | 0.0256         | -0.0154  | 0.3791*  | 0.021         | 0.1450*   | 0.0388        | -0.0138            |
| ursodeoxycholate               | t0         | N/D     | N/D      | N/D      | N/D     | N/D     | N/D              | N/D                  | N/D            | N/D      | N/D      | N/D           | N/D       | N/D           | N/D                |
|                                | t24        | -0.0014 | -0.0099  | 0.0761   | -0.0335 | -0.0041 | 0.0731           | -0.1510*             | -0.0019        | 0.2859*  | 0.0046   | -0.0457       | -0.0216   | 0.1043*       | -0.0032            |
| hyodeoxycholate                | t0         | N/D     | N/D      | N/D      | N/D     | N/D     | N/D              | N/D                  | N/D            | N/D      | N/D      | N/D           | N/D       | N/D           | N/D                |
|                                | t24        | 0.0191  | 0.0368   | -0.0212  | -0.0345 | -0.0102 | 0.0007           | -0.0646              | 0.2639*        | 0.0288   | -0.0175  | -0.0566       | -0.0004   | 0.0289        | 0.1199*            |
| deoxycholate                   | t0         | -0.0542 | 0.057    | -0.016   | 0.052   | -0.0291 | -0.0471          | -0.029               | 0.0166         | 0.006    | 0.0071   | -0.0118       | 0.1778*   | -0.0843       | 0.016              |
|                                | t24        | N/D     | N/D      | N/D      | N/D     | N/D     | N/D              | N/D                  | N/D            | N/D      | N/D      | N/D           | N/D       | N/D           | N/D                |
| glycodeoxycholate              | t0         | N/D     | N/D      | N/D      | N/D     | N/D     | N/D              | N/D                  | N/D            | N/D      | N/D      | N/D           | N/D       | N/D           | N/D                |
|                                | t24        | -0.011  | 0.1841*  | -0.0538  | 0.0134  | -0.0425 | 0.0135           | 0.0347               | -0.0086        | 0.0588   | 0.0181   | 0.0062        | -0.0071   | 0.0571        | -0.0025            |
| glycochenodeoxycholate         | t0         | 0.0026  | 0.0034   | 0.1819*  | -0.0562 | -0.0154 | 0.0633           | -0.007               | -0.017         | -0.0065  | 0.0672   | 0.4607*       | 0.0037    | 0.0023        | -0.0123            |
|                                | t24        | -0.0048 | 0.0048   | 0.2774*  | -0.026  | -0.0278 | 0.0066           | 0.0568               | 0.0239         | 0.0231   | 0.2018*  | 0.097         | 0.0863    | 0.1230*       | -0.0247            |
| tauroolithocholate 3-sulfate   | t0         | -0.0287 | 0.0973   | -0.0243  | -0.0335 | 0.0143  | -0.0116          | -0.0086              | 0.0948         | -0.0349  | 0.0206   | 0.0044        | -0.0135   | -0.0498       | -0.0154            |
|                                | t24        | -0.0282 | 0.1242*  | -0.0672  | -0.0273 | 0.0871  | 0.2227*          | 0.0151               | -0.0316        | -0.0364  | -0.0143  | -0.015        | 0.4109*   | -0.1091*      | 0.0157             |
| glycerol                       | t0         | 0.1660* | -0.1061* | 0.0125   | -0.0006 | -0.0025 | -0.055           | 0.0094               | 0.0007         | -0.0093  | -0.1961* | 0.0795        | -0.0539   | -0.0101       | 0.0094             |
|                                | t24        | 0.0668  | -0.1669* | 0.0218   | 0.0065  | -0.0019 | -0.0211          | 0.0046               | 0.0434         | -0.0272  | 0.0056   | 0.0052        | 0.0074    | 0.0477        | -0.0078            |
| choline                        | t0         | -0.0007 | -0.0405  | 0.0306   | 0.0875  | -0.0149 | 0.0302           | 0.0191               | -0.0141        | 0.0068   | -0.0137  | -0.0264       | 0.0701    | 0.0035        | -0.0177            |
|                                | t24        | -0.0321 | -0.017   | -0.004   | 0.0516  | 0.0069  | 0.0895           | 0.0136               | 0.0114         | -0.3160* | -0.032   | -0.0467       | 0.0444    | 0.0535        | -0.017             |
| glycerol 3-phosphate (G3P)     | t0         | 0.1261* | 0.0321   | -0.0431  | -0.0124 | -0.0103 | 0.0259           | 0.031                | -0.1029*       | -0.004   | -0.095   | -0.0475       | -0.0105   | -0.0101       | -0.0015            |
|                                | t24        | 0.058   | -0.0061  | -0.0193  | -0.0015 | 0.0193  | 0.0058           | -0.029               | 0.0092         | -0.025   | -0.0772  | -0.0295       | 0.0222    | 0.0509        | 0.2276*            |
| glycerophosphorylcholine (GPC) | t0         | N/D     | N/D      | N/D      | N/D     | N/D     | N/D              | N/D                  | N/D            | N/D      | N/D      | N/D           | N/D       | N/D           | N/D                |
|                                | t24        | 0.0183  | -0.0061  | 0.0406   | 0.0026  | -0.0622 | -0.0602          | 0.027                | -0.0049        | -0.0182  | -0.0522  | -0.0003       | -0.0403   | -0.0302       | 0.5822*            |



| Biochemical Name                | Time Point | SIRS    | UCS     | SS      | Sshock  | SNS      | <i>S. aureus</i> | <i>S. pneumoniae</i> | <i>E. coli</i> | Gender   | Race     | Liver Disease | Hepatitis | Alcohol Abuse | Neoplastic Disease |
|---------------------------------|------------|---------|---------|---------|---------|----------|------------------|----------------------|----------------|----------|----------|---------------|-----------|---------------|--------------------|
| myo-inositol                    | t0         | -0.0153 | -0.0101 | -0.0244 | 0.0315  | 0.0092   | -0.0336          | 0.0788               | -0.0093        | 0.0323   | -0.0488  | -0.0553       | -0.02     | -0.0139       | -0.0286            |
|                                 | t24        | -0.0109 | -0.0218 | -0.009  | -0.0006 | 0.3384*  | -0.0172          | 0.0342               | 0.0106         | 0.0136   | 0.0263   | -0.0494       | -0.0087   | -0.0199       | -0.0618            |
| scyllo-inositol                 | t0         | -0.0042 | -0.0369 | 0.0974  | 0.0114  | -0.0197  | -0.0064          | 0.1090*              | -0.0039        | -0.0061  | 0.0058   | -0.0508       | 0.0964    | -0.0004       | 0.0072             |
|                                 | t24        | -0.0328 | -0.0541 | 0.0273  | -0.0033 | 0.3020*  | 0.0043           | 0.0235               | 0.0089         | -0.0258  | 0.022    | -0.0434       | 0.0403    | 0.0168        | -0.0146            |
| 3-hydroxybutyrate (BHBA)        | t0         | -0.0028 | -0.0367 | 0.0013  | -0.0006 | 0.1108*  | -0.0097          | -0.0268              | -0.0055        | 0.0288   | 0.0001   | 0.0231        | -0.0364   | -0.0054       | -0.0309            |
|                                 | t24        | -0.0493 | -0.0834 | 0.1461* | 0.0044  | 0.021    | -0.0164          | 0.0755               | 0.0411         | -0.0217  | -0.0055  | -0.0021       | -0.026    | -0.0871       | 0.0821             |
| acetoacetate                    | t0         | 0.0036  | -0.0551 | -0.0081 | -0.03   | 0.2502*  | -0.037           | -0.0691              | -0.0158        | 0.0107   | -0.0012  | 0.048         | -0.0492   | 0.0166        | -0.0227            |
|                                 | t24        | N/D     | N/D     | N/D     | N/D     | N/D      | N/D              | N/D                  | N/D            | N/D      | N/D      | N/D           | N/D       | N/D           | N/D                |
| 1-oleoylglycerophosphate (18:1) | t0         | N/D     | N/D     | N/D     | N/D     | N/D      | N/D              | N/D                  | N/D            | N/D      | N/D      | N/D           | N/D       | N/D           | N/D                |
|                                 | t24        | 0.2191* | -0.026  | -0.0828 | 0.0365  | -0.0201  | -0.0229          | 0.0318               | 0.0264         | 0.0601   | 0.0421   | 0.006         | -0.0002   | -0.0256       | -0.0153            |
| 1-oleoyl-GPE (18:1)             | t0         | 0.0699  | 0.0047  | 0.0142  | -0.0084 | -0.0424  | -0.0262          | 0.1283*              | -0.0031        | 0.0316   | -0.0354  | 0.0294        | 0.0118    | 0.0179        | -0.031             |
|                                 | t24        | -0.0032 | 0.0451  | -0.0018 | 0.017   | -0.0357  | -0.0036          | 0.1001*              | -0.0202        | 0.0566   | -0.0288  | 0.0027        | -0.0186   | -0.0139       | -0.0151            |
| 1-linoleoyl-GPE (18:2)          | t0         | N/D     | N/D     | N/D     | N/D     | N/D      | N/D              | N/D                  | N/D            | N/D      | N/D      | N/D           | N/D       | N/D           | N/D                |
|                                 | t24        | 0.0394  | 0.0342  | -0.0129 | 0.0045  | -0.1649* | 0.0027           | 0.0415               | -0.0113        | 0.0376   | -0.0843  | -0.0242       | 0.0236    | 0.0477        | -0.0217            |
| 1-arachidoyl-GPE (20:4)         | t0         | 0.2091* | -0.0239 | -0.0456 | 0.0333  | -0.0103  | -0.0253          | -0.0003              | -0.0162        | -0.05    | -0.1163* | -0.0451       | 0.0068    | 0.0158        | 0.0686             |
|                                 | t24        | 0.3868* | 0.0104  | -0.006  | 0.0223  | -0.0897  | -0.0032          | 0.0378               | -0.0091        | 0.0703   | -0.0417  | -0.0084       | 0.0036    | 0.025         | -0.0289            |
| 1-myristoyl-GPC (14:0)          | t0         | N/D     | N/D     | N/D     | N/D     | N/D      | N/D              | N/D                  | N/D            | N/D      | N/D      | N/D           | N/D       | N/D           | N/D                |
|                                 | t24        | 0.1290* | -0.038  | 0.0865  | 0.0006  | -0.1957* | 0.0243           | 0.0045               | -0.0244        | 0.0143   | -0.022   | -0.0198       | -0.0723   | -0.0966       | 0.0134             |
| 1-palmitoyl-GPC (16:0)          | t0         | 0.025   | 0.0107  | -0.008  | -0.0144 | -0.0095  | 0.0219           | 0.0003               | -0.025         | -0.1283* | -0.0252  | 0.0032        | -0.0002   | 0.032         | 0.0204             |
|                                 | t24        | 0.1293* | -0.0157 | 0.066   | -0.0168 | -0.1398* | -0.0307          | 0.0621               | -0.0107        | 0.0081   | -0.0813  | -0.0206       | -0.0635   | -0.046        | 0.0503             |
| 2-palmitoyl-GPC (16:0)          | t0         | 0.0028  | 0.031   | -0.0232 | -0.0047 | -0.0007  | 0.0282           | 0.0322               | 0.0029         | -0.0846  | -0.0308  | -0.0129       | 0.016     | 0.0389        | -0.0118            |
|                                 | t24        | 0.1298* | 0.0007  | 0.2102* | -0.0327 | -0.1623* | -0.0187          | 0.0532               | -0.0136        | 0.0061   | -0.0517  | -0.0117       | -0.0284   | -0.0746       | 0.1060*            |
| 1-palmitoleoyl-GPC* (16:1)      | t0         | 0.021   | -0.0041 | -0.0286 | 0.0243  | -0.0295  | 0.0264           | 0.0089               | -0.0187        | -0.014   | -0.0294  | 0.0466        | 0.0602    | 0.0374        | 0.001              |
|                                 | t24        | 0.0635  | -0.0262 | 0.0439  | -0.0003 | -0.1526* | -0.0109          | 0.0903               | -0.0334        | 0.0619   | -0.089   | 0.0062        | -0.0031   | -0.019        | 0.0328             |
| 1-stearoyl-GPC (18:0)           | t0         | 0.0394  | -0.0104 | -0.0073 | -0.0244 | 0.0036   | 0.0387           | 0.0157               | -0.0574        | -0.1061* | -0.0082  | 0.0226        | 0.007     | 0.0782        | -0.0132            |
|                                 | t24        | 0.3393* | 0.003   | 0.1069* | -0.009  | -0.0847  | -0.0181          | 0.1067*              | -0.0252        | 0.0047   | -0.0626  | -0.0052       | -0.0265   | -0.0456       | 0.0735             |
| 2-stearoyl-GPC (18:0)           | t0         | N/D     | N/D     | N/D     | N/D     | N/D      | N/D              | N/D                  | N/D            | N/D      | N/D      | N/D           | N/D       | N/D           | N/D                |
|                                 | t24        | 0.2781* | 0.0156  | 0.077   | -0.0174 | -0.1239* | -0.0282          | 0.0438               | -0.0605        | 0.0129   | -0.0576  | -0.0072       | -0.0299   | -0.0442       | 0.0492             |
| 1-oleoyl-GPC (18:1)             | t0         | -0.0001 | -0.0004 | -0.0182 | -0.0024 | 0.0077   | 0.0188           | 0.0755               | -0.0208        | -0.0524  | -0.0119  | 0.0532        | 0.0578    | 0.023         | 0.0156             |
|                                 | t24        | 0.1589* | -0.0154 | 0.0611  | 0.0002  | -0.08    | -0.0363          | 0.1051*              | -0.0121        | 0.02     | -0.0902  | -0.001        | -0.0256   | -0.0195       | 0.061              |
| 1-linoleoyl-GPC (18:2)          | t0         | -0.0025 | 0.0671  | -0.0301 | -0.0015 | -0.015   | 0.0165           | 0.0549               | -0.0331        | -0.0421  | -0.0055  | -0.0001       | 0.0168    | 0.007         | 0.0056             |
|                                 | t24        | 0.0399  | 0.0117  | 0.0934  | -0.0255 | -0.2003* | -0.003           | 0.0162               | -0.0437        | 0.0137   | -0.084   | -0.0197       | -0.0174   | -0.0172       | 0.0717             |
| 1-eicosatrienoyl-GPC* (20:3)    | t0         | 0.0066  | 0.0009  | -0.0069 | -0.0031 | -0.0022  | -0.0237          | 0.0036               | -0.0319        | -0.0723  | 0.001    | -0.0614       | -0.0027   | -0.0026       | 0.0058             |
|                                 | t24        | 0.2029* | -0.0294 | 0.1424* | -0.0159 | -0.1407* | -0.0403          | 0.0413               | -0.0216        | -0.0017  | -0.0284  | -0.0262       | -0.044    | -0.0279       | 0.1236*            |
| 1-arachidoyl-GPC (20:4)         | t0         | -0.0158 | -0.0019 | -0.0454 | 0.0002  | 0.0721   | -0.0014          | 0.0517               | 0.002          | -0.0317  | -0.0299  | 0.0005        | 0.0492    | -0.0084       | 0.0642             |
|                                 | t24        | 0.0649  | 0.0001  | 0.1205* | -0.0139 | -0.09    | -0.0334          | 0.0424               | -0.0277        | 0.0121   | -0.089   | -0.0202       | -0.0413   | -0.0443       | 0.2044*            |
| 1-stearoyl-GPI (18:0)           | t0         | 0.0444  | 0.0056  | -0.0392 | -0.0462 | 0.0195   | -0.0223          | 0.0956               | -0.0381        | 0.0298   | -0.0566  | 0.3019*       | -0.0137   | 0.0165        | -0.0058            |
|                                 | t24        | N/D     | N/D     | N/D     | N/D     | N/D      | N/D              | N/D                  | N/D            | N/D      | N/D      | N/D           | N/D       | N/D           | N/D                |
| 1-arachidoyl-GPI (20:4)         | t0         | 0.0055  | 0.0211  | -0.03   | 0.0017  | 0.0084   | -0.0167          | 0.0842               | -0.039         | 0.054    | -0.054   | 0.0117        | -0.0268   | 0.0016        | 0.0049             |
|                                 | t24        | 0.2997* | -0.0652 | -0.0201 | 0.1494* | -0.0399  | 0.0573           | 0.0083               | -0.0717        | 0.0656   | -0.0561  | -0.0547       | 0.0175    | -0.0337       | 0.0263             |
| 1-palmitoylglycerol (16:0)      | t0         | -0.0209 | -0.0002 | -0.0161 | 0.0562  | -0.0188  | 0.0381           | 0.0282               | -0.0382        | -0.0417  | -0.0119  | -0.0386       | -0.0177   | 0.0277        | -0.0397            |
|                                 | t24        | 0.1192* | 0.1572* | -0.0202 | -0.0665 | -0.1223* | -0.0043          | -0.0275              | 0.0261         | 0.0078   | -0.0154  | 0.0051        | -0.0186   | 0.0844        | -0.0401            |
| 1-stearoylglycerol (18:0)       | t0         | 0.0254  | 0.0597  | -0.0472 | 0.0037  | -0.0603  | 0.0086           | 0.0393               | -0.0626        | -0.1631* | -0.1324* | -0.0085       | -0.0395   | 0.0345        | -0.0112            |
|                                 | t24        | 0.0679  | 0.0382  | 0.0213  | -0.0945 | -0.0192  | 0.0527           | 0.0224               | -0.0225        | 0.01     | -0.0089  | 0.0494        | -0.0229   | 0.0311        | -0.1024*           |
| lathosterol                     | t0         | 0.2255* | 0.0714  | 0.0009  | -0.0315 | -0.0377  | -0.0175          | -0.016               | 0.0515         | 0.3151*  | -0.0576  | -0.0014       | 0.0048    | 0.0382        | -0.0731            |
|                                 | t24        | N/D     | N/D     | N/D     | N/D     | N/D      | N/D              | N/D                  | N/D            | N/D      | N/D      | N/D           | N/D       | N/D           | N/D                |
| cholesterol                     | t0         | 0.1999* | -0.0254 | -0.0427 | -0.0363 | 0.0881   | 0.0188           | 0.0736               | -0.045         | -0.0305  | 0.0007   | 0.05          | 0.0255    | -0.0076       | -0.0662            |
|                                 | t24        | 0.0249  | -0.0202 | -0.0298 | -0.0287 | 0.0372   | 0.0407           | 0.0055               | 0.037          | -0.0138  | -0.0082  | 0.0246        | -0.042    | -0.0049       | -0.015             |
| DHEA-S                          | t0         | -0.0593 | 0.2333* | -0.0353 | 0.0034  | 0.0093   | 0.0773           | -0.0148              | -0.0528        | -0.0326  | 0.0624   | -0.0231       | -0.0939   | -0.0071       | -0.043             |
|                                 | t24        | -0.0815 | 0.0535  | -0.0184 | 0.0466  | 0.0019   | 0.0329           | -0.0575              | -0.0146        | -0.0164  | 0.1219*  | -0.0244       | -0.0511   | -0.0595       | -0.04              |

| Biochemical Name                   | Time Point | SIRS    | UCS      | SS      | Sshock   | SNS     | <i>S. aureus</i> | <i>S. pneumoniae</i> | <i>E. coli</i> | Gender   | Race    | Liver Disease | Hepatitis | Alcohol Abuse | Neoplastic Disease |
|------------------------------------|------------|---------|----------|---------|----------|---------|------------------|----------------------|----------------|----------|---------|---------------|-----------|---------------|--------------------|
| epiandrosterone sulfate            | t0         | -0.029  | 0.3878*  | -0.0122 | 0.0014   | -0.0068 | 0.0618           | -0.0281              | -0.0227        | -0.0384  | 0.0504  | -0.0265       | -0.0542   | 0.0105        | -0.003             |
|                                    | t24        | -0.0456 | 0.1079*  | -0.0123 | -0.0081  | -0.001  | -0.0095          | -0.0006              | -0.0068        | -0.0145  | 0.0761  | -0.0313       | -0.0261   | -0.2139*      | 0.0051             |
| androsterone sulfate               | t0         | -0.0336 | 0.4636*  | -0.01   | 0.0184   | 0.0026  | 0.0332           | 0.0022               | -0.0449        | -0.0119  | 0.0776  | -0.0245       | -0.0358   | -0.0382       | -0.0132            |
|                                    | t24        | -0.0744 | 0.2010*  | -0.0347 | 0.009    | 0.0067  | 0.0234           | 0.0025               | -0.0235        | -0.0032  | 0.0413  | -0.0164       | -0.0212   | -0.1295*      | -0.0183            |
| cortisol                           | t0         | -0.0321 | -0.0139  | 0.0436  | -0.0667  | 0.0799  | 0.0068           | 0.0023               | -0.0688        | -0.0447  | 0.2147* | 0.036         | -0.0114   | -0.0063       | -0.1838*           |
|                                    | t24        | -0.0629 | 0.0006   | 0.2080* | 0.0117   | -0.0053 | -0.0121          | 0.0535               | 0.0043         | -0.0116  | -0.053  | -0.0048       | -0.0163   | -0.0411       | 0.3665*            |
| cortisone                          | t0         | N/D     | N/D      | N/D     | N/D      | N/D     | N/D              | N/D                  | N/D            | N/D      | N/D     | N/D           | N/D       | N/D           | N/D                |
|                                    | t24        | -0.0836 | 0.0565   | 0.0482  | -0.076   | -0.0015 | 0.2333*          | 0.0049               | -0.0182        | -0.0602  | 0.0406  | 0.018         | -0.0644   | -0.0157       | 0.0154             |
| beta-sitosterol                    | t0         | -0.0039 | -0.0065  | 0.0126  | 0.0151   | -0.0247 | -0.0156          | -0.0095              | -0.035         | -0.0404  | 0.0053  | 0.5638*       | 0.037     | 0.0637        | -0.0096            |
|                                    | t24        | N/D     | N/D      | N/D     | N/D      | N/D     | N/D              | N/D                  | N/D            | N/D      | N/D     | N/D           | N/D       | N/D           | N/D                |
| 7-HOCA                             | t0         | -0.0036 | -0.0025  | 0.084   | -0.085   | 0.0173  | 0.0261           | 0.0948               | -0.0094        | -0.0022  | 0.0178  | 0.4928*       | 0.0513    | 0.1974*       | -0.0042            |
|                                    | t24        | -0.0021 | -0.0333  | 0.0598  | -0.0346  | 0.0593  | 0.0136           | 0.0317               | -0.0007        | -0.0199  | 0.0432  | 0.2690*       | 0.4825*   | 0.0176        | 0.026              |
| xanthine                           | t0         | 0.0185  | -0.0247  | 0.0092  | 0.0034   | -0.0207 | 0.0096           | -0.0057              | -0.009         | -0.0313  | 0.1055* | -0.0206       | 0.035     | 0.1224*       | -0.0551            |
|                                    | t24        | -0.0068 | -0.0164  | -0.0049 | -0.0177  | 0.0483  | 0.2611*          | 0.0055               | -0.0013        | -0.0284  | 0.033   | -0.0161       | 0.1584*   | -0.0042       | 0.2755*            |
| hypoxanthine                       | t0         | -0.0219 | -0.0056  | -0.023  | 0.1474*  | -0.0001 | 0.0324           | -0.038               | 0.009          | -0.0252  | 0.0272  | -0.0476       | -0.0098   | 0.0059        | -0.0623            |
|                                    | t24        | 0.0093  | 0.0894   | 0.1073* | -0.1411* | -0.0651 | -0.0394          | -0.0233              | 0.1452*        | -0.0049  | 0.0474  | -0.0951       | 0.045     | -0.0083       | -0.0024            |
| 1-methyladenosine                  | t0         | -0.0015 | -0.1547* | 0.0181  | 0.0182   | 0.0095  | 0.0073           | 0.0559               | -0.0195        | 0.0325   | 0.0677  | 0.0614        | 0.0704    | 0.0232        | -0.058             |
|                                    | t24        | -0.0149 | -0.1270* | -0.0138 | 0.0605   | 0.2129* | -0.0247          | 0.0351               | -0.0082        | 0.0095   | -0.0031 | 0.0174        | 0.0202    | -0.0058       | -0.0653            |
| AMP                                | t0         | 0.0143  | -0.0748  | -0.0195 | 0.0816   | 0.0079  | -0.0697          | 0.0065               | 0.0232         | 0.1130*  | 0.0326  | 0.0099        | -0.0229   | -0.0217       | -0.0497            |
|                                    | t24        | -0.0338 | 0.0128   | -0.0276 | -0.0047  | 0.0972  | 0.1244*          | -0.0202              | 0.0133         | -0.0297  | -0.0215 | -0.0044       | 0.2060*   | -0.0145       | 0.2876*            |
| N2,N2-dimethylguanosine            | t0         | -0.0293 | -0.0342  | 0.0179  | 0.0041   | 0.1904* | 0.0061           | 0.0049               | -0.0356        | 0.046    | 0.0302  | 0.0205        | 0.0152    | 0.0788        | -0.0408            |
|                                    | t24        | -0.0535 | 0.0178   | -0.021  | -0.0314  | 0.1528* | 0.0566           | 0.0362               | -0.0344        | 0.0054   | 0.0282  | -0.0302       | 0.0355    | 0.1639*       | 0.0494             |
| N6-carbamoylthreonyl-adenosine     | t0         | -0.073  | -0.0773  | 0.0001  | 0.0658   | 0.0243  | 0.033            | 0.0036               | -0.0153        | 0.2768*  | 0.0204  | -0.0245       | 0.0002    | 0.1025*       | 0.0202             |
|                                    | t24        | -0.0344 | -0.0329  | -0.0208 | 0.0527   | 0.2595* | 0.086            | -0.0124              | -0.0179        | -0.0125  | 0.011   | -0.0123       | 0.1159*   | -0.024        | 0.1485*            |
| urate                              | t0         | 0.1084* | -0.081   | 0.1151* | -0.1055* | 0.0196  | -0.0133          | -0.0097              | 0.0264         | 0.0166   | -0.0032 | -0.0769       | 0.019     | 0.3445*       | -0.0098            |
|                                    | t24        | 0.0218  | -0.0708  | -0.0066 | 0.0214   | 0.0048  | -0.0134          | 0.0208               | 0.0265         | -0.0407  | -0.0085 | -0.1932*      | 0.0616    | 0.2115*       | 0.1020*            |
| allantoin                          | t0         | 0.0116  | -0.0679  | -0.0074 | 0.0389   | 0.0504  | -0.0142          | 0.3516*              | -0.0196        | 0.0019   | -0.0257 | -0.0089       | 0.0198    | 0.0285        | -0.0065            |
|                                    | t24        | -0.0336 | -0.0735  | 0.0006  | 0.0239   | 0.1525* | 0.0307           | 0.0365               | 0.0141         | -0.0653  | 0.0036  | -0.0443       | 0.0412    | -0.0004       | 0.0167             |
| uridine                            | t0         | 0.0057  | -0.0038  | -0.0033 | 0.0396   | -0.0293 | 0.016            | 0.0167               | -0.0261        | -0.0049  | -0.0145 | -0.0212       | 0.072     | 0.0834        | 0.0159             |
|                                    | t24        | 0.0147  | -0.0082  | 0.0117  | 0.0395   | -0.0349 | -0.0263          | -0.0167              | 0.0248         | -0.0876  | 0.0621  | -0.1060*      | -0.0126   | -0.0194       | 0.0012             |
| pseudouridine                      | t0         | -0.0189 | -0.1302* | 0.0083  | 0.0084   | 0.1489* | -0.0044          | 0.0441               | 0.0071         | 0.1928*  | 0.0151  | 0.0968        | 0.0933    | 0.0166        | -0.0213            |
|                                    | t24        | -0.0255 | -0.0244  | -0.0031 | 0.0432   | 0.4568* | 0.0565           | 0.0155               | -0.0035        | 0.0203   | -0.0137 | -0.032        | 0.1516*   | -0.0044       | 0.043              |
| gulono-1,4-lactone                 | t0         | -0.0116 | 0.008    | 0.0524  | 0.0166   | -0.0496 | 0.0078           | -0.0211              | 0.0431         | -0.0337  | -0.0062 | 0.027         | 0.0364    | -0.0715       | -0.01              |
|                                    | t24        | -0.0234 | -0.0349  | -0.0227 | -0.0021  | 0.1795* | 0.0702           | -0.061               | -0.0411        | -0.0909  | -0.003  | -0.0079       | 0.1374*   | -0.0045       | 0.0744             |
| threonate                          | t0         | -0.0046 | -0.0343  | 0.003   | 0.0709   | -0.0137 | -0.0882          | -0.0079              | 0.0089         | -0.0007  | 0.0204  | 0.0855        | 0.0016    | -0.0355       | 0.0558             |
|                                    | t24        | 0.004   | -0.0208  | 0.0037  | 0.0217   | -0.0225 | -0.0645          | 0.0034               | 0.0122         | 0.0114   | -0.0209 | -0.0106       | -0.0499   | -0.0181       | 0.0521             |
| heme                               | t0         | 0.0021  | -0.0015  | -0.0387 | 0.2265*  | -0.0621 | 0.0519           | 0.0242               | 0.0158         | 0.0454   | 0.1111* | 0.009         | 0.0113    | -0.013        | -0.0009            |
|                                    | t24        | -0.0739 | 0.006    | -0.0068 | -0.0043  | 0.0554  | 0.1061*          | -0.0175              | 0.013          | -0.0119  | -0.0587 | -0.0124       | 0.1906*   | -0.0203       | 0.4018*            |
| bilirubin                          | t0         | -0.0397 | 0.1390*  | 0.2410* | -0.0446  | -0.0113 | -0.0115          | 0.0202               | 0.0094         | -0.0681  | 0.0606  | 0.1123*       | 0.0196    | 0.1171*       | -0.0241            |
|                                    | t24        | -0.0008 | -0.0198  | 0.3643* | -0.0132  | 0.0143  | -0.1356*         | 0.1386*              | -0.0169        | -0.0853  | 0.0417  | 0.0301        | 0.2554*   | 0.1092*       | -0.0358            |
| bilirubin (E,E)                    | t0         | -0.0086 | 0.0326   | 0.3292* | -0.0592  | 0.0012  | 0.0048           | 0.002                | -0.0044        | -0.075   | 0.1298* | 0.2127*       | 0.0274    | 0.0701        | -0.0223            |
|                                    | t24        | 0.0112  | -0.0094  | 0.5306* | -0.0138  | -0.0119 | -0.0715          | 0.0593               | -0.008         | -0.0243  | 0.2466* | 0.0243        | 0.0437    | 0.0466        | 0.0293             |
| bilirubin(E,Z or Z,E)              | t0         | 0.0043  | 0.0565   | 0.1945* | -0.1513* | -0.0308 | -0.0152          | 0.014                | 0.034          | -0.2435* | 0.05    | 0.1895*       | 0.0584    | 0.0424        | 0.0114             |
|                                    | t24        | N/D     | N/D      | N/D     | N/D      | N/D     | N/D              | N/D                  | N/D            | N/D      | N/D     | N/D           | N/D       | N/D           | N/D                |
| biliverdin                         | t0         | -0.021  | 0.0318   | 0.2921* | -0.069   | -0.0156 | -0.0136          | 0.0374               | 0.0161         | -0.0994  | 0.1314* | 0.1262*       | 0.0373    | 0.0844        | -0.0136            |
|                                    | t24        | -0.0403 | -0.0048  | 0.4129* | 0.004    | -0.0186 | -0.1518*         | 0.0178               | 0.0109         | -0.0392  | 0.0722  | 0.0068        | 0.1179*   | 0.0113        | 0.0928             |
| trigonelline (N'-methylnicotinate) | t0         | N/D     | N/D      | N/D     | N/D      | N/D     | N/D              | N/D                  | N/D            | N/D      | N/D     | N/D           | N/D       | N/D           | N/D                |
|                                    | t24        | 0.0912  | 0.0003   | -0.0377 | 0.051    | -0.0706 | -0.0258          | 0.0773               | -0.0209        | 0.0007   | -0.0574 | -0.0167       | 0.0228    | 0.1198*       | -0.0119            |
| pantothenate (Vitamin B5)          | t0         | -0.0318 | -0.0975  | 0.0097  | 0.1179*  | -0.0168 | -0.1220*         | -0.1091*             | -0.0024        | -0.0386  | 0.0114  | 0.0495        | -0.009    | -0.0409       | 0.0136             |
|                                    | t24        | -0.0145 | -0.0619  | -0.0034 | 0.053    | 0.0092  | -0.0381          | -0.0635              | 0.0004         | -0.068   | 0.0786  | 0.0128        | -0.0474   | -0.0415       | 0.0078             |

| Biochemical Name               | Time Point | SIRS     | UCS     | SS       | Sshock  | SNS      | <i>S. aureus</i> | <i>S. pneumoniae</i> | <i>E. coli</i> | Gender   | Race     | Liver Disease | Hepatitis | Alcohol Abuse | Neoplastic Disease |
|--------------------------------|------------|----------|---------|----------|---------|----------|------------------|----------------------|----------------|----------|----------|---------------|-----------|---------------|--------------------|
| alpha-tocopherol               | t0         | 0.0421   | -0.0258 | -0.0192  | -0.0131 | 0.0418   | -0.0105          | -0.0058              | 0.0005         | -0.0534  | -0.0441  | 0.022         | -0.009    | -0.0238       | 0.0108             |
|                                | t24        | 0.1126*  | -0.0342 | -0.1418* | 0.0243  | 0.0056   | -0.0096          | -0.0222              | 0.0893         | -0.1495* | -0.0007  | 0.0019        | -0.0664   | -0.0183       | 0.0312             |
| pyridoxate                     | t0         | -0.0457  | -0.0312 | -0.0345  | 0.0689  | 0.0426   | 0.044            | -0.0218              | -0.0027        | -0.0346  | -0.015   | 0.0063        | 0.0601    | -0.0334       | 0.3051*            |
|                                | t24        | 0.0059   | -0.0405 | -0.0068  | 0.4754* | -0.0041  | -0.0399          | -0.0083              | -0.021         | -0.0149  | -0.0281  | -0.019        | -0.0136   | -0.0167       | 0.014              |
| hippurate                      | t0         | 0.0752   | -0.0139 | -0.0223  | -0.013  | 0.0224   | -0.0799          | -0.015               | -0.0261        | 0.0108   | -0.024   | -0.0187       | 0.1565*   | 0.1073*       | -0.0303            |
|                                | t24        | 0.0078   | -0.0253 | -0.022   | 0.0059  | 0.0699   | -0.0061          | -0.0061              | -0.0372        | 0.0043   | -0.0798  | 0.0418        | 0.0853    | 0.1570*       | -0.045             |
| catechol sulfate               | t0         | -0.0105  | -0.0033 | -0.0275  | 0.1723* | -0.0232  | -0.0401          | 0.0676               | 0.0046         | -0.0269  | -0.0166  | -0.0392       | 0.1487*   | 0.0621        | -0.0249            |
|                                | t24        | 0.0003   | 0.2638* | -0.0144  | 0.0153  | -0.0593  | -0.0002          | 0.038                | 0.1468*        | 0.0558   | -0.0571  | -0.0265       | -0.0293   | 0.0227        | -0.0118            |
| 4-vinylphenol sulfate          | t0         | 0.0045   | 0.0533  | -0.0373  | 0.0196  | -0.0445  | -0.0168          | 0.01                 | -0.0298        | -0.0448  | -0.0334  | -0.0303       | 0         | 0.0682        | -0.0177            |
|                                | t24        | 0.0359   | 0.0271  | -0.0472  | -0.0315 | 0.0147   | -0.004           | 0.1386*              | -0.0163        | 0.0159   | -0.0657  | -0.0355       | 0.0046    | 0.1062*       | -0.0254            |
| glycolate (hydroxyacetate)     | t0         | N/D      | N/D     | N/D      | N/D     | N/D      | N/D              | N/D                  | N/D            | N/D      | N/D      | N/D           | N/D       | N/D           | N/D                |
|                                | t24        | 0.0231   | 0.2867* | -0.0223  | -0.0047 | -0.0593  | 0.0261           | 0.0119               | -0.0324        | 0.0188   | 0.022    | 0.0502        | -0.0119   | 0.0085        | 0.0109             |
| iminodiacetate (IDA)           | t0         | -0.0129  | 0.1067* | 0.0077   | -0.0009 | -0.0383  | 0.0042           | -0.0679              | 0.0798         | -0.089   | 0.0367   | -0.0001       | 0.0173    | -0.0106       | 0.0133             |
|                                | t24        | 0.0718   | 0.0278  | -0.0089  | 0.0002  | -0.1001* | 0.0979           | -0.0415              | -0.024         | -0.1009* | 0.0404   | 0.0107        | -0.0059   | -0.0022       | 0.0147             |
| salicyluric glucuronide        | t0         | N/D      | N/D     | N/D      | N/D     | N/D      | N/D              | N/D                  | N/D            | N/D      | N/D      | N/D           | N/D       | N/D           | N/D                |
|                                | t24        | 0.3012*  | -0.0313 | -0.0125  | -0.0279 | -0.0023  | -0.0219          | -0.0037              | 0.0014         | -0.0475  | -0.0107  | -0.0097       | -0.0126   | -0.0505       | 0.0428             |
| 4-acetaminophen sulfate        | t0         | 0.0068   | 0.0533  | -0.0197  | 0.0247  | -0.1272* | -0.0126          | -0.03                | 0.0615         | 0.0381   | -0.0198  | -0.0645       | 0.0299    | 0.0025        | -0.0231            |
|                                | t24        | -0.1282* | 0.0505  | -0.0194  | 0.0246  | -0.0041  | 0.1619*          | -0.0586              | 0.0026         | -0.0366  | -0.1005* | -0.0336       | 0.1125*   | -0.0138       | -0.0188            |
| 4-acetamidophenol              | t0         | 0.0217   | 0.05    | -0.0216  | 0.0246  | -0.1054* | -0.0014          | -0.0162              | 0.0086         | 0.0649   | -0.0072  | -0.0552       | 0.0201    | -0.0148       | -0.02              |
|                                | t24        | -0.0483  | 0.1617* | -0.0033  | 0.0034  | -0.0001  | 0.1795*          | -0.0552              | -0.0065        | -0.0365  | -0.0699  | -0.0519       | 0.0512    | -0.0276       | -0.058             |
| p-acetamidophenylglucuronide   | t0         | -0.0039  | 0.0549  | -0.0037  | 0.0194  | -0.1089* | -0.0212          | -0.0688              | 0.1101*        | 0.1251*  | -0.0194  | -0.069        | 0.1783*   | 0.0153        | -0.0431            |
|                                | t24        | -0.1282* | 0.0417  | -0.0046  | 0.0344  | -0.0251  | 0.0223           | -0.0884              | 0.0199         | -0.0009  | -0.1001* | -0.0317       | 0.075     | -0.0177       | -0.0139            |
| 2-hydroxyacetaminophen sulfate | t0         | 0.0108   | 0.0734  | -0.0436  | 0.0083  | -0.0823  | -0.0108          | -0.0176              | -0.0061        | 0.0241   | -0.0299  | -0.0558       | 0.014     | 0.0311        | -0.0384            |
|                                | t24        | -0.1024* | 0.0446  | -0.0599  | 0.02    | 0.0071   | 0.0643           | -0.0692              | -0.0176        | -0.0636  | -0.1137* | 0             | 0.003     | -0.0846       | -0.0437            |
| 2-methoxyacetaminophen sulfate | t0         | -0.0213  | 0.0642  | -0.02    | 0.0462  | -0.1085* | 0.0005           | -0.0053              | 0.008          | 0.0956   | 0.0189   | -0.0657       | 0.0559    | 0.0191        | -0.0206            |
|                                | t24        | -0.1329* | 0.0417  | -0.0205  | 0.0312  | -0.0063  | 0.2364*          | -0.0799              | -0.0355        | -0.0159  | -0.0295  | -0.0449       | 0.059     | -0.0088       | -0.0198            |
| 3-(cystein-S-yl)acetaminophen  | t0         | -0.0188  | 0.0807  | -0.0025  | 0.0185  | -0.0473  | -0.0085          | -0.05                | 0.0316         | 0.0242   | -0.0036  | -0.0445       | 0.3527*   | -0.0324       | -0.037             |
|                                | t24        | -0.0372  | 0.2642* | -0.0262  | 0.0079  | -0.0159  | 0.1222*          | -0.0145              | -0.0143        | -0.0307  | -0.0064  | -0.0138       | 0.0592    | -0.035        | -0.0311            |
| ibuprofen                      | t0         | N/D      | N/D     | N/D      | N/D     | N/D      | N/D              | N/D                  | N/D            | N/D      | N/D      | N/D           | N/D       | N/D           | N/D                |
|                                | t24        | 0.0144   | -0.0643 | -0.0092  | 0.1056* | -0.0309  | -0.0142          | -0.0135              | -0.011         | 0.2071*  | -0.0228  | -0.0171       | -0.0225   | -0.0154       | -0.0136            |
| hydroquinone sulfate           | t0         | N/D      | N/D     | N/D      | N/D     | N/D      | N/D              | N/D                  | N/D            | N/D      | N/D      | N/D           | N/D       | N/D           | N/D                |
|                                | t24        | -0.0118  | 0.0077  | -0.0148  | 0.2783* | -0.0494  | 0.0148           | 0.0702               | 0.0989         | 0.0271   | -0.011   | -0.0786       | 0.0614    | 0.0026        | -0.0286            |
| galactonate                    | t0         | 0.1867*  | 0.0212  | 0.0098   | -0.0497 | -0.0635  | -0.0476          | 0.1796*              | -0.0189        | 0.0204   | -0.0706  | 0.0096        | -0.0227   | -0.0038       | -0.045             |
|                                | t24        | -0.0006  | 0.1074* | -0.0083  | -0.0073 | -0.0204  | -0.01            | 0.0354               | -0.0133        | 0.0539   | 0.0004   | -0.0015       | -0.0292   | -0.0292       | -0.0132            |
| quinatate                      | t0         | 0.0009   | 0.0076  | -0.021   | 0.0806  | -0.0242  | -0.0801          | 0.0274               | -0.012         | -0.0034  | 0.0032   | -0.0291       | 0.1264*   | -0.026        | 0.0134             |
|                                | t24        | 0.0275   | 0.0252  | -0.037   | 0.0685  | -0.0483  | -0.0202          | 0.037                | 0.0071         | -0.0296  | -0.0675  | -0.0209       | 0.0652    | 0.2459*       | 0.0002             |
| piperine                       | t0         | 0.0125   | 0.0137  | 0.1721*  | -0.0151 | -0.1     | -0.0516          | 0.3061*              | 0.0182         | -0.064   | 0.0015   | -0.0222       | 0.0471    | 0.0911        | 0.0487             |
|                                | t24        | -0.0198  | 0.0167  | 0.1898*  | 0.0036  | -0.0968  | -0.01            | 0.2406*              | 0.0167         | 0.001    | 0.0086   | -0.0327       | 0.0209    | 0.0538        | 0.0068             |
| caffeine                       | t0         | 0.0025   | -0.0117 | 0.0573   | -0.0727 | 0.0361   | 0.0011           | 0.0295               | -0.041         | 0.0228   | 0.0044   | 0.6064*       | 0.0467    | 0.0143        | -0.0132            |
|                                | t24        | -0.0015  | -0.0355 | 0.0623   | -0.0128 | 0.0108   | 0.0042           | 0.1401*              | -0.0219        | -0.0288  | 0.0093   | 0.1801*       | 0.1890*   | 0.2147*       | -0.0275            |
| 1-methylurate                  | t0         | N/D      | N/D     | N/D      | N/D     | N/D      | N/D              | N/D                  | N/D            | N/D      | N/D      | N/D           | N/D       | N/D           | N/D                |
|                                | t24        | -0.0213  | -0.0217 | -0.0269  | 0.01    | 0.2864*  | 0.023            | -0.0394              | -0.0138        | -0.0258  | -0.0234  | -0.0185       | 0.0197    | -0.0239       | -0.0055            |
| erythritol                     | t0         | -0.0469  | -0.0717 | 0.0185   | 0.1730* | 0.0172   | -0.1229*         | 0.0593               | 0.0625         | -0.0006  | -0.0178  | 0.09          | 0.0703    | 0.0012        | -0.0017            |
|                                | t24        | -0.0442  | -0.036  | -0.032   | 0.062   | 0.2857*  | 0.0376           | -0.0113              | 0.0187         | -0.0166  | -0.0217  | -0.0186       | 0.1244*   | -0.0231       | 0.0567             |
| X-01911                        | t0         | N/D      | N/D     | N/D      | N/D     | N/D      | N/D              | N/D                  | N/D            | N/D      | N/D      | N/D           | N/D       | N/D           | N/D                |
|                                | t24        | -0.004   | 0.0032  | 0.4953*  | 0.0143  | -0.0369  | -0.0038          | 0.0254               | 0.039          | 0.0172   | 0.0057   | -0.1009*      | 0.0295    | 0.2262*       | 0.0037             |
| X-02249                        | t0         | -0.0023  | 0.0862  | 0.0346   | -0.043  | -0.0686  | 0.0109           | 0.0296               | 0.0025         | 0.0263   | -0.0306  | -0.0239       | 0.0246    | 0.0957        | -0.0168            |
|                                | t24        | -0.0078  | 0.0716  | 0.0333   | -0.0204 | -0.0143  | 0.0127           | 0.1788*              | -0.007         | 0.0178   | -0.0626  | -0.0553       | 0.0359    | 0.0435        | -0.0036            |
| X-03056                        | t0         | -0.0779  | -0.0809 | 0.0239   | 0.0981  | 0.0129   | 0.0491           | 0.021                | -0.0054        | 0.0035   | 0.0092   | -0.0476       | 0.0297    | -0.0047       | 0.0113             |
|                                | t24        | -0.078   | -0.0204 | -0.0156  | 0.0407  | 0.2830*  | 0.0964           | -0.0163              | -0.0105        | -0.0008  | -0.0237  | -0.0558       | 0.1669*   | -0.0516       | 0.0921             |

| Biochemical Name                  | Time Point | SIRS    | UCS      | SS      | Sshock   | SNS      | <i>S. aureus</i> | <i>S. pneumoniae</i> | <i>E. coli</i> | Gender   | Race     | Liver Disease | Hepatitis | Alcohol Abuse | Neoplastic Disease |
|-----------------------------------|------------|---------|----------|---------|----------|----------|------------------|----------------------|----------------|----------|----------|---------------|-----------|---------------|--------------------|
| X-06126                           | t0         | -0.0482 | 0.0344   | -0.0152 | 0.1699*  | -0.0753  | 0.0069           | 0.0265               | -0.0093        | 0.0117   | 0.0026   | -0.1011*      | -0.0478   | -0.0211       | -0.0064            |
|                                   | t24        | -0.0215 | 0.0748   | -0.0617 | 0.0959   | -0.0648  | 0.0096           | 0.0146               | 0.1112*        | 0.042    | -0.0302  | -0.1587*      | -0.0153   | -0.09         | -0.0189            |
| X-07765                           | t0         | 0.1317* | 0.0105   | -0.0661 | -0.0056  | -0.1065* | -0.0224          | 0.0031               | -0.0154        | 0.0104   | -0.0651  | -0.0475       | 0.0334    | 0.0071        | -0.0384            |
|                                   | t24        | 0.1384* | 0.0909   | -0.0043 | -0.0766  | -0.0474  | 0.0295           | 0.0022               | -0.0285        | 0.05     | -0.066   | -0.0315       | 0.0324    | 0.0366        | -0.0262            |
| X-09789                           | t0         | 0.0322  | 0.0151   | 0.0762  | -0.0303  | -0.0743  | -0.1098*         | 0.0585               | 0.0175         | 0.0035   | 0.0139   | -0.0437       | 0.0807    | 0.1220*       | 0.0067             |
|                                   | t24        | 0.0108  | -0.0375  | 0.1148* | 0.018    | -0.0593  | -0.0221          | 0.0482               | 0.0049         | -0.0044  | 0.0283   | -0.0797       | 0.1856*   | 0.2944*       | -0.0208            |
| X-11204                           | t0         | 0.1433* | 0.0293   | -0.002  | -0.0522  | -0.0456  | 0.0251           | -0.0369              | -0.0074        | -0.0602  | 0.001    | 0.0506        | 0.0211    | 0.0331        | 0.0116             |
|                                   | t24        | 0.0615  | 0.0126   | 0.0658  | -0.0545  | -0.0349  | -0.0237          | 0.0181               | -0.0846        | -0.0127  | -0.0266  | 0.0262        | -0.0133   | -0.0012       | 0.0845             |
| X-11244                           | t0         | -0.0179 | 0.0972   | -0.0262 | -0.0191  | 0.0071   | 0.0168           | 0.0268               | -0.0174        | 0.0214   | -0.0331  | 0.0124        | -0.0459   | 0.3400*       | -0.0221            |
|                                   | t24        | -0.0442 | 0.0578   | -0.039  | -0.0016  | 0.0164   | 0.0141           | 0.0932               | -0.0166        | 0.0101   | -0.0427  | 0.0265        | -0.0961   | 0.1738*       | -0.0302            |
| X-11245                           | t0         | -0.0329 | 0.0866   | -0.0448 | -0.0878  | 0.1069*  | 0.0257           | 0.0958               | -0.055         | -0.0065  | -0.0451  | 0.2975*       | -0.0283   | 0.0198        | -0.0448            |
|                                   | t24        | -0.036  | 0.0633   | -0.0248 | -0.0157  | 0.4503*  | 0.0222           | 0.0844               | -0.0008        | -0.0182  | -0.067   | 0.1346*       | 0.0181    | -0.0008       | -0.0242            |
| X-11255                           | t0         | -0.0226 | 0.1217*  | 0.1355* | -0.0624  | -0.0119  | 0.0316           | -0.0678              | 0.0695         | -0.0181  | 0.1751*  | 0.0306        | 0.0543    | 0.0021        | 0.0387             |
|                                   | t24        | -0.0187 | 0.1945*  | 0.0746  | -0.1205* | -0.0037  | 0.0163           | -0.0557              | 0.2191*        | -0.012   | 0.0258   | 0.0063        | 0.1937*   | 0.0184        | 0.0696             |
| X-11261                           | t0         | -0.0207 | -0.0086  | 0.0209  | 0.0598   | -0.0275  | -0.0333          | 0.0971               | -0.0234        | 0.0525   | -0.0819  | -0.006        | 0.0126    | 0.0182        | -0.0169            |
|                                   | t24        | -0.0191 | 0.0191   | 0.0315  | -0.0206  | -0.0088  | -0.0012          | 0.0028               | -0.0152        | 0.0229   | 0.0139   | -0.0408       | 0.1357*   | 0.0323        | 0.0042             |
| X-11273                           | t0         | -0.0385 | 0.0763   | -0.0624 | -0.0071  | 0.046    | 0.1592*          | -0.0115              | -0.0201        | -0.0962  | -0.0034  | -0.0491       | -0.0643   | 0.0233        | -0.0832            |
|                                   | t24        | -0.0278 | 0.0237   | -0.051  | -0.0408  | 0.0878   | 0.0287           | -0.036               | 0.0244         | -0.1302* | 0.0058   | -0.0465       | -0.002    | -0.0946       | -0.0474            |
| X-11282                           | t0         | -0.02   | 0.1492*  | 0.005   | -0.0431  | -0.0055  | -0.0344          | 0.0899               | 0.0213         | -0.1047* | -0.0198  | 0.1049*       | 0.0218    | 0.0124        | -0.0198            |
|                                   | t24        | -0.0135 | 0.0024   | -0.0115 | 0.0072   | 0.2106*  | 0.0846           | 0.0027               | -0.0132        | -0.012   | -0.0277  | 0.0161        | 0.2063*   | -0.0113       | 0.2624*            |
| X-11299                           | t0         | 0.0243  | 0.0049   | 0.0013  | 0.0083   | -0.0315  | -0.0278          | 0.1351*              | 0.003          | -0.021   | -0.0571  | -0.0353       | -0.0077   | 0.0955        | 0.0161             |
|                                   | t24        | -0.0035 | 0.0364   | 0.0217  | -0.0393  | -0.0146  | 0.0122           | 0.0895               | -0.0078        | -0.0059  | -0.0288  | -0.069        | 0.0421    | 0.2199*       | 0.0299             |
| X-11302                           | t0         | -0.0061 | 0.3372*  | 0.0029  | -0.0202  | 0.0075   | 0.0225           | 0.0022               | -0.0204        | -0.0785  | 0.0154   | 0.0491        | -0.0332   | 0.0158        | -0.0495            |
|                                   | t24        | -0.0638 | 0.0296   | -0.0197 | -0.0425  | 0.2213*  | 0.0403           | -0.0031              | 0.0181         | -0.095   | 0.022    | -0.0043       | 0.0742    | -0.1150*      | -0.0111            |
| X-11303                           | t0         | -0.0145 | 0.2726*  | -0.0205 | -0.0292  | 0.0066   | -0.0039          | -0.0102              | 0.075          | -0.0848  | 0.0037   | -0.0008       | 0.0006    | -0.0219       | -0.0116            |
|                                   | t24        | -0.0235 | 0.0662   | -0.0879 | 0.0025   | 0.0035   | 0.2694*          | 0.0339               | -0.0477        | -0.0195  | 0.0062   | -0.0449       | 0.3882*   | -0.0594       | -0.0026            |
| X-11308                           | t0         | -0.0335 | 0.1321*  | 0.0954  | -0.0756  | -0.0167  | 0.0001           | 0.0077               | 0.0108         | -0.0469  | -0.0092  | -0.0055       | 0.016     | 0.0245        | 0.0458             |
|                                   | t24        | -0.028  | 0.0209   | 0.032   | -0.0751  | 0.0353   | 0.023            | 0.0355               | -0.0567        | -0.0498  | 0.006    | -0.0266       | 0.1257*   | -0.0193       | 0.013              |
| X-11315                           | t0         | -0.0181 | 0.0061   | 0.1257* | -0.0065  | -0.0123  | 0.0148           | -0.0132              | -0.0673        | 0.0094   | 0.0425   | 0.001         | -0.0007   | 0.0165        | 0.0929             |
|                                   | t24        | -0.0158 | 0.0219   | 0.1912* | -0.0789  | -0.0009  | 0.0358           | -0.0693              | -0.0268        | 0.0342   | 0.016    | -0.0255       | 0.0204    | 0.019         | 0.1502*            |
| X-11317                           | t0         | 0.0536  | -0.0154  | -0.018  | 0.0021   | -0.0013  | -0.0357          | 0.0285               | -0.1080*       | -0.0559  | -0.026   | 0.0032        | 0.004     | 0.0737        | 0.0202             |
|                                   | t24        | 0.0729  | -0.0252  | -0.0263 | 0.0052   | -0.0137  | 0.0099           | 0.012                | -0.0109        | -0.0497  | -0.1096* | -0.0099       | -0.019    | 0.0858        | -0.0288            |
| X-11327                           | t0         | 0.0797  | 0.0039   | 0.0196  | -0.0303  | -0.0606  | 0.0147           | -0.0306              | -0.0115        | -0.0291  | -0.0028  | 0.0008        | -0.004    | 0.0328        | 0.0014             |
|                                   | t24        | 0.0749  | 0.0022   | 0.0625  | -0.0563  | -0.0453  | -0.103           | -0.0002              | -0.0556        | -0.0033  | -0.0307  | 0.0179        | -0.0383   | 0.0087        | 0.013              |
| X-11333                           | t0         | N/D     | N/D      | N/D     | N/D      | N/D      | N/D              | N/D                  | N/D            | N/D      | N/D      | N/D           | N/D       | N/D           | N/D                |
|                                   | t24        | 0.0031  | -0.0303  | -0.0016 | -0.034   | 0.2161*  | 0.0163           | -0.0034              | -0.0154        | -0.07    | 0.0056   | -0.0509       | 0.0674    | 0.0045        | 0.0204             |
| X-11334                           | t0         | -0.0013 | -0.1344* | -0.0084 | 0.0667   | 0.0126   | -0.0199          | 0.005                | 0.1373*        | -0.0229  | -0.0199  | -0.052        | 0.0158    | -0.0413       | -0.0779            |
|                                   | t24        | -0.0232 | -0.0733  | -0.0119 | 0.0312   | 0.2490*  | 0.0306           | 0.0223               | 0.0644         | -0.041   | 0.004    | -0.0472       | 0.088     | -0.0429       | 0.0189             |
| X-11381                           | t0         | -0.0146 | -0.031   | 0.0243  | 0.0227   | 0.0019   | 0.2599*          | -0.0064              | 0.0129         | 0.0128   | 0.0675   | 0.0412        | -0.0116   | 0.0044        | 0.0033             |
|                                   | t24        | -0.0123 | -0.0521  | -0.0123 | -0.0031  | 0.0725   | 0.012            | -0.004               | 0.0176         | -0.009   | 0.0696   | 0.0093        | 0.0094    | 0.0026        | -0.0142            |
| X-11400                           | t0         | N/D     | N/D      | N/D     | N/D      | N/D      | N/D              | N/D                  | N/D            | N/D      | N/D      | N/D           | N/D       | N/D           | N/D                |
|                                   | t24        | -0.01   | 0.0045   | -0.0444 | -0.0184  | 0.0292   | -0.0186          | -0.084               | 0.068          | -0.0087  | 0.1801*  | 0             | -0.0123   | -0.0615       | 0.0055             |
| X-11412                           | t0         | N/D     | N/D      | N/D     | N/D      | N/D      | N/D              | N/D                  | N/D            | N/D      | N/D      | N/D           | N/D       | N/D           | N/D                |
|                                   | t24        | 0.0954  | 0.0241   | -0.002  | -0.0355  | -0.0418  | 0.031            | 0.0034               | 0.0512         | -0.0243  | -0.1782* | -0.0674       | -0.0537   | 0.01          | 0.0054             |
| X-11421 (4-cis-decenoylcarnitine) | t0         | 0.0261  | -0.0292  | -0.0131 | -0.0206  | 0.3155*  | -0.0319          | 0.0762               | -0.0489        | 0.0039   | -0.0136  | -0.021        | -0.0067   | 0.0046        | -0.0372            |
|                                   | t24        | -0.031  | -0.0239  | -0.0029 | -0.0014  | 0.3100*  | -0.0033          | 0.0036               | -0.0098        | -0.0113  | 0.1026*  | -0.036        | 0.0134    | -0.0087       | -0.0794            |
| X-11422                           | t0         | N/D     | N/D      | N/D     | N/D      | N/D      | N/D              | N/D                  | N/D            | N/D      | N/D      | N/D           | N/D       | N/D           | N/D                |
|                                   | t24        | -0.0149 | 0.0017   | -0.0059 | -0.0074  | 0.0503   | 0.1416*          | -0.0112              | 0.0093         | -0.1053* | 0.0008   | -0.0283       | 0.1279*   | 0.0055        | 0.0373             |
| X-11423                           | t0         | -0.0779 | -0.1752* | -0.0163 | 0.1193*  | 0.0522   | 0.0228           | 0.0001               | -0.0017        | 0.0281   | 0.0226   | 0.003         | 0.0333    | -0.031        | -0.0267            |
|                                   | t24        | -0.0289 | -0.1270* | -0.0723 | 0.0885   | 0.1411*  | 0.0535           | 0.0246               | 0.0021         | 0.0228   | 0.0006   | -0.0779       | 0.0911    | -0.045        | -0.0338            |

| Biochemical Name | Time Point | SIRS     | UCS     | SS      | Sshock   | SNS      | <i>S. aureus</i> | <i>S. pneumoniae</i> | <i>E. coli</i> | Gender   | Race     | Liver Disease | Hepatitis | Alcohol Abuse | Neoplastic Disease |
|------------------|------------|----------|---------|---------|----------|----------|------------------|----------------------|----------------|----------|----------|---------------|-----------|---------------|--------------------|
| X-11429          | t0         | -0.0414  | -0.0141 | -0.0314 | 0.0334   | 0.1208*  | -0.0179          | 0.0242               | -0.0339        | 0.1450*  | 0.0063   | 0.0525        | -0.0243   | 0.0445        | 0.0176             |
|                  | t24        | 0.0073   | -0.0537 | -0.0146 | 0.0468   | 0.4011*  | 0.0351           | 0.0011               | -0.0007        | 0.0438   | -0.0268  | -0.0026       | 0.2985*   | -0.0044       | 0.0066             |
| X-11437          | t0         | 0.2327*  | -0.0463 | 0.0102  | -0.0518  | 0.0355   | -0.0349          | -0.0019              | -0.0149        | 0.0178   | -0.0223  | -0.0455       | -0.0232   | -0.046        | -0.1510*           |
|                  | t24        | 0.0084   | -0.0581 | 0.0103  | 0.0002   | 0.021    | -0.0375          | -0.0245              | 0.0146         | -0.0737  | -0.0051  | -0.0606       | -0.0207   | -0.0417       | -0.0468            |
| X-11438          | t0         | -0.0343  | 0.1397* | 0.0278  | -0.1794* | 0.0099   | 0.0028           | 0.0465               | -0.0519        | 0.01     | 0.1140*  | 0.0173        | 0.0273    | 0.0479        | -0.0444            |
|                  | t24        | -0.0695  | 0.0157  | -0.0371 | -0.0159  | 0.1586*  | 0.0407           | 0.0104               | -0.0017        | -0.0168  | -0.0749  | -0.0013       | 0.4404*   | -0.01         | 0.2476*            |
| X-11440          | t0         | -0.0205  | 0.1226* | -0.0183 | -0.0642  | 0.0347   | 0.0304           | 0.0511               | -0.0722        | -0.0624  | -0.0247  | 0.0998        | -0.0546   | -0.0053       | -0.0562            |
|                  | t24        | -0.0538  | 0.0175  | -0.0133 | -0.0101  | 0.4067*  | 0.027            | 0.0626               | 0.0028         | -0.0573  | -0.0308  | 0.0165        | 0.0351    | -0.0424       | 0.0106             |
| X-11441          | t0         | N/D      | N/D     | N/D     | N/D      | N/D      | N/D              | N/D                  | N/D            | N/D      | N/D      | N/D           | N/D       | N/D           | N/D                |
|                  | t24        | -0.0771  | 0.0011  | 0.0376  | -0.0137  | 0.0142   | 0.0029           | -0.007               | 0.0012         | 0.0156   | 0.0534   | 0.1240*       | 0.2743*   | 0.0496        | 0.2850*            |
| X-11442          | t0         | N/D      | N/D     | N/D     | N/D      | N/D      | N/D              | N/D                  | N/D            | N/D      | N/D      | N/D           | N/D       | N/D           | N/D                |
|                  | t24        | -0.0359  | -0.0038 | 0.0647  | -0.0308  | 0.017    | -0.0072          | -0.0033              | -0.0072        | 0.0056   | 0.0623   | 0.1429*       | 0.2560*   | 0.0174        | 0.1144*            |
| X-11443          | t0         | -0.0103  | 0.2505* | -0.0118 | -0.0007  | -0.0102  | 0.0671           | -0.0288              | -0.0175        | -0.0204  | -0.0164  | -0.0102       | -0.0289   | 0.2804*       | 0.0057             |
|                  | t24        | -0.057   | 0.0474  | -0.077  | -0.0024  | 0.0356   | 0.0197           | 0.1097*              | 0.0044         | -0.0866  | -0.1250* | -0.0012       | 0.0196    | 0.0073        | 0.1113*            |
| X-11444          | t0         | -0.1018* | 0.0342  | 0.0236  | -0.0328  | -0.0011  | -0.0292          | 0.0342               | -0.004         | -0.0385  | 0.0182   | -0.0208       | -0.0282   | -0.0327       | -0.0165            |
|                  | t24        | -0.0274  | -0.0324 | -0.0184 | 0.1747*  | 0.0381   | -0.0144          | -0.0071              | 0.0888         | -0.1276* | 0.0431   | -0.1100*      | -0.0673   | -0.0631       | -0.0175            |
| X-11445          | t0         | 0.0167   | 0.2135* | -0.0158 | -0.0505  | -0.006   | -0.0037          | 0                    | 0.0203         | 0.0329   | -0.0049  | -0.0038       | -0.0279   | -0.0594       | -0.0198            |
|                  | t24        | -0.0606  | 0.1461* | -0.0482 | -0.0817  | 0.0868   | 0.0342           | 0.0102               | 0.0378         | 0.0194   | -0.006   | -0.0022       | -0.0082   | -0.1105*      | -0.0049            |
| X-11450          | t0         | -0.0254  | 0.0509  | -0.0466 | -0.2189* | 0.0611   | 0.0221           | 0.081                | -0.0615        | -0.0117  | 0.0027   | 0.3862*       | -0.0385   | 0.0546        | -0.057             |
|                  | t24        | -0.0272  | 0.0199  | -0.0012 | -0.0485  | 0.1746*  | 0.0829           | 0.1987*              | -0.0365        | -0.0184  | 0.0251   | 0.2635*       | 0.0121    | 0.0447        | -0.0356            |
| X-11452          | t0         | 0.0055   | 0.0128  | 0.0901  | -0.0296  | -0.1934* | -0.0371          | 0.2402*              | 0.0046         | -0.0286  | -0.0039  | -0.0507       | 0.0036    | 0.0365        | 0.0939             |
|                  | t24        | 0.0093   | -0.0019 | 0.2699* | 0.0002   | -0.0863  | -0.0166          | 0.0741               | 0.0027         | -0.0043  | -0.0028  | -0.0654       | 0.055     | 0.0813        | 0.0039             |
| X-11469          | t0         | N/D      | N/D     | N/D     | N/D      | N/D      | N/D              | N/D                  | N/D            | N/D      | N/D      | N/D           | N/D       | N/D           | N/D                |
|                  | t24        | 0.0731   | 0.0196  | 0       | -0.0799  | -0.0245  | 0.0197           | -0.082               | 0.0063         | 0.0062   | -0.0585  | -0.0311       | -0.0435   | -0.0052       | 0.1075*            |
| X-11470          | t0         | -0.0191  | 0.0285  | -0.0259 | 0.0032   | 0.0044   | -0.0425          | 0.0135               | -0.0255        | -0.0144  | 0.1436*  | 0.0206        | -0.0386   | -0.0523       | -0.048             |
|                  | t24        | -0.1024* | -0.0063 | -0.0423 | 0.0193   | 0.0944   | -0.0191          | 0.0075               | 0.0078         | -0.0343  | 0.012    | -0.0094       | 0.091     | 0.0006        | -0.0029            |
| X-11476          | t0         | N/D      | N/D     | N/D     | N/D      | N/D      | N/D              | N/D                  | N/D            | N/D      | N/D      | N/D           | N/D       | N/D           | N/D                |
|                  | t24        | 0.0105   | -0.0904 | 0.0196  | -0.0017  | 0.0157   | 0.033            | 0.0113               | -0.067         | 0.074    | -0.0061  | 0.0465        | -0.0184   | -0.0271       | 0.0169             |
| X-11478          | t0         | -0.0577  | 0.0378  | 0.087   | -0.0585  | -0.0346  | -0.0597          | 0.1849*              | -0.0045        | 0.0142   | 0.1340*  | 0.0034        | 0.0896    | 0.0228        | -0.0064            |
|                  | t24        | -0.0132  | 0.0071  | 0.0228  | 0.0167   | -0.0297  | -0.0482          | 0.0335               | -0.008         | -0.0678  | 0.2591*  | 0.0931        | 0.2127*   | 0.0099        | 0.0096             |
| X-11483          | t0         | N/D      | N/D     | N/D     | N/D      | N/D      | N/D              | N/D                  | N/D            | N/D      | N/D      | N/D           | N/D       | N/D           | N/D                |
|                  | t24        | 0.1728*  | -0.0026 | 0.0053  | -0.0124  | -0.0446  | 0.0003           | 0.0744               | -0.0244        | 0.0196   | -0.0285  | -0.0421       | 0.0077    | 0.0335        | 0.0108             |
| X-11490          | t0         | -0.038   | 0.0124  | 0.0024  | -0.1246* | 0.1132*  | -0.0176          | 0.0215               | 0.0015         | -0.003   | -0.0132  | 0.2901*       | 0.0034    | -0.0378       | -0.0491            |
|                  | t24        | -0.0263  | -0.005  | -0.0084 | -0.0053  | 0.1886*  | 0.0994           | -0.0111              | -0.0116        | -0.0205  | -0.0364  | -0.0069       | 0.2132*   | -0.026        | 0.1977*            |
| X-11491          | t0         | -0.0044  | -0.0228 | 0.0176  | -0.0292  | 0.0813   | -0.0542          | 0.1333*              | 0.0007         | 0.0325   | -0.0444  | 0.4162*       | 0.028     | -0.0091       | 0.0319             |
|                  | t24        | -0.0023  | -0.0384 | 0.0099  | -0.0192  | 0.1396*  | -0.0194          | 0.1318*              | -0.0049        | 0.0381   | -0.0094  | 0.2852*       | 0.1283*   | 0.0179        | -0.0049            |
| X-11497          | t0         | -0.0196  | 0.0157  | -0.049  | -0.0211  | 0.0969   | -0.027           | 0.0072               | 0.0038         | -0.0142  | 0.1001*  | 0.0186        | -0.0136   | 0.0134        | 0.3330*            |
|                  | t24        | 0.2530*  | -0.0109 | -0.004  | -0.0208  | -0.0093  | -0.0369          | 0.0137               | -0.0263        | 0.0034   | -0.0347  | 0.002         | -0.0076   | 0.1241*       | 0.091              |
| X-11510          | t0         | 0.0226   | -0.0367 | 0.1401* | -0.0368  | 0.01     | 0.0146           | 0.0429               | -0.0454        | -0.0063  | 0.0391   | 0.3635*       | 0.0111    | 0.1478*       | -0.0567            |
|                  | t24        | -0.0108  | -0.0409 | 0.1703* | -0.0426  | 0.0372   | 0.036            | 0.1209*              | -0.0322        | -0.0069  | 0.1592*  | 0.1451*       | 0.0682    | 0.0928        | -0.0312            |
| X-11513          | t0         | N/D      | N/D     | N/D     | N/D      | N/D      | N/D              | N/D                  | N/D            | N/D      | N/D      | N/D           | N/D       | N/D           | N/D                |
|                  | t24        | 0.0057   | 0.0078  | -0.0351 | 0.0453   | -0.0767  | 0.0214           | 0.0856               | -0.0111        | -0.1410* | -0.0798  | -0.0293       | 0.1171*   | 0.1092*       | 0.02               |
| X-11521          | t0         | -0.0042  | -0.0137 | 0.3022* | -0.0066  | 0.0068   | 0.0895           | -0.0428              | -0.0005        | 0.0566   | -0.0588  | -0.0081       | -0.0486   | -0.0178       | -0.0243            |
|                  | t24        | -0.0163  | -0.0108 | 0.0045  | -0.0192  | 0.0988   | -0.0133          | -0.0226              | -0.0133        | -0.0631  | 0.0261   | -0.0145       | 0.0136    | -0.0038       | -0.0175            |
| X-11522          | t0         | N/D      | N/D     | N/D     | N/D      | N/D      | N/D              | N/D                  | N/D            | N/D      | N/D      | N/D           | N/D       | N/D           | N/D                |
|                  | t24        | -0.0258  | -0.0089 | 0.0482  | -0.0294  | 0.1590*  | 0.0101           | 0.014                | -0.0001        | -0.0038  | 0.0024   | 0.2379*       | 0.3637*   | 0.0129        | 0.1865*            |
| X-11529          | t0         | -0.0441  | 0.083   | -0.0223 | -0.0602  | 0.0569   | -0.0575          | 0.0019               | 0.0092         | -0.0255  | -0.0411  | 0.2088*       | 0.0333    | -0.029        | -0.0201            |
|                  | t24        | -0.0557  | 0.0845  | -0.0349 | -0.0539  | 0.0776   | 0.0088           | -0.0265              | -0.0061        | -0.0077  | -0.0829  | 0.051         | 0.1464*   | -0.01         | -0.0252            |
| X-11530          | t0         | N/D      | N/D     | N/D     | N/D      | N/D      | N/D              | N/D                  | N/D            | N/D      | N/D      | N/D           | N/D       | N/D           | N/D                |
|                  | t24        | -0.0394  | -0.0273 | 0.0515  | -0.0709  | 0.0682   | 0.0276           | 0.0193               | -0.0097        | -0.0155  | 0.0057   | 0.1760*       | 0.3381*   | 0.0067        | 0.1873*            |

| Biochemical Name | Time Point | SIRS    | UCS      | SS      | Sshock   | SNS     | <i>S. aureus</i> | <i>S. pneumoniae</i> | <i>E. coli</i> | Gender   | Race     | Liver Disease | Hepatitis | Alcohol Abuse | Neoplastic Disease |
|------------------|------------|---------|----------|---------|----------|---------|------------------|----------------------|----------------|----------|----------|---------------|-----------|---------------|--------------------|
| X-11533          | t0         | N/D     | N/D      | N/D     | N/D      | N/D     | N/D              | N/D                  | N/D            | N/D      | N/D      | N/D           | N/D       | N/D           | N/D                |
|                  | t24        | 0.0159  | -0.3289* | -0.0023 | -0.0008  | 0.0714  | 0.0247           | 0.0282               | -0.0026        | -0.0095  | -0.3304* | 0.0039        | 0.031     | -0.0434       | 0.0042             |
| X-11538          | t0         | -0.0243 | -0.0117  | -0.0233 | -0.0043  | 0.1553* | -0.0261          | 0.0395               | -0.0129        | 0.0332   | -0.0102  | 0.3920*       | -0.0084   | -0.0097       | -0.0231            |
|                  | t24        | -0.0257 | -0.0244  | -0.0289 | 0.0291   | 0.066   | 0.015            | 0.085                | -0.0181        | 0.1079*  | 0.0025   | 0.2520*       | 0.0549    | -0.041        | -0.0175            |
| X-11542          | t0         | N/D     | N/D      | N/D     | N/D      | N/D     | N/D              | N/D                  | N/D            | N/D      | N/D      | N/D           | N/D       | N/D           | N/D                |
|                  | t24        | -0.0341 | 0.002    | 0.0929  | -0.0197  | 0.0174  | -0.0155          | 0.0383               | -0.2982*       | -0.0036  | 0.0197   | 0.031         | -0.0117   | -0.0741       | 0.0124             |
| X-11546          | t0         | 0.0006  | -0.0051  | 0.1343* | -0.0194  | -0.0127 | 0.1749*          | -0.018               | -0.0117        | 0.0155   | 0.2388*  | 0.2948*       | -0.005    | 0.0008        | -0.0096            |
|                  | t24        | -0.004  | -0.0215  | 0.0987  | 0.0214   | -0.0539 | 0.1555*          | -0.0264              | 0.0746         | 0.1416*  | 0.0316   | -0.0067       | 0.009     | 0.1275*       | -0.0347            |
| X-11550          | t0         | 0.0279  | 0.0248   | 0.0418  | -0.0605  | -0.0486 | -0.0665          | 0.0095               | -0.009         | -0.0349  | 0.003    | 0.0623        | 0.0174    | 0.0521        | 0.1234*            |
|                  | t24        | 0.1250* | -0.05    | -0.0053 | -0.0236  | 0.0224  | -0.0378          | 0.0819               | -0.0257        | 0.052    | -0.0826  | 0.1916*       | -0.0131   | -0.0015       | -0.0045            |
| X-11564          | t0         | N/D     | N/D      | N/D     | N/D      | N/D     | N/D              | N/D                  | N/D            | N/D      | N/D      | N/D           | N/D       | N/D           | N/D                |
|                  | t24        | -0.0288 | -0.1028* | 0.1778* | -0.0273  | 0.1809* | 0.0458           | 0.0003               | 0.0096         | -0.0021  | 0.2052*  | 0.0083        | 0.1185*   | 0.04          | 0.0853             |
| X-11593          | t0         | -0.0362 | -0.0375  | 0.0492  | 0.0242   | 0.0472  | -0.0207          | -0.0464              | -0.0355        | -0.012   | -0.0038  | 0.0336        | -0.0167   | -0.0767       | 0.0056             |
|                  | t24        | -0.0194 | -0.0846  | -0.0136 | 0.0307   | 0.0616  | -0.0136          | -0.02                | 0.0032         | -0.0288  | -0.0611  | -0.0271       | 0.0335    | -0.0299       | -0.008             |
| X-11687          | t0         | -0.0327 | -0.01    | -0.018  | 0.04     | 0.0282  | -0.0185          | -0.0021              | 0.0286         | -0.0009  | -0.0158  | 0.0112        | -0.0005   | 0.0085        | -0.0618            |
|                  | t24        | -0.0238 | -0.044   | -0.0078 | 0.0236   | 0.2658* | 0.0758           | -0.0057              | 0.0018         | -0.0091  | -0.0194  | 0.0018        | 0.1702*   | -0.0239       | 0.1405*            |
| X-11727          | t0         | 0.1284* | 0.0308   | 0.0323  | -0.0965  | -0.0873 | -0.0423          | 0.0235               | 0.0129         | 0.0415   | -0.002   | 0.013         | -0.0378   | -0.0295       | 0.0052             |
|                  | t24        | -0.019  | 0.0381   | 0.0028  | -0.0644  | 0.0434  | 0.0344           | 0.0202               | -0.0547        | -0.0042  | 0.0101   | -0.064        | -0.0517   | -0.0333       | 0.0112             |
| X-11786          | t0         | 0.1455* | -0.0161  | -0.0338 | -0.0131  | 0.0171  | -0.0499          | 0.0017               | 0.0097         | 0.2512*  | 0.0167   | 0.0325        | 0.031     | 0.2391*       | 0.0741             |
|                  | t24        | 0.0429  | -0.0296  | 0.0058  | 0        | -0.0075 | -0.0289          | -0.0208              | 0.0032         | 0.3763*  | 0.0085   | -0.0181       | 0.2111*   | 0.0945        | 0.2349*            |
| X-11787          | t0         | -0.0293 | -0.0357  | 0.1142* | 0.0057   | 0.0281  | -0.0466          | -0.0431              | -0.0315        | -0.0164  | -0.0021  | -0.0176       | -0.011    | -0.0349       | -0.0032            |
|                  | t24        | -0.0217 | 0.0027   | 0.0047  | -0.043   | 0.0403  | -0.0093          | -0.0429              | -0.0205        | -0.0376  | -0.0202  | -0.3263*      | -0.0205   | -0.014        | 0.0016             |
| X-11793          | t0         | -0.0217 | 0.0425   | 0.2084* | -0.0929  | -0.0149 | 0.0044           | 0.0298               | -0.0065        | -0.0432  | 0.2211*  | 0.1405*       | 0.0446    | 0.038         | -0.0178            |
|                  | t24        | -0.0227 | -0.0062  | 0.0564  | 0.011    | -0.0534 | -0.0076          | 0.0473               | -0.0487        | -0.0657  | 0.4580*  | 0.1108*       | 0.0215    | 0.0034        | 0.004              |
| X-11795          | t0         | 0.0003  | -0.0066  | -0.0024 | -0.0245  | 0.0664  | -0.0069          | 0.0708               | -0.0209        | 0.1240*  | -0.0218  | 0.2459*       | 0.0371    | 0.0287        | -0.02              |
|                  | t24        | 0.028   | -0.0472  | -0.0228 | -0.0212  | 0.0429  | -0.0395          | 0.0556               | -0.0234        | 0.1580*  | -0.0161  | 0.2025*       | 0.0629    | 0.0681        | -0.0257            |
| X-11799          | t0         | N/D     | N/D      | N/D     | N/D      | N/D     | N/D              | N/D                  | N/D            | N/D      | N/D      | N/D           | N/D       | N/D           | N/D                |
|                  | t24        | 0.0152  | 0.0072   | -0.0267 | 0.0551   | -0.0408 | 0.0259           | 0.027                | 0.0166         | -0.0594  | -0.0634  | 0.01          | 0.1552*   | 0.1859*       | 0.0085             |
| X-11809          | t0         | -0.0023 | 0.0488   | 0.054   | -0.0178  | -0.0276 | 0.0283           | -0.0121              | 0.0192         | -0.1716* | 0.0299   | 0.2405*       | 0.0263    | 0.1494*       | -0.0082            |
|                  | t24        | -0.0198 | -0.011   | 0.3879* | 0.0045   | 0.0044  | 0.001            | 0.0339               | -0.0036        | -0.0151  | -0.0425  | -0.0171       | -0.0137   | -0.038        | -0.0225            |
| X-11818          | t0         | N/D     | N/D      | N/D     | N/D      | N/D     | N/D              | N/D                  | N/D            | N/D      | N/D      | N/D           | N/D       | N/D           | N/D                |
|                  | t24        | 0.1307* | -0.0861  | -0.0255 | 0.0071   | 0.0073  | -0.0407          | -0.0228              | 0.038          | 0.001    | -0.0198  | -0.0427       | -0.0109   | 0.0108        | 0.1682*            |
| X-11826          | t0         | -0.0315 | 0.0044   | -0.0315 | 0.0178   | 0.0207  | -0.0361          | 0.0074               | 0.0108         | -0.0011  | -0.0293  | -0.0258       | 0.0275    | 0.0297        | -0.016             |
|                  | t24        | 0.0056  | 0.0131   | -0.0262 | 0.0324   | -0.0238 | -0.0727          | 0.0114               | 0.0654         | -0.0265  | -0.0598  | -0.0323       | 0.0644    | 0.0196        | 0.0134             |
| X-11832          | t0         | N/D     | N/D      | N/D     | N/D      | N/D     | N/D              | N/D                  | N/D            | N/D      | N/D      | N/D           | N/D       | N/D           | N/D                |
|                  | t24        | -0.0272 | -0.0108  | -0.0185 | 0.035    | 0.0354  | -0.0173          | 0.0382               | -0.0127        | -0.0432  | -0.0181  | 0.0123        | -0.0398   | -0.0025       | -0.0334            |
| X-11838          | t0         | -0.0243 | -0.0227  | 0.1751* | 0.017    | 0.0023  | 0.1002*          | -0.044               | -0.0035        | 0.084    | 0.0591   | -0.053        | 0.0361    | 0.0066        | -0.0045            |
|                  | t24        | -0.0335 | 0.0415   | -0.0253 | 0.0232   | -0.0148 | 0.1016*          | -0.02                | 0.0191         | 0.0305   | -0.1011* | -0.0417       | 0.1105*   | 0.0166        | 0.0075             |
| X-11843          | t0         | -0.0026 | 0.0063   | -0.009  | -0.0018  | -0.0004 | -0.0332          | 0.0391               | -0.0012        | -0.0154  | -0.1290* | -0.0275       | -0.042    | -0.1863*      | 0.0557             |
|                  | t24        | 0.0166  | -0.0079  | -0.0257 | -0.0245  | 0.0763  | -0.0389          | -0.0005              | 0.0074         | -0.0447  | -0.0659  | -0.0213       | -0.0118   | -0.1649*      | 0.0247             |
| X-11850          | t0         | -0.0183 | -0.0102  | 0.0091  | -0.0063  | 0.0234  | -0.0254          | 0.085                | 0.006          | -0.0308  | -0.1022* | -0.0303       | -0.0176   | -0.0921       | 0.0259             |
|                  | t24        | 0.0008  | -0.0074  | -0.0322 | -0.0154  | 0.1100* | -0.0074          | 0.0184               | 0.0064         | -0.0509  | -0.0811  | -0.0235       | 0.004     | -0.0881       | 0.0474             |
| X-11853          | t0         | -0.0028 | 0.0303   | 0.0268  | -0.0945  | 0.0169  | -0.0281          | -0.0398              | 0.0243         | 0.0563   | 0.0286   | -0.0107       | 0.0165    | -0.0096       | -0.0032            |
|                  | t24        | 0.02    | -0.1996* | -0.0141 | 0.0658   | 0.0089  | 0.0285           | 0.0462               | -0.0237        | 0.0594   | -0.0094  | 0.0109        | -0.0254   | -0.0333       | -0.0335            |
| X-11859          | t0         | 0.0299  | 0.0368   | -0.0086 | -0.1597* | -0.0061 | -0.0184          | 0.0039               | -0.0384        | -0.0168  | 0.0119   | -0.0069       | 0.012     | -0.0392       | 0.2129*            |
|                  | t24        | 0.2359* | -0.1606* | 0.0407  | -0.0032  | -0.0004 | -0.0161          | 0.0691               | -0.0614        | 0.0047   | -0.0431  | -0.0014       | -0.0947   | 0.0072        | 0.001              |
| X-11861          | t0         | N/D     | N/D      | N/D     | N/D      | N/D     | N/D              | N/D                  | N/D            | N/D      | N/D      | N/D           | N/D       | N/D           | N/D                |
|                  | t24        | 0.3096* | -0.0565  | -0.0243 | 0.0115   | -0.0036 | -0.0345          | -0.0173              | -0.0001        | 0.0036   | 0.0146   | -0.0427       | 0.0428    | 0.0101        | -0.0422            |
| X-11868          | t0         | N/D     | N/D      | N/D     | N/D      | N/D     | N/D              | N/D                  | N/D            | N/D      | N/D      | N/D           | N/D       | N/D           | N/D                |
|                  | t24        | 0.0142  | 0.0065   | -0.0066 | -0.0252  | 0.0031  | -0.0436          | -0.0421              | -0.0276        | 0.01     | -0.0219  | -0.0016       | 0.0271    | -0.007        | -0.0482            |



| Biochemical Name | Time Point | SIRS    | UCS      | SS       | Sshock  | SNS     | <i>S. aureus</i> | <i>S. pneumoniae</i> | <i>E. coli</i> | Gender  | Race    | Liver Disease | Hepatitis | Alcohol Abuse | Neoplastic Disease |
|------------------|------------|---------|----------|----------|---------|---------|------------------|----------------------|----------------|---------|---------|---------------|-----------|---------------|--------------------|
| X-12442          | t0         | 0.0254  | -0.0216  | 0.1078*  | -0.0295 | -0.0071 | -0.0523          | 0.0999               | -0.0148        | -0.0287 | 0.0237  | 0.1424*       | -0.0108   | 0.0074        | -0.0036            |
|                  | t24        | -0.0726 | -0.0739  | 0.0364   | -0.0058 | 0.0705  | 0.0581           | 0.0357               | -0.01          | -0.0334 | 0.0441  | -0.0102       | 0.0979    | -0.0206       | 0.1450*            |
| X-12443          | t0         | N/D     | N/D      | N/D      | N/D     | N/D     | N/D              | N/D                  | N/D            | N/D     | N/D     | N/D           | N/D       | N/D           | N/D                |
|                  | t24        | -0.0167 | 0.0032   | -0.0328  | 0.0441  | -0.0181 | -0.063           | -0.04                | -0.0307        | -0.0132 | 0.2326* | -0.0276       | -0.0447   | -0.0354       | 0.0062             |
| X-12450          | t0         | 0.0101  | -0.0082  | 0.057    | -0.0132 | -0.0082 | -0.0458          | -0.0028              | -0.0059        | -0.0345 | -0.0018 | 0.0147        | -0.0273   | -0.0313       | -0.0193            |
|                  | t24        | N/D     | N/D      | N/D      | N/D     | N/D     | N/D              | N/D                  | N/D            | N/D     | N/D     | N/D           | N/D       | N/D           | N/D                |
| X-12458          | t0         | -0.0537 | -0.1004* | -0.0041  | 0.035   | 0.0884  | 0.0103           | -0.0149              | -0.0374        | 0.0014  | -0.0216 | -0.1112*      | -0.052    | -0.0017       | 0.0028             |
|                  | t24        | 0.0069  | 0.0498   | -0.1057* | -0.0066 | 0.0063  | -0.0086          | 0.0264               | -0.0117        | 0.071   | 0.0162  | -0.0606       | -0.0154   | -0.2265*      | -0.0284            |
| X-12465          | t0         | 0.0135  | -0.0414  | 0.0206   | -0.0451 | 0.1122* | 0.0005           | -0.0201              | -0.01          | 0.0229  | -0.0003 | 0.0357        | -0.0199   | 0.0416        | -0.0199            |
|                  | t24        | -0.0272 | -0.0844  | 0.0168   | -0.0035 | 0.0486  | 0.042            | -0.0345              | 0.0676         | -0.0019 | 0.0022  | 0.0249        | 0.0104    | -0.059        | 0.0163             |
| X-12510          | t0         | 0.0378  | -0.0029  | 0.0466   | -0.0113 | -0.0535 | -0.0198          | 0.0311               | 0.0123         | 0.0002  | 0.0073  | 0.007         | 0.0111    | 0.3120*       | 0.3622*            |
|                  | t24        | 0.0677  | -0.0087  | 0.0128   | 0.0048  | -0.0462 | -0.0007          | 0.0281               | 0.0177         | -0.007  | 0.0246  | 0.0025        | 0.0248    | 0.1135*       | 0.3452*            |
| X-12644          | t0         | 0.0232  | 0.0028   | -0.0612  | 0.0182  | 0.0113  | -0.0526          | 0.01                 | 0.0138         | 0.0309  | -0.0475 | 0.007         | -0.0317   | -0.0477       | 0.3000*            |
|                  | t24        | 0.4403* | 0.0062   | 0.0131   | 0.0125  | -0.0673 | -0.0369          | 0.0377               | 0.029          | 0.0222  | -0.0512 | 0.0319        | -0.0144   | -0.0145       | 0.004              |
| X-12660          | t0         | 0.0301  | -0.0086  | 0.2867*  | -0.0034 | -0.0857 | 0.0553           | -0.073               | 0.0242         | 0.0013  | -0.0009 | 0.2625*       | -0.0135   | 0.0311        | -0.022             |
|                  | t24        | -0.0012 | -0.0379  | -0.0076  | 0.0367  | 0.0004  | 0.0063           | -0.0142              | 0.0451         | 0.0257  | -0.0818 | -0.0517       | -0.0186   | -0.0468       | -0.0176            |
| X-12688          | t0         | 0.0007  | -0.0439  | 0.0392   | 0.0345  | -0.0248 | 0.0576           | 0.0674               | -0.0417        | 0.0198  | 0.0495  | 0.0236        | 0.2334*   | 0.0373        | -0.0095            |
|                  | t24        | -0.0357 | -0.0201  | -0.0122  | 0.0052  | 0.1042* | 0.2659*          | -0.0035              | -0.0088        | -0.0257 | -0.0027 | 0.0035        | 0.1634*   | -0.0066       | 0.1425*            |
| X-12690          | t0         | -0.0532 | -0.0258  | -0.0183  | 0.0024  | 0.0819  | -0.0342          | -0.0147              | -0.0013        | 0.2112* | 0.0546  | 0.0152        | -0.0286   | 0.0783        | 0.1900*            |
|                  | t24        | N/D     | N/D      | N/D      | N/D     | N/D     | N/D              | N/D                  | N/D            | N/D     | N/D     | N/D           | N/D       | N/D           | N/D                |
| X-12695          | t0         | 0.0055  | -0.0447  | 0.0045   | 0.0226  | 0.0061  | -0.0643          | 0.3394*              | 0.0472         | -0.0092 | 0.0155  | 0.1042*       | 0.1750*   | 0.1185*       | -0.1365*           |
|                  | t24        | 0.0094  | -0.0541  | -0.0081  | -0.0063 | 0.0593  | -0.0108          | 0.1768*              | -0.0078        | 0.0091  | 0.0161  | 0.0155        | 0.4296*   | 0.0811        | 0.0035             |
| X-12707          | t0         | -0.0108 | -0.0443  | -0.017   | 0.0156  | 0.3911* | -0.028           | 0.1316*              | -0.0011        | 0.0129  | -0.0336 | -0.0326       | -0.0054   | -0.0036       | -0.0447            |
|                  | t24        | N/D     | N/D      | N/D      | N/D     | N/D     | N/D              | N/D                  | N/D            | N/D     | N/D     | N/D           | N/D       | N/D           | N/D                |
| X-12742          | t0         | -0.0109 | -0.0094  | -0.0239  | -0.0233 | 0.07    | -0.0081          | 0.1797*              | 0.0021         | -0.0147 | 0.0089  | 0.0318        | 0.0026    | -0.08         | -0.0334            |
|                  | t24        | -0.0248 | -0.0477  | -0.0106  | -0.0186 | 0.1621* | 0.0475           | 0.023                | -0.0055        | 0       | -0.0128 | -0.0255       | 0.2292*   | -0.0245       | 0.1448*            |
| X-12749          | t0         | -0.0322 | -0.0363  | -0.0292  | 0.0585  | 0.0754  | 0.0066           | -0.0433              | -0.0035        | -0.0073 | 0.0233  | -0.0069       | 0.0083    | -0.0131       | -0.0352            |
|                  | t24        | 0.002   | -0.0608  | -0.007   | 0.0137  | 0.0145  | 0.0291           | -0.0699              | -0.0084        | -0.0161 | 0.1959* | 0             | 0.0044    | -0.0387       | -0.0261            |
| X-12756          | t0         | N/D     | N/D      | N/D      | N/D     | N/D     | N/D              | N/D                  | N/D            | N/D     | N/D     | N/D           | N/D       | N/D           | N/D                |
|                  | t24        | -0.0663 | 0.082    | -0.0216  | -0.0219 | 0.0278  | 0.3286*          | -0.0094              | 0.0043         | -0.0737 | -0.075  | -0.0315       | 0.0428    | -0.0204       | -0.0135            |
| X-12775          | t0         | 0.0073  | -0.011   | -0.0136  | -0.0345 | 0.0777  | -0.0187          | -0.021               | -0.0151        | -0.0397 | -0.0153 | 0.0105        | -0.0605   | 0.0161        | -0.0507            |
|                  | t24        | -0.0782 | -0.0658  | 0.0144   | -0.0087 | 0.2129* | -0.0822          | 0.0682               | 0.0322         | 0.0158  | -0.0057 | 0.0065        | -0.0285   | -0.0169       | 0.0069             |
| X-12776          | t0         | -0.0817 | 0.0001   | 0.0614   | 0.0076  | -0.0165 | 0.047            | 0.0127               | -0.0041        | 0.0216  | -0.0117 | 0.0338        | 0.0047    | -0.0046       | 0.0104             |
|                  | t24        | N/D     | N/D      | N/D      | N/D     | N/D     | N/D              | N/D                  | N/D            | N/D     | N/D     | N/D           | N/D       | N/D           | N/D                |
| X-12792          | t0         | N/D     | N/D      | N/D      | N/D     | N/D     | N/D              | N/D                  | N/D            | N/D     | N/D     | N/D           | N/D       | N/D           | N/D                |
|                  | t24        | -0.0017 | -0.019   | 0.0695   | -0.0373 | 0.0146  | 0.0791           | -0.074               | 0.0272         | -0.0059 | -0.009  | -0.0508       | 0.0105    | -0.0196       | -0.0664            |
| X-12794          | t0         | -0.0182 | -0.0001  | 0.006    | -0.0091 | 0.0384  | 0.1175*          | 0.0254               | -0.0265        | -0.0278 | -0.0036 | -0.0288       | -0.0091   | -0.0104       | -0.0472            |
|                  | t24        | -0.0216 | 0.0297   | -0.0323  | -0.0274 | 0.2885* | 0.2044*          | 0.004                | 0.0221         | -0.0371 | -0.0195 | -0.0589       | 0.0763    | -0.04         | 0.0059             |
| X-12802          | t0         | -0.0162 | -0.027   | 0.044    | -0.0411 | 0.1840* | 0.0129           | -0.0282              | -0.0103        | 0.0157  | 0.0186  | 0.0072        | 0.0195    | -0.0251       | -0.0581            |
|                  | t24        | -0.0023 | -0.0167  | -0.0114  | 0.0013  | 0.3719* | -0.006           | -0.0213              | -0.0137        | 0.0005  | -0.0068 | 0.0016        | 0.0093    | -0.0346       | -0.0455            |
| X-12822          | t0         | N/D     | N/D      | N/D      | N/D     | N/D     | N/D              | N/D                  | N/D            | N/D     | N/D     | N/D           | N/D       | N/D           | N/D                |
|                  | t24        | -0.0069 | -0.074   | -0.0095  | 0.0386  | 0.2760* | 0.1238*          | 0.0155               | 0.0008         | -0.0065 | -0.0609 | -0.063        | 0.2763*   | -0.008        | 0.0354             |
| X-12844          | t0         | -0.0392 | 0.0057   | 0.0246   | -0.022  | 0.0408  | -0.0074          | 0.0289               | -0.0688        | -0.0143 | 0.0795  | -0.0582       | -0.3398*  | -0.0018       | 0.0284             |
|                  | t24        | -0.0304 | -0.0525  | -0.0375  | 0.097   | 0.0812  | -0.0098          | 0.0067               | 0.1256*        | -0.0838 | -0.0029 | -0.1137*      | -0.1198*  | -0.073        | -0.0275            |
| X-12846          | t0         | N/D     | N/D      | N/D      | N/D     | N/D     | N/D              | N/D                  | N/D            | N/D     | N/D     | N/D           | N/D       | N/D           | N/D                |
|                  | t24        | 0.0015  | -0.0465  | -0.0246  | 0.0069  | 0.3564* | 0.0514           | 0.0063               | -0.0165        | -0.0678 | -0.0705 | -0.0348       | -0.0026   | -0.0449       | 0.0367             |
| X-12849          | t0         | -0.0012 | 0.1003*  | -0.0153  | -0.0656 | 0.0024  | 0.0227           | 0.0388               | -0.0987        | -0.0476 | -0.0016 | -0.0008       | -0.0136   | 0.0803        | -0.1542*           |
|                  | t24        | N/D     | N/D      | N/D      | N/D     | N/D     | N/D              | N/D                  | N/D            | N/D     | N/D     | N/D           | N/D       | N/D           | N/D                |
| X-12850          | t0         | -0.0033 | 0.0023   | -0.0005  | -0.0415 | 0.0698  | -0.0175          | 0.0808               | -0.0061        | 0.0221  | -0.0418 | 0.4549*       | 0.0215    | 0.0046        | -0.018             |
|                  | t24        | -0.0045 | -0.0138  | -0.0056  | -0.0395 | 0.1486* | -0.002           | 0.0923               | -0.0114        | 0.0359  | -0.0306 | 0.1717*       | 0.3157*   | 0.062         | 0.0203             |



| Biochemical Name | Time Point | SIRS     | UCS      | SS       | Sshock   | SNS     | <i>S. aureus</i> | <i>S. pneumoniae</i> | <i>E. coli</i> | Gender  | Race    | Liver Disease | Hepatitis | Alcohol Abuse | Neoplastic Disease |
|------------------|------------|----------|----------|----------|----------|---------|------------------|----------------------|----------------|---------|---------|---------------|-----------|---------------|--------------------|
| X-12851          | t0         | N/D      | N/D      | N/D      | N/D      | N/D     | N/D              | N/D                  | N/D            | N/D     | N/D     | N/D           | N/D       | N/D           | N/D                |
|                  | t24        | -0.0134  | -0.0563  | -0.0585  | 0.0812   | 0.1560* | 0.2091*          | 0.0298               | -0.0142        | -0.0394 | -0.0415 | -0.051        | 0.1374*   | 0.0249        | 0.0006             |
| X-12855          | t0         | -0.0077  | -0.1041* | 0.0277   | -0.0149  | 0.1238* | 0.0053           | -0.0639              | 0.0001         | 0.0024  | 0.0287  | 0.0049        | -0.0001   | 0.0026        | -0.0345            |
|                  | t24        | -0.0322  | -0.0404  | -0.0116  | 0.0351   | 0.2976* | 0.0415           | -0.019               | 0.0062         | 0.0017  | -0.0623 | -0.0129       | 0.1995*   | -0.0181       | 0.0178             |
| X-12860          | t0         | -0.0162  | -0.025   | 0.2472*  | -0.0491  | 0.1470* | -0.0089          | 0.0118               | -0.0255        | -0.0232 | 0.0839  | 0.0085        | 0.0456    | 0.008         | -0.0803            |
|                  | t24        | -0.0231  | -0.0689  | 0.016    | -0.0244  | 0.1449* | 0.0273           | -0.0014              | -0.0132        | -0.0248 | 0.0174  | -0.0178       | 0.4103*   | -0.0058       | 0.0639             |
| X-12990          | t0         | 0.0037   | -0.1061* | 0.0397   | -0.0236  | 0.0906  | -0.0891          | 0.0506               | 0.0018         | 0.0298  | -0.0189 | 0.0028        | -0.0129   | -0.0092       | 0.001              |
|                  | t24        | 0.0367   | -0.4071* | 0.0599   | -0.0165  | -0.017  | 0.0009           | 0.3869*              | 0.1480*        | 0.0176  | -0.0677 | -0.0763       | 0.0035    | -0.0418       | 0.002              |
| X-13429          | t0         | -0.0232  | 0.2793*  | -0.0265  | 0.014    | -0.0147 | -0.0228          | -0.0015              | 0.0495         | -0.0829 | -0.0015 | 0.0172        | -0.0244   | -0.022        | -0.0192            |
|                  | t24        | -0.0282  | 0.1904*  | -0.0742  | -0.0133  | 0.0223  | 0.1441*          | -0.0429              | -0.024         | -0.0418 | -0.0549 | -0.0155       | 0.4778*   | -0.0962       | 0.0398             |
| X-13435          | t0         | -0.0191  | -0.0185  | 0.0065   | -0.0154  | 0.0981  | 0.0156           | 0.0554               | -0.0591        | -0.0047 | 0.016   | -0.036        | 0.0194    | -0.0095       | -0.0215            |
|                  | t24        | N/D      | N/D      | N/D      | N/D      | N/D     | N/D              | N/D                  | N/D            | N/D     | N/D     | N/D           | N/D       | N/D           | N/D                |
| X-13465          | t0         | N/D      | N/D      | N/D      | N/D      | N/D     | N/D              | N/D                  | N/D            | N/D     | N/D     | N/D           | N/D       | N/D           | N/D                |
|                  | t24        | -0.0015  | -0.1054* | -0.1098* | 0.0278   | 0.0918  | -0.004           | 0.0287               | 0.0264         | -0.0257 | -0.0175 | -0.1346*      | -0.0002   | -0.1122*      | -0.0221            |
| X-13553          | t0         | -0.0078  | -0.2546* | -0.0341  | 0.051    | 0.0748  | -0.0122          | 0.3319*              | 0.0094         | -0.0233 | -0.0119 | -0.0334       | 0.0257    | 0.0416        | -0.0579            |
|                  | t24        | -0.0179  | -0.0902  | -0.0059  | 0.0349   | 0.3281* | 0.0051           | 0.1188*              | 0.0039         | -0.0056 | -0.0033 | -0.0205       | 0.0307    | -0.0137       | -0.0257            |
| X-13727          | t0         | N/D      | N/D      | N/D      | N/D      | N/D     | N/D              | N/D                  | N/D            | N/D     | N/D     | N/D           | N/D       | N/D           | N/D                |
|                  | t24        | -0.0322  | -0.0078  | -0.0358  | 0.0349   | 0.0494  | 0.1137*          | -0.0385              | -0.0181        | -0.0292 | 0.0073  | -0.0232       | 0.0718    | -0.0286       | 0.1615*            |
| X-14588          | t0         | -0.0307  | 0.0164   | 0.0209   | -0.1195* | 0.0565  | -0.0043          | -0.0287              | 0.0578         | -0.0338 | 0.0029  | -0.0635       | 0.0125    | -0.038        | -0.0239            |
|                  | t24        | -0.1787* | -0.3694* | 0.0486   | 0.0615   | 0.1187* | 0.0084           | 0.0626               | -0.0432        | -0.0104 | 0.0078  | -0.0032       | -0.0128   | -0.0051       | 0.0039             |
| X-14625          | t0         | N/D      | N/D      | N/D      | N/D      | N/D     | N/D              | N/D                  | N/D            | N/D     | N/D     | N/D           | N/D       | N/D           | N/D                |
|                  | t24        | 0.0548   | 0.0766   | -0.0052  | -0.0394  | -0.0399 | 0.0087           | 0.0072               | -0.0629        | 0.0282  | 0.0144  | -0.0166       | 0.1177*   | 0.0228        | -0.0261            |
| X-14626          | t0         | -0.0115  | 0.2666*  | -0.0124  | -0.0062  | -0.0062 | -0.0118          | 0.0013               | 0.0039         | -0.0775 | 0.0085  | 0.0052        | -0.0197   | -0.0673       | -0.0125            |
|                  | t24        | -0.0221  | 0.1958*  | -0.0574  | 0.0186   | 0.0105  | 0.0435           | -0.0236              | 0.0027         | -0.043  | -0.0236 | -0.0162       | 0.0941    | -0.0758       | 0.0187             |
| X-14658          | t0         | -0.0058  | -0.0088  | -0.0074  | -0.0485  | 0.1595* | -0.0328          | 0.0601               | -0.0187        | 0.0434  | -0.0236 | 0.3786*       | 0.021     | -0.0076       | -0.0109            |
|                  | t24        | -0.0161  | -0.0247  | 0.0138   | -0.0219  | 0.2587* | -0.0099          | 0.0205               | -0.0144        | -0.0053 | -0.0019 | 0.0537        | 0.1099*   | 0.0063        | 0.0039             |
| X-14662          | t0         | -0.0061  | -0.0369  | 0.0158   | 0.0128   | 0.0221  | 0.0429           | 0.0181               | -0.0131        | 0.0152  | 0.0357  | 0.3348*       | 0.1185*   | 0.0166        | -0.0549            |
|                  | t24        | 0.0409   | -0.0236  | -0.012   | -0.0049  | 0.0053  | 0.0281           | -0.0054              | -0.013         | 0.1835* | 0.0044  | 0.0288        | 0.4395*   | 0.1154*       | -0.0102            |
| X-14663          | t0         | -0.0096  | -0.017   | -0.0003  | -0.0245  | 0.0903  | 0.0148           | 0.0389               | -0.0164        | 0.058   | -0.0006 | 0.4989*       | 0.0331    | -0.0051       | -0.0273            |
|                  | t24        | 0.011    | -0.0222  | -0.0183  | -0.0154  | 0.1212* | -0.0033          | 0.0368               | -0.0216        | 0.1934* | -0.0116 | 0.3623*       | 0.1839*   | 0.0014        | -0.0208            |

SIRS - systemic inflammatory response; UCS - uncomplicated sepsis; SS - severe sepsis; SShock - septic shock; SNS - sepsis nonsurvivor

**Table S5. Normalized factor scores of Bayesian factor analysis for poor renal function (eGFR 32-74 ml/min). Sepsis outcomes [SIRS+, uncomplicated sepsis (UCS), sepsis survivor (SS), septic shock (SS) and sepsis nonsurvivor (SNS)], etiologic agents and clinical parameters were fit to a normal distribution with mean of 0 and standard deviation of 1. Poor renal function (eGFR 32-74 mL/min) at t0 (n = 56) and t24 and t24 (n = 53). Individual metabolite factor score  $\geq 0.1$  or  $\leq -0.1$  was considered significant (designated by \*).**

| Biochemical Name         | Time Point | SIRS    | UCS      | SS       | SShock   | SNS     | <i>S. aureus</i> | <i>S. pneumonia</i> | <i>E. coli</i> | Gender   | Race     | Liver Disease | Hepatitis | Alcohol Abuse | Neoplastic Disease |
|--------------------------|------------|---------|----------|----------|----------|---------|------------------|---------------------|----------------|----------|----------|---------------|-----------|---------------|--------------------|
| glycine                  | t0         | 0.0888  | -0.0248  | -0.0026  | -0.0471  | 0.0177  | -0.0156          | -0.0143             | 0.0001         | 0.0085   | 0.1350*  | 0.0487        | -0.0088   | 0.0394        | -0.01              |
|                          | t24        | 0.1865* | -0.0088  | -0.0283  | -0.1325* | 0.0212  | 0.0086           | -0.0442             | 0.0386         | 0.1542*  | 0.0342   | 0.0286        | -0.0295   | -0.0209       | -0.2051*           |
| N-acetylglycine          | t0         | 0.0088  | -0.008   | -0.0202  | -0.0047  | 0.2551* | 0.0004           | -0.0095             | 0.0072         | 0.1056*  | -0.0299  | -0.0486       | 0.0337    | 0.0343        | -0.0286            |
|                          | t24        | -0.0062 | -0.0135  | 0.0112   | -0.0293  | 0.0806  | 0.0368           | 0.0009              | -0.0031        | 0.0659   | 0.0272   | -0.0177       | -0.0214   | 0.0337        | -0.0125            |
| serine                   | t0         | 0.3166* | -0.0082  | -0.0455  | -0.032   | 0.1351* | -0.0081          | 0.0096              | -0.0162        | 0.0843   | -0.0777  | -0.0035       | -0.0041   | 0.1945*       | -0.0099            |
|                          | t24        | 0.0063  | -0.0148  | -0.019   | -0.0027  | 0.0579  | -0.0145          | -0.0006             | -0.0065        | -0.0091  | -0.0287  | -0.0036       | 0.0267    | 0.0136        | 0.1192*            |
| threonine                | t0         | 0.1060* | -0.0166  | -0.1870* | 0.0119   | -0.0387 | 0.0018           | -0.0026             | -0.0324        | 0.0273   | 0.0217   | 0.3601*       | 0.0098    | 0.1933*       | 0.0128             |
|                          | t24        | 0.0037  | -0.0041  | -0.0869  | -0.0077  | 0.0463  | -0.0276          | 0.0105              | 0.009          | 0.0168   | 0.0008   | 0.0399        | 0.0006    | 0.0349        | 0.0116             |
| N-acetylthreonine        | t0         | -0.0147 | -0.0789  | 0.0341   | 0.0048   | 0.4763* | -0.0217          | 0.0298              | -0.0474        | -0.0586  | -0.0119  | -0.0064       | -0.0095   | -0.0177       | -0.0073            |
|                          | t24        | 0.0137  | -0.05    | 0.0334   | -0.0215  | 0.3512* | -0.0057          | 0.0099              | -0.04          | -0.0039  | -0.1202* | 0.0429        | 0.0025    | -0.0108       | 0.1009*            |
| betaine                  | t0         | 0.0001  | -0.0105  | -0.073   | 0.0223   | -0.0062 | -0.0101          | -0.0336             | -0.0402        | 0.0576   | 0.0088   | 0.0691        | 0.0019    | 0.047         | -0.0214            |
|                          | t24        | -0.0132 | 0.0139   | -0.0747  | 0.0365   | -0.0117 | -0.0167          | -0.0169             | 0.0048         | 0.0089   | 0.0096   | 0.1481*       | 0.0065    | 0.0112        | -0.03              |
| alanine                  | t0         | 0.1098* | -0.0518  | 0.0403   | -0.011   | -0.0232 | 0.018            | 0.0156              | -0.0015        | -0.1721* | 0.1511*  | 0.0071        | -0.0184   | 0.0421        | -0.0112            |
|                          | t24        | 0.4173* | 0.0367   | -0.0011  | -0.0693  | 0.0067  | 0.0333           | -0.001              | 0.0215         | 0.0035   | 0.0388   | -0.0051       | -0.03     | -0.0113       | -0.3356*           |
| aspartate                | t0         | 0.0398  | -0.0189  | -0.1195* | 0.0148   | 0.0088  | -0.0378          | 0.0342              | -0.0195        | 0.0013   | -0.0532  | -0.0013       | 0.005     | 0.0176        | 0.0371             |
|                          | t24        | 0.0047  | -0.0196  | -0.0204  | 0.0093   | 0.0332  | -0.0025          | -0.0013             | -0.0335        | -0.0121  | -0.0342  | -0.0009       | 0.0495    | 0.004         | 0.0587             |
| N-acetylaspartate (NAA)  | t0         | 0.0612  | -0.0403  | -0.0163  | -0.0178  | 0.2134* | 0.0116           | -0.0147             | -0.0138        | 0.018    | -0.1077* | -0.0627       | -0.0203   | 0.0313        | 0.0387             |
|                          | t24        | N/D     | N/D      | N/D      | N/D      | N/D     | N/D              | N/D                 | N/D            | N/D      | N/D      | N/D           | N/D       | N/D           | N/D                |
| asparagine               | t0         | 0.0529  | -0.0488  | 0.0086   | -0.0281  | 0.0219  | -0.0131          | -0.0083             | -0.0289        | -0.0039  | 0.0435   | 0.0276        | -0.0294   | 0.0566        | -0.0086            |
|                          | t24        | 0.0095  | -0.0128  | 0.0018   | -0.0155  | 0.043   | -0.0126          | 0.0408              | -0.0023        | 0.1571*  | 0.0073   | 0.2596*       | -0.0046   | 0.0872        | -0.1019*           |
| glutamate                | t0         | 0.0794  | 0.0052   | -0.0546  | 0.0112   | -0.0049 | 0.0012           | 0.0409              | -0.0299        | 0.0232   | -0.0331  | -0.0169       | 0.0433    | 0.006         | -0.0076            |
|                          | t24        | 0.1054* | -0.0172  | -0.0326  | 0.0305   | -0.0147 | 0.0218           | 0.0297              | -0.019         | -0.0118  | 0.0093   | -0.0007       | 0.4485*   | -0.0249       | 0.0142             |
| glutamine                | t0         | 0.0732  | -0.0266  | -0.0759  | 0.0181   | 0.008   | -0.0082          | -0.0501             | -0.023         | 0.2866*  | 0.0089   | 0.1174*       | -0.0111   | 0.0452        | 0.0185             |
|                          | t24        | 0.0111  | -0.0041  | -0.1048* | 0.0022   | 0.0913  | -0.0158          | -0.0153             | 0.0207         | 0.0465   | 0.0049   | 0.1471*       | -0.0202   | 0.0155        | 0.0359             |
| pyroglutamine            | t0         | 0.0416  | -0.0202  | 0.0361   | -0.0043  | -0.045  | 0.0093           | 0.0248              | -0.0096        | -0.1541* | -0.059   | -0.002        | -0.0076   | -0.0049       | 0.0038             |
|                          | t24        | 0.0829  | -0.0549  | 0.0019   | 0.008    | -0.0407 | 0.0126           | 0.0251              | -0.0198        | -0.2006* | -0.0452  | 0.0163        | -0.0077   | -0.0083       | 0.0252             |
| histidine                | t0         | 0.065   | -0.1045* | -0.0453  | 0.0489   | -0.0013 | -0.0122          | 0.0019              | -0.1261*       | 0.0357   | 0.0091   | 0.3309*       | 0.006     | 0.1145*       | 0.027              |
|                          | t24        | -0.0397 | -0.0031  | -0.0334  | 0.0359   | 0.0456  | 0.0053           | 0.0264              | -0.0051        | 0.011    | -0.0109  | 0.1097*       | 0.0068    | 0.0118        | 0.0609             |
| 3-methylhistidine        | t0         | 0.014   | 0.0108   | -0.0461  | 0.0205   | -0.0463 | -0.0015          | -0.0271             | 0.0126         | -0.0107  | 0.0389   | 0.0028        | -0.0107   | -0.0306       | 0.0409             |
|                          | t24        | 0.3946* | 0.0014   | -0.0241  | -0.0094  | -0.0103 | -0.0146          | -0.0149             | -0.0104        | 0.0048   | -0.0435  | -0.0119       | 0.0035    | -0.014        | -0.0583            |
| 1-methylimidazoleacetate | t0         | 0.0096  | -0.0003  | -0.0185  | 0.0093   | 0.5019* | -0.0001          | -0.0127             | -0.0096        | 0.0094   | -0.0392  | -0.0315       | -0.0241   | 0.0104        | 0.0604             |
|                          | t24        | -0.0047 | -0.0059  | 0.0021   | 0.021    | 0.6370* | -0.0124          | -0.0022             | -0.0279        | 0.0014   | 0.0116   | -0.0044       | -0.023    | -0.0204       | 0.0337             |
| lysine                   | t0         | 0.1135* | -0.0369  | -0.0342  | -0.0234  | 0.047   | -0.0308          | 0.0005              | -0.0223        | 0.0023   | -0.2005* | 0.0497        | 0.0055    | 0.1041*       | 0.0422             |
|                          | t24        | -0.0291 | -0.0013  | -0.0082  | 0.0012   | 0.0775  | -0.0047          | -0.0018             | -0.008         | -0.0278  | -0.0291  | -0.0084       | -0.0023   | -0.0074       | 0.1736*            |
| pipecolate               | t0         | 0.0194  | -0.0359  | -0.0294  | 0.0176   | 0.0117  | -0.0259          | -0.0228             | -0.0494        | -0.0024  | -0.0004  | 0.0607        | -0.0393   | 0.1920*       | 0.0261             |
|                          | t24        | 0.0083  | -0.0331  | -0.0397  | 0.0156   | 0.0134  | -0.0226          | -0.015              | -0.0512        | -0.0022  | -0.011   | 0.0776        | -0.022    | 0.1086*       | 0.0366             |
| phenyllactate (PLA)      | t0         | N/D     | N/D      | N/D      | N/D      | N/D     | N/D              | N/D                 | N/D            | N/D      | N/D      | N/D           | N/D       | N/D           | N/D                |
|                          | t24        | -0.0161 | -0.0046  | -0.0069  | -0.0088  | 0.2652* | -0.0081          | 0.0167              | -0.0083        | -0.0066  | -0.0036  | 0.0955        | -0.0725   | 0.3463*       | 0.1103*            |
| phenylalanine            | t0         | -0.015  | -0.0076  | -0.0011  | -0.0058  | 0.0232  | -0.0044          | 0.003               | -0.0818        | -0.0043  | -0.005   | 0.094         | -0.0767   | 0.2515*       | 0.0085             |
|                          | t24        | -0.0541 | -0.0064  | 0.01     | 0.0022   | 0.0385  | -0.0163          | 0.0466              | -0.0031        | -0.0064  | -0.0355  | 0.002         | -0.0112   | 0.0038        | 0.0456             |
| phenylacetate            | t0         | 0.0145  | -0.0061  | -0.006   | -0.0317  | 0.0249  | -0.0077          | 0.0081              | -0.0268        | -0.0932  | -0.1023* | 0.0063        | -0.0237   | 0.3154*       | 0.0832             |
|                          | t24        | N/D     | N/D      | N/D      | N/D      | N/D     | N/D              | N/D                 | N/D            | N/D      | N/D      | N/D           | N/D       | N/D           | N/D                |
| p-cresol sulfate         | t0         | -0.0057 | -0.0284  | -0.0354  | 0.0371   | 0.0597  | 0.0156           | 0.0004              | -0.0029        | -0.0094  | 0.0016   | -0.1762*      | 0.0199    | -0.0246       | 0.0344             |
|                          | t24        | -0.0102 | -0.1826* | 0.0027   | 0.0244   | 0.02    | 0.0925           | 0.0033              | -0.0051        | 0.0653   | -0.0423  | -0.012        | -0.009    | -0.0896       | 0.0173             |

| Biochemical Name            | Time Point | SIRS    | UCS      | SS       | SShock  | SNS      | <i>S. aureus</i> | <i>S. pneumonia</i> | <i>E. coli</i> | Gender  | Race     | Liver Disease | Hepatitis | Alcohol Abuse | Neoplastic Disease |
|-----------------------------|------------|---------|----------|----------|---------|----------|------------------|---------------------|----------------|---------|----------|---------------|-----------|---------------|--------------------|
| tyrosine                    | t0         | 0.0996  | -0.0251  | -0.0381  | -0.0019 | 0.0274   | -0.0346          | 0.0053              | -0.0366        | -0.0014 | 0.0094   | 0.5114*       | 0.0058    | 0.0904        | 0.0382             |
|                             | t24        | 0.0129  | 0.001    | -0.0297  | -0.036  | 0.087    | -0.0108          | -0.0072             | -0.0035        | -0.0238 | -0.0051  | 0.0612        | -0.0076   | 0.0083        | 0.0442             |
| HPLA                        | t0         | 0.0135  | -0.0196  | -0.0178  | -0.0215 | 0.1437*  | -0.0176          | -0.007              | -0.0085        | -0.0072 | -0.0145  | 0.2975*       | -0.0361   | 0.4786*       | 0.042              |
|                             | t24        | -0.0026 | -0.0122  | 0.01     | -0.0009 | 0.2523*  | -0.0035          | 0.009               | -0.0053        | -0.0043 | -0.0112  | 0.0944        | -0.0101   | 0.0336        | 0.0847             |
| 3-methoxytyrosine           | t0         | -0.0179 | -0.0115  | -0.0026  | -0.0009 | 0.1260*  | -0.0092          | -0.0061             | -0.0017        | -0.0371 | -0.015   | -0.0134       | -0.0042   | -0.0095       | 0.1395*            |
|                             | t24        | -0.0315 | -0.0147  | -0.0066  | -0.0012 | 0.1097*  | -0.0066          | -0.0147             | -0.0025        | -0.0338 | -0.0164  | -0.0049       | -0.0051   | -0.0219       | 0.2455*            |
| phenylacetylglutamine       | t0         | -0.0355 | -0.0687  | 0.0053   | 0.023   | 0.4651*  | -0.0007          | -0.0042             | 0.0106         | -0.0462 | -0.0008  | -0.2705*      | 0.0063    | 0.0062        | 0.0731             |
|                             | t24        | -0.0037 | -0.1091* | -0.0031  | -0.0137 | 0.2529*  | 0.0648           | 0.0037              | -0.0218        | 0.0237  | -0.0827  | -0.0397       | -0.0149   | -0.0558       | 0.0444             |
| phenol sulfate              | t0         | 0.0095  | -0.0145  | 0.0078   | -0.0031 | -0.0004  | -0.0361          | 0.0357              | -0.0083        | 0.0129  | -0.0197  | 0.0269        | -0.018    | -0.02         | 0.1322*            |
|                             | t24        | -0.0132 | -0.0888  | 0.0006   | 0.0155  | 0.0565   | -0.0067          | 0.0318              | 0.0037         | 0.0311  | -0.1836* | 0.025         | -0.0292   | -0.0737       | 0.0155             |
| kynurenate                  | t0         | 0.0038  | -0.0294  | -0.0126  | 0.0211  | 0.3460*  | -0.0168          | 0.0592              | 0.0156         | -0.0306 | -0.0297  | 0.0079        | 0.0069    | 0.0867        | 0.0164             |
|                             | t24        | N/D     | N/D      | N/D      | N/D     | N/D      | N/D              | N/D                 | N/D            | N/D     | N/D      | N/D           | N/D       | N/D           | N/D                |
| kynurenine                  | t0         | 0.0004  | 0.0032   | 0.0076   | 0.0072  | 0.0048   | -0.0509          | 0.0474              | -0.0871        | 0.0008  | 0.1079*  | 0.0217        | 0.0118    | 0.0445        | -0.0002            |
|                             | t24        | -0.0441 | 0.0031   | 0.011    | -0.0164 | 0.02     | 0.0037           | 0.0675              | -0.0403        | 0.0005  | 0.0143   | 0.0109        | -0.0231   | -0.0224       | 0.0044             |
| tryptophan                  | t0         | 0.1350* | 0.0089   | -0.0182  | -0.0098 | -0.0314  | 0.015            | -0.0107             | -0.0228        | 0.0215  | 0.0919   | -0.0135       | 0.0034    | -0.0408       | -0.0774            |
|                             | t24        | 0.0738  | 0.0657   | -0.0204  | -0.0561 | -0.0386  | 0.0069           | -0.0052             | 0.0651         | -0.0199 | 0.0342   | -0.0066       | 0.0028    | -0.0776       | -0.0234            |
| indolelactate               | t0         | -0.0126 | -0.0284  | -0.0028  | 0.0356  | 0.0385   | -0.0034          | 0.0285              | -0.0334        | -0.0185 | -0.0066  | -0.0255       | 0.0244    | 0.0061        | 0.2796*            |
|                             | t24        | -0.0409 | -0.0605  | 0.0414   | -0.0179 | 0.0735   | -0.0021          | 0.0198              | -0.0229        | 0.003   | -0.0117  | 0.0038        | -0.0025   | -0.0211       | 0.0465             |
| indoleacetate               | t0         | N/D     | N/D      | N/D      | N/D     | N/D      | N/D              | N/D                 | N/D            | N/D     | N/D      | N/D           | N/D       | N/D           | N/D                |
|                             | t24        | 0.0219  | -0.1044* | -0.0096  | -0.0176 | 0.0734   | 0.0588           | -0.0493             | -0.0466        | 0.0199  | -0.0042  | 0.2079*       | 0.0151    | -0.0517       | 0.0042             |
| 3-indoxyl sulfate           | t0         | -0.0283 | -0.0493  | -0.0318  | 0.1197* | 0.0804   | -0.0421          | 0.003               | 0.0322         | -0.0759 | -0.0048  | -0.1132*      | 0.0363    | -0.0342       | 0.0725             |
|                             | t24        | -0.0046 | -0.1072* | -0.0243  | 0.0239  | 0.0648   | -0.006           | 0.0125              | -0.0235        | 0.076   | -0.0812  | -0.0253       | -0.0254   | -0.1435*      | 0.0199             |
| indolepropionate            | t0         | N/D     | N/D      | N/D      | N/D     | N/D      | N/D              | N/D                 | N/D            | N/D     | N/D      | N/D           | N/D       | N/D           | N/D                |
|                             | t24        | 0.0299  | -0.0006  | -0.0388  | -0.0158 | 0.0084   | -0.0582          | 0.0146              | 0.2902*        | 0.0041  | 0.036    | 0.04          | -0.0012   | 0.009         | -0.0163            |
| C-glycosyltryptophan        | t0         | -0.0056 | -0.0377  | 0.0112   | 0.0051  | 0.5675*  | -0.0121          | -0.0154             | 0.0028         | -0.0104 | -0.0049  | -0.1039*      | -0.0031   | -0.04         | 0.0848             |
|                             | t24        | 0.0163  | -0.095   | 0.0238   | -0.0147 | 0.4037*  | 0.0001           | -0.052              | 0.0068         | 0.1560* | -0.0016  | -0.0038       | -0.0107   | -0.0679       | 0.0359             |
| 3-methyl-2-oxobutyrate      | t0         | 0.0303  | -0.0472  | -0.0151  | 0.0642  | -0.0055  | -0.0054          | 0.0237              | 0.0011         | 0.03    | -0.0321  | -0.0014       | -0.0054   | 0.1029*       | 0.011              |
|                             | t24        | -0.0445 | 0.0058   | -0.0001  | 0.0205  | 0.0038   | 0.0202           | 0.2057*             | -0.0093        | 0.0082  | 0.0346   | -0.0092       | 0.0463    | -0.0265       | 0.026              |
| 3-methyl-2-oxovalerate      | t0         | 0.0726  | -0.0439  | -0.002   | -0.0098 | 0.0007   | 0.0308           | 0.0063              | -0.0349        | 0.0322  | 0.0142   | -0.0247       | -0.0256   | 0.0005        | -0.0522            |
|                             | t24        | 0.0216  | -0.0064  | 0.0106   | 0.0086  | -0.1040* | 0.0091           | 0.1480*             | -0.0014        | 0.0039  | 0.0346   | -0.1702*      | 0.1411*   | -0.012        | -0.0424            |
| beta-hydroxyisovalerate     | t0         | -0.0044 | -0.0189  | 0.0253   | -0.0039 | 0.0172   | -0.0115          | 0.0263              | -0.0195        | -0.003  | -0.0509  | 0.0035        | -0.0087   | 0.7757*       | -0.0032            |
|                             | t24        | -0.0424 | 0.015    | 0.0167   | -0.0065 | 0.0015   | 0.0109           | -0.0103             | -0.0185        | -0.0274 | -0.1561* | -0.0639       | 0.0274    | 0.0135        | 0.0388             |
| isoleucine                  | t0         | 0.1272* | -0.055   | -0.0157  | -0.0371 | 0.0684   | 0.1990*          | 0.003               | -0.0351        | 0.0105  | -0.0253  | -0.0349       | -0.0202   | 0.0157        | -0.0296            |
|                             | t24        | 0.0658  | 0.0183   | 0.0074   | -0.021  | -0.0407  | 0.0022           | 0.0133              | -0.0019        | 0.0041  | 0.0178   | -0.0895       | 0.0264    | 0.0239        | -0.0031            |
| leucine                     | t0         | -0.0046 | -0.0065  | -0.1031* | 0.0528  | 0.0267   | 0.0475           | -0.0024             | -0.011         | 0.0216  | -0.0361  | -0.045        | 0.0106    | 0.0293        | 0.0184             |
|                             | t24        | 0.0101  | 0.0484   | -0.0049  | -0.0319 | -0.0067  | -0.0021          | 0.0157              | 0.0119         | -0.0259 | -0.0007  | -0.0188       | 0.0051    | -0.0104       | 0.0461             |
| N-acetylalanine             | t0         | -0.0199 | -0.0761  | 0.0262   | 0.0498  | 0.5542*  | -0.0375          | 0.0169              | 0.0029         | -0.0512 | -0.0169  | -0.0273       | -0.0082   | 0.0302        | 0.0561             |
|                             | t24        | -0.0814 | -0.0898  | 0.0195   | 0.0398  | 0.3995*  | 0.0014           | 0.0369              | -0.0164        | 0.0267  | -0.0608  | -0.0001       | -0.0079   | -0.0086       | 0.2252*            |
| valine                      | t0         | 0.0353  | -0.0071  | -0.0764  | 0.0437  | -0.0563  | 0.0832           | -0.0435             | -0.0304        | -0.0011 | 0.021    | -0.0576       | 0.0099    | 0.0907        | 0.0212             |
|                             | t24        | 0.0114  | 0.0428   | -0.0164  | 0.0168  | -0.0164  | -0.0012          | 0.0007              | 0.0066         | -0.0077 | 0.0087   | -0.0281       | 0.0013    | -0.024        | 0.0193             |
| 4-methyl-2-oxopentanoate    | t0         | 0.0277  | -0.0178  | 0.0112   | 0.0541  | -0.1047* | 0.0331           | -0.0047             | -0.0201        | 0.0103  | 0.0254   | -0.0098       | 0.0067    | 0.0024        | -0.0373            |
|                             | t24        | -0.0238 | 0.0599   | 0.0067   | 0.0233  | -0.1056* | 0.0117           | 0.1010*             | 0.0285         | -0.0019 | 0.0177   | -0.0242       | 0.0147    | -0.0537       | -0.0228            |
| 3-hydroxy-2-ethylpropionate | t0         | -0.0078 | -0.0828  | 0.0052   | 0.0311  | 0.1491*  | 0.0146           | 0.0137              | -0.0011        | -0.0169 | -0.0377  | -0.1019*      | -0.1267*  | 0.1389*       | 0.0156             |
|                             | t24        | -0.0053 | -0.0382  | 0.0015   | -0.0077 | 0.1366*  | -0.016           | 0.0626              | -0.0201        | -0.0006 | -0.011   | 0.0368        | -0.0033   | 0.1510*       | 0.1144*            |
| alpha-hydroxyisovalerate    | t0         | -0.0168 | -0.0333  | -0.0157  | 0.027   | 0.0522   | -0.0083          | -0.0096             | -0.0276        | 0.0043  | -0.0213  | 0.1780*       | -0.0333   | 0.1404*       | 0.0306             |
|                             | t24        | 0.0045  | -0.0192  | -0.0136  | 0.0038  | 0.0639   | -0.0006          | -0.0135             | -0.023         | 0.0023  | -0.0411  | 0.0885        | -0.0473   | 0.3347*       | 0.0827             |
| propionylcarnitine (C3)     | t0         | 0.0241  | -0.0369  | -0.0008  | -0.0251 | 0.2969*  | 0.0089           | 0.0062              | -0.0222        | 0.0279  | -0.0728  | -0.0192       | -0.0053   | 0.0208        | -0.0006            |
|                             | t24        | -0.0032 | -0.0886  | 0.0065   | -0.0192 | 0.1353*  | -0.0068          | 0.0446              | -0.0486        | 0.0054  | -0.1238* | 0.0037        | -0.0314   | -0.0456       | -0.0107            |
| butyrylcarnitine (C4)       | t0         | -0.054  | 0.0178   | 0.0076   | -0.0444 | 0.1949*  | -0.0661          | 0.0138              | -0.0126        | -0.0234 | -0.0059  | 0.0016        | -0.0123   | 0.0175        | 0.0236             |
|                             | t24        | -0.062  | 0.0237   | -0.0297  | -0.0002 | 0.1021*  | -0.0671          | 0.0026              | -0.0471        | -0.026  | 0.0574   | 0.0399        | -0.0116   | -0.0151       | -0.0001            |

| Biochemical Name                | Time Point | SIRS    | UCS      | SS       | SShock  | SNS      | <i>S. aureus</i> | <i>S. pneumonia</i> | <i>E. coli</i> | Gender   | Race     | Liver Disease | Hepatitis | Alcohol Abuse | Neoplastic Disease |
|---------------------------------|------------|---------|----------|----------|---------|----------|------------------|---------------------|----------------|----------|----------|---------------|-----------|---------------|--------------------|
| isobutyrylcarnitine (C4)        | t0         | 0.0111  | -0.0336  | -0.0034  | 0.0146  | 0.4893*  | 0.0008           | -0.003              | -0.0059        | -0.0154  | -0.083   | -0.0815       | -0.0123   | -0.0012       | 0.0208             |
|                                 | t24        | 0.0243  | -0.0424  | 0.0018   | -0.0078 | 0.2968*  | 0.0005           | -0.0074             | -0.022         | -0.0017  | -0.1024* | -0.0429       | -0.0172   | -0.0297       | 0.0214             |
| 2-methylbutyrylcarnitine (C5)   | t0         | -0.0004 | -0.0278  | 0.0218   | 0.0067  | 0.4444*  | 0.0089           | 0.0112              | -0.0142        | -0.0186  | -0.0573  | -0.0815       | -0.0079   | 0.0203        | 0.0049             |
|                                 | t24        | -0.0647 | -0.0282  | 0.0144   | -0.0039 | 0.2055*  | -0.0059          | 0.0267              | -0.0104        | 0.0109   | -0.1558* | -0.0176       | -0.0116   | -0.0117       | 0.0086             |
| isovalerylcarnitine (C5)        | t0         | 0.0029  | -0.0476  | 0.0122   | -0.0198 | 0.0685   | -0.0136          | 0.1051*             | -0.0178        | -0.0247  | -0.055   | -0.0044       | 0.0126    | 0.0513        | -0.0027            |
|                                 | t24        | -0.0042 | -0.0178  | 0.0118   | 0.0062  | 0.0102   | -0.0234          | 0.0908              | -0.0056        | -0.0082  | -0.0142  | -0.0087       | -0.0096   | -0.0195       | 0.0074             |
| hydroxyisovalerylcarnitine (C5) | t0         | 0.0042  | -0.0754  | -0.0283  | -0.0059 | 0.2591*  | -0.029           | 0.0391              | -0.0001        | -0.0128  | -0.0518  | -0.0142       | -0.0129   | 0.0375        | -0.0363            |
|                                 | t24        | -0.0208 | -0.0625  | 0.0223   | 0.012   | 0.1123*  | -0.0125          | 0.0596              | -0.0473        | 0.008    | -0.0377  | -0.0091       | -0.008    | 0.0222        | -0.009             |
| tiglyl carnitine (C5)           | t0         | 0.005   | -0.0342  | 0.0077   | -0.005  | 0.3762*  | -0.0032          | 0.0193              | -0.0017        | -0.0229  | -0.0298  | -0.0113       | -0.0046   | 0.0132        | -0.0126            |
|                                 | t24        | -0.002  | -0.0389  | 0.0061   | -0.011  | 0.1166*  | -0.0138          | 0.0283              | -0.0328        | -0.0087  | -0.0666  | 0.0198        | -0.014    | -0.0309       | 0.0235             |
| cysteine                        | t0         | 0.0179  | -0.0238  | -0.0641  | 0.0016  | 0.0432   | -0.0424          | 0.0356              | -0.043         | 0.0317   | -0.0417  | -0.0378       | -0.0057   | -0.0001       | 0.0667             |
|                                 | t24        | -0.0193 | -0.0305  | -0.0161  | 0.0101  | 0.0643   | -0.0074          | 0.0066              | -0.0281        | 0.0198   | -0.0066  | -0.01         | 0.0143    | -0.034        | 0.1105*            |
| cystine                         | t0         | 0.0361  | -0.0286  | -0.0569  | -0.018  | 0.0776   | -0.0205          | 0.0242              | -0.0406        | 0.0283   | -0.1029* | 0.0016        | -0.0067   | 0.0138        | 0.1134*            |
|                                 | t24        | N/D     | N/D      | N/D      | N/D     | N/D      | N/D              | N/D                 | N/D            | N/D      | N/D      | N/D           | N/D       | N/D           | N/D                |
| methionine                      | t0         | 0.0923  | -0.011   | -0.0192  | -0.0094 | -0.0096  | -0.016           | 0.0191              | -0.0088        | -0.0131  | -0.0542  | 0.4672*       | -0.0058   | 0.0413        | 0.0015             |
|                                 | t24        | 0.0135  | -0.0099  | -0.0231  | -0.0095 | 0.0302   | -0.0298          | 0.0144              | -0.0071        | -0.0124  | -0.0502  | 0.2766*       | 0.0082    | 0.0078        | 0.0494             |
| alpha-ketobutyrate              | t0         | -0.0055 | -0.0331  | 0.0257   | -0.0103 | 0.0261   | 0.0304           | -0.0089             | 0.0142         | -0.0068  | -0.1299* | 0.0173        | -0.0881   | 0.2720*       | -0.0076            |
|                                 | t24        | -0.0224 | -0.0235  | 0.034    | 0.0139  | -0.0075  | -0.0146          | 0.0979              | -0.0264        | -0.002   | 0.0401   | -0.0204       | -0.0147   | 0.2588*       | 0.0418             |
| 2-hydroxybutyrate (AHB)         | t0         | -0.0007 | -0.0462  | -0.0006  | -0.0049 | 0.0335   | -0.0016          | 0.0077              | -0.0081        | -0.0205  | -0.0507  | 0.0375        | -0.2275*  | 0.4143*       | 0.0027             |
|                                 | t24        | -0.0013 | -0.0967  | 0.027    | -0.0104 | 0.0356   | -0.0132          | 0.1689*             | -0.0134        | -0.0183  | -0.0042  | 0.0216        | -0.0641   | 0.0476        | 0.0317             |
| SDMA                            | t0         | 0.0685  | -0.0161  | 0.022    | -0.0304 | 0.6283*  | -0.0093          | 0.0184              | 0.0019         | -0.0025  | -0.0223  | 0.0085        | -0.013    | 0.0018        | 0.004              |
|                                 | t24        | 0.007   | -0.0207  | -0.0038  | 0.0045  | 0.3515*  | -0.0097          | 0.0061              | 0.0185         | -0.0075  | -0.0071  | 0.0786        | 0.0043    | -0.0288       | 0.0604             |
| arginine                        | t0         | 0.2971* | -0.0026  | -0.0043  | 0.0225  | -0.0928  | 0.0343           | 0.0217              | -0.0271        | 0.0254   | -0.0186  | 0.2545*       | -0.0227   | 0.0329        | 0.0614             |
|                                 | t24        | 0.1819* | 0.0042   | -0.0379  | -0.0401 | -0.0013  | -0.0266          | -0.0211             | 0.0369         | 0.0081   | 0.0112   | 0.1703*       | -0.0204   | -0.0041       | -0.0031            |
| ornithine                       | t0         | 0.0001  | -0.0075  | -0.0403  | 0.0112  | 0.1106*  | -0.0599          | 0.0007              | -0.0564        | 0.0305   | -0.1068* | 0.0255        | 0.0251    | 0.0335        | 0.0908             |
|                                 | t24        | -0.0153 | -0.0082  | -0.0154  | 0.005   | 0.0804   | -0.0107          | -0.0013             | -0.005         | -0.0277  | -0.0149  | -0.007        | 0.0204    | 0.0026        | 0.1811*            |
| urea                            | t0         | 0.0142  | -0.1340* | 0.0046   | -0.0157 | 0.3791*  | -0.0232          | 0.0232              | -0.0051        | -0.1134* | -0.0619  | -0.018        | -0.0223   | 0.0008        | 0.0188             |
|                                 | t24        | 0.0251  | -0.3186* | -0.0168  | -0.0406 | 0.1392*  | -0.0095          | 0.0055              | -0.013         | 0.0008   | -0.0063  | 0.009         | -0.019    | -0.0748       | 0.031              |
| proline                         | t0         | 0.0346  | -0.0036  | -0.1079* | -0.0013 | 0.0396   | -0.0122          | -0.0383             | -0.054         | 0.021    | 0.0206   | 0.1724*       | -0.0505   | 0.3312*       | 0.0849             |
|                                 | t24        | 0.0075  | -0.008   | -0.0734  | -0.0206 | 0.1197*  | -0.0187          | -0.0239             | -0.0095        | 0.0037   | -0.0237  | 0.0263        | 0.0088    | 0.031         | 0.069              |
| citrulline                      | t0         | 0.1176* | 0.0125   | -0.0744  | -0.0014 | -0.0827  | 0.0089           | -0.0424             | -0.0177        | 0.0196   | 0.1136*  | 0.0419        | 0.0124    | 0.0006        | 0.2876*            |
|                                 | t24        | 0.1070* | 0.0231   | -0.0598  | -0.0117 | -0.0433  | 0.0071           | -0.0247             | 0.0008         | 0.0084   | 0.0191   | 0.01          | 0.0278    | -0.0101       | 0.1271*            |
| N-acetylorithine                | t0         | -0.0014 | 0.029    | 0.0113   | -0.0495 | 0.0085   | 0.0349           | -0.0033             | -0.0203        | -0.1192* | 0.2535*  | -0.0019       | 0.0157    | 0.0116        | -0.0255            |
|                                 | t24        | 0.0109  | 0.0032   | -0.015   | -0.0071 | -0.003   | -0.0007          | -0.0488             | -0.0163        | -0.0587  | 0.0811   | -0.0285       | -0.0265   | -0.0333       | -0.0218            |
| hydroxyproline                  | t0         | 0.0007  | -0.0295  | -0.016   | -0.0041 | 0.1770*  | -0.0147          | -0.0082             | -0.0107        | 0.0139   | -0.0004  | 0.0313        | 0.0068    | 0.0413        | 0.3116*            |
|                                 | t24        | 0.0327  | -0.0008  | -0.0274  | -0.0227 | 0.3682*  | -0.001           | -0.0266             | -0.005         | 0.0276   | -0.0239  | 0.1220*       | -0.0048   | 0.0098        | 0.0824             |
| homocitrulline                  | t0         | 0.0262  | -0.2105* | 0.0063   | -0.0391 | 0.0306   | -0.0715          | -0.0238             | 0.1015*        | -0.0191  | -0.1377* | -0.0078       | -0.0457   | -0.0206       | 0.0224             |
|                                 | t24        | N/D     | N/D      | N/D      | N/D     | N/D      | N/D              | N/D                 | N/D            | N/D      | N/D      | N/D           | N/D       | N/D           | N/D                |
| stachydrine                     | t0         | 0.031   | -0.012   | -0.0092  | -0.024  | 0.0188   | -0.0451          | -0.0038             | -0.057         | -0.029   | -0.042   | 0.0913        | 0.0372    | -0.0245       | -0.0279            |
|                                 | t24        | 0.0225  | -0.023   | 0.0038   | -0.0506 | 0.0075   | -0.0106          | -0.0027             | -0.0781        | 0.042    | -0.0215  | 0.0267        | -0.0154   | -0.0598       | -0.0254            |
| homostachydrine                 | t0         | N/D     | N/D      | N/D      | N/D     | N/D      | N/D              | N/D                 | N/D            | N/D      | N/D      | N/D           | N/D       | N/D           | N/D                |
|                                 | t24        | 0.0089  | 0.0237   | 0.049    | -0.014  | -0.1046* | 0.0182           | -0.0048             | -0.017         | -0.009   | 0.0413   | 0.0093        | -0.0229   | -0.0348       | -0.0069            |
| creatine                        | t0         | -0.0239 | -0.0431  | 0.0852   | -0.0199 | 0.4685*  | 0.0069           | 0.0068              | -0.0098        | 0.0987   | -0.0499  | -0.0832       | -0.0241   | 0.052         | -0.0206            |
|                                 | t24        | -0.0088 | -0.1013* | 0.0952   | -0.0384 | 0.2703*  | 0.0181           | -0.0045             | -0.0051        | 0.1957*  | -0.0173  | 0.0163        | -0.0188   | -0.0106       | -0.0595            |
| creatinine                      | t0         | -0.0059 | 0.0302   | -0.0123  | 0.0088  | -0.0061  | 0.0059           | 0.0149              | -0.0011        | -0.0518  | -0.0484  | 0.0073        | 0.1574*   | -0.0621       | 0.0169             |
|                                 | t24        | 0.0474  | -0.013   | 0.0048   | 0.0015  | -0.0219  | -0.0111          | -0.0044             | 0.0025         | 0.0179   | -0.0253  | 0.0362        | -0.0198   | -0.065        | 0.004              |
| 2-aminobutyrate                 | t0         | 0.0584  | -0.0131  | 0.0245   | -0.0305 | -0.0176  | 0.011            | -0.0332             | -0.0068        | -0.0062  | 0.0284   | 0.015         | -0.0521   | 0.2452*       | -0.0943            |
|                                 | t24        | 0.1331* | -0.0176  | 0.0366   | -0.0179 | -0.0777  | -0.0176          | 0.0112              | -0.0047        | 0.0255   | 0.1276*  | -0.0119       | -0.0192   | 0.1575*       | -0.1066*           |
| 5-methylthioadenosine (MTA)     | t0         | N/D     | N/D      | N/D      | N/D     | N/D      | N/D              | N/D                 | N/D            | N/D      | N/D      | N/D           | N/D       | N/D           | N/D                |
|                                 | t24        | -0.001  | -0.0123  | -0.0107  | 0.0109  | 0.0362   | -0.0103          | 0.4318*             | -0.0435        | 0.0011   | -0.0414  | 0.2197*       | -0.0598   | -0.1266*      | -0.0007            |

| Biochemical Name              | Time Point | SIRS     | UCS      | SS       | SShock   | SNS      | <i>S. aureus</i> | <i>S. pneumonia</i> | <i>E. coli</i> | Gender   | Race    | Liver Disease | Hepatitis | Alcohol Abuse | Neoplastic Disease |
|-------------------------------|------------|----------|----------|----------|----------|----------|------------------|---------------------|----------------|----------|---------|---------------|-----------|---------------|--------------------|
| 4-acetamidobutanoate          | t0         | -0.0071  | -0.0414  | -0.003   | 0.073    | 0.5362*  | -0.0241          | 0.0225              | -0.0052        | 0.0025   | 0.0033  | -0.0166       | -0.0017   | 0.001         | 0.082              |
|                               | t24        | -0.0208  | -0.0302  | 0.0136   | 0.0227   | 0.5559*  | 0.0029           | 0.0141              | -0.0086        | 0.0132   | -0.0264 | -0.0003       | -0.0011   | 0.0023        | 0.057              |
| 5-oxoproline                  | t0         | -0.0191  | 0.01     | -0.0134  | 0.0154   | 0.016    | -0.0038          | 0.0689              | -0.0417        | 0.0251   | -0.0164 | -0.0023       | -0.081    | 0.0329        | 0.0004             |
|                               | t24        | -0.011   | 0.0195   | -0.0265  | -0.1396* | 0.0588   | 0.0111           | -0.1139*            | -0.0019        | 0.0319   | 0.0372  | 0.00229       | -0.0123   | -0.0189       | -0.0145            |
| prolylhydroxyproline          | t0         | 0.011    | -0.011   | -0.0063  | -0.0066  | 0.5816*  | 0.0181           | -0.0583             | -0.0313        | 0.0002   | 0.0198  | -0.0371       | 0.0108    | 0.0018        | -0.0051            |
|                               | t24        | -0.0006  | -0.0073  | 0.0465   | -0.0385  | 0.6064*  | 0.0244           | -0.1650*            | 0.0085         | -0.012   | -0.0044 | 0.0076        | -0.0183   | -0.0205       | 0.0024             |
| glutamylvaline                | t0         | -0.0102  | -0.0441  | -0.0182  | 0.0191   | 0.1409*  | -0.0182          | -0.0152             | -0.0804        | -0.0012  | 0.0238  | -0.0155       | 0.0031    | 0.032         | 0.0062             |
|                               | t24        | 0.0113   | -0.0038  | -0.0649  | -0.0058  | 0.1359*  | -0.0235          | -0.0231             | 0.0008         | 0.0028   | -0.0351 | 0.0111        | -0.0018   | -0.0425       | 0.0343             |
| gamma-glutamylleucine         | t0         | -0.0102  | -0.0075  | -0.0468  | 0.03     | 0.0115   | -0.0025          | -0.0168             | -0.0636        | 0.0384   | 0.0145  | -0.0373       | -0.0086   | 0.0316        | 0.0237             |
|                               | t24        | -0.0052  | 0.0124   | -0.0496  | -0.0221  | 0.0516   | -0.0191          | -0.0138             | -0.0109        | -0.0048  | 0.0004  | -0.0156       | 0.0034    | -0.0236       | 0.0602             |
| gamma-glutamylisoleucine      | t0         | N/D      | N/D      | N/D      | N/D      | N/D      | N/D              | N/D                 | N/D            | N/D      | N/D     | N/D           | N/D       | N/D           | N/D                |
|                               | t24        | 0.0221   | 0.0135   | -0.1031* | -0.0514  | 0.0492   | -0.0502          | -0.0276             | -0.0264        | 0.0189   | -0.0266 | -0.027        | 0.0335    | -0.0042       | 0.034              |
| gamma-glutamylglutamine       | t0         | 0.0192   | -0.0575  | -0.0051  | 0.0814   | -0.0213  | -0.0294          | -0.0146             | -0.0175        | 0.2281*  | 0.1545* | 0.0059        | -0.066    | 0.1569*       | 0.0036             |
|                               | t24        | 0.0159   | 0.0391   | -0.0927  | -0.0208  | -0.0063  | -0.1325*         | -0.0706             | 0.0434         | 0.0114   | 0.0534  | 0.0714        | -0.0323   | 0.0387        | 0.0251             |
| gamma-glutamylphenylalanine   | t0         | -0.0278  | 0.002    | -0.0233  | -0.0279  | 0.1165*  | -0.0269          | 0.0079              | -0.0752        | 0.0024   | 0.0002  | 0.0312        | -0.0419   | 0.2631*       | 0.0145             |
|                               | t24        | -0.023   | 0.0019   | -0.0197  | 0.0114   | 0.1185*  | -0.0215          | 0.0078              | -0.0156        | 0.0094   | -0.0178 | 0.0009        | -0.0101   | -0.0063       | 0.1356*            |
| gamma-glutamyltyrosine        | t0         | 0.0255   | -0.0128  | -0.0501  | 0.0011   | 0.029    | -0.0727          | 0.0088              | -0.0482        | 0.0119   | 0.0087  | 0.4958*       | -0.0031   | 0.1385*       | 0.0612             |
|                               | t24        | 0.0032   | -0.0115  | -0.053   | -0.0107  | 0.2191*  | -0.0117          | -0.0138             | -0.0131        | -0.0115  | -0.0008 | 0.0502        | 0.0114    | 0.0029        | 0.0559             |
| N-acetylglucosamine 6-sulfate | t0         | N/D      | N/D      | N/D      | N/D      | N/D      | N/D              | N/D                 | N/D            | N/D      | N/D     | N/D           | N/D       | N/D           | N/D                |
|                               | t24        | 0.0126   | -0.0387  | -0.002   | -0.0056  | 0.1834*  | -0.0231          | 0.0168              | -0.0802        | 0.0372   | -0.012  | -0.0478       | 0.0045    | -0.1636*      | 0.0202             |
| erythronate                   | t0         | -0.0181  | -0.0763  | 0.0211   | 0.0516   | 0.5252*  | -0.0356          | 0.0445              | -0.0076        | -0.0865  | -0.0103 | -0.0171       | 0.0346    | -0.0044       | 0.0099             |
|                               | t24        | 0.0109   | -0.0861  | 0.0069   | 0.01     | 0.4466*  | -0.0183          | 0.0068              | -0.0152        | 0.0073   | -0.0548 | 0.0619        | -0.0063   | -0.0104       | 0.0101             |
| N-acetylneuraminate           | t0         | -0.0147  | -0.0103  | -0.0044  | -0.0079  | 0.1291*  | -0.0085          | -0.004              | 0.0018         | -0.034   | -0.0298 | -0.022        | 0.0017    | -0.0035       | 0.1126*            |
|                               | t24        | -0.0277  | -0.0077  | 0.0004   | -0.006   | 0.0709   | -0.0042          | -0.0015             | -0.0034        | -0.031   | -0.0238 | -0.0092       | -0.0028   | -0.0057       | 0.1856*            |
| erythrose                     | t0         | 0.2576*  | -0.067   | -0.0484  | 0.1165*  | -0.0442  | 0.0337           | -0.0326             | -0.0346        | -0.0103  | -0.022  | -0.0054       | -0.054    | 0.0267        | 0.028              |
|                               | t24        | -0.0026  | 0.0141   | -0.0181  | 0.0471   | -0.0162  | -0.0156          | 0.0262              | -0.0046        | -0.0289  | 0.0106  | 0.0193        | -0.0297   | 0.029         | 0.01               |
| fructose                      | t0         | 0.0111   | -0.0312  | -0.0469  | 0.1136*  | -0.0511  | 0.0016           | -0.1505*            | -0.0814        | -0.0059  | 0.0142  | -0.0165       | -0.0314   | -0.043        | -0.0151            |
|                               | t24        | 0.0294   | 0.0124   | 0.0088   | -0.0037  | -0.1572* | 0.031            | -0.1032*            | -0.0177        | 0.0016   | -0.0812 | 0.0061        | -0.0127   | 0.0112        | -0.0291            |
| maltose                       | t0         | -0.0127  | -0.0156  | -0.0625  | 0.0396   | 0.0401   | -0.0108          | -0.0264             | 0.0686         | -0.0325  | -0.0081 | -0.0516       | -0.0228   | -0.057        | 0.0289             |
|                               | t24        | N/D      | N/D      | N/D      | N/D      | N/D      | N/D              | N/D                 | N/D            | N/D      | N/D     | N/D           | N/D       | N/D           | N/D                |
| mannitol                      | t0         | -0.0082  | -0.012   | -0.0015  | -0.0019  | 0.076    | -0.0107          | -0.0121             | -0.0074        | -0.0262  | -0.0174 | 0.005         | -0.0059   | 0.0744        | 0.4211*            |
|                               | t24        | -0.0443  | -0.0246  | 0.0234   | -0.015   | 0.2776*  | 0.0325           | -0.0343             | -0.0139        | -0.1043* | -0.0737 | 0.044         | -0.0001   | -0.0012       | 0.0806             |
| mannose                       | t0         | -0.0342  | -0.046   | 0.0559   | 0.0511   | -0.0498  | 0.1521*          | -0.0585             | -0.0139        | -0.0815  | -0.0291 | -0.041        | -0.0369   | -0.0105       | -0.0108            |
|                               | t24        | -0.0067  | -0.0421  | 0.2164*  | 0.2188*  | -0.0398  | 0.0261           | 0.0198              | -0.0001        | 0.0053   | 0.0292  | -0.0459       | -0.0919   | -0.0023       | 0.0114             |
| sucrose                       | t0         | -0.0113  | 0.0064   | -0.0027  | -0.0049  | 0.3848*  | 0.0188           | -0.0159             | -0.0115        | -0.0113  | -0.0202 | -0.0584       | -0.0022   | -0.0071       | 0.0096             |
|                               | t24        | 0.0131   | -0.0015  | -0.0146  | -0.0051  | 0.3196*  | 0.0226           | -0.0263             | -0.0358        | 0.0161   | -0.0015 | -0.026        | -0.0101   | -0.0217       | 0.0571             |
| 1,5-anhydroglucitol (1,5-AG)  | t0         | 0.0213   | 0.2563*  | -0.0065  | -0.0433  | -0.09    | -0.2332*         | 0.0251              | -0.0139        | -0.0392  | 0.016   | -0.0223       | 0.01      | 0.02          | 0.0121             |
|                               | t24        | 0.0346   | 0.4149*  | 0.0015   | 0.0033   | -0.1379* | -0.2901*         | 0.0062              | -0.0015        | -0.0349  | 0.0159  | -0.0161       | -0.0077   | 0.0147        | 0.0229             |
| glycerate                     | t0         | 0.0443   | -0.056   | -0.0222  | -0.0142  | 0.1650*  | -0.0214          | -0.0233             | 0.0041         | -0.0508  | 0.0328  | -0.0228       | -0.0141   | -0.0209       | -0.0331            |
|                               | t24        | 0.0539   | -0.0536  | -0.0385  | -0.0099  | 0.071    | -0.027           | -0.0445             | -0.0016        | -0.0236  | 0.0188  | 0.053         | -0.0244   | -0.0362       | -0.0324            |
| glucose                       | t0         | 0.005    | -0.0311  | 0.009    | 0.1354*  | -0.0084  | 0.0332           | -0.0904             | -0.0195        | -0.0964  | -0.0065 | -0.0091       | -0.0355   | 0.0068        | -0.0114            |
|                               | t24        | 0.028    | -0.0644  | -0.0204  | 0.1137*  | -0.0263  | -0.0055          | 0.0286              | -0.0078        | 0.0285   | -0.0654 | -0.0138       | -0.1200*  | 0.0253        | 0.0086             |
| 1,6-anhydroglucose            | t0         | 0.0349   | 0.005    | -0.0495  | -0.0355  | 0.078    | 0.0202           | -0.0077             | -0.0543        | -0.0212  | 0.0527  | 0.0069        | 0.0223    | -0.017        | 0.0372             |
|                               | t24        | N/D      | N/D      | N/D      | N/D      | N/D      | N/D              | N/D                 | N/D            | N/D      | N/D     | N/D           | N/D       | N/D           | N/D                |
| dihydroxyacetone              | t0         | 0.0536   | -0.0647  | 0.0095   | 0.0467   | -0.1229* | 0.0877           | -0.0644             | -0.0068        | -0.0236  | -0.0336 | 0.0664        | -0.0358   | 0.0461        | 0.0072             |
|                               | t24        | 0.0122   | 0.0041   | -0.0056  | 0.0633   | -0.0558  | 0.0301           | -0.0175             | -0.037         | -0.0276  | 0.0226  | -0.0197       | -0.0109   | 0.0339        | 0.0127             |
| pyruvate                      | t0         | -0.1595* | -0.0592  | 0.0115   | 0.0341   | 0.0583   | -0.0393          | 0.0236              | -0.028         | -0.0154  | 0.0165  | 0.3380*       | -0.0481   | 0.0639        | 0.0275             |
|                               | t24        | -0.0008  | -0.0248  | -0.0061  | -0.0011  | 0.3591*  | -0.007           | -0.0055             | -0.0216        | 0.0016   | -0.0127 | -0.0136       | -0.0286   | 0.0278        | -0.0278            |
| lactate                       | t0         | -0.0186  | -0.1254* | 0.0003   | 0.0318   | 0.3454*  | -0.0191          | 0.0632              | -0.0241        | -0.0701  | -0.0163 | 0.0554        | -0.0925   | 0.1426*       | 0.0314             |
|                               | t24        | -0.0014  | -0.0239  | -0.0019  | -0.0039  | 0.2406*  | 0.0129           | 0.0051              | -0.0284        | -0.0179  | -0.0098 | -0.0007       | -0.0137   | 0.0113        | 0.0231             |

| Biochemical Name                | Time Point | SIRS    | UCS      | SS      | SShock   | SNS     | <i>S. aureus</i> | <i>S. pneumonia</i> | <i>E. coli</i> | Gender   | Race     | Liver Disease | Hepatitis | Alcohol Abuse | Neoplastic Disease |
|---------------------------------|------------|---------|----------|---------|----------|---------|------------------|---------------------|----------------|----------|----------|---------------|-----------|---------------|--------------------|
| glucuronate                     | t0         | -0.0294 | -0.087   | 0.0479  | 0.0109   | 0.1072* | 0.0507           | 0.0022              | -0.0625        | -0.0538  | -0.0025  | 0.0918        | 0.0022    | -0.0345       | 0.0919             |
|                                 | t24        | N/D     | N/D      | N/D     | N/D      | N/D     | N/D              | N/D                 | N/D            | N/D      | N/D      | N/D           | N/D       | N/D           | N/D                |
| arabitol                        | t0         | 0.0268  | -0.0637  | -0.0105 | 0.0257   | 0.4779* | 0.0021           | 0.0106              | -0.0221        | -0.0408  | -0.0177  | 0.0004        | 0.1146*   | -0.0292       | 0.0618             |
|                                 | t24        | 0.0528  | -0.1020* | 0.0042  | -0.0115  | 0.4375* | 0.0047           | 0.0014              | -0.0153        | 0.0195   | -0.0254  | 0.0489        | 0.0029    | -0.0433       | 0.0061             |
| threitol                        | t0         | 0.006   | -0.1353* | -0.0126 | 0.0039   | 0.1640* | 0.0184           | -0.0389             | -0.015         | -0.0332  | -0.0473  | -0.0118       | -0.0077   | -0.0547       | 0.0996             |
|                                 | t24        | 0.065   | -0.0504  | -0.0182 | -0.0034  | 0.3093* | -0.0023          | -0.0478             | -0.0201        | 0.0417   | -0.0385  | 0.0107        | 0.0057    | -0.0233       | -0.0055            |
| gluconate                       | t0         | -0.005  | -0.0663  | -0.0123 | 0.0594   | 0.0222  | 0.0007           | -0.0359             | -0.0118        | -0.0769  | -0.04    | -0.0367       | -0.0136   | -0.0519       | 0.0644             |
|                                 | t24        | -0.0001 | 0.0008   | -0.0132 | 0.3263*  | -0.0117 | -0.0054          | 0.0902              | -0.0053        | 0.0137   | -0.0103  | 0.0044        | -0.0941   | -0.0214       | 0.0054             |
| arabinose                       | t0         | -0.0171 | -0.0687  | 0.0015  | 0.0239   | 0.0909  | -0.0131          | -0.036              | -0.0087        | 0.0002   | -0.0596  | -0.0235       | -0.0108   | -0.03         | 0.1417*            |
|                                 | t24        | 0.0149  | -0.2086* | 0.0034  | -0.007   | 0.0555  | 0.0206           | -0.0435             | -0.0134        | -0.0058  | -0.0068  | 0.003         | -0.0129   | -0.0138       | 0.1120*            |
| xylose                          | t0         | 0.0142  | -0.047   | -0.0021 | 0.0265   | 0.0042  | -0.0059          | -0.0295             | -0.0131        | 0.024    | -0.0196  | -0.0309       | -0.0119   | -0.0253       | 0.0239             |
|                                 | t24        | 0.0261  | 0.0049   | -0.0362 | -0.0894  | 0.013   | -0.0188          | -0.0395             | -0.0168        | 0.0879   | -0.0053  | -0.0117       | -0.0101   | -0.0295       | -0.0229            |
| xylonate                        | t0         | 0.0038  | -0.0755  | 0.0083  | 0.0187   | 0.5422* | -0.0102          | 0.0121              | -0.0113        | -0.0986  | -0.0315  | -0.0128       | 0.0105    | -0.0295       | 0.1137*            |
|                                 | t24        | 0.0566  | -0.0391  | -0.0077 | -0.015   | 0.4066* | 0.0095           | -0.011              | -0.0274        | -0.0077  | -0.0077  | 0.0175        | -0.0056   | -0.0189       | 0.0742             |
| citrate                         | t0         | 0.0396  | -0.0555  | -0.0504 | -0.0083  | 0.0824  | -0.066           | -0.0222             | -0.0065        | 0.0536   | -0.0076  | 0.3900*       | -0.0033   | -0.0222       | -0.0149            |
|                                 | t24        | 0.2088* | -0.0167  | -0.07   | -0.0364  | 0.0397  | -0.0137          | -0.0077             | 0.0099         | 0.0571   | -0.0223  | 0.4830*       | -0.0016   | 0.0003        | -0.0017            |
| alpha-ketoglutarate             | t0         | -0.0182 | -0.0608  | 0.0082  | 0.0044   | 0.1381* | 0.0063           | 0.01                | -0.006         | 0.0538   | -0.0329  | 0.4050*       | -0.0144   | -0.0476       | -0.0425            |
|                                 | t24        | -0.0087 | -0.0604  | 0.006   | -0.0055  | 0.045   | 0.0236           | -0.0084             | -0.0032        | 0.0556   | -0.0469  | 0.3938*       | -0.005    | -0.0203       | -0.0095            |
| malate                          | t0         | 0.017   | -0.0727  | -0.004  | -0.0069  | 0.3340* | -0.0144          | 0.0202              | -0.037         | 0.0585   | -0.1625* | 0.0194        | -0.0334   | -0.0082       | 0.0078             |
|                                 | t24        | 0.0587  | -0.1034* | -0.0494 | -0.0062  | 0.1841* | -0.0166          | 0.0123              | -0.0305        | 0.02     | -0.1093* | 0.0515        | -0.032    | -0.0138       | 0.02               |
| oxaloacetate                    | t0         | -0.0775 | -0.082   | 0.005   | 0.1047*  | 0.2628* | -0.0294          | -0.0004             | -0.0428        | -0.0466  | 0.0053   | 0.0338        | -0.0389   | -0.002        | 0.016              |
|                                 | t24        | -0.0515 | -0.0557  | -0.0049 | 0.0165   | 0.0442  | -0.0093          | -0.0071             | -0.0441        | -0.0039  | 0.0041   | -0.0003       | -0.0434   | 0.0173        | -0.0017            |
| phosphate                       | t0         | 0.1041* | -0.1679* | 0.0048  | -0.1020* | 0.0802  | -0.0064          | -0.0007             | -0.066         | 0.0139   | 0.0107   | -0.001        | -0.0179   | -0.0056       | 0.0593             |
|                                 | t24        | -0.0007 | -0.2028* | -0.0003 | -0.0158  | 0.1289* | 0.0133           | 0.0147              | -0.0116        | 0.0415   | -0.0132  | 0.0334        | -0.0035   | -0.1911*      | 0.0177             |
| linolenate (18:3n3 or 3n6)      | t0         | 0.0077  | -0.0121  | -0.0153 | -0.0101  | 0.0215  | -0.0277          | 0.0401              | 0.4568*        | -0.0047  | 0.0026   | 0.0219        | -0.0043   | 0.0274        | -0.0076            |
|                                 | t24        | 0.0456  | -0.0239  | 0.014   | -0.0156  | -0.001  | -0.0658          | 0.0161              | -0.0071        | 0.0071   | 0.0189   | 0.1258*       | -0.0261   | 0.0316        | 0.2086*            |
| dihomolinenate (20:3n3 or 3n6)  | t0         | 0.0266  | 0.0066   | -0.0477 | -0.0083  | 0.0065  | -0.0358          | -0.0143             | 0.4510*        | -0.0558  | 0.0284   | 0.0105        | -0.0047   | 0.0266        | -0.0164            |
|                                 | t24        | 0.0357  | -0.0042  | 0.0429  | -0.0196  | -0.0334 | -0.0697          | -0.1008*            | 0.0033         | -0.0015  | 0.0312   | 0.1476*       | -0.0152   | 0.0455        | 0.1719*            |
| eicosapentaenoate (EPA; 20:5n3) | t0         | -0.0045 | 0.0034   | -0.0135 | -0.0051  | 0.0659  | -0.0381          | -0.0126             | 0.0613         | -0.0973  | -0.006   | -0.0037       | -0.0116   | -0.0031       | 0.0459             |
|                                 | t24        | 0.0002  | -0.0067  | 0.0166  | -0.0118  | 0.0313  | -0.0301          | -0.0347             | 0.0112         | -0.0621  | -0.0071  | 0.0124        | -0.0157   | 0.0012        | 0.1672*            |
| docosapentaenoate (DPA; 22:5n3) | t0         | 0.0268  | -0.0689  | -0.0151 | -0.0141  | 0.082   | -0.0365          | -0.0097             | 0.2894*        | -0.0195  | -0.0378  | 0.0097        | -0.0236   | 0.0187        | 0.0115             |
|                                 | t24        | 0.0033  | -0.0229  | 0.0128  | -0.0383  | 0.0394  | -0.0468          | -0.0066             | 0.0175         | -0.0123  | 0.0009   | 0.0369        | -0.0461   | 0.0401        | 0.2174*            |
| docosahexaenoate (DHA; 22:6n3)  | t0         | 0.0498  | -0.0306  | -0.0116 | -0.0539  | 0.0415  | -0.1008*         | -0.03               | 0.2367*        | -0.0518  | -0.0055  | 0.0317        | -0.0442   | 0.0181        | -0.0224            |
|                                 | t24        | 0.0374  | -0.0193  | 0.0406  | -0.1006* | -0.0211 | -0.0652          | -0.0454             | 0.0575         | -0.0333  | -0.0113  | 0.0138        | -0.0532   | 0.0448        | 0.0419             |
| isovalerate (C5)                | t0         | 0.0745  | -0.0168  | 0.0152  | -0.0565  | 0.0001  | -0.0168          | 0.0012              | -0.0003        | -0.0217  | 0.024    | -0.0178       | 0.0173    | 0.1200*       | 0.0028             |
|                                 | t24        | N/D     | N/D      | N/D     | N/D      | N/D     | N/D              | N/D                 | N/D            | N/D      | N/D      | N/D           | N/D       | N/D           | N/D                |
| caproate (6:0)                  | t0         | -0.0046 | 0.1047*  | 0.0117  | -0.0422  | -0.0151 | 0.02             | 0.0038              | 0.1590*        | -0.036   | 0.1252*  | -0.0125       | -0.0144   | -0.039        | -0.0034            |
|                                 | t24        | -0.0167 | 0.0373   | 0.0078  | -0.0099  | -0.0206 | 0.4943*          | -0.0073             | 0.0037         | 0.0113   | 0.0671   | -0.0109       | 0.0065    | -0.0229       | -0.0322            |
| heptanoate (7:0)                | t0         | -0.0063 | 0.0767   | 0.0145  | -0.0565  | -0.0022 | 0.0019           | -0.0082             | 0.0273         | -0.1719* | 0.2289*  | -0.0236       | -0.0131   | -0.065        | -0.0112            |
|                                 | t24        | -0.0204 | 0.1010*  | 0.0058  | -0.0163  | -0.0605 | 0.3379*          | -0.0138             | -0.01          | -0.0017  | 0.0568   | -0.0027       | 0.0113    | -0.0393       | -0.0305            |
| caprylate (8:0)                 | t0         | -0.0277 | -0.012   | -0.0035 | -0.0052  | 0.1019* | -0.0112          | -0.0101             | -0.0052        | -0.0357  | -0.0174  | -0.0089       | -0.002    | -0.0078       | 0.1415*            |
|                                 | t24        | -0.0597 | 0.0582   | -0.0061 | -0.007   | 0.0145  | 0.073            | -0.022              | -0.007         | -0.0018  | 0.0267   | 0.0369        | -0.004    | -0.0683       | -0.0033            |
| pelargonate (9:0)               | t0         | 0.0104  | 0.0308   | 0.03    | -0.0341  | -0.0233 | -0.0281          | 0.0071              | 0.1105*        | -0.1845* | 0.2035*  | -0.0238       | 0.0072    | -0.0258       | -0.0938            |
|                                 | t24        | 0.0008  | 0.2203*  | 0.0579  | -0.0253  | -0.0697 | 0.2505*          | 0.0068              | 0.0059         | 0.0011   | 0.0928   | 0.0106        | 0.0172    | -0.0262       | -0.0234            |
| caprate (10:0)                  | t0         | -0.0314 | -0.0181  | -0.0037 | -0.0282  | 0.4455* | -0.0104          | 0.0001              | 0.0418         | -0.0696  | 0.1191*  | 0.003         | 0.0055    | 0.022         | 0.0119             |
|                                 | t24        | -0.0315 | 0.0214   | 0.0051  | -0.0198  | 0.0514  | 0.0116           | -0.0137             | 0.0061         | -0.0004  | 0.0702   | 0.1796*       | -0.0153   | -0.0193       | 0.0251             |
| laurate (12:0)                  | t0         | -0.0515 | 0.0369   | 0.0057  | -0.0297  | 0.0527  | -0.0344          | 0.0387              | 0.055          | -0.0227  | 0.0597   | 0.0393        | -0.0038   | 0.0667        | 0.0054             |
|                                 | t24        | -0.0099 | 0.0095   | 0.0053  | -0.0042  | 0.0028  | -0.0286          | 0.0238              | 0.0104         | 0.0238   | 0.1524*  | 0.2282*       | -0.019    | 0.0383        | 0.0379             |
| 5-dodecenoate (12:1n7)          | t0         | -0.048  | 0.0104   | 0.0041  | -0.0237  | 0.0907  | -0.0247          | 0.0106              | 0.0369         | 0.0108   | 0.1831*  | 0.2068*       | 0.0246    | 0.0047        | -0.0387            |
|                                 | t24        | -0.0061 | 0.0018   | 0.0148  | -0.0117  | 0.0022  | 0.0024           | 0.0431              | -0.0136        | -0.0085  | 0.0277   | 0.4138*       | -0.0007   | -0.0083       | -0.0203            |

| Biochemical Name             | Time Point | SIRS    | UCS     | SS      | SShock   | SNS     | <i>S. aureus</i> | <i>S. pneumonia</i> | <i>E. coli</i> | Gender   | Race     | Liver Disease | Hepatitis | Alcohol Abuse | Neoplastic Disease |
|------------------------------|------------|---------|---------|---------|----------|---------|------------------|---------------------|----------------|----------|----------|---------------|-----------|---------------|--------------------|
| myristate (14:0)             | t0         | -0.0405 | -0.0205 | 0.0204  | -0.0056  | 0.1001* | -0.067           | 0.1083*             | 0.1072*        | -0.0185  | -0.0041  | 0.0425        | -0.0235   | 0.0607        | 0.0087             |
|                              | t24        | -0.0023 | -0.0394 | 0.0339  | -0.0108  | 0.0069  | -0.0434          | 0.0575              | -0.0113        | 0.0072   | 0.0306   | 0.2955*       | -0.0274   | 0.045         | 0.1475*            |
| myristoleate (14:1n5)        | t0         | -0.0158 | -0.0109 | 0.0189  | -0.0113  | 0.0206  | -0.0758          | 0.0546              | 0.0134         | 0.0152   | 0.1073*  | 0.2939*       | 0.0327    | 0.0551        | 0.0021             |
|                              | t24        | -0.0027 | -0.0475 | 0.0028  | -0.0006  | 0.024   | -0.0594          | 0.0208              | -0.0149        | 0.0336   | 0.069    | 0.4565*       | 0.0034    | 0.0268        | 0.0721             |
| palmitate (16:0)             | t0         | -0.038  | -0.0198 | -0.0051 | 0.0119   | 0.1580* | -0.1628*         | 0.0336              | 0.2080*        | 0.0018   | -0.0328  | 0.0096        | -0.0096   | 0.0454        | -0.0214            |
|                              | t24        | -0.0038 | -0.0263 | 0.0155  | -0.0016  | 0.0083  | -0.0943          | 0.0359              | -0.011         | 0.0081   | 0.0085   | 0.1159*       | -0.015    | 0.0123        | 0.1148*            |
| palmitoleate (16:1n7)        | t0         | -0.0231 | -0.0232 | -0.0002 | 0.0102   | 0.0454  | -0.1051*         | 0.0071              | 0.0277         | 0.0194   | 0.051    | 0.1240*       | 0.0033    | 0.0126        | -0.0157            |
|                              | t24        | -0.0046 | -0.0294 | 0.0082  | 0.0067   | 0.0387  | -0.067           | 0.0145              | -0.0243        | 0.0221   | 0.0602   | 0.4279*       | -0.0148   | -0.0056       | 0.0583             |
| margarate (17:0)             | t0         | -0.005  | -0.0085 | -0.0331 | 0.0018   | 0.0714  | -0.0326          | 0.0101              | 0.4080*        | -0.163   | -0.0922  | -0.0163       | -0.0185   | 0.0506        | 0.0035             |
|                              | t24        | 0.0016  | -0.035  | 0.0426  | 0.0008   | 0.0013  | -0.0085          | 0.0362              | -0.0268        | -0.0015  | -0.0262  | 0.0376        | -0.014    | 0.0187        | 0.3400*            |
| 10-heptadecenoate (17:1n7)   | t0         | -0.0136 | -0.0538 | -0.0114 | 0.0146   | 0.1454* | -0.1182*         | 0.0048              | 0.2887*        | -0.0205  | 0.0015   | 0.0335        | -0.001    | 0.043         | -0.0146            |
|                              | t24        | 0.0001  | -0.0319 | 0.0094  | -0.0007  | 0.0161  | -0.0371          | 0.0257              | -0.0162        | -0.0014  | 0.0253   | 0.2913*       | -0.0203   | 0.0043        | 0.2596*            |
| stearate (18:0)              | t0         | -0.0115 | 0.0014  | -0.0348 | 0.0019   | 0.0436  | -0.0492          | -0.0016             | 0.2551*        | 0.0042   | -0.1065* | -0.0168       | -0.0024   | 0.0731        | -0.0153            |
|                              | t24        | 0.0012  | -0.0192 | 0.0089  | -0.0062  | 0.0122  | -0.0274          | 0.016               | -0.0005        | 0.0103   | -0.0375  | 0.0702        | -0.0128   | 0.0124        | 0.1822*            |
| oleate (18:1n9)              | t0         | -0.0145 | -0.0284 | -0.0204 | 0.0142   | 0.1441* | -0.0408          | -0.0012             | 0.1126*        | 0.0071   | -0.0264  | 0.0318        | -0.055    | 0.1841*       | -0.0031            |
|                              | t24        | -0.023  | -0.0244 | -0.0032 | 0.0006   | 0.0469  | -0.0231          | 0.0202              | -0.0291        | 0.0017   | 0.0484   | 0.2783*       | -0.0022   | 0.0271        | 0.0817             |
| vaccenate (18:1n7)           | t0         | 0.0138  | -0.0018 | 0.0193  | 0.0304   | -0.0641 | -0.0402          | -0.0143             | 0.0141         | 0.0273   | 0.0519   | -0.0549       | -0.0357   | -0.0265       | -0.0632            |
|                              | t24        | N/D     | N/D     | N/D     | N/D      | N/D     | N/D              | N/D                 | N/D            | N/D      | N/D      | N/D           | N/D       | N/D           | N/D                |
| linoleate (18:2n6)           | t0         | 0.0029  | -0.0226 | -0.0222 | -0.012   | 0.0708  | -0.0647          | 0.0036              | 0.3949*        | 0.0009   | -0.0146  | 0.0035        | -0.0074   | 0.0666        | -0.0061            |
|                              | t24        | 0.0138  | -0.0179 | 0.0132  | -0.0151  | 0.0097  | -0.0678          | 0.0049              | -0.0112        | 0.0094   | 0.0504   | 0.1150*       | -0.0364   | 0.0378        | 0.1318*            |
| stearidonate (18:4n3)        | t0         | -0.0142 | 0       | -0.0163 | -0.0074  | 0.1269* | -0.0148          | -0.0151             | 0.0156         | -0.0259  | -0.001   | 0.0044        | -0.0038   | -0.0079       | 0.0776             |
|                              | t24        | -0.002  | -0.0175 | -0.0259 | -0.0332  | 0.1207* | -0.0156          | -0.0102             | -0.0136        | 0.0082   | 0.0067   | 0.0645        | -0.0147   | -0.0178       | 0.1472*            |
| nonadecanoate (19:0)         | t0         | N/D     | N/D     | N/D     | N/D      | N/D     | N/D              | N/D                 | N/D            | N/D      | N/D      | N/D           | N/D       | N/D           | N/D                |
|                              | t24        | 0.0352  | -0.0314 | -0.0633 | -0.0077  | 0.0326  | 0.0147           | 0.0163              | -0.0169        | -0.0357  | -0.0033  | 0.0481        | 0.0234    | 0.0733        | 0.2685*            |
| 10-nonadecenoate (19:1n9)    | t0         | 0.0146  | -0.0118 | -0.0233 | -0.013   | 0.2477* | -0.1305*         | -0.0567             | 0.2150*        | 0.0061   | -0.0017  | 0.0149        | -0.0167   | 0.0073        | 0.0063             |
|                              | t24        | -0.0073 | -0.0289 | 0.01    | -0.0135  | 0.0135  | -0.0467          | 0.0004              | -0.0201        | 0.015    | 0.0039   | 0.2177*       | -0.021    | 0.0228        | 0.2535*            |
| eicosenoate (20:1n9 or 1n11) | t0         | 0.0007  | -0.0054 | -0.0294 | -0.0231  | 0.1649* | -0.0539          | -0.011              | 0.3267*        | -0.0066  | -0.0079  | 0.0273        | -0.07     | 0.2674*       | 0.0065             |
|                              | t24        | 0.0121  | -0.0343 | 0.0131  | -0.0093  | 0.0207  | -0.0263          | -0.0271             | -0.0148        | -0.0021  | 0.0172   | 0.1902*       | -0.0172   | 0.0819        | 0.1762*            |
| dihomolinoleate (20:2n6)     | t0         | 0.0377  | -0.0229 | -0.0375 | -0.0238  | 0.0334  | -0.0506          | -0.0189             | 0.4396*        | -0.004   | -0.019   | 0.0206        | -0.0437   | 0.2199*       | -0.0022            |
|                              | t24        | 0.0185  | -0.0303 | 0.0177  | -0.0166  | 0.0053  | -0.0435          | -0.0264             | -0.0012        | 0.0186   | 0.0076   | 0.2558*       | -0.0501   | 0.0726        | 0.1240*            |
| arachidonate (20:4n6)        | t0         | 0.0671  | -0.0138 | -0.0221 | 0.0024   | -0.0179 | -0.0146          | -0.0248             | 0.4311*        | -0.0224  | -0.0009  | -0.0027       | -0.0212   | 0.0187        | -0.0331            |
|                              | t24        | 0.0637  | -0.0032 | 0.0763  | -0.0542  | -0.0804 | -0.0368          | -0.1226*            | 0.0289         | 0.0198   | -0.028   | 0.043         | -0.0065   | -0.0007       | 0.0071             |
| adrenate (22:4n6)            | t0         | 0.016   | -0.0449 | -0.0179 | -0.0108  | 0.0565  | -0.0239          | -0.0299             | 0.3538*        | -0.0063  | -0.0738  | 0.0165        | -0.0416   | 0.1101*       | -0.0289            |
|                              | t24        | 0.029   | -0.0241 | 0.0064  | -0.0225  | 0.0091  | -0.0247          | -0.041              | -0.0011        | 0.0177   | 0.0013   | 0.1396*       | -0.0421   | 0.1405*       | 0.0734             |
| 3-hydroxydecanoate           | t0         | N/D     | N/D     | N/D     | N/D      | N/D     | N/D              | N/D                 | N/D            | N/D      | N/D      | N/D           | N/D       | N/D           | N/D                |
|                              | t24        | -0.001  | -0.0158 | -0.0117 | -0.0122  | 0.2399* | -0.0345          | 0.0388              | -0.0124        | -0.0242  | -0.0206  | 0.2685*       | -0.0002   | 0.0269        | 0.0208             |
| 2-hydroxystearate            | t0         | 0.0051  | 0.1206* | -0.0078 | -0.0293  | -0.0044 | -0.0735          | 0.025               | 0.0861         | -0.1625* | 0.0221   | 0.0361        | 0.0165    | -0.0252       | -0.0177            |
|                              | t24        | 0.0555  | 0.0142  | 0.0182  | -0.0531  | -0.0191 | -0.0649          | -0.015              | 0.0177         | -0.003   | -0.1428* | 0.1627*       | 0.0007    | -0.0083       | 0.0279             |
| 2-hydroxypalmitate           | t0         | -0.0078 | -0.0089 | 0.0068  | -0.0212  | 0.1387* | -0.0888          | 0.0534              | 0.0196         | -0.1057* | -0.0221  | 0.0691        | -0.0241   | -0.0175       | -0.0081            |
|                              | t24        | 0.0104  | -0.0033 | 0.0093  | -0.0295  | -0.0023 | -0.045           | -0.0335             | -0.0024        | -0.0279  | -0.3026* | 0.2533*       | -0.0136   | -0.0113       | 0.0914             |
| hexadecanedioate (C16)       | t0         | -0.028  | 0.003   | -0.0101 | -0.0189  | 0.1843* | -0.0271          | 0.0136              | -0.0036        | 0.0501   | 0.0094   | 0.4954*       | -0.0217   | 0.0094        | -0.0076            |
|                              | t24        | -0.0178 | 0.0012  | -0.021  | -0.0007  | 0.2706* | -0.0164          | 0.0117              | -0.0135        | -0.0085  | -0.023   | 0.5520*       | -0.0045   | 0.0238        | 0.0164             |
| octadecanedioate (C18)       | t0         | 0.0071  | -0.0058 | -0.0028 | -0.0344  | 0.2007* | -0.0074          | 0.0301              | -0.0059        | 0.0379   | -0.0398  | 0.5036*       | -0.0334   | 0.0926        | -0.0279            |
|                              | t24        | -0.005  | -0.0011 | -0.016  | -0.0013  | 0.1263* | -0.0287          | 0.001               | -0.0062        | -0.0131  | -0.0311  | 0.4906*       | -0.0093   | 0.0257        | 0.0032             |
| CMPF                         | t0         | -0.002  | -0.004  | 0.0114  | -0.0001  | 0.0044  | -0.0771          | 0.009               | 0.0418         | -0.0586  | 0.0178   | -0.0291       | -0.0342   | -0.0341       | -0.0056            |
|                              | t24        | 0.0283  | -0.0187 | 0.0131  | -0.0167  | -0.0119 | -0.0401          | -0.0048             | 0.0184         | -0.0458  | 0.0554   | -0.013        | -0.0201   | -0.044        | -0.0066            |
| deoxycarnitine               | t0         | 0.0005  | -0.0521 | 0.0462  | -0.1591* | 0.1159* | 0.0056           | 0.0753              | -0.0318        | -0.0933  | -0.0333  | -0.0064       | -0.015    | 0.0661        | 0.0228             |
|                              | t24        | -0.0054 | -0.0183 | 0.0097  | 0.0212   | -0.0062 | -0.0263          | -0.0047             | -0.0178        | -0.0738  | -0.0009  | -0.0025       | -0.0332   | -0.014        | -0.0021            |
| carnitine                    | t0         | 0.0096  | -0.0445 | 0.0182  | -0.2325* | 0.0448  | 0.0066           | 0.0799              | -0.0315        | -0.0015  | -0.0582  | -0.0443       | -0.011    | -0.0197       | -0.0296            |
|                              | t24        | 0.0042  | -0.013  | 0.0216  | -0.0205  | 0.0012  | -0.0227          | 0.0689              | 0.0008         | -0.0002  | -0.0733  | 0.0012        | -0.0445   | -0.0461       | -0.0496            |

| Biochemical Name               | Time Point | SIRS     | UCS     | SS      | SShock  | SNS      | <i>S. aureus</i> | <i>S. pneumonia</i> | <i>E. coli</i> | Gender  | Race     | Liver Disease | Hepatitis | Alcohol Abuse | Neoplastic Disease |
|--------------------------------|------------|----------|---------|---------|---------|----------|------------------|---------------------|----------------|---------|----------|---------------|-----------|---------------|--------------------|
| 3-dehydrocarnitine             | t0         | -0.0146  | 0.0018  | 0.0099  | -0.0249 | 0.0757   | 0.0119           | 0.0222              | -0.0483        | 0.1326* | -0.0202  | -0.0325       | -0.0158   | 0.0075        | -0.0055            |
|                                | t24        | -0.086   | -0.0327 | -0.0061 | 0.0414  | 0.072    | 0.0337           | 0.0017              | 0.0008         | 0.2250* | -0.0522  | 0.0139        | 0.0061    | 0.0028        | -0.0337            |
| acetylcarnitine (C2)           | t0         | 0.0685   | -0.0438 | -0.0149 | -0.0144 | 0.4309*  | -0.0236          | 0.0194              | -0.004         | 0.0439  | -0.1967* | -0.0027       | -0.0344   | 0.0334        | 0.007              |
|                                | t24        | 0.0051   | -0.0991 | 0.0086  | 0.008   | 0.4201*  | -0.0254          | 0.0201              | -0.0065        | 0.0082  | -0.0296  | 0.0103        | -0.0225   | 0.0138        | 0.0248             |
| glutaryl carnitine (C5)        | t0         | 0.0052   | -0.0081 | -0.0111 | -0.0033 | 0.0258   | -0.0375          | -0.0091             | 0.0211         | -0.098  | 0.056    | -0.0086       | 0.4456*   | -0.0756       | 0.0161             |
|                                | t24        | 0.0141   | -0.0092 | -0.039  | 0.005   | 0.0301   | -0.0029          | -0.0581             | 0.0263         | -0.054  | 0.0739   | 0.0044        | 0.0239    | -0.0193       | 0.0589             |
| methylglutaryl carnitine (C6)  | t0         | -0.1487* | 0.0085  | 0.0119  | 0.0011  | 0.2336*  | -0.0266          | -0.0054             | -0.0016        | -0.0308 | -0.0044  | -0.1052*      | -0.0397   | -0.0007       | 0.0564             |
|                                | t24        | -0.0931  | -0.0177 | 0.0072  | 0.0153  | 0.2049*  | -0.0464          | 0.023               | -0.0285        | 0.0308  | 0.0065   | -0.0092       | -0.0307   | -0.0244       | -0.0008            |
| succinoylcarnitine (C4)        | t0         | -0.0701  | 0.0053  | -0.0175 | 0.0524  | 0.2291*  | -0.0207          | 0.0754              | -0.0464        | -0.0452 | 0.0093   | -0.0564       | 0.0217    | -0.0425       | 0.0377             |
|                                | t24        | 0.0289   | -0.0152 | -0.0258 | -0.0059 | 0.0154   | -0.0328          | -0.0048             | -0.043         | -0.0259 | 0.0167   | -0.0164       | -0.0333   | 0.0183        | -0.0184            |
| hexanoylcarnitine (C6)         | t0         | 0.005    | -0.0141 | 0.0539  | -0.0141 | 0.5756*  | -0.0119          | 0.0998              | 0.0039         | 0.0155  | -0.0978  | -0.0137       | -0.0239   | 0.0417        | 0.0046             |
|                                | t24        | -0.0491  | -0.0635 | 0.0042  | 0.0195  | 0.4745*  | -0.0152          | 0.0434              | -0.0111        | 0.0003  | -0.0203  | 0.0097        | -0.0298   | -0.0193       | 0.0201             |
| octanoylcarnitine (C8)         | t0         | 0.0203   | -0.0405 | 0.0058  | -0.0255 | 0.5042*  | 0.0027           | 0.0141              | -0.0082        | 0.0007  | -0.0767  | -0.0488       | -0.009    | 0.0181        | 0.0094             |
|                                | t24        | -0.0102  | -0.0315 | 0.0024  | 0.0123  | 0.4203*  | -0.0023          | -0.0037             | -0.0034        | 0.0151  | -0.0268  | -0.0139       | -0.028    | -0.016        | -0.0007            |
| 2-octenoylcarnitine (C8)       | t0         | N/D      | N/D     | N/D     | N/D     | N/D      | N/D              | N/D                 | N/D            | N/D     | N/D      | N/D           | N/D       | N/D           | N/D                |
|                                | t24        | -0.0223  | -0.0179 | -0.0343 | 0.0199  | 0.3175*  | -0.0018          | -0.0044             | -0.0141        | -0.0118 | -0.02    | -0.0258       | -0.0097   | -0.0249       | 0.0487             |
| decanoylcarnitine (C10)        | t0         | 0.071    | -0.0467 | 0.0111  | -0.0237 | 0.4717*  | 0.0078           | -0.0095             | -0.0192        | 0.0025  | -0.0706  | -0.0604       | -0.012    | 0.0138        | 0.0011             |
|                                | t24        | -0.0022  | -0.0316 | 0.0095  | -0.0047 | 0.3244*  | 0.0093           | -0.0108             | -0.0041        | 0.0555  | -0.0124  | -0.0121       | -0.0393   | -0.0298       | -0.0071            |
| laurylcarnitine (C12)          | t0         | 0.0993   | -0.0138 | -0.0152 | -0.0622 | 0.1564*  | -0.0161          | -0.0103             | -0.023         | 0.0878  | -0.0804  | -0.0422       | -0.0093   | -0.0053       | -0.0481            |
|                                | t24        | 0.0665   | -0.0286 | -0.0072 | -0.0421 | 0.2242*  | 0.0128           | -0.0019             | -0.008         | 0.0023  | -0.0222  | -0.0302       | -0.0133   | -0.0265       | -0.0057            |
| palmitoylcarnitine (C16)       | t0         | 0.0532   | -0.0039 | -0.0144 | -0.0245 | 0.2476*  | -0.0063          | -0.0449             | -0.0151        | 0.1498* | -0.0368  | -0.0246       | -0.0288   | -0.0072       | -0.1574*           |
|                                | t24        | 0.0232   | -0.0077 | -0.0334 | -0.0201 | 0.0404   | 0.0202           | -0.0412             | -0.0126        | 0.0751  | -0.0293  | 0.0131        | -0.0319   | -0.0018       | -0.0579            |
| cholate                        | t0         | N/D      | N/D     | N/D     | N/D     | N/D      | N/D              | N/D                 | N/D            | N/D     | N/D      | N/D           | N/D       | N/D           | N/D                |
|                                | t24        | -0.042   | -0.0047 | 0.0133  | -0.0087 | 0.071    | -0.0034          | 0.0042              | -0.0009        | -0.0546 | -0.0269  | -0.0056       | -0.0037   | 0.0052        | 0.3308*            |
| glycocholate                   | t0         | -0.0123  | -0.0226 | 0.0514  | 0.025   | -0.0343  | 0.0537           | -0.0081             | -0.0058        | -0.0377 | 0.0162   | 0.6283*       | 0.0036    | -0.0025       | 0.0124             |
|                                | t24        | -0.0316  | -0.0238 | 0.0953  | 0.0177  | -0.0187  | 0.1505*          | -0.0156             | -0.0047        | -0.0114 | 0.025    | 0.4337*       | -0.0018   | 0.0083        | 0.0006             |
| taurocholate                   | t0         | 0.0036   | -0.0049 | 0.2401* | -0.0019 | -0.0212  | 0.0406           | 0.0356              | -0.0103        | -0.0385 | 0.0055   | 0.5391*       | 0.0097    | -0.0106       | 0.0021             |
|                                | t24        | -0.0151  | -0.0029 | 0.2305* | -0.0038 | -0.0037  | 0.0784           | 0.011               | -0.0022        | -0.0183 | 0.0079   | 0.5908*       | 0.0099    | 0.0039        | 0.0024             |
| taurochenodeoxycholate         | t0         | 0.002    | 0.0029  | -0.0005 | 0.006   | 0.0003   | -0.0267          | 0.0293              | -0.0085        | -0.0048 | 0.0075   | 0.8680*       | 0.0343    | 0.0043        | -0.0016            |
|                                | t24        | -0.028   | 0.0043  | 0.0009  | -0.006  | 0.0691   | -0.0107          | 0.0076              | -0.0085        | 0.0284  | 0.0111   | 0.7115*       | 0.0011    | 0.0006        | -0.0067            |
| ursodeoxycholate               | t0         | N/D      | N/D     | N/D     | N/D     | N/D      | N/D              | N/D                 | N/D            | N/D     | N/D      | N/D           | N/D       | N/D           | N/D                |
|                                | t24        | 0.003    | -0.0125 | 0.1368* | 0.0049  | -0.0194  | 0.1764*          | -0.0052             | -0.0014        | 0.0014  | 0.0309   | 0.3915*       | 0.002     | -0.0134       | 0.0205             |
| hyodeoxycholate                | t0         | N/D      | N/D     | N/D     | N/D     | N/D      | N/D              | N/D                 | N/D            | N/D     | N/D      | N/D           | N/D       | N/D           | N/D                |
|                                | t24        | 0.0204   | -0.0381 | -0.0165 | 0.0016  | 0.0179   | -0.0096          | -0.028              | -0.0016        | 0.1477* | -0.0234  | -0.0352       | -0.0059   | -0.0279       | -0.0689            |
| deoxycholate                   | t0         | -0.0014  | 0.1442* | -0.0147 | 0.0078  | -0.0243  | -0.0093          | 0.0233              | -0.0307        | 0.0051  | -0.0049  | -0.0249       | -0.002    | -0.0257       | 0.0841             |
|                                | t24        | N/D      | N/D     | N/D     | N/D     | N/D      | N/D              | N/D                 | N/D            | N/D     | N/D      | N/D           | N/D       | N/D           | N/D                |
| glycodeoxycholate              | t0         | N/D      | N/D     | N/D     | N/D     | N/D      | N/D              | N/D                 | N/D            | N/D     | N/D      | N/D           | N/D       | N/D           | N/D                |
|                                | t24        | 0.0237   | -0.0007 | 0.0013  | 0.0121  | -0.0421  | 0.1387*          | -0.0041             | -0.022         | 0.0583  | -0.1721* | -0.0849       | 0.0239    | -0.0023       | -0.0444            |
| glycochenodeoxycholate         | t0         | 0.0118   | -0.0001 | -0.0146 | 0.0027  | -0.0021  | -0.0188          | -0.0065             | -0.0061        | 0.0052  | -0.0015  | 0.7536*       | 0.0045    | 0.0012        | 0.0162             |
|                                | t24        | -0.0319  | -0.0027 | -0.02   | 0.0008  | 0.0716   | -0.0048          | -0.0157             | -0.0112        | 0.015   | 0.0211   | 0.5044*       | -0.0064   | -0.0004       | 0.0015             |
| taurothiocholate 3-sulfate     | t0         | -0.0179  | -0.0129 | 0.0899  | 0.0383  | -0.045   | 0.0281           | 0.0895              | 0.0077         | -0.0052 | 0.0184   | 0.0229        | 0.0498    | 0.1050*       | -0.0363            |
|                                | t24        | -0.0175  | -0.018  | 0.1760* | 0.0275  | -0.0256  | 0.1138*          | 0.0211              | 0.0033         | 0.0036  | 0.0048   | 0.3198*       | 0.0284    | -0.0083       | -0.009             |
| glycerol                       | t0         | 0.0061   | -0.0895 | -0.0293 | 0.0145  | 0.0545   | -0.0179          | 0.0045              | 0.0296         | 0.1688* | -0.1563* | -0.0139       | -0.0306   | 0.014         | 0.2020*            |
|                                | t24        | 0.1038*  | -0.0786 | -0.0076 | -0.0449 | 0.0879   | -0.0197          | -0.0026             | -0.0193        | 0.0753  | 0.0175   | 0.0328        | -0.0206   | 0.0075        | 0.0079             |
| choline                        | t0         | -0.0299  | -0.0399 | 0.0115  | -0.0003 | 0.0803   | 0.0176           | -0.0134             | -0.0799        | 0.0014  | 0.0031   | -0.2919*      | -0.0063   | -0.035        | 0.0388             |
|                                | t24        | -0.027   | -0.0052 | 0.0965  | -0.041  | 0.0413   | -0.0012          | -0.041              | 0.0359         | -0.0152 | 0.019    | -0.4471*      | -0.0156   | -0.0429       | -0.0347            |
| glycerol 3-phosphate (G3P)     | t0         | 0.0526   | -0.0397 | 0.0042  | -0.0003 | -0.0199  | 0.0199           | -0.0072             | 0.0075         | 0.0315  | -0.006   | 0.0102        | -0.0292   | -0.0066       | 0.1036*            |
|                                | t24        | 0.0261   | 0.0109  | 0.0004  | -0.0371 | 0.0002   | 0.028            | 0.0563              | 0.0069         | 0.0269  | -0.0156  | 0.0018        | -0.0019   | -0.0157       | 0.0044             |
| glycerophosphorylcholine (GPC) | t0         | N/D      | N/D     | N/D     | N/D     | N/D      | N/D              | N/D                 | N/D            | N/D     | N/D      | N/D           | N/D       | N/D           | N/D                |
|                                | t24        | 0.0526   | 0.0896  | -0.0147 | -0.0113 | -0.1526* | 0.0121           | -0.0062             | 0.2709*        | 0.0468  | -0.0004  | -0.0077       | -0.0277   | -0.053        | -0.0262            |



| Biochemical Name                        | Time Point | SIRS     | UCS     | SS       | SShock   | SNS      | <i>S. aureus</i> | <i>S. pneumonia</i> | <i>E. coli</i> | Gender   | Race     | Liver Disease | Hepatitis | Alcohol Abuse | Neoplastic Disease |
|-----------------------------------------|------------|----------|---------|----------|----------|----------|------------------|---------------------|----------------|----------|----------|---------------|-----------|---------------|--------------------|
| myo-inositol                            | t0         | -0.0045  | -0.0598 | -0.0233  | 0.1254*  | 0.0385   | -0.0282          | 0.0254              | -0.02          | -0.0091  | -0.0751  | -0.0194       | -0.0306   | -0.0158       | 0.1421*            |
|                                         | t24        | -0.0047  | -0.0136 | -0.0241  | 0.2681*  | 0.0014   | -0.0117          | 0.087               | -0.0069        | 0.0181   | -0.0462  | -0.0051       | -0.0713   | -0.0432       | 0.016              |
| scyllo-inositol                         | t0         | -0.0015  | -0.0422 | -0.0186  | 0.005    | 0.2268*  | -0.0285          | -0.0096             | -0.0267        | 0.0124   | -0.0818  | -0.0226       | -0.0199   | -0.0225       | 0.0305             |
|                                         | t24        | -0.0139  | -0.0231 | -0.0178  | 0.1997*  | 0.017    | -0.0131          | 0.0388              | -0.0149        | 0.0425   | -0.0281  | 0.0139        | -0.062    | -0.0242       | -0.0032            |
| 3-hydroxybutyrate (BHBA)                | t0         | -0.0357  | 0.0218  | -0.0042  | 0.0881   | -0.0075  | 0.0435           | -0.0174             | 0.0178         | 0.0628   | 0.0194   | -0.0465       | -0.0274   | 0.03          | -0.0066            |
|                                         | t24        | -0.0502  | -0.0287 | 0.1298*  | 0.0023   | 0.0117   | -0.0088          | 0.0097              | -0.0334        | 0.0987   | 0.1862*  | -0.0126       | -0.0279   | 0.079         | 0.0267             |
| acetoacetate                            | t0         | -0.0544  | 0.0226  | 0.0043   | 0.0134   | 0.0085   | -0.0029          | -0.0218             | 0.1396*        | 0.0445   | 0.0454   | -0.0321       | -0.0151   | -0.0003       | 0.0035             |
|                                         | t24        | N/D      | N/D     | N/D      | N/D      | N/D      | N/D              | N/D                 | N/D            | N/D      | N/D      | N/D           | N/D       | N/D           | N/D                |
| 1-oleoylglycerophosphate (18:1)         | t0         | N/D      | N/D     | N/D      | N/D      | N/D      | N/D              | N/D                 | N/D            | N/D      | N/D      | N/D           | N/D       | N/D           | N/D                |
|                                         | t24        | 0.0082   | -0.0015 | 0.0306   | -0.0034  | -0.0933  | 0.0069           | -0.0644             | 0.019          | 0.0777   | 0.0013   | -0.01         | -0.0564   | -0.0552       | 0.0187             |
| 1-oleoyl-GPE (18:1)                     | t0         | 0.0054   | 0.0715  | -0.1478* | -0.0442  | 0.0413   | 0.0042           | 0.0005              | 0.0149         | -0.0151  | 0.078    | -0.0552       | -0.0098   | -0.0276       | -0.0151            |
|                                         | t24        | 0.1163*  | 0.0089  | -0.0316  | -0.0019  | -0.0787  | 0.0014           | -0.0679             | -0.0053        | 0.1634*  | 0.0142   | -0.0374       | -0.0017   | -0.015        | -0.0121            |
| 1-linoleoyl-GPE (18:2)                  | t0         | N/D      | N/D     | N/D      | N/D      | N/D      | N/D              | N/D                 | N/D            | N/D      | N/D      | N/D           | N/D       | N/D           | N/D                |
|                                         | t24        | 0.1830*  | 0.0022  | 0.0008   | -0.0026  | -0.061   | -0.0018          | -0.0119             | 0.0034         | 0.0704   | -0.0031  | -0.1005*      | -0.0099   | -0.1160*      | -0.0116            |
| 1-arachidoyl-GPE (20:4)                 | t0         | 0.0867   | 0.0007  | -0.0262  | -0.0111  | -0.0055  | 0.0078           | -0.0475             | 0.0776         | -0.0071  | 0.0067   | -0.1182*      | -0.0068   | -0.0214       | -0.0938            |
|                                         | t24        | 0.0733   | 0.0178  | 0.0012   | -0.0189  | -0.2246* | -0.0213          | -0.0117             | 0.0268         | 0.1523*  | -0.0382  | -0.1052*      | -0.0258   | -0.1290*      | -0.0139            |
| 1-myristoyl-GPC (14:0)                  | t0         | N/D      | N/D     | N/D      | N/D      | N/D      | N/D              | N/D                 | N/D            | N/D      | N/D      | N/D           | N/D       | N/D           | N/D                |
|                                         | t24        | 0.1482*  | 0.0257  | -0.0232  | -0.0367  | 0.0052   | 0.1031*          | 0.0058              | -0.0307        | -0.0262  | -0.0105  | -0.0215       | -0.0121   | -0.0719       | -0.0345            |
| 1-palmitoyl-GPC (16:0)                  | t0         | 0.1043*  | 0.0599  | -0.0058  | -0.1111* | -0.0324  | 0.0133           | -0.0093             | 0.0243         | 0.0148   | 0.012    | -0.0881       | -0.005    | -0.0388       | -0.0262            |
|                                         | t24        | 0.3310*  | 0.0084  | -0.0252  | 0.0165   | -0.055   | 0.0335           | -0.0174             | 0.02           | 0.0099   | 0.0239   | -0.0789       | -0.0219   | -0.0525       | -0.1171*           |
| 2-palmitoyl-GPC (16:0)                  | t0         | 0.0982   | 0.0159  | 0.0019   | -0.0537  | -0.0135  | 0.026            | 0.0031              | 0.0316         | -0.0007  | 0.017    | -0.0127       | 0.0091    | -0.0347       | -0.0169            |
|                                         | t24        | 0.2406*  | 0.0146  | -0.019   | -0.0187  | -0.0315  | 0.0374           | -0.0301             | 0.0588         | 0.0021   | -0.0094  | -0.048        | -0.0084   | -0.0525       | -0.0496            |
| 1-palmitoleoyl-GPC (16:1)               | t0         | 0.0781   | 0.0235  | -0.0098  | -0.0511  | -0.0345  | 0.0097           | 0.0094              | 0.0441         | 0.0153   | 0.0992   | -0.0302       | 0.0109    | -0.0517       | 0.0158             |
|                                         | t24        | 0.0175   | 0.0478  | -0.0021  | -0.0256  | -0.0603  | 0.0105           | 0.0101              | 0.014          | -0.0044  | 0.024    | -0.0456       | 0.0026    | -0.0941       | 0.0013             |
| 1-stearoyl-GPC (18:0)                   | t0         | 0.0511   | 0.2975* | -0.0073  | -0.0376  | -0.0156  | -0.0068          | 0.0072              | 0.0077         | 0.0344   | -0.0039  | -0.0337       | -0.0124   | -0.0246       | 0.0049             |
|                                         | t24        | 0.2536*  | 0.0804  | -0.035   | -0.0091  | -0.0662  | 0.0454           | 0.0049              | 0.0102         | 0.0377   | 0.0007   | -0.1026*      | -0.0023   | -0.0809       | -0.0475            |
| 2-stearoyl-GPC (18:0)                   | t0         | N/D      | N/D     | N/D      | N/D      | N/D      | N/D              | N/D                 | N/D            | N/D      | N/D      | N/D           | N/D       | N/D           | N/D                |
|                                         | t24        | 0.1058*  | 0.1023* | -0.0459  | -0.032   | -0.2385* | 0.0167           | -0.0314             | 0.0337         | 0.0305   | -0.0035  | -0.0546       | -0.0099   | -0.0387       | -0.03              |
| 1-oleoyl-GPC (18:1)                     | t0         | 0.0409   | 0.0226  | -0.0049  | -0.1259* | -0.0017  | -0.0111          | -0.0085             | 0.025          | 0.0045   | 0.0585   | -0.0507       | -0.0045   | -0.03         | -0.0182            |
|                                         | t24        | 0.2349*  | 0.0274  | -0.0385  | -0.001   | -0.0945  | 0.0055           | -0.0205             | 0.0312         | 0.0095   | 0.0198   | -0.0386       | -0.0362   | -0.0563       | -0.1524*           |
| 1-linoleoyl-GPC (18:2)                  | t0         | 0.0872   | 0.0207  | -0.0021  | -0.0864  | -0.0157  | 0.0081           | -0.0221             | 0.0391         | -0.0124  | 0.0783   | -0.0424       | -0.0012   | -0.0325       | -0.0113            |
|                                         | t24        | 0.2560*  | 0.041   | -0.055   | -0.0083  | -0.0584  | 0.0011           | -0.0046             | 0.0349         | -0.0025  | -0.0277  | -0.0229       | -0.0103   | -0.0502       | -0.0581            |
| 1-eicosatrienoyl-GPC (20:3)             | t0         | 0.0023   | 0.0095  | 0.014    | -0.0021  | -0.0199  | -0.0126          | -0.0021             | 0.0288         | -0.0301  | 0.1655*  | -0.0119       | 0.4295*   | -0.1391*      | 0.0048             |
|                                         | t24        | 0.0844   | 0.0216  | -0.0381  | 0.0591   | -0.1616* | 0.0049           | -0.0396             | -0.0003        | -0.0045  | 0.0534   | -0.0047       | -0.0025   | -0.0756       | -0.0353            |
| 1-arachidoyl-GPC* (20:4)                | t0         | 0.0783   | 0.0219  | 0.0026   | -0.0658  | -0.0195  | 0.0083           | -0.0524             | 0.1176*        | -0.0092  | 0.0127   | -0.0703       | -0.0123   | -0.0309       | -0.0094            |
|                                         | t24        | 0.0676   | 0.0517  | -0.0175  | 0.0031   | -0.1595* | -0.0004          | -0.0247             | 0.0463         | 0.0271   | 0.0032   | -0.0501       | -0.0152   | -0.1711*      | -0.0497            |
| 1-stearoyl-GPI (18:0)                   | t0         | -0.0317  | 0.017   | 0.0051   | -0.0031  | 0.0403   | 0.0082           | -0.006              | 0.2034*        | -0.1515* | 0.0134   | -0.0139       | -0.0052   | -0.011        | -0.0276            |
|                                         | t24        | N/D      | N/D     | N/D      | N/D      | N/D      | N/D              | N/D                 | N/D            | N/D      | N/D      | N/D           | N/D       | N/D           | N/D                |
| 1-arachidoyl-GPI* (20:4)                | t0         | 0.0067   | 0.0438  | -0.0034  | -0.0038  | -0.0059  | -0.0077          | 0.0242              | 0.1533*        | 0.0374   | 0.1155*  | -0.0693       | 0.0309    | 0.0192        | -0.0174            |
|                                         | t24        | 0.0155   | -0.0004 | 0.0671   | -0.0209  | -0.0281  | -0.0075          | -0.0371             | -0.0175        | 0.0426   | -0.0245  | -0.0602       | -0.036    | -0.0131       | -0.0114            |
| 1-palmitoylglycerol (16:0)              | t0         | 0.0041   | -0.048  | 0.0148   | -0.007   | 0.0166   | 0.0069           | -0.0064             | -0.0135        | -0.0074  | -0.0241  | 0.0073        | -0.0054   | -0.0095       | 0.1121*            |
|                                         | t24        | 0.0276   | -0.0136 | 0.2603*  | -0.0121  | -0.0565  | -0.0005          | 0.1045*             | -0.041         | -0.0174  | -0.0071  | -0.0036       | 0.0079    | -0.0269       | 0.001              |
| 1-stearoylglycerol (18:0)               | t0         | 0.0807   | -0.0026 | -0.0637  | 0.01     | -0.018   | 0.0406           | -0.0277             | -0.2456*       | 0.0255   | -0.006   | -0.0094       | -0.0074   | -0.0232       | 0.0001             |
|                                         | t24        | -0.0315  | 0.0072  | 0.0446   | 0.0183   | -0.1830* | 0.0579           | 0.0063              | -0.1085*       | 0.0346   | -0.0059  | -0.0003       | 0.0286    | -0.0142       | -0.0073            |
| lathosterol                             | t0         | -0.0289  | 0.0092  | -0.0062  | 0.1511*  | -0.0246  | 0.0237           | -0.0057             | 0.0083         | 0.0028   | 0.0095   | 0.0068        | 0.0297    | 0.014         | -0.0231            |
|                                         | t24        | N/D      | N/D     | N/D      | N/D      | N/D      | N/D              | N/D                 | N/D            | N/D      | N/D      | N/D           | N/D       | N/D           | N/D                |
| cholesterol                             | t0         | 0.0284   | -0.0173 | -0.0025  | 0.0082   | -0.0103  | 0.0147           | -0.026              | 0.0168         | -0.0424  | -0.1203* | 0.1998*       | 0.0475    | -0.024        | -0.0021            |
|                                         | t24        | -0.0142  | -0.0233 | 0.2523*  | 0.0626   | -0.0632  | 0.0572           | -0.0401             | 0.0258         | 0.0159   | 0.0036   | 0.3506*       | 0.0158    | -0.0287       | -0.0167            |
| dehydroisoandrosterone sulfate (DHEA-S) | t0         | -0.1013* | 0.0411  | 0.0333   | 0.0036   | -0.0105  | -0.0196          | -0.0065             | -0.0055        | -0.0628  | -0.0098  | -0.0294       | -0.0074   | 0.0357        | -0.0044            |
|                                         | t24        | -0.0191  | -0.0046 | 0.0837   | -0.0015  | 0.0126   | -0.0209          | -0.0027             | -0.0011        | -0.0411  | -0.0134  | -0.0081       | 0.0078    | 0.0852        | 0.0002             |

| Biochemical Name                   | Time Point | SIRS     | UCS      | SS      | SShock  | SNS     | <i>S. aureus</i> | <i>S. pneumonia</i> | <i>E. coli</i> | Gender   | Race     | Liver Disease | Hepatitis | Alcohol Abuse | Neoplastic Disease |
|------------------------------------|------------|----------|----------|---------|---------|---------|------------------|---------------------|----------------|----------|----------|---------------|-----------|---------------|--------------------|
| epiandrosterone sulfate            | t0         | -0.1226* | 0.0149   | 0.0476  | -0.008  | 0.007   | -0.0441          | -0.0141             | 0.0279         | -0.0568  | -0.0017  | -0.0342       | -0.0068   | 0.027         | -0.006             |
|                                    | t24        | -0.0455  | -0.001   | 0.0165  | -0.0083 | 0.016   | -0.0471          | -0.0105             | 0.0265         | -0.0139  | -0.0235  | -0.0092       | 0.0006    | 0.019         | 0.0104             |
| androsterone sulfate               | t0         | -0.1641* | 0.0126   | 0.2292* | -0.0237 | 0.0115  | -0.0627          | 0.002               | 0.027          | -0.024   | 0        | -0.0123       | -0.0219   | 0.1858*       | 0.0009             |
|                                    | t24        | -0.0465  | -0.011   | 0.3719* | -0.0186 | 0.0229  | -0.0366          | -0.0018             | 0.0063         | -0.0034  | -0.0075  | 0.0099        | -0.0048   | 0.0662        | 0.0217             |
| cortisol                           | t0         | -0.1133* | -0.0285  | 0.0014  | 0.0543  | 0.0439  | -0.0388          | -0.0379             | -0.0141        | 0.013    | 0.0153   | -0.0397       | -0.0274   | 0.024         | 0.0019             |
|                                    | t24        | -0.083   | -0.0506  | -0.0254 | 0.1603* | 0.0699  | -0.007           | -0.0551             | -0.0163        | -0.026   | 0.0168   | -0.019        | -0.0605   | 0.0257        | 0.0037             |
| cortisone                          | t0         | N/D      | N/D      | N/D     | N/D     | N/D     | N/D              | N/D                 | N/D            | N/D      | N/D      | N/D           | N/D       | N/D           | N/D                |
|                                    | t24        | 0.0145   | 0.0071   | -0.0653 | -0.0406 | 0.2909* | 0.028            | -0.0223             | 0.0158         | 0.0008   | -0.0109  | 0.0013        | -0.0149   | 0.0916        | 0.0268             |
| beta-sitosterol                    | t0         | 0.0182   | 0.0023   | -0.0002 | 0.0053  | -0.0492 | 0.0048           | 0.0289              | -0.0059        | 0.0056   | -0.0292  | 0.6034*       | 0.0178    | -0.001        | 0.0053             |
|                                    | t24        | N/D      | N/D      | N/D     | N/D     | N/D     | N/D              | N/D                 | N/D            | N/D      | N/D      | N/D           | N/D       | N/D           | N/D                |
| 7-HOCA                             | t0         | -0.0123  | 0.0119   | -0.0689 | -0.0344 | 0.1252* | -0.0277          | 0.0023              | 0.0074         | 0.007    | 0.0101   | 0.6135*       | 0.0324    | -0.0228       | -0.0064            |
|                                    | t24        | 0.0001   | -0.0134  | -0.0402 | -0.0145 | 0.1419* | -0.0272          | 0.0088              | -0.0132        | 0.0197   | -0.0086  | 0.6855*       | -0.0074   | 0.0216        | 0.0119             |
| xanthine                           | t0         | 0.0273   | -0.0572  | 0.0004  | -0.0261 | 0.0933  | -0.0165          | 0.0111              | -0.0011        | -0.0018  | -0.0449  | 0.0291        | -0.0728   | 0.1904*       | -0.0079            |
|                                    | t24        | 0.0149   | 0.0398   | 0.0745  | -0.0626 | -0.0151 | -0.0086          | 0.0596              | 0.2026*        | -0.0264  | 0.0184   | 0.2314*       | -0.0082   | 0.0187        | -0.0178            |
| hypoxanthine                       | t0         | 0.0107   | -0.0595  | 0.0067  | -0.0534 | 0.042   | -0.0125          | 0.073               | -0.0176        | 0.0634   | -0.0184  | -0.0243       | -0.0409   | -0.0642       | -0.03              |
|                                    | t24        | -0.0237  | 0.013    | 0.0683  | -0.0091 | -0.0059 | 0.0198           | -0.0272             | 0.083          | -0.013   | 0.1330*  | -0.023        | 0.0031    | -0.0221       | -0.0326            |
| 1-methyladenosine                  | t0         | -0.1403* | 0.0071   | 0.01    | -0.0092 | 0.1384* | -0.0055          | 0.017               | -0.2848*       | -0.0018  | -0.008   | -0.0097       | 0.0165    | -0.0396       | 0.0391             |
|                                    | t24        | -0.1434* | -0.1215* | 0.031   | -0.0017 | 0.0876  | -0.0186          | 0.0543              | -0.1128*       | 0.0802   | 0.0516   | 0.0126        | -0.0073   | 0.0138        | -0.0229            |
| adenosine 5'-monophosphate (AMP)   | t0         | 0.0213   | 0.003    | -0.0539 | 0.088   | -0.033  | -0.0207          | -0.0165             | 0.0106         | -0.0362  | 0.0495   | -0.0406       | -0.0647   | -0.007        | -0.0001            |
|                                    | t24        | -0.0143  | 0.0336   | -0.0142 | 0.0343  | -0.0848 | 0.0384           | -0.0153             | 0.0055         | -0.0128  | 0.0505   | -0.052        | 0.0011    | -0.0346       | -0.1296*           |
| N2,N2-dimethylguanosine            | t0         | -0.0432  | -0.0197  | 0.037   | 0.0065  | 0.5891* | -0.0165          | 0.0059              | -0.0184        | -0.0075  | 0.0091   | -0.0516       | -0.0065   | -0.0023       | 0.0161             |
|                                    | t24        | -0.0395  | -0.0369  | 0.006   | 0.0262  | 0.5792* | 0.0362           | 0.0743              | -0.0444        | 0.0826   | -0.0352  | 0.0147        | -0.0022   | -0.0113       | 0.0007             |
| N6-carbamoylthreonyladenosine      | t0         | -0.0038  | -0.012   | 0.0328  | -0.0011 | 0.5570* | -0.0555          | -0.0115             | -0.0023        | 0.0002   | 0.0236   | -0.0504       | -0.0195   | 0.0049        | 0.026              |
|                                    | t24        | -0.0954  | -0.0466  | 0.0421  | 0.0153  | 0.3715* | 0.0005           | 0.0464              | -0.0668        | 0.032    | -0.0767  | -0.0006       | -0.0134   | -0.0014       | -0.0088            |
| urate                              | t0         | -0.0042  | -0.0486  | -0.0004 | -0.0121 | 0.1     | -0.0073          | -0.0032             | 0.0088         | -0.0379  | -0.1804* | -0.0163       | 0.0026    | -0.0186       | 0.0171             |
|                                    | t24        | 0.0287   | -0.1225* | -0.0055 | -0.0085 | 0.1667* | -0.0363          | -0.008              | 0.0306         | -0.0061  | -0.0918  | -0.0106       | -0.024    | -0.0227       | 0.0123             |
| allantoin                          | t0         | 0.0578   | -0.0543  | -0.0161 | -0.0045 | 0.4532* | -0.0429          | 0.0221              | -0.0076        | -0.1359* | -0.0332  | 0.0438        | 0.0029    | -0.0254       | 0.0331             |
|                                    | t24        | 0.0287   | -0.04    | 0.0015  | -0.0235 | 0.3857* | -0.0058          | 0.0059              | -0.0214        | -0.0037  | -0.0997  | 0.0211        | 0.0115    | 0.0242        | 0.0079             |
| uridine                            | t0         | 0.3687*  | 0.0057   | -0.0003 | -0.0516 | 0.0019  | 0.0304           | -0.0375             | 0.0148         | 0.0738   | 0.0451   | -0.0163       | -0.0111   | -0.0181       | -0.0695            |
|                                    | t24        | 0.0189   | 0.0002   | 0.0903  | -0.0605 | -0.0737 | 0.07             | 0.0047              | 0.0736         | 0.038    | 0.0677   | -0.1075*      | -0.0092   | 0.0231        | 0.0516             |
| pseudouridine                      | t0         | -0.0055  | -0.0279  | 0.0212  | 0.0113  | 0.6664* | -0.0091          | 0.0079              | -0.0037        | -0.0336  | -0.013   | -0.0051       | -0.0075   | 0.0027        | 0.0304             |
|                                    | t24        | -0.0119  | -0.0663  | 0.0209  | -0.004  | 0.3705* | -0.0266          | -0.014              | -0.0126        | 0.0297   | -0.0014  | 0.0805        | -0.0094   | -0.0157       | 0.004              |
| gulono-1,4-lactone                 | t0         | -0.0131  | -0.0633  | -0.0024 | 0.0486  | 0.0228  | 0.0052           | -0.0149             | -0.0048        | -0.0751  | -0.0317  | -0.018        | -0.019    | -0.0203       | 0.0305             |
|                                    | t24        | -0.0226  | -0.0775  | 0.0616  | 0.001   | 0.0132  | 0.0067           | 0.0018              | -0.0093        | 0.0029   | -0.0411  | 0.009         | -0.0005   | -0.0203       | 0.0166             |
| threonate                          | t0         | 0.0094   | -0.033   | -0.02   | 0.0038  | 0.0321  | -0.0252          | -0.0086             | -0.0011        | -0.0522  | 0.0241   | -0.0117       | 0.0066    | -0.0682       | -0.0001            |
|                                    | t24        | 0.0198   | -0.0182  | -0.0129 | 0.0108  | 0.0303  | -0.0416          | -0.0219             | 0.0017         | 0.0051   | 0.0266   | 0.0111        | -0.0141   | -0.0964       | -0.004             |
| heme                               | t0         | 0.0593   | -0.009   | 0.0232  | -0.0441 | -0.0057 | -0.0232          | -0.0025             | 0.0214         | 0.0274   | -0.0405  | 0.0265        | -0.0091   | -0.0271       | -0.0054            |
|                                    | t24        | -0.0183  | -0.0035  | 0.0443  | 0.0014  | -0.0237 | 0.005            | 0.0015              | 0.0279         | -0.0258  | 0.0139   | -0.0323       | 0.0162    | 0.0024        | -0.0084            |
| bilirubin                          | t0         | -0.0314  | -0.0005  | -0.0441 | -0.015  | 0.0985  | -0.0216          | 0.0005              | -0.0017        | 0.0326   | 0.0228   | 0.4212*       | 0.0055    | -0.0116       | -0.0137            |
|                                    | t24        | -0.0416  | 0.0099   | -0.0217 | 0.0062  | 0.2644* | 0                | -0.006              | 0.0125         | -0.0052  | 0.0005   | 0.1639*       | -0.012    | -0.0097       | 0.0178             |
| bilirubin (E,E)                    | t0         | -0.0089  | 0.0899   | -0.0403 | -0.0344 | 0.0262  | -0.098           | 0.0051              | 0.045          | -0.0023  | 0.0273   | 0.3317*       | 0.0046    | -0.0026       | -0.0278            |
|                                    | t24        | 0.0122   | 0.0341   | -0.071  | -0.0299 | 0.021   | -0.0383          | -0.0151             | 0.0626         | -0.031   | -0.0052  | 0.3849*       | -0.0278   | 0.0361        | 0.0163             |
| bilirubin (E,Z or Z,E)             | t0         | -0.0169  | 0.2295*  | 0.0105  | -0.0009 | -0.0063 | -0.0163          | -0.0117             | 0.0552         | -0.022   | 0.0498   | 0.0717        | -0.0031   | -0.0123       | 0.0091             |
|                                    | t24        | N/D      | N/D      | N/D     | N/D     | N/D     | N/D              | N/D                 | N/D            | N/D      | N/D      | N/D           | N/D       | N/D           | N/D                |
| biliverdin                         | t0         | 0.0135   | 0.1089*  | -0.0131 | -0.0244 | 0.0039  | -0.1300*         | -0.0035             | 0.0566         | -0.0717  | 0.0286   | 0.3164*       | -0.0005   | -0.0019       | -0.0016            |
|                                    | t24        | -0.0098  | 0.0674   | -0.0339 | -0.0211 | 0.0489  | -0.0254          | 0.0135              | 0.0413         | -0.0849  | 0.0127   | 0.5022*       | -0.0449   | 0.0037        | 0.0142             |
| trigonelline (N'-methylnicotinate) | t0         | N/D      | N/D      | N/D     | N/D     | N/D     | N/D              | N/D                 | N/D            | N/D      | N/D      | N/D           | N/D       | N/D           | N/D                |
|                                    | t24        | 0.017    | -0.03    | 0.0112  | 0.0433  | -0.0513 | 0.0128           | -0.0285             | -0.0303        | 0.0214   | 0.0724   | 0.0143        | 0.0176    | -0.0155       | -0.0135            |
| pantothenate (Vitamin B5)          | t0         | -0.0555  | -0.0158  | -0.0147 | 0.0058  | 0.2864* | -0.0112          | -0.0049             | 0.0067         | -0.0205  | 0.0173   | -0.0132       | -0.0201   | -0.0085       | 0.0375             |
|                                    | t24        | -0.0914  | -0.0404  | -0.0025 | 0.0664  | 0.0964  | -0.0267          | -0.0222             | 0.0227         | -0.0208  | 0.1022*  | -0.0113       | -0.0432   | -0.0319       | 0.022              |

| Biochemical Name               | Time Point | SIRS     | UCS     | SS      | SShock  | SNS      | <i>S. aureus</i> | <i>S. pneumonia</i> | <i>E. coli</i> | Gender   | Race     | Liver Disease | Hepatitis | Alcohol Abuse | Neoplastic Disease |
|--------------------------------|------------|----------|---------|---------|---------|----------|------------------|---------------------|----------------|----------|----------|---------------|-----------|---------------|--------------------|
| alpha-tocopherol               | t0         | 0.018    | -0.0016 | -0.0445 | -0.0094 | 0.0225   | 0.048            | -0.0448             | -0.0016        | 0.1071*  | 0.0601   | -0.0593       | -0.0036   | -0.0053       | 0.0243             |
|                                | t24        | 0.0208   | -0.0302 | -0.0124 | 0.0052  | 0.002    | 0.0089           | -0.0647             | 0.011          | 0.0146   | -0.0167  | 0.0003        | -0.0169   | 0.0097        | 0.0054             |
| pyridoxate                     | t0         | -0.0446  | 0.0035  | -0.0218 | 0.001   | 0.1548*  | 0.0164           | -0.0035             | 0.0007         | -0.1178* | 0.1093*  | -0.0449       | 0.0604    | -0.0231       | 0.0014             |
|                                | t24        | -0.0122  | -0.0254 | 0.0265  | -0.0173 | 0.0404   | 0.2010*          | -0.0159             | -0.0187        | -0.0003  | 0.03     | 0.07          | -0.0021   | -0.0159       | 0.0361             |
| hippurate                      | t0         | -0.0064  | -0.0365 | -0.0296 | 0.0701  | 0.2267*  | -0.0129          | 0.0056              | -0.0152        | -0.0183  | -0.0247  | -0.0502       | 0.1844*   | -0.1085*      | 0.0932             |
|                                | t24        | 0.0076   | -0.0266 | -0.0138 | 0.0968  | -0.004   | -0.0085          | 0.1324*             | -0.011         | 0.1200*  | -0.0835  | -0.0075       | -0.0368   | -0.0526       | -0.012             |
| catechol sulfate               | t0         | 0.02     | -0.0293 | -0.0111 | -0.0167 | 0.0406   | -0.0206          | 0.0059              | -0.0038        | -0.0335  | 0.0573   | -0.0099       | 0.2171*   | -0.0842       | 0.0139             |
|                                | t24        | 0.0062   | -0.0449 | 0.0103  | 0.0012  | 0.0063   | 0.0155           | -0.0081             | 0.0021         | 0.0332   | -0.0044  | 0.0693        | 0.1436*   | 0.009         | 0.0142             |
| 4-vinylphenol sulfate          | t0         | -0.0183  | 0.1257* | -0.0447 | 0.1580* | -0.0154  | -0.0103          | -0.0104             | -0.0615        | -0.0591  | 0.0494   | -0.0109       | 0.011     | -0.0037       | 0.0112             |
|                                | t24        | -0.0011  | 0.0471  | -0.0475 | 0.0474  | -0.0452  | 0.0523           | -0.0019             | -0.0715        | -0.0196  | 0.0223   | 0.0003        | -0.0019   | -0.0215       | 0.0167             |
| glycolate (hydroxyacetate)     | t0         | N/D      | N/D     | N/D     | N/D     | N/D      | N/D              | N/D                 | N/D            | N/D      | N/D      | N/D           | N/D       | N/D           | N/D                |
|                                | t24        | 0.0013   | 0.0125  | -0.0139 | -0.0085 | 0.0256   | -0.0378          | 0.0047              | 0.002          | 0.014    | 0.009    | 0.5219*       | 0.0887    | 0.1219*       | 0.0115             |
| iminodiacetate (IDA)           | t0         | 0.1418*  | -0.0339 | 0.0166  | -0.0283 | -0.0125  | 0.3078*          | -0.0165             | 0.0041         | -0.012   | 0.1337*  | -0.0554       | 0.0693    | -0.0231       | -0.0171            |
|                                | t24        | -0.0039  | -0.0024 | 0.0712  | -0.0698 | 0.0044   | 0.0119           | 0.0092              | -0.0068        | 0.0113   | 0.0587   | -0.0406       | 0.0057    | 0.1720*       | -0.034             |
| salicyluric glucuronide        | t0         | N/D      | N/D     | N/D     | N/D     | N/D      | N/D              | N/D                 | N/D            | N/D      | N/D      | N/D           | N/D       | N/D           | N/D                |
|                                | t24        | 0.0105   | -0.0512 | 0.023   | -0.0272 | 0.0219   | 0.0006           | -0.0294             | 0.0013         | 0.0221   | -0.0661  | -0.0396       | -0.0137   | -0.0267       | 0.0017             |
| 4-acetaminophen sulfate        | t0         | -0.0634  | 0.0745  | 0.0025  | 0.2052* | -0.0387  | -0.0605          | -0.0143             | -0.0984        | -0.0213  | 0.1433*  | -0.0272       | 0.0192    | 0.0046        | -0.0106            |
|                                | t24        | -0.3917* | 0.0376  | -0.0048 | 0.0221  | -0.1438* | -0.1300*         | 0.0467              | -0.0743        | 0.0131   | 0.0034   | -0.0097       | -0.0166   | -0.0337       | 0.0098             |
| 4-acetamidophenol              | t0         | -0.1302* | 0.0768  | -0.0041 | 0.0384  | -0.015   | -0.0537          | 0.0218              | -0.0548        | 0.0048   | 0.3310*  | -0.0258       | 0.0324    | 0.0075        | 0.0069             |
|                                | t24        | -0.1869* | 0.0882  | 0.0506  | -0.0058 | -0.0417  | -0.078           | 0.0256              | -0.0188        | -0.015   | 0.028    | -0.0304       | -0.0109   | -0.0304       | 0.0033             |
| p-acetamidophenylglucuronide   | t0         | -0.0089  | 0.0072  | -0.0217 | 0.0478  | -0.0092  | -0.0219          | -0.0056             | -0.0429        | -0.0111  | 0.1237*  | -0.0097       | 0.0774    | -0.0426       | -0.0441            |
|                                | t24        | -0.1856* | 0.1160* | 0.0135  | 0.0146  | -0.0234  | -0.0151          | 0.0089              | -0.0945        | 0.0224   | 0.0333   | 0.0164        | -0.01     | -0.0283       | -0.0203            |
| 2-hydroxyacetaminophen sulfate | t0         | -0.0144  | 0.0154  | -0.0165 | 0.0309  | -0.0219  | -0.0865          | 0.0065              | -0.0557        | -0.0999  | 0.0412   | -0.0255       | 0.1231*   | -0.0158       | -0.0173            |
|                                | t24        | -0.2769* | 0.3610* | -0.0126 | 0.086   | -0.0432  | -0.3245*         | 0.0208              | -0.0502        | -0.0389  | -0.0013  | 0.0186        | 0.0083    | -0.0174       | 0.0079             |
| 2-methoxyacetaminophen sulfate | t0         | -0.0725  | 0.0488  | 0.0311  | 0.1624* | -0.04    | -0.0971          | 0.0116              | -0.0547        | -0.0288  | 0.0938   | -0.0329       | 0.1468*   | -0.0005       | -0.0251            |
|                                | t24        | -0.4057* | 0.1616* | -0.0042 | 0.1056* | -0.2646* | -0.2318*         | 0.0627              | -0.0972        | -0.0019  | 0.0021   | -0.0059       | -0.0298   | -0.0789       | -0.0002            |
| 3-(cystein-S-yl)acetaminophen  | t0         | -0.1609* | 0.0062  | 0.0115  | 0.0369  | -0.0113  | -0.0412          | 0.0373              | -0.015         | -0.0145  | 0.1901*  | -0.0182       | 0.0487    | 0.05          | -0.0003            |
|                                | t24        | -0.2578* | 0.2881* | 0.0235  | 0.0215  | -0.0796  | -0.0751          | 0.0721              | -0.0094        | -0.0086  | 0.0274   | -0.0237       | 0.0032    | -0.0184       | 0.0026             |
| ibuprofen                      | t0         | N/D      | N/D     | N/D     | N/D     | N/D      | N/D              | N/D                 | N/D            | N/D      | N/D      | N/D           | N/D       | N/D           | N/D                |
|                                | t24        | -0.0023  | -0.0035 | 0.003   | -0.0153 | 0.0388   | 0.0032           | -0.0002             | 0.0029         | 0.0146   | 0.0356   | 0.0261        | 0.0009    | 0.0171        | 0.2549*            |
| hydroquinone sulfate           | t0         | N/D      | N/D     | N/D     | N/D     | N/D      | N/D              | N/D                 | N/D            | N/D      | N/D      | N/D           | N/D       | N/D           | N/D                |
|                                | t24        | -0.03    | -0.0338 | -0.0295 | 0.1125* | 0.0377   | 0.0141           | 0.044               | -0.0279        | -0.0029  | -0.2108* | -0.009        | -0.0439   | -0.0445       | 0.0407             |
| galactonate                    | t0         | 0.0417   | -0.04   | -0.0082 | 0.0678  | -0.0337  | -0.0021          | -0.062              | -0.0114        | -0.001   | -0.0128  | 0.0019        | -0.0188   | 0.0013        | 0.0414             |
|                                | t24        | 0.0335   | -0.0113 | -0.0135 | 0.1410* | -0.0364  | 0.0032           | 0.0328              | 0.0059         | -0.0064  | -0.0742  | -0.0044       | -0.1263*  | 0.2883*       | 0.0084             |
| quinate                        | t0         | 0.0394   | -0.0538 | -0.0104 | 0.0097  | 0.002    | -0.0195          | -0.0545             | 0.003          | 0.0465   | 0.0232   | -0.006        | -0.0024   | -0.0501       | 0.0428             |
|                                | t24        | 0.0295   | -0.0297 | 0.0112  | 0.0011  | 0.0063   | 0.0177           | -0.0404             | -0.0174        | 0.0116   | 0.0164   | 0.0581        | -0.0085   | -0.0193       | 0.0063             |
| piperine                       | t0         | 0.036    | 0.0079  | -0.0116 | 0.0837  | -0.0745  | 0.0005           | -0.0003             | -0.0286        | 0.001    | 0.0066   | -0.0077       | 0.031     | -0.0427       | 0.1504*            |
|                                | t24        | 0.0566   | -0.0241 | -0.0502 | 0.1531* | -0.0417  | -0.0382          | -0.016              | -0.0202        | -0.0168  | 0.0335   | -0.0114       | 0.0131    | -0.0314       | -0.0004            |
| caffeine                       | t0         | -0.035   | 0.0172  | -0.0006 | 0.015   | -0.0031  | 0.0093           | 0.006               | -0.0017        | 0.0204   | 0.0406   | 0.5353*       | 0.008     | -0.0046       | -0.039             |
|                                | t24        | -0.0405  | 0.0166  | -0.0069 | 0.0098  | 0.0418   | 0.0421           | -0.0143             | -0.0044        | 0.0497   | 0.0386   | 0.5713*       | 0.0064    | 0.0031        | -0.025             |
| 1-methylurate                  | t0         | N/D      | N/D     | N/D     | N/D     | N/D      | N/D              | N/D                 | N/D            | N/D      | N/D      | N/D           | N/D       | N/D           | N/D                |
|                                | t24        | 0.0066   | -0.0062 | -0.0056 | -0.0208 | 0.3777*  | -0.0095          | -0.0364             | 0.0599         | 0.1190*  | -0.0113  | -0.0446       | -0.0035   | -0.008        | -0.0081            |
| erythritol                     | t0         | -0.0046  | -0.0598 | 0.0093  | 0.0304  | 0.6020*  | 0.0015           | 0.003               | -0.0083        | -0.1100* | -0.0816  | -0.014        | -0.0038   | -0.008        | 0.0357             |
|                                | t24        | -0.006   | -0.0667 | -0.0054 | 0.0126  | 0.4089*  | -0.008           | -0.0005             | -0.0071        | 0.0011   | -0.0762  | 0.081         | -0.017    | -0.0314       | 0.0107             |
| X-01911                        | t0         | N/D      | N/D     | N/D     | N/D     | N/D      | N/D              | N/D                 | N/D            | N/D      | N/D      | N/D           | N/D       | N/D           | N/D                |
|                                | t24        | 0.0148   | 0.0035  | -0.0005 | 0.3205* | -0.0284  | -0.0138          | 0.0445              | -0.0232        | -0.0264  | 0.0395   | -0.0012       | 0.1024*   | -0.0637       | -0.0101            |
| X-02249                        | t0         | 0.0042   | 0.0227  | -0.022  | 0.0179  | -0.0774  | -0.0205          | -0.0098             | 0.0235         | 0.0346   | 0.066    | -0.0475       | 0.0034    | -0.0966       | 0.1857*            |
|                                | t24        | 0.0528   | -0.0116 | -0.0112 | 0.0234  | -0.1156* | 0.0262           | -0.013              | -0.0113        | 0.2293*  | 0.0753   | -0.0137       | -0.0029   | -0.1451*      | 0.2732*            |
| X-03056                        | t0         | -0.0306  | 0.0002  | 0.0159  | -0.0099 | 0.4493*  | 0.0284           | -0.0016             | -0.0044        | 0.0246   | -0.0442  | -0.0871       | -0.0188   | 0.0115        | -0.0408            |
|                                | t24        | -0.0165  | -0.0308 | 0.0241  | -0.0302 | 0.2829*  | 0.0095           | -0.009              | -0.0008        | 0.0596   | -0.0369  | -0.0359       | -0.0274   | -0.0267       | -0.0111            |

| Biochemical Name                  | Time Point | SIRS     | UCS     | SS      | SShock   | SNS      | <i>S. aureus</i> | <i>S. pneumonia</i> | <i>E. coli</i> | Gender   | Race     | Liver Disease | Hepatitis | Alcohol Abuse | Neoplastic Disease |
|-----------------------------------|------------|----------|---------|---------|----------|----------|------------------|---------------------|----------------|----------|----------|---------------|-----------|---------------|--------------------|
| X-06126                           | t0         | -0.0698  | -0.0146 | 0.0102  | 0.0104   | 0.0574   | 0.0122           | 0.009               | -0.0099        | 0.0267   | 0.0868   | 0.0003        | 0.0058    | -0.0131       | 0.1943*            |
|                                   | t24        | -0.0314  | -0.0581 | 0.0447  | 0.0168   | 0.0478   | 0.0514           | -0.0052             | -0.0097        | 0.0353   | 0.0568   | 0.0568        | -0.009    | -0.0228       | 0.0714             |
| X-07765                           | t0         | -0.0211  | 0.1251* | -0.0455 | 0.028    | -0.0109  | 0.0418           | -0.0095             | -0.0414        | 0.0114   | 0.0396   | -0.0088       | 0.0093    | 0.0015        | -0.0188            |
|                                   | t24        | -0.0139  | 0.048   | -0.0436 | 0.0343   | -0.012   | 0.1222*          | 0.0313              | -0.0322        | 0.0227   | 0.0005   | 0.0027        | 0.0203    | 0.0081        | -0.0169            |
| X-09789                           | t0         | 0.0078   | 0.0031  | -0.052  | 0.0296   | -0.0087  | 0.0583           | 0.0139              | -0.0138        | 0.0046   | 0.0402   | 0.0006        | 0.049     | -0.0398       | 0.0176             |
|                                   | t24        | 0.0055   | -0.0188 | -0.0155 | 0.0512   | -0.0154  | 0.058            | -0.0306             | -0.0302        | 0.0128   | 0.0651   | 0.0878        | 0.0164    | -0.0338       | 0.0111             |
| X-11204                           | t0         | 0.0191   | -0.0019 | -0.0203 | -0.007   | -0.0126  | 0.0106           | 0.0889              | -0.0548        | -0.008   | -0.0121  | 0.0029        | 0.0375    | 0.0306        | 0.0099             |
|                                   | t24        | 0.1060*  | 0.0679  | -0.0044 | -0.1016* | -0.0962  | -0.0015          | -0.0642             | 0.0362         | 0.0072   | 0.0068   | 0.0138        | -0.1074*  | -0.0827       | -0.3092*           |
| X-11244                           | t0         | -0.1389* | -0.0647 | 0.0001  | 0.0816   | 0.021    | -0.0074          | -0.0188             | 0.0181         | -0.0688  | -0.0041  | -0.0427       | -0.0108   | 0.2350*       | 0.0008             |
|                                   | t24        | -0.1349* | -0.0791 | 0.0267  | 0.0686   | 0.0444   | 0.0623           | -0.0005             | 0.0175         | -0.0444  | -0.0749  | -0.0096       | 0.0146    | 0.1275*       | 0.0362             |
| X-11245                           | t0         | -0.1573* | -0.0118 | 0.0133  | 0.0436   | 0.0071   | 0.0384           | -0.0047             | -0.0309        | -0.1442* | 0.006    | -0.0392       | -0.021    | 0.0525        | 0.0118             |
|                                   | t24        | -0.0921  | -0.0588 | 0.0185  | 0.1261*  | 0.014    | 0.1457*          | -0.03               | -0.0081        | -0.0767  | -0.0293  | -0.0338       | -0.0306   | 0.0098        | 0.0644             |
| X-11255                           | t0         | 0.0098   | 0.0215  | -0.0007 | 0.0005   | -0.0218  | -0.0086          | -0.0019             | -0.0057        | -0.0684  | 0.1676*  | -0.0065       | -0.0855   | 0.7154*       | 0.0125             |
|                                   | t24        | 0.0497   | 0.0063  | -0.0309 | 0.0225   | -0.0427  | -0.0065          | -0.0225             | -0.0069        | -0.0509  | 0.2091*  | -0.0032       | -0.0673   | 0.5780*       | 0.0172             |
| X-11261                           | t0         | 0.0277   | 0.0379  | -0.0277 | -0.0085  | -0.0111  | 0.0438           | -0.0081             | -0.0039        | 0.009    | 0.026    | -0.1045*      | -0.0112   | -0.0321       | -0.021             |
|                                   | t24        | 0.0155   | -0.0022 | -0.0126 | -0.003   | -0.0003  | 0.0834           | -0.0146             | -0.0033        | 0.1223*  | -0.0102  | -0.062        | -0.0228   | -0.0991       | 0.0002             |
| X-11273                           | t0         | -0.1580* | -0.0264 | 0.0612  | 0.0614   | -0.0215  | -0.0254          | -0.0046             | -0.0168        | -0.0463  | -0.0131  | -0.0409       | -0.0041   | 0.0287        | 0.0072             |
|                                   | t24        | -0.1303* | -0.0259 | 0.1524* | 0.0029   | 0.0261   | 0.0327           | -0.0233             | -0.0288        | -0.0527  | -0.0383  | 0.0104        | -0.0174   | 0.0029        | 0.0104             |
| X-11282                           | t0         | -0.0326  | -0.0035 | 0.0362  | -0.0056  | 0.0213   | 0.1712*          | 0.1597*             | -0.0667        | -0.1572* | -0.0189  | -0.0255       | 0.0031    | -0.0062       | -0.0026            |
|                                   | t24        | -0.0083  | -0.0461 | 0.0146  | -0.0049  | 0.0305   | 0.3274*          | 0.0351              | -0.0727        | -0.0209  | -0.0777  | -0.0335       | -0.0057   | 0.0033        | -0.0006            |
| X-11299                           | t0         | 0.0139   | -0.0099 | -0.0229 | -0.0389  | 0.0858   | 0.0081           | 0.013               | -0.0066        | 0.0516   | -0.0665  | 0.0053        | -0.0057   | -0.0155       | -0.0379            |
|                                   | t24        | 0.0244   | -0.031  | -0.0035 | -0.0193  | 0.0227   | 0.0455           | -0.0019             | -0.0104        | 0.0316   | -0.0147  | 0.0277        | -0.0017   | -0.0121       | -0.0803            |
| X-11302                           | t0         | -0.1102* | 0.0554  | 0.0034  | 0.049    | -0.0271  | -0.0216          | -0.0077             | -0.0093        | -0.1052* | 0.0235   | -0.0316       | -0.0118   | 0.0004        | 0.0001             |
|                                   | t24        | -0.0415  | 0.0021  | -0.0033 | 0.1097*  | -0.0089  | -0.0012          | -0.0243             | -0.001         | -0.081   | 0.0278   | -0.0178       | -0.0325   | -0.0045       | 0.0131             |
| X-11303                           | t0         | -0.0041  | -0.0143 | 0.0049  | 0.2150*  | -0.0137  | 0.0396           | 0.0162              | -0.0267        | 0.0196   | 0.0014   | 0.0503        | 0.0122    | -0.0001       | -0.0316            |
|                                   | t24        | -0.0105  | -0.0805 | 0.0566  | 0.0341   | -0.0169  | 0.3380*          | 0.0116              | -0.0017        | -0.0032  | 0.0014   | 0.2284*       | 0.0259    | 0.0037        | -0.0008            |
| X-11308                           | t0         | 0.0175   | 0.1856* | -0.0314 | -0.088   | -0.0036  | 0.0216           | 0.0168              | -0.002         | -0.0293  | -0.0252  | 0.007         | -0.0089   | -0.0339       | 0.0346             |
|                                   | t24        | 0.026    | 0.0483  | -0.0047 | -0.0319  | -0.0096  | -0.0184          | 0.0376              | 0.0617         | 0.0086   | -0.0585  | -0.0099       | -0.0051   | -0.0637       | -0.0258            |
| X-11315                           | t0         | 0.0067   | 0.0207  | 0.0022  | -0.1972* | 0.0191   | -0.1681*         | -0.0065             | 0.0142         | -0.2426* | -0.0661  | 0.0201        | -0.0086   | -0.008        | 0.021              |
|                                   | t24        | 0.0117   | 0.0177  | 0.0101  | -0.0485  | -0.0074  | -0.2802*         | -0.0244             | 0.0821         | -0.2908* | -0.041   | 0.0187        | -0.0068   | -0.0308       | 0.0083             |
| X-11317                           | t0         | 0.0113   | 0.0268  | -0.0282 | 0.0168   | -0.0238  | 0.0016           | -0.0175             | 0.0705         | -0.094   | 0.2557*  | -0.0645       | 0.0293    | -0.0427       | -0.051             |
|                                   | t24        | -0.0588  | 0.0444  | 0.073   | -0.0097  | -0.0229  | 0.3676*          | 0.0571              | -0.0062        | 0.0296   | 0.0166   | 0.0116        | 0.0972    | -0.0016       | 0.0231             |
| X-11327                           | t0         | 0.047    | -0.0394 | -0.0369 | 0.0051   | 0.0013   | -0.0479          | 0.0501              | -0.0241        | -0.0147  | -0.0162  | 0.0046        | 0.0168    | 0.0003        | 0.0083             |
|                                   | t24        | 0.0193   | 0.0699  | 0.0065  | -0.1347* | -0.0371  | -0.0223          | -0.0781             | 0.0311         | -0.004   | 0.012    | 0.0289        | -0.0898   | -0.0968       | -0.3209*           |
| X-11333                           | t0         | N/D      | N/D     | N/D     | N/D      | N/D      | N/D              | N/D                 | N/D            | N/D      | N/D      | N/D           | N/D       | N/D           | N/D                |
|                                   | t24        | 0.0399   | -0.0371 | -0.0098 | -0.0195  | 0.1147*  | -0.0003          | 0.0085              | -0.0175        | 0.0937   | -0.1737* | -0.0272       | -0.0139   | -0.053        | 0.0685             |
| X-11334                           | t0         | 0.0076   | -0.0471 | -0.0753 | 0.0116   | 0.2926*  | -0.0009          | -0.0031             | -0.015         | -0.059   | -0.0248  | -0.0194       | 0.0055    | -0.0427       | 0.0837             |
|                                   | t24        | 0.0174   | -0.0834 | -0.0163 | -0.0178  | 0.2449*  | -0.0066          | -0.007              | 0.0024         | 0.084    | -0.0289  | 0.0073        | -0.0506   | -0.0593       | 0.0357             |
| X-11381                           | t0         | 0.012    | -0.0269 | 0.0293  | -0.0313  | 0.5367*  | -0.0041          | 0.0389              | -0.0195        | 0.0201   | -0.026   | -0.1050*      | -0.0125   | 0.031         | -0.0106            |
|                                   | t24        | -0.0051  | -0.0165 | 0.0084  | 0.0069   | 0.3290*  | -0.0083          | 0.0048              | 0.0038         | 0.0327   | -0.0501  | -0.0205       | -0.0223   | -0.0188       | -0.0137            |
| X-11400                           | t0         | N/D      | N/D     | N/D     | N/D      | N/D      | N/D              | N/D                 | N/D            | N/D      | N/D      | N/D           | N/D       | N/D           | N/D                |
|                                   | t24        | 0.037    | 0.0456  | -0.0228 | 0.0134   | -0.0324  | 0.0017           | 0.002               | 0.069          | 0.0141   | 0.0133   | -0.0157       | -0.0163   | -0.017        | -0.0444            |
| X-11412                           | t0         | N/D      | N/D     | N/D     | N/D      | N/D      | N/D              | N/D                 | N/D            | N/D      | N/D      | N/D           | N/D       | N/D           | N/D                |
|                                   | t24        | -0.0353  | 0.0284  | 0.1576* | -0.0146  | -0.1515* | 0.1249*          | -0.0082             | 0.0014         | 0.0079   | 0.0928   | 0.0035        | 0.0356    | -0.0735       | -0.0282            |
| X-11421 (4-cis-decenoylcarnitine) | t0         | 0.0316   | -0.0222 | -0.0018 | -0.0236  | 0.4141*  | -0.0013          | 0.0113              | -0.0067        | 0.0176   | -0.0451  | -0.0725       | -0.016    | 0             | -0.0138            |
|                                   | t24        | 0.0185   | -0.0198 | -0.0022 | -0.0212  | 0.3230*  | 0.0104           | -0.0103             | -0.0019        | 0.0313   | 0.0021   | -0.0595       | -0.0128   | -0.0257       | -0.0102            |
| X-11422                           | t0         | N/D      | N/D     | N/D     | N/D      | N/D      | N/D              | N/D                 | N/D            | N/D      | N/D      | N/D           | N/D       | N/D           | N/D                |
|                                   | t24        | 0.0194   | 0.0197  | 0.0718  | -0.0211  | -0.0875  | -0.0044          | 0.0127              | 0.1326*        | -0.0396  | 0.0331   | 0.0399        | 0.0036    | 0.0592        | -0.0209            |
| X-11423                           | t0         | -0.011   | -0.0263 | -0.0049 | 0.0179   | 0.4231*  | -0.0237          | -0.0115             | -0.0048        | -0.0093  | 0.009    | -0.1371*      | 0.0071    | -0.0276       | 0.0157             |
|                                   | t24        | 0.0461   | -0.0689 | 0.0008  | -0.0049  | 0.5341*  | 0.0099           | 0.0041              | -0.0132        | 0.1462*  | -0.0158  | -0.0188       | -0.0086   | -0.0557       | 0.0628             |

| Biochemical Name | Time Point | SIRS     | UCS      | SS      | SShock  | SNS      | <i>S. aureus</i> | <i>S. pneumonia</i> | <i>E. coli</i> | Gender   | Race    | Liver Disease | Hepatitis | Alcohol Abuse | Neoplastic Disease |
|------------------|------------|----------|----------|---------|---------|----------|------------------|---------------------|----------------|----------|---------|---------------|-----------|---------------|--------------------|
| X-11429          | t0         | -0.0022  | -0.0353  | 0.0175  | 0.0073  | 0.5847*  | -0.0051          | -0.0042             | -0.0004        | -0.0121  | -0.0243 | -0.035        | -0.0309   | -0.024        | 0.0206             |
|                  | t24        | 0.0075   | -0.0552  | 0.0387  | 0.0058  | 0.5791*  | -0.004           | -0.0018             | -0.018         | 0.0288   | -0.0009 | 0.0118        | 0.0042    | -0.0099       | 0.0507             |
| X-11437          | t0         | -0.0149  | -0.0266  | 0.0209  | 0.0313  | 0.0197   | -0.0369          | 0.0554              | -0.0276        | -0.07    | -0.0267 | -0.0273       | -0.0245   | -0.0249       | 0.0099             |
|                  | t24        | -0.0676  | -0.0116  | 0.0017  | 0.0666  | 0.0028   | 0.091            | -0.0148             | -0.0491        | -0.0269  | -0.0009 | 0.0112        | -0.0302   | -0.025        | -0.0052            |
| X-11438          | t0         | -0.0073  | 0.0017   | 0.0034  | -0.0405 | 0.0404   | -0.0092          | -0.0001             | 0.0076         | 0.0666   | 0.0116  | 0.0195        | -0.0218   | -0.0188       | -0.0077            |
|                  | t24        | -0.0405  | -0.0218  | 0.0205  | 0.0055  | 0.1439*  | 0.0519           | -0.0051             | -0.0125        | 0.0057   | -0.0119 | 0.1677*       | -0.0154   | -0.0277       | 0.08               |
| X-11440          | t0         | -0.1502* | -0.019   | -0.0038 | 0.0992  | 0.0172   | 0.018            | -0.0048             | 0.0026         | -0.1846* | -0.003  | -0.0343       | -0.0201   | 0.0271        | 0.0309             |
|                  | t24        | -0.0591  | -0.0208  | 0.0081  | 0.3492* | 0.0488   | 0.1260*          | -0.0045             | 0.0008         | -0.0401  | -0.0647 | -0.0162       | -0.0618   | -0.0158       | 0.1845*            |
| X-11441          | t0         | N/D      | N/D      | N/D     | N/D     | N/D      | N/D              | N/D                 | N/D            | N/D      | N/D     | N/D           | N/D       | N/D           | N/D                |
|                  | t24        | 0.0029   | 0.0177   | -0.0473 | -0.0295 | 0.087    | -0.0283          | -0.0166             | 0.0209         | 0.0182   | 0.0218  | 0.6959*       | -0.0106   | -0.0069       | -0.0115            |
| X-11442          | t0         | N/D      | N/D      | N/D     | N/D     | N/D      | N/D              | N/D                 | N/D            | N/D      | N/D     | N/D           | N/D       | N/D           | N/D                |
|                  | t24        | 0.0036   | 0.0185   | -0.0412 | -0.0279 | 0.077    | -0.0294          | -0.0125             | 0.017          | 0.0062   | 0.016   | 0.6582*       | -0.0046   | -0.0059       | -0.0018            |
| X-11443          | t0         | -0.0737  | -0.0401  | 0.028   | 0.0059  | 0.0506   | -0.0049          | -0.0182             | 0.0025         | -0.0689  | 0.0234  | -0.0001       | -0.0235   | 0.0425        | 0.0166             |
|                  | t24        | -0.0455  | -0.0374  | 0.0855  | -0.0144 | 0.1377*  | 0.0282           | -0.0236             | 0.0105         | -0.0594  | -0.0106 | 0.0117        | -0.0077   | 0.0021        | 0.0129             |
| X-11444          | t0         | -0.0441  | 0.018    | -0.021  | 0.3667* | 0.0144   | -0.0457          | -0.0301             | 0.0317         | -0.0237  | 0.0076  | -0.0496       | -0.1033*  | -0.0234       | 0.0332             |
|                  | t24        | -0.007   | -0.0041  | -0.0073 | 0.3830* | 0.0014   | -0.0272          | -0.0596             | -0.0067        | 0.0145   | 0.0448  | -0.0137       | -0.0762   | -0.0201       | 0.0096             |
| X-11445          | t0         | -0.0711  | -0.0191  | 0.0516  | 0.0234  | 0.0089   | 0.0205           | 0.017               | -0.0079        | -0.0019  | 0.0253  | -0.0478       | -0.1032*  | 0.4699*       | -0.025             |
|                  | t24        | -0.0427  | -0.0373  | 0.0207  | 0.1126* | -0.0116  | 0.0052           | -0.001              | -0.0082        | -0.0068  | 0.0171  | -0.0333       | -0.0173   | 0.0985        | 0.0097             |
| X-11450          | t0         | -0.0641  | 0.0085   | -0.017  | 0.0173  | 0.0261   | 0.0047           | -0.0267             | -0.0089        | -0.1266* | 0.0058  | -0.0412       | -0.0152   | 0.0076        | -0.0063            |
|                  | t24        | -0.0174  | -0.0474  | -0.0056 | 0.0219  | 0.0658   | 0.0479           | -0.0303             | -0.0033        | -0.0631  | -0.0301 | -0.0221       | -0.027    | -0.0003       | -0.0026            |
| X-11452          | t0         | -0.0043  | -0.0223  | -0.0172 | 0.1655* | -0.0044  | -0.0041          | 0.0092              | -0.0292        | -0.0045  | 0.019   | 0.0026        | 0.1081*   | -0.0318       | 0.0229             |
|                  | t24        | 0.0637   | -0.0553  | -0.0279 | 0.0544  | -0.0107  | -0.0409          | -0.0017             | -0.0372        | 0.0073   | 0.0004  | 0.0061        | 0.0085    | -0.0331       | -0.006             |
| X-11469          | t0         | N/D      | N/D      | N/D     | N/D     | N/D      | N/D              | N/D                 | N/D            | N/D      | N/D     | N/D           | N/D       | N/D           | N/D                |
|                  | t24        | 0.0217   | 0.0013   | 0.0404  | -0.0317 | -0.0129  | -0.045           | 0.0362              | 0.018          | -0.1023* | 0.0369  | -0.0218       | -0.0131   | -0.0279       | -0.0319            |
| X-11470          | t0         | -0.0224  | 0.0085   | -0.0224 | 0.1568* | -0.0102  | -0.0907          | -0.032              | 0.0083         | -0.0849  | 0.0595  | -0.025        | -0.0163   | -0.0308       | -0.0045            |
|                  | t24        | -0.0094  | -0.0102  | -0.0238 | 0.0914  | 0.0049   | -0.0148          | -0.0227             | 0.0069         | -0.0159  | 0.0438  | -0.0129       | -0.0229   | -0.0176       | -0.0021            |
| X-11476          | t0         | N/D      | N/D      | N/D     | N/D     | N/D      | N/D              | N/D                 | N/D            | N/D      | N/D     | N/D           | N/D       | N/D           | N/D                |
|                  | t24        | -0.0025  | 0.2210*  | 0.0128  | -0.0319 | -0.0074  | 0.0124           | 0.0088              | 0.0174         | 0.0053   | 0.0867  | 0.0154        | -0.0342   | -0.0113       | -0.2373*           |
| X-11478          | t0         | 0.056    | 0.0505   | -0.004  | -0.0109 | -0.0923  | 0.0182           | -0.0119             | 0.0218         | -0.0203  | 0.0122  | -0.0275       | -0.0759   | 0.0119        | -0.0992            |
|                  | t24        | 0.0585   | 0.0541   | -0.0586 | -0.0133 | -0.0141  | 0.0537           | -0.002              | -0.0168        | 0.0213   | 0.0419  | 0.034         | 0.0122    | -0.0625       | -0.0165            |
| X-11483          | t0         | N/D      | N/D      | N/D     | N/D     | N/D      | N/D              | N/D                 | N/D            | N/D      | N/D     | N/D           | N/D       | N/D           | N/D                |
|                  | t24        | 0.0456   | -0.0066  | -0.0484 | 0.0009  | 0.001    | 0.0071           | 0.0107              | -0.0066        | 0.0715   | -0.0006 | -0.0089       | -0.0125   | -0.0232       | -0.0435            |
| X-11490          | t0         | -0.0052  | -0.0033  | 0.2171* | -0.0196 | 0.0032   | -0.006           | 0.2967*             | -0.0108        | -0.0634  | -0.007  | -0.0041       | -0.0111   | -0.0081       | -0.0096            |
|                  | t24        | -0.0026  | -0.029   | 0.0942  | -0.0186 | 0.0133   | 0.0111           | 0.2498*             | -0.0339        | -0.0334  | -0.0302 | 0.0061        | -0.0083   | -0.0321       | -0.0202            |
| X-11491          | t0         | 0.02     | -0.031   | -0.0054 | -0.0233 | 0.1374*  | -0.0094          | 0.1636*             | -0.0176        | 0.0015   | -0.0622 | -0.0241       | -0.0329   | -0.0479       | 0.1075*            |
|                  | t24        | -0.0026  | -0.0229  | -0.0128 | -0.0021 | 0.2393*  | -0.0022          | 0.1283*             | -0.0175        | -0.005   | -0.0311 | -0.0159       | -0.0019   | -0.0456       | 0.1866*            |
| X-11497          | t0         | 0.0035   | 0.031    | 0.0022  | 0.0035  | -0.0202  | 0.0274           | -0.0483             | 0.0576         | -0.0556  | 0.049   | -0.0382       | -0.0147   | -0.0308       | -0.0588            |
|                  | t24        | 0.0078   | -0.0074  | 0.1409* | -0.0013 | -0.1457* | 0.0382           | -0.0689             | 0.0209         | 0.0456   | 0.0127  | 0.0218        | -0.0033   | -0.0069       | 0.0126             |
| X-11510          | t0         | -0.0059  | -0.0462  | -0.0412 | 0.0993  | 0.0314   | 0.0135           | -0.0377             | 0.0142         | -0.0421  | -0.0455 | -0.0367       | 0.0296    | 0.0122        | -0.0128            |
|                  | t24        | 0.0157   | -0.1190* | -0.0295 | 0.0214  | 0.0587   | 0.0828           | -0.0308             | 0.011          | -0.0082  | -0.0502 | 0.0017        | -0.0329   | 0.0013        | -0.005             |
| X-11513          | t0         | N/D      | N/D      | N/D     | N/D     | N/D      | N/D              | N/D                 | N/D            | N/D      | N/D     | N/D           | N/D       | N/D           | N/D                |
|                  | t24        | -0.0016  | 0.0248   | 0.0008  | -0.0313 | 0.0016   | -0.0291          | 0.0745              | -0.0378        | -0.0033  | -0.0064 | -0.0098       | 0.0049    | -0.0406       | -0.0235            |
| X-11521          | t0         | -0.0412  | -0.1049* | 0.0799  | -0.0348 | 0.1547*  | -0.0074          | 0.0124              | 0.1235*        | 0.0169   | -0.0833 | -0.0259       | -0.0137   | -0.0384       | 0.0029             |
|                  | t24        | 0.0144   | -0.0436  | 0.0002  | 0.0153  | 0.4784*  | -0.0001          | 0.0177              | -0.0136        | -0.0019  | -0.0088 | -0.0215       | -0.0222   | -0.0472       | 0.0016             |
| X-11522          | t0         | N/D      | N/D      | N/D     | N/D     | N/D      | N/D              | N/D                 | N/D            | N/D      | N/D     | N/D           | N/D       | N/D           | N/D                |
|                  | t24        | -0.0253  | -0.0028  | -0.0402 | -0.0121 | 0.0981   | -0.0233          | -0.0003             | 0.0018         | 0.0274   | 0.0224  | 0.5320*       | -0.0074   | -0.0031       | 0.0073             |
| X-11529          | t0         | -0.0029  | -0.0189  | 0.0017  | 0.0112  | 0.0043   | -0.0013          | -0.0051             | -0.0062        | -0.0467  | -0.0164 | 0.0497        | 0.0007    | -0.0178       | 0.0317             |
|                  | t24        | -0.003   | 0.0107   | -0.0108 | 0       | 0.0012   | 0.02             | -0.0188             | 0.0213         | 0.0019   | -0.0396 | 0.031         | 0.0183    | -0.0208       | 0.0141             |
| X-11530          | t0         | N/D      | N/D      | N/D     | N/D     | N/D      | N/D              | N/D                 | N/D            | N/D      | N/D     | N/D           | N/D       | N/D           | N/D                |
|                  | t24        | -0.0119  | 0.0062   | -0.03   | -0.0171 | 0.1315*  | -0.0198          | -0.0004             | 0.0017         | 0.0119   | 0.0156  | 0.5309*       | -0.0073   | -0.0125       | 0.015              |

| Biochemical Name | Time Point | SIRS     | UCS      | SS       | SShock   | SNS     | <i>S. aureus</i> | <i>S. pneumonia</i> | <i>E. coli</i> | Gender   | Race    | Liver Disease | Hepatitis | Alcohol Abuse | Neoplastic Disease |
|------------------|------------|----------|----------|----------|----------|---------|------------------|---------------------|----------------|----------|---------|---------------|-----------|---------------|--------------------|
| X-11533          | t0         | N/D      | N/D      | N/D      | N/D      | N/D     | N/D              | N/D                 | N/D            | N/D      | N/D     | N/D           | N/D       | N/D           | N/D                |
|                  | t24        | -0.006   | -0.0141  | 0.0164   | -0.0077  | 0.0017  | 0.0743           | 0.042               | -0.0077        | 0.1895*  | -0.0285 | 0.0093        | -0.0123   | -0.0407       | 0.0663             |
| X-11538          | t0         | -0.0035  | 0.0031   | -0.0059  | -0.0177  | 0.2549* | -0.0549          | -0.0005             | -0.0113        | 0.0653   | 0.0084  | 0.5299*       | -0.0181   | 0.0456        | -0.0521            |
|                  | t24        | -0.0155  | 0.0001   | -0.0161  | -0.0052  | 0.1119* | -0.0278          | -0.0068             | -0.0054        | -0.0125  | -0.0433 | 0.6269*       | -0.011    | 0.0397        | 0.0047             |
| X-11542          | t0         | N/D      | N/D      | N/D      | N/D      | N/D     | N/D              | N/D                 | N/D            | N/D      | N/D     | N/D           | N/D       | N/D           | N/D                |
|                  | t24        | 0.1577*  | 0.0328   | -0.0867  | -0.1584* | 0.0039  | 0.0115           | -0.0484             | 0.0094         | -0.0489  | 0.0123  | -0.0237       | -0.0377   | 0.0265        | 0.0049             |
| X-11546          | t0         | -0.0044  | -0.0266  | 0.1463*  | 0.0055   | -0.028  | 0.1416*          | -0.007              | -0.0008        | -0.0086  | 0.0295  | 0.4209*       | 0.0018    | -0.0062       | 0.0095             |
|                  | t24        | -0.0061  | -0.0168  | 0.1177*  | 0.0094   | -0.0207 | 0.2318*          | -0.0035             | 0.0006         | -0.0043  | 0.0287  | 0.4042*       | 0.0033    | -0.0029       | 0.0115             |
| X-11550          | t0         | -0.0039  | 0.0027   | 0.0106   | -0.0006  | -0.005  | -0.0254          | 0.005               | 0.1582*        | -0.0746  | 0.0866  | -0.0163       | 0.0687    | -0.041        | -0.0455            |
|                  | t24        | -0.028   | 0.085    | 0.1038*  | -0.0443  | -0.0703 | 0.0462           | 0.1056*             | 0.0282         | -0.0068  | 0.0109  | -0.011        | -0.014    | -0.0891       | -0.0291            |
| X-11564          | t0         | N/D      | N/D      | N/D      | N/D      | N/D     | N/D              | N/D                 | N/D            | N/D      | N/D     | N/D           | N/D       | N/D           | N/D                |
|                  | t24        | 0.0037   | 0.0118   | -0.0375  | -0.0109  | 0.1400* | 0.062            | 0.0144              | -0.0002        | 0.0055   | -0.055  | 0.1213*       | 0.0058    | 0.031         | 0.0661             |
| X-11593          | t0         | -0.0454  | -0.1698* | 0.0245   | 0.0172   | 0.0905  | -0.0676          | 0.0694              | -0.0005        | -0.0472  | 0.0244  | -0.0239       | 0.0496    | -0.1749*      | 0.0243             |
|                  | t24        | -0.0432  | -0.2557* | 0.0145   | 0.0183   | 0.0436  | -0.004           | 0.1805*             | -0.0202        | 0.0161   | -0.0034 | 0.0139        | -0.0257   | -0.3715*      | 0.1546*            |
| X-11687          | t0         | -0.0216  | -0.0626  | 0.0046   | 0.0262   | 0.4046* | -0.0612          | 0.0358              | -0.004         | -0.0242  | -0.0276 | -0.0322       | 0.0846    | -0.0263       | 0.1461*            |
|                  | t24        | -0.0112  | -0.0373  | -0.0061  | 0.0233   | 0.4418* | -0.0118          | 0.0817              | -0.0095        | -0.0095  | -0.0314 | -0.0035       | 0.0333    | -0.033        | 0.0957             |
| X-11727          | t0         | 0.0177   | -0.0186  | -0.0019  | 0.0964   | -0.0841 | 0.0365           | -0.1434*            | -0.0471        | -0.0032  | -0.0145 | -0.0101       | -0.0143   | 0.0158        | 0.0155             |
|                  | t24        | 0.0058   | -0.2040* | -0.0118  | 0.2451*  | -0.0047 | -0.0088          | 0.0065              | -0.003         | 0.0082   | -0.0139 | 0.0107        | -0.1399*  | -0.0087       | 0.0433             |
| X-11786          | t0         | 0.013    | 0.1644*  | -0.0048  | -0.0235  | -0.0287 | 0.0361           | -0.0111             | -0.1329*       | 0.0325   | 0.0253  | -0.0089       | -0.0139   | -0.0037       | 0.0286             |
|                  | t24        | 0.0991   | 0.0424   | -0.0354  | -0.0059  | -0.0574 | -0.0161          | 0.004               | -0.0137        | 0.0347   | 0.0532  | -0.0202       | -0.0008   | -0.0018       | 0.0201             |
| X-11787          | t0         | 0.0017   | 0.0066   | -0.0485  | -0.0003  | 0.0296  | 0.013            | -0.0704             | -0.0153        | -0.0753  | 0.0156  | -0.1859*      | 0.015     | -0.0378       | 0.0223             |
|                  | t24        | -0.0056  | 0.012    | -0.0477  | 0.0007   | 0.0094  | 0.0135           | -0.045              | 0.0079         | -0.0319  | 0.0178  | -0.0536       | 0.0077    | -0.1183*      | 0.0217             |
| X-11793          | t0         | -0.0076  | 0.0827   | -0.0334  | -0.0044  | 0.0033  | -0.0271          | -0.0097             | 0.0321         | 0.0038   | 0.2368* | 0.0209        | 0.003     | -0.003        | -0.0151            |
|                  | t24        | 0.0086   | 0.1443*  | -0.1042* | -0.0598  | 0.0209  | -0.075           | 0.0189              | 0.0054         | -0.02    | 0.0059  | 0.1893*       | -0.032    | -0.0039       | 0.0103             |
| X-11795          | t0         | -0.0181  | 0.0057   | -0.018   | -0.0041  | 0.0375  | -0.0025          | 0.0149              | -0.0432        | 0.0444   | 0.0071  | 0.1637*       | -0.0222   | -0.056        | 0.0098             |
|                  | t24        | 0.007    | -0.0127  | -0.0382  | 0.0481   | 0.0006  | -0.0106          | -0.0084             | -0.0618        | -0.0173  | 0.0038  | 0.053         | -0.0021   | -0.0364       | -0.0462            |
| X-11799          | t0         | N/D      | N/D      | N/D      | N/D      | N/D     | N/D              | N/D                 | N/D            | N/D      | N/D     | N/D           | N/D       | N/D           | N/D                |
|                  | t24        | 0.0004   | 0.003    | 0.0178   | -0.0374  | 0.0132  | 0.0076           | -0.0027             | -0.0244        | 0.0162   | -0.0226 | -0.0065       | -0.0023   | -0.0274       | -0.0155            |
| X-11809          | t0         | -0.0098  | 0.0287   | 0.007    | -0.078   | 0.0313  | -0.0726          | 0.0336              | -0.0041        | 0.0092   | -0.0252 | -0.0169       | -0.005    | 0.1218*       | -0.0319            |
|                  | t24        | 0.0592   | 0.0182   | 0.0327   | -0.0937  | -0.0145 | 0.1527*          | 0.0125              | -0.0154        | -0.1166* | -0.0518 | -0.0161       | -0.0008   | 0.0053        | 0.017              |
| X-11818          | t0         | N/D      | N/D      | N/D      | N/D      | N/D     | N/D              | N/D                 | N/D            | N/D      | N/D     | N/D           | N/D       | N/D           | N/D                |
|                  | t24        | -0.0383  | 0.0494   | -0.0255  | 0.054    | -0.016  | 0.0575           | -0.0242             | -0.017         | -0.0028  | 0.0459  | -0.0268       | 0.0306    | -0.0044       | -0.0133            |
| X-11826          | t0         | -0.0277  | -0.0401  | -0.0149  | 0.0562   | 0.3104* | -0.0179          | -0.0318             | -0.0212        | -0.0169  | -0.0026 | -0.0891       | -0.0219   | -0.02         | 0.0126             |
|                  | t24        | 0.0145   | -0.1434* | 0.003    | 0.0242   | 0.0769  | 0.0923           | -0.0107             | -0.0269        | -0.0146  | -0.0216 | -0.0164       | -0.04     | -0.0474       | -0.0499            |
| X-11832          | t0         | N/D      | N/D      | N/D      | N/D      | N/D     | N/D              | N/D                 | N/D            | N/D      | N/D     | N/D           | N/D       | N/D           | N/D                |
|                  | t24        | -0.0304  | -0.0099  | 0.1276*  | 0.0164   | -0.0198 | -0.0187          | 0.2244*             | -0.0033        | -0.0456  | -0.0189 | -0.0127       | -0.0462   | -0.0102       | -0.0041            |
| X-11838          | t0         | -0.0571  | 0.0532   | -0.004   | 0.0204   | -0.0041 | -0.0172          | 0.0628              | -0.0363        | -0.0591  | 0.0382  | 0.0188        | 0.0137    | 0.0163        | -0.0069            |
|                  | t24        | -0.3379* | 0.0413   | 0.0056   | 0.0319   | -0.0529 | -0.0728          | -0.0138             | 0.0038         | -0.0264  | 0.0043  | 0.0212        | -0.0032   | 0.0028        | -0.0157            |
| X-11843          | t0         | 0.0074   | -0.0285  | -0.0037  | 0.0131   | 0.0055  | -0.0075          | 0.0265              | -0.0042        | -0.0031  | -0.0261 | -0.0753       | 0         | -0.0178       | -0.0149            |
|                  | t24        | 0.0791   | -0.0426  | -0.0025  | 0.0002   | -0.028  | 0.0016           | 0.024               | -0.0219        | 0.0471   | -0.0641 | -0.0215       | -0.0215   | -0.0419       | -0.0092            |
| X-11850          | t0         | 0.0405   | -0.0088  | -0.0265  | -0.0088  | -0.0032 | 0.0017           | -0.0048             | 0.0123         | -0.0227  | 0.0055  | -0.1180*      | 0.0023    | -0.0285       | -0.0389            |
|                  | t24        | 0.2236*  | -0.0306  | 0.0001   | -0.0095  | -0.0037 | 0.0102           | -0.0207             | -0.01          | 0.0264   | -0.0315 | -0.0237       | -0.0078   | -0.0405       | -0.0153            |
| X-11853          | t0         | -0.0271  | 0.0303   | 0.0194   | -0.0008  | 0.0007  | -0.1743*         | 0.0037              | 0.0267         | -0.0594  | 0.0244  | -0.0154       | 0.0373    | 0.0036        | -0.0026            |
|                  | t24        | -0.0166  | 0.1202*  | 0.0264   | -0.0245  | -0.0238 | 0.0137           | 0.0117              | 0.0102         | 0.0848   | 0.0175  | -0.0127       | -0.0498   | -0.0206       | -0.0671            |
| X-11859          | t0         | 0.0069   | 0.0113   | -0.0013  | -0.0066  | 0.0092  | 0.0067           | 0.0106              | 0.0526         | -0.1087* | 0.2857* | -0.0059       | 0.054     | -0.0501       | 0.003              |
|                  | t24        | -0.0312  | 0.1617*  | 0.0357   | -0.0368  | -0.092  | 0.2397*          | 0.0103              | 0.0168         | 0.0125   | 0.0348  | -0.0092       | 0.0114    | -0.0307       | -0.0082            |
| X-11861          | t0         | N/D      | N/D      | N/D      | N/D      | N/D     | N/D              | N/D                 | N/D            | N/D      | N/D     | N/D           | N/D       | N/D           | N/D                |
|                  | t24        | -0.0197  | -0.012   | -0.0094  | 0.0334   | 0.0004  | -0.0083          | 0.0381              | 0.0093         | 0.0266   | 0.0724  | 0.0193        | 0.0246    | -0.048        | -0.0608            |
| X-11868          | t0         | N/D      | N/D      | N/D      | N/D      | N/D     | N/D              | N/D                 | N/D            | N/D      | N/D     | N/D           | N/D       | N/D           | N/D                |
|                  | t24        | -0.0486  | 0.0177   | -0.0144  | -0.0259  | 0.0981  | 0.0969           | 0.0505              | 0.0404         | -0.0281  | 0.0042  | 0.1049*       | 0.0035    | -0.0483       | 0.0261             |



| Biochemical Name | Time Point | SIRS     | UCS     | SS      | SShock   | SNS      | <i>S. aureus</i> | <i>S. pneumonia</i> | <i>E. coli</i> | Gender   | Race     | Liver Disease | Hepatitis | Alcohol Abuse | Neoplastic Disease |
|------------------|------------|----------|---------|---------|----------|----------|------------------|---------------------|----------------|----------|----------|---------------|-----------|---------------|--------------------|
| X-12442          | t0         | 0.0216   | -0.0028 | -0.013  | -0.0316  | 0.1779*  | -0.0371          | 0.0124              | 0.0197         | 0.0401   | 0.0035   | 0.3026*       | -0.0015   | 0.0492        | -0.0202            |
|                  | t24        | 0.0125   | -0.005  | -0.0169 | -0.0263  | 0.0399   | -0.0781          | 0.0078              | -0.0061        | 0.0124   | 0.0065   | 0.4420*       | -0.0269   | 0.0701        | 0.067              |
| X-12443          | t0         | N/D      | N/D     | N/D     | N/D      | N/D      | N/D              | N/D                 | N/D            | N/D      | N/D      | N/D           | N/D       | N/D           | N/D                |
|                  | t24        | 0.0259   | 0.0036  | 0.0029  | -0.0119  | -0.0448  | 0.012            | 0.0633              | 0.001          | -0.0067  | 0.1447*  | -0.0054       | 0.2076*   | 0.0155        | 0.0743             |
| X-12450          | t0         | 0.0104   | -0.0324 | -0.0086 | -0.0078  | 0.0386   | -0.0271          | 0.0552              | 0.2989*        | -0.0243  | 0.0161   | -0.0031       | 0.0287    | 0.0124        | -0.0005            |
|                  | t24        | N/D      | N/D     | N/D     | N/D      | N/D      | N/D              | N/D                 | N/D            | N/D      | N/D      | N/D           | N/D       | N/D           | N/D                |
| X-12458          | t0         | 0.0236   | -0.0777 | 0.0105  | -0.0339  | 0.0185   | -0.0136          | 0.035               | -0.1415*       | -0.0344  | -0.014   | 0.006         | -0.0478   | 0.0156        | -0.0285            |
|                  | t24        | 0.0264   | 0.0058  | -0.0163 | -0.1551* | 0.0436   | -0.0394          | 0.0996              | 0.0117         | -0.0154  | -0.1147* | 0.3519*       | 0.0033    | 0.0315        | 0.0552             |
| X-12465          | t0         | -0.008   | -0.0199 | -0.0336 | 0.0437   | 0.0414   | 0.0408           | -0.0167             | -0.0116        | 0.0396   | -0.1781* | -0.029        | -0.0431   | 0.0079        | 0.0038             |
|                  | t24        | -0.0623  | -0.0409 | 0.011   | 0.0181   | 0.1666*  | -0.013           | 0.0886              | -0.046         | 0.0373   | -0.007   | -0.0141       | -0.0575   | 0.0463        | 0.017              |
| X-12510          | t0         | 0.0784   | 0.0275  | -0.0455 | -0.0715  | -0.0201  | 0.0227           | -0.0068             | -0.0163        | -0.1143* | 0.0212   | 0.0225        | 0.0273    | -0.0057       | -0.0458            |
|                  | t24        | 0.0055   | 0.0238  | -0.0549 | -0.007   | 0.0156   | 0.0039           | 0.007               | 0.0074         | -0.0092  | 0.0609   | 0.4793*       | 0.0463    | -0.0095       | -0.0325            |
| X-12644          | t0         | 0.2006*  | 0.0393  | -0.0175 | -0.0615  | -0.0062  | -0.0058          | -0.0225             | 0.0406         | 0.0125   | -0.0212  | -0.0829       | 0.0014    | -0.066        | -0.1856*           |
|                  | t24        | 0.0491   | -0.0121 | -0.0163 | 0.0307   | -0.1357* | -0.0528          | -0.0773             | 0.0125         | 0.2881*  | 0.0155   | -0.0577       | -0.0348   | -0.1278*      | -0.0062            |
| X-12660          | t0         | 0.004    | 0.1429* | -0.0115 | -0.0117  | -0.0138  | -0.0562          | 0.016               | -0.0855        | 0.0531   | -0.2229* | -0.018        | -0.0136   | 0.0291        | -0.0078            |
|                  | t24        | 0.0528   | -0.0301 | -0.0935 | 0.078    | -0.0475  | -0.0078          | 0.0925              | -0.0122        | -0.0048  | -0.0083  | -0.0152       | -0.0203   | 0.0044        | -0.0253            |
| X-12688          | t0         | -0.0655  | 0.0216  | 0.0124  | -0.0149  | 0.3723*  | 0.0205           | -0.0064             | -0.0215        | -0.0117  | -0.0237  | 0.0127        | -0.007    | -0.0084       | -0.0219            |
|                  | t24        | -0.011   | -0.0028 | 0.0387  | -0.0849  | 0.3014*  | 0.0358           | -0.0059             | -0.0094        | -0.0151  | -0.0242  | 0.0455        | -0.0323   | -0.0204       | -0.003             |
| X-12690          | t0         | -0.0109  | -0.0075 | 0.0133  | 0.0049   | 0.6056*  | -0.0131          | -0.02               | 0.0193         | 0.0013   | -0.009   | -0.1523*      | 0.0048    | -0.0184       | -0.0079            |
|                  | t24        | N/D      | N/D     | N/D     | N/D      | N/D      | N/D              | N/D                 | N/D            | N/D      | N/D      | N/D           | N/D       | N/D           | N/D                |
| X-12695          | t0         | -0.0144  | -0.0364 | 0.0087  | -0.0009  | 0.1241*  | -0.0685          | 0.0304              | -0.0166        | -0.042   | -0.039   | 0.2769*       | -0.0019   | 0.0197        | 0.0486             |
|                  | t24        | 0.0045   | -0.0495 | 0.0032  | -0.0019  | 0.3014*  | -0.0364          | 0.0251              | -0.0106        | 0.0015   | -0.025   | 0.4829*       | -0.0358   | -0.0208       | 0.0335             |
| X-12707          | t0         | -0.0209  | -0.0453 | -0.0142 | 0.0124   | 0.1611*  | -0.0459          | -0.005              | 0.0106         | -0.0003  | -0.1169* | -0.0091       | -0.0105   | -0.0339       | 0.3712*            |
|                  | t24        | N/D      | N/D     | N/D     | N/D      | N/D      | N/D              | N/D                 | N/D            | N/D      | N/D      | N/D           | N/D       | N/D           | N/D                |
| X-12742          | t0         | 0.0106   | -0.0178 | -0.0103 | 0.0162   | -0.0071  | -0.0314          | -0.0239             | 0.0092         | 0.0225   | 0.0019   | -0.0231       | -0.1505*  | 0.4343*       | 0.3158*            |
|                  | t24        | -0.0136  | -0.0635 | -0.011  | 0.1023*  | 0.0279   | 0.0031           | 0.0335              | -0.0355        | 0.1613*  | -0.0119  | 0.0021        | -0.1212*  | 0.0427        | 0.1786*            |
| X-12749          | t0         | -0.0012  | -0.001  | -0.0416 | 0.0151   | 0.3700*  | -0.0059          | -0.0088             | 0.0175         | -0.0116  | 0.0154   | -0.0203       | 0.0227    | -0.016        | -0.0245            |
|                  | t24        | -0.0066  | 0.0063  | -0.043  | -0.017   | 0.1041*  | 0.0407           | -0.0086             | -0.0018        | 0.0062   | -0.0082  | -0.1555*      | 0.0107    | -0.0037       | 0.0931             |
| X-12756          | t0         | N/D      | N/D     | N/D     | N/D      | N/D      | N/D              | N/D                 | N/D            | N/D      | N/D      | N/D           | N/D       | N/D           | N/D                |
|                  | t24        | -0.1943* | 0.2632* | -0.0111 | 0.076    | -0.0628  | -0.0022          | 0.0299              | -0.0765        | 0.0108   | 0.0211   | -0.0117       | -0.0109   | -0.0356       | -0.0203            |
| X-12775          | t0         | -0.058   | 0.0696  | -0.0125 | 0.0069   | 0.0107   | 0.0352           | -0.0238             | 0.0851         | 0.0382   | 0.0293   | -0.0302       | -0.0252   | 0.0383        | 0.0173             |
|                  | t24        | -0.0415  | -0.0034 | 0.1887* | -0.0046  | 0.0003   | -0.0092          | 0.0085              | -0.0311        | 0.069    | 0.1280*  | -0.0263       | -0.0627   | 0.2507*       | 0.0081             |
| X-12776          | t0         | -0.0659  | 0.0369  | -0.007  | 0.0045   | 0.0106   | 0.0138           | 0.0137              | 0.0069         | 0.1076*  | 0.2226*  | -0.0055       | 0.0054    | 0.0053        | 0.0199             |
|                  | t24        | N/D      | N/D     | N/D     | N/D      | N/D      | N/D              | N/D                 | N/D            | N/D      | N/D      | N/D           | N/D       | N/D           | N/D                |
| X-12792          | t0         | N/D      | N/D     | N/D     | N/D      | N/D      | N/D              | N/D                 | N/D            | N/D      | N/D      | N/D           | N/D       | N/D           | N/D                |
|                  | t24        | -0.0034  | 0.0296  | -0.0509 | 0.0175   | -0.0143  | 0.0054           | 0.0486              | -0.0004        | -0.0081  | -0.0001  | -0.0205       | -0.009    | -0.0268       | 0.0373             |
| X-12794          | t0         | -0.1020* | -0.0011 | 0.1800* | 0.0072   | 0.2975*  | -0.0404          | 0.0018              | 0.0154         | -0.0042  | -0.0633  | -0.0881       | -0.0163   | 0.0118        | 0.1174*            |
|                  | t24        | -0.0683  | -0.0382 | 0.1906* | 0.0177   | 0.0428   | -0.0098          | 0.0534              | -0.0031        | 0.0282   | -0.0573  | -0.0048       | -0.0618   | 0.0143        | 0.0129             |
| X-12802          | t0         | -0.0759  | 0.0072  | 0.012   | 0.0019   | 0.4061*  | -0.0181          | 0.0529              | -0.0126        | -0.0288  | -0.0453  | -0.0425       | -0.0309   | -0.001        | 0.0498             |
|                  | t24        | -0.0227  | -0.0377 | -0.002  | 0.0593   | 0.4713*  | -0.0132          | 0.1150*             | -0.0186        | 0.0066   | -0.0023  | -0.0058       | -0.0306   | -0.042        | -0.0086            |
| X-12822          | t0         | N/D      | N/D     | N/D     | N/D      | N/D      | N/D              | N/D                 | N/D            | N/D      | N/D      | N/D           | N/D       | N/D           | N/D                |
|                  | t24        | -0.0216  | -0.0128 | 0.0151  | -0.0068  | 0.2053*  | 0.2259*          | -0.0075             | -0.0261        | 0.0173   | -0.0554  | -0.0174       | -0.0139   | -0.0381       | 0.0692             |
| X-12844          | t0         | -0.0512  | -0.0015 | -0.0466 | 0.4457*  | 0.0278   | 0.0098           | -0.0467             | 0.0571         | -0.0552  | 0.0106   | -0.0293       | -0.0849   | -0.0208       | 0.0009             |
|                  | t24        | -0.005   | -0.015  | -0.0203 | 0.3986*  | 0.0156   | -0.0282          | -0.0564             | -0.0106        | 0.0255   | 0.0197   | 0.0015        | -0.0701   | -0.0244       | 0.0068             |
| X-12846          | t0         | N/D      | N/D     | N/D     | N/D      | N/D      | N/D              | N/D                 | N/D            | N/D      | N/D      | N/D           | N/D       | N/D           | N/D                |
|                  | t24        | -0.0603  | -0.0338 | -0.0203 | 0.0765   | 0.2384*  | 0.0039           | -0.0202             | -0.0185        | 0.0085   | -0.0264  | -0.0264       | -0.0305   | -0.0161       | 0.0678             |
| X-12849          | t0         | -0.0103  | -0.0327 | -0.0196 | 0.2346*  | 0.0253   | -0.0386          | 0.0697              | -0.0089        | 0.0038   | -0.0071  | 0.0339        | -0.0127   | -0.0294       | 0.0419             |
|                  | t24        | N/D      | N/D     | N/D     | N/D      | N/D      | N/D              | N/D                 | N/D            | N/D      | N/D      | N/D           | N/D       | N/D           | N/D                |
| X-12850          | t0         | -0.025   | -0.013  | 0.0198  | -0.0299  | 0.0944   | 0.0176           | 0.0263              | -0.0211        | -0.1628* | 0.0011   | 0.0451        | 0.018     | 0.0176        | 0.016              |
|                  | t24        | -0.0052  | -0.0078 | 0.0059  | -0.0198  | 0.1345*  | 0.0489           | -0.0101             | -0.015         | -0.0479  | -0.0046  | 0.0087        | 0.0055    | 0.0011        | 0.0565             |



| Biochemical Name | Time Point | SIRS     | UCS     | SS      | SShock  | SNS     | <i>S. aureus</i> | <i>S. pneumonia</i> | <i>E. coli</i> | Gender  | Race     | Liver Disease | Hepatitis | Alcohol Abuse | Neoplastic Disease |
|------------------|------------|----------|---------|---------|---------|---------|------------------|---------------------|----------------|---------|----------|---------------|-----------|---------------|--------------------|
| X-12851          | t0         | N/D      | N/D     | N/D     | N/D     | N/D     | N/D              | N/D                 | N/D            | N/D     | N/D      | N/D           | N/D       | N/D           | N/D                |
|                  | t24        | 0.0067   | -0.0289 | -0.0051 | 0.009   | 0.0219  | 0.1033*          | -0.0043             | -0.0141        | -0.0244 | -0.1297* | -0.0085       | -0.0003   | 0.1727*       | 0.0216             |
| X-12855          | t0         | 0.0136   | -0.0249 | -0.0058 | -0.0238 | 0.3531* | -0.0084          | 0.0443              | -0.0323        | 0.1351* | -0.0608  | -0.0068       | -0.0556   | 0.0143        | -0.0175            |
|                  | t24        | 0.0237   | -0.0536 | 0.0026  | 0.0099  | 0.4667* | -0.0154          | 0.0101              | -0.0212        | 0.0171  | -0.0259  | 0.0216        | -0.0326   | 0.0098        | 0.0198             |
| X-12860          | t0         | 0.0228   | -0.0197 | -0.0115 | -0.0332 | 0.1996* | -0.0185          | -0.0085             | -0.0014        | 0.0917  | -0.1229* | -0.0205       | -0.0343   | 0.0005        | -0.0238            |
|                  | t24        | -0.0134  | -0.0215 | -0.0251 | 0.0131  | 0.2307* | -0.0197          | 0.0539              | -0.0201        | 0.0084  | -0.1058* | 0.013         | -0.0459   | -0.02         | 0.044              |
| X-12990          | t0         | 0.0198   | -0.0001 | -0.0292 | -0.0769 | 0.0487  | -0.0908          | -0.0088             | 0.0201         | 0.0168  | 0.068    | 0.0107        | 0.0081    | -0.016        | -0.1613*           |
|                  | t24        | 0.0976   | -0.0041 | 0.0092  | -0.0737 | -0.0086 | -0.0334          | -0.0206             | 0.0027         | 0.006   | -0.0379  | 0.0308        | -0.0064   | 0.1651*       | 0.0215             |
| X-13429          | t0         | -0.0548  | 0.015   | -0.0775 | 0.1713* | -0.0218 | 0.0037           | 0.1013*             | -0.0108        | 0.0158  | -0.0322  | -0.0444       | 0.0027    | -0.0302       | 0.0078             |
|                  | t24        | -0.0049  | 0.0065  | -0.0311 | 0.1930* | -0.0198 | 0.0366           | 0.0956              | 0.0018         | 0.0139  | -0.0913  | -0.0124       | 0.0135    | -0.0032       | -0.0003            |
| X-13435          | t0         | 0.0274   | -0.0615 | -0.0135 | -0.0187 | 0.2643* | -0.0164          | -0.0094             | -0.0323        | 0.0102  | 0.0054   | -0.0549       | -0.0167   | 0.011         | -0.0061            |
|                  | t24        | N/D      | N/D     | N/D     | N/D     | N/D     | N/D              | N/D                 | N/D            | N/D     | N/D      | N/D           | N/D       | N/D           | N/D                |
| X-13465          | t0         | N/D      | N/D     | N/D     | N/D     | N/D     | N/D              | N/D                 | N/D            | N/D     | N/D      | N/D           | N/D       | N/D           | N/D                |
|                  | t24        | 0.0137   | -0.0796 | 0.0031  | 0.0008  | 0.2887* | 0.0476           | -0.005              | -0.0196        | 0.0174  | -0.0906  | -0.0655       | -0.0106   | -0.0645       | 0.0538             |
| X-13553          | t0         | -0.0005  | -0.0264 | 0.0053  | 0.0017  | 0.6056* | -0.026           | 0.0059              | -0.0065        | -0.0336 | -0.0811  | 0.006         | -0.0071   | 0.012         | 0.1006*            |
|                  | t24        | -0.0209  | -0.0314 | -0.017  | 0.0097  | 0.4284* | -0.0117          | 0.0031              | -0.0125        | -0.0118 | -0.05    | 0.0341        | -0.0159   | 0.005         | 0.0682             |
| X-13727          | t0         | N/D      | N/D     | N/D     | N/D     | N/D     | N/D              | N/D                 | N/D            | N/D     | N/D      | N/D           | N/D       | N/D           | N/D                |
|                  | t24        | -0.0098  | -0.0185 | -0.0034 | 0.2732* | 0.0058  | -0.0111          | 0.0149              | -0.0216        | -0.0015 | -0.0062  | -0.0108       | -0.0507   | -0.0258       | 0.0147             |
| X-14588          | t0         | -0.0586  | 0.0292  | -0.0526 | 0.0061  | 0.1869* | -0.024           | 0.0148              | -0.0098        | -0.0251 | -0.0243  | 0.0194        | 0.0309    | 0.0399        | 0.0312             |
|                  | t24        | -0.1783* | -0.0213 | -0.0273 | 0.0508  | 0.0387  | -0.0076          | -0.0094             | -0.0111        | 0.0035  | -0.0122  | 0.04          | -0.1118*  | -0.0332       | 0.012              |
| X-14625          | t0         | N/D      | N/D     | N/D     | N/D     | N/D     | N/D              | N/D                 | N/D            | N/D     | N/D      | N/D           | N/D       | N/D           | N/D                |
|                  | t24        | 0.1960*  | -0.0072 | -0.0196 | 0.0178  | -0.0293 | -0.0029          | -0.014              | 0.0017         | 0.0697  | -0.0068  | -0.019        | -0.0505   | 0.0083        | 0.0212             |
| X-14626          | t0         | -0.0501  | 0.0537  | -0.0322 | 0.072   | -0.0608 | -0.0343          | 0.1368*             | 0.0014         | -0.0081 | 0.0049   | -0.0279       | 0.0404    | -0.0296       | -0.0045            |
|                  | t24        | -0.0213  | -0.004  | -0.0129 | 0.1731* | -0.0056 | 0.022            | 0.2667*             | 0.0167         | 0.0265  | -0.0737  | 0.0096        | -0.0273   | -0.0547       | 0.0042             |
| X-14658          | t0         | -0.0024  | -0.0235 | 0.1746* | -0.0295 | 0.0192  | -0.0053          | 0.2604*             | -0.0085        | -0.0609 | 0.0006   | 0.0303        | -0.0106   | 0.0007        | -0.0006            |
|                  | t24        | -0.0448  | -0.0286 | 0.0231  | -0.0377 | 0.1287* | 0.0206           | 0.0065              | -0.0152        | -0.0581 | -0.0298  | 0.0235        | -0.0065   | 0.0008        | 0.0449             |
| X-14662          | t0         | -0.0035  | -0.014  | 0.1298* | 0.0018  | -0.0144 | 0.1912*          | -0.0008             | 0.0052         | -0.0027 | 0.0245   | 0.3807*       | 0.0025    | -0.0032       | 0.0077             |
|                  | t24        | -0.0042  | -0.0176 | 0.0877  | 0.0021  | -0.0187 | 0.1936*          | -0.0001             | 0.0015         | -0.0068 | 0.0313   | 0.4119*       | 0.0046    | -0.0021       | 0.0116             |
| X-14663          | t0         | -0.0104  | -0.0201 | 0.1360* | 0.0013  | -0.0102 | 0.1466*          | -0.0018             | 0.001          | -0.0117 | 0.0153   | 0.3871*       | -0.0003   | -0.0029       | 0.0182             |
|                  | t24        | -0.0108  | -0.0107 | 0.1249* | 0.0005  | -0.015  | 0.2235*          | 0.0054              | 0.0089         | -0.0038 | 0.0342   | 0.4104*       | 0.0013    | -0.0025       | 0.0246             |

SIRS - systemic inflammatory response; UCS - uncomplicated sepsis; SS - severe sepsis; SShock - septic shock; SNS - sepsis nonsurvivor

**Table S6. Combined Calibration Spiking Solution Concentration [ug/mL] in acetonitrile/water (1:1)**

| Biochemical              | Std A | Std B | Std C | Std D | Std E | Std F  |
|--------------------------|-------|-------|-------|-------|-------|--------|
| 4-Methyl-2-oxopentanoate | 1000  | 2000  | 5000  | 20000 | 50000 | 100000 |
| N-Acetyl-threonine       | 10    | 20    | 50    | 200   | 500   | 1000   |
| 3-Methoxy-L-tyrosine     | 5     | 10    | 25    | 100   | 250   | 500    |
| HPLA                     | 50    | 100   | 250   | 1000  | 2500  | 5000   |
| Pseudouridine            | 20    | 40    | 100   | 400   | 1000  | 2000   |
| 1-Linoleoyl-GPC          | 2.5   | 5     | 25    | 40    | 70    | 100    |
| Butyrylcarnitine         | 2     | 4     | 10    | 40    | 100   | 200    |
| 2-Methylbutyrylcarnitine | 4     | 8     | 20    | 80    | 200   | 400    |
| Hexanoylcarnitine        | 2     | 4     | 10    | 40    | 100   | 200    |
| 4-cis-Decenoylcarnitine  | 40    | 80    | 200   | 800   | 2000  | 4000   |

**Table S7. Monitored Ion Masses for Quantitation**

| Compound                                     | Parent Ion (Q1) | Product Ion (Q3) |
|----------------------------------------------|-----------------|------------------|
| Butyrylcarnitine                             | 232.2 ± 0.5     | 85.0 ± 0.5       |
| Butyrylcarnitine-D <sub>3</sub> (IS)         | 235.2 ± 0.5     | 85.0 ± 0.5       |
| 2-Methylbutyrylcarnitine                     | 246.2 ± 0.5     | 85.0 ± 0.5       |
| 2-Methylbutyrylcarnitine-D <sub>3</sub> (IS) | 249.2 ± 0.5     | 85.0 ± 0.5       |
| Hexanoylcarnitine                            | 260.2 ± 0.5     | 85.0 ± 0.5       |
| Hexanoylcarnitine-D <sub>3</sub> (IS)        | 263.2 ± 0.5     | 85.0 ± 0.5       |
| 4-cis-Decenoylcarnitine                      | 314.2 ± 0.5     | 85.0 ± 0.5       |
| 4-cis-Decenoylcarnitine-D <sub>3</sub> (IS)  | 317.2 ± 0.5     | 85.0 ± 0.5       |
| 4-Methyl-2-oxopentanoate                     | 309.2 ± 0.5     | 182.0 ± 0.5      |
| N-Acetylthreonine                            | 160.1 ± 0.5     | 74.1 ± 0.5       |
| 3-Methoxytyrosine                            | 210.1 ± 0.5     | 193.1 ± 0.5      |
| HPLA                                         | 181.1 ± 0.5     | 163.1 ± 0.5      |
| Pseudouridine                                | 243.1 ± 0.5     | 153.1 ± 0.5      |
| 1-Linoleoyl-GPC                              | 520.5 ± 0.5     | 184.2 ± 0.5      |
| Arachidonoyl-GPC                             | 544.5 ± 0.5     | 184.2 ± 0.5      |
| 4-Methyl-2-oxopentanoate-d <sub>3</sub> (IS) | 313.2 ± 0.5     | 182.0 ± 0.5      |
| N-Acetylthreonine-d <sub>5</sub> (IS)        | 165.1 ± 0.5     | 76.1 ± 0.5       |
| 3-Methoxytyrosine-d <sub>3</sub> (IS)        | 213.1 ± 0.5     | 196.1 ± 0.5      |
| Uridine <sup>13</sup> C <sub>5</sub> (IS)    | 248.1 ± 0.5     | 205.1 ± 0.5      |
| Linoleoyl-GPC d <sub>3</sub> (IS)            | 529.5 ± 0.5     | 193.2 ± 0.5      |

**Table S8. Plasma proteins detected with high confidence.** Two MS-based methods (log-transformed, quantile-normalized AUC of chromatograms after background noise removal and spectral counting) following immunodepletion of abundant proteins.

| $t_0$ protein ID | $t_{24}$ Protein ID | Gene Symbol | Annotation                                                    | $t_0$ Best Sequence        | $t_{24}$ Best Sequence    | Priority score $t_0$ | $t_{24}$ Priority score | AUC $t_0$ ID | AUC $t_{24}$ ID | $t_0$ Spectral Count ID | $t_{24}$ Spectral counts ID | $t_0$ corr. ( $r^2$ ) | $t_{24}$ corr. ( $r^2$ ) |
|------------------|---------------------|-------------|---------------------------------------------------------------|----------------------------|---------------------------|----------------------|-------------------------|--------------|-----------------|-------------------------|-----------------------------|-----------------------|--------------------------|
| IP100022895.7    | IP100022895.7       | A1BG        | alpha-1-B glycoprotein                                        | VTLTCVAPLSGVDFQLR          | CEGPDPVTFELLR             | 1                    | 1                       | 1            | 1               | 1                       | 1                           | 0.366                 | 0.254                    |
| IP100478003.1    | IP100478003.1       | A2M         | Alpha-2-macroglobulin                                         | AFQPPFVELTMPYSVIR          | VSNQTLSLFFTVLQDVPVR       | 1                    | 1                       | 1            | 1               | 1                       | 1                           | 0.93                  | 0.842                    |
| IP100328762.4    | IP100328762.5       | ABCA13      | ATP-binding cassette sub-family A (ABC1) member 13            | YIYELLN                    | YIYELLN                   | 1                    | 2                       | 1            | 1               | 0                       | 0                           |                       |                          |
| IP100021428.1    |                     | ACTA1       | Actin, alpha skeletal muscle                                  | AGFAGDDAPR                 |                           | 1                    |                         | 1            | 0               | 0                       | 0                           |                       |                          |
| IP100008603.1    | IP100008603.1       | ACTA2       | actin alpha 2 smooth muscle aorta                             | AGFAGDDAPR                 | AGFAGDDAPR                | 1                    | 2                       | 1            | 1               | 0                       | 0                           |                       |                          |
| IP100021439.1    | IP100021439.1       | ACTB        | actin beta                                                    | AGFAGDDAPR                 | AGFAGDDAPR                | 1                    | 1                       | 1            | 1               | 0                       | 0                           |                       |                          |
| IP100003269.1    | IP100003269.1       | ACTBL2      | actin beta-like 2                                             | SYELPDGQVITIGNER           | VAPDEHPILLTEAPLNPK        | 1                    | 2                       | 1            | 1               | 0                       | 0                           |                       |                          |
| IP100020019.1    | IP100020019.1       | ADIPOQ      | adiponectin C1Q and collagen domain containing                | GDIGETGVPGAEGPR            | SAFVGLTEYVTPINMPIR        | 1                    | 2                       | 1            | 1               | 0                       | 0                           |                       |                          |
|                  | IP100004344.1       | AF4         | AF4/FMR2 family member 4                                      |                            | YNPSK                     | 1                    | 1                       | 0            | 1               | 0                       | 0                           |                       |                          |
| IP100019943.1    | IP100019943.1       | AFM         | afamin                                                        | TINPAVDHCK                 | LKHELTEELQSLFTNFANVVDK    | 1                    | 1                       | 1            | 1               | 1                       | 1                           | 0.808                 | 0.743                    |
| IP100022443.1    | IP100022443.1       | AFP         | alpha-fetoprotein                                             | YIQESQALAK                 | CCQQEQEVCFAEEGQK          | 1                    | 1                       | 1            | 1               | 0                       | 0                           |                       |                          |
| 15079348         | IP100032220.3       | AGT         | angiotensinogen (serpin peptidase inhibitor clade A member 8) | SLDFTELDVAEEK              | SLDFTELDVAEEK             | 1                    | 1                       | 1            | 1               | 1                       | 1                           | 0.435                 | 0.636                    |
| IP100022431.1    | IP100022431.2       | AHSG        | alpha-2-HS-glycoprotein                                       | HTFMGVVSLGSPGSEVSHPR       | EHAVEGDCDFQLLK            | 1                    | 1                       | 1            | 1               | 1                       | 1                           | 0.327                 | 0.519                    |
|                  |                     | ALB         | Serum albumin                                                 |                            |                           |                      |                         | 0            | 0               | 1                       | 1                           | 0.886                 |                          |
| IP100022426.1    | IP100022426.1       | AMBP        | alpha-1-microglobulin/bikunin precursor                       | AFIQLWAFDAVK               | AFIQLWAFDAVK              | 1                    | 1                       | 1            | 1               | 1                       | 1                           | 0.514                 | 0.628                    |
| IP100022391.1    | IP100022391.1       | APCS        | amyloid P component serum                                     | AVSLFSYNTQGR               | IVLGEQDSYGGK              | 1                    | 1                       | 1            | 1               | 1                       | 1                           | 0.671                 | 0.497                    |
| 253362           | IP100021841.1       | APOA1       | Apolipoprotein A-I                                            | VKDLATVYVDVLK              | VKDLATVYVDVLK             | 1                    | 1                       | 1            | 1               | 1                       | 1                           | 0.912                 | 0.884                    |
| 671882           | IP100021854.1       | APOA2       | apolipoprotein A-II                                           | EPCVESLVSQYFQTVTDYDK       | KAGTELVNFSLVFELGTQPATQ    | 1                    | 1                       | 1            | 1               | 1                       | 1                           | 0.852                 | 0.573                    |
| IP100304273.2    | IP100847179.1       | APOA4       | apolipoprotein A-IV                                           | SLAELGGHLDQVVEFR           | LGEVNTYAGDLQK             | 1                    | 1                       | 1            | 1               | 1                       | 1                           | 0.854                 | 0.81                     |
| 225311           | IP100022229.1       | APOB        | Apolipoprotein B-100                                          | LLSEPINIDALEMR             | LSLESLSYFSIESSTK          | 1                    | 1                       | 1            | 1               | 1                       | 1                           | 0.902                 | 0.903                    |
| IP100021855.1    | IP100021855.1       | APOC1       | apolipoprotein C-I                                            | TPDVSALDKLK                | LKEFGNTLEDK               | 1                    | 1                       | 1            | 1               | 1                       | 1                           | 0.416                 | 0.18                     |
| IP100021856.3    | IP100021856.3       | APOC2       | apolipoprotein C-II                                           | STAAMSTYTGIFTDQVLSVLK      | STAAMSTYTGIFTDQVLSVLK     | 1                    | 1                       | 1            | 1               | 1                       | 1                           | 0.493                 | 0.617                    |
| IP100021857.1    | IP100021857.1       | APOC3       | apolipoprotein C-III                                          | DALSSVQESQVAQQAR           | DALSSVQESQVAQQAR          | 1                    | 1                       | 1            | 1               | 1                       | 1                           | 0.474                 | 0.447                    |
| IP100022731.1    | IP100022731.1       | APOC4       | apolipoprotein C-IV                                           | DGWQWFWSPSTFR              | DGWQWFWSPSTFR             | 1                    | 2                       | 1            | 1               | 0                       | 0                           |                       |                          |
| IP100006662.1    | IP100006662.1       | APOD        | apolipoprotein D                                              | CPNPPVQENFDVVK             | CPNPPVQENFDVVK            | 1                    | 1                       | 1            | 1               | 1                       | 1                           | 0.418                 | 0.397                    |
| 15826311         | IP100021842.1       | APOE        | apolipoprotein E                                              | GEVQAMLGQSTTELR            | GEVQAMLGQSTTELR           | 1                    | 1                       | 1            | 1               | 1                       | 1                           | 0.596                 | 0.749                    |
|                  |                     | APOF        | Apolipoprotein F                                              |                            |                           |                      |                         | 0            | 0               | 1                       | 1                           | 0.05                  |                          |
| IP100298828.3    | IP100298828.3       | APOH        | apolipoprotein H (beta-2-glycoprotein I)                      | ATFGCHDGYSLDGPEEIECTK      | CSYTEDAQDCGTIEVPK         | 1                    | 1                       | 1            | 1               | 1                       | 1                           | 0.323                 | 0.014                    |
| IP100186903.3    | IP100186903.4       | APOL1       | apolipoprotein L 1                                            | VTEPISAESGEQVER            | VTEPISAESGEQVER           | 1                    | 1                       | 1            | 1               | 1                       | 1                           | 0.105                 | 0.06                     |
| IP100027235.1    |                     | ATR         | Attractin                                                     | GDECQLCEVENR               |                           | 1                    |                         | 1            | 0               | 0                       | 0                           |                       |                          |
| IP100166729.4    | IP100166729.4       | AZGP1       | alpha-2-glycoprotein 1 zinc-binding                           | YSLTYITGLSK                | YSLTYITGLSK               | 1                    | 1                       | 1            | 1               | 1                       | 1                           | 0.75                  | 0.664                    |
| IP100004656.1    | IP100004656.3       | B2M         | beta-2-microglobulin                                          | DWSFVLYYTEFTPEKDEYACR      | SNFLNCYVGFHPSDIEVDLLK     | 1                    | 1                       | 1            | 1               | 1                       | 1                           | 0.671                 | 0.68                     |
| IP100297188.5    | IP100297188.6       | BAI2        | brain-specific angiogenesis inhibitor 2                       | ASPLGEPPPPQANPVVM          | CPPNAGSASR                | 4                    | 1                       | 1            | 1               | 0                       | 0                           |                       |                          |
| IP100022392.1    | IP100022392.1       | C1QA        | complement component 1 q subcomponent A chain                 | SLGFCDDTNN                 | SLGFCDDTNN                | 1                    | 1                       | 1            | 1               | 1                       | 1                           | 0.205                 | 0.238                    |
| IP100477992.1    | IP100477992.1       | C1QB        | complement component 1 q subcomponent B chain                 | LEQGENVFLQATDK             | LEQGENVFLQATDK            | 1                    | 1                       | 1            | 1               | 1                       | 1                           | 0.193                 | 0.215                    |
| IP100022394.2    | IP100022394.2       | C1QC        | complement component 1 q subcomponent C chain                 | FNAVLTNPQGDYDTSTGK         | FNAVLTNPQGDYDTSTGK        | 1                    | 1                       | 1            | 1               | 1                       | 1                           | 0.23                  | 0.218                    |
| IP100296165.5    | IP100296165.6       | C1R         | complement component 1 r subcomponent                         | LPVANPQACENWLR             | LVFQQDFLEPSEGCYDYVK       | 1                    | 1                       | 1            | 1               | 1                       | 1                           | 0.406                 | 0.374                    |
| IP100009793.2    | IP100009793.4       | C1RL        | complement component 1 r subcomponent-like                    | SGLLGYVSGFGMEMGWLTELK      | LGNFPWQAFTSIHR            | 1                    | 1                       | 1            | 1               | 0                       | 0                           |                       |                          |
| IP100017696.1    | IP100017696.1       | C1S         | complement component 1 s subcomponent                         | CVPVCGVPR                  | SNALDIIFQDLTGGK           | 2                    | 1                       | 1            | 1               | 0                       | 1                           | 0.01                  |                          |
| IP100745619.1    | IP100303963.1       | C2          | complement component 2                                        | RHAFILQAVYK                | PICLPCTMEANLALR           | 2                    | 1                       | 1            | 1               | 1                       | 1                           | 0.018                 | 0.004                    |
| IP100783987.1    | IP100783987.2       | C3          | complement component 3                                        | DICEEQVNSLPGSITK           | VQLSNDFFEYMAIEQTIK        | 1                    | 1                       | 1            | 1               | 1                       | 1                           | 0.932                 | 0.843                    |
| 179674           | IP100892547.1       | C4A         | complement component 4A (Rodgers blood group)                 | VTASDPLOTLGSEGALSPGGVASLLR | GLEELQLFSLGSK             | 1                    | 1                       | 1            | 1               | 0                       | 0                           |                       |                          |
| IP100418163.3    | IP100418163.3       | C4B         | complement component 4B (Chido blood group)                   | VTASDPLOTLGSEGALSPGGVASLLR | GLEELQLFSLGSK             | 1                    | 1                       | 1            | 1               | 1                       | 1                           | 0.892                 | 0.871                    |
| IP100021727.1    | IP100021727.1       | C4BPA       | complement component 4 binding protein alpha                  | FSAICQGDGTWSPR             | CEWETPEGCEQVLTGK          | 1                    | 1                       | 1            | 1               | 1                       | 1                           | 0.656                 | 0.294                    |
| IP100025862.1    | IP100025862.2       | C4BPB       | complement component 4 binding protein beta                   | NLCEAMENFMQQLK             | NLCEAMENFMQQLK            | 1                    | 1                       | 1            | 1               | 0                       | 0                           |                       |                          |
| 38016947         | IP100032291.2       | C5          | complement component 5                                        | TDAPDLPEENQAR              | YIYPLDSLTIWIEWPR          | 1                    | 1                       | 1            | 1               | 1                       | 1                           | 0.812                 | 0.6                      |
| IP100009920.2    | IP100879709.3       | C6          | complement component 6                                        | CPINCLLDGFGPWSDCDCPIEK     | CPINCLLDGFGPWSDCDCPIEK    | 1                    | 1                       | 1            | 1               | 1                       | 1                           | 0.528                 | 0.349                    |
| 179716           | IP100296608.6       | C7          | Complement component C7                                       | MPYECGSPSLDCAQDER          | MPYECGSPSLDCAQDER         | 1                    | 1                       | 1            | 1               | 1                       | 1                           | 0.733                 | 0.349                    |
| 901864           | IP100011252.1       | C8A         | complement component 8 alpha polypeptide                      | ALDQVLMFNACR               | AIDEDCSQYEPGPSQK          | 1                    | 1                       | 1            | 1               | 1                       | 1                           | 0.164                 | 0.085                    |
| IP100294395.1    |                     | C8B         | Complement component C8 beta chain                            | DFGTHYITEAVLGGIYEYTLVMNK   |                           | 1                    |                         | 1            | 0               | 0                       | 0                           |                       |                          |
| IP100011261.2    | IP100011261.2       | C8G         | complement component 8 gamma polypeptide                      | YGFCEAADQFVHLDVPR          | VQEAHLTEQIYFPK            | 1                    | 1                       | 1            | 1               | 1                       | 1                           | 0.184                 | 0.015                    |
| IP100022395.1    | IP100022395.1       | C9          | complement component 9                                        | AIEDYINEFSVR               | GTVIDVDFVNWASSINDAPVLISQK | 1                    | 1                       | 1            | 1               | 1                       | 1                           | 0.751                 | 0.103                    |
| IP100410413.1    | IP100789910.3       | C10orf129   | Acyl-coA synthetase mitochondrial, 6 (ACSM6)                  | LIQVAPPK                   | LIQVAPPK                  | 2                    | 4                       | 1            | 1               | 0                       | 0                           |                       |                          |

| $t_0$ protein ID | $t_{24}$ Protein ID | Gene Symbol   | Annotation                                                 | $t_0$ Best Sequence            | $t_{24}$ Best Sequence         | Priority score $t_0$ | $t_{24}$ Priority score | AUC ID | AUC $t_{24}$ ID | $t_0$ Spectral Count ID | $t_{24}$ Spectral counts ID | $t_0$ corr. ( $r^2$ ) | $t_{24}$ corr. ( $r^2$ ) |
|------------------|---------------------|---------------|------------------------------------------------------------|--------------------------------|--------------------------------|----------------------|-------------------------|--------|-----------------|-------------------------|-----------------------------|-----------------------|--------------------------|
| IP100215983.2    | IP100215983.3       | CA1           | carbonic anhydrase I                                       | ADGLAVIGVLMK                   | HDTSLKPISVSYNPATAK             | 1                    | 1                       | 1      | 1               | 0                       | 0                           |                       |                          |
| IP100465436.3    | IP100465436.4       | CAT           | catalase                                                   | AFYVNLVNEEQR                   | LGNPNLHPIVPCPYR                | 1                    | 1                       | 1      | 1               | 0                       | 0                           |                       |                          |
| IP100029260.2    | IP100029260.2       | CD14          | CD14 molecule                                              | AFPALTSLDLSDNPLGGER            | VLSIAQHAHPAFSCQVQR             | 1                    | 1                       | 1      | 1               | 1                       | 1                           | 0.248                 | 0.241                    |
| IP100104074.4    |                     | CD163         | Scavenger receptor cysteine-rich type 1 protein M130       | EAEFGQGTGPIWLVNEVK             |                                | 1                    |                         | 1      | 0               | 0                       | 0                           |                       |                          |
| IP100025204.1    | IP100025204.1       | CD5L          | CD5 molecule-like                                          | ELGCGAASGTPSGILYEPPEAK         | EATLQDCPSGPWGK                 | 1                    | 1                       | 1      | 1               | 0                       | 0                           |                       |                          |
| 40737516         |                     | CDA6predicted | C4A6[Homosapiens]                                          | VGDTLNLNLR                     |                                | 1                    |                         | 1      | 0               | 0                       | 0                           |                       |                          |
|                  | IP100855998.1       | CENPF         | centromere protein F 350/400ka (mitosin)                   |                                | SSGIWENGR                      |                      | 1                       | 0      | 1               | 0                       | 0                           |                       |                          |
| IP100010180.3    | IP100010180.4       | CE51          | carboxylesterase 1 (monocyte/macrophage serine esterase 1) | ESQPLLGTVIDGMLLLK              | ESQPLLGTVIDGMLLLK              | 1                    | 1                       | 1      | 1               | 0                       | 1                           |                       | 0.321                    |
| IP100019591.1    | IP100893864.1       | CFB           | complement factor B                                        | LLQEQGALEYVCPSPGFYPVQTR        | LLQEQGALEYVCPSPGFYPVQTR        | 1                    | 1                       | 1      | 1               | 1                       | 1                           | 0.468                 | 0.589                    |
| IP100019579.1    | IP100165972.3       | CFD           | complement factor D (adipsin)                              | RPDSLQHVLLPLDR                 | RPDSLQHVLLPLDR                 | 1                    | 1                       | 1      | 1               | 0                       | 0                           |                       |                          |
| IP100029739.4    | IP100029739.5       | CFH           | Complement factor H                                        | AVYTCNEGYQLLGEINVR             | CFEGFGIDGPAIAK                 | 1                    | 1                       | 1      | 1               | 1                       | 1                           | 0.285                 | 0.196                    |
| IP100006543.2    | IP100011264.2       | CFHR1         | complement factor H-related 1                              | ITCTEEGWSPPTK                  | YKPF5QVPTGEVFFYSCEYNFVSPSK     | 2                    | 1                       | 1      | 1               | 0                       | 0                           |                       |                          |
| IP100006154.1    | IP100006154.1       | CFHR2         | complement factor H-related 2                              | CLDPCVISQEIEMK                 | ITCAEEGWSPPTK                  | 1                    | 1                       | 1      | 1               | 0                       | 0                           |                       |                          |
| IP100027507.1    | IP100027507.1       | CFHR3         | complement factor H-related 3                              | CYFPYLENGYNQNYGR               | KCYFPYLENGYNQNYGR              | 1                    | 1                       | 1      | 1               | 0                       | 0                           |                       |                          |
| IP100291867.3    | IP100291867.3       | CFI           | complement factor I                                        | TMGYQDFADVVCYTK                | TMGYQDFADVVCYTK                | 1                    | 1                       | 1      | 1               | 1                       | 1                           | 0.463                 | 0.314                    |
| IP100012011.5    |                     | CFL1          | Cofilin-1                                                  | KEDLVFIFWAPESAPLK              |                                | 1                    |                         | 1      | 0               | 0                       | 0                           |                       |                          |
| IP100021364.1    | IP100021364.1       | CFP           | complement factor properdin                                | SISQEIPIGQQSR                  | HCYSIQHCPLK                    | 1                    | 1                       | 1      | 1               | 0                       | 0                           |                       |                          |
| IP100009028.1    | IP100009028.1       | CLEC3B        | C-type lectin domain family 3 member B                     | LDTLAQEVALLK                   | LDTLAQEVALLK                   | 1                    | 1                       | 1      | 1               | 1                       | 1                           | 0.176                 | 0.016                    |
| IP100291262.3    | IP100291262.3       | CLU           | clusterin                                                  | LFSDSPITVTVPEVSR               | EILSVDCASTNPNQSOAK             | 1                    | 1                       | 1      | 1               | 1                       | 1                           | 0.31                  | 0.447                    |
| IP100011283.1    | IP100011283.2       | COL11A2       | collagen type XI alpha 2                                   | GEHGGPPGPGPIGVPQGPAAAGADGEPGAR | GDPGPPGAPGKDGPAGLR             | 3                    | 1                       | 1      | 1               | 0                       | 0                           |                       |                          |
| 179594           | IP100297646.4       | COL1A1        | collagen type I alpha 1                                    | VLCDDVICDETK                   | VLCDDVICDETK                   | 2                    | 1                       | 1      | 1               | 0                       | 0                           |                       |                          |
| IP100168920.2    | IP100168920.3       | COL24A1       | collagen type XXIV alpha 1                                 | NKNRQLQGVQLLPK                 | NKNRQLQGVQLLPK                 | 2                    | 1                       | 1      | 1               | 0                       | 0                           |                       |                          |
| 930045           | IP100021033.2       | COL3A1        | collagen type III alpha 1                                  | GDPGANGLPGAA                   | GPPGINGSPPGK                   | 4                    | 1                       | 1      | 1               | 0                       | 0                           |                       |                          |
| IP100025418.1    | IP100025418.2       | COL7A1        | collagen type VII alpha 1                                  | GDPGVGLPGR                     | IFSPIREAAQASGLNVVML            | 2                    | 1                       | 1      | 1               | 0                       | 0                           |                       |                          |
| 2632189          | IP100423463.1       | COPB1         | coatomer protein complex subunit beta 1                    | VSGDWGQGTLVTVSSASPTSPK         | HNWFDPWGQGTLVTVSSASTK          | 4                    | 1                       | 1      | 1               | 0                       | 0                           |                       |                          |
| IP100017601.1    | IP100017601.1       | CP            | ceruloplasmin (ferroxidase)                                | ALYLYTDETRF                    | HYIAAEIWNYPAGDIFTK             | 1                    | 1                       | 1      | 1               | 1                       | 1                           | 0.8                   | 0.746                    |
| IP100293057.5    |                     | CPB2          | Carboxypeptidase B2                                        | ASASYEQYHSLNEIYSWIEFITER       |                                | 1                    |                         | 1      | 0               | 0                       | 0                           |                       |                          |
| IP100010295.1    | IP100010295.1       | CPN1          | carboxypeptidase N polypeptide 1                           | IVQLIQDTR                      | ELMLQLSEFLCEEFR                | 1                    | 1                       | 1      | 1               | 0                       | 0                           |                       |                          |
| IP100479116.1    | IP100479116.1       | CPN2          | carboxypeptidase N polypeptide 2                           | VVFLNTQLCQFRPDAFGGLPR          | TLNLAQNLLAQPEELFPLTSLQTLK      | 1                    | 1                       | 1      | 1               | 1                       | 1                           | 0.006                 | 0.038                    |
| IP100022389.1    | IP100022389.1       | CRP           | C-reactive protein pentraxin-related                       | RQDNEILIFWSK                   | IAPSFAVESIEDALK                | 1                    | 1                       | 1      | 1               | 0                       | 1                           |                       | 0.038                    |
| IP100032293.1    | IP100032293.1       | CST3          | cystatin C                                                 | LVGGPMDASVEEEGVR               | GYSIFSATK                      | 1                    | 1                       | 1      | 1               | 1                       | 1                           | 0.758                 | 0.642                    |
| IP100005721.1    | IP100005721.1       | DEFA1         | defensin alpha 1                                           | IPACIAGER                      | LVGGPMDASVEEEGVR               | 1                    | 1                       | 1      | 1               | 1                       | 1                           | 0.134                 | 0.068                    |
| IP100465045.2    |                     | DIP2B         | Disco-interacting protein 2 homolog B                      | DSAVQKELR                      | ADEVAAPQIAADIPVEVVS LAWDESLAPK | 1                    | 1                       | 1      | 1               | 0                       | 0                           |                       |                          |
| 4758236          | IP100003351.2       | ECM1          | extracellular matrix protein 1                             | NVALVSGDTENAK                  | NIVWRDPCALCYSPGDEQVNCFNINYL    | 1                    | 1                       | 1      | 1               | 0                       | 0                           |                       |                          |
| IP100019581.1    | IP100019581.1       | F12           | coagulation factor XII (Hageman factor)                    | TTLSGAPCQPWASEATYR             | GRPGQPWCATTNFDQDQR             | 1                    | 1                       | 1      | 1               | 0                       | 0                           |                       |                          |
| IP100019568.1    | IP100019568.1       | F2            | coagulation factor II (thrombin)                           | LAVTTHGLPCLAWASAAQAK           | IVEGSDAEIGMSPWQVMLFR           | 1                    | 1                       | 1      | 1               | 1                       | 1                           | 0.052                 | 0.08                     |
| IP100010290.1    | IP100010290.2       | FABP1         | fatty acid binding protein 1 liver                         | SVTELENGDIINTMTLGDIVFK         | AIGLPEELIQK                    | 1                    | 2                       | 1      | 1               | 0                       | 0                           |                       |                          |
| IP100215746.2    |                     | FABP4         | Fatty acid-binding protein, adipocyte                      | LVSENFDDYMK                    |                                | 1                    |                         | 1      | 0               | 0                       | 0                           |                       |                          |
|                  |                     | FAM135A       | Protein FAM135A                                            |                                |                                |                      |                         | 0      | 0               | 1                       | 1                           | 0.01                  |                          |
| IP100218803.2    | IP100218803.3       | FBLN1         | fibulin 1                                                  | GYQLSDVDGVTCEIDICALPTGGHICSYR  | DIDECESGIHNLCPDFICNTLGSFR      | 1                    | 2                       | 1      | 1               | 0                       | 0                           |                       |                          |
| IP100242956.3    | IP100242956.5       | FCGBP         | Fc fragment of IgG binding protein                         | EQGGQGVCLPNYEATCWLWGD          | APGWDPCLWDECR                  | 1                    | 1                       | 1      | 1               | 1                       | 1                           | 0.491                 | 0.263                    |
| IP100293925.2    |                     | FCN3          | Ficolin-3                                                  | YGDWASGR                       |                                | 1                    |                         | 1      | 0               | 0                       | 0                           |                       |                          |
| IP100021885.1    | IP100021885.1       | FGA           | fibrinogen alpha chain                                     | GLIDEVNDQFTNR                  | ADSGEGDFLAEGGVR                | 1                    | 1                       | 1      | 1               | 1                       | 1                           | 0.823                 | 0.713                    |
| IP100298497.3    | IP100298497.3       | FGB           | fibrinogen beta chain                                      | VYCDMNTENGWWTVIQNR             | DNENVNYSSELEK                  | 1                    | 1                       | 1      | 1               | 1                       | 1                           | 0.687                 | 0.729                    |
| IP100021891.5    | IP100021891.5       | FGG           | fibrinogen gamma chain                                     | YEASILTHDSSIR                  | YEASILTHDSSIR                  | 1                    | 1                       | 1      | 1               | 1                       | 1                           | 0.818                 | 0.694                    |
|                  | IP100289334.1       | FLNB          | filamin B beta                                             |                                | PASFAIR                        |                      | 1                       | 0      | 1               | 0                       | 0                           |                       |                          |
| 51476364         | IP100022418.1       | FN1           | fibronectin 1                                              | SYTITGLQPQTDYK                 | SYTITGLQPQTDYK                 | 1                    | 1                       | 1      | 1               | 1                       | 1                           | 0.587                 | 0.386                    |
|                  | IP100375676.3       | FTL           | ferritin light polypeptide                                 |                                | KLNQALLDLHALGSAR               |                      | 1                       | 0      | 1               | 0                       | 1                           |                       | 0.512                    |
| IP100010375.3    | IP10055812.4        | GC            | Vitamin D-binding protein                                  | LSNLIK                         | FMPAAQLPELPDVELPTNK            | 4                    | 1                       | 1      | 1               | 1                       | 1                           | 0.57                  | 0.376                    |
| IP100026199.1    | IP100026199.2       | GPX3          | glutathione peroxidase 3 (plasma)                          | FLVGPDGIPIMR                   | FLVGPDGIPIMR                   | 1                    | 1                       | 1      | 1               | 0                       | 0                           |                       |                          |
| IP100026314.1    | IP100026314.1       | GSN           | gelsolin (amyloidosis Finnish type)                        | QTVQSVLEPGGETPLFK              | AQPVQVAEGSEPDGFWALGGK          | 1                    | 1                       | 1      | 1               | 1                       | 1                           | 0.69                  | 0.648                    |
| IP100465253.4    | IP100465253.4       | HAUS6         | HAUS augmin-like complex subunit 6                         | LDGTNVAINIPR                   | LDGTNVAINIPR                   | 2                    | 1                       | 1      | 1               | 0                       | 0                           |                       |                          |
| 27574247         | IP100410714.5       | HBA1          | hemoglobin alpha 1                                         | VGAHAGEYGAEALER                | VGAHAGEYGAEALER                | 1                    | 1                       | 1      | 1               | 1                       | 1                           | 0.758                 | 0.913                    |
| 13195586         |                     | HBA2          | Hemoglobin subunit alpha                                   | VGAHAGEYGAEALER                |                                | 1                    |                         | 1      | 0               | 0                       | 0                           |                       |                          |
| IP100658153.1    | IP100654755.3       | HBB           | Hemoglobin subunit beta                                    | SAVTALWQG                      | VLGAFSDGLAHLNLIK               | 2                    | 1                       | 1      | 1               | 1                       | 1                           | 0.887                 | 0.91                     |
| IP100473011.2    | IP100473011.3       | HBD           | hemoglobin delta                                           | VLGAFSDGLAHLNLIK               | VLGAFSDGLAHLNLIK               | 1                    | 1                       | 1      | 1               | 0                       | 0                           |                       |                          |
|                  | IP100220706.10      | HBG1          | hemoglobin gamma A                                         |                                | VNVEDAGGETLGR                  |                      | 1                       | 0      | 1               | 0                       | 1                           |                       | 0.114                    |

| $t_0$ protein ID | $t_{24}$ Protein ID | Gene Symbol  | Annotation                                                                     | $t_0$ Best Sequence               | $t_{24}$ Best Sequence            | Priority score $t_0$ | $t_{24}$ Priority score | AUC $t_0$ ID | AUC $t_{24}$ ID | $t_0$ Spectral Count ID | $t_{24}$ Spectral counts ID | $t_0$ corr. ( $r^2$ ) | $t_{24}$ corr. ( $r^2$ ) |
|------------------|---------------------|--------------|--------------------------------------------------------------------------------|-----------------------------------|-----------------------------------|----------------------|-------------------------|--------------|-----------------|-------------------------|-----------------------------|-----------------------|--------------------------|
| IPI00217473.4    | IPI00217473.5       | HBZ          | hemoglobin zeta                                                                | LRVDPVNFK                         | LRVDPVNFK                         | 1                    | 1                       | 1            | 1               | 0                       | 0                           |                       |                          |
| 229528           |                     | HLA-E        | HLA class I histocompatibility antigen, alpha chain E                          | YACZVTHZGLSSPVTK                  |                                   | 1                    |                         | 1            | 0               | 0                       | 0                           |                       |                          |
| 229271           | IPI00902590.1       | HP           | Haptoglobin                                                                    | TQGDGVYTLNNEK                     | SPVGQVQILNEHTFCAGMSK              | 4                    | 1                       | 1            | 1               | 1                       | 1                           | 0.933                 | 0.93                     |
| IPI00477597.1    | IPI00477597.1       | HPR          | haptoglobin-related protein                                                    | TEGDGVYTLNDK                      | TEGDGVYTLNDK                      | 1                    | 1                       | 1            | 1               | 1                       | 1                           | 0.599                 | 0.04                     |
| IPI00022488.1    | IPI00022488.1       | HPX          | hemopexin                                                                      | LYLVQGTQVYVFLTK                   | LLQDEFPGIPSPDLAAVECHR             | 1                    | 1                       | 1            | 1               | 1                       | 1                           | 0.776                 | 0.77                     |
| IPI00022371.1    | IPI00022371.1       | HRG          | Histidine-rich glycoprotein                                                    | GGEGTGYVDFVSVR                    | GGEGTGYVDFVSVR                    | 1                    | 1                       | 1            | 1               | 1                       | 1                           | 0.847                 | 0.811                    |
|                  | IPI00220362.5       | HSPE1        | heat shock 10kDa protein 1 (chaperonin 10)                                     |                                   | GGEIQPVSVK                        |                      |                         | 1            | 0               | 1                       | 0                           | 0                     | 0                        |
| IPI00009477.4    | IPI00009477.4       | ICAM2        | intercellular adhesion molecule 2                                              | QVILTQLPTLVAVGK                   | VPTPELDSLTLFLFR                   | 2                    | 1                       | 1            | 1               | 1                       | 0                           | 0                     | 0                        |
|                  |                     | IGFALS       | Insulin-like growth factor-binding protein complex acid labile subunit         |                                   |                                   |                      |                         | 0            | 0               | 0                       | 1                           |                       |                          |
| IPI00297284.1    |                     | IGFBP2       | Insulin-like growth factor-binding protein 2                                   | GECWCVNPNTGK                      |                                   | 1                    |                         | 1            | 0               | 0                       | 0                           |                       |                          |
| IPI00305380.3    | IPI00305380.3       | IGFBP4       | insulin-like growth factor binding protein 4                                   | EDARPVQGSQCSSELHR                 | EDARPVQGSQCSSELHR                 | 1                    | 2                       | 1            | 1               | 0                       | 0                           |                       |                          |
| IPI00029235.1    |                     | IGFBP6       | insulin-like growth factor-binding protein 6                                   | HLDSVLQQLQTEVYR                   |                                   | 1                    |                         | 1            | 0               | 0                       | 0                           |                       |                          |
| 34527679         | IPI00386524.3       | IGHA1        | immunoglobulin heavy constant alpha 1                                          | SAVQGGPPDRDLGCGYSVSSVLPGCAEPWNHGK | SAVQGGPPDRDLGCGYSVSSVLPGCAEPWNHGK | 1                    | 1                       | 1            | 1               | 1                       | 1                           | 0.815                 | 0.189                    |
|                  |                     | IGHD         | Ig delta chain C region                                                        |                                   |                                   |                      |                         | 0            | 0               | 1                       | 1                           |                       |                          |
| 21757089         |                     | IGHG1        | Ig gamma-1 chain C region                                                      | WQQGNVFCSCVMHEALHDHYTQK           |                                   | 1                    |                         | 1            | 0               | 1                       | 1                           | 0.024                 |                          |
|                  |                     | IGHG2        | Ig gamma-2 chain C region                                                      |                                   |                                   |                      |                         | 0            | 0               | 1                       | 1                           |                       |                          |
|                  |                     | IGHG3        | Ig gamma-3 chain C region                                                      |                                   |                                   |                      |                         | 0            | 0               | 1                       | 1                           |                       |                          |
|                  |                     | IGHG4        | Ig gamma-4 chain C region                                                      |                                   |                                   |                      |                         | 0            | 0               | 1                       | 1                           |                       |                          |
|                  |                     | IGHM         | Ig mu chain C region                                                           |                                   |                                   |                      |                         | 0            | 0               | 1                       | 1                           | 0.077                 |                          |
|                  |                     | IGJ          | immunoglobulin J chain                                                         |                                   |                                   |                      |                         | 0            | 0               | 1                       | 1                           |                       |                          |
|                  |                     | IGKC         | Ig kappa chain C region                                                        |                                   |                                   |                      |                         | 0            | 0               | 1                       | 1                           |                       |                          |
|                  |                     | IGKV1-5      | Ig kappa chain V-1 region HK102 (Fragment)                                     |                                   |                                   |                      |                         | 0            | 0               | 0                       | 1                           |                       |                          |
|                  |                     | IGLC7        | Ig lambda-7 chain C region                                                     |                                   |                                   |                      |                         | 0            | 0               | 1                       | 1                           |                       |                          |
| 1871489          |                     | IGM          | IgM[Homo sapiens]                                                              | EVQLVESGGGLVKPRG                  |                                   | 1                    |                         | 1            | 0               | 0                       | 0                           |                       |                          |
| 33319112         |                     | IGVH3        | Ig heavy chain variable region, VH3 family                                     | LSCVTSGFDDHGMWTWR                 |                                   | 1                    |                         | 1            | 0               | 0                       | 0                           |                       |                          |
| IPI00292530.1    | IPI00292530.1       | ITI1         | inter-alpha (globulin) inhibitor H1                                            | LWAYLTIQELLAK                     | LWAYLTIQELLAK                     | 1                    | 1                       | 1            | 1               | 1                       | 1                           | 0.776                 | 0.7                      |
| IPI00305461.2    | IPI00305461.3       | ITI2         | inter-alpha (globulin) inhibitor H2                                            | MLADAPPQDPSCCSGALYYSK             | AHVYFKPTVAQQR                     | 1                    | 1                       | 1            | 1               | 1                       | 1                           | 0.79                  | 0.551                    |
| IPI00028413.7    | IPI00028413.8       | ITI3         | inter-alpha (globulin) inhibitor H3                                            | LVDEDMNSFK                        | LWAYLTIEQLEK                      | 1                    | 1                       | 1            | 1               | 1                       | 1                           | 0.327                 | 0.132                    |
|                  |                     |              | inter-alpha (globulin) inhibitor H4 (plasma Kallikrein-sensitive glycoprotein) | LDYQEGPPGVEISCVSVEL               | SPEQQETVLGDLNLIIR                 | 1                    | 1                       | 1            | 1               | 1                       | 1                           | 0.666                 | 0.7                      |
| IPI00218192.1    | IPI00218192.3       | ITI4         |                                                                                | LDYQEGPPGVEISCVSVEL               |                                   | 1                    | 1                       | 1            | 1               | 1                       | 1                           | 0.666                 | 0.7                      |
| 1575607          | IPI00479786.5       | KHSRP        | KH-type splicing regulatory protein                                            | AQPPGGGGPGIR                      | AGLVIGK                           | 2                    | 1                       | 1            | 1               | 0                       | 0                           |                       |                          |
|                  | IPI00827544.1       | KIF19        | kinesin family member 19                                                       |                                   | QIIDDYNL                          |                      | 1                       | 0            | 1               | 0                       | 0                           |                       |                          |
| IPI00654888.2    | IPI00654888.4       | KLKB1        | kallikrein B plasma (Fletcher factor) 1                                        | CLLFSFLPASSINDMEK                 | CLLFSFLPASSINDMEK                 | 1                    | 1                       | 1            | 1               | 0                       | 0                           |                       |                          |
| IPI00032328.1    | IPI00215894.1       | KNG1         | kininogen 1                                                                    | LGQSLDCNAEYVVPWEK                 | LGQSLDCNAEYVVPWEK                 | 1                    | 1                       | 1            | 1               | 1                       | 1                           | 0.342                 | 0.542                    |
|                  |                     | KRT31        | Keratin, type I cuticular Ha1                                                  |                                   |                                   |                      |                         | 0            | 0               | 0                       | 1                           |                       |                          |
|                  |                     | KRT81        | Keratin, type II cuticular Hb1                                                 |                                   |                                   |                      |                         | 0            | 0               | 0                       | 1                           |                       |                          |
| 31652249         | IPI00032311.4       | LBP          | lipopolysaccharide binding protein                                             | GLQYAAQEGLLALQSELLR               | GLQYAAQEGLLALQSELLR               | 1                    | 1                       | 1            | 1               | 1                       | 1                           | 0.801                 | 0.763                    |
| IPI00299547.4    | IPI00299547.4       | LCN2         | lipocalin 2                                                                    | VPLQNFQDNQFQSK                    | SLGLPENHIVFPVPIQDCIDG             | 1                    | 1                       | 1            | 1               | 0                       | 0                           |                       |                          |
| IPI00010471.4    | IPI00010471.5       | LCP1         | lymphocyte cytosolic protein 1 (L-plastin)                                     | VDTDGGNGYISFNLNDFK                | LNLAFIANLFNR                      | 1                    | 1                       | 1            | 1               | 0                       | 0                           |                       |                          |
| IPI00023673.1    | IPI00023673.1       | LGALS3BP     | lectin galactoside-binding soluble 3 binding protein                           | ELSEALGQIFDSQR                    | GQGWGTVCNLDLWDLTASVVCR            | 1                    | 2                       | 1            | 1               | 0                       | 0                           |                       |                          |
| IPI00164623.4    |                     | LOC100133511 | hypothetical protein LOC100133511                                              | DICEEQVNSLPGSITK                  |                                   | 1                    |                         | 1            | 0               | 0                       | 0                           |                       |                          |
| IPI00167093.4    |                     | LOC100293069 | similar to complement factor H-related 1                                       | EIMENYNIARL                       |                                   | 1                    |                         | 1            | 0               | 0                       | 0                           |                       |                          |
| IPI00061977.1    |                     | LOC100294459 | similar to immunoglobulin lambda-like polypeptide 1                            | GDTFCMVGHEALPLAFTQE               |                                   | 1                    |                         | 1            | 0               | 0                       | 0                           |                       |                          |
| IPI00736860.2    |                     | LOC100294460 | similar to immunoglobulin lambda-like polypeptide 2                            | NQVTLTLVK                         |                                   | 1                    |                         | 1            | 0               | 0                       | 0                           |                       |                          |
| IPI00029168.1    | IPI00029168.1       | LPA          | lipoprotein Lp(a)                                                              | TPEYYPNAGLIMNYCR                  | TPEYYPNAGLIMNYCR                  | 1                    | 1                       | 1            | 1               | 1                       | 1                           | 0.56                  | 0.06                     |
| 21707947         | IPI00022417.4       | LRG1         | leucine-rich alpha-2-glycoprotein 1                                            | ENQLELVESWLHGLK                   | ENQLELVESWLHGLK                   | 1                    | 1                       | 1            | 1               | 1                       | 1                           | 0.646                 | 0.404                    |
| IPI00298860.5    |                     | LTF          | Lactotransferrin                                                               | CSTSPLEACEFLR                     |                                   | 1                    |                         | 1            | 0               | 0                       | 0                           |                       |                          |
| IPI00020986.2    | IPI00020986.2       | LUM          | lumican                                                                        | SLEYLDLSFNQIAR                    | LPSGLPVSLLTLYLDNNK                | 1                    | 1                       | 1            | 1               | 1                       | 1                           | 0.829                 | 0.61                     |
| 3402141          | IPI00019038.1       | LYZ          | lysozyme (renal amyloidosis)                                                   | WESGYNTR                          | TPGAVNACHLSCSALLQDNIADAVACA       | 1                    | 1                       | 1            | 1               | 0                       | 0                           |                       |                          |
|                  | 126608              | LYZL4        | lysozyme-like 4                                                                |                                   | GYSLGNWVCAAK                      |                      |                         | 1            | 0               | 1                       | 0                           |                       |                          |
|                  |                     | MACF1        | Microtubule-actin cross-linking factor 1, isoform 4                            |                                   |                                   |                      |                         | 0            | 0               | 1                       | 1                           |                       | 0.004                    |
| IPI00217493.4    | IPI00217493.5       | MB           | myoglobin                                                                      | HGATVLTALGGILK                    | HGATVLTALGGILK                    | 2                    | 1                       | 1            | 1               | 0                       | 1                           |                       | 0.295                    |
| IPI00004373.1    | IPI00004373.1       | MBL2         | mannose-binding lectin (protein C) 2 soluble (opsonic defect)                  | TEGQFVTLTGNR                      | FQASVATPR                         | 1                    | 2                       | 1            | 1               | 0                       | 0                           |                       |                          |
| 21756643         |                     | MCAM         | Cell surface glycoprotein MUC18                                                | LSCEASGFR                         |                                   | 1                    |                         | 1            | 0               | 0                       | 0                           |                       |                          |
| IPI00306929.7    | IPI00306929.9       | MYO18B       | myosin XVIIIIB                                                                 | TTELKEAEPQGK                      | TTELKEAEPQGK                      | 2                    | 1                       | 1            | 1               | 0                       | 0                           |                       |                          |

| $t_0$ protein ID | $t_{24}$ Protein ID | Gene Symbol | Annotation                                                                                          | $t_0$ Best Sequence       | $t_{24}$ Best Sequence        | Priority score $t_0$ | $t_{24}$ Priority score | AUC ID | AUC $t_{24}$ ID | $t_0$ Spectral Count ID | $t_{24}$ Spectral counts ID | $t_0$ corr. ( $r^2$ ) | $t_{24}$ corr. ( $r^2$ ) |
|------------------|---------------------|-------------|-----------------------------------------------------------------------------------------------------|---------------------------|-------------------------------|----------------------|-------------------------|--------|-----------------|-------------------------|-----------------------------|-----------------------|--------------------------|
| IPI00022429.3    | IPI00022429.3       | NID1        | nidogen 1                                                                                           |                           | DLGCYSVPSVLPGCAEPWNHGK        | 1                    | 1                       | 0      | 1               | 0                       | 0                           |                       |                          |
| IPI00020091.1    | IPI00020091.1       | ORM1        | orosomucoid 1                                                                                       | NWGLSVYADKPETTK           | NWGLSVYADKPETTK               | 1                    | 1                       | 1      | 1               | 1                       | 1                           | 0.904                 | 0.784                    |
| IPI0002295.1     | IPI0002295.1        | ORM2        | orosomucoid 2                                                                                       | TLMFGSYLDEEK              | NWGLSVYADKPETTK               | 1                    | 1                       | 1      | 1               | 1                       | 1                           | 0.814                 | 0.672                    |
| IPI00216691.4    | IPI00216691.4       | PF4V1       | Platelet factor 4 variant                                                                           | HITSLEVIK                 |                               | 1                    |                         | 1      | 0               | 0                       | 0                           |                       |                          |
| IPI00163207.1    | IPI00163207.1       | PFN1        | Profilin-1                                                                                          | TFVNITPAEYGVLVGK          |                               | 1                    |                         | 1      | 0               | 0                       | 0                           |                       |                          |
| IPI0004573.1     | IPI0004573.2        | PGLYRP2     | peptidoglycan recognition protein 2                                                                 | SLPLLMDSVIQALAELEQK       | SLPLLMDSVIQALAELEQK           | 1                    | 1                       | 1      | 1               | 1                       | 1                           | 0.487                 | 0.247                    |
| IPI00306311.8    | IPI00306311.8       | PIGR        | polymeric immunoglobulin receptor                                                                   | NADLQVLKPEPELVYEDLR       | NADLQVLKPEPELVYEDLR           | 2                    | 1                       | 1      | 1               | 0                       | 0                           |                       |                          |
| 229453           | IPI00019580.1       | PLEK        | pleckstrin                                                                                          | LPETIDLGALYLSMK           | KSEENLFEIITADEVHYFLQAATPK     | 1                    | 1                       | 1      | 1               | 0                       | 0                           |                       |                          |
| 1262347          | IPI00019580.1       | PLG         | Plasminogen                                                                                         | EPLDDYVNTQGASLFSVTK       | VILGAHQEVNLEPHVQIEVSR         | 1                    | 1                       | 1      | 1               | 1                       | 1                           | 0.232                 | 0.296                    |
| IPI00555900.1    | IPI00218732.3       | PON1        | paraoxonase 1                                                                                       | ILLMDLNEDPTVLELGITGSK     | IFYDSENPAPSEVLR               | 1                    | 1                       | 1      | 1               | 0                       | 0                           |                       |                          |
|                  |                     | POTEK       | POTE ankyrin domain family, member K                                                                | SYELPDGQVITIGNER          |                               | 1                    |                         | 1      | 0               | 0                       | 0                           |                       |                          |
| IPI00022445.1    | IPI00022445.1       | PPBP        | pro-platelet basic protein (chemokine (C-X-C motif) ligand 7)                                       | GTHCNQVEVIATLK            | GKEESLDSLDYALER               | 1                    | 1                       | 1      | 1               | 1                       | 1                           | 0.414                 | 0.306                    |
| IPI00027350.2    | IPI00027350.3       | PRDX2       | peroxiredoxin 2                                                                                     | KEGGLGPLNIPLADVTR         | ATAVVDGAFK                    | 1                    | 1                       | 1      | 1               | 0                       | 0                           |                       |                          |
| IPI00024825.2    | IPI00024825.2       | PRG4        | proteoglycan 4                                                                                      | ITEVWGIPIPIDTVFTR         | GLPNVVTSAISLPNIR              | 1                    | 1                       | 1      | 1               | 1                       | 1                           | 0.036                 | 0.016                    |
| IPI00294004.1    | IPI00013179.1       | PROS1       | Vitamin K-dependent protein 5                                                                       | HCLVTVEK                  |                               | 1                    |                         | 1      | 0               | 0                       | 0                           |                       |                          |
| IPI00013179.1    | IPI00013179.1       | PTGDS       | Prostaglandin-H2 D-isomerase                                                                        | TMLLQAPAGSLGSYSYR         | APEAQVSVQPNFQDKK              | 1                    | 1                       | 1      | 1               | 1                       | 1                           | 0.609                 | 0.018                    |
| IPI00025426.1    | IPI00025426.2       | PZP         | pregnancy-zone protein                                                                              | AFQPFVELTMPYSVIR          | GSFALSFPVESDVAPIAR            | 1                    | 1                       | 1      | 1               | 1                       | 1                           | 0                     | 0.005                    |
| IPI00003590.2    | IPI00003590.2       | QSOX1       | Sulfhydryl oxidase 1                                                                                | LDVPVWDVEATLNFVK          |                               | 1                    |                         | 1      | 0               | 0                       | 0                           |                       |                          |
| IPI00221325.3    | IPI00221325.3       | RANBP2      | RAN binding protein 2                                                                               | ERGINVKILR                | DTSFLGSDDIGNIDVR              | 3                    | 1                       | 1      | 1               | 0                       | 0                           |                       |                          |
| IPI00411314.2    | IPI00304692.1       | RBMX        | RNA binding motif protein X-linked                                                                  | LTVIMVIP                  | RDVLSR                        | 4                    | 1                       | 1      | 1               | 0                       | 0                           |                       |                          |
| 2895204          | IPI00022420.3       | RBP4        | retinol binding protein 4 plasma                                                                    | FSGTWYAMAK                | LLNWDVDCADMVGTFTDTEPAK        | 2                    | 1                       | 1      | 1               | 1                       | 1                           | 0.448                 | 0.529                    |
| IPI00009027.1    | IPI00009027.1       | REG1A       | regenerating islet-derived 1 alpha                                                                  | ISCPGNTAYR                | RWHWSSGSLVSYK                 | 2                    | 1                       | 1      | 1               | 0                       | 0                           |                       |                          |
| IPI00014048.1    | IPI00014048.1       | RNASE1      | ribonuclease RNase A family 1 (pancreatic)                                                          | QHMDSDSSSSSTYCNQMMR       | CKPVNFTVHEPLVDVQVNCVQEK       | 1                    | 2                       | 1      | 1               | 0                       | 0                           |                       |                          |
| IPI00007047.1    | IPI00007047.1       | S100A8      | S100 calcium binding protein A8                                                                     | LLETECPQYR                | ALNSIDVYHK                    | 1                    | 1                       | 1      | 1               | 0                       | 0                           |                       |                          |
| IPI00027462.1    | IPI00027462.1       | S100A9      | S100 calcium binding protein A9                                                                     | VIEHIMEDLDTNADK           | VIEHIMEDLDTNADK               | 1                    | 1                       | 1      | 1               | 1                       | 1                           | 0.813                 | 0.565                    |
| 247142           | IPI00006146.4       | SAA1        | Serum amyloid A protein                                                                             | SFFSFLGEAFDGAR            | GPGGAAVAEVSINAR               | 1                    | 1                       | 1      | 1               | 1                       | 1                           | 0.879                 | 0.859                    |
| IPI00027191.1    | IPI00027191.1       | SAA3P       | serum amyloid A3 pseudogene                                                                         | SGKDPNHRFPAGLPEK          | SGKDPNHRFPAGLPEK              | 1                    | 1                       | 1      | 1               | 0                       | 0                           |                       |                          |
| IPI00019399.1    | IPI00019399.1       | SAA4        | serum amyloid A4 constitutive                                                                       | VYLQGLIDYFLFGNSSTVLEDSK   | VYLQGLIDYFLFGNSSTVLEDSK       | 1                    | 1                       | 1      | 1               | 1                       | 1                           | 0.494                 | 0.498                    |
| IPI00297325.3    | IPI00297325.3       | SDHD        | Succinate dehydrogenase [ubiquinone] cytochrome b small subunit, mitochondrial                      | AVAMLWK                   |                               | 2                    |                         | 1      | 0               | 0                       | 0                           |                       |                          |
|                  | IPI00218795.1       | SELL        | selectin L                                                                                          |                           | NKEDCVEIYK                    |                      |                         | 1      | 0               | 1                       | 0                           |                       |                          |
| IPI00029061.2    | IPI00029061.3       | SEPP1       | selenoprotein P plasma 1                                                                            | LVYHLGLPFSFLTFFPYVEEAIK   | LVYHLGLPFSFLTFFPYVEEAIK       | 2                    | 1                       | 1      | 1               | 0                       | 0                           |                       |                          |
| 223433           | IPI00553177.1       | SERPINA1    | Alpha-1-antitrypsin                                                                                 | FNKPFVFLMIEQNTK           | VFSNGADLSGVTEAPLK             | 1                    | 1                       | 1      | 1               | 1                       | 1                           | 0.919                 | 0.876                    |
| IPI00007199.4    | IPI00007199.4       | SERPINA10   | serpin peptidase inhibitor clade A (alpha-1 antiproteinase antitrypsin) member 10                   | IFSPFADLSLSATGR           | IFSPFADLSLSATGR               | 1                    | 2                       | 1      | 1               | 0                       | 0                           |                       |                          |
| 225769           | IPI00550991.3       | SERPINA3    | serpin peptidase inhibitor clade A (alpha-1 antiproteinase antitrypsin) member 3                    | RLYGSEAFATDFQDSAAAK       | RLYGSEAFATDFQDSAAAK           | 1                    | 1                       | 1      | 1               | 1                       | 1                           | 0.859                 | 0.892                    |
| IPI00027482.1    | IPI00027482.1       | SERPINA6    | serpin peptidase inhibitor clade A (alpha-1 antiproteinase antitrypsin) member 6                    | NVDFAFSLYK                | WSAGLTSQVDLYIPK               | 1                    | 1                       | 1      | 1               | 0                       | 0                           |                       |                          |
| IPI00292946.1    | IPI00292946.1       | SERPINA7    | serpin peptidase inhibitor clade A (alpha-1 antiproteinase antitrypsin) member 7                    | EGQMESVEAAMSSK            | SFMLLILER                     | 1                    | 1                       | 1      | 1               | 1                       | 1                           | 0.136                 | 0.074                    |
| IPI00032179.2    | IPI00032179.3       | SERPINC1    | serpin peptidase inhibitor clade C (antithrombin) member 1                                          | NDNDNIFLSPSISTAFAMTK      | FATTFYQHLADSK                 | 1                    | 1                       | 1      | 1               | 1                       | 1                           | 0.5                   | 0.541                    |
| 23273330         | IPI00292950.4       | SERPIND1    | serpin peptidase inhibitor clade D (heparin cofactor) member 1                                      | GGETAQSDAPQWEQLNKK        | GGETAQSDAPQWEQLNKK            | 1                    | 1                       | 1      | 1               | 1                       | 1                           | 0.288                 | 0.005                    |
| 39725934         | IPI00006114.4       | SERPINF1    | serpin peptidase inhibitor clade F (alpha-2 antiplasmin pigment epithelium derived factor) member 1 | LDLQEIINWVQAQMK           | SSMSPPTNVLSPSLVATALSALSLGAEQR | 1                    | 1                       | 1      | 1               | 1                       | 1                           | 0.627                 | 0.362                    |
| IPI00029863.4    | IPI00879231.1       | SERPINF2    | serpin peptidase inhibitor clade F (alpha-2 antiplasmin pigment epithelium derived factor) member 2 | LGNQEPGGQTALK             | LCQDLGPGAFR                   | 1                    | 1                       | 1      | 1               | 1                       | 1                           | 0.037                 | 0.169                    |
| 179621           | IPI00291866.5       | SERPING1    | serpin peptidase inhibitor clade G (C1 inhibitor) member 1                                          | GVTSVSIQHFSPDLAIR         | LVLLNAILYSAK                  | 1                    | 1                       | 1      | 1               | 1                       | 1                           | 0.75                  | 0.655                    |
| IPI00023019.1    | IPI00179016.8       | SETD1A      | SET domain containing 1A                                                                            |                           | FQGSAAETAESRR                 |                      |                         | 1      | 0               | 1                       | 0                           |                       |                          |
|                  | IPI00023019.1       | SHBG        | sex hormone-binding globulin                                                                        | VVLSSGSGPGLDPLVLGLPLQLK   | ALALPPLGLAPLNLWAKPQGR         | 1                    | 2                       | 1      | 1               | 0                       | 0                           |                       |                          |
|                  | IPI00011961.1       | SIGLEC1     | sialic acid binding Ig-like lectin 1 sialoadhesin                                                   |                           | GCSPR                         |                      |                         | 1      | 0               | 1                       | 0                           |                       |                          |
| IPI00020687.1    | IPI00020687.1       | SPINK1      | serine peptidase inhibitor Kazal type 1                                                             | IYDPCVCGTDGNTYPNECVLCFENR | IYDPCVCGTDGNTYPNECVLCFENR     | 1                    | 2                       | 1      | 1               | 0                       | 0                           |                       |                          |
| IPI00550363.2    | IPI00550363.3       | TAGLN2      | transgelin 2                                                                                        | YGINTTDIFQTVDLWEGK        | YGINTTDIFQTVDLWEGK            | 1                    | 1                       | 1      | 1               | 0                       | 0                           |                       |                          |
| 2815575          | IPI00022463.1       | TF          | Serotransferrin                                                                                     | KSVEEYANCHLAR             | TAGWNIPMGLLYNK                | 1                    | 1                       | 1      | 1               | 1                       | 1                           | 0.478                 | 0.885                    |
| IPI00032292.1    | IPI00032292.1       | TIMP1       | TIMP metalloproteinase inhibitor 1                                                                  | LOSGTHCLWTDQLLQSGSEK      | LOSGTHCLWTDQLLQSGSEK          | 1                    | 1                       | 1      | 1               | 0                       | 0                           |                       |                          |

| $t_0$ protein ID | $t_{24}$ Protein ID | Gene Symbol  | Annotation                                                                                   | $t_0$ Best Sequence       | $t_{24}$ Best Sequence        | Priority score $t_0$ | $t_{24}$ Priority score | AUC $t_0$ ID | AUC $t_{24}$ ID | $t_0$ Spectral Count ID | $t_{24}$ Spectral counts ID | $t_0$ corr. ( $r^2$ ) | $t_{24}$ corr. ( $r^2$ ) |
|------------------|---------------------|--------------|----------------------------------------------------------------------------------------------|---------------------------|-------------------------------|----------------------|-------------------------|--------------|-----------------|-------------------------|-----------------------------|-----------------------|--------------------------|
| IPI0029894.5     | IPI0029894.6        | TLN1         | talin 1                                                                                      | GVAALTSDPVAQIVLDTASDVLDK  | GTEWVDPEDPTVIAENELGAAAAIEAAAK | 1                    | 2                       | 1            | 1               | 1                       | 1                           | 0.253                 | 0.125                    |
| IPI00180240.2    |                     | TMSL3        | Thymosin beta-4-like protein 3                                                               | NPLPSKETIEQEK             |                               | 1                    |                         | 1            | 0               | 0                       | 0                           |                       |                          |
|                  | IPI00554760.1       | TNR          | tenascin R (restrictin janusin)                                                              |                           | QQSLESTVDAFTGIDPPK            |                      | 1                       | 0            | 1               | 0                       | 0                           |                       |                          |
| IPI00010779.3    |                     | TPM4         | Tropomyosin alpha-4 chain                                                                    | AEGDVAALNR                |                               | 1                    |                         | 1            | 0               | 0                       | 0                           |                       |                          |
|                  |                     | TRANK1       | TPR and ankyrin repeat-containing protein 1                                                  |                           |                               |                      |                         | 0            | 0               | 1                       | 1                           | 0                     |                          |
|                  | IPI00413160.4       | TRIOBP       | TRIO and F-actin binding protein                                                             |                           | SPVGGDAAGQKK                  |                      |                         | 1            | 0               | 1                       | 0                           |                       |                          |
| IPI00023283.3    | IPI00023283.3       | TTN          | titin                                                                                        | SEPIVAR                   | VLACNAGGPGPEAEVPGTVK          | 1                    | 1                       | 1            | 1               | 0                       | 0                           |                       |                          |
| 230651           | IPI00022432.1       | TTR          | transthyretin                                                                                | KAADDTWEPFASGK            | KAADDTWEPFASGK                | 1                    | 1                       | 1            | 1               | 1                       | 1                           | 0.896                 | 0.928                    |
| IPI00295413.8    | IPI00807602.1       | ULK4         | unc-51-like kinase 4 (C. elegans)                                                            | TEHNPTFTR                 | ILCEDPLPPIPKDSSRPK            | 4                    | 1                       | 1            | 1               | 0                       | 0                           |                       |                          |
| 33358191         | IPI00386524.3       | unknown 51   | LChainL,CrystalStructureOFFab'FromTheHiv-1NeutralizingAntibody2f5InComplexWithItsGp41Epitope | ALQLTQSPSLSASVGDR         |                               | 1                    |                         | 1            | 0               | 0                       | 0                           |                       |                          |
| 51103537         |                     | unknown 70   | immunoglobulin variable region VL kappa domain                                               | DVVMTQSPSLSLAVTPGEPASISCR |                               | 1                    |                         | 1            | 0               | 0                       | 0                           |                       |                          |
| 51103559         |                     | unknown 72   | immunoglobulin variable region VL kappa domain                                               | DIVMTQSPSLSLAVTPGEPASISCR |                               | 1                    |                         | 1            | 0               | 0                       | 0                           |                       |                          |
| 896277           |                     | unknown 8    | immunoglobulin lambda light chain VLJ region                                                 | SYELTQPPSVSVPKGTAR        |                               | 1                    |                         | 1            | 0               | 0                       | 0                           |                       |                          |
|                  | IPI00887739.3       | unknown a111 | similar to complement component C3, partial                                                  |                           | SNLDEHIAEENIVSR               |                      |                         | 1            | 0               | 1                       | 0                           |                       |                          |
|                  | IPI00894523.1       | unknown a126 | POTE ankyrin domain family, member                                                           |                           | AGFAGDDAPR                    |                      |                         | 1            | 0               | 1                       | 0                           |                       |                          |
|                  | IPI00930382.1       | unknown a149 | hp2-alpha                                                                                    |                           | SPVGVQPIILNEHTF               |                      |                         | 1            | 0               | 1                       | 0                           |                       |                          |
|                  | IPI00736860.3       | unknown a60  | immunoglobulin heavy chain                                                                   |                           | DYFPEPVTVSWNSGALTR            |                      |                         | 1            | 0               | 1                       | 0                           |                       |                          |
|                  |                     | unknownnd1   | Ig kappa chain V-I region AG                                                                 |                           |                               |                      |                         | 0            | 0               | 1                       | 0                           |                       |                          |
|                  |                     | unknownnd10  | Ig kappa chain V-III region SIE                                                              |                           |                               |                      |                         | 0            | 0               | 1                       | 1                           |                       |                          |
|                  |                     | unknownnd11  | Ig kappa chain V-III region VG (Fragment)                                                    |                           |                               |                      |                         | 0            | 0               | 1                       | 1                           |                       |                          |
|                  |                     | unknownnd12  | Ig kappa chain V-III region VH (Fragment)                                                    |                           |                               |                      |                         | 0            | 0               | 0                       | 1                           |                       |                          |
|                  |                     | unknownnd13  | Ig kappa chain V-IV region Len                                                               |                           |                               |                      |                         | 0            | 0               | 1                       | 1                           |                       |                          |
|                  |                     | unknownnd14  | Ig lambda chain V-I region WAH                                                               |                           |                               |                      |                         | 0            | 0               | 0                       | 1                           |                       |                          |
|                  |                     | unknownnd15  | Ig lambda chain V-III region LOI                                                             |                           |                               |                      |                         | 0            | 0               | 1                       | 1                           |                       |                          |
|                  |                     | unknownnd16  | JPH1HUMAN-R                                                                                  |                           |                               |                      |                         | 0            | 0               | 0                       | 1                           |                       |                          |
|                  |                     | unknownnd17  | Keratin-81-like protein                                                                      |                           |                               |                      |                         | 0            | 0               | 0                       | 1                           |                       |                          |
|                  |                     | unknownnd2   | Ig kappa chain V-II region MIL                                                               |                           |                               |                      |                         | 0            | 0               | 1                       | 0                           |                       |                          |
|                  |                     | unknownnd3   | ZXDBHUMAN-R                                                                                  |                           |                               |                      |                         | 0            | 0               | 1                       | 0                           |                       |                          |
|                  |                     | unknownnd4   | FBX7HUMAN-R                                                                                  |                           |                               |                      |                         | 0            | 0               | 0                       | 1                           |                       |                          |
|                  |                     | unknownnd5   | Ig heavy chain V-III region GAL                                                              |                           |                               |                      |                         | 0            | 0               | 1                       | 1                           |                       |                          |
|                  |                     | unknownnd6   | Ig kappa chain V-I region EU                                                                 |                           |                               |                      |                         | 0            | 0               | 1                       | 1                           |                       |                          |
|                  |                     | unknownnd7   | Ig kappa chain V-I region WEA                                                                |                           |                               |                      |                         | 0            | 0               | 0                       | 1                           |                       |                          |
|                  |                     | unknownnd8   | Ig kappa chain V-III region B6                                                               |                           |                               |                      |                         | 0            | 0               | 0                       | 1                           |                       |                          |
|                  |                     | unknownnd9   | Ig kappa chain V-III region NG9 (Fragment)                                                   |                           |                               |                      |                         | 0            | 0               | 0                       | 1                           |                       |                          |
|                  | IPI00020037.1       | USF2         | upstream transcription factor 2 c-fos interacting                                            |                           | MLDPGLDPAASATAAAAAASHDK       |                      |                         | 1            | 0               | 1                       | 0                           |                       |                          |
| IPI00395488.2    | IPI00395488.2       | VASN         | vasorin                                                                                      | LAGLGLQLDGLFSR            | LLLLDLSHNSLLALEPGILDANVEALR   | 1                    | 2                       | 1            | 1               | 1                       | 1                           | 0.045                 | 0.036                    |
| IPI00027038.1    | IPI00027038.1       | VSIG4        | V-set and immunoglobulin domain containing 4                                                 | VATLSTLLFKPAVIADSGSYFCTAK | VATLSTLLFKPAVIADSGSYFCTAK     | 2                    | 1                       | 1            | 1               | 0                       | 0                           |                       |                          |
| IPI00298971.1    | IPI00298971.1       | VTN          | vitronectin                                                                                  | DVWGIEGPIIDAAFTR          | DVWGIEGPIIDAAFTR              | 1                    | 1                       | 1            | 1               | 1                       | 1                           | 0.4                   | 0.333                    |
| IPI00023014.1    | IPI00023014.1       | VWF          | von Willebrand factor                                                                        | LLDLVFLLDGSSR             | IGWNPAPIIQDFETLPR             | 1                    | 1                       | 1            | 1               | 1                       | 1                           | 0.611                 | 0.477                    |

**Table S9. Average, log-transformed, scaled, plasma protein concentrations.** SIRS+ patients (controls), sepsis survivors and sepsis nonsurvivor at t0 (top cell) and t24 (bottom cell) in 150 discovery patients, showing significant differences from sepsis survivors by weighted ANOVAs (denoted\*, 10% FDR with the exception of t0 sepsis survival versus sepsis nonsurvivor, 5% FDR).

| Gene symbol | Annotation                                      | SIRS+        | sepsis survivors | sepsis nonsurvivor |
|-------------|-------------------------------------------------|--------------|------------------|--------------------|
| A2M         | alpha-2-macroglobulin                           | N/D          | N/D              | N/D                |
|             |                                                 | 14.24 ± 0.09 | 13.95 ± 0.04*    | 14.13 ± 0.06       |
| ACSM6       | Acyl-coenzyme A synthetase ACSM6, mitochondrial | 17.33 ± 0.10 | 17.78 ± 0.06*    | 17.96 ± 0.08       |
|             |                                                 | 13.40 ± 0.08 | 13.79 ± 0.05*    | 13.96 ± 0.09       |
| ACTA2       | actin alpha 2 smooth muscle aorta               | 13.34 ± 0.09 | 13.16 ± 0.03     | 13.39 ± 0.08*      |
|             |                                                 | 12.37 ± 0.05 | 12.25 ± 0.05     | 12.31 ± 0.07       |
| ACTB        | actin beta                                      | 13.42 ± 0.09 | 13.25 ± 0.02     | 13.49 ± 0.08*      |
|             |                                                 | 12.46 ± 0.06 | 12.38 ± 0.04     | 12.46 ± 0.06       |
| ACTBL2      | actin beta-like 2                               | 13.02 ± 0.13 | 12.80 ± 0.04     | 13.05 ± 0.10*      |
|             |                                                 | 12.55 ± 0.11 | 12.52 ± 0.05     | 12.61 ± 0.08       |
| ADIPOQ      | adiponectin C1Q and collagen domain containing  | 13.88 ± 0.05 | 13.69 ± 0.03*    | 13.81 ± 0.06       |
|             |                                                 | 12.26 ± 0.07 | 12.10 ± 0.04     | 12.09 ± 0.08       |
| AFF4        | AF4/FMR2 family member 4                        | N/D          | N/D              | N/D                |
|             |                                                 | 15.10 ± 0.09 | 15.05 ± 0.05     | 15.36 ± 0.09*      |
| AFM         | afamin                                          | 13.94 ± 0.05 | 13.79 ± 0.04     | 13.55 ± 0.06*      |
|             |                                                 | 13.32 ± 0.06 | 13.08 ± 0.05*    | 12.99 ± 0.07       |
| AHSG        | alpha-2-HS-glycoprotein                         | 14.61 ± 0.06 | 14.46 ± 0.05     | 14.01 ± 0.10*      |
|             |                                                 | 14.20 ± 0.07 | 13.85 ± 0.05*    | 13.76 ± 0.10       |
| APOA1       | apolipoprotein A-I                              | 14.39 ± 0.12 | 14.25 ± 0.05     | 13.78 ± 0.06*      |
|             |                                                 | 13.56 ± 0.09 | 13.37 ± 0.05     | 13.06 ± 0.07*      |
| APOA2       | apolipoprotein A-II                             | 13.99 ± 0.16 | 13.91 ± 0.07     | 13.25 ± 0.05*      |
|             |                                                 | 12.58 ± 0.10 | 12.35 ± 0.06     | 12.00 ± 0.05*      |
| APOA4       | apolipoprotein A-IV                             | 14.20 ± 0.09 | 14.05 ± 0.05     | 13.77 ± 0.08*      |
|             |                                                 | 13.40 ± 0.07 | 13.27 ± 0.04     | 13.19 ± 0.07       |
| APOC4       | apolipoprotein C-IV                             | 13.35 ± 0.04 | 13.40 ± 0.04     | 13.23 ± 0.03*      |
|             |                                                 | 12.28 ± 0.08 | 12.37 ± 0.07     | 12.31 ± 0.08       |
| APOH        | apolipoprotein H (beta-2-glycoprotein I)        | 15.03 ± 0.07 | 15.00 ± 0.04     | 14.81 ± 0.07       |
|             |                                                 | 14.32 ± 0.06 | 14.13 ± 0.04*    | 14.06 ± 0.07       |
| APOL1       | apolipoprotein L 1                              | 13.64 ± 0.06 | 13.63 ± 0.03     | 13.32 ± 0.04*      |
|             |                                                 | 12.95 ± 0.07 | 12.82 ± 0.04     | 12.75 ± 0.04       |
| BAI2        | brain-specific angiogenesis inhibitor 2         | 13.26 ± 0.11 | 13.48 ± 0.08     | 13.50 ± 0.12       |
|             |                                                 | 14.50 ± 0.09 | 14.90 ± 0.06*    | 15.00 ± 0.09       |
| C1QA        | complement component 1 q subcomponent A chain   | 14.29 ± 0.07 | 14.35 ± 0.02     | 14.67 ± 0.06*      |
|             |                                                 | 14.06 ± 0.07 | 14.09 ± 0.03     | 14.19 ± 0.05       |
| C1QB        | complement component 1 q subcomponent B chain   | 13.97 ± 0.08 | 13.99 ± 0.02     | 14.31 ± 0.06*      |
|             |                                                 | 14.37 ± 0.08 | 14.40 ± 0.03     | 14.45 ± 0.05       |
| C1QC        | complement component 1 q subcomponent C chain   | 14.33 ± 0.06 | 14.40 ± 0.03     | 14.62 ± 0.07*      |
|             |                                                 | 13.48 ± 0.08 | 13.51 ± 0.03     | 13.67 ± 0.06*      |



| Gene symbol | Annotation                                    | SIRS+        | sepsis survivors | sepsis nonsurvivor |
|-------------|-----------------------------------------------|--------------|------------------|--------------------|
| C1R         | complement component 1 r subcomponent         | 13.54 ± 0.04 | 13.51 ± 0.01     | 13.82 ± 0.07*      |
|             |                                               | 13.11 ± 0.05 | 13.11 ± 0.03     | 13.17 ± 0.03       |
| C1RL        | complement component 1 r subcomponent-like    | 13.61 ± 0.05 | 13.55 ± 0.02     | 13.82 ± 0.05*      |
|             |                                               | 12.49 ± 0.01 | 12.56 ± 0.00     | 12.53 ± 0.01       |
| C2          | complement component 2                        | 17.06 ± 0.12 | 16.80 ± 0.08     | 16.36 ± 0.12*      |
|             |                                               | 14.06 ± 0.05 | 14.09 ± 0.04     | 14.18 ± 0.05       |
| C3          | complement component 3                        | 14.70 ± 0.04 | 14.61 ± 0.02     | 14.80 ± 0.09*      |
|             |                                               | 13.42 ± 0.04 | 13.35 ± 0.02     | 13.29 ± 0.04       |
| C4A         | complement component 4A (Rodgers blood group) | 14.30 ± 0.05 | 14.26 ± 0.03     | 14.60 ± 0.09*      |
|             |                                               | 13.35 ± 0.06 | 13.37 ± 0.04     | 13.33 ± 0.06       |
| C4B         | complement component 4B (Chido blood group)   | 14.36 ± 0.05 | 14.31 ± 0.03     | 14.66 ± 0.09*      |
|             |                                               | 13.38 ± 0.06 | 13.40 ± 0.04     | 13.36 ± 0.06       |
| C4BPA       | complement component 4 binding protein alpha  | 14.88 ± 0.07 | 14.87 ± 0.03     | 14.73 ± 0.08       |
|             |                                               | 14.11 ± 0.05 | 14.03 ± 0.03     | 14.16 ± 0.04*      |
| C4BPB       | complement component 4 binding protein beta   | 14.10 ± 0.04 | 14.07 ± 0.02     | 13.95 ± 0.06       |
|             |                                               | 13.74 ± 0.04 | 13.56 ± 0.04*    | 13.60 ± 0.05       |
| C5          | complement component 5                        | 13.04 ± 0.05 | 12.98 ± 0.01     | 13.45 ± 0.11*      |
|             |                                               | 11.79 ± 0.06 | 11.84 ± 0.04     | 11.74 ± 0.04       |
| C6          | complement component 6                        | 13.74 ± 0.04 | 13.70 ± 0.02     | 13.86 ± 0.07*      |
|             |                                               | 12.93 ± 0.04 | 12.86 ± 0.02     | 12.84 ± 0.03       |
| C7          | complement component 7                        | 13.77 ± 0.09 | 13.61 ± 0.02     | 14.04 ± 0.08*      |
|             |                                               | N/D          | N/D              | N/D                |
| C8A         | complement component 8 alpha polypeptide      | 14.01 ± 0.03 | 14.04 ± 0.02     | 14.12 ± 0.04       |
|             |                                               | 13.46 ± 0.04 | 13.60 ± 0.02*    | 13.55 ± 0.05       |
| C9          | complement component 9                        | 13.49 ± 0.03 | 13.47 ± 0.01     | 13.81 ± 0.09*      |
|             |                                               | 13.06 ± 0.04 | 13.12 ± 0.03     | 13.09 ± 0.03       |
| CENPF       | centromere protein F 350/400ka (mitosin)      | N/D          | N/D              | N/D                |
|             |                                               | 14.59 ± 0.11 | 14.28 ± 0.06*    | 14.06 ± 0.09       |
| CFB         | complement factor B                           | 14.56 ± 0.03 | 14.50 ± 0.02     | 14.64 ± 0.06*      |
|             |                                               | 13.79 ± 0.03 | 13.78 ± 0.02     | 13.70 ± 0.04       |
| CFP         | complement factor properdin                   | 14.72 ± 0.04 | 14.74 ± 0.03     | 14.55 ± 0.06*      |
|             |                                               | 13.02 ± 0.05 | 13.04 ± 0.02     | 13.02 ± 0.04       |
| CLU         | clusterin                                     | 14.45 ± 0.05 | 14.28 ± 0.02*    | 14.35 ± 0.04       |
|             |                                               | 14.17 ± 0.05 | 14.05 ± 0.03*    | 13.92 ± 0.03       |
| COL11A2     | collagen type XI alpha 2                      | 14.23 ± 0.10 | 14.17 ± 0.05     | 13.82 ± 0.07*      |
|             |                                               | 13.50 ± 0.07 | 13.28 ± 0.03*    | 13.25 ± 0.06       |
| COL7A1      | collagen type VII alpha 1                     | 14.92 ± 0.16 | 15.06 ± 0.10     | 15.19 ± 0.14       |
|             |                                               | 13.17 ± 0.05 | 13.37 ± 0.05*    | 13.34 ± 0.04       |
| CP          | ceruloplasmin (ferroxidase)                   | 14.55 ± 0.05 | 14.38 ± 0.03*    | 14.50 ± 0.06       |
|             |                                               | 13.80 ± 0.04 | 13.67 ± 0.03*    | 13.74 ± 0.05       |
| CPN1        | carboxypeptidase N polypeptide 1              | 13.71 ± 0.05 | 13.67 ± 0.02     | 13.83 ± 0.08*      |
|             |                                               | 11.98 ± 0.11 | 12.00 ± 0.04     | 12.03 ± 0.07       |
| CPN2        | carboxypeptidase N polypeptide 2              | 12.65 ± 0.03 | 12.67 ± 0.03     | 12.78 ± 0.06       |
|             |                                               | 13.20 ± 0.04 | 13.34 ± 0.03     | 13.19 ± 0.04*      |

| Gene symbol | Annotation                                                                     | SIRS+        | sepsis survivors | sepsis nonsurvivor |
|-------------|--------------------------------------------------------------------------------|--------------|------------------|--------------------|
| CRP         | C-reactive protein pentraxin-related                                           | 13.45 ± 0.11 | 13.92 ± 0.06*    | 14.51 ± 0.17*      |
|             |                                                                                | 14.09 ± 0.10 | 14.73 ± 0.06*    | 14.58 ± 0.09       |
| CST3        | cystatin C                                                                     | 14.38 ± 0.08 | 14.35 ± 0.04     | 14.64 ± 0.07*      |
|             |                                                                                | 12.87 ± 0.06 | 12.88 ± 0.03     | 13.04 ± 0.05*      |
| DEFA1       | defensin alpha 1                                                               | 13.29 ± 0.16 | 13.34 ± 0.09     | 13.97 ± 0.24*      |
|             |                                                                                | 10.71 ± 0.05 | 10.96 ± 0.05*    | 11.12 ± 0.10       |
| F12         | coagulation factor XII (Hageman factor)                                        | 13.92 ± 0.05 | 13.73 ± 0.03*    | 13.79 ± 0.07       |
|             |                                                                                | 13.91 ± 0.06 | 13.69 ± 0.04*    | 13.76 ± 0.06       |
| F2          | coagulation factor II (thrombin)                                               | 14.13 ± 0.03 | 14.15 ± 0.02     | 14.20 ± 0.03       |
|             |                                                                                | 13.41 ± 0.05 | 13.32 ± 0.02     | 13.40 ± 0.03*      |
| FABP4       | Fatty Acid Binding Protein, 4                                                  | 15.01 ± 0.10 | 14.79 ± 0.05     | 15.24 ± 0.12*      |
| FCGBP       | Fc fragment of IgG binding protein                                             | 13.66 ± 0.04 | 13.60 ± 0.02     | 13.86 ± 0.08*      |
|             |                                                                                | 13.45 ± 0.05 | 13.65 ± 0.03*    | 13.74 ± 0.07       |
| FGB         | fibrinogen beta chain                                                          | 14.46 ± 0.06 | 14.66 ± 0.04     | 14.43 ± 0.07       |
|             |                                                                                | 14.28 ± 0.05 | 14.42 ± 0.02*    | 14.35 ± 0.04       |
| FN1         | fibronectin 1                                                                  | 14.14 ± 0.06 | 13.95 ± 0.04     | 13.74 ± 0.06*      |
|             |                                                                                | 13.47 ± 0.06 | 13.25 ± 0.03*    | 13.40 ± 0.07       |
| GC          | group-specific component (vitamin D binding protein)                           | 15.17 ± 0.07 | 15.15 ± 0.04     | 14.56 ± 0.16*      |
|             |                                                                                | N/D          | N/D              | N/D                |
| GSN         | gelsolin (amyloidosis Finnish type)                                            | 14.07 ± 0.05 | 13.92 ± 0.02*    | 13.99 ± 0.06       |
|             |                                                                                | 12.65 ± 0.05 | 12.63 ± 0.02     | 12.54 ± 0.03       |
| HPX         | hemopexin                                                                      | 14.82 ± 0.07 | 14.88 ± 0.03     | 14.68 ± 0.07*      |
|             |                                                                                | 13.84 ± 0.05 | 13.87 ± 0.03     | 13.76 ± 0.05       |
| HRG         | histidine-rich glycoprotein                                                    | 14.25 ± 0.08 | 14.21 ± 0.05     | 13.77 ± 0.07*      |
|             |                                                                                | 13.43 ± 0.08 | 13.28 ± 0.05     | 12.98 ± 0.07*      |
| IGFBP4      | insulin-like growth factor binding protein 4                                   | 13.70 ± 0.06 | 13.68 ± 0.04     | 13.96 ± 0.07*      |
|             |                                                                                | 12.18 ± 0.09 | 12.05 ± 0.06     | 12.12 ± 0.11       |
| ITIH1       | inter-alpha (globulin) inhibitor H1                                            | 14.03 ± 0.06 | 13.95 ± 0.03     | 13.93 ± 0.07       |
|             |                                                                                | 13.09 ± 0.05 | 13.02 ± 0.03     | 12.89 ± 0.04*      |
| ITIH3       | inter-alpha (globulin) inhibitor H3                                            | 13.79 ± 0.05 | 13.89 ± 0.02     | 14.07 ± 0.06*      |
|             |                                                                                | 12.76 ± 0.03 | 12.86 ± 0.02     | 12.86 ± 0.03       |
| ITIH4       | inter-alpha (globulin) inhibitor H4 (plasma Kallikrein-sensitive glycoprotein) | 14.17 ± 0.04 | 14.16 ± 0.02     | 14.29 ± 0.03*      |
|             |                                                                                | 13.64 ± 0.04 | 13.69 ± 0.02     | 13.74 ± 0.04       |
| KHSRP       | KH-type splicing regulatory protein                                            | 15.28 ± 0.26 | 15.30 ± 0.15     | 15.06 ± 0.26       |
|             |                                                                                | 14.56 ± 0.07 | 14.74 ± 0.04*    | 14.83 ± 0.05       |
| KIF19       | kinesin family member 19                                                       | N/D          | N/D              | N/D                |
|             |                                                                                | 15.57 ± 0.09 | 15.97 ± 0.05*    | 15.87 ± 0.06       |
| KLKB1       | kallikrein B plasma (Fletcher factor) 1                                        | 13.68 ± 0.04 | 13.61 ± 0.02     | 13.49 ± 0.04*      |
|             |                                                                                | N/D          | N/D              | N/D                |
| KNG1        | kininogen 1                                                                    | 14.99 ± 0.03 | 14.89 ± 0.02     | 14.75 ± 0.04*      |
|             |                                                                                | 14.00 ± 0.04 | 13.87 ± 0.03*    | 13.76 ± 0.03*      |
| LBP         | lipopolysaccharide binding protein                                             | 13.99 ± 0.06 | 14.54 ± 0.05*    | 14.46 ± 0.09       |
|             |                                                                                | 13.04 ± 0.06 | 13.46 ± 0.05*    | 13.38 ± 0.08       |

| Gene symbol | Annotation                                                                               | SIRS+        | sepsis survivors | sepsis nonsurvivor |
|-------------|------------------------------------------------------------------------------------------|--------------|------------------|--------------------|
| LCN2        | lipocalin 2                                                                              | 13.51 ± 0.07 | 13.61 ± 0.04     | 13.66 ± 0.08       |
|             |                                                                                          | 11.82 ± 0.07 | 12.01 ± 0.05*    | 12.24 ± 0.09       |
| LCP1        | lymphocyte cytosolic protein 1 (L-plastin)                                               | 12.27 ± 0.05 | 12.25 ± 0.03     | 12.48 ± 0.06*      |
|             |                                                                                          | 12.19 ± 0.04 | 12.31 ± 0.04     | 12.46 ± 0.06       |
| LGALS3BP    | lectin galactoside-binding soluble 3 binding protein                                     | 12.70 ± 0.06 | 12.61 ± 0.02     | 12.88 ± 0.08*      |
|             |                                                                                          | 11.60 ± 0.08 | 11.46 ± 0.03     | 11.61 ± 0.09       |
| LRG1        | leucine-rich alpha-2-glycoprotein 1                                                      | 14.01 ± 0.06 | 14.31 ± 0.03*    | 14.27 ± 0.06       |
|             |                                                                                          | 13.58 ± 0.08 | 13.85 ± 0.04*    | 13.90 ± 0.06       |
| LUM         | lumican                                                                                  | 14.29 ± 0.08 | 13.93 ± 0.04*    | 14.04 ± 0.09       |
|             |                                                                                          | 13.47 ± 0.08 | 13.33 ± 0.04     | 13.46 ± 0.07       |
| LYZL4       | lysozyme-like 4                                                                          | N/D          | N/D              | N/D                |
|             |                                                                                          | 14.01 ± 0.05 | 14.18 ± 0.02*    | 14.24 ± 0.04       |
| MB          | myoglobin                                                                                | 11.63 ± 0.10 | 11.55 ± 0.04     | 11.70 ± 0.09       |
|             |                                                                                          | 12.29 ± 0.06 | 12.35 ± 0.03     | 12.62 ± 0.07*      |
| MBL2        | mannose-binding lectin (protein C) 2 soluble (opsonic defect)                            | 13.19 ± 0.05 | 13.16 ± 0.03     | 13.23 ± 0.06       |
|             |                                                                                          | 13.17 ± 0.11 | 13.11 ± 0.07     | 13.59 ± 0.11*      |
| MYO18B      | myosin XVIII B                                                                           | 12.11 ± 0.05 | 12.27 ± 0.05     | 12.05 ± 0.07       |
|             |                                                                                          | 14.45 ± 0.07 | 14.24 ± 0.05*    | 14.12 ± 0.05       |
| NID1        | nidogen 1                                                                                | N/D          | N/D              | N/D                |
|             |                                                                                          | 14.37 ± 0.06 | 14.25 ± 0.04     | 14.44 ± 0.05*      |
| ORM1        | orosomucoid 1                                                                            | 14.42 ± 0.11 | 14.71 ± 0.06     | 14.88 ± 0.11       |
|             |                                                                                          | 13.63 ± 0.07 | 13.80 ± 0.04     | 14.03 ± 0.06*      |
| PGLYRP2     | peptidoglycan recognition protein 2                                                      | 12.87 ± 0.07 | 12.70 ± 0.03*    | 12.76 ± 0.08       |
|             |                                                                                          | 12.05 ± 0.06 | 11.85 ± 0.04*    | 11.65 ± 0.04*      |
| PIGR        | polymeric immunoglobulin receptor                                                        | N/D          | N/D              | N/D                |
|             |                                                                                          | 12.90 ± 0.10 | 12.74 ± 0.04     | 13.02 ± 0.08*      |
| PLG         | plasminogen                                                                              | 14.36 ± 0.04 | 14.30 ± 0.03     | 14.07 ± 0.04*      |
|             |                                                                                          | 14.02 ± 0.03 | 13.92 ± 0.02*    | 13.79 ± 0.02*      |
| PON1        | paraoxonase 1                                                                            | 13.54 ± 0.05 | 13.52 ± 0.02     | 13.34 ± 0.04*      |
|             |                                                                                          | 12.59 ± 0.05 | 12.46 ± 0.04     | 12.21 ± 0.04*      |
| RBMX        | RNA binding motif protein X-linked                                                       | 15.11 ± 0.18 | 15.07 ± 0.10     | 15.31 ± 0.17       |
|             |                                                                                          | 13.77 ± 0.14 | 13.88 ± 0.08     | 14.29 ± 0.10*      |
| S100A9      | S100 calcium binding protein A9                                                          | 13.22 ± 0.11 | 13.38 ± 0.06     | 13.57 ± 0.10       |
|             |                                                                                          | 12.29 ± 0.07 | 12.53 ± 0.06*    | 12.92 ± 0.12*      |
| SAA1        | serum amyloid A1                                                                         | 13.72 ± 0.07 | 13.64 ± 0.04*    | 13.47 ± 0.04       |
|             |                                                                                          | 12.47 ± 0.11 | 13.27 ± 0.07*    | 12.96 ± 0.12       |
| SAA1 (2)    | serum amyloid A1                                                                         | N/D          | N/D              | N/D                |
|             |                                                                                          | 12.72 ± 0.12 | 13.55 ± 0.08*    | 13.22 ± 0.12       |
| SAA3P       | serum amyloid A3 pseudogene                                                              | 13.38 ± 0.08 | 13.96 ± 0.06*    | 13.92 ± 0.13       |
|             |                                                                                          | 12.91 ± 0.15 | 13.86 ± 0.09*    | 13.58 ± 0.16       |
| SDHD        | Succinate dehydrogenase [ubiquinone] cytochrome b small subunit, mitochondrial precursor | 15.43 ± 0.25 | 15.22 ± 0.13     | 16.11 ± 0.24*      |
|             |                                                                                          | N/D          | N/D              | N/D                |
| SEPP1       | selenoprotein P plasma 1                                                                 | 13.23 ± 0.06 | 12.96 ± 0.04*    | 12.84 ± 0.09       |
|             |                                                                                          | 12.77 ± 0.07 | 12.64 ± 0.04     | 12.70 ± 0.06       |

| Gene symbol | Annotation                                                                                          | SIRS+        | sepsis survivors | sepsis nonsurvivor |
|-------------|-----------------------------------------------------------------------------------------------------|--------------|------------------|--------------------|
| SERPINA1    | serpin peptidase inhibitor clade A (alpha-1 antiproteinase antitrypsin) member 1                    | N/D          | N/D              | N/D                |
|             |                                                                                                     | 13.58 ± 0.07 | 13.87 ± 0.04*    | 14.03 ± 0.05       |
| SERPINA3    | serpin peptidase inhibitor clade A (alpha-1 antiproteinase antitrypsin) member 3                    | 14.25 ± 0.05 | 14.52 ± 0.04*    | 14.63 ± 0.05       |
|             |                                                                                                     | 13.19 ± 0.04 | 13.50 ± 0.04*    | 13.52 ± 0.05       |
| SERPINA7    | serpin peptidase inhibitor clade A (alpha-1 antiproteinase antitrypsin) member 7                    | 13.71 ± 0.05 | 13.54 ± 0.03*    | 13.52 ± 0.05       |
|             |                                                                                                     | 13.83 ± 0.05 | 13.89 ± 0.03     | 13.93 ± 0.04       |
| SERPINC1    | serpin peptidase inhibitor clade C (antithrombin) member 1                                          | 14.71 ± 0.05 | 14.68 ± 0.02     | 14.51 ± 0.04*      |
|             |                                                                                                     | 13.56 ± 0.05 | 13.47 ± 0.02     | 13.41 ± 0.04       |
| SERPINF1    | serpin peptidase inhibitor clade F (alpha-2 antiplasmin pigment epithelium derived factor) member 1 | 13.39 ± 0.05 | 13.31 ± 0.02     | 13.63 ± 0.08*      |
|             |                                                                                                     | 12.06 ± 0.04 | 12.15 ± 0.03     | 12.14 ± 0.05       |
| SERPINF2    | serpin peptidase inhibitor clade F (alpha-2 antiplasmin pigment epithelium derived factor) member 2 | 13.65 ± 0.03 | 13.72 ± 0.02     | 13.62 ± 0.03*      |
|             |                                                                                                     | 12.44 ± 0.04 | 12.49 ± 0.02     | 12.39 ± 0.03*      |
| SERPING1    | serpin peptidase inhibitor clade G (C1 inhibitor) member 1                                          | 14.91 ± 0.06 | 14.84 ± 0.03     | 15.08 ± 0.07*      |
|             |                                                                                                     | 13.79 ± 0.05 | 13.80 ± 0.03     | 13.89 ± 0.05       |
| TF (1)      | transferrin                                                                                         | 14.17 ± 0.06 | 14.01 ± 0.03     | 13.88 ± 0.04*      |
|             |                                                                                                     | 13.95 ± 0.09 | 13.52 ± 0.05*    | 13.39 ± 0.08       |
| TF (2)      | transferrin                                                                                         | 14.62 ± 0.10 | 14.42 ± 0.05     | 14.33 ± 0.10       |
|             |                                                                                                     | 13.93 ± 0.11 | 13.40 ± 0.07*    | 13.29 ± 0.10       |
| TIMP1       | TIMP metallopeptidase inhibitor 1                                                                   | 13.81 ± 0.06 | 13.80 ± 0.03     | 13.92 ± 0.05       |
|             |                                                                                                     | 13.54 ± 0.04 | 13.68 ± 0.03*    | 13.89 ± 0.06*      |
| TRIOBP (1)  | TRIO and F-actin binding protein                                                                    | N/D          | N/D              | N/D                |
|             |                                                                                                     | 13.24 ± 0.08 | 13.39 ± 0.04*    | 13.60 ± 0.06*      |
| TTN         | Titin                                                                                               | 14.39 ± 0.08 | 14.52 ± 0.03     | 14.25 ± 0.07*      |
|             |                                                                                                     | N/D          | N/D              | N/D                |
| TTR         | transthyretin                                                                                       | 14.98 ± 0.12 | 14.90 ± 0.07     | 14.28 ± 0.09*      |
|             |                                                                                                     | 13.83 ± 0.12 | 13.50 ± 0.07*    | 13.12 ± 0.08*      |
| ULK4        | unc-51-like kinase 4 (C. elegans)                                                                   | 15.07 ± 0.11 | 15.16 ± 0.04     | 14.80 ± 0.12*      |
|             |                                                                                                     | N/D          | N/D              | N/D                |
| VSIG4       | V-set and immunoglobulin domain containing 4                                                        | 12.41 ± 0.06 | 12.48 ± 0.03     | 12.53 ± 0.07       |
|             |                                                                                                     | 12.30 ± 0.08 | 12.23 ± 0.05     | 12.49 ± 0.09*      |
| VTN         | Vitronectin                                                                                         | 13.77 ± 0.04 | 13.93 ± 0.03     | 13.75 ± 0.04*      |
|             |                                                                                                     | 13.59 ± 0.06 | 13.76 ± 0.04     | 13.68 ± 0.05       |

**Table S10. Plasma protein-metabolite correlations.** Concordant at t0 and t24 and statistically significant (combined  $-\log_{10}$  p-value  $\geq 6.03$ ). Pairwise Pearson product-moment correlations of 162 log-transformed, annotated plasma proteins and 332 metabolites in 132 subjects at t0 and t24. 18 subjects at t0 were not included within this analysis because there was not a matched value at t24. Excluded were sparse metabolites (detected in  $<50\%$  of patients) and metabolites or proteins that did not have a reported value at both t0 and t24.

| gene symbol | metabolite                    | t0 Pearson Correlation | t0 NegLog10 p-value | t24 Pearson Correlation | t24 NegLog10 p-value | Sum of NegLog10 p-value |
|-------------|-------------------------------|------------------------|---------------------|-------------------------|----------------------|-------------------------|
| B2M         | N6_carbamoylthreonyladenosine | 0.82                   | 37.51               | 0.88                    | 42.43                | 79.94                   |
| AMBP        | X_11334                       | 0.81                   | 35.73               | 0.86                    | 38.08                | 73.81                   |
| B2M         | N2_N2_dimethylguanosine       | 0.82                   | 36.26               | 0.84                    | 35.18                | 71.44                   |
| B2M         | erythronate                   | 0.82                   | 36.92               | 0.82                    | 32.96                | 69.88                   |
| B2M         | X_11334                       | 0.80                   | 33.79               | 0.84                    | 35.87                | 69.66                   |
| B2M         | xylonate                      | 0.82                   | 36.42               | 0.81                    | 31.20                | 67.62                   |
| B2M         | X_04507                       | 0.82                   | 37.46               | 0.80                    | 29.38                | 66.85                   |
| AMBP        | N6_carbamoylthreonyladenosine | 0.81                   | 34.89               | 0.81                    | 31.59                | 66.48                   |
| AMBP        | X_12117                       | 0.80                   | 34.09               | 0.82                    | 32.08                | 66.17                   |
| B2M         | X_12117                       | 0.80                   | 34.44               | 0.80                    | 29.61                | 64.06                   |
| B2M         | arabitol                      | 0.82                   | 37.05               | 0.77                    | 26.19                | 63.24                   |
| B2M         | X_11687                       | 0.78                   | 30.77               | 0.82                    | 32.37                | 63.14                   |
| AMBP        | creatinine                    | 0.81                   | 35.91               | 0.78                    | 27.05                | 62.96                   |
| AMBP        | xylonate                      | 0.82                   | 36.43               | 0.77                    | 26.14                | 62.57                   |
| AMBP        | X_04507                       | 0.81                   | 35.95               | 0.77                    | 26.41                | 62.36                   |
| AMBP        | X_11826                       | 0.75                   | 27.60               | 0.83                    | 34.43                | 62.03                   |
| AMBP        | pyridoxate                    | 0.75                   | 27.65               | 0.83                    | 34.27                | 61.92                   |
| B2M         | four_acetamidobutanoate       | 0.77                   | 30.10               | 0.82                    | 31.68                | 61.78                   |
| B2M         | X_03951                       | 0.78                   | 31.84               | 0.80                    | 29.48                | 61.32                   |
| AMBP        | phenylacetylglutamine         | 0.78                   | 30.87               | 0.80                    | 30.01                | 60.88                   |
| RNASE1      | N6_carbamoylthreonyladenosine | 0.75                   | 27.80               | 0.82                    | 32.57                | 60.37                   |
| B2M         | X_11423                       | 0.77                   | 30.06               | 0.80                    | 30.30                | 60.36                   |
| B2M         | pseudouridine                 | 0.80                   | 34.47               | 0.77                    | 25.82                | 60.30                   |
| AMBP        | X_03951                       | 0.79                   | 32.79               | 0.78                    | 26.78                | 59.58                   |
| RNASE1      | erythronate                   | 0.76                   | 28.94               | 0.80                    | 30.04                | 58.97                   |
| AMBP        | threitol                      | 0.79                   | 32.89               | 0.77                    | 25.95                | 58.84                   |
| AMBP        | erythronate                   | 0.80                   | 33.90               | 0.75                    | 24.50                | 58.40                   |
| B2M         | X_12688                       | 0.74                   | 26.47               | 0.82                    | 31.64                | 58.11                   |
| AMBP        | arabitol                      | 0.81                   | 36.02               | 0.73                    | 22.02                | 58.04                   |
| AMBP        | gulono_1_4_lactone            | 0.76                   | 28.26               | 0.80                    | 29.74                | 58.00                   |
| B2M         | X_10359                       | 0.76                   | 29.18               | 0.79                    | 28.07                | 57.25                   |
| RNASE1      | X_11334                       | 0.74                   | 26.93               | 0.80                    | 30.29                | 57.21                   |
| PTGDS       | X_11334                       | 0.72                   | 24.65               | 0.82                    | 32.46                | 57.11                   |
| AMBP        | N2_N2_dimethylguanosine       | 0.77                   | 30.57               | 0.77                    | 26.22                | 56.79                   |
| AMBP        | X_10359                       | 0.78                   | 31.37               | 0.76                    | 25.42                | 56.79                   |
| B2M         | X_12742                       | 0.74                   | 26.80               | 0.80                    | 29.71                | 56.51                   |
| AMBP        | X_11423                       | 0.78                   | 31.03               | 0.76                    | 24.81                | 55.83                   |
| B2M         | X_12100                       | 0.76                   | 29.18               | 0.77                    | 26.64                | 55.82                   |
| RNASE1      | X_03951                       | 0.75                   | 27.53               | 0.79                    | 28.20                | 55.74                   |
| B2M         | threitol                      | 0.78                   | 30.98               | 0.75                    | 24.53                | 55.51                   |
| RNASE1      | X_11423                       | 0.74                   | 26.28               | 0.80                    | 29.07                | 55.36                   |
| B2M         | X_11429                       | 0.74                   | 27.00               | 0.79                    | 28.15                | 55.15                   |
| AMBP        | three_indoxyl_sulfate         | 0.75                   | 27.92               | 0.78                    | 27.19                | 55.11                   |
| B2M         | erythritol                    | 0.78                   | 31.27               | 0.74                    | 23.11                | 54.37                   |
| AMBP        | X_12405                       | 0.75                   | 28.02               | 0.77                    | 26.19                | 54.21                   |
| RNASE1      | N2_N2_dimethylguanosine       | 0.72                   | 24.67               | 0.80                    | 29.29                | 53.95                   |
| B2M         | one_methylimidazoleacetate    | 0.79                   | 32.40               | 0.72                    | 21.52                | 53.92                   |
| B2M         | phenylacetylglutamine         | 0.74                   | 26.03               | 0.78                    | 27.20                | 53.22                   |
| B2M         | creatinine                    | 0.76                   | 29.02               | 0.75                    | 24.03                | 53.05                   |

| gene symbol | metabolite                    | t0 Pearson Correlation | t0 NegLog10 p-value | t24 Pearson Correlation | t24 NegLog10 p-value | Sum of NegLog10 p-value |
|-------------|-------------------------------|------------------------|---------------------|-------------------------|----------------------|-------------------------|
| B2M         | N_acetylaniline               | 0.77                   | 29.97               | 0.73                    | 22.75                | 52.72                   |
| RNASE1      | X_12117                       | 0.74                   | 26.43               | 0.77                    | 26.07                | 52.51                   |
| RNASE1      | xylonate                      | 0.73                   | 25.59               | 0.77                    | 26.58                | 52.18                   |
| RNASE1      | X_11687                       | 0.70                   | 22.74               | 0.80                    | 29.42                | 52.16                   |
| B2M         | X_12695                       | 0.74                   | 26.31               | 0.76                    | 25.38                | 51.69                   |
| RNASE1      | pseudouridine                 | 0.74                   | 26.95               | 0.76                    | 24.73                | 51.69                   |
| B2M         | allantoin                     | 0.79                   | 31.97               | 0.70                    | 19.64                | 51.61                   |
| AMBP        | X_12742                       | 0.75                   | 27.35               | 0.75                    | 24.20                | 51.55                   |
| RNASE1      | X_12742                       | 0.72                   | 24.42               | 0.78                    | 27.12                | 51.53                   |
| B2M         | X_11826                       | 0.71                   | 23.26               | 0.79                    | 28.23                | 51.49                   |
| PTGDS       | X_12117                       | 0.76                   | 28.39               | 0.73                    | 22.69                | 51.08                   |
| PTGDS       | N6_carbamoylthreonyladenosine | 0.74                   | 26.64               | 0.75                    | 24.43                | 51.08                   |
| RNASE1      | arabitol                      | 0.74                   | 26.37               | 0.75                    | 24.47                | 50.84                   |
| RNASE1      | four_acetamidobutanoate       | 0.71                   | 23.26               | 0.78                    | 26.99                | 50.25                   |
| PTGDS       | creatinine                    | 0.72                   | 24.17               | 0.77                    | 26.05                | 50.22                   |
| AMBP        | X_12104                       | 0.74                   | 27.05               | 0.74                    | 22.87                | 49.92                   |
| PTGDS       | X_11826                       | 0.71                   | 23.78               | 0.77                    | 25.87                | 49.65                   |
| AMBP        | hippurate                     | 0.78                   | 31.44               | 0.68                    | 18.18                | 49.62                   |
| RNASE1      | X_04507                       | 0.74                   | 26.24               | 0.74                    | 23.38                | 49.62                   |
| PTGDS       | N2_N2_dimethylguanosine       | 0.73                   | 25.94               | 0.74                    | 23.52                | 49.47                   |
| PTGDS       | X_12742                       | 0.70                   | 22.77               | 0.77                    | 26.60                | 49.37                   |
| RNASE1      | one_methylimidazoleacetate    | 0.71                   | 23.17               | 0.77                    | 25.83                | 49.00                   |
| AMBP        | pseudouridine                 | 0.77                   | 30.07               | 0.68                    | 18.59                | 48.66                   |
| PTGDS       | X_04507                       | 0.76                   | 28.85               | 0.70                    | 19.61                | 48.46                   |
| RNASE1      | N_acetylaniline               | 0.71                   | 23.91               | 0.75                    | 24.29                | 48.21                   |
| B2M         | gulono_1_4_lactone            | 0.70                   | 23.03               | 0.76                    | 25.15                | 48.18                   |
| RNASE1      | phenylacetylglutamine         | 0.69                   | 21.70               | 0.77                    | 26.29                | 47.99                   |
| B2M         | pyridoxate                    | 0.69                   | 22.19               | 0.77                    | 25.70                | 47.89                   |
| PTGDS       | pyridoxate                    | 0.69                   | 21.56               | 0.77                    | 26.04                | 47.60                   |
| RNASE1      | X_11429                       | 0.67                   | 20.16               | 0.78                    | 27.16                | 47.32                   |
| PTGDS       | xylonate                      | 0.73                   | 25.04               | 0.73                    | 22.18                | 47.22                   |
| B2M         | X_10483                       | 0.70                   | 22.54               | 0.75                    | 24.66                | 47.20                   |
| AMBP        | X_11687                       | 0.72                   | 24.15               | 0.73                    | 22.71                | 46.86                   |
| AMBP        | four_acetamidobutanoate       | 0.71                   | 23.91               | 0.74                    | 22.85                | 46.77                   |
| RNASE1      | erythritol                    | 0.71                   | 23.87               | 0.73                    | 22.27                | 46.15                   |
| PTGDS       | X_03951                       | 0.74                   | 26.07               | 0.70                    | 19.83                | 45.90                   |
| PTGDS       | erythronate                   | 0.73                   | 25.49               | 0.71                    | 20.26                | 45.75                   |
| PTGDS       | X_11423                       | 0.73                   | 25.31               | 0.71                    | 20.43                | 45.75                   |
| RNASE1      | X_12101                       | 0.71                   | 23.73               | 0.72                    | 21.81                | 45.54                   |
| B2M         | three_indoxyl_sulfate         | 0.70                   | 22.65               | 0.74                    | 22.81                | 45.47                   |
| RNASE1      | creatinine                    | 0.73                   | 25.13               | 0.70                    | 20.09                | 45.22                   |
| RNASE1      | X_12688                       | 0.67                   | 20.28               | 0.76                    | 24.74                | 45.01                   |
| B2M         | X_12405                       | 0.69                   | 21.69               | 0.74                    | 23.31                | 45.00                   |
| RNASE1      | X_10359                       | 0.69                   | 22.14               | 0.74                    | 22.82                | 44.96                   |
| B2M         | hippurate                     | 0.74                   | 26.85               | 0.67                    | 17.81                | 44.66                   |
| AMBP        | X_05426                       | 0.75                   | 28.04               | 0.65                    | 16.40                | 44.44                   |
| PTGDS       | phenylacetylglutamine         | 0.69                   | 22.19               | 0.73                    | 22.18                | 44.36                   |
| AMBP        | erythritol                    | 0.75                   | 27.19               | 0.66                    | 17.10                | 44.29                   |
| B2M         | X_12101                       | 0.69                   | 21.78               | 0.73                    | 22.03                | 43.81                   |
| PTGDS       | X_10359                       | 0.69                   | 21.88               | 0.72                    | 21.61                | 43.49                   |
| PTGDS       | X_12405                       | 0.69                   | 21.51               | 0.73                    | 21.98                | 43.49                   |
| PTGDS       | arabitol                      | 0.73                   | 25.21               | 0.68                    | 18.26                | 43.47                   |
| RNASE1      | X_12695                       | 0.69                   | 21.71               | 0.72                    | 21.69                | 43.40                   |
| RNASE1      | threitol                      | 0.70                   | 22.38               | 0.71                    | 20.93                | 43.31                   |
| HBB         | heme                          | 0.55                   | 12.45               | 0.81                    | 30.75                | 43.20                   |
| B2M         | X_05522                       | 0.67                   | 20.29               | 0.73                    | 22.70                | 42.99                   |

| gene symbol | metabolite                     | t0 Pearson Correlation | t0 NegLog10 p-value | t24 Pearson Correlation | t24 NegLog10 p-value | Sum of NegLog10 p-value |
|-------------|--------------------------------|------------------------|---------------------|-------------------------|----------------------|-------------------------|
| PTGDS       | four_acetamidobutanoate        | 0.70                   | 23.08               | 0.70                    | 19.67                | 42.76                   |
| PTGDS       | X_11687                        | 0.68                   | 21.21               | 0.72                    | 21.41                | 42.62                   |
| AMBP        | X_12695                        | 0.70                   | 23.10               | 0.69                    | 19.35                | 42.45                   |
| AMBP        | X_05522                        | 0.67                   | 19.78               | 0.73                    | 22.63                | 42.41                   |
| PTGDS       | X_12100                        | 0.73                   | 25.78               | 0.65                    | 16.06                | 41.84                   |
| RNASE1      | X_12405                        | 0.67                   | 20.03               | 0.72                    | 21.74                | 41.77                   |
| APOA2       | X_10395                        | 0.72                   | 24.53               | 0.66                    | 17.21                | 41.74                   |
| PTGDS       | X_12695                        | 0.72                   | 24.24               | 0.66                    | 17.30                | 41.54                   |
| PTGDS       | threitol                       | 0.70                   | 22.84               | 0.68                    | 18.65                | 41.49                   |
| RNASE1      | X_11826                        | 0.63                   | 17.56               | 0.75                    | 23.78                | 41.34                   |
| CST3        | N_acetylalanine                | 0.68                   | 21.05               | 0.70                    | 20.20                | 41.25                   |
| RNASE1      | X_10483                        | 0.64                   | 17.99               | 0.74                    | 23.16                | 41.15                   |
| AMBP        | one_methylimidazoleacetate     | 0.73                   | 25.37               | 0.64                    | 15.62                | 40.99                   |
| PTGDS       | three_indoxyl_sulfate          | 0.64                   | 18.12               | 0.74                    | 22.83                | 40.95                   |
| B2M         | X_05426                        | 0.72                   | 24.57               | 0.65                    | 16.33                | 40.90                   |
| PTGDS       | pseudouridine                  | 0.74                   | 26.66               | 0.61                    | 13.96                | 40.61                   |
| AMBP        | X_12100                        | 0.70                   | 22.83               | 0.67                    | 17.41                | 40.24                   |
| AMBP        | X_12217                        | 0.64                   | 18.14               | 0.73                    | 22.06                | 40.20                   |
| B2M         | X_04504                        | 0.70                   | 23.09               | 0.66                    | 17.01                | 40.11                   |
| PTGDS       | X_12688                        | 0.69                   | 21.40               | 0.68                    | 18.63                | 40.03                   |
| RNASE1      | X_12100                        | 0.69                   | 22.05               | 0.67                    | 17.92                | 39.97                   |
| B2M         | SDMA                           | 0.63                   | 17.53               | 0.73                    | 22.37                | 39.90                   |
| PTGDS       | gulono_1_4_lactone             | 0.67                   | 19.86               | 0.69                    | 19.33                | 39.19                   |
| CST3        | N2_N2_dimethylguanosine        | 0.67                   | 20.01               | 0.69                    | 19.07                | 39.09                   |
| RNASE1      | glutaryl carnitine             | 0.64                   | 17.99               | 0.71                    | 21.06                | 39.05                   |
| AMBP        | X_11593                        | 0.66                   | 19.56               | 0.69                    | 19.29                | 38.85                   |
| AMBP        | X_11429                        | 0.66                   | 19.65               | 0.69                    | 19.19                | 38.84                   |
| AMBP        | glutaryl carnitine             | 0.67                   | 20.10               | 0.68                    | 18.63                | 38.74                   |
| PTGDS       | X_05426                        | 0.72                   | 24.30               | 0.62                    | 14.42                | 38.71                   |
| RNASE1      | three_indoxyl_sulfate          | 0.64                   | 18.26               | 0.71                    | 20.40                | 38.66                   |
| PTGDS       | hippurate                      | 0.73                   | 25.09               | 0.60                    | 13.37                | 38.46                   |
| CST3        | N6_carbamoylthreonyl adenosine | 0.63                   | 17.01               | 0.72                    | 21.45                | 38.45                   |
| B2M         | X_12794                        | 0.64                   | 17.63               | 0.71                    | 20.43                | 38.06                   |
| RNASE1      | gulono_1_4_lactone             | 0.65                   | 18.77               | 0.69                    | 19.20                | 37.97                   |
| AMBP        | X_12749                        | 0.67                   | 20.44               | 0.67                    | 17.42                | 37.87                   |
| CST3        | X_11687                        | 0.64                   | 17.86               | 0.70                    | 19.89                | 37.75                   |
| B2M         | X_12749                        | 0.66                   | 19.38               | 0.68                    | 18.34                | 37.73                   |
| CST3        | erythronate                    | 0.64                   | 17.75               | 0.70                    | 19.95                | 37.69                   |
| RNASE1      | pyridoxate                     | 0.64                   | 17.93               | 0.69                    | 19.28                | 37.21                   |
| AMBP        | X_12206                        | 0.68                   | 21.36               | 0.64                    | 15.76                | 37.12                   |
| AMBP        | threonate                      | 0.67                   | 19.83               | 0.66                    | 17.12                | 36.96                   |
| B2M         | X_12217                        | 0.61                   | 16.22               | 0.71                    | 20.73                | 36.95                   |
| B2M         | glutaryl carnitine             | 0.63                   | 17.54               | 0.69                    | 19.19                | 36.73                   |
| AMBP        | X_04629                        | 0.64                   | 17.94               | 0.68                    | 18.67                | 36.60                   |
| PTGDS       | one_methylimidazoleacetate     | 0.67                   | 20.51               | 0.65                    | 16.10                | 36.60                   |
| B2M         | X_12104                        | 0.65                   | 18.54               | 0.68                    | 18.04                | 36.59                   |
| RNASE1      | X_12104                        | 0.65                   | 19.00               | 0.67                    | 17.54                | 36.53                   |
| RNASE1      | X_05522                        | 0.62                   | 16.56               | 0.70                    | 19.89                | 36.45                   |
| PTGDS       | erythritol                     | 0.69                   | 21.41               | 0.63                    | 14.96                | 36.37                   |
| RNASE1      | X_12794                        | 0.57                   | 13.70               | 0.73                    | 22.59                | 36.30                   |
| RNASE1      | allantoin                      | 0.67                   | 19.96               | 0.65                    | 16.12                | 36.09                   |
| RNASE1      | SDMA                           | 0.60                   | 15.37               | 0.71                    | 20.65                | 36.02                   |
| PTGDS       | X_12217                        | 0.60                   | 15.33               | 0.71                    | 20.68                | 36.01                   |
| B2M         | X_04629                        | 0.62                   | 16.39               | 0.69                    | 19.48                | 35.87                   |
| CST3        | X_12100                        | 0.67                   | 19.81               | 0.65                    | 16.05                | 35.87                   |
| CST3        | X_03951                        | 0.63                   | 17.04               | 0.69                    | 18.83                | 35.87                   |

| gene symbol | metabolite                 | t0 Pearson Correlation | t0 NegLog10 p-value | t24 Pearson Correlation | t24 NegLog10 p-value | Sum of NegLog10 p-value |
|-------------|----------------------------|------------------------|---------------------|-------------------------|----------------------|-------------------------|
| AMBP        | X_12688                    | 0.68                   | 20.79               | 0.63                    | 14.98                | 35.76                   |
| B2M         | X_04498                    | 0.69                   | 21.63               | 0.61                    | 14.08                | 35.71                   |
| PTGDS       | allantoin                  | 0.70                   | 23.11               | 0.58                    | 12.57                | 35.68                   |
| PTGDS       | N_acetyllalanine           | 0.68                   | 21.17               | 0.62                    | 14.43                | 35.60                   |
| CST3        | pseudouridine              | 0.67                   | 19.81               | 0.64                    | 15.65                | 35.46                   |
| HBA1        | heme                       | 0.38                   | 5.87                | 0.80                    | 29.58                | 35.45                   |
| RNASE1      | X_12749                    | 0.64                   | 17.65               | 0.67                    | 17.78                | 35.43                   |
| B2M         | N_acetylthreonine          | 0.69                   | 21.39               | 0.61                    | 13.98                | 35.37                   |
| AMBP        | X_12611                    | 0.68                   | 21.30               | 0.61                    | 14.04                | 35.34                   |
| B2M         | X_12611                    | 0.67                   | 20.19               | 0.63                    | 15.03                | 35.22                   |
| B2M         | X_10266                    | 0.67                   | 20.16               | 0.63                    | 14.98                | 35.14                   |
| AMBP        | allantoin                  | 0.70                   | 22.75               | 0.58                    | 12.27                | 35.02                   |
| CST3        | four_acetamidobutanoate    | 0.63                   | 17.02               | 0.67                    | 17.93                | 34.95                   |
| PTGDS       | X_04504                    | 0.70                   | 22.47               | 0.58                    | 12.41                | 34.88                   |
| RNASE1      | X_04504                    | 0.67                   | 20.08               | 0.62                    | 14.75                | 34.83                   |
| AMBP        | N_acetyllalanine           | 0.69                   | 21.69               | 0.59                    | 13.09                | 34.78                   |
| CST3        | X_10483                    | 0.66                   | 19.23               | 0.63                    | 15.39                | 34.62                   |
| AMBP        | X_04504                    | 0.69                   | 21.43               | 0.60                    | 13.19                | 34.62                   |
| RNASE1      | X_12611                    | 0.64                   | 17.88               | 0.65                    | 16.56                | 34.43                   |
| TTR         | X_10395                    | 0.67                   | 20.36               | 0.61                    | 14.04                | 34.40                   |
| PTGDS       | X_11429                    | 0.65                   | 18.82               | 0.64                    | 15.51                | 34.33                   |
| CST3        | xylonate                   | 0.61                   | 16.06               | 0.68                    | 18.15                | 34.21                   |
| B2M         | X_12095                    | 0.67                   | 20.53               | 0.60                    | 13.63                | 34.16                   |
| CST3        | X_12117                    | 0.60                   | 15.10               | 0.69                    | 19.02                | 34.12                   |
| AMBP        | X_10266                    | 0.68                   | 20.90               | 0.60                    | 13.21                | 34.11                   |
| CST3        | X_11423                    | 0.58                   | 14.40               | 0.69                    | 19.46                | 33.86                   |
| AMBP        | X_12794                    | 0.58                   | 14.40               | 0.69                    | 19.34                | 33.74                   |
| CST3        | X_11334                    | 0.55                   | 12.57               | 0.72                    | 21.07                | 33.64                   |
| RNASE1      | N_acetylthreonine          | 0.62                   | 16.44               | 0.66                    | 16.96                | 33.39                   |
| B2M         | arabinose                  | 0.62                   | 16.42               | 0.66                    | 16.68                | 33.10                   |
| B2M         | X_11593                    | 0.61                   | 16.04               | 0.66                    | 17.03                | 33.07                   |
| B2M         | X_12860                    | 0.61                   | 15.76               | 0.66                    | 17.30                | 33.06                   |
| RNASE1      | X_12860                    | 0.61                   | 15.72               | 0.66                    | 17.31                | 33.03                   |
| PTGDS       | X_10483                    | 0.64                   | 17.67               | 0.63                    | 15.26                | 32.93                   |
| CST3        | one_methylimidazoleacetate | 0.59                   | 14.54               | 0.68                    | 18.36                | 32.90                   |
| CST3        | X_04507                    | 0.62                   | 16.75               | 0.64                    | 15.83                | 32.58                   |
| B2M         | X_04499                    | 0.67                   | 20.04               | 0.58                    | 12.38                | 32.43                   |
| CST3        | allantoin                  | 0.66                   | 19.44               | 0.59                    | 12.99                | 32.42                   |
| CST3        | erythritol                 | 0.62                   | 16.78               | 0.64                    | 15.57                | 32.35                   |
| CST3        | arabitol                   | 0.62                   | 16.47               | 0.64                    | 15.82                | 32.29                   |
| CST3        | X_12688                    | 0.61                   | 16.04               | 0.65                    | 16.19                | 32.23                   |
| RNASE1      | X_10266                    | 0.62                   | 16.50               | 0.64                    | 15.71                | 32.22                   |
| HBZ         | heme                       | 0.42                   | 7.20                | 0.76                    | 24.91                | 32.10                   |
| AMBP        | X_11261                    | 0.65                   | 18.84               | 0.60                    | 13.24                | 32.08                   |
| B2M         | X_12099                    | 0.68                   | 21.20               | 0.54                    | 10.75                | 31.95                   |
| HBD         | heme                       | 0.39                   | 6.25                | 0.76                    | 25.52                | 31.77                   |
| AMBP        | X_10483                    | 0.61                   | 15.69               | 0.64                    | 16.00                | 31.69                   |
| CST3        | X_12742                    | 0.56                   | 13.28               | 0.68                    | 18.38                | 31.66                   |
| CST3        | X_11429                    | 0.62                   | 16.54               | 0.63                    | 15.10                | 31.64                   |
| PTGDS       | X_12749                    | 0.65                   | 18.78               | 0.58                    | 12.63                | 31.41                   |
| B2M         | X_13553                    | 0.62                   | 16.85               | 0.62                    | 14.48                | 31.33                   |
| AMBP        | X_12101                    | 0.65                   | 18.74               | 0.58                    | 12.57                | 31.30                   |
| AMBP        | X_11315                    | -0.61                  | 16.05               | -0.63                   | 15.20                | 31.26                   |
| CST3        | phenylacetylglutamine      | 0.54                   | 12.09               | 0.69                    | 18.87                | 30.96                   |
| CST3        | X_12695                    | 0.61                   | 15.66               | 0.63                    | 15.03                | 30.68                   |
| B2M         | X_12206                    | 0.65                   | 18.39               | 0.58                    | 12.27                | 30.65                   |



| gene symbol | metabolite               | t0 Pearson Correlation | t0 NegLog10 p-value | t24 Pearson Correlation | t24 NegLog10 p-value | Sum of NegLog10 p-value |
|-------------|--------------------------|------------------------|---------------------|-------------------------|----------------------|-------------------------|
| PTGDS       | glutaroylcarnitine       | 0.60                   | 15.40               | 0.63                    | 15.18                | 30.58                   |
| PTGDS       | X_12101                  | 0.64                   | 17.60               | 0.59                    | 12.89                | 30.49                   |
| PTGDS       | X_05522                  | 0.60                   | 15.48               | 0.63                    | 14.99                | 30.47                   |
| RNASE1      | arabinose                | 0.60                   | 15.11               | 0.63                    | 15.33                | 30.44                   |
| RNASE1      | X_04498                  | 0.62                   | 16.87               | 0.60                    | 13.56                | 30.43                   |
| PTGDS       | X_10266                  | 0.64                   | 17.91               | 0.58                    | 12.51                | 30.42                   |
| RNASE1      | hippurate                | 0.62                   | 16.63               | 0.61                    | 13.75                | 30.38                   |
| AMBP        | X_02249                  | 0.63                   | 17.44               | 0.59                    | 12.72                | 30.15                   |
| CST3        | X_13553                  | 0.64                   | 17.77               | 0.57                    | 12.04                | 29.81                   |
| APOA1       | X_10395                  | 0.61                   | 16.02               | 0.61                    | 13.76                | 29.78                   |
| AMBP        | X_12092                  | 0.61                   | 16.23               | 0.60                    | 13.42                | 29.65                   |
| B2M         | X_12802                  | 0.55                   | 12.47               | 0.66                    | 17.08                | 29.56                   |
| PTGDS       | X_04629                  | 0.58                   | 14.05               | 0.64                    | 15.46                | 29.51                   |
| CST3        | X_12101                  | 0.59                   | 14.84               | 0.62                    | 14.64                | 29.48                   |
| CST3        | SDMA                     | 0.63                   | 17.12               | 0.58                    | 12.30                | 29.41                   |
| CST3        | X_12794                  | 0.56                   | 13.28               | 0.64                    | 16.00                | 29.28                   |
| RNASE1      | X_05426                  | 0.62                   | 16.83               | 0.58                    | 12.19                | 29.02                   |
| RNASE1      | X_04629                  | 0.55                   | 12.66               | 0.65                    | 16.26                | 28.92                   |
| CST3        | X_04499                  | 0.63                   | 17.44               | 0.56                    | 11.43                | 28.87                   |
| RNASE1      | X_12095                  | 0.58                   | 14.13               | 0.62                    | 14.65                | 28.78                   |
| RNASE1      | X_11593                  | 0.55                   | 12.60               | 0.64                    | 15.77                | 28.36                   |
| RNASE1      | X_04499                  | 0.60                   | 15.44               | 0.58                    | 12.63                | 28.07                   |
| PTGDS       | X_12104                  | 0.63                   | 17.41               | 0.54                    | 10.62                | 28.03                   |
| B2M         | myo_inositol             | 0.60                   | 15.58               | 0.58                    | 12.41                | 27.99                   |
| B2M         | X_12092                  | 0.61                   | 16.07               | 0.57                    | 11.89                | 27.96                   |
| CST3        | X_11826                  | 0.51                   | 10.46               | 0.67                    | 17.46                | 27.92                   |
| B2M         | mannitol                 | 0.63                   | 17.52               | 0.54                    | 10.39                | 27.91                   |
| AMBP        | myo_inositol             | 0.60                   | 15.15               | 0.58                    | 12.66                | 27.81                   |
| RNASE1      | X_12217                  | 0.53                   | 11.46               | 0.65                    | 16.19                | 27.66                   |
| CST3        | threitol                 | 0.56                   | 13.18               | 0.62                    | 14.35                | 27.53                   |
| AMBP        | one_five_anhydroglucitol | -0.58                  | 14.01               | -0.60                   | 13.45                | 27.46                   |
| AMBP        | X_12095                  | 0.59                   | 14.96               | 0.58                    | 12.33                | 27.30                   |
| PTGDS       | X_02249                  | 0.53                   | 11.39               | 0.64                    | 15.77                | 27.16                   |
| CST3        | X_04498                  | 0.64                   | 17.99               | 0.50                    | 9.09                 | 27.07                   |
| PTGDS       | X_11593                  | 0.56                   | 13.27               | 0.60                    | 13.60                | 26.87                   |
| AMBP        | arabinose                | 0.58                   | 14.21               | 0.58                    | 12.66                | 26.87                   |
| RNASE1      | X_12802                  | 0.50                   | 10.08               | 0.66                    | 16.78                | 26.86                   |
| AMBP        | X_12099                  | 0.66                   | 19.02               | 0.46                    | 7.60                 | 26.63                   |
| CST3        | X_10359                  | 0.54                   | 12.14               | 0.62                    | 14.44                | 26.58                   |
| CST3        | X_12860                  | 0.56                   | 12.86               | 0.60                    | 13.70                | 26.57                   |
| PTGDS       | X_12611                  | 0.62                   | 16.70               | 0.52                    | 9.86                 | 26.56                   |
| RNASE1      | X_12099                  | 0.61                   | 15.66               | 0.55                    | 10.89                | 26.55                   |
| AMBP        | gluconate                | 0.68                   | 21.35               | 0.38                    | 5.09                 | 26.44                   |
| RNASE1      | X_13553                  | 0.54                   | 12.18               | 0.61                    | 14.24                | 26.41                   |
| CST3        | X_12611                  | 0.57                   | 13.34               | 0.59                    | 13.00                | 26.34                   |
| CST3        | gulono_1_4_lactone       | 0.53                   | 11.44               | 0.63                    | 14.84                | 26.28                   |
| PTGDS       | threonate                | 0.56                   | 13.10               | 0.59                    | 13.12                | 26.22                   |
| PTGDS       | X_12206                  | 0.59                   | 14.91               | 0.56                    | 11.30                | 26.21                   |
| CST3        | N_acetylthreonine        | 0.60                   | 15.14               | 0.55                    | 11.03                | 26.17                   |
| RNASE1      | X_11261                  | 0.60                   | 15.42               | 0.54                    | 10.72                | 26.14                   |
| CST3        | pyridoxate               | 0.45                   | 8.22                | 0.67                    | 17.74                | 25.96                   |
| CST3        | X_05522                  | 0.52                   | 11.14               | 0.62                    | 14.50                | 25.64                   |
| B2M         | X_11261                  | 0.61                   | 15.97               | 0.51                    | 9.41                 | 25.38                   |
| PTGDS       | X_12095                  | 0.61                   | 15.65               | 0.52                    | 9.73                 | 25.38                   |
| CST3        | arabinose                | 0.54                   | 11.76               | 0.60                    | 13.44                | 25.21                   |
| RNASE1      | X_12206                  | 0.60                   | 15.27               | 0.53                    | 9.92                 | 25.19                   |

| gene symbol | metabolite             | t0 Pearson Correlation | t0 NegLog10 p-value | t24 Pearson Correlation | t24 NegLog10 p-value | Sum of NegLog10 p-value |
|-------------|------------------------|------------------------|---------------------|-------------------------|----------------------|-------------------------|
| CST3        | X_04504                | 0.61                   | 15.73               | 0.51                    | 9.44                 | 25.17                   |
| B2M         | phenol_sulfate         | 0.56                   | 12.93               | 0.58                    | 12.17                | 25.10                   |
| PTGDS       | X_12794                | 0.56                   | 12.87               | 0.58                    | 12.18                | 25.06                   |
| RNASE1      | X_12092                | 0.56                   | 13.15               | 0.57                    | 11.85                | 25.01                   |
| CST3        | glutaryl carnitine     | 0.56                   | 12.80               | 0.58                    | 12.20                | 24.99                   |
| PTGDS       | SDMA                   | 0.57                   | 13.77               | 0.55                    | 11.13                | 24.91                   |
| RNASE1      | urea                   | 0.52                   | 11.15               | 0.60                    | 13.54                | 24.68                   |
| CST3        | X_12802                | 0.52                   | 11.02               | 0.60                    | 13.60                | 24.62                   |
| CST3        | X_12095                | 0.56                   | 12.86               | 0.57                    | 11.74                | 24.60                   |
| AMBP        | X_11437                | 0.57                   | 13.51               | 0.55                    | 11.08                | 24.59                   |
| RNASE1      | myo_inositol           | 0.56                   | 12.84               | 0.57                    | 11.69                | 24.53                   |
| B2M         | threonate              | 0.58                   | 13.86               | 0.54                    | 10.66                | 24.52                   |
| PTGDS       | myo_inositol           | 0.54                   | 12.04               | 0.58                    | 12.42                | 24.46                   |
| CST3        | hippurate              | 0.55                   | 12.64               | 0.56                    | 11.61                | 24.25                   |
| VWF         | X_11538                | 0.41                   | 6.78                | 0.66                    | 17.17                | 23.94                   |
| AMBP        | quininate              | 0.55                   | 12.65               | 0.56                    | 11.28                | 23.94                   |
| CST3        | creatinine             | 0.50                   | 10.23               | 0.60                    | 13.48                | 23.71                   |
| AMBP        | X_04498                | 0.61                   | 15.75               | 0.47                    | 7.86                 | 23.61                   |
| PTGDS       | arabinose              | 0.59                   | 14.45               | 0.51                    | 9.15                 | 23.60                   |
| AZGP1       | X_12104                | 0.53                   | 11.54               | 0.57                    | 12.01                | 23.55                   |
| SAA1        | X_11786                | -0.52                  | 11.02               | -0.58                   | 12.43                | 23.46                   |
| C7          | taurochenodeoxycholate | 0.53                   | 11.43               | 0.57                    | 11.83                | 23.26                   |
| APOE        | cholesterol            | 0.57                   | 13.62               | 0.52                    | 9.63                 | 23.25                   |
| B2M         | X_11315                | -0.54                  | 12.03               | -0.55                   | 11.12                | 23.15                   |
| AMBP        | SDMA                   | 0.56                   | 13.15               | 0.53                    | 9.93                 | 23.09                   |
| AMBP        | pantothenate           | 0.49                   | 9.73                | 0.60                    | 13.32                | 23.06                   |
| B2M         | N_acetylneuraminate    | 0.49                   | 9.90                | 0.59                    | 13.09                | 22.99                   |
| CST3        | X_12405                | 0.48                   | 9.49                | 0.60                    | 13.31                | 22.80                   |
| APOB        | cholesterol            | 0.49                   | 9.84                | 0.59                    | 12.95                | 22.79                   |
| AMBP        | X_12802                | 0.49                   | 9.82                | 0.59                    | 12.81                | 22.63                   |
| PTGDS       | X_04498                | 0.61                   | 15.75               | 0.44                    | 6.86                 | 22.61                   |
| VWF         | HPLA                   | 0.60                   | 15.18               | 0.45                    | 7.21                 | 22.39                   |
| CST3        | X_12749                | 0.48                   | 9.35                | 0.59                    | 12.96                | 22.31                   |
| B2M         | quininate              | 0.56                   | 12.88               | 0.51                    | 9.38                 | 22.25                   |
| RNASE1      | N_acetylneuraminate    | 0.44                   | 7.80                | 0.62                    | 14.44                | 22.24                   |
| AMBP        | X_04499                | 0.57                   | 13.76               | 0.49                    | 8.43                 | 22.19                   |
| PTGDS       | indolelactate          | 0.54                   | 11.91               | 0.53                    | 10.20                | 22.10                   |
| B2M         | prolylhydroxyproline   | 0.50                   | 10.06               | 0.57                    | 11.97                | 22.03                   |
| AMBP        | carnitine              | -0.50                  | 10.29               | -0.56                   | 11.65                | 21.94                   |
| B2M         | X_02249                | 0.57                   | 13.56               | 0.48                    | 8.35                 | 21.91                   |
| PTGDS       | X_12099                | 0.60                   | 15.57               | 0.42                    | 6.34                 | 21.91                   |
| AMBP        | phenol_sulfate         | 0.56                   | 13.18               | 0.49                    | 8.61                 | 21.79                   |
| RNASE1      | X_02249                | 0.54                   | 12.21               | 0.52                    | 9.57                 | 21.79                   |
| LBP         | one_linoleoyl_GPC      | -0.52                  | 11.25               | -0.54                   | 10.53                | 21.79                   |
| B2M         | urea                   | 0.56                   | 13.18               | 0.49                    | 8.56                 | 21.74                   |
| RNASE1      | X_03056                | 0.45                   | 8.19                | 0.60                    | 13.51                | 21.70                   |
| AMBP        | N_acetylthreonine      | 0.59                   | 14.95               | 0.43                    | 6.66                 | 21.61                   |
| CST3        | N_acetylneuraminate    | 0.49                   | 9.52                | 0.57                    | 11.97                | 21.49                   |
| LGALS3BP    | taurochenodeoxycholate | 0.54                   | 11.81               | 0.52                    | 9.62                 | 21.43                   |
| CST3        | X_11593                | 0.41                   | 6.89                | 0.62                    | 14.49                | 21.38                   |
| CST3        | X_12099                | 0.55                   | 12.48               | 0.50                    | 8.87                 | 21.35                   |
| SAA3P       | X_11786                | -0.50                  | 10.31               | -0.55                   | 11.03                | 21.33                   |
| PTGDS       | X_11315                | -0.54                  | 12.17               | -0.51                   | 9.13                 | 21.30                   |
| HPX         | taurochenodeoxycholate | -0.54                  | 11.94               | -0.51                   | 9.32                 | 21.27                   |
| PTGDS       | X_11261                | 0.54                   | 11.78               | 0.51                    | 9.47                 | 21.25                   |
| CST3        | X_12217                | 0.48                   | 9.26                | 0.57                    | 11.98                | 21.24                   |

| gene symbol | metabolite               | t0 Pearson Correlation | t0 NegLog10 p-value | t24 Pearson Correlation | t24 NegLog10 p-value | Sum of NegLog10 p-value |
|-------------|--------------------------|------------------------|---------------------|-------------------------|----------------------|-------------------------|
| B2M         | indolelactate            | 0.55                   | 12.46               | 0.50                    | 8.76                 | 21.21                   |
| RBP4        | pyridoxate               | 0.39                   | 6.19                | 0.63                    | 15.00                | 21.20                   |
| AMBP        | X_12860                  | 0.53                   | 11.73               | 0.51                    | 9.45                 | 21.19                   |
| RNASE1      | X_11315                  | -0.53                  | 11.73               | -0.51                   | 9.46                 | 21.19                   |
| CST3        | prolylhydroxyproline     | 0.50                   | 9.95                | 0.55                    | 11.21                | 21.15                   |
| LBP         | one_palmitoyl_GPC        | -0.56                  | 13.11               | -0.47                   | 7.99                 | 21.10                   |
| B2M         | X_03056                  | 0.50                   | 10.15               | 0.55                    | 10.86                | 21.01                   |
| PTGDS       | four_vinylphenol_sulfate | 0.45                   | 8.09                | 0.59                    | 12.89                | 20.98                   |
| B2M         | one_five_anhydroglucitol | -0.50                  | 10.25               | -0.54                   | 10.72                | 20.98                   |
| GPX3        | tyrosine                 | 0.64                   | 17.64               | 0.30                    | 3.33                 | 20.97                   |
| APOC3       | X_08402                  | 0.58                   | 13.86               | 0.45                    | 7.06                 | 20.92                   |
| CST3        | HPLA                     | 0.61                   | 15.99               | 0.37                    | 4.90                 | 20.89                   |
| CST3        | three_indoxyl_sulfate    | 0.43                   | 7.53                | 0.60                    | 13.27                | 20.80                   |
| AMBP        | X_11444                  | 0.51                   | 10.66               | 0.53                    | 10.09                | 20.75                   |
| PPBP        | AMP                      | 0.61                   | 15.74               | 0.37                    | 4.98                 | 20.72                   |
| APOA4       | X_09789                  | 0.55                   | 12.56               | 0.48                    | 8.14                 | 20.70                   |
| KNG1        | X_10395                  | 0.54                   | 11.76               | 0.50                    | 8.88                 | 20.64                   |
| ORM1        | X_03056                  | 0.54                   | 12.03               | 0.49                    | 8.59                 | 20.62                   |
| RNASE1      | indolelactate            | 0.54                   | 12.08               | 0.49                    | 8.54                 | 20.62                   |
| AMBP        | sucrose                  | 0.47                   | 8.98                | 0.56                    | 11.61                | 20.59                   |
| AMBP        | mannitol                 | 0.58                   | 14.42               | 0.42                    | 6.16                 | 20.58                   |
| CST3        | myo_inositol             | 0.50                   | 10.20               | 0.53                    | 10.31                | 20.51                   |
| LBP         | one_oleoyl_GPC           | -0.52                  | 10.85               | -0.52                   | 9.64                 | 20.49                   |
| HPR         | mannose                  | 0.48                   | 9.32                | 0.55                    | 11.17                | 20.49                   |
| CST3        | urea                     | 0.53                   | 11.52               | 0.50                    | 8.95                 | 20.46                   |
| RNASE1      | mannitol                 | 0.53                   | 11.31               | 0.50                    | 9.09                 | 20.40                   |
| HPX         | taurocholate             | -0.52                  | 11.25               | -0.50                   | 9.03                 | 20.29                   |
| CFD         | X_12742                  | 0.51                   | 10.43               | 0.52                    | 9.85                 | 20.28                   |
| CST3        | X_10266                  | 0.50                   | 10.12               | 0.53                    | 10.11                | 20.22                   |
| AMBP        | catechol_sulfate         | 0.56                   | 13.23               | 0.44                    | 6.84                 | 20.08                   |
| CST3        | mannitol                 | 0.54                   | 12.22               | 0.47                    | 7.83                 | 20.05                   |
| AFM         | X_10395                  | 0.54                   | 11.81               | 0.48                    | 8.24                 | 20.05                   |
| PTGDS       | X_12092                  | 0.53                   | 11.32               | 0.49                    | 8.73                 | 20.05                   |
| SAA1        | one_palmitoleoyl_GPC     | -0.57                  | 13.72               | -0.42                   | 6.24                 | 19.96                   |
| GPX3        | methionine               | 0.60                   | 15.18               | 0.37                    | 4.76                 | 19.94                   |
| PTGDS       | X_04499                  | 0.57                   | 13.69               | 0.42                    | 6.10                 | 19.80                   |
| AMBP        | p_cresol_sulfate         | 0.53                   | 11.51               | 0.48                    | 8.27                 | 19.78                   |
| AMBP        | four_vinylphenol_sulfate | 0.47                   | 8.91                | 0.55                    | 10.86                | 19.77                   |
| AMBP        | prolylhydroxyproline     | 0.50                   | 10.11               | 0.52                    | 9.64                 | 19.75                   |
| PTGDS       | phenol_sulfate           | 0.52                   | 11.15               | 0.49                    | 8.60                 | 19.75                   |
| C7          | glycochenodeoxycholate   | 0.47                   | 8.94                | 0.54                    | 10.77                | 19.71                   |
| CFD         | X_11334                  | 0.49                   | 9.53                | 0.53                    | 10.16                | 19.69                   |
| CFD         | creatinine               | 0.52                   | 11.12               | 0.49                    | 8.55                 | 19.68                   |
| CST3        | X_12104                  | 0.42                   | 7.14                | 0.58                    | 12.49                | 19.63                   |
| CST3        | X_04629                  | 0.44                   | 7.73                | 0.57                    | 11.87                | 19.60                   |
| B2M         | sucrose                  | 0.49                   | 9.89                | 0.52                    | 9.68                 | 19.57                   |
| APOC1       | X_08402                  | 0.51                   | 10.71               | 0.50                    | 8.85                 | 19.57                   |
| CFHR2       | X_03951                  | 0.51                   | 10.79               | 0.50                    | 8.77                 | 19.56                   |
| PTGDS       | mannitol                 | 0.60                   | 15.35               | 0.34                    | 4.14                 | 19.49                   |
| VWF         | octadecanedioate         | 0.41                   | 6.77                | 0.59                    | 12.67                | 19.44                   |
| AMBP        | X_12844                  | 0.48                   | 9.12                | 0.53                    | 10.31                | 19.43                   |
| CST3        | X_12206                  | 0.47                   | 9.07                | 0.54                    | 10.34                | 19.41                   |
| RNASE1      | one_five_anhydroglucitol | -0.47                  | 8.96                | -0.54                   | 10.43                | 19.39                   |
| PTGDS       | N_acetylthreonine        | 0.57                   | 13.48               | 0.41                    | 5.89                 | 19.37                   |
| C1QB        | HPLA                     | 0.60                   | 15.24               | 0.34                    | 4.09                 | 19.33                   |
| PTGDS       | carnitine                | -0.48                  | 9.40                | -0.52                   | 9.87                 | 19.27                   |

| gene symbol | metabolite                    | t0 Pearson Correlation | t0 NegLog10 p-value | t24 Pearson Correlation | t24 NegLog10 p-value | Sum of NegLog10 p-value |
|-------------|-------------------------------|------------------------|---------------------|-------------------------|----------------------|-------------------------|
| AZGP1       | X_11423                       | 0.51                   | 10.65               | 0.49                    | 8.59                 | 19.23                   |
| CST3        | X_03056                       | 0.49                   | 9.59                | 0.52                    | 9.57                 | 19.16                   |
| APOB        | X_03094                       | 0.50                   | 10.00               | 0.50                    | 9.11                 | 19.11                   |
| LBP         | one_stearoyl_GPC              | -0.52                  | 11.05               | -0.48                   | 8.04                 | 19.09                   |
| PTGDS       | X_13553                       | 0.52                   | 11.01               | 0.48                    | 8.06                 | 19.07                   |
| AZGP1       | X_03951                       | 0.50                   | 10.27               | 0.50                    | 8.79                 | 19.06                   |
| CFD         | X_04507                       | 0.46                   | 8.46                | 0.54                    | 10.55                | 19.01                   |
| RNASE1      | prolylhydroxyproline          | 0.45                   | 8.11                | 0.55                    | 10.87                | 18.98                   |
| LCN2        | HPLA                          | 0.46                   | 8.65                | 0.53                    | 10.21                | 18.86                   |
| AMBP        | N_acetylneuraminate           | 0.45                   | 8.30                | 0.54                    | 10.51                | 18.81                   |
| RNASE1      | sucrose                       | 0.44                   | 7.79                | 0.55                    | 11.02                | 18.81                   |
| RNASE1      | phosphate                     | 0.41                   | 6.67                | 0.57                    | 12.13                | 18.81                   |
| AZGP1       | threitol                      | 0.49                   | 9.71                | 0.50                    | 9.02                 | 18.73                   |
| LCN2        | N2_N2_dimethylguanosine       | 0.47                   | 8.80                | 0.52                    | 9.85                 | 18.65                   |
| VWF         | hexadecanedioate              | 0.36                   | 5.18                | 0.60                    | 13.38                | 18.55                   |
| RNASE1      | phenol_sulfate                | 0.48                   | 9.34                | 0.51                    | 9.13                 | 18.47                   |
| LCN2        | X_12794                       | 0.45                   | 8.30                | 0.53                    | 10.17                | 18.46                   |
| RNASE1      | X_04495                       | 0.51                   | 10.40               | 0.48                    | 8.06                 | 18.46                   |
| SAA1        | one_stearoyl_GPC              | -0.53                  | 11.75               | -0.44                   | 6.69                 | 18.44                   |
| LCN2        | four_acetamidobutanoate       | 0.46                   | 8.69                | 0.52                    | 9.63                 | 18.31                   |
| CST3        | deoxycarnitine                | 0.54                   | 12.18               | 0.42                    | 6.09                 | 18.27                   |
| PTGDS       | quininate                     | 0.45                   | 8.15                | 0.53                    | 10.06                | 18.21                   |
| CFD         | N6_carbamoylthreonyladenosine | 0.44                   | 7.58                | 0.54                    | 10.60                | 18.18                   |
| LGALS3BP    | taurocholate                  | 0.48                   | 9.28                | 0.50                    | 8.87                 | 18.15                   |
| ULK4        | taurochenodeoxycholate        | -0.60                  | 15.30               | -0.27                   | 2.82                 | 18.12                   |
| SAA3P       | one_palmitoleoyl_GPC          | -0.56                  | 13.03               | -0.38                   | 5.08                 | 18.11                   |
| VTN         | X_12095                       | -0.47                  | 9.00                | -0.50                   | 9.09                 | 18.09                   |
| RNASE1      | threonate                     | 0.51                   | 10.43               | 0.46                    | 7.64                 | 18.07                   |
| B2M         | gluconate                     | 0.57                   | 13.66               | 0.35                    | 4.36                 | 18.02                   |
| B2M         | X_04495                       | 0.51                   | 10.73               | 0.45                    | 7.19                 | 17.93                   |
| CFD         | erythronate                   | 0.42                   | 6.98                | 0.55                    | 10.94                | 17.92                   |
| CST3        | X_05426                       | 0.52                   | 11.08               | 0.44                    | 6.84                 | 17.92                   |
| RBP4        | X_09789                       | 0.44                   | 7.83                | 0.53                    | 10.09                | 17.92                   |
| HP          | mannose                       | 0.40                   | 6.55                | 0.56                    | 11.35                | 17.90                   |
| CFD         | X_11423                       | 0.40                   | 6.33                | 0.56                    | 11.56                | 17.90                   |
| REG1A       | one_methylimidazoleacetate    | 0.36                   | 5.32                | 0.58                    | 12.57                | 17.89                   |
| ORM2        | X_03056                       | 0.49                   | 9.85                | 0.48                    | 8.03                 | 17.88                   |
| CST3        | tiglyl_carnitine              | 0.46                   | 8.62                | 0.51                    | 9.26                 | 17.88                   |
| PTGDS       | X_12860                       | 0.47                   | 8.97                | 0.50                    | 8.90                 | 17.88                   |
| LCN2        | N_acetylaniline               | 0.45                   | 8.21                | 0.52                    | 9.62                 | 17.83                   |
| RNASE1      | gluconate                     | 0.57                   | 13.34               | 0.35                    | 4.41                 | 17.75                   |
| CFD         | arabitol                      | 0.44                   | 7.63                | 0.53                    | 10.12                | 17.74                   |
| APOC3       | one_stearoylglycerol          | 0.54                   | 11.99               | 0.40                    | 5.70                 | 17.69                   |
| B2M         | X_11437                       | 0.51                   | 10.55               | 0.45                    | 7.10                 | 17.64                   |
| CFD         | xylonate                      | 0.43                   | 7.48                | 0.53                    | 10.15                | 17.63                   |
| LBP         | one_palmitoleoyl_GPC          | -0.52                  | 11.23               | -0.43                   | 6.39                 | 17.62                   |
| TIMP1       | one_palmitoyl_GPC             | -0.39                  | 6.14                | -0.56                   | 11.47                | 17.62                   |
| AZGP1       | xylonate                      | 0.47                   | 8.98                | 0.49                    | 8.64                 | 17.61                   |
| APOB        | X_10744                       | 0.47                   | 8.95                | 0.49                    | 8.62                 | 17.57                   |
| C7          | taurocholate                  | 0.45                   | 8.09                | 0.51                    | 9.47                 | 17.57                   |
| B2M         | four_vinylphenol_sulfate      | 0.45                   | 8.13                | 0.51                    | 9.42                 | 17.55                   |
| RNASE1      | glutamylvaline                | 0.45                   | 8.17                | 0.51                    | 9.35                 | 17.52                   |
| SAA3P       | X_12794                       | 0.49                   | 9.62                | 0.47                    | 7.86                 | 17.48                   |
| LYZ         | creatinine                    | 0.60                   | 15.24               | 0.24                    | 2.21                 | 17.44                   |
| CFHR2       | phenylacetylglutamine         | 0.48                   | 9.11                | 0.48                    | 8.31                 | 17.42                   |
| SAA1        | mannose                       | 0.48                   | 9.44                | 0.47                    | 7.98                 | 17.41                   |

| gene symbol | metabolite                    | t0 Pearson Correlation | t0 NegLog10 p-value | t24 Pearson Correlation | t24 NegLog10 p-value | Sum of NegLog10 p-value |
|-------------|-------------------------------|------------------------|---------------------|-------------------------|----------------------|-------------------------|
| FCGBP       | octanoylcarnitine             | 0.45                   | 8.09                | 0.51                    | 9.24                 | 17.34                   |
| AZGP1       | urea                          | 0.50                   | 10.17               | 0.45                    | 7.17                 | 17.34                   |
| SAA1        | one_palmitoyl_GPC             | -0.55                  | 12.34               | -0.37                   | 4.95                 | 17.29                   |
| SAA3P       | one_stearoyl_GPC              | -0.53                  | 11.31               | -0.41                   | 5.95                 | 17.26                   |
| C7          | X_14658                       | 0.46                   | 8.53                | 0.49                    | 8.72                 | 17.25                   |
| LCN2        | one_palmitoyl_GPC             | -0.32                  | 4.12                | -0.59                   | 13.13                | 17.24                   |
| APOC1       | X_03094                       | 0.53                   | 11.62               | 0.40                    | 5.58                 | 17.20                   |
| B2M         | xylose                        | 0.41                   | 6.73                | 0.54                    | 10.47                | 17.19                   |
| PTGDS       | X_12802                       | 0.46                   | 8.50                | 0.49                    | 8.68                 | 17.18                   |
| AZGP1       | X_04507                       | 0.46                   | 8.42                | 0.50                    | 8.74                 | 17.16                   |
| AMBP        | xylose                        | 0.38                   | 5.81                | 0.56                    | 11.34                | 17.15                   |
| RNASE1      | p_cresol_sulfate              | 0.48                   | 9.27                | 0.47                    | 7.88                 | 17.15                   |
| VTN         | X_04498                       | -0.48                  | 9.15                | -0.47                   | 8.00                 | 17.15                   |
| CFD         | X_12101                       | 0.47                   | 8.74                | 0.49                    | 8.38                 | 17.12                   |
| AZGP1       | phenylacetylglutamine         | 0.48                   | 9.17                | 0.47                    | 7.95                 | 17.12                   |
| RBP4        | threitol                      | 0.35                   | 5.00                | 0.57                    | 12.11                | 17.11                   |
| AMBP        | p_acetamidophenylglucuronide  | 0.38                   | 5.88                | 0.56                    | 11.23                | 17.11                   |
| RBP4        | creatinine                    | 0.37                   | 5.48                | 0.56                    | 11.61                | 17.09                   |
| SAA3P       | one_palmitoyl_GPC             | -0.55                  | 12.75               | -0.35                   | 4.33                 | 17.08                   |
| PON1        | X_10395                       | 0.50                   | 10.08               | 0.44                    | 6.97                 | 17.05                   |
| LCN2        | X_10483                       | 0.45                   | 8.09                | 0.50                    | 8.93                 | 17.03                   |
| HPX         | X_14658                       | -0.50                  | 10.07               | -0.44                   | 6.93                 | 16.99                   |
| RBP4        | three_indoxyl_sulfate         | 0.37                   | 5.63                | 0.56                    | 11.36                | 16.99                   |
| ORM2        | X_12794                       | 0.46                   | 8.50                | 0.49                    | 8.49                 | 16.99                   |
| RBP4        | X_10359                       | 0.37                   | 5.53                | 0.56                    | 11.43                | 16.96                   |
| CFHR2       | gulono_1_4_lactone            | 0.51                   | 10.45               | 0.43                    | 6.49                 | 16.93                   |
| RNASE1      | quininate                     | 0.46                   | 8.39                | 0.49                    | 8.54                 | 16.93                   |
| APOC2       | X_03094                       | 0.49                   | 9.67                | 0.45                    | 7.25                 | 16.93                   |
| RNASE1      | tiglyl_carnitine              | 0.39                   | 6.17                | 0.54                    | 10.74                | 16.91                   |
| CFHR2       | threitol                      | 0.50                   | 10.11               | 0.44                    | 6.79                 | 16.90                   |
| PTGDS       | gluconate                     | 0.53                   | 11.73               | 0.38                    | 5.14                 | 16.87                   |
| PTGDS       | three_methylhistidine         | 0.52                   | 11.25               | 0.40                    | 5.62                 | 16.87                   |
| AMBP        | glutamylvaline                | 0.53                   | 11.48               | 0.39                    | 5.38                 | 16.86                   |
| AMBP        | three_methylhistidine         | 0.50                   | 10.02               | 0.44                    | 6.84                 | 16.86                   |
| AZGP1       | X_12117                       | 0.45                   | 8.02                | 0.50                    | 8.76                 | 16.78                   |
| APOC3       | X_06346                       | 0.48                   | 9.46                | 0.45                    | 7.24                 | 16.70                   |
| CFD         | X_11687                       | 0.42                   | 7.21                | 0.51                    | 9.47                 | 16.68                   |
| CFD         | phenylacetylglutamine         | 0.40                   | 6.55                | 0.53                    | 10.13                | 16.68                   |
| AZGP1       | X_10359                       | 0.48                   | 9.25                | 0.46                    | 7.43                 | 16.68                   |
| RBP4        | threonate                     | 0.37                   | 5.38                | 0.56                    | 11.28                | 16.66                   |
| ORM1        | tryptophan                    | -0.43                  | 7.28                | -0.51                   | 9.36                 | 16.64                   |
| CFD         | X_10359                       | 0.43                   | 7.49                | 0.51                    | 9.15                 | 16.64                   |
| B2M         | phosphate                     | 0.42                   | 6.93                | 0.52                    | 9.69                 | 16.62                   |
| RBP4        | X_11334                       | 0.37                   | 5.44                | 0.55                    | 11.13                | 16.57                   |
| APOD        | X_10510                       | 0.52                   | 10.97               | 0.40                    | 5.57                 | 16.54                   |
| LGALS3BP    | glycochenodeoxycholate        | 0.48                   | 9.16                | 0.46                    | 7.36                 | 16.52                   |
| PTGDS       | pantothenate                  | 0.40                   | 6.53                | 0.53                    | 9.95                 | 16.48                   |
| PTGDS       | catechol_sulfate              | 0.44                   | 7.62                | 0.50                    | 8.86                 | 16.47                   |
| LCN2        | X_11687                       | 0.44                   | 7.65                | 0.50                    | 8.79                 | 16.45                   |
| ORM1        | X_12794                       | 0.47                   | 8.94                | 0.46                    | 7.50                 | 16.44                   |
| PTGDS       | sucrose                       | 0.45                   | 8.20                | 0.48                    | 8.24                 | 16.44                   |
| LCN2        | N6_carbamoylthreonyladenosine | 0.42                   | 7.21                | 0.51                    | 9.22                 | 16.43                   |
| AZGP1       | X_12095                       | 0.41                   | 6.77                | 0.52                    | 9.66                 | 16.42                   |
| AMBP        | choline                       | 0.44                   | 7.79                | 0.49                    | 8.60                 | 16.39                   |
| B2M         | pantothenate                  | 0.44                   | 7.75                | 0.49                    | 8.60                 | 16.34                   |
| C1QA        | HPLA                          | 0.51                   | 10.60               | 0.40                    | 5.71                 | 16.31                   |

| gene symbol | metabolite               | t0 Pearson Correlation | t0 NegLog10 p-value | t24 Pearson Correlation | t24 NegLog10 p-value | Sum of NegLog10 p-value |
|-------------|--------------------------|------------------------|---------------------|-------------------------|----------------------|-------------------------|
| AZGP1       | arabitol                 | 0.48                   | 9.36                | 0.44                    | 6.91                 | 16.27                   |
| PTGDS       | X_03056                  | 0.50                   | 10.12               | 0.42                    | 6.08                 | 16.21                   |
| C7          | seven_HOCA               | 0.45                   | 8.09                | 0.48                    | 8.12                 | 16.20                   |
| CFD         | X_03951                  | 0.39                   | 6.02                | 0.53                    | 10.16                | 16.19                   |
| CST3        | X_12855                  | 0.49                   | 9.53                | 0.43                    | 6.64                 | 16.17                   |
| APOC1       | X_06346                  | 0.47                   | 9.06                | 0.45                    | 7.11                 | 16.17                   |
| LYZ         | X_05426                  | 0.55                   | 12.72               | 0.31                    | 3.43                 | 16.15                   |
| RNASE1      | X_11444                  | 0.47                   | 8.96                | 0.45                    | 7.19                 | 16.15                   |
| CFD         | allantoin                | 0.47                   | 8.86                | 0.45                    | 7.29                 | 16.15                   |
| CFHR2       | X_11423                  | 0.48                   | 9.17                | 0.44                    | 6.96                 | 16.14                   |
| LYZ         | X_10359                  | 0.57                   | 13.49               | 0.26                    | 2.64                 | 16.13                   |
| AMBP        | urea                     | 0.49                   | 9.79                | 0.42                    | 6.31                 | 16.10                   |
| LBP         | one_arachidoyl_GPE       | -0.48                  | 9.24                | -0.44                   | 6.86                 | 16.09                   |
| CFHR2       | X_10359                  | 0.50                   | 10.16               | 0.41                    | 5.93                 | 16.09                   |
| LYZ         | X_11334                  | 0.57                   | 13.59               | 0.25                    | 2.48                 | 16.07                   |
| PTGDS       | urea                     | 0.51                   | 10.37               | 0.40                    | 5.70                 | 16.06                   |
| CFD         | four_acetamidobutanoate  | 0.39                   | 6.01                | 0.53                    | 10.05                | 16.06                   |
| CES1        | methionine               | 0.37                   | 5.43                | 0.54                    | 10.60                | 16.03                   |
| APOA2       | X_06346                  | 0.42                   | 7.08                | 0.50                    | 8.95                 | 16.03                   |
| APOD        | X_10744                  | 0.48                   | 9.15                | 0.44                    | 6.88                 | 16.03                   |
| LYZ         | X_10395                  | 0.38                   | 5.69                | 0.53                    | 10.32                | 16.02                   |
| RBP4        | xylonate                 | 0.35                   | 5.08                | 0.55                    | 10.93                | 16.01                   |
| CFD         | threitol                 | 0.41                   | 6.82                | 0.51                    | 9.18                 | 16.00                   |
| CFD         | N2_N2_dimethylguanosine  | 0.40                   | 6.41                | 0.52                    | 9.51                 | 15.92                   |
| CST3        | X_12092                  | 0.43                   | 7.42                | 0.49                    | 8.49                 | 15.91                   |
| PTGDS       | one_five_anhydroglucitol | -0.50                  | 10.07               | -0.41                   | 5.83                 | 15.90                   |
| LYZ         | X_04507                  | 0.59                   | 14.74               | 0.16                    | 1.15                 | 15.90                   |
| LCN2        | SDMA                     | 0.41                   | 6.62                | 0.51                    | 9.27                 | 15.89                   |
| CFD         | three_indoxyl_sulfate    | 0.45                   | 7.94                | 0.47                    | 7.93                 | 15.87                   |
| SERPIND1    | HPLA                     | -0.48                  | 9.14                | -0.44                   | 6.69                 | 15.84                   |
| AFM         | X_11786                  | 0.44                   | 7.79                | 0.48                    | 8.04                 | 15.83                   |
| RBP4        | X_04507                  | 0.35                   | 5.05                | 0.55                    | 10.78                | 15.83                   |
| FCGBP       | hexanoylcarnitine        | 0.46                   | 8.53                | 0.45                    | 7.30                 | 15.83                   |
| SAA1        | X_12794                  | 0.47                   | 8.98                | 0.44                    | 6.85                 | 15.83                   |
| APOA2       | X_05907                  | 0.44                   | 7.80                | 0.48                    | 8.01                 | 15.81                   |
| B2M         | carnitine                | -0.42                  | 6.92                | -0.50                   | 8.87                 | 15.79                   |
| LYZ         | threitol                 | 0.56                   | 13.03               | 0.27                    | 2.75                 | 15.78                   |
| B2M         | p_cresol_sulfate         | 0.48                   | 9.13                | 0.43                    | 6.64                 | 15.77                   |
| PTGDS       | X_11437                  | 0.48                   | 9.49                | 0.42                    | 6.28                 | 15.77                   |
| RNASE1      | cysteine                 | 0.38                   | 5.74                | 0.53                    | 10.01                | 15.75                   |
| APOC3       | one_palmitoylglycerol    | 0.55                   | 12.69               | 0.29                    | 3.06                 | 15.75                   |
| LCN2        | N_acetylthreonine        | 0.44                   | 7.80                | 0.47                    | 7.94                 | 15.74                   |
| AZGP1       | erythronate              | 0.47                   | 8.91                | 0.44                    | 6.81                 | 15.72                   |
| IGFBP4      | xylonate                 | 0.52                   | 11.22               | 0.35                    | 4.44                 | 15.66                   |
| REG1A       | pseudouridine            | 0.37                   | 5.38                | 0.53                    | 10.27                | 15.65                   |
| B2M         | tiglyl_carnitine         | 0.41                   | 6.84                | 0.50                    | 8.80                 | 15.64                   |
| CFD         | X_12405                  | 0.44                   | 7.78                | 0.47                    | 7.85                 | 15.63                   |
| RBP4        | gulono_1_4_lactone       | 0.33                   | 4.40                | 0.56                    | 11.23                | 15.63                   |
| LBP         | two_palmitoyl_GPC        | -0.48                  | 9.12                | -0.43                   | 6.47                 | 15.59                   |
| RBP4        | X_10395                  | 0.46                   | 8.54                | 0.45                    | 7.04                 | 15.58                   |
| RBP4        | X_12117                  | 0.32                   | 4.27                | 0.56                    | 11.30                | 15.57                   |
| B2M         | choline                  | 0.46                   | 8.32                | 0.45                    | 7.23                 | 15.55                   |
| AMBP        | X_03056                  | 0.45                   | 8.16                | 0.46                    | 7.38                 | 15.54                   |
| CFHR2       | xylonate                 | 0.49                   | 9.80                | 0.40                    | 5.73                 | 15.53                   |
| LCP1        | HPLA                     | 0.52                   | 11.21               | 0.35                    | 4.30                 | 15.51                   |
| ORM1        | X_12611                  | 0.46                   | 8.63                | 0.44                    | 6.87                 | 15.51                   |

| gene symbol | metabolite               | t0 Pearson Correlation | t0 NegLog10 p-value | t24 Pearson Correlation | t24 NegLog10 p-value | Sum of NegLog10 p-value |
|-------------|--------------------------|------------------------|---------------------|-------------------------|----------------------|-------------------------|
| CRP         | one_palmitoyl_GPC        | -0.49                  | 9.80                | -0.40                   | 5.66                 | 15.46                   |
| APOA2       | X_12038                  | 0.43                   | 7.50                | 0.47                    | 7.95                 | 15.46                   |
| CST3        | one_five_anhydroglucitol | -0.42                  | 7.19                | -0.48                   | 8.25                 | 15.44                   |
| CFD         | N_acetylalanine          | 0.33                   | 4.43                | 0.55                    | 11.01                | 15.44                   |
| REG1A       | X_11687                  | 0.41                   | 6.71                | 0.49                    | 8.72                 | 15.43                   |
| PTGDS       | N_acetylneuraminate      | 0.42                   | 6.91                | 0.49                    | 8.51                 | 15.43                   |
| CFD         | X_12117                  | 0.42                   | 6.95                | 0.49                    | 8.47                 | 15.42                   |
| APCS        | taurochenodeoxycholate   | -0.50                  | 10.21               | -0.38                   | 5.20                 | 15.41                   |
| CST3        | X_04495                  | 0.49                   | 9.51                | 0.41                    | 5.90                 | 15.41                   |
| REG1A       | X_13553                  | 0.40                   | 6.56                | 0.50                    | 8.83                 | 15.39                   |
| TF          | tryptophan               | 0.39                   | 6.02                | 0.51                    | 9.37                 | 15.39                   |
| IGFBP4      | erythritol               | 0.53                   | 11.54               | 0.33                    | 3.84                 | 15.39                   |
| AZGP1       | X_11334                  | 0.44                   | 7.77                | 0.46                    | 7.59                 | 15.36                   |
| APOD        | X_06346                  | 0.46                   | 8.61                | 0.44                    | 6.74                 | 15.35                   |
| APOC3       | X_10500                  | 0.46                   | 8.33                | 0.45                    | 7.02                 | 15.35                   |
| AMBP        | X_11850                  | 0.44                   | 7.61                | 0.47                    | 7.72                 | 15.33                   |
| AZGP1       | pyridoxate               | 0.44                   | 7.58                | 0.47                    | 7.73                 | 15.32                   |
| CFHR2       | X_04507                  | 0.47                   | 8.98                | 0.42                    | 6.32                 | 15.29                   |
| ORM1        | X_11429                  | 0.44                   | 7.79                | 0.46                    | 7.50                 | 15.29                   |
| VTN         | X_12688                  | -0.40                  | 6.52                | -0.50                   | 8.75                 | 15.26                   |
| APOD        | X_08402                  | 0.50                   | 10.11               | 0.38                    | 5.14                 | 15.25                   |
| C1QB        | X_10395                  | -0.54                  | 12.07               | -0.29                   | 3.18                 | 15.25                   |
| SERPIND1    | alpha_hydroxyisovalerate | -0.41                  | 6.88                | -0.48                   | 8.36                 | 15.24                   |
| VSIG4       | HPLA                     | 0.38                   | 5.79                | 0.51                    | 9.45                 | 15.24                   |
| CFHR2       | three_indoxyl_sulfate    | 0.47                   | 8.83                | 0.43                    | 6.40                 | 15.23                   |
| IGFBP4      | erythronate              | 0.54                   | 11.78               | 0.31                    | 3.45                 | 15.23                   |
| LGALS3BP    | X_14658                  | 0.45                   | 8.12                | 0.45                    | 7.09                 | 15.21                   |
| RNASE1      | pantothenate             | 0.44                   | 7.63                | 0.46                    | 7.57                 | 15.20                   |
| B2M         | glutamylvaline           | 0.47                   | 9.01                | 0.42                    | 6.12                 | 15.12                   |
| RBP4        | X_12217                  | 0.34                   | 4.64                | 0.54                    | 10.47                | 15.11                   |
| SAA1        | one_oleoyl_GPC           | -0.49                  | 9.66                | -0.39                   | 5.42                 | 15.08                   |
| SAA1        | one_linoleoyl_GPC        | -0.47                  | 9.05                | -0.41                   | 6.04                 | 15.08                   |
| RBP4        | catechol_sulfate         | 0.40                   | 6.29                | 0.50                    | 8.78                 | 15.07                   |
| ICAM2       | taurochenodeoxycholate   | 0.45                   | 8.18                | 0.44                    | 6.87                 | 15.06                   |
| PTGDS       | glutamylvaline           | 0.48                   | 9.20                | 0.41                    | 5.86                 | 15.05                   |
| PTGDS       | p_cresol_sulfate         | 0.39                   | 5.96                | 0.50                    | 9.08                 | 15.04                   |
| ORM1        | X_12104                  | 0.34                   | 4.69                | 0.54                    | 10.34                | 15.04                   |
| CES1        | tyrosine                 | 0.37                   | 5.54                | 0.51                    | 9.49                 | 15.03                   |
| CFHR2       | X_05522                  | 0.44                   | 7.66                | 0.46                    | 7.36                 | 15.02                   |
| TIMP1       | HPLA                     | 0.50                   | 10.03               | 0.37                    | 4.96                 | 14.99                   |
| AMBP        | indolelactate            | 0.52                   | 11.07               | 0.33                    | 3.92                 | 14.99                   |
| LYZ         | arabitol                 | 0.56                   | 13.19               | 0.21                    | 1.79                 | 14.98                   |
| APOC3       | X_10510                  | 0.47                   | 8.96                | 0.41                    | 6.01                 | 14.97                   |
| RBP4        | X_11826                  | 0.35                   | 4.96                | 0.53                    | 10.00                | 14.96                   |
| CFD         | pseudouridine            | 0.38                   | 5.85                | 0.50                    | 9.11                 | 14.96                   |
| CFHR2       | creatinine               | 0.47                   | 8.90                | 0.41                    | 6.06                 | 14.95                   |
| S100A8      | tiglyl_carnitine         | 0.47                   | 8.86                | 0.42                    | 6.08                 | 14.95                   |
| LYZ         | xylonate                 | 0.56                   | 13.17               | 0.21                    | 1.74                 | 14.91                   |
| CFHR2       | X_11334                  | 0.46                   | 8.50                | 0.43                    | 6.41                 | 14.90                   |
| CFD         | X_11429                  | 0.32                   | 4.19                | 0.54                    | 10.69                | 14.88                   |
| APOA4       | three_methylhistidine    | 0.48                   | 9.30                | 0.40                    | 5.57                 | 14.87                   |
| PRDX2       | heme                     | 0.30                   | 3.66                | 0.55                    | 11.20                | 14.86                   |
| ITIH1       | X_10395                  | 0.42                   | 7.10                | 0.47                    | 7.76                 | 14.86                   |
| LYZ         | X_11423                  | 0.56                   | 13.26               | 0.19                    | 1.59                 | 14.85                   |
| AZGP1       | erythritol               | 0.48                   | 9.10                | 0.40                    | 5.73                 | 14.84                   |
| PTGDS       | X_07765                  | 0.38                   | 5.68                | 0.51                    | 9.15                 | 14.84                   |

| gene symbol | metabolite                 | t0 Pearson Correlation | t0 NegLog10 p-value | t24 Pearson Correlation | t24 NegLog10 p-value | Sum of NegLog10 p-value |
|-------------|----------------------------|------------------------|---------------------|-------------------------|----------------------|-------------------------|
| S100A8      | X_12794                    | 0.49                   | 9.69                | 0.38                    | 5.14                 | 14.83                   |
| HRG         | X_10395                    | 0.48                   | 9.30                | 0.40                    | 5.53                 | 14.83                   |
| APOC3       | cholesterol                | 0.40                   | 6.30                | 0.49                    | 8.52                 | 14.82                   |
| RNASE1      | X_12844                    | 0.45                   | 8.20                | 0.43                    | 6.60                 | 14.79                   |
| CFHR2       | arabitol                   | 0.48                   | 9.22                | 0.40                    | 5.57                 | 14.79                   |
| APOC3       | X_03094                    | 0.50                   | 10.01               | 0.37                    | 4.77                 | 14.78                   |
| LCN2        | X_12802                    | 0.40                   | 6.49                | 0.48                    | 8.27                 | 14.77                   |
| SAA3P       | X_11440                    | 0.46                   | 8.33                | 0.43                    | 6.43                 | 14.76                   |
| CFD         | erythritol                 | 0.40                   | 6.26                | 0.49                    | 8.50                 | 14.76                   |
| LCN2        | X_13553                    | 0.42                   | 7.01                | 0.47                    | 7.71                 | 14.72                   |
| AFM         | X_03056                    | -0.50                  | 10.12               | -0.36                   | 4.56                 | 14.67                   |
| ORM2        | X_12104                    | 0.34                   | 4.75                | 0.53                    | 9.92                 | 14.67                   |
| LBP         | one_arachidoyl_GPC         | -0.43                  | 7.41                | -0.45                   | 7.26                 | 14.67                   |
| CST3        | X_04595                    | 0.41                   | 6.74                | 0.47                    | 7.91                 | 14.65                   |
| AHSG        | one_stearoyl_GPC           | 0.39                   | 6.12                | 0.49                    | 8.53                 | 14.65                   |
| AMBP        | X_13553                    | 0.45                   | 8.27                | 0.42                    | 6.38                 | 14.65                   |
| SAA1        | X_11440                    | 0.47                   | 8.72                | 0.41                    | 5.93                 | 14.65                   |
| ORM1        | X_12802                    | 0.45                   | 7.99                | 0.43                    | 6.65                 | 14.65                   |
| CFHR2       | erythronate                | 0.46                   | 8.66                | 0.41                    | 5.97                 | 14.64                   |
| SAA1        | two_palmitoyl_GPC          | -0.49                  | 9.68                | -0.37                   | 4.94                 | 14.62                   |
| VWF         | alpha_hydroxyisovalerate   | 0.38                   | 5.77                | 0.50                    | 8.85                 | 14.62                   |
| AMBP        | X_07765                    | 0.45                   | 8.26                | 0.42                    | 6.35                 | 14.61                   |
| B2M         | catechol_sulfate           | 0.50                   | 10.23               | 0.35                    | 4.36                 | 14.59                   |
| CFD         | X_12100                    | 0.41                   | 6.59                | 0.47                    | 7.99                 | 14.58                   |
| COL11A2     | piperine                   | 0.38                   | 5.88                | 0.49                    | 8.70                 | 14.58                   |
| SAA3P       | mannose                    | 0.43                   | 7.23                | 0.46                    | 7.34                 | 14.57                   |
| LCN2        | X_12695                    | 0.41                   | 6.60                | 0.47                    | 7.97                 | 14.57                   |
| CFD         | X_02249                    | 0.51                   | 10.39               | 0.34                    | 4.16                 | 14.56                   |
| ORM2        | X_12611                    | 0.46                   | 8.43                | 0.42                    | 6.12                 | 14.55                   |
| LCN2        | one_methylimidazoleacetate | 0.38                   | 5.71                | 0.50                    | 8.84                 | 14.55                   |
| CFD         | one_methylimidazoleacetate | 0.42                   | 7.04                | 0.46                    | 7.43                 | 14.47                   |
| LYZ         | erythronate                | 0.56                   | 13.07               | 0.18                    | 1.40                 | 14.47                   |
| IGFBP4      | pseudouridine              | 0.54                   | 11.83               | 0.26                    | 2.61                 | 14.44                   |
| RNASE1      | xylose                     | 0.36                   | 5.09                | 0.51                    | 9.34                 | 14.43                   |
| APCS        | glycochenodeoxycholate     | -0.47                  | 8.85                | -0.40                   | 5.58                 | 14.43                   |
| REG1A       | N_acetylanine              | 0.39                   | 5.99                | 0.49                    | 8.42                 | 14.41                   |
| PTGDS       | X_11444                    | 0.39                   | 6.05                | 0.48                    | 8.36                 | 14.41                   |
| B2M         | X_04595                    | 0.37                   | 5.62                | 0.50                    | 8.79                 | 14.40                   |
| AHSG        | X_10395                    | 0.50                   | 10.13               | 0.35                    | 4.28                 | 14.40                   |
| PTGDS       | choline                    | 0.43                   | 7.26                | 0.45                    | 7.14                 | 14.40                   |
| RNASE1      | X_12855                    | 0.44                   | 7.67                | 0.44                    | 6.73                 | 14.40                   |
| AZGP1       | three_indoxyl_sulfate      | 0.46                   | 8.36                | 0.41                    | 6.02                 | 14.38                   |
| ULK4        | taurocholate               | -0.55                  | 12.72               | -0.20                   | 1.65                 | 14.37                   |
| B2M         | X_11510                    | 0.37                   | 5.36                | 0.50                    | 9.00                 | 14.36                   |
| CFHR2       | X_12104                    | 0.43                   | 7.31                | 0.45                    | 7.06                 | 14.36                   |
| TIMP1       | one_stearoyl_GPC           | -0.33                  | 4.35                | -0.53                   | 10.01                | 14.35                   |
| VTN         | xylonate                   | -0.38                  | 5.76                | -0.49                   | 8.59                 | 14.34                   |
| AZGP1       | pseudouridine              | 0.45                   | 7.95                | 0.43                    | 6.39                 | 14.34                   |
| CFHR2       | erythritol                 | 0.46                   | 8.48                | 0.41                    | 5.85                 | 14.33                   |
| CFHR2       | X_12117                    | 0.43                   | 7.43                | 0.44                    | 6.90                 | 14.32                   |
| C1QC        | HPLA                       | 0.43                   | 7.37                | 0.44                    | 6.94                 | 14.32                   |
| APOC1       | X_10500                    | 0.39                   | 6.12                | 0.48                    | 8.16                 | 14.29                   |
| APOC1       | X_10510                    | 0.43                   | 7.37                | 0.44                    | 6.91                 | 14.28                   |
| CFHR2       | X_12405                    | 0.46                   | 8.64                | 0.40                    | 5.63                 | 14.27                   |
| IGFBP4      | X_11334                    | 0.49                   | 9.92                | 0.35                    | 4.35                 | 14.27                   |
| LCN2        | erythronate                | 0.42                   | 6.89                | 0.46                    | 7.36                 | 14.25                   |



| gene symbol | metabolite                      | t0 Pearson Correlation | t0 NegLog10 p-value | t24 Pearson Correlation | t24 NegLog10 p-value | Sum of NegLog10 p-value |
|-------------|---------------------------------|------------------------|---------------------|-------------------------|----------------------|-------------------------|
| CST3        | gamma_glutamylphenylalanine     | 0.49                   | 9.52                | 0.36                    | 4.72                 | 14.24                   |
| APOA1       | X_06346                         | 0.42                   | 7.02                | 0.45                    | 7.21                 | 14.23                   |
| HBB         | AMP                             | 0.33                   | 4.44                | 0.52                    | 9.79                 | 14.23                   |
| CST3        | pantothenate                    | 0.33                   | 4.46                | 0.52                    | 9.73                 | 14.20                   |
| DEFA1       | X_13553                         | 0.40                   | 6.29                | 0.47                    | 7.89                 | 14.17                   |
| LRG1        | one_palmitoyl_GPC               | -0.51                  | 10.77               | -0.30                   | 3.38                 | 14.15                   |
| LGALS3BP    | seven_HOCA                      | 0.37                   | 5.62                | 0.49                    | 8.52                 | 14.14                   |
| FN1         | mannose                         | -0.31                  | 3.92                | -0.53                   | 10.20                | 14.12                   |
| CFHR2       | N6_carbamoylthreonyladenosine   | 0.45                   | 8.12                | 0.41                    | 5.98                 | 14.10                   |
| IGFBP4      | X_11687                         | 0.49                   | 9.67                | 0.35                    | 4.42                 | 14.09                   |
| SAA3P       | one_oleoyl_GPC                  | -0.49                  | 9.56                | -0.36                   | 4.53                 | 14.09                   |
| ORM1        | X_03951                         | 0.42                   | 7.13                | 0.44                    | 6.94                 | 14.08                   |
| IGFBP4      | arabitol                        | 0.52                   | 11.21               | 0.28                    | 2.86                 | 14.07                   |
| REG1A       | N2_N2_dimethylguanosine         | 0.40                   | 6.30                | 0.47                    | 7.76                 | 14.06                   |
| LGALS3BP    | pipecolate                      | 0.42                   | 7.05                | 0.45                    | 7.01                 | 14.06                   |
| REG1A       | erythronate                     | 0.37                   | 5.46                | 0.49                    | 8.59                 | 14.05                   |
| APOB        | X_10510                         | 0.44                   | 7.59                | 0.43                    | 6.46                 | 14.05                   |
| HBA1        | AMP                             | 0.33                   | 4.49                | 0.52                    | 9.55                 | 14.04                   |
| CD14        | N_acetylalanine                 | 0.36                   | 5.26                | 0.50                    | 8.78                 | 14.04                   |
| SERPINA3    | one_stearoyl_GPC                | -0.45                  | 8.06                | -0.41                   | 5.98                 | 14.04                   |
| APOC2       | cholesterol                     | 0.38                   | 5.83                | 0.48                    | 8.19                 | 14.02                   |
| AZGP1       | gulono_1_4_lactone              | 0.45                   | 8.05                | 0.41                    | 5.96                 | 14.02                   |
| A1BG        | X_04495                         | -0.45                  | 8.15                | -0.41                   | 5.87                 | 14.01                   |
| LCN2        | phenylacetylglutamine           | 0.38                   | 5.94                | 0.48                    | 8.08                 | 14.01                   |
| AHSG        | X_03056                         | -0.44                  | 7.73                | -0.42                   | 6.28                 | 14.00                   |
| SAA3P       | one_linoleoyl_GPC               | -0.47                  | 8.92                | -0.38                   | 5.08                 | 14.00                   |
| PTGDS       | prolylhydroxyproline            | 0.47                   | 8.87                | 0.38                    | 5.12                 | 13.99                   |
| RBP4        | X_12405                         | 0.34                   | 4.61                | 0.51                    | 9.38                 | 13.99                   |
| GPX3        | X_02249                         | -0.42                  | 6.97                | -0.45                   | 7.01                 | 13.98                   |
| MB          | three_hydroxy_2_ethylpropionate | 0.36                   | 5.29                | 0.49                    | 8.69                 | 13.98                   |
| AZGP1       | threonate                       | 0.41                   | 6.83                | 0.45                    | 7.15                 | 13.97                   |
| RNASE1      | X_11850                         | 0.39                   | 6.17                | 0.47                    | 7.80                 | 13.97                   |
| GPX3        | biliverdin                      | 0.50                   | 9.95                | 0.33                    | 4.02                 | 13.97                   |
| LRG1        | one_stearoyl_GPC                | -0.48                  | 9.39                | -0.36                   | 4.58                 | 13.97                   |
| REG1A       | N6_carbamoylthreonyladenosine   | 0.36                   | 5.23                | 0.50                    | 8.74                 | 13.97                   |
| REG1A       | allantoin                       | 0.39                   | 6.24                | 0.47                    | 7.73                 | 13.97                   |
| VWF         | one_arachidoyl_GPE              | -0.43                  | 7.36                | -0.43                   | 6.60                 | 13.96                   |
| S100A8      | two_methylbutyroylcarnitine     | 0.48                   | 9.45                | 0.36                    | 4.50                 | 13.95                   |
| KLKB1       | X_10395                         | 0.58                   | 13.88               | 0.01                    | 0.06                 | 13.95                   |
| SAA1        | X_14626                         | 0.40                   | 6.53                | 0.46                    | 7.42                 | 13.94                   |
| CRP         | one_stearoyl_GPC                | -0.43                  | 7.54                | -0.43                   | 6.40                 | 13.94                   |
| PTGDS       | cysteine                        | 0.28                   | 3.24                | 0.54                    | 10.69                | 13.93                   |
| ORM2        | histidine                       | -0.44                  | 7.69                | -0.42                   | 6.21                 | 13.90                   |
| C1QB        | methionine                      | 0.44                   | 7.83                | 0.41                    | 6.06                 | 13.90                   |
| CST3        | indolelactate                   | 0.45                   | 8.22                | 0.40                    | 5.67                 | 13.90                   |
| RBP4        | hippurate                       | 0.36                   | 5.33                | 0.49                    | 8.56                 | 13.89                   |
| CST3        | X_11261                         | 0.43                   | 7.38                | 0.43                    | 6.51                 | 13.88                   |
| LUM         | allantoin                       | 0.44                   | 7.73                | 0.42                    | 6.15                 | 13.88                   |
| LCN2        | one_stearoyl_GPC                | -0.22                  | 2.17                | -0.57                   | 11.70                | 13.87                   |
| B2M         | cysteine                        | 0.39                   | 6.05                | 0.47                    | 7.80                 | 13.85                   |
| SAA1        | X_11445                         | 0.45                   | 8.11                | 0.40                    | 5.73                 | 13.84                   |
| VTN         | threitol                        | -0.39                  | 5.98                | -0.47                   | 7.86                 | 13.84                   |
| PTGDS       | phosphate                       | 0.34                   | 4.73                | 0.50                    | 9.11                 | 13.83                   |
| LCN2        | X_12100                         | 0.43                   | 7.42                | 0.43                    | 6.40                 | 13.82                   |
| CFD         | X_12695                         | 0.43                   | 7.25                | 0.43                    | 6.58                 | 13.82                   |
| VASN        | N2_N2_dimethylguanosine         | 0.42                   | 7.21                | 0.43                    | 6.62                 | 13.82                   |

| gene symbol | metabolite                     | t0 Pearson Correlation | t0 NegLog10 p-value | t24 Pearson Correlation | t24 NegLog10 p-value | Sum of NegLog10 p-value |
|-------------|--------------------------------|------------------------|---------------------|-------------------------|----------------------|-------------------------|
| IGFBP4      | X_03951                        | 0.53                   | 11.74               | 0.23                    | 2.09                 | 13.82                   |
| PTGDS       | X_11850                        | 0.37                   | 5.61                | 0.48                    | 8.20                 | 13.81                   |
| APOA4       | catechol_sulfate               | 0.46                   | 8.36                | 0.39                    | 5.45                 | 13.81                   |
| RNASE1      | choline                        | 0.41                   | 6.78                | 0.45                    | 7.02                 | 13.80                   |
| VASN        | pseudouridine                  | 0.45                   | 7.94                | 0.41                    | 5.85                 | 13.79                   |
| AZGP1       | X_12206                        | 0.42                   | 7.11                | 0.43                    | 6.67                 | 13.77                   |
| CRP         | one_palmitoleoyl_GPC           | -0.45                  | 8.14                | -0.40                   | 5.62                 | 13.76                   |
| LYZ         | three_indoxyl_sulfate          | 0.55                   | 12.26               | 0.19                    | 1.50                 | 13.76                   |
| IGFBP4      | phenylacetylglutamine          | 0.51                   | 10.59               | 0.29                    | 3.16                 | 13.75                   |
| ULK4        | X_14658                        | -0.53                  | 11.62               | -0.23                   | 2.12                 | 13.74                   |
| APOC2       | X_08402                        | 0.45                   | 8.05                | 0.40                    | 5.68                 | 13.74                   |
| IGFBP4      | threitol                       | 0.50                   | 10.35               | 0.30                    | 3.36                 | 13.71                   |
| CST3        | sucrose                        | 0.38                   | 5.87                | 0.47                    | 7.82                 | 13.70                   |
| ICAM2       | glycochenodeoxycholate         | 0.42                   | 7.05                | 0.43                    | 6.64                 | 13.69                   |
| PTGDS       | X_12844                        | 0.36                   | 5.25                | 0.49                    | 8.44                 | 13.69                   |
| LCN2        | X_11429                        | 0.43                   | 7.39                | 0.42                    | 6.27                 | 13.66                   |
| REG1A       | X_11334                        | 0.32                   | 4.22                | 0.51                    | 9.42                 | 13.65                   |
| HPX         | glycochenodeoxycholate         | -0.44                  | 7.89                | -0.40                   | 5.76                 | 13.64                   |
| IGFBP4      | X_11423                        | 0.52                   | 10.97               | 0.27                    | 2.66                 | 13.63                   |
| LYZ         | X_12742                        | 0.53                   | 11.70               | 0.22                    | 1.92                 | 13.62                   |
| CFHR2       | X_12611                        | 0.45                   | 8.18                | 0.39                    | 5.43                 | 13.61                   |
| CES1        | HPLA                           | 0.27                   | 2.99                | 0.54                    | 10.61                | 13.61                   |
| CFD         | X_12688                        | 0.41                   | 6.64                | 0.44                    | 6.96                 | 13.60                   |
| AZGP1       | glutaryl carnitine             | 0.43                   | 7.27                | 0.42                    | 6.32                 | 13.59                   |
| CFHR2       | pyridoxate                     | 0.38                   | 5.78                | 0.47                    | 7.80                 | 13.58                   |
| LYZ         | threonate                      | 0.52                   | 10.92               | 0.26                    | 2.65                 | 13.57                   |
| AHSG        | creatine                       | -0.46                  | 8.58                | -0.37                   | 4.98                 | 13.57                   |
| TIMP1       | one_linoleoyl_GPC              | -0.31                  | 3.87                | -0.52                   | 9.69                 | 13.56                   |
| CRP         | one_linoleoyl_GPC              | -0.41                  | 6.80                | -0.44                   | 6.75                 | 13.55                   |
| LBP         | X_11445                        | 0.41                   | 6.75                | 0.44                    | 6.80                 | 13.54                   |
| GPX3        | seven_HOCA                     | 0.45                   | 8.23                | 0.39                    | 5.30                 | 13.53                   |
| ORM1        | X_04499                        | 0.42                   | 7.10                | 0.43                    | 6.42                 | 13.52                   |
| B2M         | four_acetaminophen_sulfate     | 0.32                   | 4.25                | 0.51                    | 9.26                 | 13.51                   |
| APOA4       | citrulline                     | 0.40                   | 6.34                | 0.45                    | 7.16                 | 13.50                   |
| LYZ         | X_12117                        | 0.53                   | 11.57               | 0.22                    | 1.92                 | 13.49                   |
| TIMP1       | one_arachidoyl_GPC             | -0.33                  | 4.53                | -0.50                   | 8.96                 | 13.49                   |
| LYZ         | X_12405                        | 0.55                   | 12.37               | 0.16                    | 1.12                 | 13.49                   |
| APOC1       | cholesterol                    | 0.36                   | 5.13                | 0.48                    | 8.36                 | 13.49                   |
| VTN         | X_03951                        | -0.39                  | 6.14                | -0.46                   | 7.34                 | 13.48                   |
| LGALS3BP    | HPLA                           | 0.46                   | 8.60                | 0.37                    | 4.88                 | 13.48                   |
| LBP         | X_11440                        | 0.40                   | 6.41                | 0.45                    | 7.07                 | 13.48                   |
| SERPINA3    | one_palmitoyl_GPC              | -0.47                  | 9.06                | -0.35                   | 4.40                 | 13.46                   |
| CST3        | threonate                      | 0.37                   | 5.40                | 0.48                    | 8.05                 | 13.45                   |
| RNASE1      | isobutyryl carnitine           | 0.34                   | 4.79                | 0.49                    | 8.66                 | 13.45                   |
| VWF         | one_arachidoyl_GPC             | -0.37                  | 5.54                | -0.47                   | 7.91                 | 13.45                   |
| C7          | X_12850                        | 0.40                   | 6.55                | 0.44                    | 6.89                 | 13.45                   |
| REG1A       | four_acetamidobutanoate        | 0.38                   | 5.66                | 0.47                    | 7.78                 | 13.45                   |
| AZGP1       | N6_carbamoylthreonyl adenosine | 0.42                   | 7.01                | 0.43                    | 6.43                 | 13.44                   |
| APOC1       | X_12038                        | 0.37                   | 5.45                | 0.47                    | 7.99                 | 13.44                   |
| IGFBP4      | one_methylimidazoleacetate     | 0.51                   | 10.52               | 0.28                    | 2.91                 | 13.43                   |
| RBP4        | arabitol                       | 0.34                   | 4.72                | 0.49                    | 8.71                 | 13.43                   |
| ORM1        | N_acetylaniline                | 0.39                   | 6.18                | 0.45                    | 7.24                 | 13.43                   |
| GPX3        | taurochenodeoxycholate         | 0.44                   | 7.88                | 0.40                    | 5.53                 | 13.41                   |
| IGFBP4      | X_04507                        | 0.51                   | 10.59               | 0.27                    | 2.81                 | 13.41                   |
| LCN2        | pseudouridine                  | 0.42                   | 7.19                | 0.42                    | 6.21                 | 13.41                   |
| VWF         | taurochenodeoxycholate         | 0.39                   | 6.13                | 0.45                    | 7.27                 | 13.40                   |

| gene symbol | metabolite                       | t0 Pearson Correlation | t0 NegLog10 p-value | t24 Pearson Correlation | t24 NegLog10 p-value | Sum of NegLog10 p-value |
|-------------|----------------------------------|------------------------|---------------------|-------------------------|----------------------|-------------------------|
| ORM2        | X_11429                          | 0.43                   | 7.38                | 0.41                    | 6.02                 | 13.40                   |
| DEFA1       | X_12794                          | 0.17                   | 1.40                | 0.57                    | 11.97                | 13.37                   |
| CFHR2       | pseudouridine                    | 0.46                   | 8.47                | 0.37                    | 4.89                 | 13.36                   |
| LYZ         | N6_carbamoylthreonyladenosine    | 0.54                   | 12.23               | 0.16                    | 1.12                 | 13.36                   |
| GPX3        | three_indoxyl_sulfate            | -0.43                  | 7.45                | -0.41                   | 5.89                 | 13.34                   |
| AZGP1       | X_11593                          | 0.42                   | 7.05                | 0.42                    | 6.28                 | 13.34                   |
| ORM2        | tryptophan                       | -0.36                  | 5.35                | -0.47                   | 7.99                 | 13.34                   |
| CFD         | X_12217                          | 0.40                   | 6.37                | 0.44                    | 6.96                 | 13.33                   |
| AZGP1       | X_11687                          | 0.42                   | 7.01                | 0.42                    | 6.31                 | 13.32                   |
| APOD        | X_10500                          | 0.43                   | 7.42                | 0.41                    | 5.89                 | 13.31                   |
| VTN         | pseudouridine                    | -0.40                  | 6.28                | -0.45                   | 7.03                 | 13.31                   |
| LBP         | X_12794                          | 0.42                   | 6.90                | 0.43                    | 6.41                 | 13.31                   |
| LYZ         | four_acetamidobutanoate          | 0.53                   | 11.74               | 0.19                    | 1.55                 | 13.29                   |
| ORM1        | histidine                        | -0.41                  | 6.83                | -0.43                   | 6.46                 | 13.29                   |
| VTN         | SDMA                             | -0.39                  | 6.02                | -0.45                   | 7.26                 | 13.29                   |
| LYZ         | allantoin                        | 0.54                   | 12.10               | 0.16                    | 1.18                 | 13.28                   |
| TIMP1       | X_10395                          | -0.32                  | 4.10                | -0.51                   | 9.17                 | 13.27                   |
| CFHR2       | X_05426                          | 0.48                   | 9.41                | 0.33                    | 3.85                 | 13.25                   |
| REG1A       | X_10483                          | 0.37                   | 5.55                | 0.47                    | 7.71                 | 13.25                   |
| IGFBP4      | N6_carbamoylthreonyladenosine    | 0.50                   | 9.94                | 0.30                    | 3.31                 | 13.25                   |
| SERPINA3    | one_palmitoleoyl_GPC             | -0.47                  | 8.97                | -0.35                   | 4.27                 | 13.24                   |
| LRG1        | one_oleoyl_GPC                   | -0.48                  | 9.45                | -0.32                   | 3.78                 | 13.23                   |
| LYZ         | hippurate                        | 0.54                   | 11.77               | 0.18                    | 1.46                 | 13.23                   |
| VWF         | gamma_glutamyltyrosine           | 0.50                   | 10.01               | 0.30                    | 3.21                 | 13.22                   |
| C1QB        | taurochenodeoxycholate           | 0.48                   | 9.14                | 0.34                    | 4.06                 | 13.20                   |
| GPX3        | X_12104                          | -0.42                  | 6.97                | -0.42                   | 6.23                 | 13.20                   |
| APCS        | betaine                          | -0.48                  | 9.35                | -0.33                   | 3.85                 | 13.20                   |
| SAA3P       | two_palmitoyl_GPC                | -0.48                  | 9.24                | -0.33                   | 3.94                 | 13.18                   |
| CST3        | phenol_sulfate                   | 0.39                   | 6.20                | 0.44                    | 6.97                 | 13.17                   |
| AMBP        | three_cystein_S_yl_acetaminophen | 0.27                   | 3.06                | 0.53                    | 10.10                | 13.16                   |
| B2M         | X_11850                          | 0.38                   | 5.74                | 0.46                    | 7.41                 | 13.15                   |
| B2M         | deoxycarnitine                   | 0.46                   | 8.31                | 0.37                    | 4.84                 | 13.15                   |
| RNASE1      | four_vinylphenol_sulfate         | 0.34                   | 4.69                | 0.49                    | 8.46                 | 13.15                   |
| VWF         | one_palmitoyl_GPC                | -0.41                  | 6.63                | -0.43                   | 6.51                 | 13.14                   |
| CST3        | choline                          | 0.37                   | 5.42                | 0.47                    | 7.72                 | 13.14                   |
| CFD         | X_11826                          | 0.39                   | 6.13                | 0.45                    | 7.00                 | 13.13                   |
| S100A8      | X_04499                          | 0.50                   | 9.95                | 0.29                    | 3.18                 | 13.13                   |
| ORM2        | threonine                        | -0.41                  | 6.78                | -0.42                   | 6.34                 | 13.12                   |
| RNASE1      | X_04595                          | 0.33                   | 4.47                | 0.49                    | 8.64                 | 13.11                   |
| PTGDS       | xylose                           | 0.32                   | 4.21                | 0.50                    | 8.89                 | 13.10                   |
| PTGDS       | X_04495                          | 0.47                   | 8.82                | 0.35                    | 4.28                 | 13.09                   |
| SAA1        | glutamine                        | -0.42                  | 6.96                | -0.42                   | 6.13                 | 13.09                   |
| SAA1        | three_cystein_S_yl_acetaminophen | 0.31                   | 4.01                | 0.50                    | 9.06                 | 13.07                   |
| AFM         | X_12510                          | 0.45                   | 7.95                | 0.38                    | 5.11                 | 13.07                   |
| DEFA1       | N_acetylaniline                  | 0.27                   | 3.11                | 0.53                    | 9.95                 | 13.07                   |
| SPINK1      | X_12794                          | 0.38                   | 5.74                | 0.46                    | 7.33                 | 13.06                   |
| C7          | HPLA                             | 0.49                   | 9.71                | 0.30                    | 3.33                 | 13.05                   |
| RNASE1      | deoxycarnitine                   | 0.41                   | 6.77                | 0.42                    | 6.24                 | 13.02                   |
| ORM2        | X_03951                          | 0.40                   | 6.39                | 0.43                    | 6.63                 | 13.01                   |
| HBZ         | AMP                              | 0.16                   | 1.34                | 0.56                    | 11.67                | 13.01                   |
| SAA4        | X_06346                          | 0.44                   | 7.72                | 0.39                    | 5.28                 | 13.00                   |
| REG1A       | xylonate                         | 0.34                   | 4.70                | 0.48                    | 8.29                 | 12.99                   |
| ORM1        | pseudouridine                    | 0.42                   | 7.11                | 0.41                    | 5.86                 | 12.97                   |
| SERPINC1    | X_10395                          | 0.48                   | 9.38                | 0.31                    | 3.59                 | 12.97                   |
| AMBP        | X_11838                          | 0.29                   | 3.53                | 0.51                    | 9.43                 | 12.96                   |
| ULK4        | HPLA                             | -0.47                  | 8.92                | -0.33                   | 4.04                 | 12.96                   |

| gene symbol | metabolite                       | t0 Pearson Correlation | t0 NegLog10 p-value | t24 Pearson Correlation | t24 NegLog10 p-value | Sum of NegLog10 p-value |
|-------------|----------------------------------|------------------------|---------------------|-------------------------|----------------------|-------------------------|
| REG1A       | erythritol                       | 0.35                   | 4.93                | 0.48                    | 8.03                 | 12.95                   |
| S100A9      | hexanoylcarnitine                | 0.42                   | 6.96                | 0.41                    | 5.98                 | 12.95                   |
| CFD         | X_12749                          | 0.39                   | 6.07                | 0.44                    | 6.87                 | 12.94                   |
| SAA1        | X_11245                          | 0.46                   | 8.41                | 0.36                    | 4.52                 | 12.93                   |
| CFHR2       | X_12099                          | 0.46                   | 8.35                | 0.36                    | 4.57                 | 12.93                   |
| ORM2        | tyrosine                         | -0.42                  | 7.03                | -0.41                   | 5.87                 | 12.90                   |
| S100A9      | one_palmitoyl_GPC                | -0.29                  | 3.47                | -0.51                   | 9.43                 | 12.90                   |
| B2M         | X_11444                          | 0.42                   | 7.15                | 0.40                    | 5.74                 | 12.88                   |
| REG1A       | phenylacetylglutamine            | 0.33                   | 4.34                | 0.49                    | 8.54                 | 12.88                   |
| B2M         | p_acetamidophenylglucuronide     | 0.33                   | 4.33                | 0.49                    | 8.55                 | 12.88                   |
| CFD         | pyridoxate                       | 0.41                   | 6.77                | 0.42                    | 6.11                 | 12.88                   |
| CFHR2       | X_11315                          | -0.42                  | 6.92                | -0.41                   | 5.96                 | 12.87                   |
| PLG         | X_13553                          | -0.17                  | 1.40                | -0.56                   | 11.44                | 12.84                   |
| ECM1        | seven_HOCA                       | 0.38                   | 5.76                | 0.45                    | 7.08                 | 12.84                   |
| AHSG        | X_11786                          | 0.38                   | 5.86                | 0.44                    | 6.97                 | 12.84                   |
| ORM2        | N6_carbamoylthreonyladenosine    | 0.36                   | 5.27                | 0.46                    | 7.56                 | 12.84                   |
| APOC3       | X_10744                          | 0.41                   | 6.62                | 0.42                    | 6.21                 | 12.83                   |
| RNASE1      | gamma_glutamylphenylalanine      | 0.35                   | 4.97                | 0.47                    | 7.85                 | 12.82                   |
| CFD         | X_05426                          | 0.45                   | 8.26                | 0.36                    | 4.56                 | 12.82                   |
| RBP4        | X_12695                          | 0.34                   | 4.57                | 0.48                    | 8.23                 | 12.80                   |
| CFD         | X_10483                          | 0.31                   | 3.88                | 0.50                    | 8.91                 | 12.80                   |
| IGFBP4      | N2_N2_dimethylguanosine          | 0.49                   | 9.86                | 0.28                    | 2.93                 | 12.80                   |
| RNASE1      | carnitine                        | -0.38                  | 5.66                | -0.45                   | 7.13                 | 12.79                   |
| TTR         | X_05907                          | 0.38                   | 5.78                | 0.45                    | 7.00                 | 12.79                   |
| CFD         | glutaroylcarnitine               | 0.36                   | 5.20                | 0.46                    | 7.58                 | 12.79                   |
| SAA3P       | three_cystein_S_yl_acetaminophen | 0.31                   | 3.96                | 0.50                    | 8.82                 | 12.78                   |
| CFHR2       | X_11826                          | 0.42                   | 7.15                | 0.40                    | 5.64                 | 12.78                   |
| LYZ         | X_03951                          | 0.53                   | 11.42               | 0.18                    | 1.35                 | 12.77                   |
| AZGP1       | creatinine                       | 0.42                   | 7.21                | 0.40                    | 5.56                 | 12.77                   |
| CST3        | quinate                          | 0.40                   | 6.40                | 0.42                    | 6.35                 | 12.76                   |
| CST3        | X_11315                          | -0.35                  | 4.90                | -0.47                   | 7.85                 | 12.75                   |
| FCGBP       | X_12794                          | 0.28                   | 3.29                | 0.51                    | 9.46                 | 12.75                   |
| LBP         | one_oleoyl_GPE                   | -0.36                  | 5.26                | -0.46                   | 7.48                 | 12.74                   |
| LCN2        | X_12860                          | 0.33                   | 4.31                | 0.49                    | 8.43                 | 12.74                   |
| AZGP1       | X_11429                          | 0.38                   | 5.72                | 0.45                    | 7.02                 | 12.74                   |
| DEFA1       | one_palmitoyl_GPC                | -0.19                  | 1.66                | -0.55                   | 11.07                | 12.73                   |
| IGFBP4      | X_04499                          | 0.52                   | 11.23               | 0.19                    | 1.49                 | 12.72                   |
| S100A9      | two_methylbutyroylcarnitine      | 0.45                   | 8.28                | 0.35                    | 4.43                 | 12.72                   |
| AZGP1       | four_acetamidobutanoate          | 0.42                   | 7.04                | 0.40                    | 5.67                 | 12.72                   |
| AZGP1       | X_12611                          | 0.43                   | 7.56                | 0.38                    | 5.15                 | 12.71                   |
| CRP         | one_oleoyl_GPC                   | -0.39                  | 6.20                | -0.43                   | 6.51                 | 12.71                   |
| FN1         | seven_HOCA                       | 0.19                   | 1.69                | 0.55                    | 11.01                | 12.70                   |
| ECM1        | pipecolate                       | 0.42                   | 7.01                | 0.40                    | 5.68                 | 12.69                   |
| PLG         | X_11421                          | -0.29                  | 3.51                | -0.51                   | 9.18                 | 12.69                   |
| AHSG        | mannose                          | -0.33                  | 4.49                | -0.48                   | 8.19                 | 12.68                   |
| IGFBP4      | X_10359                          | 0.49                   | 9.64                | 0.29                    | 3.03                 | 12.68                   |
| LUM         | malate                           | 0.35                   | 5.03                | 0.46                    | 7.63                 | 12.67                   |
| CFD         | X_12860                          | 0.41                   | 6.74                | 0.41                    | 5.92                 | 12.66                   |
| VWF         | methionine                       | 0.45                   | 8.22                | 0.35                    | 4.44                 | 12.66                   |
| PTGDS       | X_08889                          | 0.24                   | 2.43                | 0.53                    | 10.23                | 12.66                   |
| CFD         | SDMA                             | 0.33                   | 4.51                | 0.48                    | 8.15                 | 12.66                   |
| IGFBP4      | three_indoxyl_sulfate            | 0.47                   | 8.81                | 0.33                    | 3.84                 | 12.65                   |
| B2M         | X_12855                          | 0.44                   | 7.92                | 0.36                    | 4.72                 | 12.65                   |
| AZGP1       | X_11826                          | 0.41                   | 6.75                | 0.41                    | 5.89                 | 12.64                   |
| APOD        | X_12038                          | 0.43                   | 7.55                | 0.38                    | 5.09                 | 12.64                   |
| REG1A       | X_12688                          | 0.29                   | 3.47                | 0.51                    | 9.17                 | 12.63                   |

| gene symbol | metabolite                       | t0 Pearson Correlation | t0 NegLog10 p-value | t24 Pearson Correlation | t24 NegLog10 p-value | Sum of NegLog10 p-value |
|-------------|----------------------------------|------------------------|---------------------|-------------------------|----------------------|-------------------------|
| VASN        | four_acetamidobutanoate          | 0.41                   | 6.60                | 0.41                    | 6.04                 | 12.63                   |
| CFD         | phenol_sulfate                   | 0.39                   | 6.10                | 0.43                    | 6.53                 | 12.62                   |
| SPINK1      | N2_N2_dimethylguanosine          | 0.44                   | 7.90                | 0.36                    | 4.72                 | 12.61                   |
| AZGP1       | X_11444                          | 0.41                   | 6.73                | 0.41                    | 5.88                 | 12.60                   |
| ICAM2       | tyrosine                         | 0.44                   | 7.66                | 0.37                    | 4.95                 | 12.60                   |
| SAA3P       | X_11445                          | 0.43                   | 7.46                | 0.38                    | 5.14                 | 12.60                   |
| HPX         | X_12850                          | -0.42                  | 7.08                | -0.39                   | 5.51                 | 12.59                   |
| AZGP1       | X_12092                          | 0.41                   | 6.70                | 0.41                    | 5.90                 | 12.59                   |
| FCGBP       | X_11421                          | 0.40                   | 6.25                | 0.42                    | 6.33                 | 12.58                   |
| ECM1        | glycochenodeoxycholate           | 0.36                   | 5.09                | 0.46                    | 7.48                 | 12.58                   |
| PON1        | X_04499                          | -0.42                  | 7.20                | -0.39                   | 5.36                 | 12.56                   |
| COL11A2     | X_10395                          | 0.48                   | 9.10                | 0.31                    | 3.46                 | 12.56                   |
| AMBP        | four_acetaminophen_sulfate       | 0.33                   | 4.41                | 0.48                    | 8.14                 | 12.55                   |
| LYZ         | gulono_1_4_lactone               | 0.52                   | 11.04               | 0.19                    | 1.50                 | 12.54                   |
| GPX3        | X_12405                          | -0.41                  | 6.71                | -0.41                   | 5.83                 | 12.54                   |
| SERPINA3    | one_linoleoyl_GPC                | -0.38                  | 5.91                | -0.43                   | 6.63                 | 12.54                   |
| LYZ         | X_12695                          | 0.51                   | 10.76               | 0.21                    | 1.77                 | 12.53                   |
| IGFBP4      | creatinine                       | 0.43                   | 7.42                | 0.38                    | 5.11                 | 12.53                   |
| GPX3        | X_03951                          | -0.42                  | 6.94                | -0.40                   | 5.59                 | 12.53                   |
| B2M         | three_cystein_S_yl_acetaminophen | 0.27                   | 3.06                | 0.51                    | 9.47                 | 12.53                   |
| IGFBP4      | X_12749                          | 0.51                   | 10.47               | 0.23                    | 2.05                 | 12.52                   |
| ORM1        | N6_carbamoylthreonyladenosine    | 0.37                   | 5.51                | 0.45                    | 7.01                 | 12.51                   |
| B2M         | X_08889                          | 0.30                   | 3.62                | 0.50                    | 8.89                 | 12.51                   |
| IGFBP4      | N_acetylalanine                  | 0.49                   | 9.83                | 0.27                    | 2.68                 | 12.51                   |
| REG1A       | SDMA                             | 0.30                   | 3.80                | 0.49                    | 8.71                 | 12.51                   |
| CST3        | X_11421                          | 0.44                   | 7.78                | 0.36                    | 4.73                 | 12.51                   |
| IGFBP4      | allantoin                        | 0.47                   | 9.00                | 0.31                    | 3.51                 | 12.51                   |
| LCN2        | X_12688                          | 0.35                   | 4.93                | 0.46                    | 7.57                 | 12.50                   |
| LCN2        | one_arachidoyl_GPC               | -0.29                  | 3.41                | -0.50                   | 9.09                 | 12.50                   |
| SERPINA1    | X_10395                          | -0.43                  | 7.27                | -0.38                   | 5.23                 | 12.50                   |
| LCN2        | X_04507                          | 0.42                   | 7.10                | 0.39                    | 5.38                 | 12.48                   |
| CFD         | X_10266                          | 0.46                   | 8.42                | 0.34                    | 4.05                 | 12.48                   |
| LBP         | three_cystein_S_yl_acetaminophen | 0.35                   | 4.85                | 0.46                    | 7.62                 | 12.47                   |
| REG1A       | X_12695                          | 0.35                   | 5.07                | 0.46                    | 7.39                 | 12.46                   |
| MB          | X_12855                          | 0.46                   | 8.36                | 0.34                    | 4.09                 | 12.45                   |
| PTGDS       | three_cystein_S_yl_acetaminophen | 0.24                   | 2.55                | 0.52                    | 9.90                 | 12.44                   |
| F12         | androsterone_sulfate             | -0.44                  | 7.72                | -0.36                   | 4.71                 | 12.43                   |
| TIMP1       | one_oleoyl_GPC                   | -0.28                  | 3.23                | -0.51                   | 9.20                 | 12.43                   |
| FCGBP       | X_13553                          | 0.44                   | 7.78                | 0.36                    | 4.65                 | 12.43                   |
| APOC1       | X_10395                          | 0.44                   | 7.84                | 0.36                    | 4.59                 | 12.42                   |
| VTN         | X_10359                          | -0.35                  | 4.95                | -0.46                   | 7.47                 | 12.42                   |
| AZGP1       | X_12405                          | 0.41                   | 6.70                | 0.40                    | 5.71                 | 12.41                   |
| CFHR2       | X_11261                          | 0.43                   | 7.40                | 0.38                    | 4.99                 | 12.39                   |
| APOL1       | X_10395                          | 0.51                   | 10.49               | 0.22                    | 1.88                 | 12.37                   |
| AMBP        | cysteine                         | 0.32                   | 4.13                | 0.48                    | 8.24                 | 12.36                   |
| CFHR2       | one_five_anhydroglucitol         | -0.39                  | 6.11                | -0.42                   | 6.25                 | 12.36                   |
| LYZ         | N2_N2_dimethylguanosine          | 0.52                   | 10.92               | 0.18                    | 1.43                 | 12.35                   |
| RNASE1      | X_08889                          | 0.28                   | 3.26                | 0.50                    | 9.08                 | 12.34                   |
| LYZ         | pseudouridine                    | 0.51                   | 10.73               | 0.20                    | 1.61                 | 12.34                   |
| AZGP1       | X_02249                          | 0.44                   | 7.70                | 0.36                    | 4.64                 | 12.34                   |
| LRG1        | two_palmitoyl_GPC                | -0.47                  | 8.86                | -0.31                   | 3.47                 | 12.33                   |
| PLG         | N_acetylalanine                  | -0.19                  | 1.73                | -0.54                   | 10.60                | 12.33                   |
| LCN2        | X_12405                          | 0.37                   | 5.45                | 0.44                    | 6.85                 | 12.30                   |
| CES1        | gamma_glutamyltyrosine           | 0.30                   | 3.71                | 0.49                    | 8.58                 | 12.29                   |
| ECM1        | taurochenodeoxycholate           | 0.34                   | 4.78                | 0.46                    | 7.50                 | 12.28                   |
| SAA3P       | X_14626                          | 0.39                   | 6.16                | 0.42                    | 6.11                 | 12.27                   |

| gene symbol | metabolite                  | t0 Pearson Correlation | t0 NegLog10 p-value | t24 Pearson Correlation | t24 NegLog10 p-value | Sum of NegLog10 p-value |
|-------------|-----------------------------|------------------------|---------------------|-------------------------|----------------------|-------------------------|
| ORM1        | threonine                   | -0.39                  | 6.11                | -0.42                   | 6.15                 | 12.26                   |
| DEFA1       | one_stearoyl_GPC            | -0.15                  | 1.14                | -0.55                   | 11.12                | 12.26                   |
| VTN         | arabitol                    | -0.36                  | 5.15                | -0.45                   | 7.11                 | 12.26                   |
| REG1A       | X_03951                     | 0.31                   | 3.92                | 0.48                    | 8.34                 | 12.26                   |
| HPR         | seven_HOCA                  | -0.36                  | 5.20                | -0.45                   | 7.06                 | 12.25                   |
| B2M         | gamma_glutamylphenylalanine | 0.38                   | 5.84                | 0.43                    | 6.41                 | 12.25                   |
| APOA1       | one_palmitoyl_GPC           | 0.29                   | 3.40                | 0.50                    | 8.85                 | 12.25                   |
| REG1A       | X_12802                     | 0.35                   | 4.84                | 0.46                    | 7.40                 | 12.24                   |
| LRG1        | one_linoleoyl_GPC           | -0.45                  | 8.15                | -0.34                   | 4.09                 | 12.24                   |
| RBP4        | X_11423                     | 0.29                   | 3.58                | 0.49                    | 8.65                 | 12.23                   |
| ORM2        | X_12802                     | 0.41                   | 6.83                | 0.39                    | 5.40                 | 12.23                   |
| PTGDS       | gamma_glutamylphenylalanine | 0.39                   | 6.13                | 0.42                    | 6.09                 | 12.23                   |
| S100A9      | HPLA                        | 0.38                   | 5.80                | 0.43                    | 6.42                 | 12.22                   |
| PLG         | hexanoylcarnitine           | -0.31                  | 3.97                | -0.48                   | 8.25                 | 12.21                   |
| VWF         | seven_HOCA                  | 0.28                   | 3.19                | 0.50                    | 8.99                 | 12.18                   |
| FCGBP       | decanoylcarnitine           | 0.39                   | 6.17                | 0.41                    | 6.00                 | 12.17                   |
| IGFBP4      | X_12101                     | 0.48                   | 9.26                | 0.28                    | 2.90                 | 12.16                   |
| AFM         | X_12794                     | -0.39                  | 6.21                | -0.41                   | 5.94                 | 12.15                   |
| BAI2        | X_10395                     | -0.46                  | 8.46                | -0.32                   | 3.69                 | 12.15                   |
| APOB        | X_08402                     | 0.40                   | 6.49                | 0.40                    | 5.66                 | 12.15                   |
| ORM1        | tyrosine                    | -0.39                  | 6.03                | -0.42                   | 6.11                 | 12.14                   |
| S100A9      | one_stearoyl_GPC            | -0.28                  | 3.19                | -0.50                   | 8.94                 | 12.14                   |
| APOB        | X_10500                     | 0.41                   | 6.72                | 0.39                    | 5.42                 | 12.13                   |
| VASN        | N_acetylalanine             | 0.39                   | 6.14                | 0.41                    | 5.99                 | 12.12                   |
| IGFBP4      | four_acetamidobutanoate     | 0.47                   | 8.87                | 0.30                    | 3.25                 | 12.12                   |
| CST3        | one_methyladenosine         | 0.50                   | 10.12               | 0.22                    | 2.00                 | 12.12                   |
| LYZ         | X_02249                     | 0.48                   | 9.29                | 0.27                    | 2.82                 | 12.11                   |
| C7          | alpha_hydroxyisovalerate    | 0.42                   | 6.91                | 0.38                    | 5.20                 | 12.10                   |
| AZGP1       | X_05522                     | 0.41                   | 6.64                | 0.39                    | 5.46                 | 12.10                   |
| LYZ         | X_12217                     | 0.50                   | 10.22               | 0.22                    | 1.88                 | 12.10                   |
| S100A9      | tiglyl_carnitine            | 0.42                   | 7.05                | 0.38                    | 5.05                 | 12.09                   |
| CFHR2       | N2_N2_dimethylguanosine     | 0.43                   | 7.55                | 0.36                    | 4.54                 | 12.09                   |
| ORM2        | pseudouridine               | 0.39                   | 6.12                | 0.41                    | 5.96                 | 12.09                   |
| LCN2        | one_linoleoyl_GPC           | -0.28                  | 3.29                | -0.50                   | 8.80                 | 12.08                   |
| SERPINA3    | creatine                    | 0.45                   | 8.10                | 0.33                    | 3.98                 | 12.08                   |
| VSIG4       | N_acetylthreonine           | 0.37                   | 5.41                | 0.43                    | 6.66                 | 12.06                   |
| AFM         | beta_hydroxyisovalerate     | -0.48                  | 9.17                | -0.28                   | 2.89                 | 12.06                   |
| LCN2        | one_oleoyl_GPC              | -0.26                  | 2.80                | -0.51                   | 9.26                 | 12.06                   |
| SAA1        | X_11273                     | 0.41                   | 6.61                | 0.39                    | 5.45                 | 12.06                   |
| SPINK1      | X_11429                     | 0.43                   | 7.56                | 0.35                    | 4.49                 | 12.05                   |
| IGFBP4      | X_12117                     | 0.49                   | 9.60                | 0.25                    | 2.45                 | 12.05                   |
| LCN2        | X_12101                     | 0.36                   | 5.26                | 0.44                    | 6.77                 | 12.03                   |
| RBP4        | X_12206                     | 0.35                   | 4.88                | 0.45                    | 7.15                 | 12.03                   |
| AHSG        | one_palmitoleoyl_GPC        | 0.39                   | 6.07                | 0.41                    | 5.96                 | 12.03                   |
| B2M         | three_methylhistidine       | 0.43                   | 7.28                | 0.37                    | 4.74                 | 12.02                   |
| TTR         | X_09789                     | 0.40                   | 6.37                | 0.40                    | 5.65                 | 12.01                   |
| ULK4        | glycochenodeoxycholate      | -0.51                  | 10.38               | -0.20                   | 1.63                 | 12.01                   |
| RBP4        | erythronate                 | 0.31                   | 3.88                | 0.48                    | 8.12                 | 12.00                   |
| APOD        | X_10395                     | 0.47                   | 8.73                | 0.30                    | 3.26                 | 12.00                   |
| HPR         | citrate                     | -0.44                  | 7.59                | -0.35                   | 4.40                 | 11.99                   |
| LGALS3BP    | methionine                  | 0.40                   | 6.54                | 0.39                    | 5.45                 | 11.99                   |
| IGFBP4      | X_12742                     | 0.47                   | 9.00                | 0.28                    | 2.99                 | 11.99                   |
| AZGP1       | one_five_anhydroglucitol    | -0.38                  | 5.81                | -0.42                   | 6.18                 | 11.99                   |
| AHSG        | glutamate                   | 0.40                   | 6.34                | 0.40                    | 5.64                 | 11.98                   |
| AZGP1       | X_12100                     | 0.39                   | 6.16                | 0.41                    | 5.83                 | 11.98                   |
| S100A9      | X_13553                     | 0.38                   | 5.91                | 0.41                    | 6.08                 | 11.98                   |

| gene symbol | metabolite                  | t0 Pearson Correlation | t0 NegLog10 p-value | t24 Pearson Correlation | t24 NegLog10 p-value | Sum of NegLog10 p-value |
|-------------|-----------------------------|------------------------|---------------------|-------------------------|----------------------|-------------------------|
| HPX         | glycocholate                | -0.37                  | 5.62                | -0.42                   | 6.35                 | 11.97                   |
| VSIG4       | SDMA                        | 0.36                   | 5.36                | 0.43                    | 6.61                 | 11.97                   |
| RBP4        | X_11687                     | 0.32                   | 4.11                | 0.47                    | 7.86                 | 11.97                   |
| LCN2        | tiglyl_carnitine            | 0.34                   | 4.58                | 0.46                    | 7.38                 | 11.96                   |
| AFM         | one_palmitoyl_GPC           | 0.43                   | 7.32                | 0.36                    | 4.63                 | 11.95                   |
| CFD         | hippurate                   | 0.43                   | 7.43                | 0.36                    | 4.52                 | 11.95                   |
| LCN2        | deoxycarnitine              | 0.44                   | 7.71                | 0.34                    | 4.24                 | 11.95                   |
| AMBP        | X_06126                     | 0.42                   | 6.90                | 0.38                    | 5.04                 | 11.95                   |
| APOH        | X_02249                     | 0.44                   | 7.69                | 0.34                    | 4.26                 | 11.95                   |
| S100A8      | N_acetylthreonine           | 0.44                   | 7.90                | 0.34                    | 4.05                 | 11.95                   |
| ORM1        | X_11423                     | 0.39                   | 5.96                | 0.41                    | 5.97                 | 11.94                   |
| SPINK1      | tryptophan                  | -0.37                  | 5.48                | -0.43                   | 6.45                 | 11.93                   |
| PTGDS       | four_acetaminophen_sulfate  | 0.26                   | 2.98                | 0.50                    | 8.94                 | 11.92                   |
| VASN        | X_03951                     | 0.41                   | 6.75                | 0.38                    | 5.17                 | 11.92                   |
| LYZ         | X_12206                     | 0.51                   | 10.40               | 0.19                    | 1.52                 | 11.92                   |
| LCN2        | mannitol                    | 0.39                   | 5.94                | 0.41                    | 5.98                 | 11.92                   |
| C1QB        | glycochenodeoxycholate      | 0.48                   | 9.35                | 0.26                    | 2.56                 | 11.91                   |
| CES1        | lysine                      | 0.41                   | 6.77                | 0.38                    | 5.14                 | 11.90                   |
| LYZ         | catechol_sulfate            | 0.49                   | 9.82                | 0.23                    | 2.08                 | 11.90                   |
| APOC1       | X_10744                     | 0.41                   | 6.84                | 0.38                    | 5.05                 | 11.89                   |
| CFHR2       | X_04499                     | 0.38                   | 5.71                | 0.42                    | 6.18                 | 11.89                   |
| AMBP        | phosphate                   | 0.37                   | 5.43                | 0.43                    | 6.46                 | 11.89                   |
| TF          | one_stearoyl_GPC            | 0.36                   | 5.11                | 0.44                    | 6.78                 | 11.89                   |
| AFM         | one_stearoyl_GPC            | 0.39                   | 6.16                | 0.40                    | 5.73                 | 11.89                   |
| CST3        | two_methylbutyroylcarnitine | 0.43                   | 7.29                | 0.36                    | 4.59                 | 11.88                   |
| CFHR2       | X_11429                     | 0.43                   | 7.42                | 0.35                    | 4.46                 | 11.88                   |
| CFHR2       | X_11687                     | 0.42                   | 7.08                | 0.37                    | 4.79                 | 11.88                   |
| DEFA1       | one_linoleoyl_GPC           | -0.16                  | 1.24                | -0.54                   | 10.63                | 11.87                   |
| S100A8      | hydroxyisovaleroylcarnitine | 0.43                   | 7.57                | 0.35                    | 4.28                 | 11.85                   |
| LCN2        | X_04504                     | 0.42                   | 6.91                | 0.37                    | 4.93                 | 11.84                   |
| LCN2        | phenol_sulfate              | 0.40                   | 6.34                | 0.39                    | 5.49                 | 11.83                   |
| S100A8      | X_12802                     | 0.44                   | 7.74                | 0.34                    | 4.09                 | 11.82                   |
| HPX         | alpha_hydroxyisovalerate    | -0.41                  | 6.80                | -0.38                   | 5.01                 | 11.82                   |
| AHSG        | one_palmitoyl_GPC           | 0.41                   | 6.87                | 0.37                    | 4.94                 | 11.82                   |
| LYZ         | X_09789                     | 0.45                   | 7.96                | 0.33                    | 3.85                 | 11.81                   |
| DEFA1       | four_acetamidobutanoate     | 0.24                   | 2.46                | 0.51                    | 9.34                 | 11.80                   |
| AZGP1       | N_acetylaniline             | 0.44                   | 7.58                | 0.34                    | 4.22                 | 11.79                   |
| LCN2        | X_11334                     | 0.34                   | 4.74                | 0.45                    | 7.04                 | 11.78                   |
| ICAM2       | pipecolate                  | 0.37                   | 5.63                | 0.42                    | 6.15                 | 11.78                   |
| CFD         | arabinose                   | 0.29                   | 3.57                | 0.48                    | 8.20                 | 11.78                   |
| B2M         | X_12844                     | 0.40                   | 6.36                | 0.39                    | 5.40                 | 11.77                   |
| VTN         | X_11423                     | -0.36                  | 5.20                | -0.43                   | 6.57                 | 11.77                   |
| RBMX        | taurochenodeoxycholate      | 0.43                   | 7.37                | 0.35                    | 4.38                 | 11.76                   |
| CFD         | X_12104                     | 0.31                   | 4.03                | 0.47                    | 7.73                 | 11.75                   |
| IGFBP4      | X_12405                     | 0.46                   | 8.40                | 0.30                    | 3.36                 | 11.75                   |
| ICAM2       | alpha_hydroxyisovalerate    | 0.42                   | 6.95                | 0.37                    | 4.79                 | 11.74                   |
| GPX3        | X_04357                     | 0.49                   | 9.81                | 0.22                    | 1.92                 | 11.73                   |
| S100A8      | X_11244                     | 0.35                   | 4.85                | 0.44                    | 6.87                 | 11.72                   |
| SAA3P       | X_11245                     | 0.43                   | 7.34                | 0.35                    | 4.38                 | 11.72                   |
| PTGDS       | kynurenine                  | 0.38                   | 5.71                | 0.41                    | 6.01                 | 11.72                   |
| AZGP1       | X_12695                     | 0.40                   | 6.39                | 0.39                    | 5.33                 | 11.72                   |
| LCN2        | X_11423                     | 0.38                   | 5.83                | 0.41                    | 5.88                 | 11.71                   |
| RBP4        | X_12095                     | 0.30                   | 3.71                | 0.47                    | 8.00                 | 11.71                   |
| AHSG        | octanoylcarnitine           | -0.37                  | 5.56                | -0.42                   | 6.14                 | 11.70                   |
| APCS        | seven_HOCA                  | -0.39                  | 6.00                | -0.40                   | 5.69                 | 11.69                   |
| VASN        | erythronate                 | 0.38                   | 5.69                | 0.41                    | 5.99                 | 11.69                   |

| gene symbol | metabolite                   | t0 Pearson Correlation | t0 NegLog10 p-value | t24 Pearson Correlation | t24 NegLog10 p-value | Sum of NegLog10 p-value |
|-------------|------------------------------|------------------------|---------------------|-------------------------|----------------------|-------------------------|
| S100A8      | hexanoylcarnitine            | 0.44                   | 7.68                | 0.33                    | 4.00                 | 11.68                   |
| FABP1       | methionine                   | 0.26                   | 2.89                | 0.50                    | 8.77                 | 11.67                   |
| S100A8      | X_11273                      | 0.31                   | 3.83                | 0.47                    | 7.84                 | 11.67                   |
| ORM1        | X_11786                      | -0.39                  | 6.11                | -0.40                   | 5.56                 | 11.67                   |
| LCN2        | X_12742                      | 0.36                   | 5.32                | 0.42                    | 6.35                 | 11.67                   |
| SAA4        | X_03094                      | 0.34                   | 4.71                | 0.44                    | 6.96                 | 11.66                   |
| CFHR2       | X_12100                      | 0.42                   | 7.19                | 0.35                    | 4.47                 | 11.66                   |
| RBP4        | quininate                    | 0.27                   | 3.16                | 0.49                    | 8.50                 | 11.66                   |
| LBP         | X_14626                      | 0.38                   | 5.90                | 0.40                    | 5.76                 | 11.66                   |
| CD14        | X_12611                      | 0.25                   | 2.69                | 0.50                    | 8.96                 | 11.65                   |
| RBP4        | X_02249                      | 0.31                   | 4.00                | 0.46                    | 7.64                 | 11.64                   |
| LGALS3BP    | alpha_hydroxyisovalerate     | 0.36                   | 5.32                | 0.42                    | 6.31                 | 11.63                   |
| CST3        | tryptophan                   | -0.44                  | 7.76                | -0.33                   | 3.87                 | 11.63                   |
| APOA1       | X_12038                      | 0.41                   | 6.80                | 0.37                    | 4.82                 | 11.63                   |
| LYZ         | three_methylhistidine        | 0.42                   | 7.12                | 0.35                    | 4.50                 | 11.62                   |
| APOA1       | X_05907                      | 0.37                   | 5.54                | 0.41                    | 6.07                 | 11.62                   |
| HP          | seven_HOCA                   | -0.36                  | 5.22                | -0.43                   | 6.39                 | 11.62                   |
| DEFA1       | octanoylcarnitine            | 0.30                   | 3.83                | 0.47                    | 7.78                 | 11.61                   |
| VASN        | X_11429                      | 0.36                   | 5.31                | 0.42                    | 6.30                 | 11.61                   |
| GPX3        | histidine                    | 0.45                   | 8.27                | 0.30                    | 3.33                 | 11.61                   |
| CFD         | X_12611                      | 0.28                   | 3.19                | 0.49                    | 8.40                 | 11.59                   |
| C7          | glycocholate                 | 0.33                   | 4.55                | 0.45                    | 7.04                 | 11.59                   |
| LRG1        | one_palmitoleoyl_GPC         | -0.48                  | 9.13                | -0.25                   | 2.45                 | 11.58                   |
| AHSG        | X_11421                      | -0.36                  | 5.29                | -0.42                   | 6.29                 | 11.58                   |
| KNG1        | one_palmitoyl_GPC            | 0.39                   | 6.17                | 0.39                    | 5.40                 | 11.58                   |
| APOC3       | X_10395                      | 0.41                   | 6.83                | 0.37                    | 4.75                 | 11.57                   |
| AZGP1       | X_12217                      | 0.37                   | 5.62                | 0.41                    | 5.94                 | 11.57                   |
| CFHR2       | arabinose                    | 0.43                   | 7.49                | 0.34                    | 4.07                 | 11.56                   |
| APOC2       | X_12038                      | 0.31                   | 3.97                | 0.46                    | 7.59                 | 11.56                   |
| CST3        | cysteine                     | 0.32                   | 4.30                | 0.45                    | 7.26                 | 11.56                   |
| AZGP1       | X_12844                      | 0.37                   | 5.37                | 0.42                    | 6.19                 | 11.56                   |
| SAA3P       | X_11273                      | 0.39                   | 5.94                | 0.40                    | 5.61                 | 11.56                   |
| LYZ         | phenylacetylglutamine        | 0.52                   | 10.97               | 0.10                    | 0.58                 | 11.55                   |
| AFM         | mannose                      | -0.38                  | 5.93                | -0.40                   | 5.61                 | 11.55                   |
| RBP4        | glutaroylcarnitine           | 0.27                   | 3.09                | 0.49                    | 8.46                 | 11.55                   |
| PTGDS       | p_acetamidophenylglucuronide | 0.28                   | 3.23                | 0.48                    | 8.32                 | 11.55                   |
| S100A9      | X_11273                      | 0.37                   | 5.48                | 0.41                    | 6.06                 | 11.54                   |
| CFHR2       | X_02249                      | 0.41                   | 6.59                | 0.37                    | 4.95                 | 11.54                   |
| ICAM2       | seven_HOCA                   | 0.39                   | 6.06                | 0.39                    | 5.47                 | 11.53                   |
| IGFBP4      | X_05522                      | 0.46                   | 8.43                | 0.29                    | 3.10                 | 11.53                   |
| LCN2        | erythritol                   | 0.37                   | 5.50                | 0.41                    | 6.02                 | 11.52                   |
| RBP4        | X_07765                      | 0.38                   | 5.68                | 0.41                    | 5.84                 | 11.52                   |
| RBP4        | phenylacetylglutamine        | 0.29                   | 3.47                | 0.48                    | 8.03                 | 11.50                   |
| VTN         | X_05426                      | -0.37                  | 5.37                | -0.42                   | 6.13                 | 11.50                   |
| LYZ         | pyridoxate                   | 0.50                   | 10.10               | 0.18                    | 1.39                 | 11.50                   |
| CFD         | gulono_1_4_lactone           | 0.34                   | 4.76                | 0.44                    | 6.73                 | 11.49                   |
| SPINK1      | four_acetamidobutanoate      | 0.44                   | 7.81                | 0.32                    | 3.68                 | 11.49                   |
| RBP4        | X_05426                      | 0.36                   | 5.12                | 0.42                    | 6.37                 | 11.49                   |
| F12         | mannose                      | -0.38                  | 5.65                | -0.41                   | 5.84                 | 11.49                   |
| VASN        | xylonate                     | 0.35                   | 4.96                | 0.43                    | 6.53                 | 11.49                   |
| IGFBP4      | glutaroylcarnitine           | 0.45                   | 8.28                | 0.30                    | 3.21                 | 11.48                   |
| CFHR2       | X_12217                      | 0.43                   | 7.31                | 0.34                    | 4.17                 | 11.48                   |
| VWF         | X_10395                      | -0.42                  | 7.16                | -0.35                   | 4.31                 | 11.47                   |
| APOC3       | X_12104                      | 0.40                   | 6.30                | 0.38                    | 5.16                 | 11.46                   |
| VTN         | pyridoxate                   | -0.34                  | 4.61                | -0.44                   | 6.85                 | 11.46                   |
| RBP4        | citrulline                   | 0.26                   | 2.91                | 0.49                    | 8.55                 | 11.46                   |



| gene symbol | metabolite                      | t0 Pearson Correlation | t0 NegLog10 p-value | t24 Pearson Correlation | t24 NegLog10 p-value | Sum of NegLog10 p-value |
|-------------|---------------------------------|------------------------|---------------------|-------------------------|----------------------|-------------------------|
| ORM1        | four_acetamidobutanoate         | 0.37                   | 5.50                | 0.41                    | 5.95                 | 11.45                   |
| AZGP1       | p_cresol_sulfate                | 0.42                   | 7.18                | 0.35                    | 4.27                 | 11.45                   |
| AGT         | three_hydroxy_2_ethylpropionate | 0.45                   | 7.95                | 0.31                    | 3.49                 | 11.44                   |
| CFD         | phosphate                       | 0.35                   | 4.87                | 0.43                    | 6.56                 | 11.43                   |
| ORM1        | X_10483                         | 0.39                   | 6.12                | 0.39                    | 5.30                 | 11.43                   |
| VASN        | SDMA                            | 0.30                   | 3.81                | 0.46                    | 7.60                 | 11.42                   |
| AZGP1       | X_04498                         | 0.41                   | 6.75                | 0.36                    | 4.67                 | 11.42                   |
| CST3        | isobutyrylcarnitine             | 0.39                   | 6.16                | 0.38                    | 5.25                 | 11.41                   |
| RNASE1      | X_11510                         | 0.32                   | 4.19                | 0.45                    | 7.22                 | 11.41                   |
| S100A8      | deoxycarnitine                  | 0.47                   | 8.70                | 0.27                    | 2.71                 | 11.41                   |
| LYZ         | X_11826                         | 0.49                   | 9.75                | 0.20                    | 1.66                 | 11.41                   |
| IGFBP4      | X_04498                         | 0.49                   | 9.73                | 0.20                    | 1.68                 | 11.41                   |
| AZGP1       | X_12749                         | 0.37                   | 5.39                | 0.41                    | 6.00                 | 11.39                   |
| SAA3P       | X_05522                         | 0.43                   | 7.49                | 0.33                    | 3.90                 | 11.39                   |
| AMBP        | X_09789                         | 0.40                   | 6.51                | 0.37                    | 4.88                 | 11.38                   |
| ADIPOQ      | X_09789                         | 0.41                   | 6.87                | 0.36                    | 4.51                 | 11.38                   |
| LCN2        | taurocholate                    | 0.39                   | 6.08                | 0.39                    | 5.29                 | 11.37                   |
| CFD         | X_04504                         | 0.40                   | 6.32                | 0.38                    | 5.05                 | 11.37                   |
| SPINK1      | X_12117                         | 0.37                   | 5.57                | 0.40                    | 5.79                 | 11.36                   |
| FABP1       | tyrosine                        | 0.36                   | 5.30                | 0.41                    | 6.05                 | 11.36                   |
| SAA4        | X_10395                         | 0.46                   | 8.39                | 0.28                    | 2.97                 | 11.36                   |
| GPX3        | X_11423                         | -0.40                  | 6.36                | -0.38                   | 4.99                 | 11.35                   |
| DEFA1       | tiglyl_carnitine                | 0.32                   | 4.17                | 0.45                    | 7.18                 | 11.35                   |
| CFHR2       | N_acetylalanine                 | 0.43                   | 7.50                | 0.33                    | 3.84                 | 11.34                   |
| TF          | piperine                        | 0.22                   | 2.23                | 0.50                    | 9.11                 | 11.34                   |
| IGFBP4      | X_10483                         | 0.45                   | 8.17                | 0.29                    | 3.17                 | 11.33                   |
| S100A9      | X_11244                         | 0.36                   | 5.11                | 0.42                    | 6.21                 | 11.33                   |
| SERPINA3    | three_hydroxy_2_ethylpropionate | 0.43                   | 7.43                | 0.33                    | 3.90                 | 11.33                   |
| SPINK1      | one_methylimidazoleacetate      | 0.41                   | 6.76                | 0.36                    | 4.56                 | 11.31                   |
| ORM2        | X_12117                         | 0.36                   | 5.29                | 0.41                    | 6.01                 | 11.31                   |
| LBP         | X_11245                         | 0.40                   | 6.51                | 0.37                    | 4.80                 | 11.30                   |
| CST3        | phosphate                       | 0.31                   | 3.87                | 0.46                    | 7.43                 | 11.30                   |
| S100A8      | X_11429                         | 0.47                   | 8.81                | 0.26                    | 2.49                 | 11.30                   |
| SERPINC1    | one_palmitoyl_GPC               | 0.30                   | 3.71                | 0.46                    | 7.59                 | 11.30                   |
| B2M         | X_11838                         | 0.27                   | 3.02                | 0.48                    | 8.27                 | 11.28                   |
| S100A8      | N_acetylneuraminate             | 0.40                   | 6.40                | 0.37                    | 4.88                 | 11.28                   |
| RNASE1      | X_11421                         | 0.37                   | 5.38                | 0.41                    | 5.90                 | 11.28                   |
| CST3        | kynurenine                      | 0.35                   | 4.85                | 0.43                    | 6.43                 | 11.28                   |
| LBP         | androsterone_sulfate            | 0.44                   | 7.72                | 0.31                    | 3.55                 | 11.28                   |
| S100A9      | N_acetylthreonine               | 0.34                   | 4.65                | 0.43                    | 6.62                 | 11.27                   |
| CFHR2       | X_12742                         | 0.39                   | 6.17                | 0.38                    | 5.10                 | 11.27                   |
| VTN         | X_04507                         | -0.35                  | 4.83                | -0.43                   | 6.43                 | 11.26                   |
| REG1A       | X_04499                         | 0.36                   | 5.10                | 0.42                    | 6.15                 | 11.25                   |
| LCN2        | X_04499                         | 0.43                   | 7.31                | 0.33                    | 3.93                 | 11.24                   |
| C7          | methionine                      | 0.43                   | 7.50                | 0.32                    | 3.74                 | 11.23                   |
| B2M         | tryptophan                      | -0.44                  | 7.65                | -0.31                   | 3.59                 | 11.23                   |
| LYZ         | erythritol                      | 0.50                   | 10.01               | 0.17                    | 1.23                 | 11.23                   |
| S100A8      | X_10483                         | 0.41                   | 6.73                | 0.36                    | 4.51                 | 11.23                   |
| REG1A       | X_04507                         | 0.36                   | 5.13                | 0.42                    | 6.09                 | 11.22                   |
| VSIG4       | pipecolate                      | 0.19                   | 1.75                | 0.51                    | 9.46                 | 11.21                   |
| KNG1        | X_05907                         | 0.35                   | 4.99                | 0.42                    | 6.22                 | 11.21                   |
| TIMP1       | one_eicosatrienoyl_GPC          | -0.34                  | 4.68                | -0.43                   | 6.53                 | 11.21                   |
| APOC2       | one_stearoylglycerol            | 0.40                   | 6.44                | 0.37                    | 4.77                 | 11.21                   |
| CST3        | octanoylcarnitine               | 0.39                   | 6.17                | 0.38                    | 5.04                 | 11.21                   |
| SERPINF1    | X_12092                         | 0.35                   | 4.97                | 0.42                    | 6.24                 | 11.20                   |
| GPX3        | HPLA                            | 0.46                   | 8.59                | 0.26                    | 2.61                 | 11.19                   |

| gene symbol | metabolite                     | t0 Pearson Correlation | t0 NegLog10 p-value | t24 Pearson Correlation | t24 NegLog10 p-value | Sum of NegLog10 p-value |
|-------------|--------------------------------|------------------------|---------------------|-------------------------|----------------------|-------------------------|
| IGFBP4      | X_04504                        | 0.45                   | 8.21                | 0.28                    | 2.98                 | 11.19                   |
| REG1A       | X_04504                        | 0.35                   | 4.91                | 0.42                    | 6.28                 | 11.19                   |
| CFHR2       | one_methylimidazoleacetate     | 0.43                   | 7.46                | 0.32                    | 3.72                 | 11.18                   |
| B2M         | X_07765                        | 0.39                   | 6.06                | 0.38                    | 5.11                 | 11.18                   |
| LCN2        | N_acetylneuraminate            | 0.33                   | 4.39                | 0.44                    | 6.79                 | 11.18                   |
| TTR         | X_07765                        | 0.39                   | 6.07                | 0.38                    | 5.11                 | 11.17                   |
| AHSG        | one_linoleoyl_GPC              | 0.34                   | 4.73                | 0.43                    | 6.42                 | 11.15                   |
| VTN         | arabinose                      | -0.32                  | 4.11                | -0.45                   | 7.04                 | 11.15                   |
| TTR         | one_palmitoyl_GPC              | 0.39                   | 6.11                | 0.38                    | 5.04                 | 11.15                   |
| SERPINA3    | X_11445                        | 0.37                   | 5.45                | 0.40                    | 5.69                 | 11.14                   |
| VASN        | allantoin                      | 0.36                   | 5.25                | 0.41                    | 5.89                 | 11.14                   |
| LCN2        | hippurate                      | 0.38                   | 5.79                | 0.39                    | 5.34                 | 11.14                   |
| APOC1       | one_stearoylglycerol           | 0.45                   | 8.17                | 0.28                    | 2.96                 | 11.13                   |
| ORM2        | X_11423                        | 0.38                   | 5.67                | 0.39                    | 5.46                 | 11.13                   |
| SAA1        | four_acetaminophen_sulfate     | 0.31                   | 3.87                | 0.45                    | 7.25                 | 11.12                   |
| S100A9      | N_acetylneuraminate            | 0.37                   | 5.44                | 0.40                    | 5.68                 | 11.11                   |
| MB          | octanoylcarnitine              | 0.35                   | 5.08                | 0.41                    | 6.04                 | 11.11                   |
| REG1A       | X_12117                        | 0.30                   | 3.61                | 0.46                    | 7.50                 | 11.11                   |
| B2M         | X_11787                        | -0.32                  | 4.25                | -0.44                   | 6.86                 | 11.11                   |
| TF          | one_palmitoleoyl_GPC           | 0.38                   | 5.88                | 0.38                    | 5.23                 | 11.11                   |
| APOC3       | X_05907                        | 0.37                   | 5.36                | 0.40                    | 5.74                 | 11.11                   |
| VASN        | arabitol                       | 0.36                   | 5.13                | 0.41                    | 5.98                 | 11.11                   |
| AMBP        | X_04495                        | 0.43                   | 7.48                | 0.32                    | 3.63                 | 11.11                   |
| IGFBP4      | X_12104                        | 0.48                   | 9.46                | 0.20                    | 1.63                 | 11.09                   |
| CFHR2       | X_12688                        | 0.42                   | 7.09                | 0.33                    | 4.00                 | 11.09                   |
| HPX         | HPLA                           | -0.42                  | 6.96                | -0.34                   | 4.12                 | 11.08                   |
| APOA1       | one_eicosatrienoyl_GPC         | 0.32                   | 4.17                | 0.44                    | 6.91                 | 11.07                   |
| COPB1       | seven_HOCA                     | 0.32                   | 4.08                | 0.44                    | 6.99                 | 11.07                   |
| VASN        | X_12100                        | 0.36                   | 5.23                | 0.41                    | 5.84                 | 11.07                   |
| ORM2        | N_acetylalanine                | 0.35                   | 5.03                | 0.41                    | 6.04                 | 11.06                   |
| LUM         | X_13553                        | 0.32                   | 4.23                | 0.44                    | 6.83                 | 11.06                   |
| C1QC        | X_10395                        | -0.43                  | 7.49                | -0.31                   | 3.56                 | 11.05                   |
| SAA3P       | four_acetaminophen_sulfate     | 0.31                   | 3.97                | 0.45                    | 7.08                 | 11.04                   |
| S100A8      | HPLA                           | 0.41                   | 6.85                | 0.34                    | 4.20                 | 11.04                   |
| APOA2       | one_eicosatrienoyl_GPC         | 0.35                   | 4.84                | 0.42                    | 6.19                 | 11.03                   |
| S100A8      | X_13553                        | 0.42                   | 7.00                | 0.33                    | 4.03                 | 11.03                   |
| LCN2        | allantoin                      | 0.40                   | 6.46                | 0.36                    | 4.57                 | 11.02                   |
| C7          | caffeine                       | 0.33                   | 4.49                | 0.43                    | 6.52                 | 11.01                   |
| C7          | X_11538                        | 0.39                   | 6.07                | 0.37                    | 4.94                 | 11.01                   |
| S100A9      | octanoylcarnitine              | 0.37                   | 5.54                | 0.39                    | 5.47                 | 11.00                   |
| RBP4        | three_methylhistidine          | 0.30                   | 3.63                | 0.46                    | 7.37                 | 11.00                   |
| ORM2        | X_05522                        | 0.39                   | 6.22                | 0.37                    | 4.78                 | 11.00                   |
| CFHR2       | glutaryl carnitine             | 0.40                   | 6.43                | 0.36                    | 4.56                 | 11.00                   |
| AHSG        | X_11795                        | 0.30                   | 3.64                | 0.46                    | 7.36                 | 10.99                   |
| SAA1        | threonine                      | -0.35                  | 4.95                | -0.41                   | 6.04                 | 10.99                   |
| AZGP1       | pantothenate                   | 0.39                   | 6.07                | 0.37                    | 4.91                 | 10.99                   |
| REG1A       | arabitol                       | 0.33                   | 4.44                | 0.43                    | 6.55                 | 10.99                   |
| IGFBP4      | X_11429                        | 0.46                   | 8.66                | 0.25                    | 2.32                 | 10.99                   |
| SERPINA3    | one_oleoyl_GPC                 | -0.38                  | 5.83                | -0.38                   | 5.16                 | 10.99                   |
| IGFBP4      | X_12695                        | 0.44                   | 7.86                | 0.29                    | 3.12                 | 10.98                   |
| CRP         | two_palmitoyl_GPC              | -0.38                  | 5.94                | -0.38                   | 5.04                 | 10.98                   |
| ORM1        | N2_N2_dimethylguanosine        | 0.39                   | 6.05                | 0.37                    | 4.93                 | 10.97                   |
| SPINK1      | N6_carbamoylthreonyl adenosine | 0.39                   | 6.07                | 0.37                    | 4.89                 | 10.96                   |
| AHSG        | X_12794                        | -0.34                  | 4.56                | -0.43                   | 6.40                 | 10.96                   |
| CFHR2       | X_12206                        | 0.34                   | 4.77                | 0.42                    | 6.19                 | 10.96                   |
| REG1A       | glutaryl carnitine             | 0.33                   | 4.41                | 0.43                    | 6.55                 | 10.96                   |

| gene symbol | metabolite                      | t0 Pearson Correlation | t0 NegLog10 p-value | t24 Pearson Correlation | t24 NegLog10 p-value | Sum of NegLog10 p-value |
|-------------|---------------------------------|------------------------|---------------------|-------------------------|----------------------|-------------------------|
| CES1        | X_12786                         | 0.33                   | 4.32                | 0.43                    | 6.64                 | 10.96                   |
| RNASE1      | p_acetamidophenylglucuronide    | 0.31                   | 4.01                | 0.44                    | 6.94                 | 10.95                   |
| CFHR2       | hippurate                       | 0.42                   | 6.95                | 0.33                    | 4.00                 | 10.95                   |
| APOC2       | X_10500                         | 0.32                   | 4.10                | 0.44                    | 6.85                 | 10.95                   |
| VASN        | erythritol                      | 0.36                   | 5.28                | 0.40                    | 5.67                 | 10.95                   |
| FCGBP       | X_10395                         | -0.45                  | 8.01                | -0.28                   | 2.94                 | 10.95                   |
| AHSG        | hexanoylcarnitine               | -0.39                  | 6.10                | -0.37                   | 4.85                 | 10.95                   |
| REG1A       | urea                            | 0.32                   | 4.19                | 0.44                    | 6.76                 | 10.94                   |
| IGFBP4      | pyridoxate                      | 0.45                   | 8.03                | 0.28                    | 2.91                 | 10.94                   |
| REG1A       | phosphate                       | 0.20                   | 1.92                | 0.50                    | 9.02                 | 10.94                   |
| PLG         | X_12802                         | -0.25                  | 2.64                | -0.48                   | 8.30                 | 10.93                   |
| AFP         | HPLA                            | 0.49                   | 9.88                | 0.15                    | 1.04                 | 10.92                   |
| ORM1        | X_05522                         | 0.40                   | 6.38                | 0.36                    | 4.54                 | 10.92                   |
| TF          | one_palmitoyl_GPC               | 0.36                   | 5.36                | 0.40                    | 5.56                 | 10.92                   |
| LCN2        | X_12117                         | 0.38                   | 5.74                | 0.38                    | 5.18                 | 10.92                   |
| SAA1        | X_12510                         | -0.39                  | 5.95                | -0.37                   | 4.96                 | 10.91                   |
| ITIH2       | X_12794                         | -0.36                  | 5.11                | -0.41                   | 5.80                 | 10.90                   |
| ITIH2       | two_methylbutyrylcarnitine      | -0.29                  | 3.56                | -0.46                   | 7.35                 | 10.90                   |
| VASN        | N6_carbamoylthreonyladenosine   | 0.37                   | 5.54                | 0.39                    | 5.35                 | 10.89                   |
| HBD         | AMP                             | 0.25                   | 2.72                | 0.48                    | 8.17                 | 10.89                   |
| ORM2        | four_acetamidobutanoate         | 0.34                   | 4.78                | 0.42                    | 6.11                 | 10.89                   |
| DEFA1       | N_acetylneuraminate             | 0.27                   | 3.04                | 0.47                    | 7.84                 | 10.88                   |
| ORM1        | phenylacetylglutamine           | 0.31                   | 4.04                | 0.44                    | 6.84                 | 10.88                   |
| LGALS3BP    | X_12850                         | 0.40                   | 6.38                | 0.36                    | 4.50                 | 10.88                   |
| GPX3        | creatinine                      | -0.41                  | 6.80                | -0.34                   | 4.07                 | 10.88                   |
| LUM         | HPLA                            | 0.30                   | 3.68                | 0.45                    | 7.19                 | 10.87                   |
| VASN        | X_12611                         | 0.43                   | 7.49                | 0.30                    | 3.38                 | 10.87                   |
| LCN2        | X_11826                         | 0.34                   | 4.75                | 0.42                    | 6.12                 | 10.87                   |
| FCGBP       | three_hydroxy_2_ethylpropionate | 0.42                   | 7.17                | 0.32                    | 3.69                 | 10.87                   |
| APOC3       | X_11334                         | 0.39                   | 6.08                | 0.37                    | 4.77                 | 10.85                   |
| C1QB        | seven_HOCA                      | 0.37                   | 5.57                | 0.39                    | 5.28                 | 10.85                   |
| SAA1        | androsterone_sulfate            | 0.40                   | 6.30                | 0.36                    | 4.54                 | 10.85                   |
| LYZ         | X_11687                         | 0.49                   | 9.84                | 0.15                    | 1.01                 | 10.84                   |
| CES1        | proline                         | 0.30                   | 3.69                | 0.45                    | 7.15                 | 10.84                   |
| VWF         | taurocholate                    | 0.38                   | 5.78                | 0.38                    | 5.06                 | 10.84                   |
| AFM         | tryptophan                      | 0.40                   | 6.53                | 0.35                    | 4.30                 | 10.84                   |
| SAA4        | X_10500                         | 0.34                   | 4.76                | 0.41                    | 6.08                 | 10.83                   |
| VSIG4       | X_13553                         | 0.33                   | 4.44                | 0.43                    | 6.39                 | 10.82                   |
| PLG         | octanoylcarnitine               | -0.28                  | 3.31                | -0.46                   | 7.51                 | 10.82                   |
| ORM1        | N_acetylthreonine               | 0.41                   | 6.89                | 0.33                    | 3.93                 | 10.82                   |
| AMBP        | tiglyl_carnitine                | 0.33                   | 4.39                | 0.43                    | 6.42                 | 10.81                   |
| RBP4        | pantothenate                    | 0.32                   | 4.12                | 0.43                    | 6.68                 | 10.80                   |
| ITIH2       | beta_hydroxyisovalerate         | -0.39                  | 6.02                | -0.37                   | 4.78                 | 10.80                   |
| IGFBP4      | hippurate                       | 0.46                   | 8.54                | 0.24                    | 2.24                 | 10.79                   |
| SERPINA3    | mannose                         | 0.26                   | 2.97                | 0.47                    | 7.81                 | 10.78                   |
| SAA3P       | glutamine                       | -0.38                  | 5.72                | -0.38                   | 5.06                 | 10.78                   |
| ORM2        | N2_N2_dimethylguanosine         | 0.37                   | 5.41                | 0.39                    | 5.37                 | 10.78                   |
| SAA1        | palmitoylcarnitine              | -0.42                  | 7.13                | -0.32                   | 3.65                 | 10.78                   |
| SPINK1      | pseudouridine                   | 0.41                   | 6.88                | 0.33                    | 3.89                 | 10.77                   |
| SERPIND1    | taurochenodeoxycholate          | -0.41                  | 6.88                | -0.33                   | 3.89                 | 10.77                   |
| VSIG4       | X_10483                         | 0.40                   | 6.46                | 0.35                    | 4.31                 | 10.77                   |
| ULK4        | alpha_hydroxyisovalerate        | -0.38                  | 5.89                | -0.37                   | 4.88                 | 10.77                   |
| APOC3       | alpha_tocopherol                | 0.42                   | 7.03                | 0.32                    | 3.74                 | 10.77                   |
| ORM1        | prolylhydroxyproline            | 0.36                   | 5.18                | 0.40                    | 5.58                 | 10.76                   |
| PLG         | one_palmitoyl_GPC               | 0.30                   | 3.66                | 0.45                    | 7.11                 | 10.76                   |
| VTN         | threonate                       | -0.38                  | 5.83                | -0.37                   | 4.94                 | 10.76                   |

| gene symbol | metabolite                       | t0 Pearson Correlation | t0 NegLog10 p-value | t24 Pearson Correlation | t24 NegLog10 p-value | Sum of NegLog10 p-value |
|-------------|----------------------------------|------------------------|---------------------|-------------------------|----------------------|-------------------------|
| REG1A       | X_12217                          | 0.33                   | 4.37                | 0.43                    | 6.39                 | 10.76                   |
| LBP         | mannose                          | 0.34                   | 4.63                | 0.42                    | 6.13                 | 10.76                   |
| PLG         | X_03056                          | -0.28                  | 3.20                | -0.46                   | 7.56                 | 10.76                   |
| LYZ         | X_11593                          | 0.48                   | 9.41                | 0.17                    | 1.34                 | 10.75                   |
| CFHR2       | X_11593                          | 0.35                   | 4.96                | 0.40                    | 5.79                 | 10.75                   |
| S100A9      | three_hydroxy_2_ethylpropionate  | 0.39                   | 6.05                | 0.36                    | 4.69                 | 10.74                   |
| ULK4        | X_12850                          | -0.47                  | 8.71                | -0.23                   | 2.03                 | 10.73                   |
| LCN2        | X_12458                          | 0.33                   | 4.36                | 0.42                    | 6.37                 | 10.73                   |
| RNASE1      | X_11437                          | 0.34                   | 4.73                | 0.41                    | 6.00                 | 10.73                   |
| LCN2        | xylonate                         | 0.37                   | 5.40                | 0.39                    | 5.33                 | 10.73                   |
| APOD        | cholesterol                      | 0.34                   | 4.66                | 0.41                    | 6.07                 | 10.72                   |
| APOH        | X_12844                          | 0.38                   | 5.66                | 0.38                    | 5.06                 | 10.72                   |
| TF          | one_five_anhydroglucitol         | 0.27                   | 3.03                | 0.47                    | 7.69                 | 10.72                   |
| C1QB        | SDMA                             | 0.40                   | 6.54                | 0.34                    | 4.16                 | 10.71                   |
| ORM1        | X_12117                          | 0.36                   | 5.33                | 0.39                    | 5.37                 | 10.70                   |
| DEFA1       | X_03056                          | 0.27                   | 3.01                | 0.47                    | 7.69                 | 10.70                   |
| APOA1       | one_stearoyl_GPC                 | 0.25                   | 2.70                | 0.47                    | 8.00                 | 10.70                   |
| RBMX        | alpha_hydroxyisovalerate         | 0.40                   | 6.28                | 0.35                    | 4.42                 | 10.70                   |
| RBP4        | X_03951                          | 0.25                   | 2.73                | 0.47                    | 7.96                 | 10.69                   |
| AZGP1       | X_03056                          | 0.38                   | 5.84                | 0.37                    | 4.85                 | 10.69                   |
| APOA1       | piperine                         | 0.40                   | 6.50                | 0.34                    | 4.19                 | 10.69                   |
| LBP         | tryptophan                       | -0.37                  | 5.51                | -0.38                   | 5.18                 | 10.69                   |
| LCN2        | X_12217                          | 0.38                   | 5.66                | 0.38                    | 5.02                 | 10.68                   |
| IGFBP4      | X_12100                          | 0.45                   | 8.10                | 0.26                    | 2.59                 | 10.68                   |
| AMBP        | two_hydroxyacetaminophen_sulfate | 0.26                   | 2.93                | 0.47                    | 7.75                 | 10.68                   |
| ICAM2       | taurocholate                     | 0.35                   | 5.03                | 0.40                    | 5.65                 | 10.68                   |
| REG1A       | X_11429                          | 0.34                   | 4.80                | 0.41                    | 5.88                 | 10.68                   |
| REG1A       | X_04498                          | 0.35                   | 4.96                | 0.40                    | 5.70                 | 10.66                   |
| RBP4        | X_12104                          | 0.30                   | 3.69                | 0.44                    | 6.96                 | 10.66                   |
| CST3        | xylose                           | 0.30                   | 3.61                | 0.45                    | 7.04                 | 10.65                   |
| AZGP1       | X_04504                          | 0.39                   | 5.98                | 0.36                    | 4.67                 | 10.64                   |
| GPX3        | phenylacetylglutamine            | -0.39                  | 5.95                | -0.36                   | 4.69                 | 10.64                   |
| SERPIND1    | X_10395                          | 0.45                   | 8.19                | 0.25                    | 2.44                 | 10.63                   |
| PGLYRP2     | one_palmitoyl_GPC                | 0.36                   | 5.32                | 0.39                    | 5.31                 | 10.63                   |
| LCN2        | X_03951                          | 0.38                   | 5.85                | 0.37                    | 4.78                 | 10.63                   |
| S100A8      | androsterone_sulfate             | 0.38                   | 5.75                | 0.37                    | 4.88                 | 10.63                   |
| LBP         | X_11273                          | 0.40                   | 6.28                | 0.35                    | 4.35                 | 10.63                   |
| DEFA1       | two_methylbutyrylcarnitine       | 0.31                   | 4.01                | 0.43                    | 6.61                 | 10.63                   |
| AFM         | one_palmitoleoyl_GPC             | 0.41                   | 6.84                | 0.32                    | 3.77                 | 10.61                   |
| S100A8      | X_11443                          | 0.36                   | 5.20                | 0.39                    | 5.41                 | 10.61                   |
| LCN2        | X_10266                          | 0.35                   | 4.83                | 0.40                    | 5.77                 | 10.61                   |
| CFD         | X_12095                          | 0.38                   | 5.68                | 0.37                    | 4.92                 | 10.60                   |
| SEPP1       | one_palmitoyl_GPC                | 0.45                   | 8.26                | 0.25                    | 2.34                 | 10.60                   |
| CFHR2       | N_acetylneuraminate              | 0.38                   | 5.67                | 0.37                    | 4.93                 | 10.60                   |
| DEFA1       | one_oleoyl_GPC                   | -0.09                  | 0.58                | -0.53                   | 10.02                | 10.59                   |
| CFHR2       | X_12092                          | 0.36                   | 5.17                | 0.39                    | 5.42                 | 10.59                   |
| REG1A       | X_11423                          | 0.26                   | 2.86                | 0.47                    | 7.72                 | 10.59                   |
| IGFBP4      | X_11826                          | 0.43                   | 7.43                | 0.29                    | 3.15                 | 10.59                   |
| AZGP1       | N2_N2_dimethylguanosine          | 0.39                   | 5.96                | 0.36                    | 4.62                 | 10.58                   |
| GPX3        | X_05426                          | -0.33                  | 4.50                | -0.41                   | 6.08                 | 10.58                   |
| SERPIND1    | X_11538                          | -0.36                  | 5.12                | -0.39                   | 5.46                 | 10.58                   |
| HP          | citrate                          | -0.40                  | 6.27                | -0.35                   | 4.30                 | 10.57                   |
| CD14        | one_linoleoyl_GPC                | -0.25                  | 2.73                | -0.47                   | 7.84                 | 10.56                   |
| VTN         | N6_carbamoylthreonyladenosine    | -0.31                  | 4.03                | -0.43                   | 6.52                 | 10.55                   |
| ORM2        | phenylacetylglutamine            | 0.30                   | 3.73                | 0.44                    | 6.83                 | 10.55                   |
| PLEK        | aspartate                        | 0.26                   | 2.82                | 0.47                    | 7.74                 | 10.55                   |

| gene symbol | metabolite                       | t0 Pearson Correlation | t0 NegLog10 p-value | t24 Pearson Correlation | t24 NegLog10 p-value | Sum of NegLog10 p-value |
|-------------|----------------------------------|------------------------|---------------------|-------------------------|----------------------|-------------------------|
| CD14        | three_hydroxy_2_ethylpropionate  | 0.36                   | 5.09                | 0.39                    | 5.45                 | 10.55                   |
| ORM2        | X_10483                          | 0.36                   | 5.14                | 0.39                    | 5.40                 | 10.55                   |
| CFD         | X_08889                          | 0.31                   | 3.97                | 0.43                    | 6.58                 | 10.55                   |
| B2M         | isobutyrylcarnitine              | 0.36                   | 5.13                | 0.39                    | 5.41                 | 10.54                   |
| SAA4        | one_stearoylglycerol             | 0.33                   | 4.50                | 0.41                    | 6.03                 | 10.53                   |
| SAA3P       | X_03056                          | 0.45                   | 7.96                | 0.26                    | 2.56                 | 10.52                   |
| GPX3        | alpha_hydroxyisovalerate         | 0.46                   | 8.59                | 0.22                    | 1.92                 | 10.51                   |
| VTN         | X_12695                          | -0.27                  | 3.04                | -0.46                   | 7.47                 | 10.51                   |
| DEFA1       | hexanoylcarnitine                | 0.26                   | 2.96                | 0.46                    | 7.54                 | 10.50                   |
| DEFA1       | X_04595                          | 0.41                   | 6.57                | 0.33                    | 3.93                 | 10.50                   |
| S100A9      | X_12794                          | 0.43                   | 7.34                | 0.29                    | 3.16                 | 10.50                   |
| ORM1        | one_stearoyl_GPC                 | -0.39                  | 6.08                | -0.35                   | 4.41                 | 10.50                   |
| REG1A       | X_12405                          | 0.25                   | 2.62                | 0.47                    | 7.88                 | 10.49                   |
| S100A8      | butyrylcarnitine                 | 0.45                   | 8.06                | 0.25                    | 2.44                 | 10.49                   |
| KNG1        | X_09789                          | 0.38                   | 5.77                | 0.36                    | 4.72                 | 10.49                   |
| LCN2        | arabinose                        | 0.35                   | 4.94                | 0.40                    | 5.54                 | 10.48                   |
| VASN        | X_11423                          | 0.37                   | 5.38                | 0.38                    | 5.10                 | 10.48                   |
| RBP4        | N6_carbamoylthreonyladenine      | 0.29                   | 3.47                | 0.45                    | 7.00                 | 10.47                   |
| CFD         | X_04498                          | 0.31                   | 3.98                | 0.43                    | 6.49                 | 10.46                   |
| VTN         | X_12104                          | -0.34                  | 4.68                | -0.40                   | 5.78                 | 10.46                   |
| LCN2        | prolylhydroxyproline             | 0.34                   | 4.59                | 0.41                    | 5.85                 | 10.44                   |
| VTN         | allantoin                        | -0.32                  | 4.30                | -0.42                   | 6.14                 | 10.44                   |
| RNASE1      | three_cystein_S_yl_acetaminophen | 0.25                   | 2.66                | 0.47                    | 7.78                 | 10.44                   |
| FCGBP       | X_12802                          | 0.28                   | 3.37                | 0.45                    | 7.07                 | 10.44                   |
| VTN         | erythronate                      | -0.32                  | 4.17                | -0.42                   | 6.27                 | 10.43                   |
| ORM2        | X_04499                          | 0.39                   | 6.00                | 0.35                    | 4.43                 | 10.43                   |
| LGALS3BP    | proline                          | 0.42                   | 6.99                | 0.31                    | 3.44                 | 10.43                   |
| AZGP1       | allantoin                        | 0.37                   | 5.53                | 0.37                    | 4.90                 | 10.43                   |
| AHSG        | tryptophan                       | 0.35                   | 5.03                | 0.39                    | 5.39                 | 10.43                   |
| VASN        | X_04507                          | 0.36                   | 5.31                | 0.38                    | 5.11                 | 10.43                   |
| FCGBP       | N_acetylneuraminate              | 0.37                   | 5.39                | 0.38                    | 5.04                 | 10.42                   |
| KNG1        | one_stearoyl_GPC                 | 0.37                   | 5.36                | 0.38                    | 5.05                 | 10.41                   |
| REG1A       | three_indoxyl_sulfate            | 0.21                   | 1.98                | 0.49                    | 8.42                 | 10.40                   |
| LYZ         | X_04504                          | 0.48                   | 9.26                | 0.16                    | 1.14                 | 10.40                   |
| GPX3        | X_12117                          | -0.38                  | 5.83                | -0.36                   | 4.56                 | 10.39                   |
| APOC1       | X_05907                          | 0.36                   | 5.15                | 0.38                    | 5.24                 | 10.39                   |
| DEFA1       | three_hydroxy_2_ethylpropionate  | 0.25                   | 2.64                | 0.47                    | 7.74                 | 10.38                   |
| GPX3        | threitol                         | -0.38                  | 5.73                | -0.36                   | 4.65                 | 10.38                   |
| APOA4       | four_vinylphenol_sulfate         | 0.36                   | 5.32                | 0.38                    | 5.07                 | 10.38                   |
| SAA1        | citrate                          | -0.42                  | 6.98                | -0.31                   | 3.40                 | 10.38                   |
| SERPINA3    | two_palmitoyl_GPC                | -0.38                  | 5.68                | -0.36                   | 4.69                 | 10.38                   |
| VASN        | X_11687                          | 0.33                   | 4.31                | 0.41                    | 6.07                 | 10.38                   |
| APOC3       | creatinine                       | 0.36                   | 5.21                | 0.38                    | 5.16                 | 10.37                   |
| VWF         | one_stearoyl_GPC                 | -0.31                  | 3.84                | -0.43                   | 6.53                 | 10.37                   |
| IGFBP4      | X_12095                          | 0.46                   | 8.65                | 0.20                    | 1.72                 | 10.37                   |
| LCN2        | one_arachidoyl_GPE               | -0.32                  | 4.26                | -0.42                   | 6.10                 | 10.36                   |
| COL3A1      | HPLA                             | 0.44                   | 7.65                | 0.27                    | 2.71                 | 10.36                   |
| S100A8      | N_acetylalanine                  | 0.39                   | 6.03                | 0.35                    | 4.33                 | 10.36                   |
| PTGDS       | X_09789                          | 0.33                   | 4.40                | 0.41                    | 5.96                 | 10.36                   |
| CST3        | carnitine                        | -0.28                  | 3.31                | -0.45                   | 7.04                 | 10.35                   |
| LCN2        | X_12099                          | 0.41                   | 6.72                | 0.32                    | 3.63                 | 10.35                   |
| TF          | one_linoleoyl_GPC                | 0.34                   | 4.75                | 0.40                    | 5.60                 | 10.35                   |
| CFHR2       | X_10483                          | 0.39                   | 6.15                | 0.34                    | 4.20                 | 10.35                   |
| RNASE1      | malate                           | 0.37                   | 5.52                | 0.37                    | 4.83                 | 10.35                   |
| PLG         | one_stearoyl_GPC                 | 0.31                   | 4.00                | 0.42                    | 6.34                 | 10.34                   |
| APOC3       | gulono_1_4_lactone               | 0.37                   | 5.48                | 0.37                    | 4.86                 | 10.34                   |

| gene symbol | metabolite                 | t0 Pearson Correlation | t0 NegLog10 p-value | t24 Pearson Correlation | t24 NegLog10 p-value | Sum of NegLog10 p-value |
|-------------|----------------------------|------------------------|---------------------|-------------------------|----------------------|-------------------------|
| ORM2        | X_11786                    | -0.39                  | 6.10                | -0.34                   | 4.24                 | 10.34                   |
| S100A8      | urea                       | 0.42                   | 7.05                | 0.30                    | 3.29                 | 10.34                   |
| APOB        | alpha_tocopherol           | 0.36                   | 5.21                | 0.38                    | 5.12                 | 10.34                   |
| CRP         | one_oleoyl_GPE             | -0.38                  | 5.74                | -0.36                   | 4.59                 | 10.33                   |
| LRG1        | threonine                  | -0.35                  | 5.01                | -0.39                   | 5.32                 | 10.33                   |
| GC          | hexanoylcarnitine          | -0.34                  | 4.66                | -0.40                   | 5.66                 | 10.33                   |
| PGLYRP2     | one_stearoyl_GPC           | 0.37                   | 5.41                | 0.37                    | 4.91                 | 10.32                   |
| PTGDS       | X_11510                    | 0.40                   | 6.53                | 0.32                    | 3.79                 | 10.32                   |
| REG1A       | mannitol                   | 0.37                   | 5.43                | 0.37                    | 4.88                 | 10.31                   |
| VTN         | X_11334                    | -0.31                  | 4.06                | -0.42                   | 6.24                 | 10.30                   |
| APOH        | X_10395                    | 0.41                   | 6.88                | 0.31                    | 3.42                 | 10.30                   |
| SERPINA3    | tryptophan                 | -0.34                  | 4.68                | -0.40                   | 5.62                 | 10.30                   |
| AZGP1       | X_04499                    | 0.34                   | 4.64                | 0.40                    | 5.66                 | 10.30                   |
| ORM1        | one_methylimidazoleacetate | 0.33                   | 4.39                | 0.41                    | 5.90                 | 10.29                   |
| AZGP1       | X_04629                    | 0.40                   | 6.27                | 0.33                    | 4.01                 | 10.29                   |
| KNG1        | glutamate                  | 0.30                   | 3.78                | 0.43                    | 6.51                 | 10.29                   |
| COL11A2     | one_linoleoyl_GPC          | 0.33                   | 4.32                | 0.41                    | 5.96                 | 10.29                   |
| GPX3        | X_10359                    | -0.36                  | 5.20                | -0.38                   | 5.08                 | 10.28                   |
| GPX3        | threonine                  | 0.47                   | 8.73                | 0.19                    | 1.55                 | 10.28                   |
| S100A9      | androsterone_sulfate       | 0.42                   | 6.91                | 0.30                    | 3.36                 | 10.27                   |
| AMBP        | threonine                  | -0.40                  | 6.52                | -0.32                   | 3.75                 | 10.27                   |
| FCGBP       | X_03056                    | 0.30                   | 3.76                | 0.43                    | 6.50                 | 10.26                   |
| CD14        | one_stearoyl_GPC           | -0.25                  | 2.78                | -0.46                   | 7.48                 | 10.26                   |
| MB          | HPLA                       | 0.28                   | 3.35                | 0.44                    | 6.91                 | 10.26                   |
| SPINK1      | X_12802                    | 0.35                   | 4.82                | 0.39                    | 5.44                 | 10.26                   |
| SERPINC1    | alpha_hydroxyisovalerate   | -0.42                  | 7.17                | -0.29                   | 3.09                 | 10.26                   |
| F12         | X_12510                    | 0.33                   | 4.45                | 0.41                    | 5.80                 | 10.25                   |
| PLG         | one_eicosatrienoyl_GPC     | 0.22                   | 2.16                | 0.48                    | 8.09                 | 10.25                   |
| AZGP1       | X_11261                    | 0.45                   | 8.09                | 0.23                    | 2.15                 | 10.24                   |
| SPINK1      | X_03951                    | 0.36                   | 5.32                | 0.37                    | 4.92                 | 10.24                   |
| AMBP        | tryptophan                 | -0.40                  | 6.38                | -0.33                   | 3.86                 | 10.24                   |
| VTN         | X_12206                    | -0.40                  | 6.41                | -0.33                   | 3.82                 | 10.24                   |
| GPX3        | glycochenodeoxycholate     | 0.42                   | 6.95                | 0.30                    | 3.28                 | 10.23                   |
| ORM1        | X_10395                    | -0.33                  | 4.34                | -0.41                   | 5.89                 | 10.23                   |
| RNASE1      | X_11838                    | 0.31                   | 3.84                | 0.43                    | 6.38                 | 10.22                   |
| B2M         | malate                     | 0.38                   | 5.71                | 0.36                    | 4.51                 | 10.22                   |
| APOC2       | X_06346                    | 0.35                   | 4.92                | 0.39                    | 5.30                 | 10.22                   |
| LYZ         | X_12100                    | 0.49                   | 9.58                | 0.10                    | 0.63                 | 10.22                   |
| SAA1        | X_05522                    | 0.42                   | 6.98                | 0.30                    | 3.23                 | 10.21                   |
| PON1        | X_13553                    | -0.32                  | 4.16                | -0.41                   | 6.06                 | 10.21                   |
| LCN2        | X_12644                    | -0.28                  | 3.26                | -0.44                   | 6.94                 | 10.20                   |
| AZGP1       | isobutyrylcarnitine        | 0.41                   | 6.70                | 0.31                    | 3.50                 | 10.20                   |
| LGALS3BP    | glycocholate               | 0.36                   | 5.34                | 0.37                    | 4.84                 | 10.18                   |
| LCN2        | myo_inositol               | 0.37                   | 5.39                | 0.37                    | 4.79                 | 10.18                   |
| PTGDS       | deoxycarnitine             | 0.43                   | 7.29                | 0.28                    | 2.89                 | 10.18                   |
| ORM2        | seven_HOCA                 | -0.40                  | 6.25                | -0.33                   | 3.93                 | 10.18                   |
| S100A9      | X_04499                    | 0.38                   | 5.93                | 0.34                    | 4.24                 | 10.17                   |
| COL11A2     | tryptophan                 | 0.30                   | 3.83                | 0.42                    | 6.34                 | 10.17                   |
| CFHR2       | X_12095                    | 0.35                   | 4.87                | 0.39                    | 5.29                 | 10.17                   |
| C1QA        | SDMA                       | 0.31                   | 3.93                | 0.42                    | 6.24                 | 10.16                   |
| C1QB        | taurocholate               | 0.44                   | 7.69                | 0.25                    | 2.48                 | 10.16                   |
| RBP4        | phenol_sulfate             | 0.33                   | 4.45                | 0.40                    | 5.69                 | 10.14                   |
| REG1A       | hippurate                  | 0.32                   | 4.09                | 0.41                    | 6.05                 | 10.14                   |
| FCGBP       | N_acetylalanine            | 0.28                   | 3.32                | 0.44                    | 6.82                 | 10.14                   |
| SERPINA3    | X_03056                    | 0.42                   | 7.16                | 0.28                    | 2.97                 | 10.13                   |
| PRDX2       | AMP                        | 0.30                   | 3.71                | 0.43                    | 6.42                 | 10.13                   |

| gene symbol | metabolite                      | t0 Pearson Correlation | t0 NegLog10 p-value | t24 Pearson Correlation | t24 NegLog10 p-value | Sum of NegLog10 p-value |
|-------------|---------------------------------|------------------------|---------------------|-------------------------|----------------------|-------------------------|
| IGFBP4      | X_12688                         | 0.43                   | 7.44                | 0.27                    | 2.69                 | 10.13                   |
| CFHR2       | prolylhydroxyproline            | 0.38                   | 5.75                | 0.35                    | 4.37                 | 10.12                   |
| FABP1       | pipecolate                      | 0.29                   | 3.39                | 0.44                    | 6.73                 | 10.12                   |
| CST3        | p_cresol_sulfate                | 0.31                   | 3.95                | 0.42                    | 6.16                 | 10.12                   |
| APOC3       | glycerol_3_phosphate            | 0.41                   | 6.60                | 0.31                    | 3.51                 | 10.11                   |
| APOC1       | one_palmitoylglycerol           | 0.45                   | 8.30                | 0.21                    | 1.80                 | 10.10                   |
| MB          | X_13553                         | 0.37                   | 5.51                | 0.36                    | 4.57                 | 10.08                   |
| IGFBP4      | X_10266                         | 0.42                   | 7.10                | 0.28                    | 2.98                 | 10.08                   |
| RBP4        | four_vinylphenol_sulfate        | 0.33                   | 4.40                | 0.40                    | 5.68                 | 10.08                   |
| VSIG4       | X_11687                         | 0.40                   | 6.33                | 0.32                    | 3.75                 | 10.08                   |
| APOH        | X_11444                         | 0.38                   | 5.78                | 0.35                    | 4.30                 | 10.08                   |
| RNASE1      | four_acetaminophen_sulfate      | 0.27                   | 3.07                | 0.45                    | 7.00                 | 10.07                   |
| GSN         | X_09789                         | 0.34                   | 4.69                | 0.39                    | 5.38                 | 10.07                   |
| RBP4        | four_acetamidobutanoate         | 0.28                   | 3.25                | 0.44                    | 6.81                 | 10.05                   |
| LYZ         | phenol_sulfate                  | 0.47                   | 8.73                | 0.17                    | 1.32                 | 10.05                   |
| CRP         | one_arachidoyl_GPE              | -0.36                  | 5.27                | -0.37                   | 4.77                 | 10.05                   |
| CES1        | phenylalanine                   | 0.12                   | 0.84                | 0.51                    | 9.21                 | 10.05                   |
| SERPINA3    | androsterone_sulfate            | 0.38                   | 5.92                | 0.34                    | 4.13                 | 10.04                   |
| AHSG        | X_04499                         | -0.39                  | 6.02                | -0.33                   | 4.03                 | 10.04                   |
| SPINK1      | N_acetylalanine                 | 0.38                   | 5.72                | 0.35                    | 4.32                 | 10.04                   |
| VASN        | X_12117                         | 0.36                   | 5.29                | 0.37                    | 4.75                 | 10.04                   |
| REG1A       | HPLA                            | 0.34                   | 4.80                | 0.38                    | 5.24                 | 10.04                   |
| IGFBP4      | X_13553                         | 0.41                   | 6.70                | 0.30                    | 3.34                 | 10.04                   |
| AFM         | glutamate                       | 0.35                   | 4.99                | 0.38                    | 5.05                 | 10.04                   |
| PLG         | X_10395                         | 0.43                   | 7.44                | 0.26                    | 2.59                 | 10.03                   |
| APOH        | alpha_hydroxyisovalerate        | -0.39                  | 6.13                | -0.33                   | 3.90                 | 10.03                   |
| CFD         | X_05522                         | 0.26                   | 2.95                | 0.45                    | 7.07                 | 10.03                   |
| FCGBP       | one_palmitoyl_GPC               | -0.25                  | 2.71                | -0.45                   | 7.31                 | 10.03                   |
| APCS        | myristoleate                    | -0.39                  | 6.15                | -0.33                   | 3.88                 | 10.02                   |
| LBP         | three_hydroxy_2_ethylpropionate | 0.42                   | 6.93                | 0.29                    | 3.09                 | 10.02                   |
| SAA3P       | threonine                       | -0.33                  | 4.37                | -0.40                   | 5.65                 | 10.02                   |
| CD14        | one_palmitoyl_GPC               | -0.31                  | 4.02                | -0.41                   | 5.99                 | 10.02                   |
| APCS        | pipecolate                      | -0.41                  | 6.66                | -0.30                   | 3.35                 | 10.01                   |
| PON1        | N_acetylalanine                 | -0.32                  | 4.10                | -0.41                   | 5.91                 | 10.01                   |
| AZGP1       | X_12742                         | 0.37                   | 5.44                | 0.36                    | 4.57                 | 10.01                   |
| REG1A       | X_10266                         | 0.32                   | 4.29                | 0.40                    | 5.71                 | 10.01                   |
| VTN         | X_11429                         | -0.30                  | 3.77                | -0.42                   | 6.24                 | 10.01                   |
| VASN        | N_acetylthreonine               | 0.34                   | 4.71                | 0.39                    | 5.29                 | 10.00                   |
| SAA1        | X_03056                         | 0.44                   | 7.74                | 0.24                    | 2.26                 | 10.00                   |
| AZGP1       | hippurate                       | 0.39                   | 6.14                | 0.33                    | 3.85                 | 10.00                   |
| HRG         | hexanoylcarnitine               | -0.39                  | 6.25                | -0.32                   | 3.75                 | 9.99                    |
| VSIG4       | malate                          | 0.36                   | 5.19                | 0.37                    | 4.80                 | 9.99                    |
| ITIH2       | X_03056                         | -0.33                  | 4.47                | -0.40                   | 5.52                 | 9.99                    |
| CFD         | citrulline                      | 0.46                   | 8.58                | 0.18                    | 1.40                 | 9.98                    |
| REG1A       | threitol                        | 0.28                   | 3.28                | 0.44                    | 6.70                 | 9.98                    |
| APOH        | taurochenodeoxycholate          | -0.33                  | 4.36                | -0.40                   | 5.62                 | 9.98                    |
| RBP4        | X_11593                         | 0.26                   | 2.79                | 0.45                    | 7.18                 | 9.97                    |
| REG1A       | X_12100                         | 0.36                   | 5.13                | 0.37                    | 4.83                 | 9.96                    |
| VTN         | X_11687                         | -0.31                  | 4.01                | -0.41                   | 5.95                 | 9.96                    |
| APOA2       | HPLA                            | -0.43                  | 7.47                | -0.26                   | 2.49                 | 9.96                    |
| S100A8      | octanoylcarnitine               | 0.41                   | 6.64                | 0.30                    | 3.32                 | 9.96                    |
| CD14        | X_10483                         | 0.33                   | 4.49                | 0.39                    | 5.47                 | 9.96                    |
| ITIH2       | N_acetylalanine                 | -0.31                  | 4.06                | -0.41                   | 5.89                 | 9.95                    |
| LBP         | X_11302                         | 0.30                   | 3.62                | 0.42                    | 6.33                 | 9.95                    |
| REG1A       | X_12794                         | 0.31                   | 3.87                | 0.42                    | 6.09                 | 9.95                    |
| CFD         | myo_inositol                    | 0.33                   | 4.31                | 0.40                    | 5.64                 | 9.95                    |

| gene symbol | metabolite                  | t0 Pearson Correlation | t0 NegLog10 p-value | t24 Pearson Correlation | t24 NegLog10 p-value | Sum of NegLog10 p-value |
|-------------|-----------------------------|------------------------|---------------------|-------------------------|----------------------|-------------------------|
| MB          | two_methylbutyroylcarnitine | 0.45                   | 8.30                | 0.20                    | 1.63                 | 9.94                    |
| REG1A       | X_12095                     | 0.30                   | 3.75                | 0.42                    | 6.19                 | 9.93                    |
| APOA4       | X_05426                     | 0.38                   | 5.72                | 0.34                    | 4.21                 | 9.93                    |
| TIMP1       | two_palmitoyl_GPC           | -0.27                  | 3.01                | -0.44                   | 6.91                 | 9.93                    |
| RNASE1      | three_methylhistidine       | 0.40                   | 6.51                | 0.31                    | 3.41                 | 9.93                    |
| LUM         | three_methylhistidine       | 0.44                   | 7.79                | 0.23                    | 2.14                 | 9.93                    |
| SERPINA3    | glutamate                   | -0.40                  | 6.32                | -0.31                   | 3.60                 | 9.92                    |
| SPINK1      | X_12742                     | 0.35                   | 4.86                | 0.38                    | 5.06                 | 9.92                    |
| SERPINA3    | X_10395                     | -0.45                  | 7.95                | -0.22                   | 1.96                 | 9.91                    |
| RBP4        | indolelactate               | 0.39                   | 6.18                | 0.32                    | 3.73                 | 9.91                    |
| VSIG4       | X_04499                     | 0.40                   | 6.34                | 0.31                    | 3.58                 | 9.91                    |
| SERPINA3    | one_arachidoyl_GPE          | -0.38                  | 5.85                | -0.34                   | 4.06                 | 9.91                    |
| LUM         | X_12850                     | 0.31                   | 3.88                | 0.41                    | 6.03                 | 9.91                    |
| A1BG        | X_03056                     | -0.42                  | 7.13                | -0.27                   | 2.78                 | 9.91                    |
| AZGP1       | one_methylimidazoleacetate  | 0.35                   | 4.87                | 0.38                    | 5.03                 | 9.90                    |
| PLG         | SDMA                        | -0.19                  | 1.65                | -0.48                   | 8.26                 | 9.90                    |
| RBP4        | N2_N2_dimethylguanosine     | 0.26                   | 2.79                | 0.45                    | 7.12                 | 9.90                    |
| LYZ         | X_10266                     | 0.48                   | 9.31                | 0.10                    | 0.59                 | 9.90                    |
| CD14        | X_12100                     | 0.28                   | 3.36                | 0.43                    | 6.53                 | 9.90                    |
| CFD         | X_12206                     | 0.38                   | 5.67                | 0.34                    | 4.22                 | 9.89                    |
| ADIPOQ      | X_12095                     | 0.39                   | 6.23                | 0.32                    | 3.65                 | 9.89                    |
| CST3        | four_methyl_2_oxopentanoate | -0.38                  | 5.90                | -0.33                   | 3.99                 | 9.89                    |
| CFHR2       | gluconate                   | 0.43                   | 7.50                | 0.25                    | 2.38                 | 9.88                    |
| TF          | X_12794                     | -0.33                  | 4.36                | -0.40                   | 5.52                 | 9.88                    |
| VSIG4       | X_12458                     | 0.32                   | 4.09                | 0.40                    | 5.79                 | 9.88                    |
| BAI2        | one_palmitoyl_GPC           | -0.31                  | 3.85                | -0.41                   | 6.02                 | 9.87                    |
| LUM         | taurochenodeoxycholate      | 0.34                   | 4.78                | 0.38                    | 5.09                 | 9.87                    |
| CFHR2       | X_12749                     | 0.32                   | 4.25                | 0.40                    | 5.62                 | 9.87                    |
| S100A9      | hydroxyisovaleroylcarnitine | 0.41                   | 6.64                | 0.30                    | 3.23                 | 9.86                    |
| VWF         | pipecolate                  | 0.36                   | 5.16                | 0.36                    | 4.70                 | 9.86                    |
| VWF         | X_06346                     | -0.37                  | 5.64                | -0.34                   | 4.22                 | 9.86                    |
| HRG         | HPLA                        | -0.40                  | 6.29                | -0.31                   | 3.56                 | 9.86                    |
| VWF         | X_14658                     | 0.37                   | 5.46                | 0.35                    | 4.40                 | 9.86                    |
| CST3        | malate                      | 0.39                   | 5.96                | 0.33                    | 3.88                 | 9.85                    |
| AZGP1       | X_11315                     | -0.36                  | 5.24                | -0.36                   | 4.60                 | 9.84                    |
| C4BPA       | myristoleate                | -0.40                  | 6.43                | -0.31                   | 3.41                 | 9.84                    |
| APOC3       | threitol                    | 0.34                   | 4.59                | 0.38                    | 5.24                 | 9.84                    |
| SERPINA6    | one_stearoyl_GPC            | -0.36                  | 5.23                | -0.36                   | 4.60                 | 9.83                    |
| COL11A2     | X_11452                     | 0.27                   | 3.13                | 0.44                    | 6.70                 | 9.83                    |
| SAA3P       | androsterone_sulfate        | 0.38                   | 5.79                | 0.34                    | 4.04                 | 9.83                    |
| AFM         | X_04499                     | -0.40                  | 6.43                | -0.30                   | 3.39                 | 9.83                    |
| DEFA1       | X_10483                     | 0.23                   | 2.25                | 0.46                    | 7.58                 | 9.82                    |
| PGLYRP2     | X_11786                     | 0.41                   | 6.63                | 0.29                    | 3.19                 | 9.82                    |
| ORM1        | one_five_anhydroglucitol    | -0.28                  | 3.28                | -0.43                   | 6.54                 | 9.82                    |
| GPX3        | gulono_1_4_lactone          | -0.39                  | 6.01                | -0.32                   | 3.81                 | 9.82                    |
| APOC2       | X_10510                     | 0.37                   | 5.37                | 0.35                    | 4.45                 | 9.82                    |
| CFHR2       | X_04629                     | 0.34                   | 4.80                | 0.38                    | 5.02                 | 9.82                    |
| GPX3        | threonate                   | -0.39                  | 5.99                | -0.33                   | 3.82                 | 9.82                    |
| HPX         | X_11510                     | -0.35                  | 4.86                | -0.37                   | 4.96                 | 9.82                    |
| SERPIND1    | pipecolate                  | -0.34                  | 4.57                | -0.38                   | 5.25                 | 9.81                    |
| CFHR2       | xylose                      | 0.39                   | 6.11                | 0.32                    | 3.70                 | 9.81                    |
| APOC2       | X_10744                     | 0.38                   | 5.66                | 0.34                    | 4.14                 | 9.80                    |
| F12         | one_palmitoleoyl_GPC        | 0.43                   | 7.35                | 0.25                    | 2.45                 | 9.80                    |
| COL11A2     | one_stearoyl_GPC            | 0.32                   | 4.25                | 0.40                    | 5.55                 | 9.80                    |
| RNASE1      | citrulline                  | 0.20                   | 1.84                | 0.47                    | 7.95                 | 9.79                    |
| SERPINA6    | X_03056                     | 0.36                   | 5.28                | 0.36                    | 4.51                 | 9.78                    |



| gene symbol | metabolite                 | t0 Pearson Correlation | t0 NegLog10 p-value | t24 Pearson Correlation | t24 NegLog10 p-value | Sum of NegLog10 p-value |
|-------------|----------------------------|------------------------|---------------------|-------------------------|----------------------|-------------------------|
| APCS        | taurocholate               | -0.41                  | 6.65                | -0.29                   | 3.12                 | 9.78                    |
| CST3        | one_palmitoyl_GPC          | -0.32                  | 4.28                | -0.39                   | 5.49                 | 9.78                    |
| RBP4        | glutamate                  | 0.36                   | 5.11                | 0.36                    | 4.66                 | 9.77                    |
| VASN        | X_10483                    | 0.33                   | 4.43                | 0.39                    | 5.34                 | 9.77                    |
| AFM         | two_palmitoyl_GPC          | 0.38                   | 5.77                | 0.33                    | 4.00                 | 9.77                    |
| CFD         | X_11261                    | 0.34                   | 4.72                | 0.38                    | 5.04                 | 9.76                    |
| RBMX        | glycochenodeoxycholate     | 0.43                   | 7.29                | 0.25                    | 2.48                 | 9.76                    |
| AZGP1       | X_12101                    | 0.36                   | 5.13                | 0.36                    | 4.63                 | 9.76                    |
| PTGDS       | CMPF                       | 0.28                   | 3.25                | 0.43                    | 6.51                 | 9.76                    |
| CD14        | one_methylimidazoleacetate | 0.29                   | 3.42                | 0.42                    | 6.34                 | 9.76                    |
| SAA3P       | palmitoylcarnitine         | -0.39                  | 6.16                | -0.31                   | 3.60                 | 9.76                    |
| APOC3       | X_12844                    | 0.31                   | 3.96                | 0.40                    | 5.79                 | 9.76                    |
| SERPIND1    | glycochenodeoxycholate     | -0.40                  | 6.45                | -0.30                   | 3.30                 | 9.75                    |
| SEPP1       | one_arachidoyl_GPE         | 0.43                   | 7.27                | 0.26                    | 2.48                 | 9.75                    |
| ORM1        | creatine                   | 0.37                   | 5.44                | 0.35                    | 4.30                 | 9.75                    |
| AZGP1       | choline                    | 0.40                   | 6.42                | 0.30                    | 3.32                 | 9.73                    |
| RBP4        | erythritol                 | 0.28                   | 3.24                | 0.43                    | 6.50                 | 9.73                    |
| ORM1        | erythronate                | 0.35                   | 4.94                | 0.37                    | 4.79                 | 9.73                    |
| ORM2        | one_methylimidazoleacetate | 0.31                   | 3.86                | 0.41                    | 5.87                 | 9.73                    |
| CST3        | X_11437                    | 0.30                   | 3.74                | 0.41                    | 5.98                 | 9.72                    |
| VASN        | X_12802                    | 0.37                   | 5.45                | 0.35                    | 4.26                 | 9.72                    |
| LUM         | X_09789                    | 0.39                   | 6.20                | 0.31                    | 3.51                 | 9.71                    |
| RNASE1      | HPLA                       | 0.31                   | 4.02                | 0.40                    | 5.68                 | 9.70                    |
| VWF         | X_04357                    | 0.42                   | 6.96                | 0.27                    | 2.74                 | 9.70                    |
| S100A8      | X_04495                    | 0.38                   | 5.69                | 0.33                    | 4.00                 | 9.70                    |
| CFD         | X_09789                    | 0.41                   | 6.82                | 0.28                    | 2.88                 | 9.69                    |
| FCGBP       | X_04499                    | 0.36                   | 5.19                | 0.36                    | 4.50                 | 9.69                    |
| VWF         | one_linoleoyl_GPC          | -0.33                  | 4.48                | -0.38                   | 5.21                 | 9.69                    |
| SERPIND1    | X_13553                    | -0.33                  | 4.44                | -0.39                   | 5.25                 | 9.69                    |
| TF          | two_palmitoyl_GPC          | 0.33                   | 4.35                | 0.39                    | 5.34                 | 9.69                    |
| LGALS3BP    | X_12786                    | 0.38                   | 5.80                | 0.33                    | 3.89                 | 9.68                    |
| SAA4        | X_08402                    | 0.39                   | 5.95                | 0.32                    | 3.73                 | 9.68                    |
| CD14        | one_arachidoyl_GPC         | -0.24                  | 2.48                | -0.45                   | 7.20                 | 9.68                    |
| AMBP        | histidine                  | -0.35                  | 5.05                | -0.36                   | 4.63                 | 9.68                    |
| ITIH3       | mannose                    | 0.26                   | 2.87                | 0.44                    | 6.81                 | 9.68                    |
| CFHR2       | X_12101                    | 0.37                   | 5.53                | 0.34                    | 4.14                 | 9.67                    |
| VSIG4       | N2_N2_dimethylguanosine    | 0.39                   | 6.15                | 0.31                    | 3.52                 | 9.67                    |
| GPX3        | bilirubin                  | 0.41                   | 6.67                | 0.28                    | 3.00                 | 9.67                    |
| CST3        | hexanoylcarnitine          | 0.37                   | 5.49                | 0.34                    | 4.18                 | 9.67                    |
| DEFA1       | X_12802                    | 0.24                   | 2.57                | 0.45                    | 7.09                 | 9.66                    |
| VSIG4       | X_04498                    | 0.38                   | 5.73                | 0.33                    | 3.94                 | 9.66                    |
| SAA1        | proline                    | -0.33                  | 4.52                | -0.38                   | 5.14                 | 9.66                    |
| AMBP        | X_04595                    | 0.32                   | 4.21                | 0.39                    | 5.45                 | 9.66                    |
| FABP1       | gamma_glutamyltyrosine     | 0.29                   | 3.53                | 0.42                    | 6.12                 | 9.66                    |
| VASN        | threitol                   | 0.35                   | 5.04                | 0.36                    | 4.60                 | 9.65                    |
| SERPIND1    | SDMA                       | -0.38                  | 5.72                | -0.33                   | 3.92                 | 9.64                    |
| CRP         | X_11786                    | -0.31                  | 3.88                | -0.40                   | 5.76                 | 9.64                    |
| C1QC        | SDMA                       | 0.26                   | 2.91                | 0.44                    | 6.72                 | 9.63                    |
| DEFA1       | X_11687                    | 0.27                   | 3.01                | 0.43                    | 6.62                 | 9.63                    |
| RBP4        | X_04504                    | 0.30                   | 3.61                | 0.41                    | 6.02                 | 9.62                    |
| SAA3P       | X_12510                    | -0.34                  | 4.79                | -0.37                   | 4.83                 | 9.62                    |
| PGLYRP2     | X_12794                    | -0.35                  | 5.05                | -0.36                   | 4.58                 | 9.62                    |
| AZGP1       | N_acetylglycine            | 0.34                   | 4.76                | 0.37                    | 4.86                 | 9.62                    |
| ORM1        | X_11593                    | 0.33                   | 4.55                | 0.38                    | 5.07                 | 9.62                    |
| ULK4        | methionine                 | -0.36                  | 5.23                | -0.35                   | 4.39                 | 9.62                    |
| LCN2        | X_12611                    | 0.39                   | 6.02                | 0.31                    | 3.59                 | 9.62                    |

| gene symbol | metabolite                       | t0 Pearson Correlation | t0 NegLog10 p-value | t24 Pearson Correlation | t24 NegLog10 p-value | Sum of NegLog10 p-value |
|-------------|----------------------------------|------------------------|---------------------|-------------------------|----------------------|-------------------------|
| CST3        | one_eicosatrienoyl_GPC           | -0.31                  | 4.00                | -0.40                   | 5.61                 | 9.61                    |
| PON1        | X_04498                          | -0.33                  | 4.38                | -0.38                   | 5.23                 | 9.61                    |
| C7          | malate                           | 0.34                   | 4.77                | 0.37                    | 4.84                 | 9.61                    |
| REG1A       | X_12099                          | 0.35                   | 5.01                | 0.36                    | 4.59                 | 9.60                    |
| S100A9      | one_linoleoyl_GPC                | -0.26                  | 2.80                | -0.44                   | 6.80                 | 9.60                    |
| CLU         | one_palmitoyl_GPC                | 0.30                   | 3.70                | 0.41                    | 5.90                 | 9.60                    |
| ICAM2       | methionine                       | 0.40                   | 6.47                | 0.29                    | 3.13                 | 9.60                    |
| GPX3        | X_11826                          | -0.32                  | 4.16                | -0.39                   | 5.44                 | 9.60                    |
| TTR         | X_06346                          | 0.41                   | 6.66                | 0.28                    | 2.93                 | 9.59                    |
| RBP4        | xylose                           | 0.22                   | 2.18                | 0.46                    | 7.42                 | 9.59                    |
| LUM         | four_vinylphenol_sulfate         | 0.36                   | 5.33                | 0.34                    | 4.25                 | 9.58                    |
| RBP4        | allantoin                        | 0.31                   | 4.05                | 0.40                    | 5.53                 | 9.58                    |
| HPR         | malate                           | -0.28                  | 3.36                | -0.42                   | 6.22                 | 9.58                    |
| RBP4        | X_10266                          | 0.35                   | 5.07                | 0.36                    | 4.50                 | 9.57                    |
| AZGP1       | X_12688                          | 0.37                   | 5.54                | 0.33                    | 4.02                 | 9.56                    |
| SERPINA3    | X_12510                          | -0.36                  | 5.11                | -0.35                   | 4.45                 | 9.56                    |
| DEFA1       | N2_N2_dimethylguanosine          | 0.22                   | 2.15                | 0.46                    | 7.41                 | 9.56                    |
| VSIG4       | X_11429                          | 0.42                   | 7.03                | 0.26                    | 2.53                 | 9.55                    |
| AZGP1       | X_10483                          | 0.36                   | 5.26                | 0.35                    | 4.29                 | 9.55                    |
| LCN2        | X_05522                          | 0.32                   | 4.25                | 0.39                    | 5.30                 | 9.55                    |
| APOH        | X_12104                          | 0.38                   | 5.83                | 0.32                    | 3.71                 | 9.54                    |
| LUM         | seven_HOCA                       | 0.26                   | 2.89                | 0.43                    | 6.65                 | 9.53                    |
| AHSG        | one_oleoyl_GPC                   | 0.32                   | 4.17                | 0.39                    | 5.36                 | 9.53                    |
| RBP4        | X_12749                          | 0.29                   | 3.46                | 0.41                    | 6.06                 | 9.52                    |
| CST3        | X_12850                          | 0.45                   | 8.01                | 0.19                    | 1.51                 | 9.51                    |
| S100A8      | beta_hydroxyisovalerate          | 0.40                   | 6.43                | 0.29                    | 3.08                 | 9.51                    |
| FABP1       | glycochenodeoxycholate           | 0.19                   | 1.69                | 0.47                    | 7.82                 | 9.51                    |
| LUM         | indolelactate                    | 0.34                   | 4.78                | 0.36                    | 4.73                 | 9.51                    |
| AFM         | piperine                         | 0.34                   | 4.80                | 0.36                    | 4.71                 | 9.51                    |
| SHBG        | X_11244                          | -0.31                  | 3.94                | -0.40                   | 5.57                 | 9.51                    |
| ADIPOQ      | quininate                        | 0.35                   | 5.01                | 0.35                    | 4.50                 | 9.51                    |
| SAA1        | two_methoxyacetaminophen_sulfate | 0.22                   | 2.16                | 0.46                    | 7.34                 | 9.50                    |
| CD14        | pseudouridine                    | 0.32                   | 4.21                | 0.39                    | 5.29                 | 9.50                    |
| CFD         | X_12794                          | 0.23                   | 2.26                | 0.45                    | 7.24                 | 9.50                    |
| DEFA1       | X_12860                          | 0.31                   | 3.84                | 0.40                    | 5.65                 | 9.50                    |
| B2M         | kynurenine                       | 0.32                   | 4.12                | 0.39                    | 5.37                 | 9.49                    |
| VSIG4       | N_acetylaniline                  | 0.39                   | 6.13                | 0.30                    | 3.35                 | 9.48                    |
| CFHR2       | X_12844                          | 0.30                   | 3.80                | 0.40                    | 5.68                 | 9.48                    |
| B2M         | HPLA                             | 0.35                   | 4.94                | 0.36                    | 4.54                 | 9.47                    |
| CES1        | histidine                        | 0.36                   | 5.12                | 0.35                    | 4.35                 | 9.47                    |
| CFD         | catechol_sulfate                 | 0.40                   | 6.33                | 0.29                    | 3.14                 | 9.47                    |
| CFD         | X_04499                          | 0.25                   | 2.75                | 0.44                    | 6.71                 | 9.47                    |
| AMBP        | isobutyrylcarnitine              | 0.31                   | 3.94                | 0.39                    | 5.52                 | 9.46                    |
| CFD         | indolelactate                    | 0.41                   | 6.75                | 0.27                    | 2.71                 | 9.46                    |
| TF          | X_03056                          | -0.35                  | 4.95                | -0.36                   | 4.51                 | 9.46                    |
| FCGBP       | one_stearoyl_GPC                 | -0.16                  | 1.27                | -0.48                   | 8.17                 | 9.45                    |
| C7          | pipecolate                       | 0.35                   | 4.88                | 0.36                    | 4.56                 | 9.44                    |
| HRG         | one_palmitoyl_GPC                | 0.34                   | 4.73                | 0.36                    | 4.70                 | 9.44                    |
| REG1A       | X_12742                          | 0.30                   | 3.80                | 0.40                    | 5.63                 | 9.43                    |
| LBP         | X_12644                          | -0.32                  | 4.22                | -0.38                   | 5.21                 | 9.43                    |
| S100A9      | one_oleoyl_GPC                   | -0.21                  | 2.08                | -0.46                   | 7.35                 | 9.43                    |
| LUM         | citrate                          | 0.39                   | 6.02                | 0.31                    | 3.41                 | 9.43                    |
| VSIG4       | N_acetylneuraminate              | 0.39                   | 6.23                | 0.29                    | 3.20                 | 9.42                    |
| APOL1       | X_04499                          | -0.44                  | 7.85                | -0.19                   | 1.57                 | 9.42                    |
| GPX3        | X_04507                          | -0.35                  | 5.00                | -0.35                   | 4.42                 | 9.42                    |

| gene symbol | metabolite                       | t0 Pearson Correlation | t0 NegLog10 p-value | t24 Pearson Correlation | t24 NegLog10 p-value | Sum of NegLog10 p-value |
|-------------|----------------------------------|------------------------|---------------------|-------------------------|----------------------|-------------------------|
| LBP         | palmitoylcarnitine               | -0.40                  | 6.33                | -0.29                   | 3.09                 | 9.42                    |
| C4BPA       | seven_HOCA                       | -0.44                  | 7.67                | -0.21                   | 1.75                 | 9.42                    |
| COPB1       | X_11538                          | 0.27                   | 3.12                | 0.42                    | 6.29                 | 9.41                    |
| AZGP1       | sucrose                          | 0.30                   | 3.66                | 0.40                    | 5.75                 | 9.41                    |
| SERPINA3    | butyrylcarnitine                 | 0.38                   | 5.88                | 0.31                    | 3.53                 | 9.41                    |
| LYZ         | X_12104                          | 0.47                   | 8.90                | 0.09                    | 0.51                 | 9.41                    |
| HRG         | one_methyladenosine              | -0.41                  | 6.64                | -0.27                   | 2.77                 | 9.41                    |
| CFHR2       | X_12794                          | 0.36                   | 5.10                | 0.35                    | 4.31                 | 9.41                    |
| VWF         | X_12786                          | 0.35                   | 4.92                | 0.35                    | 4.49                 | 9.41                    |
| SERPINA3    | citrulline                       | -0.38                  | 5.76                | -0.32                   | 3.64                 | 9.41                    |
| RNASE1      | two_methylbutyroylcarnitine      | 0.29                   | 3.45                | 0.41                    | 5.95                 | 9.41                    |
| REG1A       | myo_inositol                     | 0.30                   | 3.79                | 0.40                    | 5.61                 | 9.40                    |
| ECM1        | betaine                          | 0.39                   | 6.12                | 0.30                    | 3.28                 | 9.40                    |
| TAGLN2      | AMP                              | 0.37                   | 5.54                | 0.33                    | 3.86                 | 9.40                    |
| ORM2        | glutamine                        | -0.37                  | 5.50                | -0.33                   | 3.90                 | 9.40                    |
| ORM1        | N_acetylneuraminate              | 0.37                   | 5.41                | 0.33                    | 3.99                 | 9.40                    |
| SAA3P       | two_methoxyacetaminophen_sulfate | 0.21                   | 2.06                | 0.46                    | 7.34                 | 9.40                    |
| FCGBP       | X_10483                          | 0.33                   | 4.55                | 0.37                    | 4.84                 | 9.40                    |
| TF          | X_11880                          | 0.25                   | 2.69                | 0.44                    | 6.71                 | 9.39                    |
| APOC3       | X_04507                          | 0.33                   | 4.43                | 0.37                    | 4.96                 | 9.39                    |
| S100A8      | X_12458                          | 0.41                   | 6.63                | 0.27                    | 2.76                 | 9.39                    |
| TIMP1       | three_hydroxy_2_ethylpropionate  | 0.28                   | 3.33                | 0.41                    | 6.06                 | 9.39                    |
| APOA2       | X_04499                          | -0.38                  | 5.79                | -0.31                   | 3.60                 | 9.39                    |
| LCN2        | two_palmitoyl_GPC                | -0.23                  | 2.33                | -0.45                   | 7.05                 | 9.38                    |
| PTGDS       | tiglyl_carnitine                 | 0.33                   | 4.39                | 0.38                    | 4.99                 | 9.38                    |
| GPX3        | X_11261                          | -0.42                  | 7.08                | -0.24                   | 2.30                 | 9.38                    |
| AMBP        | tyrosine                         | -0.40                  | 6.53                | -0.28                   | 2.85                 | 9.38                    |
| SAA3P       | X_11593                          | 0.39                   | 6.08                | 0.30                    | 3.29                 | 9.37                    |
| LCN2        | glutaroylcarnitine               | 0.34                   | 4.78                | 0.36                    | 4.60                 | 9.37                    |
| ORM1        | X_04507                          | 0.35                   | 4.83                | 0.36                    | 4.54                 | 9.37                    |
| MB          | hexanoylcarnitine                | 0.29                   | 3.41                | 0.41                    | 5.96                 | 9.37                    |
| KLKB1       | one_palmitoyl_GPC                | 0.41                   | 6.64                | 0.27                    | 2.73                 | 9.37                    |
| CFHR2       | four_acetamidobutanoate          | 0.37                   | 5.59                | 0.32                    | 3.78                 | 9.36                    |
| C1QC        | glycochenodeoxycholate           | 0.38                   | 5.87                | 0.31                    | 3.49                 | 9.35                    |
| AMBP        | citrulline                       | 0.24                   | 2.56                | 0.44                    | 6.79                 | 9.35                    |
| VTN         | erythritol                       | -0.32                  | 4.21                | -0.38                   | 5.14                 | 9.35                    |
| IGFBP4      | arabinose                        | 0.44                   | 7.77                | 0.19                    | 1.59                 | 9.35                    |
| CST3        | gluconate                        | 0.38                   | 5.74                | 0.31                    | 3.60                 | 9.34                    |
| CD14        | three_cystein_S_yl_acetaminophen | 0.35                   | 5.03                | 0.35                    | 4.31                 | 9.34                    |
| AZGP1       | SDMA                             | 0.36                   | 5.13                | 0.34                    | 4.21                 | 9.34                    |
| APOC3       | arabitol                         | 0.35                   | 4.97                | 0.35                    | 4.37                 | 9.34                    |
| C1QA        | X_13553                          | 0.39                   | 6.12                | 0.30                    | 3.22                 | 9.34                    |
| RNASE1      | octanoylcarnitine                | 0.24                   | 2.50                | 0.44                    | 6.84                 | 9.33                    |
| APOC3       | X_10359                          | 0.35                   | 4.90                | 0.35                    | 4.43                 | 9.33                    |
| AZGP1       | X_05426                          | 0.37                   | 5.62                | 0.32                    | 3.71                 | 9.33                    |
| ORM2        | one_five_anhydroglucitol         | -0.26                  | 2.88                | -0.43                   | 6.45                 | 9.33                    |
| ULK4        | pipecolate                       | -0.36                  | 5.23                | -0.34                   | 4.09                 | 9.32                    |
| GPX3        | X_11334                          | -0.36                  | 5.08                | -0.34                   | 4.24                 | 9.32                    |
| SERPIND1    | taurocholate                     | -0.40                  | 6.39                | -0.28                   | 2.93                 | 9.32                    |
| CRP         | one_arachidoyl_GPC               | -0.36                  | 5.30                | -0.33                   | 4.02                 | 9.32                    |
| CFD         | X_04629                          | 0.31                   | 4.00                | 0.39                    | 5.32                 | 9.32                    |
| CST3        | X_02249                          | 0.32                   | 4.17                | 0.38                    | 5.15                 | 9.32                    |
| ORM2        | X_12092                          | 0.38                   | 5.85                | 0.31                    | 3.47                 | 9.32                    |
| PGLYRP2     | X_03056                          | -0.38                  | 5.86                | -0.31                   | 3.46                 | 9.32                    |
| REG1A       | X_05522                          | 0.27                   | 3.13                | 0.42                    | 6.19                 | 9.32                    |

| gene symbol | metabolite               | t0 Pearson Correlation | t0 NegLog10 p-value | t24 Pearson Correlation | t24 NegLog10 p-value | Sum of NegLog10 p-value |
|-------------|--------------------------|------------------------|---------------------|-------------------------|----------------------|-------------------------|
| SAA1        | glycine                  | -0.17                  | 1.42                | -0.47                   | 7.90                 | 9.32                    |
| AHSG        | decanoylcarnitine        | -0.34                  | 4.74                | -0.36                   | 4.57                 | 9.32                    |
| LUM         | citrulline               | 0.37                   | 5.50                | 0.33                    | 3.82                 | 9.32                    |
| CES1        | X_04357                  | 0.36                   | 5.16                | 0.34                    | 4.16                 | 9.31                    |
| LUM         | xylonate                 | 0.32                   | 4.16                | 0.38                    | 5.15                 | 9.31                    |
| AZGP1       | arabinose                | 0.38                   | 5.94                | 0.30                    | 3.37                 | 9.31                    |
| APCS        | caffeine                 | -0.39                  | 6.09                | -0.30                   | 3.22                 | 9.31                    |
| VTN         | X_12117                  | -0.30                  | 3.72                | -0.40                   | 5.58                 | 9.30                    |
| APOC3       | X_12038                  | 0.28                   | 3.23                | 0.41                    | 6.07                 | 9.30                    |
| VWF         | glycochenodeoxycholate   | 0.32                   | 4.30                | 0.38                    | 5.00                 | 9.30                    |
| VASN        | X_12742                  | 0.32                   | 4.10                | 0.38                    | 5.20                 | 9.30                    |
| SAA1        | tryptophan               | -0.32                  | 4.21                | -0.38                   | 5.09                 | 9.30                    |
| CRP         | mannose                  | 0.29                   | 3.53                | 0.40                    | 5.77                 | 9.29                    |
| LCN2        | one_eicosatrienoyl_GPC   | -0.16                  | 1.24                | -0.48                   | 8.05                 | 9.29                    |
| ORM1        | one_palmitoleoyl_GPC     | -0.38                  | 5.85                | -0.31                   | 3.44                 | 9.29                    |
| S100A8      | X_12611                  | 0.40                   | 6.36                | 0.28                    | 2.92                 | 9.28                    |
| SPINK1      | X_10483                  | 0.38                   | 5.86                | 0.31                    | 3.41                 | 9.28                    |
| ADIPOQ      | threitol                 | 0.38                   | 5.92                | 0.30                    | 3.36                 | 9.28                    |
| ORM2        | erythronate              | 0.33                   | 4.45                | 0.37                    | 4.83                 | 9.27                    |
| ORM1        | mannose                  | 0.35                   | 5.01                | 0.34                    | 4.26                 | 9.27                    |
| VTN         | X_03056                  | -0.31                  | 3.98                | -0.39                   | 5.29                 | 9.27                    |
| PON1        | N_acetylthreonine        | -0.28                  | 3.19                | -0.41                   | 6.08                 | 9.27                    |
| HPR         | citrulline               | -0.33                  | 4.31                | -0.37                   | 4.96                 | 9.27                    |
| CFHR2       | N_acetylthreonine        | 0.42                   | 7.02                | 0.24                    | 2.25                 | 9.27                    |
| DEFA1       | HPLA                     | 0.30                   | 3.83                | 0.39                    | 5.43                 | 9.26                    |
| SPINK1      | X_11687                  | 0.38                   | 5.82                | 0.31                    | 3.43                 | 9.25                    |
| LBP         | one_eicosatrienoyl_GPC   | -0.38                  | 5.92                | -0.30                   | 3.32                 | 9.25                    |
| SAA3P       | X_11444                  | 0.35                   | 5.01                | 0.34                    | 4.23                 | 9.24                    |
| S100A9      | isobutyrylcarnitine      | 0.40                   | 6.28                | 0.28                    | 2.97                 | 9.24                    |
| CD14        | two_palmitoyl_GPC        | -0.33                  | 4.55                | -0.36                   | 4.70                 | 9.24                    |
| GPX3        | X_11538                  | 0.38                   | 5.65                | 0.31                    | 3.59                 | 9.24                    |
| IGFBP4      | gulono_1_4_lactone       | 0.39                   | 6.21                | 0.29                    | 3.02                 | 9.24                    |
| REG1A       | X_12206                  | 0.26                   | 2.86                | 0.42                    | 6.37                 | 9.23                    |
| TF          | X_12802                  | -0.35                  | 4.83                | -0.35                   | 4.40                 | 9.23                    |
| SHBG        | X_05522                  | -0.37                  | 5.64                | -0.31                   | 3.58                 | 9.22                    |
| SHBG        | X_12611                  | -0.43                  | 7.23                | -0.22                   | 1.99                 | 9.22                    |
| CST3        | glutamylvaline           | 0.36                   | 5.09                | 0.34                    | 4.13                 | 9.22                    |
| PTGDS       | X_11838                  | 0.24                   | 2.42                | 0.44                    | 6.79                 | 9.22                    |
| CD14        | N2_N2_dimethylguanosine  | 0.29                   | 3.51                | 0.40                    | 5.71                 | 9.21                    |
| TIMP1       | one_arachidoyl_GPE       | -0.26                  | 2.92                | -0.42                   | 6.29                 | 9.21                    |
| LYZ         | myo_inositol             | 0.45                   | 8.06                | 0.16                    | 1.16                 | 9.21                    |
| C4BPA       | taurochenodeoxycholate   | -0.42                  | 6.92                | -0.24                   | 2.29                 | 9.21                    |
| SEPP1       | X_10395                  | 0.46                   | 8.32                | 0.13                    | 0.89                 | 9.21                    |
| CFD         | one_five_anhydroglucitol | -0.25                  | 2.61                | -0.43                   | 6.60                 | 9.20                    |
| ORM2        | X_11826                  | 0.30                   | 3.73                | 0.39                    | 5.47                 | 9.20                    |
| CFHR2       | threonate                | 0.34                   | 4.76                | 0.35                    | 4.44                 | 9.20                    |
| COL3A1      | alpha_hydroxyisovalerate | 0.29                   | 3.54                | 0.40                    | 5.67                 | 9.20                    |
| ORM1        | X_11421                  | 0.29                   | 3.45                | 0.40                    | 5.75                 | 9.20                    |
| SERPINF1    | X_12611                  | 0.26                   | 2.84                | 0.42                    | 6.36                 | 9.20                    |
| VSIG4       | four_acetamidobutanoate  | 0.40                   | 6.34                | 0.28                    | 2.85                 | 9.20                    |
| ECM1        | mannose                  | -0.29                  | 3.44                | -0.40                   | 5.74                 | 9.19                    |
| PLG         | X_10483                  | -0.17                  | 1.42                | -0.47                   | 7.77                 | 9.19                    |
| REG1A       | X_03056                  | 0.23                   | 2.27                | 0.44                    | 6.91                 | 9.18                    |
| ORM1        | X_12092                  | 0.37                   | 5.62                | 0.31                    | 3.56                 | 9.18                    |
| GPX3        | taurocholate             | 0.36                   | 5.32                | 0.33                    | 3.86                 | 9.17                    |
| IGFBP4      | X_12206                  | 0.44                   | 7.67                | 0.19                    | 1.50                 | 9.17                    |

| gene symbol | metabolite                 | t0 Pearson Correlation | t0 NegLog10 p-value | t24 Pearson Correlation | t24 NegLog10 p-value | Sum of NegLog10 p-value |
|-------------|----------------------------|------------------------|---------------------|-------------------------|----------------------|-------------------------|
| S100A9      | butyrylcarnitine           | 0.40                   | 6.41                | 0.27                    | 2.75                 | 9.17                    |
| SAA4        | X_12038                    | 0.29                   | 3.49                | 0.40                    | 5.67                 | 9.16                    |
| FABP1       | alpha_hydroxyisovalerate   | 0.24                   | 2.58                | 0.43                    | 6.58                 | 9.16                    |
| DEFA1       | N_acetylthreonine          | 0.14                   | 1.05                | 0.48                    | 8.10                 | 9.16                    |
| APOA4       | X_02249                    | 0.39                   | 6.19                | 0.28                    | 2.97                 | 9.15                    |
| SPINK1      | carnitine                  | -0.34                  | 4.72                | -0.35                   | 4.44                 | 9.15                    |
| RBMX        | HPLA                       | 0.33                   | 4.54                | 0.36                    | 4.60                 | 9.14                    |
| AMBP        | CMPF                       | 0.34                   | 4.70                | 0.35                    | 4.43                 | 9.14                    |
| RBP4        | X_12844                    | 0.21                   | 2.08                | 0.45                    | 7.06                 | 9.14                    |
| APOH        | methionine                 | -0.42                  | 6.92                | -0.24                   | 2.21                 | 9.13                    |
| SAA1        | one_arachidoyl_GPC         | -0.37                  | 5.40                | -0.32                   | 3.73                 | 9.13                    |
| VASN        | X_12695                    | 0.27                   | 3.14                | 0.41                    | 5.99                 | 9.13                    |
| B2M         | X_11421                    | 0.38                   | 5.67                | 0.31                    | 3.46                 | 9.13                    |
| VTN         | X_11826                    | -0.25                  | 2.73                | -0.43                   | 6.40                 | 9.13                    |
| AZGP1       | X_11850                    | 0.37                   | 5.56                | 0.31                    | 3.57                 | 9.13                    |
| FN1         | X_01327                    | 0.27                   | 3.17                | 0.41                    | 5.96                 | 9.13                    |
| LYZ         | X_04629                    | 0.45                   | 8.21                | 0.14                    | 0.92                 | 9.12                    |
| RBP4        | X_12100                    | 0.26                   | 2.91                | 0.42                    | 6.21                 | 9.12                    |
| SAA4        | X_14658                    | -0.36                  | 5.10                | -0.33                   | 4.02                 | 9.12                    |
| COL11A2     | one_palmitoyl_GPC          | 0.33                   | 4.31                | 0.37                    | 4.80                 | 9.11                    |
| PLEK        | AMP                        | 0.29                   | 3.60                | 0.39                    | 5.51                 | 9.11                    |
| FCGBP       | X_12611                    | 0.20                   | 1.92                | 0.45                    | 7.19                 | 9.11                    |
| DEFA1       | one_methylimidazoleacetate | 0.21                   | 1.97                | 0.45                    | 7.14                 | 9.11                    |
| IGFBP4      | indolelactate              | 0.29                   | 3.59                | 0.39                    | 5.51                 | 9.11                    |
| PGLYRP2     | beta_hydroxyisovalerate    | -0.32                  | 4.16                | -0.37                   | 4.95                 | 9.10                    |
| S100A9      | X_12802                    | 0.37                   | 5.59                | 0.31                    | 3.51                 | 9.10                    |
| CD5L        | taurochenodeoxycholate     | 0.36                   | 5.14                | 0.33                    | 3.96                 | 9.10                    |
| VASN        | X_11334                    | 0.31                   | 4.01                | 0.38                    | 5.09                 | 9.10                    |
| DEFA1       | decanoylcarnitine          | 0.39                   | 5.95                | 0.29                    | 3.14                 | 9.10                    |
| VTN         | one_methylimidazoleacetate | -0.29                  | 3.44                | -0.40                   | 5.66                 | 9.09                    |
| AHSG        | X_12802                    | -0.34                  | 4.60                | -0.35                   | 4.49                 | 9.09                    |
| C1QB        | X_14658                    | 0.41                   | 6.66                | 0.25                    | 2.43                 | 9.09                    |
| FGG         | citrulline                 | -0.39                  | 6.22                | -0.28                   | 2.87                 | 9.09                    |
| ULK4        | seven_HOCA                 | -0.40                  | 6.34                | -0.27                   | 2.75                 | 9.09                    |
| SPINK1      | X_12611                    | 0.34                   | 4.61                | 0.35                    | 4.48                 | 9.09                    |
| CFHR2       | X_06126                    | 0.37                   | 5.50                | 0.31                    | 3.58                 | 9.08                    |
| GPX3        | X_12442                    | 0.40                   | 6.43                | 0.26                    | 2.65                 | 9.08                    |
| FCGBP       | one_linoleoyl_GPC          | -0.19                  | 1.70                | -0.46                   | 7.36                 | 9.07                    |
| ITIH1       | one_palmitoyl_GPC          | 0.31                   | 3.86                | 0.38                    | 5.20                 | 9.06                    |
| PLG         | X_11538                    | -0.26                  | 2.79                | -0.42                   | 6.28                 | 9.06                    |
| ORM1        | erythritol                 | 0.34                   | 4.70                | 0.35                    | 4.36                 | 9.06                    |
| ORM2        | X_12405                    | 0.27                   | 3.01                | 0.41                    | 6.05                 | 9.06                    |
| RNASE1      | X_11450                    | 0.22                   | 2.16                | 0.44                    | 6.89                 | 9.05                    |
| S100A9      | beta_hydroxyisovalerate    | 0.37                   | 5.56                | 0.31                    | 3.48                 | 9.05                    |
| S100A9      | acetylcarnitine            | 0.37                   | 5.38                | 0.32                    | 3.67                 | 9.05                    |
| S100A8      | X_05522                    | 0.39                   | 6.14                | 0.28                    | 2.91                 | 9.05                    |
| B2M         | one_methyladenosine        | 0.45                   | 7.97                | 0.15                    | 1.08                 | 9.05                    |
| APOC3       | X_12117                    | 0.33                   | 4.54                | 0.36                    | 4.51                 | 9.04                    |
| S100A9      | one_arachidoyl_GPC         | -0.22                  | 2.10                | -0.44                   | 6.94                 | 9.04                    |
| SERPINA3    | X_12794                    | 0.35                   | 4.91                | 0.34                    | 4.13                 | 9.04                    |
| APOC1       | X_11317                    | 0.22                   | 2.10                | 0.44                    | 6.93                 | 9.04                    |
| ABCA13      | X_10395                    | 0.07                   | 0.39                | 0.49                    | 8.64                 | 9.04                    |
| ADIPOQ      | xylonate                   | 0.38                   | 5.72                | 0.30                    | 3.32                 | 9.03                    |
| LCN2        | arabitol                   | 0.35                   | 4.91                | 0.34                    | 4.12                 | 9.03                    |
| APOC3       | X_11593                    | 0.33                   | 4.36                | 0.36                    | 4.66                 | 9.02                    |
| ORM2        | X_04507                    | 0.34                   | 4.73                | 0.35                    | 4.29                 | 9.02                    |

| gene symbol | metabolite                       | t0 Pearson Correlation | t0 NegLog10 p-value | t24 Pearson Correlation | t24 NegLog10 p-value | Sum of NegLog10 p-value |
|-------------|----------------------------------|------------------------|---------------------|-------------------------|----------------------|-------------------------|
| S100A9      | X_10483                          | 0.33                   | 4.50                | 0.36                    | 4.52                 | 9.02                    |
| RNASE1      | X_06126                          | 0.35                   | 5.07                | 0.33                    | 3.95                 | 9.02                    |
| RNASE1      | X_07765                          | 0.38                   | 5.73                | 0.30                    | 3.28                 | 9.02                    |
| S100A8      | X_04498                          | 0.40                   | 6.30                | 0.27                    | 2.72                 | 9.02                    |
| SAA1        | X_11302                          | 0.30                   | 3.71                | 0.39                    | 5.31                 | 9.01                    |
| PON1        | X_10483                          | -0.28                  | 3.39                | -0.40                   | 5.63                 | 9.01                    |
| CFD         | sucrose                          | 0.26                   | 2.88                | 0.42                    | 6.13                 | 9.01                    |
| ICAM2       | mannose                          | -0.30                  | 3.77                | -0.38                   | 5.25                 | 9.01                    |
| APOA1       | one_oleoyl_GPC                   | 0.24                   | 2.47                | 0.43                    | 6.54                 | 9.01                    |
| SAA4        | X_10510                          | 0.33                   | 4.39                | 0.36                    | 4.62                 | 9.01                    |
| CST3        | three_cystein_S_yl_acetaminophen | 0.26                   | 2.79                | 0.42                    | 6.22                 | 9.01                    |
| VTN         | hippurate                        | -0.29                  | 3.51                | -0.39                   | 5.50                 | 9.01                    |
| CLU         | one_arachidoyl_GPC               | 0.23                   | 2.37                | 0.43                    | 6.64                 | 9.01                    |
| APCS        | X_14658                          | -0.41                  | 6.61                | -0.25                   | 2.40                 | 9.00                    |
| GPX3        | X_05522                          | -0.36                  | 5.20                | -0.32                   | 3.80                 | 9.00                    |
| CFHR2       | p_cresol_sulfate                 | 0.36                   | 5.33                | 0.32                    | 3.66                 | 9.00                    |
| ORM1        | arabinose                        | 0.33                   | 4.50                | 0.35                    | 4.49                 | 9.00                    |
| CST3        | one_arachidoyl_GPC               | -0.31                  | 3.96                | -0.38                   | 5.03                 | 9.00                    |
| S100A8      | isobutyrylcarnitine              | 0.38                   | 5.82                | 0.29                    | 3.17                 | 8.99                    |
| REG1A       | X_11826                          | 0.29                   | 3.45                | 0.40                    | 5.55                 | 8.99                    |
| LCN2        | X_14658                          | 0.34                   | 4.76                | 0.34                    | 4.23                 | 8.99                    |
| CST3        | X_14658                          | 0.43                   | 7.39                | 0.20                    | 1.59                 | 8.98                    |
| REG1A       | X_12850                          | 0.39                   | 5.97                | 0.28                    | 3.00                 | 8.97                    |
| IGFBP4      | X_12860                          | 0.40                   | 6.51                | 0.25                    | 2.46                 | 8.97                    |
| CST3        | one_stearoyl_GPC                 | -0.28                  | 3.21                | -0.40                   | 5.76                 | 8.97                    |
| CD14        | N_acetylneuraminate              | 0.26                   | 2.90                | 0.41                    | 6.07                 | 8.96                    |
| VSIG4       | X_12099                          | 0.40                   | 6.34                | 0.26                    | 2.61                 | 8.95                    |
| SERPINA6    | one_palmitoyl_GPC                | -0.38                  | 5.72                | -0.30                   | 3.24                 | 8.95                    |
| TF          | one_oleoyl_GPC                   | 0.33                   | 4.46                | 0.35                    | 4.49                 | 8.95                    |
| CLU         | glutamate                        | 0.38                   | 5.67                | 0.30                    | 3.28                 | 8.95                    |
| S100A9      | X_11443                          | 0.36                   | 5.10                | 0.33                    | 3.84                 | 8.94                    |
| DEFA1       | N6_carbamoylthreonyladenine      | 0.18                   | 1.53                | 0.46                    | 7.41                 | 8.94                    |
| GPX3        | sucrose                          | -0.19                  | 1.75                | -0.45                   | 7.19                 | 8.94                    |
| TF          | X_04499                          | -0.34                  | 4.71                | -0.34                   | 4.22                 | 8.93                    |
| REG1A       | creatinine                       | 0.27                   | 3.07                | 0.41                    | 5.86                 | 8.93                    |
| S100A9      | X_10395                          | -0.27                  | 3.09                | -0.41                   | 5.84                 | 8.93                    |
| ORM2        | N_acetylneuraminate              | 0.36                   | 5.29                | 0.32                    | 3.64                 | 8.92                    |
| AFM         | creatine                         | -0.39                  | 6.03                | -0.28                   | 2.89                 | 8.92                    |
| GPX3        | X_11315                          | 0.33                   | 4.46                | 0.35                    | 4.46                 | 8.92                    |
| CLU         | one_palmitoleoyl_GPC             | 0.37                   | 5.39                | 0.31                    | 3.53                 | 8.92                    |
| C1QA        | methionine                       | 0.38                   | 5.79                | 0.29                    | 3.12                 | 8.92                    |
| VWF         | hexanoylcarnitine                | 0.28                   | 3.29                | 0.40                    | 5.62                 | 8.92                    |
| S100A9      | urea                             | 0.39                   | 5.97                | 0.28                    | 2.94                 | 8.91                    |
| APCS        | X_11538                          | -0.41                  | 6.61                | -0.24                   | 2.30                 | 8.91                    |
| SERPINA3    | alpha_ketobutyrate               | 0.24                   | 2.55                | 0.42                    | 6.36                 | 8.91                    |
| IGFBP4      | myo_inositol                     | 0.37                   | 5.56                | 0.30                    | 3.35                 | 8.91                    |
| AMBP        | X_11470                          | 0.30                   | 3.81                | 0.38                    | 5.10                 | 8.91                    |
| CST3        | X_12458                          | 0.44                   | 7.73                | 0.16                    | 1.18                 | 8.91                    |
| CD14        | tryptophan                       | -0.30                  | 3.71                | -0.38                   | 5.20                 | 8.91                    |
| CST3        | taurocholate                     | 0.42                   | 6.91                | 0.22                    | 1.99                 | 8.91                    |
| CFHR2       | X_04504                          | 0.37                   | 5.36                | 0.31                    | 3.54                 | 8.91                    |
| RBP4        | X_04629                          | 0.26                   | 2.79                | 0.42                    | 6.11                 | 8.90                    |
| PLG         | one_arachidoyl_GPC               | 0.15                   | 1.21                | 0.47                    | 7.69                 | 8.90                    |
| MB          | one_arachidoyl_GPC               | -0.23                  | 2.29                | -0.43                   | 6.61                 | 8.89                    |
| APOL1       | HPLA                             | -0.45                  | 8.24                | -0.11                   | 0.65                 | 8.89                    |
| LGALS3BP    | X_04357                          | 0.40                   | 6.33                | 0.26                    | 2.56                 | 8.89                    |

| gene symbol | metabolite                       | t0 Pearson Correlation | t0 NegLog10 p-value | t24 Pearson Correlation | t24 NegLog10 p-value | Sum of NegLog10 p-value |
|-------------|----------------------------------|------------------------|---------------------|-------------------------|----------------------|-------------------------|
| TIMP1       | one_palmitoleoyl_GPC             | -0.27                  | 3.07                | -0.41                   | 5.82                 | 8.89                    |
| APOC3       | X_05522                          | 0.32                   | 4.22                | 0.36                    | 4.67                 | 8.89                    |
| GPX3        | N6_carbamoylthreonyladenosine    | -0.35                  | 5.00                | -0.33                   | 3.88                 | 8.88                    |
| PON1        | SDMA                             | -0.32                  | 4.08                | -0.37                   | 4.80                 | 8.88                    |
| LYZ         | one_methylimidazoleacetate       | 0.46                   | 8.39                | 0.09                    | 0.48                 | 8.88                    |
| APOA4       | X_11334                          | 0.36                   | 5.34                | 0.31                    | 3.53                 | 8.87                    |
| GC          | decanoylcarnitine                | -0.38                  | 5.88                | -0.28                   | 2.99                 | 8.87                    |
| ORM1        | X_12099                          | 0.39                   | 5.97                | 0.28                    | 2.90                 | 8.87                    |
| LCN2        | X_04498                          | 0.35                   | 5.04                | 0.33                    | 3.83                 | 8.87                    |
| FGB         | citrulline                       | -0.40                  | 6.50                | -0.25                   | 2.37                 | 8.87                    |
| VTN         | X_04504                          | -0.24                  | 2.57                | -0.42                   | 6.30                 | 8.87                    |
| FCGBP       | X_11538                          | 0.37                   | 5.55                | 0.30                    | 3.31                 | 8.87                    |
| LUM         | ornithine                        | 0.31                   | 3.93                | 0.37                    | 4.93                 | 8.87                    |
| FCGBP       | two_methylbutyroylcarnitine      | 0.35                   | 4.99                | 0.33                    | 3.88                 | 8.87                    |
| ITIH1       | alpha_hydroxyisovalerate         | -0.36                  | 5.08                | -0.32                   | 3.78                 | 8.86                    |
| ADIPOQ      | citrulline                       | 0.31                   | 3.92                | 0.37                    | 4.95                 | 8.86                    |
| C1QB        | X_11538                          | 0.35                   | 4.98                | 0.33                    | 3.88                 | 8.86                    |
| GPX3        | gluconate                        | -0.44                  | 7.65                | -0.16                   | 1.21                 | 8.86                    |
| ORM1        | one_palmitoyl_GPC                | -0.37                  | 5.61                | -0.30                   | 3.25                 | 8.86                    |
| APOC3       | pyridoxate                       | 0.31                   | 3.86                | 0.38                    | 5.00                 | 8.86                    |
| VASN        | X_12099                          | 0.35                   | 4.88                | 0.33                    | 3.97                 | 8.85                    |
| LBP         | two_methoxyacetaminophen_sulfate | 0.24                   | 2.46                | 0.43                    | 6.39                 | 8.85                    |
| APOE        | X_08402                          | 0.37                   | 5.59                | 0.30                    | 3.26                 | 8.85                    |
| S100A9      | X_12855                          | 0.39                   | 6.10                | 0.27                    | 2.75                 | 8.85                    |
| CD14        | one_arachidoyl_GPE               | -0.29                  | 3.59                | -0.39                   | 5.26                 | 8.85                    |
| APOA4       | allantoin                        | 0.38                   | 5.85                | 0.28                    | 2.99                 | 8.84                    |
| FBLN1       | X_04504                          | 0.29                   | 3.51                | 0.39                    | 5.33                 | 8.84                    |
| CFHR2       | histidine                        | -0.35                  | 4.99                | -0.33                   | 3.85                 | 8.84                    |
| IGFBP4      | X_11261                          | 0.40                   | 6.45                | 0.25                    | 2.39                 | 8.84                    |
| APOD        | X_11317                          | 0.34                   | 4.64                | 0.34                    | 4.19                 | 8.83                    |
| FBLN1       | X_12860                          | 0.29                   | 3.42                | 0.39                    | 5.41                 | 8.82                    |
| SAA1        | seven_HOCA                       | -0.36                  | 5.09                | -0.32                   | 3.73                 | 8.82                    |
| TTR         | X_11538                          | -0.38                  | 5.79                | -0.29                   | 3.03                 | 8.82                    |
| FCGBP       | one_arachidoyl_GPC               | -0.25                  | 2.61                | -0.42                   | 6.21                 | 8.82                    |
| SERPINA3    | hexanoylcarnitine                | 0.35                   | 4.90                | 0.33                    | 3.92                 | 8.81                    |
| CD14        | X_12794                          | 0.29                   | 3.58                | 0.38                    | 5.23                 | 8.81                    |
| APOA2       | hexanoylcarnitine                | -0.39                  | 6.03                | -0.27                   | 2.78                 | 8.81                    |
| VTN         | prolylhydroxyproline             | -0.27                  | 3.03                | -0.40                   | 5.78                 | 8.81                    |
| CST3        | X_11787                          | -0.38                  | 5.67                | -0.29                   | 3.14                 | 8.81                    |
| VTN         | N2_N2_dimethylguanosine          | -0.28                  | 3.35                | -0.39                   | 5.46                 | 8.81                    |
| S100A8      | one_palmitoyl_GPC                | -0.26                  | 2.93                | -0.41                   | 5.88                 | 8.81                    |
| ORM1        | X_12100                          | 0.34                   | 4.75                | 0.34                    | 4.06                 | 8.80                    |
| GC          | octanoylcarnitine                | -0.34                  | 4.61                | -0.34                   | 4.19                 | 8.80                    |
| LCN2        | X_12749                          | 0.31                   | 4.03                | 0.37                    | 4.77                 | 8.80                    |
| ORM1        | X_11880                          | -0.37                  | 5.53                | -0.30                   | 3.27                 | 8.80                    |
| VASN        | X_10359                          | 0.30                   | 3.79                | 0.38                    | 5.01                 | 8.80                    |
| C1QA        | one_arachidoyl_GPE               | -0.31                  | 4.03                | -0.37                   | 4.77                 | 8.80                    |
| LUM         | X_11687                          | 0.32                   | 4.14                | 0.36                    | 4.66                 | 8.80                    |
| GPX3        | X_14658                          | 0.34                   | 4.66                | 0.34                    | 4.12                 | 8.79                    |
| B2M         | two_hydroxyacetaminophen_sulfate | 0.24                   | 2.49                | 0.42                    | 6.29                 | 8.78                    |
| PON1        | one_eicosatrienoyl_GPC           | 0.31                   | 4.02                | 0.37                    | 4.77                 | 8.78                    |
| LBP         | glycine                          | -0.15                  | 1.16                | -0.46                   | 7.62                 | 8.78                    |
| RNASE1      | X_11175                          | 0.29                   | 3.58                | 0.38                    | 5.20                 | 8.78                    |
| AHSG        | one_five_anhydroglucitol         | 0.27                   | 3.08                | 0.40                    | 5.70                 | 8.78                    |
| VSIG4       | pseudouridine                    | 0.38                   | 5.86                | 0.28                    | 2.92                 | 8.78                    |

| gene symbol | metabolite                      | t0 Pearson Correlation | t0 NegLog10 p-value | t24 Pearson Correlation | t24 NegLog10 p-value | Sum of NegLog10 p-value |
|-------------|---------------------------------|------------------------|---------------------|-------------------------|----------------------|-------------------------|
| REG1A       | X_10359                         | 0.30                   | 3.73                | 0.38                    | 5.04                 | 8.77                    |
| RNASE1      | X_11787                         | -0.32                  | 4.15                | -0.36                   | 4.62                 | 8.77                    |
| B2M         | X_11450                         | 0.25                   | 2.63                | 0.42                    | 6.15                 | 8.77                    |
| AFM         | X_11880                         | 0.31                   | 3.99                | 0.37                    | 4.77                 | 8.77                    |
| RBP4        | X_12742                         | 0.25                   | 2.66                | 0.42                    | 6.11                 | 8.77                    |
| GPX3        | gamma_glutamyltyrosine          | 0.42                   | 6.98                | 0.21                    | 1.79                 | 8.77                    |
| CST3        | acetylcarnitine                 | 0.36                   | 5.25                | 0.31                    | 3.52                 | 8.77                    |
| ITIH3       | citrate                         | -0.39                  | 5.96                | -0.27                   | 2.80                 | 8.76                    |
| REG1A       | four_vinylphenol_sulfate        | 0.27                   | 3.11                | 0.40                    | 5.65                 | 8.76                    |
| PTGDS       | X_06126                         | 0.29                   | 3.53                | 0.38                    | 5.23                 | 8.76                    |
| CFD         | X_11593                         | 0.26                   | 2.90                | 0.41                    | 5.86                 | 8.76                    |
| REG1A       | gulono_1_4_lactone              | 0.27                   | 3.05                | 0.40                    | 5.71                 | 8.76                    |
| TTR         | one_stearoyl_GPC                | 0.31                   | 3.98                | 0.37                    | 4.77                 | 8.75                    |
| VTN         | X_04499                         | -0.33                  | 4.41                | -0.35                   | 4.34                 | 8.75                    |
| LYZ         | X_11429                         | 0.44                   | 7.80                | 0.14                    | 0.95                 | 8.75                    |
| SERPINA3    | one_arachidoyl_GPC              | -0.33                  | 4.40                | -0.35                   | 4.35                 | 8.75                    |
| DEFA1       | X_11421                         | 0.32                   | 4.17                | 0.36                    | 4.58                 | 8.75                    |
| ITIH2       | X_12458                         | -0.38                  | 5.70                | -0.29                   | 3.04                 | 8.74                    |
| RBP4        | X_12092                         | 0.25                   | 2.69                | 0.41                    | 6.05                 | 8.74                    |
| S100A8      | three_hydroxy_2_ethylpropionate | 0.37                   | 5.40                | 0.30                    | 3.34                 | 8.74                    |
| VSIG4       | X_12695                         | 0.35                   | 4.92                | 0.33                    | 3.82                 | 8.74                    |
| CD14        | gamma_glutamylphenylalanine     | 0.36                   | 5.31                | 0.31                    | 3.42                 | 8.73                    |
| C1QA        | X_12095                         | 0.32                   | 4.12                | 0.36                    | 4.61                 | 8.72                    |
| APOC3       | X_11261                         | 0.36                   | 5.16                | 0.31                    | 3.56                 | 8.72                    |
| PLG         | decanoylcarnitine               | -0.27                  | 3.12                | -0.40                   | 5.60                 | 8.72                    |
| DEFA1       | one_eicosatrienoyl_GPC          | -0.16                  | 1.32                | -0.46                   | 7.41                 | 8.72                    |
| SERPINA3    | X_11786                         | -0.33                  | 4.52                | -0.34                   | 4.20                 | 8.72                    |
| S100A8      | X_12100                         | 0.38                   | 5.72                | 0.28                    | 3.00                 | 8.72                    |
| CLU         | one_stearoyl_GPC                | 0.29                   | 3.51                | 0.38                    | 5.21                 | 8.72                    |
| CST3        | X_11510                         | 0.34                   | 4.57                | 0.34                    | 4.14                 | 8.71                    |
| CD14        | X_11687                         | 0.24                   | 2.47                | 0.42                    | 6.24                 | 8.71                    |
| S100A8      | X_12860                         | 0.41                   | 6.86                | 0.21                    | 1.85                 | 8.71                    |
| DEFA1       | one_palmitoleoyl_GPC            | -0.10                  | 0.68                | -0.48                   | 8.03                 | 8.71                    |
| RNASE1      | catechol_sulfate                | 0.37                   | 5.55                | 0.29                    | 3.15                 | 8.71                    |
| HRG         | X_04499                         | -0.39                  | 5.96                | -0.27                   | 2.74                 | 8.70                    |
| CST3        | three_hydroxy_2_ethylpropionate | 0.39                   | 6.00                | 0.27                    | 2.70                 | 8.70                    |
| GC          | X_13553                         | -0.34                  | 4.77                | -0.33                   | 3.93                 | 8.70                    |
| S100A8      | X_12099                         | 0.43                   | 7.34                | 0.18                    | 1.36                 | 8.70                    |
| FBLN1       | erythritol                      | 0.29                   | 3.43                | 0.39                    | 5.27                 | 8.70                    |
| SERPINF1    | X_12117                         | 0.29                   | 3.55                | 0.38                    | 5.14                 | 8.69                    |
| APOA2       | one_palmitoyl_GPC               | 0.31                   | 3.91                | 0.37                    | 4.77                 | 8.69                    |
| APOC2       | one_palmitoylglycerol           | 0.41                   | 6.57                | 0.23                    | 2.11                 | 8.68                    |
| C1QB        | X_13553                         | 0.42                   | 7.19                | 0.19                    | 1.48                 | 8.68                    |
| C7          | octadecanedioate                | 0.39                   | 5.98                | 0.27                    | 2.69                 | 8.67                    |
| ADIPOQ      | threonate                       | 0.37                   | 5.45                | 0.30                    | 3.22                 | 8.67                    |
| ADIPOQ      | X_10359                         | 0.37                   | 5.47                | 0.29                    | 3.20                 | 8.67                    |
| ITIH2       | X_10483                         | -0.36                  | 5.14                | -0.31                   | 3.52                 | 8.66                    |
| C1QA        | X_12100                         | 0.31                   | 3.88                | 0.37                    | 4.78                 | 8.66                    |
| CLU         | one_eicosatrienoyl_GPC          | 0.26                   | 2.93                | 0.40                    | 5.73                 | 8.66                    |
| LCN2        | gulono_1_4_lactone              | 0.34                   | 4.68                | 0.33                    | 3.97                 | 8.66                    |
| S100A9      | N_acetylaniline                 | 0.29                   | 3.55                | 0.38                    | 5.11                 | 8.66                    |
| REG1A       | pyridoxate                      | 0.24                   | 2.58                | 0.41                    | 6.07                 | 8.65                    |
| TTR         | one_arachidoyl_GPE              | 0.36                   | 5.22                | 0.31                    | 3.44                 | 8.65                    |
| APOC3       | X_12095                         | 0.27                   | 2.99                | 0.40                    | 5.67                 | 8.65                    |
| LUM         | glycochenodeoxycholate          | 0.33                   | 4.37                | 0.35                    | 4.28                 | 8.65                    |
| S100A8      | four_acetamidobutanoate         | 0.36                   | 5.21                | 0.31                    | 3.43                 | 8.65                    |



| gene symbol | metabolite                       | t0 Pearson Correlation | t0 NegLog10 p-value | t24 Pearson Correlation | t24 NegLog10 p-value | Sum of NegLog10 p-value |
|-------------|----------------------------------|------------------------|---------------------|-------------------------|----------------------|-------------------------|
| ORM2        | X_12100                          | 0.32                   | 4.30                | 0.35                    | 4.35                 | 8.65                    |
| LRG1        | one_arachidoyl_GPC               | -0.38                  | 5.82                | -0.27                   | 2.83                 | 8.65                    |
| DEFA1       | one_arachidoyl_GPC               | -0.15                  | 1.20                | -0.46                   | 7.44                 | 8.64                    |
| LCP1        | hexanoylcarnitine                | 0.33                   | 4.50                | 0.34                    | 4.15                 | 8.64                    |
| GPX3        | pyridoxate                       | -0.36                  | 5.09                | -0.31                   | 3.55                 | 8.64                    |
| RBP4        | X_05907                          | 0.28                   | 3.37                | 0.39                    | 5.27                 | 8.64                    |
| FCGBP       | one_palmitoleoyl_GPC             | -0.16                  | 1.36                | -0.45                   | 7.28                 | 8.64                    |
| REG1A       | X_11490                          | 0.32                   | 4.06                | 0.36                    | 4.57                 | 8.63                    |
| HRG         | three_hydroxy_2_ethylpropionate  | -0.36                  | 5.19                | -0.31                   | 3.44                 | 8.63                    |
| IGFBP4      | X_12611                          | 0.42                   | 6.92                | 0.20                    | 1.71                 | 8.63                    |
| HPR         | X_01327                          | -0.32                  | 4.22                | -0.35                   | 4.41                 | 8.63                    |
| S100A8      | N2_N2_dimethylguanosine          | 0.36                   | 5.26                | 0.30                    | 3.37                 | 8.62                    |
| B2M         | X_13619                          | -0.30                  | 3.70                | -0.37                   | 4.92                 | 8.62                    |
| PLG         | one_palmitoleoyl_GPC             | 0.33                   | 4.43                | 0.34                    | 4.19                 | 8.62                    |
| CST3        | four_vinylphenol_sulfate         | 0.27                   | 3.17                | 0.39                    | 5.45                 | 8.62                    |
| AHSG        | N_acetylneuraminate              | -0.35                  | 4.85                | -0.32                   | 3.77                 | 8.62                    |
| GPX3        | p_cresol_sulfate                 | -0.39                  | 5.97                | -0.26                   | 2.64                 | 8.62                    |
| GPX3        | X_12786                          | 0.39                   | 6.24                | 0.25                    | 2.37                 | 8.61                    |
| LYZ         | gluconate                        | 0.45                   | 8.08                | 0.09                    | 0.53                 | 8.61                    |
| SAA3P       | two_hydroxyacetaminophen_sulfate | 0.23                   | 2.31                | 0.42                    | 6.30                 | 8.61                    |
| VSIG4       | X_04504                          | 0.37                   | 5.64                | 0.28                    | 2.97                 | 8.61                    |
| S100A8      | X_03056                          | 0.39                   | 6.15                | 0.25                    | 2.46                 | 8.60                    |
| ORM1        | SDMA                             | 0.33                   | 4.38                | 0.34                    | 4.22                 | 8.60                    |
| SAA3P       | X_12611                          | 0.34                   | 4.59                | 0.33                    | 4.01                 | 8.59                    |
| AFM         | glutamine                        | 0.29                   | 3.48                | 0.38                    | 5.12                 | 8.59                    |
| KNG1        | citrulline                       | 0.30                   | 3.74                | 0.37                    | 4.85                 | 8.59                    |
| VTN         | glycerate                        | -0.32                  | 4.27                | -0.35                   | 4.32                 | 8.59                    |
| LYZ         | X_12688                          | 0.45                   | 7.95                | 0.11                    | 0.64                 | 8.59                    |
| ADIPOQ      | citrate                          | 0.35                   | 4.97                | 0.32                    | 3.61                 | 8.59                    |
| DEFA1       | phenylacetylglutamine            | 0.22                   | 2.12                | 0.43                    | 6.47                 | 8.58                    |
| PTGDS       | citrulline                       | 0.21                   | 2.04                | 0.43                    | 6.54                 | 8.58                    |
| GPX3        | X_12217                          | -0.33                  | 4.43                | -0.34                   | 4.15                 | 8.58                    |
| ORM1        | X_04629                          | 0.34                   | 4.80                | 0.32                    | 3.79                 | 8.58                    |
| VASN        | X_04498                          | 0.33                   | 4.39                | 0.34                    | 4.19                 | 8.58                    |
| LCN2        | X_10359                          | 0.33                   | 4.49                | 0.34                    | 4.09                 | 8.58                    |
| LBP         | citrate                          | -0.36                  | 5.29                | -0.30                   | 3.28                 | 8.58                    |
| APOE        | X_10744                          | 0.40                   | 6.41                | 0.24                    | 2.16                 | 8.57                    |
| PON1        | X_12802                          | -0.30                  | 3.63                | -0.37                   | 4.95                 | 8.57                    |
| SERPINF1    | pseudouridine                    | 0.33                   | 4.51                | 0.34                    | 4.05                 | 8.57                    |
| LCN2        | three_indoxyl_sulfate            | 0.26                   | 2.81                | 0.40                    | 5.75                 | 8.56                    |
| SERPINC1    | X_11538                          | -0.31                  | 3.97                | -0.36                   | 4.58                 | 8.56                    |
| APOA2       | one_stearoyl_GPC                 | 0.26                   | 2.97                | 0.40                    | 5.59                 | 8.56                    |
| SHBG        | X_11443                          | -0.28                  | 3.30                | -0.39                   | 5.26                 | 8.56                    |
| LCN2        | hexanoylcarnitine                | 0.32                   | 4.23                | 0.35                    | 4.33                 | 8.56                    |
| DEFA1       | X_12855                          | 0.32                   | 4.30                | 0.34                    | 4.26                 | 8.55                    |
| HRG         | N_acetylalanine                  | -0.31                  | 4.06                | -0.35                   | 4.50                 | 8.55                    |
| ORM1        | glutamine                        | -0.33                  | 4.46                | -0.34                   | 4.10                 | 8.55                    |
| APOA1       | two_methylbutyroylcarnitine      | -0.34                  | 4.74                | -0.32                   | 3.82                 | 8.55                    |
| ORM2        | creatine                         | 0.31                   | 3.92                | 0.36                    | 4.63                 | 8.55                    |
| GPX3        | X_01327                          | 0.40                   | 6.27                | 0.24                    | 2.27                 | 8.54                    |
| SAA1        | X_11593                          | 0.37                   | 5.57                | 0.28                    | 2.97                 | 8.54                    |
| COL11A2     | mannose                          | -0.25                  | 2.76                | -0.40                   | 5.78                 | 8.54                    |
| ICAM2       | proline                          | 0.33                   | 4.53                | 0.33                    | 4.01                 | 8.54                    |
| CES1        | N_acetylneuraminate              | 0.07                   | 0.44                | 0.48                    | 8.10                 | 8.54                    |
| TTR         | three_methylhistidine            | 0.27                   | 3.10                | 0.39                    | 5.44                 | 8.54                    |
| C1QB        | pipecolate                       | 0.34                   | 4.60                | 0.33                    | 3.93                 | 8.54                    |

| gene symbol | metabolite                      | t0 Pearson Correlation | t0 NegLog10 p-value | t24 Pearson Correlation | t24 NegLog10 p-value | Sum of NegLog10 p-value |
|-------------|---------------------------------|------------------------|---------------------|-------------------------|----------------------|-------------------------|
| ADIPOQ      | allantoin                       | 0.36                   | 5.12                | 0.31                    | 3.41                 | 8.54                    |
| AHSG        | X_12510                         | 0.37                   | 5.49                | 0.29                    | 3.04                 | 8.53                    |
| TTR         | octadecanedioate                | -0.38                  | 5.91                | -0.26                   | 2.62                 | 8.53                    |
| S100A8      | phenylacetylglutamine           | 0.30                   | 3.78                | 0.37                    | 4.75                 | 8.53                    |
| APOH        | X_11315                         | -0.37                  | 5.55                | -0.28                   | 2.97                 | 8.52                    |
| FBLN1       | X_11687                         | 0.29                   | 3.46                | 0.38                    | 5.06                 | 8.52                    |
| ORM2        | prolylhydroxyproline            | 0.32                   | 4.25                | 0.35                    | 4.27                 | 8.52                    |
| VASN        | one_methylimidazoleacetate      | 0.33                   | 4.39                | 0.34                    | 4.14                 | 8.52                    |
| LUM         | X_11334                         | 0.33                   | 4.35                | 0.34                    | 4.17                 | 8.52                    |
| AFM         | N_acetylthreonine               | -0.39                  | 6.00                | -0.26                   | 2.52                 | 8.52                    |
| ORM2        | X_12099                         | 0.38                   | 5.86                | 0.27                    | 2.66                 | 8.52                    |
| RANBP2      | mannose                         | -0.14                  | 1.10                | -0.46                   | 7.42                 | 8.52                    |
| LYZ         | arabinose                       | 0.44                   | 7.77                | 0.12                    | 0.74                 | 8.51                    |
| PLG         | X_11687                         | -0.08                  | 0.51                | -0.47                   | 8.00                 | 8.51                    |
| CST3        | X_11175                         | 0.35                   | 5.03                | 0.31                    | 3.48                 | 8.50                    |
| S100A8      | SDMA                            | 0.38                   | 5.68                | 0.27                    | 2.82                 | 8.50                    |
| B2M         | citrulline                      | 0.20                   | 1.91                | 0.43                    | 6.59                 | 8.50                    |
| LCP1        | butyrylcarnitine                | 0.35                   | 5.07                | 0.31                    | 3.43                 | 8.50                    |
| PON1        | one_palmitoyl_GPC               | 0.34                   | 4.56                | 0.33                    | 3.94                 | 8.50                    |
| LBP         | X_12802                         | 0.36                   | 5.12                | 0.30                    | 3.38                 | 8.50                    |
| SPINK1      | erythronate                     | 0.35                   | 4.94                | 0.31                    | 3.56                 | 8.49                    |
| APOC3       | erythronate                     | 0.34                   | 4.73                | 0.32                    | 3.77                 | 8.49                    |
| MB          | acetylcarnitine                 | 0.25                   | 2.61                | 0.41                    | 5.88                 | 8.49                    |
| AZGP1       | quininate                       | 0.36                   | 5.32                | 0.29                    | 3.17                 | 8.49                    |
| B2M         | scyllo_inositol                 | 0.36                   | 5.28                | 0.30                    | 3.21                 | 8.49                    |
| LGALS3BP    | lactate                         | 0.40                   | 6.46                | 0.23                    | 2.03                 | 8.49                    |
| APOB        | X_12038                         | 0.27                   | 3.03                | 0.39                    | 5.46                 | 8.49                    |
| VTN         | X_12749                         | -0.33                  | 4.45                | -0.33                   | 4.04                 | 8.48                    |
| PTGDS       | tryptophan                      | -0.43                  | 7.45                | -0.15                   | 1.03                 | 8.48                    |
| GPX3        | X_12844                         | -0.39                  | 5.96                | -0.26                   | 2.52                 | 8.48                    |
| ORM1        | X_11826                         | 0.30                   | 3.81                | 0.36                    | 4.67                 | 8.48                    |
| ORM2        | erythritol                      | 0.32                   | 4.11                | 0.35                    | 4.37                 | 8.48                    |
| AZGP1       | X_04595                         | 0.34                   | 4.79                | 0.32                    | 3.69                 | 8.47                    |
| GC          | acetylcarnitine                 | -0.31                  | 3.97                | -0.36                   | 4.50                 | 8.47                    |
| SAA3P       | citrate                         | -0.36                  | 5.29                | -0.29                   | 3.18                 | 8.47                    |
| AMBP        | X_08889                         | 0.21                   | 1.99                | 0.43                    | 6.48                 | 8.47                    |
| AFM         | isobutyrylcarnitine             | -0.39                  | 6.00                | -0.25                   | 2.47                 | 8.47                    |
| FCGBP       | X_05522                         | 0.25                   | 2.60                | 0.41                    | 5.86                 | 8.46                    |
| APOA1       | one_linoleoyl_GPC               | 0.27                   | 3.12                | 0.39                    | 5.33                 | 8.45                    |
| LCN2        | X_04629                         | 0.31                   | 3.93                | 0.36                    | 4.52                 | 8.45                    |
| REG1A       | deoxycarnitine                  | 0.31                   | 3.91                | 0.36                    | 4.54                 | 8.45                    |
| APOC1       | alpha_tocopherol                | 0.32                   | 4.16                | 0.35                    | 4.29                 | 8.45                    |
| CD14        | erythronate                     | 0.28                   | 3.24                | 0.38                    | 5.20                 | 8.45                    |
| AFM         | one_eicosatrienoyl_GPC          | 0.34                   | 4.78                | 0.32                    | 3.66                 | 8.44                    |
| IGFBP4      | mannitol                        | 0.41                   | 6.63                | 0.21                    | 1.81                 | 8.44                    |
| APOE        | X_12850                         | 0.34                   | 4.69                | 0.32                    | 3.74                 | 8.44                    |
| B2M         | X_09789                         | 0.34                   | 4.73                | 0.32                    | 3.71                 | 8.44                    |
| VASN        | arabinose                       | 0.32                   | 4.28                | 0.34                    | 4.16                 | 8.44                    |
| AHSG        | three_hydroxy_2_ethylpropionate | -0.39                  | 6.19                | -0.24                   | 2.24                 | 8.43                    |
| FN1         | tyrosine                        | 0.29                   | 3.59                | 0.37                    | 4.84                 | 8.43                    |
| ITIH1       | beta_hydroxyisovalerate         | -0.31                  | 4.05                | -0.35                   | 4.38                 | 8.43                    |
| ABCA13      | mannose                         | -0.31                  | 4.04                | -0.35                   | 4.39                 | 8.43                    |
| LUM         | X_12695                         | 0.32                   | 4.22                | 0.34                    | 4.21                 | 8.43                    |
| PGLYRP2     | X_10395                         | 0.33                   | 4.51                | 0.33                    | 3.92                 | 8.43                    |
| DEFA1       | urea                            | 0.31                   | 3.94                | 0.35                    | 4.48                 | 8.42                    |
| RBMX        | X_11538                         | 0.27                   | 3.15                | 0.39                    | 5.27                 | 8.42                    |

| gene symbol | metabolite                       | t0 Pearson Correlation | t0 NegLog10 p-value | t24 Pearson Correlation | t24 NegLog10 p-value | Sum of NegLog10 p-value |
|-------------|----------------------------------|------------------------|---------------------|-------------------------|----------------------|-------------------------|
| KNG1        | hexanoylcarnitine                | -0.33                  | 4.50                | -0.33                   | 3.92                 | 8.42                    |
| DEFA1       | X_04499                          | 0.30                   | 3.63                | 0.37                    | 4.78                 | 8.41                    |
| REG1A       | phenol_sulfate                   | 0.27                   | 3.18                | 0.38                    | 5.24                 | 8.41                    |
| GPX3        | X_11444                          | -0.41                  | 6.57                | -0.21                   | 1.85                 | 8.41                    |
| CFHR2       | X_12695                          | 0.33                   | 4.42                | 0.33                    | 3.99                 | 8.41                    |
| SERPINA6    | X_12794                          | 0.33                   | 4.37                | 0.34                    | 4.04                 | 8.41                    |
| FCGBP       | N_acetylthreonine                | 0.33                   | 4.37                | 0.34                    | 4.04                 | 8.41                    |
| SPINK1      | N_acetylthreonine                | 0.39                   | 6.13                | 0.24                    | 2.28                 | 8.41                    |
| CFD         | X_12092                          | 0.28                   | 3.23                | 0.38                    | 5.18                 | 8.41                    |
| CFD         | X_11315                          | -0.28                  | 3.34                | -0.38                   | 5.07                 | 8.41                    |
| ACTBL2      | AMP                              | 0.38                   | 5.87                | 0.26                    | 2.53                 | 8.41                    |
| FCGBP       | octadecanedioate                 | 0.38                   | 5.71                | 0.27                    | 2.69                 | 8.41                    |
| HPX         | pipecolate                       | -0.36                  | 5.24                | -0.29                   | 3.16                 | 8.41                    |
| RBP4        | cysteine                         | 0.21                   | 2.06                | 0.42                    | 6.34                 | 8.41                    |
| CFD         | quininate                        | 0.32                   | 4.26                | 0.34                    | 4.14                 | 8.40                    |
| SAA3P       | X_11302                          | 0.28                   | 3.37                | 0.38                    | 5.03                 | 8.40                    |
| KLKB1       | X_13553                          | -0.32                  | 4.12                | -0.35                   | 4.29                 | 8.40                    |
| LYZ         | quininate                        | 0.41                   | 6.64                | 0.21                    | 1.76                 | 8.40                    |
| C1QA        | deoxycarnitine                   | 0.33                   | 4.51                | 0.33                    | 3.89                 | 8.40                    |
| S100A8      | one_stearoyl_GPC                 | -0.23                  | 2.41                | -0.41                   | 5.99                 | 8.40                    |
| SAA1        | two_hydroxyacetaminophen_sulfate | 0.22                   | 2.15                | 0.42                    | 6.25                 | 8.40                    |
| LYZ         | glutaroylcarnitine               | 0.41                   | 6.83                | 0.19                    | 1.56                 | 8.39                    |
| CD14        | X_12802                          | 0.27                   | 3.16                | 0.38                    | 5.23                 | 8.39                    |
| SAA3P       | one_arachidoyl_GPC               | -0.38                  | 5.66                | -0.27                   | 2.73                 | 8.39                    |
| AHSG        | one_eicosatrienoyl_GPC           | 0.29                   | 3.55                | 0.37                    | 4.84                 | 8.39                    |
| VSIG4       | tiglyl_carnitine                 | 0.36                   | 5.22                | 0.29                    | 3.17                 | 8.39                    |
| ICAM2       | HPLA                             | 0.34                   | 4.81                | 0.31                    | 3.57                 | 8.39                    |
| CES1        | pipecolate                       | 0.20                   | 1.84                | 0.43                    | 6.54                 | 8.38                    |
| FCGBP       | tryptophan                       | -0.30                  | 3.75                | -0.36                   | 4.64                 | 8.38                    |
| SPINK1      | X_11826                          | 0.30                   | 3.69                | 0.36                    | 4.69                 | 8.38                    |
| CD14        | N6_carbamoylthreonyladenosine    | 0.25                   | 2.72                | 0.40                    | 5.66                 | 8.38                    |
| VASN        | X_12092                          | 0.36                   | 5.20                | 0.29                    | 3.17                 | 8.37                    |
| CFHR2       | X_04498                          | 0.36                   | 5.30                | 0.29                    | 3.07                 | 8.37                    |
| C1QB        | X_12850                          | 0.41                   | 6.81                | 0.19                    | 1.57                 | 8.37                    |
| APOC3       | pantothenate                     | 0.34                   | 4.71                | 0.32                    | 3.66                 | 8.37                    |
| SAA3P       | tryptophan                       | -0.31                  | 3.90                | -0.35                   | 4.47                 | 8.37                    |
| S100A8      | X_12855                          | 0.41                   | 6.82                | 0.19                    | 1.55                 | 8.37                    |
| APOD        | alpha_tocopherol                 | 0.32                   | 4.24                | 0.34                    | 4.13                 | 8.37                    |
| APOC3       | X_11423                          | 0.31                   | 3.98                | 0.35                    | 4.39                 | 8.37                    |
| C7          | X_11491                          | 0.29                   | 3.44                | 0.37                    | 4.93                 | 8.37                    |
| APOL1       | X_05907                          | 0.43                   | 7.30                | 0.15                    | 1.07                 | 8.37                    |
| GPX3        | caffeine                         | 0.36                   | 5.10                | 0.30                    | 3.27                 | 8.37                    |
| REG1A       | X_12611                          | 0.32                   | 4.10                | 0.34                    | 4.26                 | 8.37                    |
| MB          | X_11538                          | 0.10                   | 0.67                | 0.47                    | 7.69                 | 8.36                    |
| FCGBP       | X_04495                          | 0.31                   | 3.95                | 0.35                    | 4.41                 | 8.36                    |
| PTGDS       | X_04595                          | 0.30                   | 3.78                | 0.36                    | 4.58                 | 8.36                    |
| APOA4       | xylonate                         | 0.34                   | 4.60                | 0.32                    | 3.76                 | 8.36                    |
| SERPINF1    | three_cystein_S_yl_acetaminophen | 0.24                   | 2.55                | 0.41                    | 5.80                 | 8.36                    |
| FBLN1       | X_11593                          | 0.28                   | 3.34                | 0.38                    | 5.02                 | 8.36                    |
| AZGP1       | indolelactate                    | 0.43                   | 7.39                | 0.14                    | 0.96                 | 8.35                    |
| S100A8      | X_12695                          | 0.35                   | 4.91                | 0.31                    | 3.44                 | 8.35                    |
| APOA4       | carnitine                        | -0.36                  | 5.11                | -0.30                   | 3.24                 | 8.35                    |
| LBP         | X_12611                          | 0.30                   | 3.74                | 0.36                    | 4.61                 | 8.35                    |
| LUM         | X_12860                          | 0.30                   | 3.68                | 0.36                    | 4.67                 | 8.35                    |
| APOH        | three_indoxyl_sulfate            | 0.39                   | 5.96                | 0.25                    | 2.38                 | 8.35                    |
| C8A         | mannose                          | 0.03                   | 0.17                | 0.48                    | 8.18                 | 8.34                    |

| gene symbol | metabolite                  | t0 Pearson Correlation | t0 NegLog10 p-value | t24 Pearson Correlation | t24 NegLog10 p-value | Sum of NegLog10 p-value |
|-------------|-----------------------------|------------------------|---------------------|-------------------------|----------------------|-------------------------|
| PLG         | four_acetamidobutanoate     | -0.10                  | 0.64                | -0.47                   | 7.69                 | 8.34                    |
| LCN2        | tryptophan                  | -0.36                  | 5.27                | -0.29                   | 3.06                 | 8.33                    |
| SERPINA3    | one_eicosatrienoyl_GPC      | -0.35                  | 5.02                | -0.30                   | 3.32                 | 8.33                    |
| PLG         | creatine                    | -0.31                  | 4.05                | -0.35                   | 4.28                 | 8.33                    |
| RNASE1      | kynurenine                  | 0.32                   | 4.10                | 0.34                    | 4.23                 | 8.33                    |
| TF          | X_12611                     | -0.30                  | 3.77                | -0.36                   | 4.56                 | 8.33                    |
| APCS        | glycocholate                | -0.37                  | 5.60                | -0.27                   | 2.73                 | 8.33                    |
| C1QB        | alpha_hydroxyisovalerate    | 0.35                   | 5.02                | 0.30                    | 3.30                 | 8.32                    |
| SERPINF1    | X_12794                     | 0.19                   | 1.65                | 0.43                    | 6.67                 | 8.32                    |
| REG1A       | sucrose                     | 0.25                   | 2.64                | 0.40                    | 5.68                 | 8.32                    |
| RBMX        | seven_HOCA                  | 0.34                   | 4.57                | 0.32                    | 3.75                 | 8.32                    |
| S100A9      | creatine                    | 0.34                   | 4.72                | 0.31                    | 3.61                 | 8.32                    |
| ORM2        | X_01327                     | -0.37                  | 5.47                | -0.28                   | 2.85                 | 8.32                    |
| LRG1        | tryptophan                  | -0.26                  | 2.93                | -0.39                   | 5.39                 | 8.32                    |
| A1BG        | X_12794                     | -0.36                  | 5.36                | -0.28                   | 2.96                 | 8.32                    |
| RNASE1      | X_13619                     | -0.25                  | 2.63                | -0.40                   | 5.68                 | 8.32                    |
| GPX3        | X_11593                     | -0.40                  | 6.27                | -0.23                   | 2.05                 | 8.31                    |
| ORM2        | X_11593                     | 0.32                   | 4.20                | 0.34                    | 4.11                 | 8.31                    |
| C1QA        | X_12860                     | 0.31                   | 4.02                | 0.35                    | 4.29                 | 8.31                    |
| ORM1        | one_linoleoyl_GPC           | -0.35                  | 4.86                | -0.31                   | 3.45                 | 8.31                    |
| LCN2        | X_12855                     | 0.31                   | 4.03                | 0.35                    | 4.28                 | 8.31                    |
| IGFBP4      | SDMA                        | 0.40                   | 6.45                | 0.21                    | 1.85                 | 8.30                    |
| AFM         | X_11421                     | -0.36                  | 5.24                | -0.29                   | 3.06                 | 8.30                    |
| GPX3        | hippurate                   | -0.29                  | 3.58                | -0.36                   | 4.72                 | 8.30                    |
| CD5L        | methionine                  | 0.37                   | 5.53                | 0.27                    | 2.77                 | 8.30                    |
| CFD         | X_12802                     | 0.19                   | 1.74                | 0.43                    | 6.55                 | 8.30                    |
| RNASE1      | one_eicosatrienoyl_GPC      | -0.23                  | 2.27                | -0.41                   | 6.02                 | 8.29                    |
| CAT         | methionine                  | 0.29                   | 3.51                | 0.37                    | 4.78                 | 8.29                    |
| FCGBP       | one_eicosatrienoyl_GPC      | -0.27                  | 3.03                | -0.38                   | 5.25                 | 8.28                    |
| FCGBP       | one_five_anhydroglucitol    | -0.27                  | 3.07                | -0.38                   | 5.21                 | 8.28                    |
| SAA1        | DHEA_S                      | 0.36                   | 5.22                | 0.29                    | 3.06                 | 8.27                    |
| TTR         | alpha_hydroxyisovalerate    | -0.39                  | 6.17                | -0.23                   | 2.10                 | 8.27                    |
| AFM         | one_linoleoyl_GPC           | 0.35                   | 4.91                | 0.30                    | 3.37                 | 8.27                    |
| APOD        | X_05907                     | 0.34                   | 4.64                | 0.32                    | 3.63                 | 8.27                    |
| FGA         | citrulline                  | -0.38                  | 5.76                | -0.26                   | 2.51                 | 8.27                    |
| SPINK1      | X_12695                     | 0.35                   | 4.90                | 0.30                    | 3.37                 | 8.26                    |
| PLG         | pseudouridine               | -0.19                  | 1.65                | -0.43                   | 6.61                 | 8.26                    |
| CFHR2       | quinat                      | 0.38                   | 5.77                | 0.26                    | 2.49                 | 8.26                    |
| SERPINF1    | X_11838                     | 0.24                   | 2.46                | 0.41                    | 5.80                 | 8.26                    |
| APOA4       | threitol                    | 0.34                   | 4.61                | 0.32                    | 3.65                 | 8.26                    |
| APOL1       | X_12802                     | -0.39                  | 6.04                | -0.24                   | 2.22                 | 8.25                    |
| ORM1        | alanine                     | -0.16                  | 1.31                | -0.44                   | 6.94                 | 8.25                    |
| LBP         | X_12510                     | -0.34                  | 4.71                | -0.31                   | 3.54                 | 8.25                    |
| ITIH1       | X_05907                     | 0.22                   | 2.15                | 0.42                    | 6.10                 | 8.25                    |
| FCGBP       | HPLA                        | 0.43                   | 7.32                | 0.14                    | 0.92                 | 8.25                    |
| C9          | X_10395                     | -0.24                  | 2.57                | -0.40                   | 5.67                 | 8.25                    |
| IGFBP4      | N_acetylthreonine           | 0.43                   | 7.40                | 0.13                    | 0.85                 | 8.25                    |
| VWF         | xanthine                    | 0.35                   | 4.87                | 0.30                    | 3.38                 | 8.25                    |
| LRG1        | alanine                     | -0.19                  | 1.65                | -0.43                   | 6.59                 | 8.24                    |
| APOA4       | X_10359                     | 0.32                   | 4.21                | 0.33                    | 4.03                 | 8.24                    |
| B2M         | four_methyl_2_oxopentanoate | -0.34                  | 4.60                | -0.32                   | 3.64                 | 8.24                    |
| APCS        | X_12850                     | -0.39                  | 6.06                | -0.24                   | 2.17                 | 8.23                    |
| AHSG        | N_acetylalanine             | -0.32                  | 4.12                | -0.34                   | 4.11                 | 8.23                    |
| RBP4        | X_11437                     | 0.29                   | 3.57                | 0.36                    | 4.65                 | 8.23                    |
| PLG         | one_methyladenosine         | -0.23                  | 2.40                | -0.41                   | 5.83                 | 8.23                    |
| ORM2        | N_acetylthreonine           | 0.39                   | 5.97                | 0.24                    | 2.26                 | 8.22                    |

| gene symbol | metabolite                        | t0 Pearson Correlation | t0 NegLog10 p-value | t24 Pearson Correlation | t24 NegLog10 p-value | Sum of NegLog10 p-value |
|-------------|-----------------------------------|------------------------|---------------------|-------------------------|----------------------|-------------------------|
| LCN2        | pyridoxate                        | 0.30                   | 3.61                | 0.36                    | 4.61                 | 8.22                    |
| F12         | X_11445                           | -0.36                  | 5.35                | -0.28                   | 2.87                 | 8.22                    |
| ORM2        | three_cysteine_S_yl_acetaminophen | 0.37                   | 5.58                | 0.26                    | 2.64                 | 8.21                    |
| LUM         | SDMA                              | 0.30                   | 3.61                | 0.36                    | 4.60                 | 8.21                    |
| CD14        | X_12688                           | 0.26                   | 2.83                | 0.39                    | 5.38                 | 8.21                    |
| SEPP1       | alpha_hydroxyisovalerate          | -0.32                  | 4.25                | -0.33                   | 3.96                 | 8.21                    |
| LUM         | X_12217                           | 0.34                   | 4.77                | 0.31                    | 3.44                 | 8.21                    |
| RBP4        | X_05522                           | 0.16                   | 1.29                | 0.44                    | 6.91                 | 8.21                    |
| TF          | mannose                           | -0.26                  | 2.97                | -0.38                   | 5.23                 | 8.20                    |
| AFM         | histidine                         | 0.31                   | 3.87                | 0.35                    | 4.33                 | 8.20                    |
| AFM         | X_10483                           | -0.37                  | 5.60                | -0.26                   | 2.60                 | 8.20                    |
| ITIH2       | X_10395                           | 0.35                   | 4.99                | 0.30                    | 3.21                 | 8.20                    |
| VASN        | X_04504                           | 0.30                   | 3.71                | 0.35                    | 4.49                 | 8.20                    |
| APOL1       | N_acetylaniline                   | -0.40                  | 6.54                | -0.20                   | 1.66                 | 8.20                    |
| CFD         | threonate                         | 0.33                   | 4.43                | 0.32                    | 3.77                 | 8.20                    |
| PGLYRP2     | one_oleoyl_GPC                    | 0.34                   | 4.66                | 0.31                    | 3.54                 | 8.20                    |
| REG1A       | X_04595                           | 0.26                   | 2.79                | 0.39                    | 5.41                 | 8.20                    |
| CAT         | HPLA                              | 0.17                   | 1.39                | 0.44                    | 6.81                 | 8.20                    |
| AHSG        | one_arachidoyl_GPC                | 0.29                   | 3.48                | 0.36                    | 4.71                 | 8.19                    |
| SERPINA6    | X_11786                           | -0.31                  | 3.88                | -0.35                   | 4.31                 | 8.19                    |
| S100A9      | mannitol                          | 0.27                   | 3.06                | 0.38                    | 5.13                 | 8.19                    |
| IGFBP4      | X_04629                           | 0.40                   | 6.28                | 0.22                    | 1.91                 | 8.19                    |
| APOA4       | creatinine                        | 0.38                   | 5.67                | 0.26                    | 2.51                 | 8.19                    |
| VSIG4       | erythronate                       | 0.36                   | 5.30                | 0.28                    | 2.88                 | 8.18                    |
| DEFA1       | butyrylcarnitine                  | 0.26                   | 2.86                | 0.39                    | 5.32                 | 8.18                    |
| CFHR2       | allantoin                         | 0.37                   | 5.62                | 0.26                    | 2.56                 | 8.18                    |
| GC          | X_11538                           | -0.23                  | 2.35                | -0.41                   | 5.82                 | 8.17                    |
| CES1        | ornithine                         | 0.32                   | 4.27                | 0.33                    | 3.90                 | 8.17                    |
| IGFBP4      | X_02249                           | 0.33                   | 4.39                | 0.32                    | 3.78                 | 8.17                    |
| VASN        | hippurate                         | 0.29                   | 3.51                | 0.36                    | 4.66                 | 8.17                    |
| CFHR2       | sucrose                           | 0.30                   | 3.65                | 0.36                    | 4.52                 | 8.17                    |
| ORM2        | X_04629                           | 0.35                   | 4.91                | 0.30                    | 3.26                 | 8.17                    |
| S100A8      | acetylcarnitine                   | 0.38                   | 5.83                | 0.25                    | 2.34                 | 8.17                    |
| ORM1        | X_01327                           | -0.36                  | 5.31                | -0.28                   | 2.86                 | 8.17                    |
| REG1A       | X_12860                           | 0.29                   | 3.46                | 0.36                    | 4.71                 | 8.17                    |
| C1QC        | methionine                        | 0.31                   | 3.89                | 0.35                    | 4.27                 | 8.16                    |
| CFD         | prolylhydroxyproline              | 0.21                   | 2.01                | 0.42                    | 6.15                 | 8.16                    |
| APOC3       | erythritol                        | 0.34                   | 4.60                | 0.31                    | 3.56                 | 8.16                    |
| F12         | epiandrosterone_sulfate           | -0.33                  | 4.39                | -0.32                   | 3.77                 | 8.16                    |
| CFD         | X_13553                           | 0.29                   | 3.43                | 0.36                    | 4.73                 | 8.16                    |
| DEFA1       | erythronate                       | 0.24                   | 2.45                | 0.40                    | 5.71                 | 8.16                    |
| SPINK1      | phenylacetylglutamine             | 0.28                   | 3.23                | 0.37                    | 4.93                 | 8.16                    |
| BAI2        | one_stearoyl_GPC                  | -0.26                  | 2.95                | -0.38                   | 5.20                 | 8.15                    |
| AZGP1       | X_12794                           | 0.32                   | 4.25                | 0.33                    | 3.91                 | 8.15                    |
| FCGBP       | four_acetamidobutanoate           | 0.28                   | 3.21                | 0.37                    | 4.94                 | 8.15                    |
| PLG         | X_04499                           | -0.23                  | 2.28                | -0.41                   | 5.87                 | 8.15                    |
| GPX3        | X_12206                           | -0.34                  | 4.80                | -0.30                   | 3.35                 | 8.15                    |
| ORM2        | mannose                           | 0.35                   | 5.07                | 0.29                    | 3.07                 | 8.15                    |
| LCP1        | alpha_ketobutyrate                | 0.25                   | 2.66                | 0.39                    | 5.49                 | 8.15                    |
| LUM         | X_05426                           | 0.37                   | 5.63                | 0.26                    | 2.51                 | 8.14                    |
| B2M         | X_11175                           | 0.32                   | 4.26                | 0.33                    | 3.88                 | 8.14                    |
| AZGP1       | X_06126                           | 0.35                   | 4.92                | 0.30                    | 3.22                 | 8.14                    |
| VASN        | X_05522                           | 0.34                   | 4.60                | 0.31                    | 3.54                 | 8.13                    |
| C1QB        | X_12100                           | 0.41                   | 6.66                | 0.19                    | 1.48                 | 8.13                    |
| SAA4        | cholesterol                       | 0.21                   | 1.94                | 0.42                    | 6.19                 | 8.13                    |
| CST3        | X_11850                           | 0.26                   | 2.96                | 0.38                    | 5.17                 | 8.13                    |

| gene symbol | metabolite                       | t0 Pearson Correlation | t0 NegLog10 p-value | t24 Pearson Correlation | t24 NegLog10 p-value | Sum of NegLog10 p-value |
|-------------|----------------------------------|------------------------|---------------------|-------------------------|----------------------|-------------------------|
| CES1        | X_11175                          | 0.26                   | 2.98                | 0.38                    | 5.15                 | 8.13                    |
| VASN        | tryptophan                       | -0.43                  | 7.36                | -0.12                   | 0.77                 | 8.13                    |
| FCGBP       | tiglyl_carnitine                 | 0.30                   | 3.79                | 0.35                    | 4.34                 | 8.13                    |
| PTGDS       | X_11470                          | 0.20                   | 1.89                | 0.42                    | 6.23                 | 8.13                    |
| FABP1       | taurochenodeoxycholate           | 0.13                   | 0.97                | 0.45                    | 7.16                 | 8.13                    |
| APOC3       | urate                            | 0.31                   | 3.85                | 0.35                    | 4.27                 | 8.12                    |
| FBLN1       | arabitol                         | 0.30                   | 3.71                | 0.35                    | 4.41                 | 8.12                    |
| REG1A       | X_14658                          | 0.35                   | 4.88                | 0.30                    | 3.24                 | 8.12                    |
| CFHR2       | SDMA                             | 0.36                   | 5.22                | 0.28                    | 2.89                 | 8.11                    |
| SERPINC1    | one_linoleoyl_GPC                | 0.24                   | 2.59                | 0.40                    | 5.52                 | 8.11                    |
| SAA1        | X_11444                          | 0.34                   | 4.72                | 0.30                    | 3.39                 | 8.11                    |
| SPINK1      | X_04504                          | 0.40                   | 6.41                | 0.20                    | 1.69                 | 8.11                    |
| AHSG        | beta_hydroxyisovalerate          | -0.34                  | 4.71                | -0.31                   | 3.40                 | 8.11                    |
| PON1        | X_11538                          | -0.34                  | 4.80                | -0.30                   | 3.31                 | 8.11                    |
| LUM         | X_04504                          | 0.34                   | 4.58                | 0.31                    | 3.53                 | 8.11                    |
| GPX3        | arabitol                         | -0.33                  | 4.32                | -0.32                   | 3.78                 | 8.10                    |
| SERPINF1    | X_04499                          | 0.39                   | 6.02                | 0.23                    | 2.08                 | 8.10                    |
| SERPINF1    | X_11429                          | 0.30                   | 3.63                | 0.35                    | 4.46                 | 8.10                    |
| C1QB        | one_arachidoyl_GPE               | -0.31                  | 4.00                | -0.34                   | 4.10                 | 8.10                    |
| APOH        | CMPF                             | 0.34                   | 4.72                | 0.30                    | 3.38                 | 8.10                    |
| PTGDS       | two_hydroxyacetaminophen_sulfate | 0.22                   | 2.22                | 0.41                    | 5.88                 | 8.10                    |
| SPINK1      | X_11593                          | 0.25                   | 2.68                | 0.39                    | 5.41                 | 8.10                    |
| LGALS3BP    | tyrosine                         | 0.35                   | 4.98                | 0.29                    | 3.11                 | 8.09                    |
| ICAM2       | glycocholate                     | 0.32                   | 4.08                | 0.33                    | 4.02                 | 8.09                    |
| C1QA        | one_methylimidazoleacetate       | 0.32                   | 4.25                | 0.33                    | 3.84                 | 8.09                    |
| PLG         | X_12794                          | -0.13                  | 1.00                | -0.45                   | 7.09                 | 8.09                    |
| CFD         | X_12099                          | 0.33                   | 4.52                | 0.31                    | 3.57                 | 8.09                    |
| AFP         | pipecolate                       | 0.38                   | 5.78                | 0.24                    | 2.30                 | 8.08                    |
| GPX3        | pseudouridine                    | -0.36                  | 5.28                | -0.27                   | 2.80                 | 8.08                    |
| ORM2        | gulono_1_4_lactone               | 0.36                   | 5.19                | 0.28                    | 2.89                 | 8.08                    |
| FBLN1       | X_10359                          | 0.32                   | 4.19                | 0.33                    | 3.89                 | 8.08                    |
| FBLN1       | xylonate                         | 0.30                   | 3.77                | 0.35                    | 4.31                 | 8.08                    |
| LUM         | taurocholate                     | 0.29                   | 3.43                | 0.36                    | 4.65                 | 8.07                    |
| TTR         | catechol_sulfate                 | 0.31                   | 3.87                | 0.34                    | 4.20                 | 8.07                    |
| ORM1        | two_palmitoyl_GPC                | -0.39                  | 6.19                | -0.22                   | 1.88                 | 8.07                    |
| GPX3        | hexadecanedioate                 | 0.36                   | 5.31                | 0.27                    | 2.75                 | 8.06                    |
| FBLN1       | gulono_1_4_lactone               | 0.30                   | 3.62                | 0.35                    | 4.44                 | 8.06                    |
| COL3A1      | pipecolate                       | 0.26                   | 2.86                | 0.38                    | 5.20                 | 8.06                    |
| SHBG        | X_12794                          | -0.32                  | 4.12                | -0.33                   | 3.93                 | 8.06                    |
| PON1        | one_arachidoyl_GPE               | 0.35                   | 4.84                | 0.30                    | 3.21                 | 8.06                    |
| CRP         | tryptophan                       | -0.34                  | 4.63                | -0.31                   | 3.43                 | 8.06                    |
| S100A8      | X_04507                          | 0.37                   | 5.49                | 0.26                    | 2.56                 | 8.05                    |
| GPX3        | X_12742                          | -0.30                  | 3.66                | -0.35                   | 4.40                 | 8.05                    |
| SERPIND1    | X_14658                          | -0.37                  | 5.62                | -0.25                   | 2.43                 | 8.05                    |
| C1QB        | glycocholate                     | 0.41                   | 6.73                | 0.17                    | 1.32                 | 8.05                    |
| AFM         | X_05907                          | 0.31                   | 3.93                | 0.34                    | 4.11                 | 8.05                    |
| AZGP1       | N_acetylthreonine                | 0.37                   | 5.41                | 0.26                    | 2.63                 | 8.04                    |
| PON1        | HPLA                             | -0.36                  | 5.09                | -0.28                   | 2.94                 | 8.04                    |
| SPINK1      | X_04499                          | 0.39                   | 6.11                | 0.22                    | 1.93                 | 8.03                    |
| APOA1       | one_arachidoyl_GPC               | 0.22                   | 2.11                | 0.41                    | 5.93                 | 8.03                    |
| VWF         | one_oleoyl_GPC                   | -0.29                  | 3.58                | -0.35                   | 4.45                 | 8.03                    |
| APOL1       | X_13553                          | -0.42                  | 7.21                | -0.13                   | 0.82                 | 8.03                    |
| IGFBP4      | X_05426                          | 0.40                   | 6.36                | 0.20                    | 1.66                 | 8.03                    |
| LCN2        | urea                             | 0.33                   | 4.51                | 0.31                    | 3.52                 | 8.03                    |
| GPX3        | X_11429                          | -0.29                  | 3.58                | -0.35                   | 4.45                 | 8.03                    |
| B2M         | X_06126                          | 0.34                   | 4.75                | 0.30                    | 3.28                 | 8.03                    |

| gene symbol | metabolite                       | t0 Pearson Correlation | t0 NegLog10 p-value | t24 Pearson Correlation | t24 NegLog10 p-value | Sum of NegLog10 p-value |
|-------------|----------------------------------|------------------------|---------------------|-------------------------|----------------------|-------------------------|
| VASN        | X_12688                          | 0.25                   | 2.74                | 0.39                    | 5.29                 | 8.02                    |
| APCS        | hexadecanedioate                 | -0.37                  | 5.39                | -0.26                   | 2.63                 | 8.02                    |
| SERPINF1    | N_acetylaniline                  | 0.30                   | 3.78                | 0.34                    | 4.24                 | 8.02                    |
| APOL1       | X_06346                          | 0.37                   | 5.40                | 0.26                    | 2.62                 | 8.02                    |
| LUM         | four_acetamidobutanoate          | 0.31                   | 3.97                | 0.34                    | 4.05                 | 8.02                    |
| PON1        | octanoylcarnitine                | -0.29                  | 3.53                | -0.35                   | 4.49                 | 8.02                    |
| APOA4       | X_12695                          | 0.36                   | 5.09                | 0.28                    | 2.92                 | 8.02                    |
| DEFA1       | pseudouridine                    | 0.24                   | 2.44                | 0.40                    | 5.58                 | 8.02                    |
| VWF         | X_12644                          | -0.24                  | 2.48                | -0.40                   | 5.53                 | 8.01                    |
| REG1A       | tiglyl_carnitine                 | 0.26                   | 2.86                | 0.38                    | 5.15                 | 8.01                    |
| CLU         | one_arachidoyl_GPE               | 0.26                   | 2.98                | 0.38                    | 5.03                 | 8.01                    |
| S100A9      | X_11429                          | 0.37                   | 5.43                | 0.26                    | 2.58                 | 8.01                    |
| LUM         | hippurate                        | 0.36                   | 5.24                | 0.27                    | 2.77                 | 8.01                    |
| AZGP1       | X_13553                          | 0.36                   | 5.15                | 0.28                    | 2.86                 | 8.01                    |
| C1QB        | X_04499                          | 0.43                   | 7.38                | 0.10                    | 0.63                 | 8.01                    |
| REG1A       | isobutyrylcarnitine              | 0.26                   | 2.93                | 0.38                    | 5.07                 | 8.00                    |
| FABP1       | proline                          | 0.30                   | 3.63                | 0.35                    | 4.37                 | 8.00                    |
| ECM1        | tyrosine                         | 0.35                   | 4.92                | 0.29                    | 3.08                 | 8.00                    |
| SAA3P       | proline                          | -0.27                  | 3.06                | -0.37                   | 4.94                 | 8.00                    |
| SERPINC1    | hexanoylcarnitine                | -0.32                  | 4.29                | -0.32                   | 3.71                 | 8.00                    |
| SERPINC1    | X_12855                          | 0.34                   | 4.81                | 0.29                    | 3.19                 | 8.00                    |
| ORM2        | X_11687                          | 0.26                   | 2.94                | 0.38                    | 5.06                 | 8.00                    |
| CRP         | three_cystein_S_yl_acetaminophen | 0.31                   | 3.95                | 0.34                    | 4.04                 | 7.99                    |
| TF          | threonine                        | 0.18                   | 1.63                | 0.42                    | 6.36                 | 7.99                    |
| SERPIND1    | one_arachidoyl_GPE               | 0.41                   | 6.72                | 0.17                    | 1.27                 | 7.99                    |
| APOC3       | xylonate                         | 0.33                   | 4.43                | 0.31                    | 3.56                 | 7.99                    |
| VTN         | X_12217                          | -0.28                  | 3.37                | -0.36                   | 4.62                 | 7.99                    |
| APOL1       | X_14658                          | -0.44                  | 7.84                | -0.03                   | 0.15                 | 7.99                    |
| CST3        | decanoylcarnitine                | 0.36                   | 5.15                | 0.28                    | 2.83                 | 7.99                    |
| A1BG        | beta_hydroxyisovalerate          | -0.28                  | 3.22                | -0.37                   | 4.77                 | 7.99                    |
| VSIG4       | three_hydroxy_2_ethylpropionate  | 0.37                   | 5.43                | 0.26                    | 2.56                 | 7.99                    |
| APOC4       | X_06346                          | 0.40                   | 6.32                | 0.20                    | 1.66                 | 7.99                    |
| GC          | X_11421                          | -0.30                  | 3.67                | -0.35                   | 4.31                 | 7.98                    |
| AHSG        | two_methylbutyrylcarnitine       | -0.35                  | 4.95                | -0.29                   | 3.03                 | 7.98                    |
| ORM2        | citrate                          | -0.38                  | 5.93                | -0.23                   | 2.05                 | 7.98                    |
| FGA         | androsterone_sulfate             | 0.35                   | 4.98                | 0.28                    | 3.00                 | 7.98                    |
| PGLYRP2     | one_linoleoyl_GPC                | 0.33                   | 4.54                | 0.31                    | 3.44                 | 7.98                    |
| ECM1        | citrate                          | 0.33                   | 4.31                | 0.32                    | 3.67                 | 7.98                    |
| ADIPOQ      | arabitol                         | 0.36                   | 5.28                | 0.27                    | 2.70                 | 7.98                    |
| S100A8      | pseudouridine                    | 0.38                   | 5.93                | 0.23                    | 2.04                 | 7.98                    |
| COL11A2     | one_palmitoleoyl_GPC             | 0.27                   | 3.03                | 0.37                    | 4.94                 | 7.98                    |
| VSIG4       | one_arachidoyl_GPC               | -0.28                  | 3.36                | -0.36                   | 4.61                 | 7.97                    |
| AHSG        | isobutyrylcarnitine              | -0.35                  | 4.89                | -0.29                   | 3.08                 | 7.97                    |
| LUM         | arabitol                         | 0.32                   | 4.20                | 0.32                    | 3.77                 | 7.97                    |
| LYZ         | N_acetylaniline                  | 0.44                   | 7.92                | 0.01                    | 0.05                 | 7.97                    |
| VTN         | X_12100                          | -0.28                  | 3.22                | -0.37                   | 4.75                 | 7.96                    |
| APOE        | X_14663                          | 0.30                   | 3.69                | 0.35                    | 4.27                 | 7.96                    |
| C7          | hexadecanedioate                 | 0.32                   | 4.07                | 0.33                    | 3.89                 | 7.96                    |
| LRG1        | one_eicosatrienoyl_GPC           | -0.36                  | 5.32                | -0.26                   | 2.64                 | 7.96                    |
| REG1A       | indolelactate                    | 0.24                   | 2.45                | 0.39                    | 5.51                 | 7.96                    |
| IGFBP4      | X_12217                          | 0.36                   | 5.22                | 0.27                    | 2.74                 | 7.96                    |
| SPINK1      | X_04629                          | 0.29                   | 3.51                | 0.35                    | 4.45                 | 7.96                    |
| CST3        | X_11521                          | 0.28                   | 3.39                | 0.36                    | 4.57                 | 7.95                    |
| KNR1        | two_palmitoyl_GPC                | 0.32                   | 4.09                | 0.33                    | 3.86                 | 7.95                    |
| C1QA        | glycochenodeoxycholate           | 0.38                   | 5.80                | 0.23                    | 2.15                 | 7.94                    |
| SPINK1      | X_05522                          | 0.28                   | 3.23                | 0.36                    | 4.72                 | 7.94                    |

| gene symbol | metabolite                  | t0 Pearson Correlation | t0 NegLog10 p-value | t24 Pearson Correlation | t24 NegLog10 p-value | Sum of NegLog10 p-value |
|-------------|-----------------------------|------------------------|---------------------|-------------------------|----------------------|-------------------------|
| ITIH2       | tiglyl_carnitine            | -0.29                  | 3.46                | -0.35                   | 4.48                 | 7.94                    |
| SERPINA1    | mannose                     | 0.25                   | 2.72                | 0.38                    | 5.22                 | 7.94                    |
| HRG         | one_stearoyl_GPC            | 0.32                   | 4.14                | 0.32                    | 3.80                 | 7.94                    |
| PGLYRP2     | two_methylbutyroylcarnitine | -0.27                  | 3.14                | -0.37                   | 4.79                 | 7.94                    |
| FBLN1       | X_12695                     | 0.28                   | 3.23                | 0.36                    | 4.71                 | 7.94                    |
| HRG         | X_12802                     | -0.36                  | 5.25                | -0.27                   | 2.68                 | 7.93                    |
| FN1         | X_12510                     | 0.29                   | 3.61                | 0.35                    | 4.32                 | 7.93                    |
| REG1A       | N_acetylneuramate           | 0.27                   | 3.16                | 0.37                    | 4.76                 | 7.92                    |
| APOA2       | X_11538                     | -0.35                  | 4.85                | -0.29                   | 3.07                 | 7.92                    |
| CD14        | one_palmitoleoyl_GPC        | -0.28                  | 3.34                | -0.36                   | 4.58                 | 7.92                    |
| COL3A1      | X_10395                     | -0.24                  | 2.47                | -0.39                   | 5.45                 | 7.92                    |
| RNASE1      | CMPF                        | 0.33                   | 4.51                | 0.31                    | 3.41                 | 7.92                    |
| SAA4        | X_05907                     | 0.35                   | 5.06                | 0.28                    | 2.86                 | 7.92                    |
| C7          | X_10395                     | -0.41                  | 6.74                | -0.16                   | 1.18                 | 7.92                    |
| SERPINC1    | taurochenodeoxycholate      | -0.35                  | 4.83                | -0.29                   | 3.09                 | 7.92                    |
| LCN2        | hydroxyisovaleroylcarnitine | 0.29                   | 3.59                | 0.35                    | 4.33                 | 7.92                    |
| APOC3       | gluconate                   | 0.37                   | 5.38                | 0.26                    | 2.53                 | 7.91                    |
| CES1        | gamma_glutamylphenylalanine | 0.11                   | 0.70                | 0.45                    | 7.21                 | 7.91                    |
| APOC3       | X_03951                     | 0.28                   | 3.29                | 0.36                    | 4.62                 | 7.91                    |
| PLG         | tryptophan                  | 0.34                   | 4.62                | 0.30                    | 3.29                 | 7.91                    |
| SERPINF1    | X_12742                     | 0.25                   | 2.63                | 0.39                    | 5.28                 | 7.91                    |
| VASN        | X_12104                     | 0.37                   | 5.39                | 0.26                    | 2.52                 | 7.91                    |
| AFM         | X_12802                     | -0.37                  | 5.46                | -0.25                   | 2.45                 | 7.91                    |
| LUM         | X_10359                     | 0.30                   | 3.75                | 0.34                    | 4.16                 | 7.91                    |
| VWF         | lactate                     | 0.37                   | 5.45                | 0.25                    | 2.46                 | 7.91                    |
| FCGBP       | erythritol                  | 0.29                   | 3.46                | 0.35                    | 4.44                 | 7.90                    |
| HPX         | seven_HOCA                  | -0.27                  | 3.14                | -0.37                   | 4.76                 | 7.90                    |
| APOE        | X_03094                     | 0.34                   | 4.59                | 0.30                    | 3.31                 | 7.90                    |
| ITIH2       | one_palmitoyl_GPC           | 0.34                   | 4.67                | 0.30                    | 3.23                 | 7.90                    |
| PLG         | X_12860                     | -0.08                  | 0.51                | -0.46                   | 7.39                 | 7.90                    |
| APOD        | X_03094                     | 0.34                   | 4.72                | 0.29                    | 3.18                 | 7.90                    |
| APOA4       | X_04507                     | 0.35                   | 5.02                | 0.28                    | 2.88                 | 7.90                    |
| APOA2       | two_methylbutyroylcarnitine | -0.38                  | 5.65                | -0.24                   | 2.24                 | 7.90                    |
| ORM1        | X_11687                     | 0.28                   | 3.34                | 0.36                    | 4.55                 | 7.89                    |
| FN1         | X_04357                     | 0.15                   | 1.22                | 0.43                    | 6.67                 | 7.89                    |
| LBP         | X_11786                     | -0.29                  | 3.52                | -0.35                   | 4.37                 | 7.89                    |
| ITIH1       | HPLA                        | -0.33                  | 4.51                | -0.30                   | 3.38                 | 7.89                    |
| CFH         | X_12510                     | 0.29                   | 3.44                | 0.35                    | 4.45                 | 7.89                    |
| AHSG        | two_palmitoyl_GPC           | 0.30                   | 3.78                | 0.34                    | 4.11                 | 7.89                    |
| FBLN1       | erythronate                 | 0.27                   | 3.17                | 0.36                    | 4.72                 | 7.89                    |
| AFP         | tyrosine                    | 0.38                   | 5.67                | 0.24                    | 2.22                 | 7.88                    |
| REG1A       | X_11593                     | 0.26                   | 2.94                | 0.37                    | 4.94                 | 7.88                    |
| PGLYRP2     | N_acetylalanine             | -0.28                  | 3.35                | -0.36                   | 4.54                 | 7.88                    |
| ORM2        | X_11334                     | 0.25                   | 2.67                | 0.38                    | 5.21                 | 7.88                    |
| REG1A       | N_acetylthreonine           | 0.32                   | 4.11                | 0.32                    | 3.77                 | 7.88                    |
| RNASE1      | tryptophan                  | -0.34                  | 4.59                | -0.30                   | 3.28                 | 7.87                    |
| ICAM2       | betaine                     | 0.35                   | 5.05                | 0.27                    | 2.82                 | 7.87                    |
| CFD         | X_04595                     | 0.19                   | 1.64                | 0.42                    | 6.22                 | 7.87                    |
| LBP         | N_acetylneuramate           | 0.37                   | 5.36                | 0.26                    | 2.50                 | 7.87                    |
| GPX3        | erythronate                 | -0.34                  | 4.63                | -0.30                   | 3.24                 | 7.86                    |
| IGFBP4      | X_12099                     | 0.38                   | 5.93                | 0.22                    | 1.94                 | 7.86                    |
| RBP4        | one_stearoylglycerol        | 0.35                   | 4.84                | 0.29                    | 3.02                 | 7.86                    |
| CP          | laurylcarnitine             | 0.34                   | 4.64                | 0.30                    | 3.21                 | 7.86                    |
| LCN2        | one_palmitoleoyl_GPC        | -0.17                  | 1.41                | -0.43                   | 6.45                 | 7.86                    |
| APOC3       | X_11315                     | -0.30                  | 3.75                | -0.34                   | 4.10                 | 7.86                    |
| APOC1       | one_palmitoyl_GPC           | 0.29                   | 3.42                | 0.35                    | 4.44                 | 7.86                    |



| gene symbol | metabolite                      | t0 Pearson Correlation | t0 NegLog10 p-value | t24 Pearson Correlation | t24 NegLog10 p-value | Sum of NegLog10 p-value |
|-------------|---------------------------------|------------------------|---------------------|-------------------------|----------------------|-------------------------|
| C1QB        | deoxycarnitine                  | 0.39                   | 6.05                | 0.21                    | 1.81                 | 7.85                    |
| LUM         | phosphate                       | 0.32                   | 4.16                | 0.32                    | 3.70                 | 7.85                    |
| APOA4       | X_10395                         | 0.29                   | 3.51                | 0.35                    | 4.34                 | 7.85                    |
| CPN2        | X_11510                         | -0.34                  | 4.71                | -0.29                   | 3.13                 | 7.85                    |
| VASN        | X_04629                         | 0.32                   | 4.20                | 0.32                    | 3.64                 | 7.85                    |
| SAA3P       | N_acetylalanine                 | 0.37                   | 5.44                | 0.25                    | 2.40                 | 7.84                    |
| AZGP1       | prolylhydroxyproline            | 0.29                   | 3.42                | 0.35                    | 4.42                 | 7.84                    |
| AZGP1       | gluconate                       | 0.41                   | 6.83                | 0.15                    | 1.01                 | 7.84                    |
| APOA2       | acetylcarnitine                 | -0.34                  | 4.62                | -0.30                   | 3.21                 | 7.83                    |
| VASN        | X_04499                         | 0.34                   | 4.79                | 0.29                    | 3.04                 | 7.83                    |
| PON1        | X_11510                         | -0.26                  | 2.79                | -0.38                   | 5.04                 | 7.83                    |
| RBMX        | hexadecanedioate                | 0.23                   | 2.38                | 0.39                    | 5.45                 | 7.83                    |
| IGFBP4      | X_12794                         | 0.39                   | 6.20                | 0.20                    | 1.63                 | 7.83                    |
| KNG1        | one_linoleoyl_GPC               | 0.29                   | 3.52                | 0.35                    | 4.31                 | 7.83                    |
| LCN2        | three_hydroxy_2_ethylpropionate | 0.30                   | 3.63                | 0.34                    | 4.20                 | 7.83                    |
| F12         | X_11440                         | -0.35                  | 5.01                | -0.27                   | 2.82                 | 7.83                    |
| CD14        | four_acetamidobutanoate         | 0.30                   | 3.67                | 0.34                    | 4.16                 | 7.83                    |
| C1QC        | taurochenodeoxycholate          | 0.36                   | 5.24                | 0.26                    | 2.58                 | 7.83                    |
| CFHR2       | X_11444                         | 0.30                   | 3.82                | 0.33                    | 4.01                 | 7.82                    |
| TTR         | piperine                        | 0.27                   | 3.05                | 0.37                    | 4.77                 | 7.82                    |
| C4BPB       | taurochenodeoxycholate          | -0.35                  | 4.83                | -0.28                   | 3.00                 | 7.82                    |
| COL1A1      | allantoin                       | 0.38                   | 5.70                | 0.23                    | 2.12                 | 7.82                    |
| VSIG4       | X_12688                         | 0.29                   | 3.59                | 0.34                    | 4.22                 | 7.81                    |
| CST3        | scyllo_inositol                 | 0.33                   | 4.33                | 0.31                    | 3.49                 | 7.81                    |
| ACTA2       | mannose                         | -0.22                  | 2.10                | -0.40                   | 5.72                 | 7.81                    |
| RBP4        | arabinose                       | 0.23                   | 2.36                | 0.39                    | 5.45                 | 7.81                    |
| AHSG        | X_10483                         | -0.33                  | 4.48                | -0.30                   | 3.33                 | 7.81                    |
| ECM1        | alpha_hydroxyisovalerate        | 0.28                   | 3.37                | 0.35                    | 4.44                 | 7.81                    |
| SPINK1      | X_12099                         | 0.36                   | 5.14                | 0.27                    | 2.67                 | 7.81                    |
| HRG         | butyrylcarnitine                | -0.31                  | 4.01                | -0.32                   | 3.80                 | 7.81                    |
| S100A8      | N6_carbamoylthreonyladenosine   | 0.34                   | 4.65                | 0.29                    | 3.16                 | 7.81                    |
| VWF         | X_12442                         | 0.30                   | 3.63                | 0.34                    | 4.17                 | 7.81                    |
| LUM         | N2_N2_dimethylguanosine         | 0.31                   | 3.93                | 0.33                    | 3.88                 | 7.80                    |
| ULK4        | glycocholate                    | -0.42                  | 6.92                | -0.13                   | 0.88                 | 7.80                    |
| SPINK1      | one_five_anhydroglucitol        | -0.24                  | 2.50                | -0.39                   | 5.30                 | 7.80                    |
| CFD         | X_11444                         | 0.25                   | 2.63                | 0.38                    | 5.17                 | 7.80                    |
| APOC4       | X_03094                         | 0.38                   | 5.78                | 0.23                    | 2.02                 | 7.80                    |
| APOC3       | X_12405                         | 0.33                   | 4.41                | 0.30                    | 3.39                 | 7.80                    |
| S100A8      | erythronate                     | 0.36                   | 5.21                | 0.26                    | 2.58                 | 7.80                    |
| ITIH2       | N_acetylneuraminate             | -0.33                  | 4.32                | -0.31                   | 3.47                 | 7.79                    |
| CD14        | phenylacetylglutamine           | 0.25                   | 2.78                | 0.38                    | 5.01                 | 7.79                    |
| COPB1       | taurochenodeoxycholate          | 0.29                   | 3.59                | 0.34                    | 4.20                 | 7.79                    |
| VSIG4       | X_12794                         | 0.41                   | 6.79                | 0.14                    | 0.99                 | 7.79                    |
| VSIG4       | deoxycarnitine                  | 0.34                   | 4.67                | 0.29                    | 3.11                 | 7.78                    |
| APOA1       | X_10500                         | 0.32                   | 4.28                | 0.31                    | 3.51                 | 7.78                    |
| COPB1       | glycochenodeoxycholate          | 0.36                   | 5.27                | 0.26                    | 2.51                 | 7.78                    |
| LRG1        | tyrosine                        | -0.28                  | 3.32                | -0.35                   | 4.46                 | 7.78                    |
| APOL1       | SDMA                            | -0.39                  | 5.95                | -0.21                   | 1.83                 | 7.78                    |
| KNG1        | X_06346                         | 0.34                   | 4.61                | 0.29                    | 3.17                 | 7.78                    |
| F12         | X_03056                         | -0.37                  | 5.56                | -0.24                   | 2.22                 | 7.78                    |
| ADIPOQ      | pyridoxate                      | 0.35                   | 4.99                | 0.27                    | 2.78                 | 7.78                    |
| SPINK1      | X_03056                         | 0.28                   | 3.28                | 0.35                    | 4.49                 | 7.78                    |
| REG1A       | X_04629                         | 0.27                   | 3.10                | 0.36                    | 4.68                 | 7.78                    |
| F12         | DHEA_S                          | -0.34                  | 4.78                | -0.28                   | 2.99                 | 7.78                    |
| ORM1        | one_methyladenosine             | 0.30                   | 3.73                | 0.34                    | 4.05                 | 7.77                    |
| SPINK1      | X_12405                         | 0.26                   | 2.85                | 0.37                    | 4.92                 | 7.77                    |

| gene symbol | metabolite                       | t0 Pearson Correlation | t0 NegLog10 p-value | t24 Pearson Correlation | t24 NegLog10 p-value | Sum of NegLog10 p-value |
|-------------|----------------------------------|------------------------|---------------------|-------------------------|----------------------|-------------------------|
| C7          | X_04498                          | 0.32                   | 4.14                | 0.32                    | 3.63                 | 7.77                    |
| APOA4       | X_11423                          | 0.35                   | 4.83                | 0.28                    | 2.94                 | 7.77                    |
| ITIH3       | tryptophan                       | -0.28                  | 3.27                | -0.35                   | 4.49                 | 7.77                    |
| SERPINF1    | X_12101                          | 0.31                   | 3.86                | 0.33                    | 3.91                 | 7.76                    |
| LYZ         | X_11261                          | 0.43                   | 7.27                | 0.09                    | 0.49                 | 7.76                    |
| LRG1        | one_arachidoyl_GPE               | -0.35                  | 4.85                | -0.28                   | 2.91                 | 7.76                    |
| TTR         | one_palmitoleoyl_GPC             | 0.34                   | 4.63                | 0.29                    | 3.12                 | 7.76                    |
| ORM2        | caffeine                         | -0.25                  | 2.68                | -0.38                   | 5.07                 | 7.75                    |
| CAT         | aspartate                        | 0.11                   | 0.73                | 0.45                    | 7.02                 | 7.75                    |
| SAA1        | tyrosine                         | -0.29                  | 3.39                | -0.35                   | 4.36                 | 7.75                    |
| APOA1       | X_04499                          | -0.29                  | 3.49                | -0.34                   | 4.26                 | 7.75                    |
| CST3        | X_10395                          | -0.43                  | 7.26                | -0.09                   | 0.49                 | 7.75                    |
| COL11A2     | one_oleoyl_GPC                   | 0.28                   | 3.20                | 0.36                    | 4.54                 | 7.74                    |
| APOD        | palmitoylcarnitine               | 0.35                   | 4.84                | 0.28                    | 2.90                 | 7.74                    |
| LUM         | threitol                         | 0.33                   | 4.31                | 0.31                    | 3.43                 | 7.74                    |
| ORM1        | X_12742                          | 0.26                   | 2.85                | 0.37                    | 4.89                 | 7.74                    |
| APOC3       | X_12100                          | 0.29                   | 3.41                | 0.35                    | 4.33                 | 7.74                    |
| A1BG        | hydroxyisovaleroylcarnitine      | -0.29                  | 3.59                | -0.34                   | 4.15                 | 7.74                    |
| TF          | X_11786                          | 0.16                   | 1.28                | 0.43                    | 6.46                 | 7.74                    |
| S100A8      | X_04504                          | 0.37                   | 5.45                | 0.24                    | 2.29                 | 7.74                    |
| LCN2        | two_methylbutyrylcarnitine       | 0.32                   | 4.14                | 0.31                    | 3.59                 | 7.74                    |
| SERPINA6    | X_14626                          | 0.33                   | 4.49                | 0.30                    | 3.24                 | 7.73                    |
| ICAM2       | caffeine                         | 0.33                   | 4.45                | 0.30                    | 3.28                 | 7.73                    |
| VWF         | one_eicosatrienoyl_GPC           | -0.23                  | 2.37                | -0.39                   | 5.36                 | 7.73                    |
| SAA3P       | one_arachidoyl_GPE               | -0.39                  | 6.12                | -0.20                   | 1.61                 | 7.73                    |
| VTN         | X_11510                          | -0.31                  | 4.01                | -0.32                   | 3.72                 | 7.73                    |
| LUM         | proline                          | 0.25                   | 2.71                | 0.38                    | 5.02                 | 7.72                    |
| SERPINA6    | one_palmitoleoyl_GPC             | -0.36                  | 5.30                | -0.25                   | 2.42                 | 7.72                    |
| AFM         | prolylhydroxyproline             | -0.33                  | 4.38                | -0.30                   | 3.34                 | 7.72                    |
| CFHR2       | X_12802                          | 0.31                   | 3.85                | 0.33                    | 3.87                 | 7.72                    |
| PGLYRP2     | N_acetylthreonine                | -0.35                  | 4.94                | -0.27                   | 2.78                 | 7.72                    |
| FCGBP       | three_cystein_S_yl_acetaminophen | 0.05                   | 0.25                | 0.46                    | 7.47                 | 7.72                    |
| SPINK1      | X_11334                          | 0.31                   | 3.87                | 0.33                    | 3.85                 | 7.72                    |
| PLG         | N6_carbamoylthreonyladenosine    | -0.05                  | 0.30                | -0.46                   | 7.42                 | 7.71                    |
| FBLN1       | threitol                         | 0.31                   | 3.92                | 0.32                    | 3.79                 | 7.71                    |
| VASN        | X_12860                          | 0.28                   | 3.35                | 0.35                    | 4.36                 | 7.71                    |
| TIMP1       | hexanoylcarnitine                | 0.24                   | 2.54                | 0.38                    | 5.16                 | 7.71                    |
| VSIG4       | one_methylimidazoleacetate       | 0.34                   | 4.63                | 0.29                    | 3.08                 | 7.71                    |
| AFM         | X_11445                          | -0.33                  | 4.45                | -0.30                   | 3.25                 | 7.70                    |
| TTR         | HPLA                             | -0.40                  | 6.49                | -0.16                   | 1.22                 | 7.70                    |
| AHSG        | urea                             | -0.33                  | 4.41                | -0.30                   | 3.29                 | 7.70                    |
| FBLN1       | glutaroylcarnitine               | 0.32                   | 4.18                | 0.31                    | 3.52                 | 7.70                    |
| A1BG        | tiglyl_carnitine                 | -0.33                  | 4.38                | -0.30                   | 3.32                 | 7.70                    |
| SHBG        | gulono_1_4_lactone               | -0.36                  | 5.28                | -0.25                   | 2.42                 | 7.70                    |
| FCGBP       | X_04498                          | 0.35                   | 5.03                | 0.27                    | 2.67                 | 7.70                    |
| LCP1        | xanthine                         | 0.30                   | 3.68                | 0.33                    | 4.01                 | 7.69                    |
| LBP         | N_acetylalanine                  | 0.30                   | 3.77                | 0.33                    | 3.92                 | 7.69                    |
| PLG         | tiglyl_carnitine                 | -0.18                  | 1.54                | -0.42                   | 6.15                 | 7.69                    |
| LYZ         | sucrose                          | 0.37                   | 5.49                | 0.24                    | 2.20                 | 7.69                    |
| APOA4       | four_acetamidobutanoate          | 0.33                   | 4.37                | 0.30                    | 3.31                 | 7.68                    |
| AFM         | bilirubin                        | 0.34                   | 4.56                | 0.29                    | 3.13                 | 7.68                    |
| COPB1       | myristoleate                     | 0.23                   | 2.42                | 0.39                    | 5.26                 | 7.68                    |
| SPINK1      | X_11423                          | 0.30                   | 3.74                | 0.33                    | 3.94                 | 7.68                    |
| RBP4        | pseudouridine                    | 0.22                   | 2.12                | 0.40                    | 5.55                 | 7.68                    |
| LYZ         | SDMA                             | 0.41                   | 6.77                | 0.14                    | 0.91                 | 7.68                    |
| SHBG        | gluconate                        | -0.39                  | 6.04                | -0.20                   | 1.63                 | 7.67                    |

| gene symbol | metabolite                      | t0 Pearson Correlation | t0 NegLog10 p-value | t24 Pearson Correlation | t24 NegLog10 p-value | Sum of NegLog10 p-value |
|-------------|---------------------------------|------------------------|---------------------|-------------------------|----------------------|-------------------------|
| SERPINF1    | p_acetamidophenylglucuronide    | 0.20                   | 1.85                | 0.41                    | 5.83                 | 7.67                    |
| APOD        | one_stearoylglycerol            | 0.39                   | 6.03                | 0.20                    | 1.64                 | 7.67                    |
| LCP1        | three_hydroxy_2_ethylpropionate | 0.32                   | 4.12                | 0.31                    | 3.55                 | 7.67                    |
| CST3        | one_linoleoyl_GPC               | -0.28                  | 3.31                | -0.35                   | 4.35                 | 7.67                    |
| LBP         | four_acetaminophen_sulfate      | 0.24                   | 2.56                | 0.38                    | 5.10                 | 7.66                    |
| ORM1        | X_12510                         | -0.31                  | 3.95                | -0.32                   | 3.71                 | 7.66                    |
| CLU         | two_palmitoyl_GPC               | 0.32                   | 4.25                | 0.31                    | 3.41                 | 7.66                    |
| MB          | tiglyl_carnitine                | 0.35                   | 4.98                | 0.27                    | 2.68                 | 7.66                    |
| SPINK1      | X_12092                         | 0.35                   | 5.07                | 0.26                    | 2.58                 | 7.65                    |
| APOA2       | X_12802                         | -0.33                  | 4.40                | -0.30                   | 3.25                 | 7.65                    |
| ORM1        | seven_HOCA                      | -0.34                  | 4.71                | -0.28                   | 2.94                 | 7.65                    |
| AHSG        | X_13553                         | -0.35                  | 5.03                | -0.26                   | 2.63                 | 7.65                    |
| IGFBP4      | phenol_sulfate                  | 0.32                   | 4.10                | 0.31                    | 3.55                 | 7.65                    |
| APOA1       | X_08402                         | 0.37                   | 5.40                | 0.24                    | 2.25                 | 7.65                    |
| VASN        | X_12101                         | 0.25                   | 2.65                | 0.38                    | 5.00                 | 7.65                    |
| RNASE1      | gamma_glutamylleucine           | 0.29                   | 3.50                | 0.34                    | 4.14                 | 7.65                    |
| APOA4       | X_10266                         | 0.37                   | 5.57                | 0.23                    | 2.08                 | 7.65                    |
| ACTB        | tyrosine                        | 0.22                   | 2.16                | 0.39                    | 5.49                 | 7.65                    |
| APOC3       | X_12742                         | 0.33                   | 4.46                | 0.29                    | 3.18                 | 7.64                    |
| AFM         | X_11795                         | 0.26                   | 2.83                | 0.37                    | 4.82                 | 7.64                    |
| VTN         | gulono_1_4_lactone              | -0.25                  | 2.74                | -0.37                   | 4.90                 | 7.64                    |
| APOA4       | X_12405                         | 0.38                   | 5.75                | 0.22                    | 1.89                 | 7.64                    |
| ADIPOQ      | X_08889                         | 0.28                   | 3.19                | 0.35                    | 4.45                 | 7.64                    |
| C1QB        | gamma_glutamyltyrosine          | 0.36                   | 5.34                | 0.24                    | 2.30                 | 7.64                    |
| GC          | butyrylcarnitine                | -0.31                  | 4.00                | -0.32                   | 3.64                 | 7.64                    |
| TIMP1       | N_acetylalanine                 | 0.20                   | 1.78                | 0.41                    | 5.86                 | 7.64                    |
| APOA4       | X_12217                         | 0.35                   | 4.83                | 0.27                    | 2.80                 | 7.63                    |
| RNASE1      | urate                           | 0.33                   | 4.53                | 0.29                    | 3.10                 | 7.63                    |
| FGA         | mannose                         | 0.29                   | 3.43                | 0.34                    | 4.20                 | 7.63                    |
| ECM1        | HPLA                            | 0.32                   | 4.16                | 0.31                    | 3.47                 | 7.63                    |
| C1QA        | taurochenodeoxycholate          | 0.38                   | 5.68                | 0.22                    | 1.95                 | 7.63                    |
| APOA2       | X_10500                         | 0.27                   | 3.04                | 0.36                    | 4.59                 | 7.63                    |
| SERPINC1    | one_arachidoyl_GPC              | 0.25                   | 2.71                | 0.37                    | 4.91                 | 7.63                    |
| S100A8      | mannitol                        | 0.31                   | 4.02                | 0.31                    | 3.60                 | 7.63                    |
| SERPINF1    | X_12802                         | 0.30                   | 3.78                | 0.33                    | 3.85                 | 7.62                    |
| FN1         | threonine                       | 0.25                   | 2.76                | 0.37                    | 4.86                 | 7.62                    |
| APOC3       | X_02249                         | 0.23                   | 2.35                | 0.39                    | 5.27                 | 7.62                    |
| COPB1       | alpha_hydroxyisovalerate        | 0.35                   | 5.00                | 0.26                    | 2.62                 | 7.62                    |
| VTN         | X_10483                         | -0.25                  | 2.68                | -0.37                   | 4.94                 | 7.62                    |
| VSIG4       | erythritol                      | 0.34                   | 4.77                | 0.28                    | 2.84                 | 7.62                    |
| SPINK1      | X_12100                         | 0.35                   | 4.96                | 0.27                    | 2.66                 | 7.62                    |
| HRG         | one_arachidoyl_GPE              | 0.27                   | 3.13                | 0.35                    | 4.49                 | 7.61                    |
| AMBP        | three_methyl_2_oxobutyrate      | -0.30                  | 3.81                | -0.32                   | 3.80                 | 7.61                    |
| S100A9      | X_12860                         | 0.37                   | 5.39                | 0.24                    | 2.22                 | 7.61                    |
| ICAM2       | X_14658                         | 0.27                   | 3.13                | 0.35                    | 4.48                 | 7.61                    |
| SERPINA6    | one_linoleoyl_GPC               | -0.31                  | 3.98                | -0.32                   | 3.63                 | 7.61                    |
| AMBP        | one_stearoylglycerol            | 0.34                   | 4.69                | 0.28                    | 2.92                 | 7.61                    |
| RBP4        | glycerol_3_phosphate            | 0.32                   | 4.16                | 0.31                    | 3.44                 | 7.59                    |
| PTGDS       | X_11175                         | 0.33                   | 4.32                | 0.30                    | 3.27                 | 7.59                    |
| PLG         | X_11429                         | -0.18                  | 1.56                | -0.41                   | 6.03                 | 7.59                    |
| LUM         | myo_inositol                    | 0.33                   | 4.40                | 0.29                    | 3.19                 | 7.59                    |
| APOH        | taurocholate                    | -0.31                  | 3.96                | -0.32                   | 3.63                 | 7.59                    |
| APOC3       | erythrose                       | 0.34                   | 4.63                | 0.28                    | 2.96                 | 7.59                    |
| AZGP1       | CMPF                            | 0.32                   | 4.22                | 0.30                    | 3.37                 | 7.59                    |
| TTR         | one_eicosatrienoyl_GPC          | 0.30                   | 3.70                | 0.33                    | 3.89                 | 7.59                    |
| ADIPOQ      | glycerate                       | 0.29                   | 3.50                | 0.34                    | 4.09                 | 7.59                    |

| gene symbol | metabolite                       | t0 Pearson Correlation | t0 NegLog10 p-value | t24 Pearson Correlation | t24 NegLog10 p-value | Sum of NegLog10 p-value |
|-------------|----------------------------------|------------------------|---------------------|-------------------------|----------------------|-------------------------|
| SAA3P       | glutamate                        | -0.34                  | 4.71                | -0.28                   | 2.88                 | 7.59                    |
| GPX3        | octadecanedioate                 | 0.36                   | 5.14                | 0.25                    | 2.45                 | 7.59                    |
| SERPINA6    | three_hydroxy_2_ethylpropionate  | 0.38                   | 5.90                | 0.20                    | 1.68                 | 7.59                    |
| FGA         | X_11445                          | 0.35                   | 4.83                | 0.27                    | 2.76                 | 7.59                    |
| SERPIND1    | X_11491                          | -0.30                  | 3.77                | -0.32                   | 3.81                 | 7.58                    |
| S100A9      | X_12465                          | 0.34                   | 4.80                | 0.27                    | 2.79                 | 7.58                    |
| TF          | N_acetylaniline                  | -0.32                  | 4.21                | -0.30                   | 3.37                 | 7.58                    |
| SHBG        | creatinine                       | -0.33                  | 4.53                | -0.29                   | 3.05                 | 7.58                    |
| APOA2       | X_11317                          | 0.34                   | 4.59                | 0.28                    | 3.00                 | 7.58                    |
| LBP         | uridine                          | -0.42                  | 7.20                | -0.07                   | 0.39                 | 7.58                    |
| LBP         | glutamine                        | -0.30                  | 3.82                | -0.32                   | 3.76                 | 7.58                    |
| TLN1        | AMP                              | 0.37                   | 5.46                | 0.23                    | 2.11                 | 7.58                    |
| ORM1        | X_12405                          | 0.25                   | 2.66                | 0.37                    | 4.92                 | 7.58                    |
| RBMX        | taurocholate                     | 0.35                   | 4.90                | 0.27                    | 2.67                 | 7.57                    |
| C1QB        | one_palmitoyl_GPC                | -0.33                  | 4.37                | -0.29                   | 3.20                 | 7.57                    |
| VASN        | three_cystein_S_yl_acetaminophen | 0.36                   | 5.23                | 0.25                    | 2.34                 | 7.57                    |
| RNASE1      | one_methyladenosine              | 0.41                   | 6.62                | 0.14                    | 0.95                 | 7.57                    |
| VSIG4       | X_12802                          | 0.34                   | 4.62                | 0.28                    | 2.95                 | 7.57                    |
| RBMX        | X_14658                          | 0.31                   | 3.96                | 0.32                    | 3.61                 | 7.57                    |
| APOC3       | three_indoxyl_sulfate            | 0.30                   | 3.74                | 0.33                    | 3.83                 | 7.57                    |
| GC          | X_10395                          | 0.33                   | 4.31                | 0.30                    | 3.26                 | 7.57                    |
| LGALS3BP    | mannose                          | -0.33                  | 4.52                | -0.29                   | 3.04                 | 7.57                    |
| C1QB        | X_12458                          | 0.36                   | 5.33                | 0.24                    | 2.24                 | 7.57                    |
| ORM1        | X_06246                          | -0.21                  | 1.94                | -0.40                   | 5.63                 | 7.56                    |
| LYZ         | X_11315                          | -0.42                  | 7.02                | -0.09                   | 0.55                 | 7.56                    |
| APOC3       | X_12206                          | 0.28                   | 3.35                | 0.34                    | 4.21                 | 7.56                    |
| FABP1       | malate                           | 0.30                   | 3.65                | 0.33                    | 3.91                 | 7.56                    |
| AFM         | one_oleoyl_GPC                   | 0.31                   | 3.94                | 0.32                    | 3.62                 | 7.56                    |
| COL11A2     | hexanoylcarnitine                | -0.34                  | 4.79                | -0.27                   | 2.77                 | 7.56                    |
| C1QB        | one_arachidoyl_GPC               | -0.28                  | 3.20                | -0.35                   | 4.36                 | 7.55                    |
| ORM1        | arabitol                         | 0.31                   | 4.01                | 0.31                    | 3.53                 | 7.55                    |
| SERPINC1    | one_stearoyl_GPC                 | 0.20                   | 1.88                | 0.40                    | 5.67                 | 7.55                    |
| TTR         | glutamate                        | 0.31                   | 3.88                | 0.32                    | 3.67                 | 7.55                    |
| AHSG        | tiglyl_carnitine                 | -0.34                  | 4.67                | -0.28                   | 2.87                 | 7.55                    |
| ITIH2       | one_stearoyl_GPC                 | 0.31                   | 3.84                | 0.32                    | 3.71                 | 7.54                    |
| PGLYRP2     | X_10483                          | -0.31                  | 3.88                | -0.32                   | 3.66                 | 7.54                    |
| CLU         | X_12644                          | 0.17                   | 1.38                | 0.42                    | 6.17                 | 7.54                    |
| LCP1        | X_12786                          | 0.41                   | 6.61                | 0.14                    | 0.93                 | 7.54                    |
| AZGP1       | X_10266                          | 0.36                   | 5.08                | 0.25                    | 2.46                 | 7.54                    |
| SERPIND1    | one_arachidoyl_GPC               | 0.27                   | 3.16                | 0.35                    | 4.38                 | 7.54                    |
| VTN         | X_13553                          | -0.30                  | 3.82                | -0.32                   | 3.71                 | 7.53                    |
| DEFA1       | erythritol                       | 0.26                   | 2.84                | 0.36                    | 4.69                 | 7.53                    |
| TTR         | one_arachidoyl_GPC               | 0.27                   | 3.06                | 0.35                    | 4.47                 | 7.53                    |
| AFM         | N_acetylaniline                  | -0.37                  | 5.41                | -0.23                   | 2.12                 | 7.53                    |
| SAA1        | X_06268                          | -0.15                  | 1.16                | -0.42                   | 6.37                 | 7.53                    |
| SPINK1      | pyridoxate                       | 0.27                   | 3.12                | 0.35                    | 4.40                 | 7.53                    |
| APOH        | one_palmitoyl_GPC                | 0.25                   | 2.72                | 0.37                    | 4.80                 | 7.53                    |
| VWF         | tyrosine                         | 0.39                   | 5.97                | 0.19                    | 1.55                 | 7.53                    |
| ITIH1       | one_arachidoyl_GPC               | 0.27                   | 3.02                | 0.36                    | 4.51                 | 7.53                    |
| GPX3        | AHB                              | 0.23                   | 2.29                | 0.38                    | 5.23                 | 7.53                    |
| SERPINF1    | pyridoxate                       | 0.15                   | 1.18                | 0.42                    | 6.34                 | 7.52                    |
| FBLN1       | X_10266                          | 0.29                   | 3.54                | 0.33                    | 3.99                 | 7.52                    |
| SERPINF1    | X_11261                          | 0.30                   | 3.82                | 0.32                    | 3.70                 | 7.52                    |
| APOC3       | X_12092                          | 0.31                   | 3.97                | 0.31                    | 3.56                 | 7.52                    |
| AZGP1       | carnitine                        | -0.26                  | 2.82                | -0.36                   | 4.70                 | 7.52                    |
| SAA3P       | X_10483                          | 0.38                   | 5.76                | 0.21                    | 1.76                 | 7.52                    |

| gene symbol | metabolite                    | t0 Pearson Correlation | t0 NegLog10 p-value | t24 Pearson Correlation | t24 NegLog10 p-value | Sum of NegLog10 p-value |
|-------------|-------------------------------|------------------------|---------------------|-------------------------|----------------------|-------------------------|
| ITIH2       | X_04495                       | -0.31                  | 3.88                | -0.32                   | 3.64                 | 7.52                    |
| S100A9      | deoxycarnitine                | 0.38                   | 5.84                | 0.20                    | 1.68                 | 7.52                    |
| CD14        | one_oleoyl_GPC                | -0.24                  | 2.48                | -0.38                   | 5.04                 | 7.52                    |
| FGG         | mannose                       | 0.28                   | 3.32                | 0.34                    | 4.20                 | 7.52                    |
| ORM1        | piperine                      | -0.28                  | 3.21                | -0.35                   | 4.31                 | 7.52                    |
| SERPINC1    | octadecanedioate              | -0.29                  | 3.44                | -0.34                   | 4.08                 | 7.51                    |
| ORM2        | arabinose                     | 0.31                   | 4.04                | 0.31                    | 3.47                 | 7.51                    |
| RBP4        | sucrose                       | 0.23                   | 2.32                | 0.38                    | 5.19                 | 7.51                    |
| PON1        | prolylhydroxyproline          | -0.26                  | 2.93                | -0.36                   | 4.58                 | 7.51                    |
| VSIG4       | X_04507                       | 0.36                   | 5.08                | 0.25                    | 2.42                 | 7.51                    |
| SAA1        | X_12611                       | 0.32                   | 4.23                | 0.30                    | 3.27                 | 7.51                    |
| C1QA        | X_04499                       | 0.37                   | 5.63                | 0.22                    | 1.87                 | 7.51                    |
| HPR         | bilirubin                     | -0.27                  | 3.15                | -0.35                   | 4.35                 | 7.51                    |
| SERPINC1    | N_acetylglycine               | 0.25                   | 2.63                | 0.37                    | 4.87                 | 7.50                    |
| ORM1        | one_oleoyl_GPC                | -0.33                  | 4.41                | -0.29                   | 3.10                 | 7.50                    |
| RNASE1      | scyllo_inositol               | 0.30                   | 3.71                | 0.32                    | 3.79                 | 7.50                    |
| APOL1       | urea                          | -0.34                  | 4.65                | -0.28                   | 2.85                 | 7.50                    |
| IGFBP4      | gluconate                     | 0.38                   | 5.68                | 0.21                    | 1.82                 | 7.50                    |
| ORM2        | X_11838                       | 0.29                   | 3.51                | 0.33                    | 3.99                 | 7.50                    |
| SAA1        | glutamate                     | -0.36                  | 5.14                | -0.25                   | 2.36                 | 7.50                    |
| HRG         | X_10483                       | -0.33                  | 4.40                | -0.29                   | 3.10                 | 7.50                    |
| PRDX2       | xanthine                      | 0.31                   | 3.96                | 0.31                    | 3.54                 | 7.50                    |
| S100A8      | erythritol                    | 0.36                   | 5.18                | 0.25                    | 2.32                 | 7.50                    |
| DEFA1       | acetylcarnitine               | 0.26                   | 2.80                | 0.36                    | 4.70                 | 7.50                    |
| TF          | X_10395                       | 0.29                   | 3.54                | 0.33                    | 3.96                 | 7.50                    |
| LCN2        | X_11593                       | 0.27                   | 3.10                | 0.35                    | 4.40                 | 7.50                    |
| SERPINF1    | N2_N2_dimethylguanosine       | 0.28                   | 3.34                | 0.34                    | 4.16                 | 7.50                    |
| CST3        | X_11838                       | 0.21                   | 1.97                | 0.40                    | 5.52                 | 7.50                    |
| AFP         | methionine                    | 0.40                   | 6.35                | 0.16                    | 1.14                 | 7.50                    |
| SERPIND1    | glycocholate                  | -0.35                  | 5.07                | -0.25                   | 2.43                 | 7.50                    |
| ITIH4       | X_11795                       | -0.28                  | 3.30                | -0.34                   | 4.20                 | 7.50                    |
| ORM2        | X_12749                       | 0.23                   | 2.34                | 0.38                    | 5.16                 | 7.49                    |
| CST3        | X_11444                       | 0.24                   | 2.43                | 0.38                    | 5.06                 | 7.49                    |
| COL11A2     | one_eicosatrienoyl_GPC        | 0.32                   | 4.21                | 0.30                    | 3.28                 | 7.49                    |
| ITIH1       | X_08402                       | 0.20                   | 1.89                | 0.40                    | 5.59                 | 7.49                    |
| B2M         | three_methyl_2_oxovalerate    | -0.29                  | 3.47                | -0.33                   | 4.01                 | 7.49                    |
| PLG         | N2_N2_dimethylguanosine       | -0.11                  | 0.70                | -0.44                   | 6.79                 | 7.48                    |
| DEFA1       | SDMA                          | 0.20                   | 1.83                | 0.40                    | 5.65                 | 7.48                    |
| C1QB        | N_acetylaniline               | 0.41                   | 6.85                | 0.11                    | 0.63                 | 7.48                    |
| CAT         | phenylalanine                 | 0.13                   | 0.99                | 0.43                    | 6.49                 | 7.48                    |
| C1QA        | X_10395                       | -0.41                  | 6.80                | -0.11                   | 0.67                 | 7.47                    |
| LCN2        | X_13619                       | -0.32                  | 4.09                | -0.30                   | 3.38                 | 7.47                    |
| AZGP1       | catechol_sulfate              | 0.36                   | 5.30                | 0.24                    | 2.17                 | 7.47                    |
| VWF         | two_palmitoyl_GPC             | -0.29                  | 3.56                | -0.33                   | 3.91                 | 7.47                    |
| APOA4       | X_11452                       | 0.35                   | 4.84                | 0.26                    | 2.63                 | 7.47                    |
| TTR         | beta_hydroxyisovalerate       | -0.35                  | 4.96                | -0.26                   | 2.51                 | 7.47                    |
| APOC3       | N6_carbamoylthreonyladenosine | 0.31                   | 3.83                | 0.32                    | 3.63                 | 7.47                    |
| RNASE1      | X_11843                       | 0.28                   | 3.26                | 0.34                    | 4.20                 | 7.47                    |
| FGG         | X_11445                       | 0.34                   | 4.71                | 0.27                    | 2.75                 | 7.46                    |
| APOL1       | tiglyl_carnitine              | -0.39                  | 6.22                | -0.17                   | 1.24                 | 7.46                    |
| FCGBP       | glutaroylcarnitine            | 0.26                   | 2.83                | 0.36                    | 4.63                 | 7.46                    |
| ITIH1       | X_12644                       | 0.22                   | 2.20                | 0.39                    | 5.26                 | 7.46                    |
| VWF         | X_12038                       | -0.32                  | 4.13                | -0.30                   | 3.32                 | 7.45                    |
| ADIPOQ      | malate                        | 0.25                   | 2.76                | 0.36                    | 4.70                 | 7.45                    |
| ORM2        | X_12742                       | 0.25                   | 2.62                | 0.37                    | 4.83                 | 7.45                    |
| APOL1       | deoxycarnitine                | -0.39                  | 6.10                | -0.18                   | 1.35                 | 7.45                    |

| gene symbol | metabolite                       | t0 Pearson Correlation | t0 NegLog10 p-value | t24 Pearson Correlation | t24 NegLog10 p-value | Sum of NegLog10 p-value |
|-------------|----------------------------------|------------------------|---------------------|-------------------------|----------------------|-------------------------|
| PLG         | X_12688                          | -0.08                  | 0.46                | -0.44                   | 6.99                 | 7.45                    |
| PLG         | X_12611                          | -0.16                  | 1.34                | -0.42                   | 6.10                 | 7.45                    |
| FBLN1       | X_04498                          | 0.28                   | 3.32                | 0.34                    | 4.13                 | 7.45                    |
| LYZ         | indolelactate                    | 0.40                   | 6.44                | 0.15                    | 1.01                 | 7.45                    |
| CFB         | X_11538                          | -0.27                  | 3.02                | -0.35                   | 4.43                 | 7.45                    |
| FCGBP       | X_11687                          | 0.25                   | 2.76                | 0.36                    | 4.68                 | 7.45                    |
| IGFBP4      | N_acetylneuraminate              | 0.32                   | 4.09                | 0.30                    | 3.35                 | 7.44                    |
| SERPINF1    | X_12860                          | 0.32                   | 4.07                | 0.30                    | 3.37                 | 7.44                    |
| FGG         | androsterone_sulfate             | 0.34                   | 4.59                | 0.28                    | 2.85                 | 7.44                    |
| SERPINA3    | X_11273                          | 0.34                   | 4.60                | 0.28                    | 2.84                 | 7.44                    |
| HPR         | proline                          | -0.25                  | 2.72                | -0.36                   | 4.72                 | 7.44                    |
| F12         | X_14626                          | -0.31                  | 3.93                | -0.31                   | 3.51                 | 7.44                    |
| HP          | malate                           | -0.21                  | 1.96                | -0.39                   | 5.47                 | 7.43                    |
| CFD         | mannitol                         | 0.33                   | 4.38                | 0.29                    | 3.06                 | 7.43                    |
| APOA2       | butyrylcarnitine                 | -0.32                  | 4.17                | -0.30                   | 3.27                 | 7.43                    |
| ITIH2       | N_acetylthreonine                | -0.32                  | 4.24                | -0.29                   | 3.19                 | 7.43                    |
| HPR         | glutamine                        | -0.29                  | 3.41                | -0.33                   | 4.02                 | 7.43                    |
| ITIH3       | piperine                         | -0.31                  | 3.89                | -0.31                   | 3.54                 | 7.43                    |
| FABP1       | glycocholate                     | 0.22                   | 2.10                | 0.39                    | 5.32                 | 7.43                    |
| PGLYRP2     | X_12802                          | -0.29                  | 3.47                | -0.33                   | 3.96                 | 7.42                    |
| VSIG4       | X_12095                          | 0.34                   | 4.68                | 0.27                    | 2.75                 | 7.42                    |
| AFM         | X_12104                          | -0.20                  | 1.91                | -0.39                   | 5.52                 | 7.42                    |
| LUM         | X_04498                          | 0.29                   | 3.60                | 0.33                    | 3.82                 | 7.42                    |
| B2M         | one_eicosatrienoyl_GPC           | -0.23                  | 2.36                | -0.38                   | 5.07                 | 7.42                    |
| C4BPA       | caffeine                         | -0.36                  | 5.24                | -0.24                   | 2.18                 | 7.42                    |
| LBP         | X_05522                          | 0.33                   | 4.41                | 0.28                    | 3.01                 | 7.42                    |
| RBP4        | alpha_ketoglutarate              | 0.33                   | 4.43                | 0.28                    | 2.99                 | 7.42                    |
| SAA3P       | X_11470                          | 0.29                   | 3.58                | 0.33                    | 3.83                 | 7.42                    |
| FBLN1       | X_11334                          | 0.31                   | 3.97                | 0.31                    | 3.44                 | 7.41                    |
| SAA3P       | X_12802                          | 0.34                   | 4.56                | 0.28                    | 2.85                 | 7.41                    |
| IGFBP4      | threonate                        | 0.39                   | 6.00                | 0.18                    | 1.41                 | 7.41                    |
| ADIPOQ      | pantothenate                     | 0.37                   | 5.43                | 0.22                    | 1.98                 | 7.41                    |
| APOC3       | X_11444                          | 0.27                   | 3.17                | 0.34                    | 4.24                 | 7.41                    |
| C3          | HPLA                             | -0.27                  | 3.10                | -0.35                   | 4.31                 | 7.41                    |
| ORM1        | threitol                         | 0.32                   | 4.15                | 0.30                    | 3.26                 | 7.41                    |
| APOD        | one_palmitoyl_GPC                | 0.35                   | 5.01                | 0.25                    | 2.40                 | 7.41                    |
| APOH        | glycochenodeoxycholate           | -0.32                  | 4.08                | -0.30                   | 3.33                 | 7.41                    |
| F12         | X_11273                          | -0.35                  | 4.92                | -0.26                   | 2.49                 | 7.41                    |
| C1QA        | X_11521                          | 0.26                   | 2.90                | 0.36                    | 4.51                 | 7.41                    |
| AZGP1       | threonine                        | -0.35                  | 4.86                | -0.26                   | 2.55                 | 7.41                    |
| CD5L        | seven_HOCA                       | 0.34                   | 4.61                | 0.27                    | 2.80                 | 7.41                    |
| LYZ         | X_12101                          | 0.42                   | 7.16                | 0.05                    | 0.24                 | 7.40                    |
| AHSG        | X_11880                          | 0.27                   | 3.06                | 0.35                    | 4.34                 | 7.40                    |
| LRG1        | three_cystein_S_yl_acetaminophen | 0.31                   | 3.91                | 0.31                    | 3.48                 | 7.40                    |
| RBP4        | X_12688                          | 0.27                   | 3.11                | 0.35                    | 4.28                 | 7.40                    |
| FCGBP       | one_oleoyl_GPC                   | -0.15                  | 1.12                | -0.42                   | 6.28                 | 7.40                    |
| FCGBP       | cortisol                         | 0.20                   | 1.90                | 0.39                    | 5.49                 | 7.40                    |
| PLG         | hexadecanedioate                 | -0.12                  | 0.87                | -0.43                   | 6.52                 | 7.40                    |
| ORM1        | three_cystein_S_yl_acetaminophen | 0.36                   | 5.25                | 0.23                    | 2.14                 | 7.39                    |
| ITIH1       | one_arachidoyl_GPE               | 0.34                   | 4.56                | 0.28                    | 2.84                 | 7.39                    |
| ORM2        | X_12510                          | -0.29                  | 3.39                | -0.33                   | 4.00                 | 7.39                    |
| CFHR2       | X_03056                          | 0.33                   | 4.47                | 0.28                    | 2.92                 | 7.39                    |
| APOE        | X_14658                          | 0.31                   | 4.04                | 0.30                    | 3.35                 | 7.39                    |
| ITIH2       | X_12644                          | 0.30                   | 3.70                | 0.32                    | 3.69                 | 7.39                    |
| ITIH2       | deoxycarnitine                   | -0.35                  | 4.95                | -0.25                   | 2.44                 | 7.39                    |
| VASN        | mannitol                         | 0.31                   | 3.89                | 0.31                    | 3.49                 | 7.39                    |

| gene symbol | metabolite                 | t0 Pearson Correlation | t0 NegLog10 p-value | t24 Pearson Correlation | t24 NegLog10 p-value | Sum of NegLog10 p-value |
|-------------|----------------------------|------------------------|---------------------|-------------------------|----------------------|-------------------------|
| CFD         | urea                       | 0.21                   | 2.03                | 0.39                    | 5.35                 | 7.39                    |
| VTN         | phenylacetylglutamine      | -0.29                  | 3.39                | -0.33                   | 4.00                 | 7.39                    |
| KLKB1       | N_acetylaniline            | -0.32                  | 4.15                | -0.30                   | 3.23                 | 7.39                    |
| C8G         | allantoin                  | -0.31                  | 3.89                | -0.31                   | 3.49                 | 7.38                    |
| VSIG4       | X_12855                    | 0.31                   | 3.85                | 0.31                    | 3.53                 | 7.38                    |
| CD14        | X_12099                    | 0.32                   | 4.11                | 0.30                    | 3.27                 | 7.38                    |
| RBP4        | X_11444                    | 0.21                   | 1.94                | 0.39                    | 5.44                 | 7.38                    |
| C1QA        | N_acetylaniline            | 0.36                   | 5.10                | 0.24                    | 2.27                 | 7.38                    |
| AHSG        | piperine                   | 0.28                   | 3.28                | 0.34                    | 4.10                 | 7.38                    |
| F12         | one_linoleoyl_GPC          | 0.35                   | 4.98                | 0.25                    | 2.40                 | 7.38                    |
| ORM1        | octanoylcarnitine          | 0.24                   | 2.54                | 0.37                    | 4.84                 | 7.38                    |
| CST3        | four_acetaminophen_sulfate | 0.21                   | 2.06                | 0.39                    | 5.32                 | 7.38                    |
| COL3A1      | taurochenodeoxycholate     | 0.31                   | 3.85                | 0.31                    | 3.52                 | 7.37                    |
| SERPINF1    | tryptophan                 | -0.34                  | 4.79                | -0.26                   | 2.58                 | 7.37                    |
| VSIG4       | two_methylbutyrylcarnitine | 0.34                   | 4.61                | 0.27                    | 2.76                 | 7.37                    |
| ACTA2       | tyrosine                   | 0.21                   | 1.97                | 0.39                    | 5.41                 | 7.37                    |
| VASN        | gulono_1_4_lactone         | 0.30                   | 3.68                | 0.32                    | 3.69                 | 7.37                    |
| CD5L        | glycochenodeoxycholate     | 0.33                   | 4.39                | 0.28                    | 2.98                 | 7.37                    |
| LUM         | X_14658                    | 0.23                   | 2.32                | 0.38                    | 5.05                 | 7.37                    |
| LCN2        | creatinine                 | 0.30                   | 3.77                | 0.31                    | 3.60                 | 7.37                    |
| VTN         | X_04629                    | -0.25                  | 2.69                | -0.36                   | 4.68                 | 7.36                    |
| RBMX        | pipecolate                 | 0.37                   | 5.37                | 0.22                    | 1.99                 | 7.36                    |
| APOC3       | X_05426                    | 0.28                   | 3.23                | 0.34                    | 4.13                 | 7.36                    |
| DEFA1       | X_12749                    | 0.26                   | 2.93                | 0.35                    | 4.43                 | 7.36                    |
| DEFA1       | one_methyladenosine        | 0.32                   | 4.20                | 0.29                    | 3.16                 | 7.36                    |
| SERPIND1    | X_10483                    | -0.33                  | 4.53                | -0.27                   | 2.83                 | 7.36                    |
| ORM1        | caffeine                   | -0.24                  | 2.48                | -0.37                   | 4.88                 | 7.36                    |
| VTN         | N_acetylthreonine          | -0.18                  | 1.59                | -0.40                   | 5.77                 | 7.36                    |
| REG1A       | kynurenine                 | 0.24                   | 2.56                | 0.37                    | 4.80                 | 7.35                    |
| SERPINA6    | androsterone_sulfate       | 0.35                   | 4.92                | 0.25                    | 2.43                 | 7.35                    |
| APOA4       | pyridoxate                 | 0.32                   | 4.28                | 0.29                    | 3.07                 | 7.35                    |
| AZGP1       | myo_inositol               | 0.35                   | 5.01                | 0.25                    | 2.34                 | 7.35                    |
| S100A8      | X_10395                    | -0.35                  | 4.98                | -0.25                   | 2.37                 | 7.35                    |
| LRG1        | X_11440                    | 0.30                   | 3.75                | 0.31                    | 3.59                 | 7.34                    |
| LYZ         | phosphate                  | 0.37                   | 5.47                | 0.22                    | 1.88                 | 7.34                    |
| PON1        | X_11421                    | -0.32                  | 4.08                | -0.30                   | 3.26                 | 7.34                    |
| CLU         | one_linoleoyl_GPC          | 0.27                   | 3.02                | 0.35                    | 4.32                 | 7.34                    |
| LUM         | catechol_sulfate           | 0.33                   | 4.39                | 0.28                    | 2.95                 | 7.34                    |
| REG1A       | X_11282                    | 0.25                   | 2.76                | 0.36                    | 4.58                 | 7.34                    |
| CFD         | X_12844                    | 0.26                   | 2.96                | 0.35                    | 4.38                 | 7.34                    |
| TF          | histidine                  | 0.22                   | 2.15                | 0.38                    | 5.18                 | 7.33                    |
| COL1A1      | mannitol                   | 0.36                   | 5.14                | 0.24                    | 2.19                 | 7.33                    |
| F12         | one_stearoyl_GPC           | 0.32                   | 4.22                | 0.29                    | 3.12                 | 7.33                    |
| CD14        | erythritol                 | 0.26                   | 2.87                | 0.35                    | 4.47                 | 7.33                    |
| CST3        | three_methylhistidine      | 0.35                   | 4.91                | 0.25                    | 2.42                 | 7.33                    |
| TTR         | X_11452                    | 0.25                   | 2.73                | 0.36                    | 4.60                 | 7.33                    |
| CD14        | one_methyladenosine        | 0.29                   | 3.48                | 0.33                    | 3.85                 | 7.33                    |
| VSIG4       | acetylcarnitine            | 0.30                   | 3.72                | 0.32                    | 3.61                 | 7.33                    |
| LUM         | erythronate                | 0.28                   | 3.24                | 0.34                    | 4.09                 | 7.33                    |
| S100A8      | X_11450                    | 0.29                   | 3.48                | 0.33                    | 3.84                 | 7.33                    |
| COL3A1      | methionine                 | 0.36                   | 5.09                | 0.24                    | 2.24                 | 7.32                    |
| GPX3        | X_04629                    | -0.36                  | 5.20                | -0.23                   | 2.12                 | 7.32                    |
| PLG         | erythronate                | -0.11                  | 0.75                | -0.43                   | 6.58                 | 7.32                    |
| SEPP1       | taurocholate               | -0.33                  | 4.54                | -0.27                   | 2.78                 | 7.32                    |
| LCP1        | one_linoleoyl_GPC          | -0.23                  | 2.26                | -0.38                   | 5.06                 | 7.32                    |
| COL11A2     | X_05907                    | 0.38                   | 5.69                | 0.20                    | 1.63                 | 7.32                    |

| gene symbol | metabolite                       | t0 Pearson Correlation | t0 NegLog10 p-value | t24 Pearson Correlation | t24 NegLog10 p-value | Sum of NegLog10 p-value |
|-------------|----------------------------------|------------------------|---------------------|-------------------------|----------------------|-------------------------|
| LCN2        | acetylcarnitine                  | 0.31                   | 3.86                | 0.31                    | 3.46                 | 7.32                    |
| F12         | citrate                          | 0.28                   | 3.24                | 0.34                    | 4.08                 | 7.32                    |
| KNG1        | one_arachidoyl_GPE               | 0.29                   | 3.40                | 0.33                    | 3.91                 | 7.31                    |
| AMBP        | X_11510                          | 0.31                   | 3.92                | 0.30                    | 3.40                 | 7.31                    |
| MB          | X_12860                          | 0.33                   | 4.34                | 0.28                    | 2.97                 | 7.31                    |
| VSIG4       | N6_carbamoylthreonyladenosine    | 0.34                   | 4.77                | 0.26                    | 2.54                 | 7.31                    |
| VTN         | creatinine                       | -0.28                  | 3.31                | -0.33                   | 4.00                 | 7.31                    |
| REG1A       | X_13619                          | -0.28                  | 3.28                | -0.33                   | 4.03                 | 7.31                    |
| ORM2        | one_stearoyl_GPC                 | -0.34                  | 4.60                | -0.27                   | 2.70                 | 7.31                    |
| PGLYRP2     | two_palmitoyl_GPC                | 0.31                   | 3.87                | 0.31                    | 3.44                 | 7.31                    |
| C1QC        | one_arachidoyl_GPC               | -0.22                  | 2.22                | -0.38                   | 5.08                 | 7.31                    |
| CFHR2       | phenol_sulfate                   | 0.37                   | 5.46                | 0.21                    | 1.84                 | 7.30                    |
| FABP1       | seven_HOCA                       | 0.11                   | 0.77                | 0.43                    | 6.53                 | 7.30                    |
| KLKB1       | SDMA                             | -0.34                  | 4.57                | -0.27                   | 2.74                 | 7.30                    |
| ORM2        | threitol                         | 0.31                   | 3.91                | 0.30                    | 3.39                 | 7.30                    |
| FCGBP       | erythronate                      | 0.27                   | 2.98                | 0.35                    | 4.32                 | 7.30                    |
| APOA4       | three_indoxyl_sulfate            | 0.35                   | 4.94                | 0.25                    | 2.36                 | 7.30                    |
| APOA4       | X_04504                          | 0.34                   | 4.59                | 0.27                    | 2.71                 | 7.30                    |
| VSIG4       | X_12100                          | 0.37                   | 5.62                | 0.20                    | 1.67                 | 7.30                    |
| ORM1        | X_12749                          | 0.22                   | 2.09                | 0.38                    | 5.21                 | 7.30                    |
| PGLYRP2     | X_12458                          | -0.33                  | 4.35                | -0.28                   | 2.94                 | 7.29                    |
| F12         | one_oleoyl_GPC                   | 0.35                   | 4.95                | 0.25                    | 2.34                 | 7.29                    |
| KLKB1       | X_04499                          | -0.38                  | 5.75                | -0.19                   | 1.54                 | 7.29                    |
| SPINK1      | erythritol                       | 0.33                   | 4.45                | 0.28                    | 2.85                 | 7.29                    |
| PLG         | X_11491                          | -0.15                  | 1.19                | -0.42                   | 6.10                 | 7.29                    |
| SAA3P       | glycine                          | -0.14                  | 1.10                | -0.42                   | 6.19                 | 7.29                    |
| ORM1        | gulono_1_4_lactone               | 0.35                   | 4.95                | 0.25                    | 2.34                 | 7.29                    |
| VWF         | glycocholate                     | 0.29                   | 3.56                | 0.32                    | 3.72                 | 7.28                    |
| PON1        | one_methylimidazoleacetate       | -0.26                  | 2.89                | -0.35                   | 4.40                 | 7.28                    |
| ORM2        | X_11880                          | -0.35                  | 4.91                | -0.25                   | 2.37                 | 7.28                    |
| TTR         | hexanoylcarnitine                | -0.36                  | 5.16                | -0.23                   | 2.12                 | 7.28                    |
| PTGDS       | X_11450                          | 0.26                   | 2.94                | 0.35                    | 4.34                 | 7.28                    |
| KNG1        | one_oleoyl_GPC                   | 0.26                   | 2.81                | 0.35                    | 4.47                 | 7.28                    |
| HPR         | alpha_ketoglutarate              | -0.28                  | 3.26                | -0.33                   | 4.02                 | 7.28                    |
| F2          | gluconate                        | -0.38                  | 5.71                | -0.19                   | 1.57                 | 7.27                    |
| SAA1        | X_11838                          | 0.19                   | 1.70                | 0.40                    | 5.57                 | 7.27                    |
| AFM         | X_01327                          | 0.33                   | 4.52                | 0.27                    | 2.75                 | 7.27                    |
| LRG1        | seven_HOCA                       | -0.31                  | 4.02                | -0.30                   | 3.25                 | 7.27                    |
| SERPING1    | X_14588                          | 0.30                   | 3.81                | 0.31                    | 3.46                 | 7.27                    |
| C7          | X_04357                          | 0.35                   | 5.03                | 0.24                    | 2.24                 | 7.27                    |
| B2M         | urate                            | 0.37                   | 5.56                | 0.20                    | 1.71                 | 7.27                    |
| RNASE1      | two_hydroxyacetaminophen_sulfate | 0.24                   | 2.44                | 0.37                    | 4.83                 | 7.27                    |
| GPX3        | pipecolate                       | 0.37                   | 5.36                | 0.22                    | 1.91                 | 7.27                    |
| A1BG        | X_12101                          | -0.31                  | 4.02                | -0.30                   | 3.24                 | 7.26                    |
| CD14        | carnitine                        | -0.25                  | 2.70                | -0.36                   | 4.57                 | 7.26                    |
| ADIPOQ      | X_11334                          | 0.37                   | 5.40                | 0.22                    | 1.87                 | 7.26                    |
| C4BPA       | glycochenodeoxycholate           | -0.34                  | 4.74                | -0.26                   | 2.52                 | 7.26                    |
| SERPINA6    | tiglyl_carnitine                 | 0.34                   | 4.60                | 0.27                    | 2.66                 | 7.26                    |
| APOC3       | X_04629                          | 0.33                   | 4.41                | 0.28                    | 2.85                 | 7.26                    |
| PON1        | decanoylcarnitine                | -0.31                  | 3.88                | -0.30                   | 3.38                 | 7.26                    |
| F12         | one_palmitoyl_GPC                | 0.36                   | 5.08                | 0.24                    | 2.18                 | 7.26                    |
| PLG         | erythritol                       | -0.15                  | 1.17                | -0.42                   | 6.09                 | 7.26                    |
| PON1        | X_03056                          | -0.28                  | 3.29                | -0.33                   | 3.97                 | 7.26                    |
| AFM         | three_hydroxy_2_ethylpropionate  | -0.40                  | 6.50                | -0.12                   | 0.75                 | 7.26                    |
| PLG         | X_12101                          | -0.05                  | 0.29                | -0.44                   | 6.96                 | 7.26                    |
| LUM         | betaine                          | 0.26                   | 2.83                | 0.35                    | 4.42                 | 7.25                    |



| gene symbol | metabolite                       | t0 Pearson Correlation | t0 NegLog10 p-value | t24 Pearson Correlation | t24 NegLog10 p-value | Sum of NegLog10 p-value |
|-------------|----------------------------------|------------------------|---------------------|-------------------------|----------------------|-------------------------|
| VTN         | N_acetylanine                    | -0.27                  | 3.11                | -0.34                   | 4.14                 | 7.25                    |
| SAA1        | X_13429                          | 0.25                   | 2.73                | 0.36                    | 4.52                 | 7.25                    |
| AHSG        | hydroxyisovalerylcarnitine       | -0.30                  | 3.77                | -0.31                   | 3.48                 | 7.25                    |
| LCN2        | X_03056                          | 0.27                   | 2.98                | 0.35                    | 4.27                 | 7.25                    |
| LUM         | mannitol                         | 0.29                   | 3.42                | 0.33                    | 3.83                 | 7.25                    |
| FCGBP       | X_12860                          | 0.26                   | 2.81                | 0.35                    | 4.44                 | 7.25                    |
| LYZ         | X_05522                          | 0.40                   | 6.48                | 0.12                    | 0.77                 | 7.25                    |
| FGA         | X_11786                          | -0.32                  | 4.30                | -0.28                   | 2.95                 | 7.25                    |
| SERPINA1    | creatine                         | 0.31                   | 4.01                | 0.30                    | 3.23                 | 7.25                    |
| S100A8      | X_11687                          | 0.33                   | 4.45                | 0.27                    | 2.80                 | 7.25                    |
| HPX         | allantoin                        | -0.30                  | 3.81                | -0.31                   | 3.44                 | 7.24                    |
| FCGBP       | one_arachidoyl_GPE               | -0.27                  | 3.07                | -0.34                   | 4.17                 | 7.24                    |
| VSIG4       | allantoin                        | 0.31                   | 3.83                | 0.31                    | 3.41                 | 7.24                    |
| SPINK1      | hippurate                        | 0.34                   | 4.59                | 0.26                    | 2.65                 | 7.24                    |
| FBLN1       | X_13553                          | 0.28                   | 3.38                | 0.33                    | 3.86                 | 7.24                    |
| CFHR2       | X_10266                          | 0.29                   | 3.57                | 0.32                    | 3.66                 | 7.24                    |
| SERPINC1    | one_oleoyl_GPC                   | 0.18                   | 1.54                | 0.40                    | 5.70                 | 7.24                    |
| APOL1       | X_12855                          | -0.36                  | 5.27                | -0.22                   | 1.97                 | 7.24                    |
| HRG         | N_acetylthreonine                | -0.31                  | 3.90                | -0.30                   | 3.33                 | 7.24                    |
| AFM         | two_methylbutyrylcarnitine       | -0.38                  | 5.70                | -0.19                   | 1.54                 | 7.23                    |
| VTN         | four_acetamidobutanoate          | -0.23                  | 2.25                | -0.37                   | 4.98                 | 7.23                    |
| C1QB        | X_12688                          | 0.36                   | 5.09                | 0.23                    | 2.14                 | 7.23                    |
| SHBG        | mannose                          | -0.36                  | 5.30                | -0.22                   | 1.93                 | 7.23                    |
| KLKB1       | X_12458                          | -0.38                  | 5.85                | -0.18                   | 1.38                 | 7.23                    |
| C1QA        | allantoin                        | 0.35                   | 4.92                | 0.24                    | 2.31                 | 7.23                    |
| LUM         | X_12742                          | 0.32                   | 4.09                | 0.29                    | 3.14                 | 7.22                    |
| ITIH3       | X_10395                          | -0.40                  | 6.40                | -0.13                   | 0.82                 | 7.22                    |
| ITIH2       | X_13553                          | -0.27                  | 3.13                | -0.34                   | 4.09                 | 7.22                    |
| LCN2        | beta_hydroxyisovalerate          | 0.34                   | 4.68                | 0.26                    | 2.54                 | 7.22                    |
| SPINK1      | three_cystein_S_yl_acetaminophen | 0.22                   | 2.09                | 0.38                    | 5.13                 | 7.21                    |
| ICAM2       | X_12850                          | 0.25                   | 2.65                | 0.36                    | 4.56                 | 7.21                    |
| LBP         | threonine                        | -0.27                  | 3.13                | -0.34                   | 4.08                 | 7.21                    |
| SERPINA3    | one_oleoyl_GPE                   | -0.23                  | 2.28                | -0.37                   | 4.93                 | 7.21                    |
| S100A9      | X_03056                          | 0.33                   | 4.40                | 0.27                    | 2.81                 | 7.21                    |
| A1BG        | X_11450                          | -0.30                  | 3.65                | -0.31                   | 3.56                 | 7.21                    |
| SERPINA6    | three_cystein_S_yl_acetaminophen | 0.31                   | 4.03                | 0.29                    | 3.18                 | 7.21                    |
| SERPINF1    | X_03951                          | 0.26                   | 2.93                | 0.35                    | 4.28                 | 7.20                    |
| SPINK1      | five_oxoproline                  | 0.41                   | 6.76                | 0.08                    | 0.44                 | 7.20                    |
| C1QC        | one_arachidoyl_GPE               | -0.20                  | 1.84                | -0.39                   | 5.36                 | 7.20                    |
| VSIG4       | X_12860                          | 0.29                   | 3.59                | 0.31                    | 3.61                 | 7.19                    |
| LUM         | X_12688                          | 0.28                   | 3.25                | 0.33                    | 3.94                 | 7.19                    |
| VTN         | X_11593                          | -0.26                  | 2.95                | -0.34                   | 4.24                 | 7.19                    |
| CFD         | p_cresol_sulfate                 | 0.28                   | 3.38                | 0.32                    | 3.81                 | 7.19                    |
| APOA4       | arabitol                         | 0.33                   | 4.41                | 0.27                    | 2.78                 | 7.19                    |
| LUM         | X_04507                          | 0.32                   | 4.14                | 0.29                    | 3.04                 | 7.19                    |
| RNASE1      | X_11443                          | 0.23                   | 2.36                | 0.37                    | 4.83                 | 7.19                    |
| VSIG4       | alpha_hydroxyisovalerate         | 0.14                   | 1.02                | 0.42                    | 6.17                 | 7.19                    |
| LCN2        | one_oleoyl_GPE                   | -0.16                  | 1.29                | -0.41                   | 5.89                 | 7.18                    |
| FCGBP       | N2_N2_dimethylguanosine          | 0.23                   | 2.42                | 0.37                    | 4.77                 | 7.18                    |
| F12         | X_11795                          | 0.26                   | 2.80                | 0.35                    | 4.38                 | 7.18                    |
| IGFBP4      | urea                             | 0.37                   | 5.46                | 0.20                    | 1.72                 | 7.18                    |
| VSIG4       | octanoylcarnitine                | 0.30                   | 3.73                | 0.31                    | 3.44                 | 7.17                    |
| SAA3P       | X_11838                          | 0.20                   | 1.88                | 0.39                    | 5.30                 | 7.17                    |
| C4BPA       | biliverdin                       | -0.29                  | 3.54                | -0.32                   | 3.63                 | 7.17                    |
| LYZ         | carnitine                        | -0.39                  | 5.96                | -0.16                   | 1.21                 | 7.17                    |
| FCGBP       | acetylcarnitine                  | 0.33                   | 4.45                | 0.27                    | 2.71                 | 7.17                    |

| gene symbol | metabolite                    | t0 Pearson Correlation | t0 NegLog10 p-value | t24 Pearson Correlation | t24 NegLog10 p-value | Sum of NegLog10 p-value |
|-------------|-------------------------------|------------------------|---------------------|-------------------------|----------------------|-------------------------|
| TTR         | X_02249                       | 0.34                   | 4.76                | 0.25                    | 2.41                 | 7.17                    |
| SERPINF1    | erythritol                    | 0.31                   | 3.83                | 0.30                    | 3.33                 | 7.17                    |
| CD14        | four_acetaminophen_sulfate    | 0.25                   | 2.77                | 0.35                    | 4.40                 | 7.16                    |
| MB          | N_acetylneuraminate           | 0.25                   | 2.71                | 0.35                    | 4.46                 | 7.16                    |
| APOH        | creatinine                    | 0.33                   | 4.43                | 0.27                    | 2.73                 | 7.16                    |
| CFHR2       | glutamylvaline                | 0.31                   | 3.87                | 0.30                    | 3.29                 | 7.16                    |
| CD14        | xylonate                      | 0.25                   | 2.70                | 0.35                    | 4.46                 | 7.16                    |
| APOH        | X_11470                       | 0.34                   | 4.60                | 0.26                    | 2.56                 | 7.16                    |
| KNG1        | X_11786                       | 0.20                   | 1.91                | 0.38                    | 5.24                 | 7.15                    |
| TF          | X_11452                       | 0.11                   | 0.79                | 0.42                    | 6.37                 | 7.15                    |
| CD14        | X_12742                       | 0.22                   | 2.24                | 0.37                    | 4.91                 | 7.15                    |
| VTN         | three_indoxyl_sulfate         | -0.25                  | 2.78                | -0.35                   | 4.37                 | 7.15                    |
| VASN        | X_05426                       | 0.31                   | 3.86                | 0.30                    | 3.28                 | 7.15                    |
| TIMP1       | X_14658                       | 0.35                   | 4.82                | 0.25                    | 2.32                 | 7.14                    |
| IGFBP4      | p_cresol_sulfate              | 0.34                   | 4.66                | 0.26                    | 2.49                 | 7.14                    |
| CFD         | X_11437                       | 0.33                   | 4.36                | 0.27                    | 2.79                 | 7.14                    |
| KNG1        | one_palmitoleoyl_GPC          | 0.31                   | 4.02                | 0.29                    | 3.12                 | 7.14                    |
| AFM         | X_11273                       | -0.32                  | 4.17                | -0.28                   | 2.97                 | 7.14                    |
| FN1         | malate                        | 0.19                   | 1.66                | 0.39                    | 5.48                 | 7.14                    |
| SAA4        | one_palmitoylglycerol         | 0.35                   | 4.88                | 0.24                    | 2.26                 | 7.14                    |
| SERPINA3    | X_14626                       | 0.33                   | 4.46                | 0.27                    | 2.68                 | 7.14                    |
| CST3        | X_10439                       | 0.38                   | 5.67                | 0.18                    | 1.46                 | 7.13                    |
| FABP1       | HPLA                          | 0.23                   | 2.31                | 0.37                    | 4.82                 | 7.13                    |
| HRG         | beta_hydroxyisovalerate       | -0.34                  | 4.66                | -0.25                   | 2.47                 | 7.13                    |
| CD14        | N_acetylthreonine             | 0.33                   | 4.47                | 0.27                    | 2.66                 | 7.13                    |
| ORM2        | one_palmitoleoyl_GPC          | -0.34                  | 4.75                | -0.25                   | 2.38                 | 7.13                    |
| VSIG4       | X_12101                       | 0.33                   | 4.38                | 0.27                    | 2.75                 | 7.13                    |
| SERPINA6    | X_11445                       | 0.30                   | 3.79                | 0.30                    | 3.34                 | 7.13                    |
| APOL1       | X_12860                       | -0.36                  | 5.08                | -0.23                   | 2.04                 | 7.13                    |
| CD14        | SDMA                          | 0.19                   | 1.65                | 0.39                    | 5.48                 | 7.12                    |
| IGFBP4      | X_03056                       | 0.38                   | 5.92                | 0.16                    | 1.20                 | 7.12                    |
| LUM         | N_acetylaniline               | 0.24                   | 2.50                | 0.36                    | 4.62                 | 7.12                    |
| APOH        | pyridoxate                    | 0.33                   | 4.53                | 0.26                    | 2.59                 | 7.12                    |
| SERPINA1    | X_09789                       | -0.30                  | 3.65                | -0.31                   | 3.47                 | 7.12                    |
| FN1         | citrate                       | 0.25                   | 2.76                | 0.35                    | 4.37                 | 7.12                    |
| SAA3P       | DHEA_S                        | 0.34                   | 4.78                | 0.25                    | 2.33                 | 7.12                    |
| S100A9      | pelargonate                   | -0.35                  | 4.85                | -0.24                   | 2.26                 | 7.12                    |
| DEFA1       | X_11429                       | 0.20                   | 1.90                | 0.38                    | 5.22                 | 7.11                    |
| CST3        | phenylalanine                 | 0.39                   | 6.23                | 0.13                    | 0.89                 | 7.11                    |
| A1BG        | X_11244                       | -0.31                  | 4.04                | -0.29                   | 3.07                 | 7.11                    |
| F12         | two_palmitoyl_GPC             | 0.31                   | 4.01                | 0.29                    | 3.10                 | 7.11                    |
| LCN2        | octanoylcarnitine             | 0.30                   | 3.77                | 0.30                    | 3.35                 | 7.11                    |
| FN1         | bilirubin                     | 0.23                   | 2.27                | 0.37                    | 4.84                 | 7.11                    |
| ORM2        | SDMA                          | 0.28                   | 3.37                | 0.32                    | 3.74                 | 7.11                    |
| AHSG        | butyrylcarnitine              | -0.35                  | 4.90                | -0.24                   | 2.21                 | 7.11                    |
| RBP4        | X_08889                       | 0.27                   | 3.10                | 0.33                    | 4.01                 | 7.11                    |
| TF          | X_10483                       | -0.33                  | 4.36                | -0.27                   | 2.74                 | 7.11                    |
| C6          | four_acetamidobutanoate       | -0.29                  | 3.52                | -0.31                   | 3.59                 | 7.11                    |
| SERPINF1    | X_05522                       | 0.27                   | 2.99                | 0.34                    | 4.11                 | 7.11                    |
| C1QA        | seven_HOCA                    | 0.30                   | 3.80                | 0.30                    | 3.31                 | 7.10                    |
| CD5L        | tyrosine                      | 0.36                   | 5.29                | 0.21                    | 1.81                 | 7.10                    |
| KLKB1       | one_arachidoyl_GPE            | 0.39                   | 6.06                | 0.15                    | 1.04                 | 7.10                    |
| SERPINF1    | N6_carbamoylthreonyladenosine | 0.25                   | 2.75                | 0.35                    | 4.35                 | 7.10                    |
| VTN         | sucrose                       | -0.22                  | 2.21                | -0.37                   | 4.89                 | 7.10                    |
| HRG         | X_13553                       | -0.34                  | 4.67                | -0.25                   | 2.43                 | 7.10                    |
| CST3        | hydroxyisovaleroylcarnitine   | 0.30                   | 3.77                | 0.30                    | 3.33                 | 7.10                    |

| gene symbol | metabolite                  | t0 Pearson Correlation | t0 NegLog10 p-value | t24 Pearson Correlation | t24 NegLog10 p-value | Sum of NegLog10 p-value |
|-------------|-----------------------------|------------------------|---------------------|-------------------------|----------------------|-------------------------|
| VASN        | X_12095                     | 0.25                   | 2.74                | 0.35                    | 4.35                 | 7.10                    |
| S100A8      | X_03951                     | 0.38                   | 5.83                | 0.17                    | 1.27                 | 7.10                    |
| AMBP        | X_11255                     | -0.24                  | 2.50                | -0.36                   | 4.60                 | 7.10                    |
| VASN        | X_13553                     | 0.23                   | 2.28                | 0.37                    | 4.81                 | 7.10                    |
| ITIH2       | HPLA                        | -0.33                  | 4.51                | -0.26                   | 2.59                 | 7.10                    |
| TF          | X_06246                     | 0.18                   | 1.52                | 0.40                    | 5.57                 | 7.10                    |
| F12         | X_11245                     | -0.37                  | 5.49                | -0.20                   | 1.60                 | 7.10                    |
| CST3        | X_06126                     | 0.26                   | 2.85                | 0.34                    | 4.24                 | 7.10                    |
| SERPINA1    | one_palmitoyl_GPC           | -0.27                  | 3.07                | -0.33                   | 4.03                 | 7.10                    |
| CRP         | one_eicosatrienoyl_GPC      | -0.33                  | 4.36                | -0.27                   | 2.73                 | 7.09                    |
| APOC2       | X_11317                     | 0.16                   | 1.29                | 0.41                    | 5.80                 | 7.09                    |
| APOC3       | four_acetamidobutanoate     | 0.27                   | 3.07                | 0.33                    | 4.01                 | 7.09                    |
| C1QB        | allantoin                   | 0.39                   | 6.22                | 0.13                    | 0.86                 | 7.09                    |
| COL1A1      | SDMA                        | 0.33                   | 4.37                | 0.27                    | 2.71                 | 7.08                    |
| C1QA        | one_eicosatrienoyl_GPC      | -0.31                  | 3.94                | -0.29                   | 3.15                 | 7.08                    |
| ADIPOQ      | X_11687                     | 0.35                   | 5.07                | 0.22                    | 2.01                 | 7.08                    |
| APOL1       | X_10500                     | 0.33                   | 4.53                | 0.26                    | 2.55                 | 7.08                    |
| SERPINA3    | X_03094                     | -0.40                  | 6.29                | -0.12                   | 0.79                 | 7.08                    |
| LBP         | phenylalanine               | 0.33                   | 4.45                | 0.26                    | 2.63                 | 7.08                    |
| FABP1       | mannose                     | -0.17                  | 1.43                | -0.40                   | 5.64                 | 7.08                    |
| COPB1       | hexadecanedioate            | 0.23                   | 2.32                | 0.37                    | 4.76                 | 7.08                    |
| SPINK1      | one_palmitoyl_GPC           | -0.22                  | 2.09                | -0.37                   | 4.99                 | 7.08                    |
| ECM1        | X_12510                     | 0.21                   | 2.01                | 0.38                    | 5.07                 | 7.08                    |
| PIGR        | X_11795                     | 0.26                   | 2.91                | 0.34                    | 4.17                 | 7.08                    |
| LCN2        | taurochenodeoxycholate      | 0.31                   | 3.87                | 0.30                    | 3.21                 | 7.08                    |
| APOH        | phenylalanine               | -0.26                  | 2.87                | -0.34                   | 4.21                 | 7.07                    |
| VTN         | phosphate                   | -0.24                  | 2.50                | -0.36                   | 4.57                 | 7.07                    |
| CFD         | X_07765                     | 0.39                   | 6.05                | 0.15                    | 1.02                 | 7.07                    |
| APOL1       | N_acetylthreonine           | -0.38                  | 5.78                | -0.17                   | 1.28                 | 7.07                    |
| SERPIND1    | octadecanedioate            | -0.31                  | 3.85                | -0.30                   | 3.21                 | 7.07                    |
| HP          | X_01327                     | -0.27                  | 3.17                | -0.33                   | 3.89                 | 7.07                    |
| VWF         | gamma_glutamylphenylalanine | 0.37                   | 5.48                | 0.19                    | 1.59                 | 7.07                    |
| ORM1        | X_11334                     | 0.25                   | 2.62                | 0.35                    | 4.45                 | 7.07                    |
| APOA2       | X_12855                     | -0.35                  | 4.93                | -0.23                   | 2.14                 | 7.06                    |
| LCN2        | gamma_glutamylphenylalanine | 0.27                   | 3.16                | 0.33                    | 3.90                 | 7.06                    |
| APOA4       | X_07765                     | 0.32                   | 4.23                | 0.28                    | 2.83                 | 7.06                    |
| GPX3        | three_methylhistidine       | -0.20                  | 1.84                | -0.38                   | 5.21                 | 7.06                    |
| A1BG        | isobutyrylcarnitine         | -0.33                  | 4.46                | -0.26                   | 2.60                 | 7.06                    |
| A1BG        | X_10483                     | -0.34                  | 4.62                | -0.25                   | 2.44                 | 7.06                    |
| LYZ         | alpha_ketoglutarate         | 0.30                   | 3.67                | 0.30                    | 3.38                 | 7.06                    |
| CST3        | X_13619                     | -0.28                  | 3.32                | -0.32                   | 3.74                 | 7.06                    |
| PGLYRP2     | prolylhydroxyproline        | -0.31                  | 3.88                | -0.29                   | 3.18                 | 7.06                    |
| SERPINA6    | one_oleoyl_GPC              | -0.32                  | 4.14                | -0.28                   | 2.91                 | 7.05                    |
| CFHR2       | mannitol                    | 0.37                   | 5.50                | 0.19                    | 1.55                 | 7.05                    |
| CFI         | HPLA                        | -0.37                  | 5.39                | -0.20                   | 1.66                 | 7.05                    |
| ECM1        | methionine                  | 0.26                   | 2.90                | 0.34                    | 4.16                 | 7.05                    |
| SAA3P       | X_04629                     | 0.35                   | 4.97                | 0.23                    | 2.09                 | 7.05                    |
| APOA2       | octanoylcarnitine           | -0.34                  | 4.78                | -0.24                   | 2.27                 | 7.05                    |
| RBP4        | X_11315                     | -0.25                  | 2.65                | -0.35                   | 4.40                 | 7.05                    |
| APOH        | p_cresol_sulfate            | 0.35                   | 5.06                | 0.22                    | 1.99                 | 7.05                    |
| SHBG        | X_12104                     | -0.28                  | 3.33                | -0.32                   | 3.72                 | 7.05                    |
| AZGP1       | xylose                      | 0.27                   | 3.00                | 0.34                    | 4.05                 | 7.05                    |
| HBD         | aspartate                   | 0.08                   | 0.51                | 0.43                    | 6.54                 | 7.05                    |
| APOH        | catechol_sulfate            | 0.35                   | 5.04                | 0.22                    | 2.00                 | 7.05                    |
| RNASE1      | X_10439                     | 0.37                   | 5.41                | 0.20                    | 1.64                 | 7.05                    |
| CES1        | stearidonate                | 0.24                   | 2.53                | 0.36                    | 4.51                 | 7.05                    |

| gene symbol | metabolite                 | t0 Pearson Correlation | t0 NegLog10 p-value | t24 Pearson Correlation | t24 NegLog10 p-value | Sum of NegLog10 p-value |
|-------------|----------------------------|------------------------|---------------------|-------------------------|----------------------|-------------------------|
| LCN2        | X_10395                    | -0.33                  | 4.31                | -0.27                   | 2.73                 | 7.04                    |
| AZGP1       | phosphate                  | 0.34                   | 4.76                | 0.24                    | 2.29                 | 7.04                    |
| APCS        | palmitoleate               | -0.32                  | 4.17                | -0.28                   | 2.87                 | 7.04                    |
| RBP4        | X_11261                    | 0.22                   | 2.24                | 0.37                    | 4.80                 | 7.04                    |
| AZGP1       | three_methylhistidine      | 0.35                   | 4.87                | 0.24                    | 2.17                 | 7.04                    |
| SAA3P       | seven_HOCA                 | -0.29                  | 3.50                | -0.31                   | 3.54                 | 7.04                    |
| PLG         | one_linoleoyl_GPC          | 0.22                   | 2.10                | 0.37                    | 4.94                 | 7.04                    |
| ORM2        | three_indoxyl_sulfate      | 0.21                   | 1.97                | 0.38                    | 5.07                 | 7.04                    |
| GC          | HPLA                       | -0.27                  | 3.07                | -0.33                   | 3.97                 | 7.04                    |
| S100A9      | one_arachidoyl_GPE         | -0.21                  | 1.95                | -0.38                   | 5.08                 | 7.04                    |
| SAA3P       | X_04495                    | 0.38                   | 5.69                | 0.18                    | 1.35                 | 7.04                    |
| VSIG4       | X_12117                    | 0.37                   | 5.58                | 0.18                    | 1.45                 | 7.03                    |
| AMBP        | X_12855                    | 0.36                   | 5.33                | 0.20                    | 1.70                 | 7.03                    |
| AHSG        | X_11273                    | -0.27                  | 3.13                | -0.33                   | 3.90                 | 7.03                    |
| APOC3       | X_11437                    | 0.18                   | 1.62                | 0.39                    | 5.40                 | 7.03                    |
| GPX3        | two_hydroxypalmitate       | 0.34                   | 4.73                | 0.24                    | 2.30                 | 7.03                    |
| REG1A       | X_12749                    | 0.24                   | 2.47                | 0.36                    | 4.55                 | 7.03                    |
| FCGBP       | pseudouridine              | 0.27                   | 3.15                | 0.33                    | 3.87                 | 7.02                    |
| DEFA1       | one_oleoyl_GPE             | -0.18                  | 1.60                | -0.39                   | 5.42                 | 7.02                    |
| S100A8      | one_methylimidazoleacetate | 0.30                   | 3.76                | 0.30                    | 3.27                 | 7.02                    |
| VWF         | X_12458                    | 0.16                   | 1.34                | 0.40                    | 5.68                 | 7.02                    |
| VASN        | X_14658                    | 0.31                   | 3.88                | 0.29                    | 3.14                 | 7.02                    |
| ORM2        | pyridoxate                 | 0.25                   | 2.64                | 0.35                    | 4.38                 | 7.02                    |
| APOC3       | X_10266                    | 0.35                   | 4.90                | 0.23                    | 2.12                 | 7.02                    |
| AFM         | X_11429                    | -0.34                  | 4.57                | -0.25                   | 2.44                 | 7.02                    |
| LGALS3BP    | caffeine                   | 0.32                   | 4.26                | 0.27                    | 2.76                 | 7.02                    |
| SERPIND1    | malate                     | -0.23                  | 2.38                | -0.36                   | 4.63                 | 7.02                    |
| GPX3        | X_07765                    | -0.28                  | 3.32                | -0.32                   | 3.70                 | 7.01                    |
| LYZ         | X_07765                    | 0.35                   | 4.86                | 0.23                    | 2.15                 | 7.01                    |
| COL11A2     | alpha_ketoglutarate        | 0.32                   | 4.24                | 0.27                    | 2.77                 | 7.01                    |
| ACTA2       | X_04357                    | 0.19                   | 1.77                | 0.38                    | 5.24                 | 7.01                    |
| COPB1       | octadecanedioate           | 0.22                   | 2.13                | 0.37                    | 4.88                 | 7.01                    |
| VASN        | pyridoxate                 | 0.27                   | 3.04                | 0.33                    | 3.97                 | 7.01                    |
| APOA2       | X_08402                    | 0.33                   | 4.31                | 0.27                    | 2.69                 | 7.01                    |
| CRP         | X_12802                    | 0.34                   | 4.59                | 0.25                    | 2.42                 | 7.01                    |
| TF          | prolylhydroxyproline       | -0.30                  | 3.62                | -0.30                   | 3.38                 | 7.00                    |
| TIMP1       | one_oleoyl_GPE             | -0.17                  | 1.44                | -0.40                   | 5.56                 | 7.00                    |
| KLKB1       | X_03056                    | -0.37                  | 5.45                | -0.19                   | 1.55                 | 7.00                    |
| CFD         | pantothenate               | 0.30                   | 3.68                | 0.30                    | 3.32                 | 7.00                    |
| S100A9      | two_palmitoyl_GPC          | -0.14                  | 1.10                | -0.41                   | 5.90                 | 7.00                    |
| LYZ         | citrulline                 | 0.26                   | 2.92                | 0.34                    | 4.08                 | 7.00                    |
| IGFBP4      | X_11593                    | 0.37                   | 5.62                | 0.18                    | 1.38                 | 7.00                    |
| ORM1        | xylonate                   | 0.30                   | 3.68                | 0.30                    | 3.32                 | 7.00                    |
| SHBG        | X_04629                    | -0.35                  | 5.06                | -0.22                   | 1.94                 | 7.00                    |
| HRG         | two_palmitoyl_GPC          | 0.26                   | 2.98                | 0.33                    | 4.02                 | 6.99                    |
| COL1A1      | hippurate                  | 0.36                   | 5.21                | 0.21                    | 1.78                 | 6.99                    |
| S100A9      | X_04498                    | 0.31                   | 3.89                | 0.29                    | 3.11                 | 6.99                    |
| ADIPOQ      | X_04507                    | 0.32                   | 4.22                | 0.27                    | 2.77                 | 6.99                    |
| AHSG        | X_12611                    | -0.26                  | 2.84                | -0.34                   | 4.16                 | 6.99                    |
| PIGR        | X_03056                    | -0.41                  | 6.57                | -0.08                   | 0.41                 | 6.99                    |
| KNG1        | one_arachidoyl_GPC         | 0.27                   | 3.12                | 0.33                    | 3.87                 | 6.99                    |
| VWF         | betaine                    | 0.34                   | 4.72                | 0.24                    | 2.27                 | 6.99                    |
| GSN         | catechol_sulfate           | 0.21                   | 2.03                | 0.37                    | 4.96                 | 6.99                    |
| RNASE1      | hexanoylcarnitine          | 0.16                   | 1.29                | 0.40                    | 5.69                 | 6.99                    |
| SERPINC1    | one_palmitoleoyl_GPC       | 0.25                   | 2.68                | 0.35                    | 4.30                 | 6.99                    |
| VASN        | X_11826                    | 0.28                   | 3.24                | 0.32                    | 3.74                 | 6.98                    |

| gene symbol | metabolite                    | t0 Pearson Correlation | t0 NegLog10 p-value | t24 Pearson Correlation | t24 NegLog10 p-value | Sum of NegLog10 p-value |
|-------------|-------------------------------|------------------------|---------------------|-------------------------|----------------------|-------------------------|
| S100A9      | X_04495                       | 0.33                   | 4.45                | 0.26                    | 2.53                 | 6.98                    |
| TTR         | two_palmitoyl_GPC             | 0.29                   | 3.56                | 0.31                    | 3.42                 | 6.98                    |
| VSIG4       | hexanoylcarnitine             | 0.32                   | 4.07                | 0.28                    | 2.91                 | 6.98                    |
| APOH        | HPLA                          | -0.31                  | 3.88                | -0.29                   | 3.10                 | 6.98                    |
| SPINK1      | X_11838                       | 0.20                   | 1.86                | 0.38                    | 5.12                 | 6.98                    |
| C1QA        | one_arachidoyl_GPC            | -0.30                  | 3.70                | -0.30                   | 3.27                 | 6.97                    |
| CST3        | X_12844                       | 0.19                   | 1.71                | 0.39                    | 5.26                 | 6.97                    |
| AFM         | X_11452                       | 0.30                   | 3.70                | 0.30                    | 3.27                 | 6.97                    |
| C8G         | SDMA                          | -0.27                  | 3.05                | -0.33                   | 3.92                 | 6.97                    |
| ORM1        | X_04498                       | 0.32                   | 4.17                | 0.27                    | 2.80                 | 6.97                    |
| LYZ         | X_04498                       | 0.41                   | 6.65                | 0.06                    | 0.32                 | 6.96                    |
| ITIH2       | one_arachidoyl_GPC            | 0.29                   | 3.45                | 0.31                    | 3.52                 | 6.96                    |
| SERPINF1    | erythronate                   | 0.28                   | 3.25                | 0.32                    | 3.72                 | 6.96                    |
| LCN2        | X_11510                       | 0.30                   | 3.76                | 0.30                    | 3.21                 | 6.96                    |
| SERPIND1    | seven_HOCA                    | -0.28                  | 3.34                | -0.32                   | 3.63                 | 6.96                    |
| ORM2        | arabitol                      | 0.29                   | 3.51                | 0.31                    | 3.45                 | 6.96                    |
| HBA1        | aspartate                     | 0.07                   | 0.39                | 0.43                    | 6.57                 | 6.96                    |
| DEFA1       | cortisol                      | 0.19                   | 1.67                | 0.39                    | 5.29                 | 6.96                    |
| CFI         | X_14658                       | -0.33                  | 4.51                | -0.25                   | 2.45                 | 6.96                    |
| APOH        | X_09789                       | 0.30                   | 3.73                | 0.30                    | 3.23                 | 6.96                    |
| ITIH3       | X_11452                       | -0.36                  | 5.10                | -0.21                   | 1.85                 | 6.96                    |
| ITIH1       | one_stearoyl_GPC              | 0.24                   | 2.52                | 0.35                    | 4.44                 | 6.96                    |
| CD14        | X_12695                       | 0.27                   | 3.13                | 0.33                    | 3.82                 | 6.96                    |
| VSIG4       | X_10395                       | -0.20                  | 1.90                | -0.38                   | 5.05                 | 6.95                    |
| FCGBP       | X_12855                       | 0.31                   | 3.99                | 0.28                    | 2.96                 | 6.95                    |
| LYZ         | four_vinylphenol_sulfate      | 0.34                   | 4.65                | 0.24                    | 2.30                 | 6.95                    |
| FBLN1       | N_acetylaniline               | 0.23                   | 2.41                | 0.36                    | 4.54                 | 6.95                    |
| SAA3P       | N_acetylthreonine             | 0.41                   | 6.82                | 0.03                    | 0.13                 | 6.95                    |
| APOC3       | X_12611                       | 0.31                   | 3.91                | 0.29                    | 3.03                 | 6.95                    |
| C1QB        | X_12095                       | 0.39                   | 6.13                | 0.13                    | 0.81                 | 6.94                    |
| KNG1        | X_07765                       | 0.33                   | 4.37                | 0.26                    | 2.57                 | 6.94                    |
| LUM         | hydroxyproline                | 0.23                   | 2.38                | 0.36                    | 4.55                 | 6.94                    |
| ADIPOQ      | X_12217                       | 0.32                   | 4.28                | 0.27                    | 2.66                 | 6.94                    |
| RNASE1      | pelargonate                   | -0.23                  | 2.31                | -0.36                   | 4.62                 | 6.94                    |
| PLG         | X_12458                       | -0.24                  | 2.58                | -0.35                   | 4.35                 | 6.93                    |
| APOA1       | tiglyl_carnitine              | -0.26                  | 2.91                | -0.33                   | 4.02                 | 6.93                    |
| GPX3        | X_11437                       | -0.30                  | 3.78                | -0.29                   | 3.16                 | 6.93                    |
| LRG1        | X_06246                       | -0.21                  | 2.00                | -0.37                   | 4.94                 | 6.93                    |
| ADIPOQ      | phosphate                     | 0.36                   | 5.15                | 0.21                    | 1.78                 | 6.93                    |
| DEFA1       | two_palmitoyl_GPC             | -0.07                  | 0.38                | -0.43                   | 6.55                 | 6.93                    |
| AMBP        | X_11175                       | 0.29                   | 3.58                | 0.30                    | 3.35                 | 6.93                    |
| A1BG        | X_12100                       | -0.34                  | 4.57                | -0.25                   | 2.36                 | 6.93                    |
| GPX3        | X_12749                       | -0.27                  | 3.17                | -0.32                   | 3.76                 | 6.93                    |
| VSIG4       | arabitol                      | 0.34                   | 4.56                | 0.25                    | 2.36                 | 6.93                    |
| PGLYRP2     | N6_carbamoylthreonyladenosine | -0.25                  | 2.72                | -0.34                   | 4.21                 | 6.93                    |
| DEFA1       | X_12099                       | 0.25                   | 2.67                | 0.34                    | 4.25                 | 6.92                    |
| SPINK1      | one_stearoyl_GPC              | -0.13                  | 0.90                | -0.41                   | 6.02                 | 6.92                    |
| APOH        | X_10359                       | 0.33                   | 4.52                | 0.25                    | 2.40                 | 6.92                    |
| ORM1        | X_13553                       | 0.24                   | 2.50                | 0.35                    | 4.42                 | 6.92                    |
| VASN        | X_12749                       | 0.29                   | 3.59                | 0.30                    | 3.33                 | 6.92                    |
| C1QA        | X_12458                       | 0.34                   | 4.61                | 0.24                    | 2.31                 | 6.92                    |
| APOL1       | taurochenodeoxycholate        | -0.41                  | 6.82                | -0.02                   | 0.10                 | 6.91                    |
| LYZ         | X_05907                       | 0.24                   | 2.54                | 0.35                    | 4.37                 | 6.91                    |
| APOC3       | phenylacetylglutamine         | 0.30                   | 3.66                | 0.30                    | 3.25                 | 6.91                    |
| SPINK1      | X_04507                       | 0.34                   | 4.77                | 0.23                    | 2.14                 | 6.91                    |
| TF          | one_methylimidazoleacetate    | -0.25                  | 2.77                | -0.34                   | 4.14                 | 6.91                    |

| gene symbol | metabolite                    | t0 Pearson Correlation | t0 NegLog10 p-value | t24 Pearson Correlation | t24 NegLog10 p-value | Sum of NegLog10 p-value |
|-------------|-------------------------------|------------------------|---------------------|-------------------------|----------------------|-------------------------|
| COL1A1      | X_12688                       | 0.36                   | 5.09                | 0.21                    | 1.82                 | 6.91                    |
| A2M         | X_12510                       | 0.23                   | 2.33                | 0.36                    | 4.58                 | 6.91                    |
| AFM         | X_12611                       | -0.33                  | 4.44                | -0.25                   | 2.47                 | 6.91                    |
| GPX3        | X_12092                       | -0.33                  | 4.51                | -0.25                   | 2.39                 | 6.91                    |
| LCP1        | X_04357                       | 0.40                   | 6.44                | 0.08                    | 0.47                 | 6.91                    |
| COL3A1      | gamma_glutamyltyrosine        | 0.40                   | 6.35                | 0.10                    | 0.56                 | 6.91                    |
| CES1        | lactate                       | 0.34                   | 4.57                | 0.25                    | 2.34                 | 6.91                    |
| TF          | tyrosine                      | 0.15                   | 1.22                | 0.40                    | 5.68                 | 6.91                    |
| TF          | pseudouridine                 | -0.32                  | 4.13                | -0.27                   | 2.77                 | 6.90                    |
| SERPINF1    | X_12855                       | 0.35                   | 5.01                | 0.22                    | 1.89                 | 6.90                    |
| RNASE1      | X_11521                       | 0.21                   | 1.97                | 0.37                    | 4.92                 | 6.90                    |
| FBLN1       | N2_N2_dimethylguanosine       | 0.26                   | 2.97                | 0.33                    | 3.93                 | 6.90                    |
| ULK4        | malate                        | -0.28                  | 3.31                | -0.31                   | 3.58                 | 6.90                    |
| S100A9      | one_palmitoleoyl_GPC          | -0.22                  | 2.24                | -0.36                   | 4.65                 | 6.90                    |
| SERPINA3    | X_11245                       | 0.28                   | 3.37                | 0.31                    | 3.53                 | 6.90                    |
| FN1         | alpha_hydroxyisovalerate      | 0.02                   | 0.11                | 0.44                    | 6.78                 | 6.89                    |
| AMBP        | three_methyl_2_oxovalerate    | -0.31                  | 3.94                | -0.28                   | 2.95                 | 6.89                    |
| DEFA1       | tryptophan                    | -0.14                  | 1.07                | -0.41                   | 5.82                 | 6.89                    |
| FABP1       | taurocholate                  | 0.19                   | 1.76                | 0.38                    | 5.13                 | 6.89                    |
| SAA4        | taurochenodeoxycholate        | -0.34                  | 4.66                | -0.24                   | 2.23                 | 6.89                    |
| GPX3        | X_12611                       | -0.36                  | 5.22                | -0.20                   | 1.67                 | 6.88                    |
| A1BG        | X_12458                       | -0.33                  | 4.44                | -0.25                   | 2.45                 | 6.88                    |
| APCS        | X_12442                       | -0.29                  | 3.60                | -0.30                   | 3.29                 | 6.88                    |
| PGLYRP2     | one_arachidoyl_GPC            | 0.29                   | 3.42                | 0.31                    | 3.47                 | 6.88                    |
| VASN        | creatinine                    | 0.28                   | 3.23                | 0.32                    | 3.65                 | 6.88                    |
| CAT         | tyrosine                      | 0.28                   | 3.29                | 0.31                    | 3.59                 | 6.88                    |
| SERPIND1    | one_palmitoyl_GPC             | 0.31                   | 4.05                | 0.28                    | 2.83                 | 6.88                    |
| HPX         | methionine                    | -0.29                  | 3.51                | -0.30                   | 3.37                 | 6.88                    |
| APOL1       | allantoin                     | -0.40                  | 6.45                | -0.08                   | 0.43                 | 6.88                    |
| APOC3       | p_acetamidophenylglucuronide  | 0.26                   | 2.93                | 0.33                    | 3.95                 | 6.88                    |
| SERPINC1    | glycochenodeoxycholate        | -0.35                  | 4.88                | -0.22                   | 2.00                 | 6.88                    |
| APOA4       | hippurate                     | 0.37                   | 5.39                | 0.19                    | 1.49                 | 6.88                    |
| LUM         | N6_carbamoylthreonyladenosine | 0.29                   | 3.56                | 0.30                    | 3.32                 | 6.88                    |
| LCN2        | phenylalanine                 | 0.29                   | 3.49                | 0.30                    | 3.39                 | 6.88                    |
| COPB1       | X_12442                       | 0.22                   | 2.17                | 0.36                    | 4.71                 | 6.88                    |
| MB          | one_linoleoyl_GPC             | -0.22                  | 2.09                | -0.37                   | 4.79                 | 6.88                    |
| TTR         | X_08402                       | 0.32                   | 4.28                | 0.26                    | 2.60                 | 6.87                    |
| CFHR2       | threonine                     | -0.33                  | 4.48                | -0.25                   | 2.39                 | 6.87                    |
| HBB         | aspartate                     | 0.12                   | 0.82                | 0.41                    | 6.05                 | 6.87                    |
| SHBG        | N6_carbamoylthreonyladenosine | -0.28                  | 3.27                | -0.31                   | 3.60                 | 6.87                    |
| GPX3        | xylonate                      | -0.32                  | 4.17                | -0.27                   | 2.70                 | 6.87                    |
| PLG         | octadecanedioate              | -0.26                  | 2.81                | -0.34                   | 4.06                 | 6.87                    |
| KLKB1       | beta_hydroxyisovalerate       | -0.40                  | 6.30                | -0.10                   | 0.56                 | 6.87                    |
| VASN        | phenylacetylglutamine         | 0.31                   | 3.90                | 0.28                    | 2.97                 | 6.87                    |
| SERPINA1    | X_12794                       | 0.28                   | 3.37                | 0.31                    | 3.49                 | 6.86                    |
| VSIG4       | X_11538                       | 0.20                   | 1.87                | 0.37                    | 4.99                 | 6.86                    |
| DEFA1       | X_12695                       | 0.17                   | 1.48                | 0.39                    | 5.37                 | 6.86                    |
| ECM1        | X_11538                       | 0.28                   | 3.22                | 0.32                    | 3.64                 | 6.86                    |
| LUM         | mannose                       | -0.25                  | 2.77                | -0.34                   | 4.08                 | 6.85                    |
| S100A8      | X_12217                       | 0.29                   | 3.54                | 0.30                    | 3.32                 | 6.85                    |
| MB          | decanoylcarnitine             | 0.30                   | 3.75                | 0.29                    | 3.11                 | 6.85                    |
| RNASE1      | three_methyl_2_oxovalerate    | -0.22                  | 2.23                | -0.36                   | 4.62                 | 6.85                    |
| APOH        | X_11261                       | 0.34                   | 4.59                | 0.24                    | 2.26                 | 6.85                    |
| VTN         | urea                          | -0.28                  | 3.29                | -0.31                   | 3.56                 | 6.85                    |
| REG1A       | gamma_glutamylphenylalanine   | 0.27                   | 3.07                | 0.32                    | 3.78                 | 6.85                    |
| KNG1        | X_11245                       | -0.29                  | 3.54                | -0.30                   | 3.31                 | 6.85                    |

| gene symbol | metabolite               | t0 Pearson Correlation | t0 NegLog10 p-value | t24 Pearson Correlation | t24 NegLog10 p-value | Sum of NegLog10 p-value |
|-------------|--------------------------|------------------------|---------------------|-------------------------|----------------------|-------------------------|
| AMBP        | X_11843                  | 0.28                   | 3.30                | 0.31                    | 3.55                 | 6.85                    |
| APOA4       | piperine                 | 0.32                   | 4.25                | 0.26                    | 2.60                 | 6.85                    |
| C4BPA       | laurate                  | -0.29                  | 3.44                | -0.31                   | 3.41                 | 6.85                    |
| A1BG        | X_12802                  | -0.34                  | 4.76                | -0.23                   | 2.09                 | 6.85                    |
| ORM1        | X_12095                  | 0.22                   | 2.11                | 0.36                    | 4.74                 | 6.85                    |
| ECM1        | hydroxyproline           | 0.21                   | 1.98                | 0.37                    | 4.87                 | 6.85                    |
| ADIPOQ      | four_acetamidobutanoate  | 0.32                   | 4.23                | 0.26                    | 2.61                 | 6.85                    |
| RBMX        | X_11510                  | 0.30                   | 3.82                | 0.29                    | 3.02                 | 6.84                    |
| SERPINC1    | HPLA                     | -0.33                  | 4.36                | -0.25                   | 2.48                 | 6.84                    |
| LGALS3BP    | hexadecanedioate         | 0.26                   | 2.97                | 0.33                    | 3.88                 | 6.84                    |
| FCGBP       | X_11843                  | 0.21                   | 2.04                | 0.37                    | 4.80                 | 6.84                    |
| APOL1       | X_12458                  | -0.36                  | 5.08                | -0.21                   | 1.76                 | 6.84                    |
| LBP         | X_03056                  | 0.36                   | 5.17                | 0.20                    | 1.67                 | 6.84                    |
| FABP1       | lysine                   | 0.31                   | 3.98                | 0.28                    | 2.85                 | 6.84                    |
| APOH        | X_12405                  | 0.34                   | 4.63                | 0.24                    | 2.21                 | 6.84                    |
| SERPINA1    | one_palmitoleoyl_GPC     | -0.32                  | 4.20                | -0.26                   | 2.64                 | 6.84                    |
| RBP4        | X_02973                  | 0.25                   | 2.74                | 0.34                    | 4.10                 | 6.84                    |
| TTR         | one_linoleoyl_GPC        | 0.25                   | 2.74                | 0.34                    | 4.10                 | 6.84                    |
| S100A8      | X_11421                  | 0.33                   | 4.46                | 0.25                    | 2.38                 | 6.84                    |
| SAA4        | seven_HOCA               | -0.36                  | 5.13                | -0.20                   | 1.70                 | 6.83                    |
| APOA4       | phenol_sulfate           | 0.36                   | 5.09                | 0.21                    | 1.74                 | 6.83                    |
| ITIH2       | X_12100                  | -0.30                  | 3.72                | -0.29                   | 3.11                 | 6.83                    |
| C4BPA       | two_hydroxypalmitate     | -0.37                  | 5.63                | -0.16                   | 1.21                 | 6.83                    |
| LUM         | X_11423                  | 0.28                   | 3.33                | 0.31                    | 3.51                 | 6.83                    |
| TF          | alanine                  | 0.17                   | 1.41                | 0.39                    | 5.42                 | 6.83                    |
| COPB1       | pipecolate               | 0.33                   | 4.39                | 0.25                    | 2.44                 | 6.83                    |
| SHBG        | epiandrosterone_sulfate  | -0.34                  | 4.62                | -0.24                   | 2.21                 | 6.83                    |
| S100A8      | X_12117                  | 0.35                   | 4.98                | 0.21                    | 1.84                 | 6.83                    |
| HRG         | X_05907                  | 0.24                   | 2.55                | 0.35                    | 4.27                 | 6.83                    |
| SERPINC1    | pipecolate               | -0.35                  | 4.84                | -0.22                   | 1.99                 | 6.83                    |
| CLU         | one_oleoyl_GPC           | 0.26                   | 2.80                | 0.33                    | 4.03                 | 6.83                    |
| FBLN1       | X_12855                  | 0.21                   | 1.97                | 0.37                    | 4.86                 | 6.83                    |
| SAA3P       | one_five_anhydroglucitol | -0.24                  | 2.48                | -0.35                   | 4.35                 | 6.82                    |
| CLU         | X_11445                  | -0.31                  | 3.92                | -0.28                   | 2.90                 | 6.82                    |
| PON1        | pseudouridine            | -0.27                  | 3.14                | -0.32                   | 3.68                 | 6.82                    |
| C4BPB       | glycochenodeoxycholate   | -0.29                  | 3.57                | -0.30                   | 3.25                 | 6.82                    |
| TIMP1       | butyrylcarnitine         | 0.23                   | 2.37                | 0.35                    | 4.45                 | 6.82                    |
| RBP4        | myo_inositol             | 0.22                   | 2.12                | 0.36                    | 4.70                 | 6.82                    |
| SPINK1      | arabinose                | 0.31                   | 3.93                | 0.28                    | 2.89                 | 6.82                    |
| MB          | one_palmitoyl_GPC        | -0.20                  | 1.80                | -0.38                   | 5.02                 | 6.82                    |
| SPINK1      | xylonate                 | 0.34                   | 4.56                | 0.24                    | 2.25                 | 6.82                    |
| PTGDS       | X_11787                  | -0.31                  | 3.88                | -0.28                   | 2.93                 | 6.81                    |
| LBP         | X_11444                  | 0.28                   | 3.20                | 0.32                    | 3.61                 | 6.81                    |
| VWF         | X_13553                  | 0.32                   | 4.16                | 0.26                    | 2.64                 | 6.81                    |
| AHSG        | one_oleoyl_GPE           | 0.26                   | 2.94                | 0.33                    | 3.87                 | 6.81                    |
| HPR         | myristoleate             | -0.31                  | 3.86                | -0.28                   | 2.94                 | 6.81                    |
| KNG1        | creatine                 | -0.27                  | 3.16                | -0.32                   | 3.64                 | 6.80                    |
| AZGP1       | X_12860                  | 0.32                   | 4.28                | 0.26                    | 2.52                 | 6.80                    |
| AZGP1       | cysteine                 | 0.33                   | 4.40                | 0.25                    | 2.41                 | 6.80                    |
| PON1        | X_12850                  | -0.37                  | 5.53                | -0.17                   | 1.27                 | 6.80                    |
| ADIPOQ      | X_05426                  | 0.33                   | 4.50                | 0.24                    | 2.30                 | 6.80                    |
| FCGBP       | butyrylcarnitine         | 0.29                   | 3.49                | 0.30                    | 3.31                 | 6.80                    |
| KLKB1       | N_acetylthreonine        | -0.35                  | 4.94                | -0.21                   | 1.85                 | 6.80                    |
| C8G         | X_13553                  | -0.21                  | 2.07                | -0.36                   | 4.73                 | 6.80                    |
| ORM1        | urea                     | 0.33                   | 4.50                | 0.24                    | 2.30                 | 6.80                    |
| SAA3P       | gluconate                | 0.34                   | 4.61                | 0.24                    | 2.19                 | 6.80                    |

| gene symbol | metabolite                    | t0 Pearson Correlation | t0 NegLog10 p-value | t24 Pearson Correlation | t24 NegLog10 p-value | Sum of NegLog10 p-value |
|-------------|-------------------------------|------------------------|---------------------|-------------------------|----------------------|-------------------------|
| AZGP1       | N_acetylneuraminate           | 0.30                   | 3.73                | 0.29                    | 3.06                 | 6.80                    |
| LCN2        | pipecolate                    | 0.33                   | 4.47                | 0.25                    | 2.32                 | 6.79                    |
| APOH        | one_arachidoyl_GPE            | 0.30                   | 3.65                | 0.29                    | 3.14                 | 6.79                    |
| C1QA        | X_12688                       | 0.29                   | 3.50                | 0.30                    | 3.29                 | 6.79                    |
| VWF         | one_palmitoleoyl_GPC          | -0.28                  | 3.22                | -0.31                   | 3.57                 | 6.79                    |
| B2M         | X_11843                       | 0.28                   | 3.37                | 0.31                    | 3.41                 | 6.79                    |
| SAA1        | X_11470                       | 0.28                   | 3.33                | 0.31                    | 3.45                 | 6.79                    |
| PLG         | urea                          | -0.18                  | 1.62                | -0.38                   | 5.17                 | 6.79                    |
| APOA4       | indolelactate                 | 0.33                   | 4.52                | 0.24                    | 2.26                 | 6.79                    |
| SAA1        | one_arachidoyl_GPE            | -0.35                  | 4.97                | -0.21                   | 1.81                 | 6.78                    |
| FN1         | caffeine                      | 0.13                   | 0.96                | 0.41                    | 5.82                 | 6.78                    |
| HRG         | X_14658                       | -0.34                  | 4.56                | -0.24                   | 2.22                 | 6.78                    |
| COL3A1      | X_11538                       | 0.34                   | 4.78                | 0.22                    | 2.00                 | 6.78                    |
| APOD        | alpha_ketoglutarate           | 0.32                   | 4.22                | 0.26                    | 2.55                 | 6.78                    |
| SHBG        | X_11440                       | -0.36                  | 5.33                | -0.18                   | 1.44                 | 6.78                    |
| PON1        | X_11687                       | -0.21                  | 2.00                | -0.37                   | 4.77                 | 6.77                    |
| TIMP1       | octanoylcarnitine             | 0.23                   | 2.34                | 0.35                    | 4.43                 | 6.77                    |
| SERPIND1    | X_11510                       | -0.29                  | 3.54                | -0.30                   | 3.24                 | 6.77                    |
| SAA1        | X_01327                       | -0.31                  | 4.01                | -0.27                   | 2.76                 | 6.77                    |
| FBLN1       | X_12206                       | 0.29                   | 3.54                | 0.30                    | 3.23                 | 6.77                    |
| SERPINA6    | deoxycarnitine                | 0.33                   | 4.40                | 0.25                    | 2.38                 | 6.77                    |
| ITIH2       | phenylalanine                 | -0.34                  | 4.67                | -0.23                   | 2.10                 | 6.77                    |
| GPX3        | myristoleate                  | 0.34                   | 4.72                | 0.23                    | 2.04                 | 6.77                    |
| ORM1        | citrate                       | -0.34                  | 4.70                | -0.23                   | 2.07                 | 6.77                    |
| PON1        | X_05907                       | 0.28                   | 3.25                | 0.31                    | 3.52                 | 6.77                    |
| TF          | X_03951                       | -0.29                  | 3.47                | -0.30                   | 3.29                 | 6.77                    |
| RBMX        | octadecanedioate              | 0.24                   | 2.60                | 0.34                    | 4.17                 | 6.77                    |
| PON1        | one_arachidoyl_GPC            | 0.30                   | 3.68                | 0.29                    | 3.08                 | 6.77                    |
| VTN         | X_12405                       | -0.25                  | 2.66                | -0.34                   | 4.11                 | 6.77                    |
| HRG         | X_11538                       | -0.32                  | 4.13                | -0.26                   | 2.64                 | 6.76                    |
| APOE        | X_14662                       | 0.28                   | 3.25                | 0.31                    | 3.52                 | 6.76                    |
| LCN2        | X_12850                       | 0.34                   | 4.70                | 0.23                    | 2.07                 | 6.76                    |
| CST3        | X_08889                       | 0.16                   | 1.28                | 0.39                    | 5.48                 | 6.76                    |
| VASN        | X_10266                       | 0.22                   | 2.16                | 0.36                    | 4.60                 | 6.76                    |
| COL1A1      | N2_N2_dimethylguanosine       | 0.35                   | 4.92                | 0.21                    | 1.84                 | 6.76                    |
| AFM         | dihomolinolenate              | 0.38                   | 5.72                | 0.15                    | 1.03                 | 6.76                    |
| GPX3        | X_11850                       | -0.29                  | 3.54                | -0.30                   | 3.22                 | 6.76                    |
| SERPINA1    | piperine                      | -0.24                  | 2.54                | -0.34                   | 4.21                 | 6.76                    |
| CFH         | creatine                      | -0.29                  | 3.46                | -0.30                   | 3.30                 | 6.76                    |
| SERPINF1    | phenylacetylglutamine         | 0.21                   | 2.03                | 0.36                    | 4.72                 | 6.75                    |
| SERPINC1    | X_14658                       | -0.32                  | 4.17                | -0.26                   | 2.58                 | 6.75                    |
| S100A9      | X_11421                       | 0.26                   | 2.88                | 0.33                    | 3.87                 | 6.75                    |
| FCGBP       | arabinose                     | 0.27                   | 3.04                | 0.32                    | 3.70                 | 6.75                    |
| RBMX        | X_10395                       | -0.32                  | 4.28                | -0.25                   | 2.46                 | 6.74                    |
| PON1        | X_14658                       | -0.37                  | 5.54                | -0.16                   | 1.20                 | 6.74                    |
| FBLN1       | X_04629                       | 0.26                   | 2.93                | 0.32                    | 3.81                 | 6.74                    |
| VASN        | X_11593                       | 0.29                   | 3.56                | 0.29                    | 3.18                 | 6.74                    |
| LRG1        | glutamate                     | -0.31                  | 3.94                | -0.27                   | 2.80                 | 6.74                    |
| SERPIND1    | methionine                    | -0.29                  | 3.57                | -0.29                   | 3.16                 | 6.74                    |
| PON1        | N6_carbamoylthreonyladenosine | -0.23                  | 2.26                | -0.35                   | 4.47                 | 6.74                    |
| LCN2        | X_12095                       | 0.30                   | 3.69                | 0.29                    | 3.04                 | 6.73                    |
| AHSG        | alpha_ketobutyrate            | -0.28                  | 3.21                | -0.31                   | 3.52                 | 6.73                    |
| REG1A       | two_methylbutyroylcarnitine   | 0.20                   | 1.80                | 0.37                    | 4.94                 | 6.73                    |
| APOA2       | octadecanedioate              | -0.32                  | 4.23                | -0.26                   | 2.51                 | 6.73                    |
| AZGP1       | X_12802                       | 0.28                   | 3.29                | 0.31                    | 3.44                 | 6.73                    |
| C1QC        | seven_HOCA                    | 0.25                   | 2.77                | 0.33                    | 3.97                 | 6.73                    |



| gene symbol | metabolite                       | t0 Pearson Correlation | t0 NegLog10 p-value | t24 Pearson Correlation | t24 NegLog10 p-value | Sum of NegLog10 p-value |
|-------------|----------------------------------|------------------------|---------------------|-------------------------|----------------------|-------------------------|
| IGFBP4      | prolylhydroxyproline             | 0.40                   | 6.37                | 0.07                    | 0.36                 | 6.73                    |
| REG1A       | cysteine                         | 0.25                   | 2.77                | 0.33                    | 3.96                 | 6.73                    |
| KNG1        | X_03056                          | -0.31                  | 3.89                | -0.28                   | 2.84                 | 6.73                    |
| CFD         | N_acetylthreonine                | 0.23                   | 2.34                | 0.35                    | 4.39                 | 6.73                    |
| VSIG4       | mannitol                         | 0.28                   | 3.36                | 0.30                    | 3.37                 | 6.73                    |
| APOH        | X_14658                          | -0.28                  | 3.31                | -0.31                   | 3.42                 | 6.73                    |
| APOA4       | X_12117                          | 0.32                   | 4.22                | 0.26                    | 2.51                 | 6.73                    |
| ABCA13      | tryptophan                       | 0.23                   | 2.32                | 0.35                    | 4.41                 | 6.73                    |
| SHBG        | X_11444                          | -0.37                  | 5.51                | -0.16                   | 1.22                 | 6.73                    |
| LRG1        | glutamine                        | -0.29                  | 3.45                | -0.30                   | 3.27                 | 6.73                    |
| REG1A       | X_12101                          | 0.27                   | 3.16                | 0.31                    | 3.56                 | 6.73                    |
| VSIG4       | X_14658                          | 0.19                   | 1.71                | 0.38                    | 5.01                 | 6.72                    |
| APOD        | glycerol_3_phosphate             | 0.31                   | 4.06                | 0.27                    | 2.66                 | 6.72                    |
| LRG1        | glycine                          | -0.16                  | 1.29                | -0.39                   | 5.43                 | 6.72                    |
| C1QC        | taurocholate                     | 0.33                   | 4.42                | 0.24                    | 2.31                 | 6.72                    |
| REG1A       | prolylhydroxyproline             | 0.23                   | 2.38                | 0.35                    | 4.33                 | 6.72                    |
| AMBP        | X_11421                          | 0.32                   | 4.17                | 0.26                    | 2.54                 | 6.72                    |
| CFHR2       | urea                             | 0.30                   | 3.75                | 0.28                    | 2.96                 | 6.71                    |
| S100A9      | four_acetamidobutanoate          | 0.29                   | 3.42                | 0.30                    | 3.29                 | 6.71                    |
| C4BPB       | alpha_hydroxyisovalerate         | -0.32                  | 4.19                | -0.26                   | 2.53                 | 6.71                    |
| KLKB1       | X_11786                          | 0.32                   | 4.13                | 0.26                    | 2.58                 | 6.71                    |
| ITIH1       | X_14658                          | -0.34                  | 4.77                | -0.22                   | 1.95                 | 6.71                    |
| AFM         | X_05522                          | -0.33                  | 4.33                | -0.25                   | 2.38                 | 6.71                    |
| FCGBP       | X_11429                          | 0.27                   | 3.09                | 0.32                    | 3.62                 | 6.71                    |
| S100A9      | propionylcarnitine               | 0.33                   | 4.54                | 0.24                    | 2.17                 | 6.71                    |
| VASN        | X_12217                          | 0.22                   | 2.23                | 0.35                    | 4.48                 | 6.71                    |
| KLKB1       | X_10483                          | -0.34                  | 4.70                | -0.22                   | 2.01                 | 6.71                    |
| PLG         | one_arachidoyl_GPE               | 0.14                   | 1.01                | 0.40                    | 5.69                 | 6.70                    |
| ORM2        | X_12688                          | 0.23                   | 2.34                | 0.35                    | 4.37                 | 6.70                    |
| SERPIND1    | deoxycarnitine                   | -0.35                  | 4.99                | -0.20                   | 1.71                 | 6.70                    |
| KNG1        | butyrylcarnitine                 | -0.29                  | 3.58                | -0.29                   | 3.12                 | 6.70                    |
| SERPINF1    | X_12749                          | 0.29                   | 3.49                | 0.30                    | 3.21                 | 6.70                    |
| HRG         | X_12794                          | -0.29                  | 3.48                | -0.30                   | 3.22                 | 6.70                    |
| SHBG        | tyrosine                         | 0.40                   | 6.42                | 0.06                    | 0.27                 | 6.70                    |
| SERPIND1    | X_12850                          | -0.32                  | 4.12                | -0.26                   | 2.58                 | 6.70                    |
| TF          | three_cystein_S_yl_acetaminophen | -0.23                  | 2.41                | -0.35                   | 4.28                 | 6.70                    |
| BAI2        | one_arachidoyl_GPE               | -0.28                  | 3.22                | -0.31                   | 3.47                 | 6.69                    |
| VSIG4       | xylonate                         | 0.32                   | 4.11                | 0.26                    | 2.58                 | 6.69                    |
| APOA2       | deoxycarnitine                   | -0.32                  | 4.08                | -0.26                   | 2.61                 | 6.69                    |
| LUM         | X_12510                          | 0.27                   | 3.18                | 0.31                    | 3.51                 | 6.69                    |
| COL3A1      | octadecanedioate                 | 0.35                   | 5.06                | 0.20                    | 1.63                 | 6.69                    |
| ITIH2       | X_12802                          | -0.30                  | 3.74                | -0.28                   | 2.95                 | 6.69                    |
| APOH        | threitol                         | 0.31                   | 3.89                | 0.27                    | 2.80                 | 6.69                    |
| DEFA1       | isobutyrylcarnitine              | 0.28                   | 3.21                | 0.31                    | 3.48                 | 6.69                    |
| LCP1        | one_palmitoyl_GPC                | -0.25                  | 2.63                | -0.34                   | 4.06                 | 6.68                    |
| S100A8      | X_14662                          | 0.18                   | 1.52                | 0.38                    | 5.17                 | 6.68                    |
| SAA1        | X_12802                          | 0.33                   | 4.44                | 0.24                    | 2.24                 | 6.68                    |
| MB          | one_stearoyl_GPC                 | -0.15                  | 1.14                | -0.40                   | 5.54                 | 6.68                    |
| VSIG4       | X_12850                          | 0.24                   | 2.45                | 0.34                    | 4.24                 | 6.68                    |
| COL11A2     | two_palmitoyl_GPC                | 0.20                   | 1.80                | 0.37                    | 4.88                 | 6.68                    |
| APOC3       | X_12101                          | 0.33                   | 4.36                | 0.25                    | 2.32                 | 6.68                    |
| PLEK        | citrulline                       | 0.38                   | 5.75                | 0.14                    | 0.93                 | 6.68                    |
| DEFA1       | glutaroylcarnitine               | 0.29                   | 3.41                | 0.30                    | 3.27                 | 6.68                    |
| ADIPOQ      | X_11423                          | 0.32                   | 4.29                | 0.25                    | 2.38                 | 6.68                    |
| B2M         | two_methylbutyrylcarnitine       | 0.28                   | 3.21                | 0.31                    | 3.47                 | 6.68                    |
| C1QC        | X_12100                          | 0.23                   | 2.41                | 0.35                    | 4.26                 | 6.68                    |

| gene symbol | metabolite                  | t0 Pearson Correlation | t0 NegLog10 p-value | t24 Pearson Correlation | t24 NegLog10 p-value | Sum of NegLog10 p-value |
|-------------|-----------------------------|------------------------|---------------------|-------------------------|----------------------|-------------------------|
| ECM1        | caffeine                    | 0.20                   | 1.92                | 0.37                    | 4.76                 | 6.68                    |
| C1QA        | urea                        | 0.26                   | 2.97                | 0.32                    | 3.70                 | 6.68                    |
| TTR         | citrulline                  | 0.32                   | 4.23                | 0.25                    | 2.45                 | 6.67                    |
| APOA2       | one_linoleoyl_GPC           | 0.27                   | 3.14                | 0.31                    | 3.53                 | 6.67                    |
| DEFA1       | X_13619                     | -0.25                  | 2.63                | -0.34                   | 4.05                 | 6.67                    |
| RNASE1      | hydroxyisovaleroylcarnitine | 0.25                   | 2.63                | 0.34                    | 4.04                 | 6.67                    |
| CD14        | X_04499                     | 0.27                   | 3.12                | 0.31                    | 3.55                 | 6.67                    |
| A1BG        | urea                        | -0.35                  | 4.94                | -0.21                   | 1.73                 | 6.67                    |
| COL1A1      | prolylhydroxyproline        | 0.34                   | 4.73                | 0.22                    | 1.94                 | 6.67                    |
| ORM1        | biliverdin                  | -0.34                  | 4.77                | -0.22                   | 1.89                 | 6.67                    |
| PLG         | one_oleoyl_GPC              | 0.18                   | 1.55                | 0.38                    | 5.11                 | 6.67                    |
| SERPINC1    | two_palmitoyl_GPC           | 0.26                   | 2.79                | 0.33                    | 3.88                 | 6.67                    |
| ACTBL2      | pipecolate                  | 0.33                   | 4.42                | 0.24                    | 2.24                 | 6.67                    |
| RNASE1      | cholesterol                 | 0.39                   | 5.96                | 0.11                    | 0.70                 | 6.66                    |
| LUM         | X_12095                     | 0.32                   | 4.21                | 0.25                    | 2.45                 | 6.66                    |
| SAA1        | N_acetylaniline             | 0.34                   | 4.60                | 0.23                    | 2.06                 | 6.66                    |
| SERPIND1    | X_12688                     | -0.30                  | 3.66                | -0.28                   | 3.01                 | 6.66                    |
| S100A8      | one_linoleoyl_GPC           | -0.21                  | 2.02                | -0.36                   | 4.64                 | 6.66                    |
| ORM1        | X_12688                     | 0.26                   | 2.79                | 0.33                    | 3.87                 | 6.66                    |
| VTN         | X_12101                     | -0.27                  | 3.10                | -0.31                   | 3.56                 | 6.66                    |
| CRP         | threonine                   | -0.27                  | 3.08                | -0.31                   | 3.58                 | 6.66                    |
| AZGP1       | X_12099                     | 0.35                   | 4.91                | 0.21                    | 1.74                 | 6.66                    |
| ITIH2       | urea                        | -0.30                  | 3.78                | -0.28                   | 2.88                 | 6.66                    |
| SAA1        | gamma_glutamylglutamine     | -0.22                  | 2.15                | -0.36                   | 4.51                 | 6.66                    |
| SHBG        | X_12990                     | 0.36                   | 5.30                | 0.18                    | 1.35                 | 6.65                    |
| RBP4        | X_11429                     | 0.15                   | 1.20                | 0.39                    | 5.46                 | 6.65                    |
| SAA3P       | beta_hydroxyisovalerate     | 0.37                   | 5.39                | 0.17                    | 1.26                 | 6.65                    |
| ULK4        | X_10395                     | 0.31                   | 3.85                | 0.27                    | 2.80                 | 6.65                    |
| LCN2        | pelargonate                 | -0.28                  | 3.37                | -0.30                   | 3.29                 | 6.65                    |
| PGLYRP2     | one_palmitoleoyl_GPC        | 0.31                   | 4.01                | 0.26                    | 2.64                 | 6.65                    |
| SERPINF1    | one_methylimidazoleacetate  | 0.28                   | 3.30                | 0.30                    | 3.35                 | 6.65                    |
| COL11A2     | X_06246                     | 0.24                   | 2.51                | 0.34                    | 4.14                 | 6.65                    |
| S100A8      | X_11423                     | 0.34                   | 4.75                | 0.22                    | 1.90                 | 6.65                    |
| VTN         | glutaroylcarnitine          | -0.22                  | 2.14                | -0.36                   | 4.52                 | 6.65                    |
| APOL1       | one_methyladenosine         | -0.34                  | 4.81                | -0.21                   | 1.84                 | 6.65                    |
| AZGP1       | tiglyl_carnitine            | 0.31                   | 3.84                | 0.27                    | 2.81                 | 6.65                    |
| SAA4        | X_12850                     | -0.31                  | 3.99                | -0.27                   | 2.66                 | 6.65                    |
| CFD         | cysteine                    | 0.24                   | 2.50                | 0.34                    | 4.15                 | 6.65                    |
| VSIG4       | X_10266                     | 0.32                   | 4.29                | 0.25                    | 2.36                 | 6.65                    |
| PRDX2       | aspartate                   | 0.09                   | 0.57                | 0.41                    | 6.07                 | 6.65                    |
| SHBG        | X_11273                     | -0.31                  | 3.93                | -0.27                   | 2.72                 | 6.64                    |
| SERPINA3    | two_methylbutyroylcarnitine | 0.34                   | 4.80                | 0.21                    | 1.84                 | 6.64                    |
| ORM2        | biliverdin                  | -0.35                  | 5.07                | -0.19                   | 1.57                 | 6.64                    |
| DEFA1       | X_04498                     | 0.32                   | 4.22                | 0.25                    | 2.42                 | 6.64                    |
| SAA1        | beta_hydroxyisovalerate     | 0.37                   | 5.40                | 0.17                    | 1.24                 | 6.64                    |
| LCN2        | glycocholate                | 0.31                   | 4.05                | 0.26                    | 2.59                 | 6.64                    |
| SERPINF1    | X_12095                     | 0.35                   | 4.85                | 0.21                    | 1.78                 | 6.64                    |
| SERPINA6    | two_methylbutyroylcarnitine | 0.33                   | 4.55                | 0.23                    | 2.09                 | 6.63                    |
| HRG         | octanoylcarnitine           | -0.31                  | 3.88                | -0.27                   | 2.75                 | 6.63                    |
| APOA2       | four_methyl_2_oxopentanoate | 0.30                   | 3.75                | 0.28                    | 2.88                 | 6.63                    |
| TIMP1       | pelargonate                 | -0.26                  | 2.89                | -0.32                   | 3.74                 | 6.63                    |
| LUM         | glycocholate                | 0.30                   | 3.62                | 0.28                    | 3.00                 | 6.63                    |
| AHSG        | X_04495                     | -0.30                  | 3.64                | -0.28                   | 2.99                 | 6.63                    |
| COL1A1      | X_11423                     | 0.38                   | 5.74                | 0.13                    | 0.89                 | 6.63                    |
| S100A9      | X_12458                     | 0.28                   | 3.37                | 0.30                    | 3.25                 | 6.62                    |
| FN1         | histidine                   | 0.25                   | 2.73                | 0.33                    | 3.89                 | 6.62                    |

| gene symbol | metabolite                    | t0 Pearson Correlation | t0 NegLog10 p-value | t24 Pearson Correlation | t24 NegLog10 p-value | Sum of NegLog10 p-value |
|-------------|-------------------------------|------------------------|---------------------|-------------------------|----------------------|-------------------------|
| REG1A       | taurocholate                  | 0.31                   | 3.96                | 0.27                    | 2.66                 | 6.62                    |
| AHSG        | X_11843                       | -0.28                  | 3.26                | -0.30                   | 3.35                 | 6.61                    |
| VTN         | four_acetamidophenol          | 0.34                   | 4.78                | 0.21                    | 1.83                 | 6.61                    |
| MB          | octadecanedioate              | 0.11                   | 0.72                | 0.41                    | 5.89                 | 6.61                    |
| C7          | citrate                       | 0.29                   | 3.45                | 0.29                    | 3.16                 | 6.61                    |
| BAI2        | two_palmitoyl_GPC             | -0.21                  | 2.00                | -0.36                   | 4.62                 | 6.61                    |
| MYO18B      | alanine                       | 0.08                   | 0.50                | 0.42                    | 6.11                 | 6.61                    |
| APOD        | malate                        | 0.29                   | 3.58                | 0.29                    | 3.03                 | 6.61                    |
| S100A9      | X_12611                       | 0.32                   | 4.27                | 0.25                    | 2.34                 | 6.61                    |
| SEPP1       | one_oleoyl_GPC                | 0.35                   | 5.02                | 0.19                    | 1.59                 | 6.61                    |
| AHSG        | X_05522                       | -0.27                  | 3.03                | -0.31                   | 3.58                 | 6.61                    |
| ORM2        | two_methylbutyrylcarnitine    | 0.25                   | 2.76                | 0.33                    | 3.85                 | 6.61                    |
| CFHR2       | choline                       | 0.32                   | 4.22                | 0.25                    | 2.39                 | 6.60                    |
| AZGP1       | X_10439                       | 0.33                   | 4.41                | 0.24                    | 2.19                 | 6.60                    |
| SERPIND1    | X_04498                       | -0.26                  | 2.88                | -0.32                   | 3.73                 | 6.60                    |
| ORM2        | X_06246                       | -0.20                  | 1.84                | -0.37                   | 4.77                 | 6.60                    |
| DEFA1       | X_11423                       | 0.21                   | 2.02                | 0.36                    | 4.59                 | 6.60                    |
| LUM         | X_12101                       | 0.28                   | 3.23                | 0.30                    | 3.37                 | 6.60                    |
| AMBP        | scyllo_inositol               | 0.32                   | 4.12                | 0.26                    | 2.48                 | 6.60                    |
| AZGP1       | X_11421                       | 0.29                   | 3.44                | 0.29                    | 3.16                 | 6.60                    |
| RNASE1      | X_09789                       | 0.26                   | 2.95                | 0.32                    | 3.65                 | 6.60                    |
| SERPIND1    | N_acetylthreonine             | -0.26                  | 2.96                | -0.32                   | 3.64                 | 6.60                    |
| AFM         | octanoylcarnitine             | -0.32                  | 4.29                | -0.24                   | 2.31                 | 6.60                    |
| HBB         | X_14588                       | -0.15                  | 1.16                | -0.39                   | 5.44                 | 6.60                    |
| SERPINF1    | arabinose                     | 0.22                   | 2.23                | 0.35                    | 4.37                 | 6.60                    |
| S100A8      | glutaroylcarnitine            | 0.34                   | 4.77                | 0.21                    | 1.83                 | 6.60                    |
| ABCA13      | one_stearoyl_GPC              | 0.25                   | 2.76                | 0.33                    | 3.83                 | 6.60                    |
| S100A9      | X_05522                       | 0.34                   | 4.71                | 0.22                    | 1.89                 | 6.60                    |
| SPINK1      | arabitol                      | 0.33                   | 4.52                | 0.23                    | 2.08                 | 6.59                    |
| FCGBP       | mannose                       | 0.10                   | 0.65                | 0.41                    | 5.94                 | 6.59                    |
| LUM         | arabinose                     | 0.27                   | 3.18                | 0.31                    | 3.42                 | 6.59                    |
| TIMP1       | taurocholate                  | 0.30                   | 3.71                | 0.28                    | 2.88                 | 6.59                    |
| LGALS3BP    | X_12510                       | 0.27                   | 3.05                | 0.31                    | 3.54                 | 6.59                    |
| ECM1        | X_04357                       | 0.34                   | 4.60                | 0.22                    | 1.99                 | 6.59                    |
| CFD         | choline                       | 0.29                   | 3.48                | 0.29                    | 3.11                 | 6.59                    |
| CD14        | X_13619                       | -0.19                  | 1.66                | -0.37                   | 4.93                 | 6.59                    |
| FGA         | seven_HOCA                    | -0.27                  | 3.00                | -0.31                   | 3.59                 | 6.59                    |
| GPX3        | prolylhydroxyproline          | -0.30                  | 3.65                | -0.28                   | 2.94                 | 6.59                    |
| PON1        | four_acetamidobutanoate       | -0.22                  | 2.18                | -0.35                   | 4.41                 | 6.59                    |
| CFD         | carnitine                     | -0.28                  | 3.34                | -0.30                   | 3.24                 | 6.59                    |
| CST3        | one_arachidoyl_GPE            | -0.32                  | 4.16                | -0.25                   | 2.43                 | 6.58                    |
| APOH        | X_12644                       | 0.17                   | 1.39                | 0.38                    | 5.19                 | 6.58                    |
| PLG         | X_04595                       | -0.25                  | 2.73                | -0.33                   | 3.85                 | 6.58                    |
| TTR         | glycerol_3_phosphate          | 0.28                   | 3.38                | 0.29                    | 3.19                 | 6.58                    |
| CD14        | HPLA                          | 0.25                   | 2.72                | 0.33                    | 3.85                 | 6.58                    |
| SPINK1      | X_12101                       | 0.29                   | 3.55                | 0.29                    | 3.03                 | 6.58                    |
| APOA1       | one_arachidoyl_GPE            | 0.19                   | 1.67                | 0.37                    | 4.90                 | 6.58                    |
| ITI2        | octanoylcarnitine             | -0.21                  | 2.06                | -0.36                   | 4.51                 | 6.57                    |
| COL1A1      | N6_carbamoylthreonyladenosine | 0.36                   | 5.22                | 0.18                    | 1.36                 | 6.57                    |
| PTGDS       | isobutyrylcarnitine           | 0.30                   | 3.69                | 0.28                    | 2.89                 | 6.57                    |
| SAA3P       | phenylalanine                 | 0.37                   | 5.59                | 0.14                    | 0.98                 | 6.57                    |
| LCP1        | X_10395                       | -0.38                  | 5.68                | -0.13                   | 0.89                 | 6.57                    |
| DEFA1       | X_11334                       | 0.22                   | 2.24                | 0.35                    | 4.33                 | 6.57                    |
| VTN         | X_11491                       | -0.29                  | 3.46                | -0.29                   | 3.11                 | 6.57                    |
| SERPINF1    | X_11423                       | 0.24                   | 2.47                | 0.34                    | 4.10                 | 6.57                    |
| BAI2        | one_palmitoleoyl_GPC          | -0.25                  | 2.74                | -0.33                   | 3.83                 | 6.57                    |

| gene symbol | metabolite                        | t0 Pearson Correlation | t0 NegLog10 p-value | t24 Pearson Correlation | t24 NegLog10 p-value | Sum of NegLog10 p-value |
|-------------|-----------------------------------|------------------------|---------------------|-------------------------|----------------------|-------------------------|
| APOD        | one_palmitoylglycerol             | 0.33                   | 4.48                | 0.23                    | 2.09                 | 6.57                    |
| SAA3P       | X_06268                           | -0.14                  | 1.07                | -0.39                   | 5.50                 | 6.57                    |
| CLU         | X_11538                           | -0.10                  | 0.67                | -0.41                   | 5.90                 | 6.57                    |
| LBP         | gamma_glutamylphenylalanine       | 0.30                   | 3.61                | 0.28                    | 2.96                 | 6.57                    |
| APOC1       | one_stearoyl_GPC                  | 0.26                   | 2.86                | 0.32                    | 3.71                 | 6.57                    |
| FCGBP       | hexadecanedioate                  | 0.30                   | 3.69                | 0.28                    | 2.88                 | 6.56                    |
| S100A9      | phenylacetylglutamine             | 0.26                   | 2.95                | 0.32                    | 3.61                 | 6.56                    |
| LUM         | pseudouridine                     | 0.28                   | 3.26                | 0.30                    | 3.31                 | 6.56                    |
| C7          | X_13553                           | 0.35                   | 4.90                | 0.20                    | 1.67                 | 6.56                    |
| HRG         | alpha_ketobutyrate                | -0.19                  | 1.64                | -0.37                   | 4.92                 | 6.56                    |
| PLG         | X_12855                           | -0.19                  | 1.73                | -0.37                   | 4.84                 | 6.56                    |
| COL1A1      | X_10510                           | -0.08                  | 0.51                | -0.41                   | 6.05                 | 6.56                    |
| LRG1        | X_11786                           | -0.28                  | 3.26                | -0.30                   | 3.30                 | 6.56                    |
| C1QB        | N_acetylthreonine                 | 0.36                   | 5.10                | 0.18                    | 1.46                 | 6.56                    |
| LYZ         | alpha_ketobutyrate                | -0.27                  | 3.08                | -0.31                   | 3.48                 | 6.56                    |
| SEPP1       | one_linoleoyl_GPC                 | 0.36                   | 5.35                | 0.16                    | 1.21                 | 6.56                    |
| CST3        | taurochenodeoxycholate            | 0.39                   | 5.95                | 0.10                    | 0.61                 | 6.56                    |
| C4BPA       | palmitoleate                      | -0.28                  | 3.20                | -0.30                   | 3.36                 | 6.56                    |
| DEFA1       | X_12688                           | 0.25                   | 2.64                | 0.33                    | 3.92                 | 6.55                    |
| C1QB        | X_05907                           | -0.34                  | 4.75                | -0.21                   | 1.81                 | 6.55                    |
| C1QA        | one_palmitoyl_GPC                 | -0.34                  | 4.76                | -0.21                   | 1.79                 | 6.55                    |
| CRP         | X_12794                           | 0.30                   | 3.82                | 0.27                    | 2.74                 | 6.55                    |
| AMBP        | deoxycarnitine                    | 0.33                   | 4.34                | 0.24                    | 2.21                 | 6.55                    |
| GPX3        | xanthine                          | 0.32                   | 4.16                | 0.25                    | 2.39                 | 6.55                    |
| KNG1        | X_08402                           | 0.27                   | 3.03                | 0.31                    | 3.53                 | 6.55                    |
| BAI2        | one_linoleoyl_GPC                 | -0.17                  | 1.47                | -0.38                   | 5.08                 | 6.55                    |
| ACTA2       | bilirubin                         | 0.05                   | 0.25                | 0.42                    | 6.30                 | 6.55                    |
| SERPINA1    | three_cysteine_S_yl_acetaminophen | 0.33                   | 4.47                | 0.23                    | 2.08                 | 6.55                    |
| APOC3       | N2_N2_dimethylguanosine           | 0.26                   | 2.85                | 0.32                    | 3.70                 | 6.55                    |
| ADIPOQ      | hippurate                         | 0.34                   | 4.70                | 0.21                    | 1.85                 | 6.55                    |
| AFM         | X_11244                           | -0.22                  | 2.13                | -0.35                   | 4.42                 | 6.55                    |
| CD5L        | gamma_glutamyltyrosine            | 0.36                   | 5.20                | 0.18                    | 1.34                 | 6.54                    |
| FCGBP       | N6_carbamoylthreonyladenosine     | 0.20                   | 1.80                | 0.37                    | 4.74                 | 6.54                    |
| SERPINA1    | beta_hydroxyisovalerate           | 0.34                   | 4.64                | 0.22                    | 1.90                 | 6.54                    |
| APOC3       | CMPF                              | 0.29                   | 3.45                | 0.29                    | 3.09                 | 6.54                    |
| IGFBP4      | X_12855                           | 0.38                   | 5.89                | 0.11                    | 0.65                 | 6.54                    |
| S100A8      | X_10266                           | 0.27                   | 3.14                | 0.30                    | 3.40                 | 6.54                    |
| SAA3P       | gulono_1_4_lactone                | 0.31                   | 4.06                | 0.25                    | 2.48                 | 6.54                    |
| SERPIND1    | X_12458                           | -0.25                  | 2.66                | -0.33                   | 3.88                 | 6.53                    |
| FABP1       | X_11538                           | 0.08                   | 0.44                | 0.42                    | 6.09                 | 6.53                    |
| APOA2       | X_03056                           | -0.30                  | 3.76                | -0.27                   | 2.77                 | 6.53                    |
| HRG         | tryptophan                        | 0.33                   | 4.53                | 0.22                    | 2.00                 | 6.53                    |
| ABCA13      | X_11786                           | 0.28                   | 3.33                | 0.29                    | 3.20                 | 6.53                    |
| SAA1        | X_04495                           | 0.36                   | 5.25                | 0.17                    | 1.28                 | 6.53                    |
| RNASE1      | acetylcarnitine                   | 0.20                   | 1.82                | 0.36                    | 4.71                 | 6.53                    |
| SERPINC1    | hexadecanedioate                  | -0.21                  | 2.05                | -0.35                   | 4.47                 | 6.52                    |
| APOA4       | erythronate                       | 0.32                   | 4.07                | 0.25                    | 2.45                 | 6.52                    |
| FBLN1       | X_05522                           | 0.26                   | 2.83                | 0.32                    | 3.69                 | 6.52                    |
| APOH        | pipecolate                        | -0.27                  | 3.16                | -0.30                   | 3.35                 | 6.52                    |
| ECM1        | taurocholate                      | 0.26                   | 2.82                | 0.32                    | 3.70                 | 6.52                    |
| PLG         | X_11521                           | -0.18                  | 1.57                | -0.37                   | 4.94                 | 6.52                    |
| CFHR2       | myo_inositol                      | 0.28                   | 3.22                | 0.30                    | 3.30                 | 6.52                    |
| CD14        | X_11838                           | 0.27                   | 3.05                | 0.31                    | 3.46                 | 6.51                    |
| KLKB1       | one_stearoyl_GPC                  | 0.34                   | 4.60                | 0.22                    | 1.92                 | 6.51                    |
| SAA3P       | X_12644                           | -0.33                  | 4.35                | -0.24                   | 2.16                 | 6.51                    |
| C1QB        | X_10483                           | 0.39                   | 5.99                | 0.09                    | 0.52                 | 6.51                    |

| gene symbol | metabolite                      | t0 Pearson Correlation | t0 NegLog10 p-value | t24 Pearson Correlation | t24 NegLog10 p-value | Sum of NegLog10 p-value |
|-------------|---------------------------------|------------------------|---------------------|-------------------------|----------------------|-------------------------|
| APOA2       | X_12458                         | -0.33                  | 4.40                | -0.23                   | 2.12                 | 6.51                    |
| AFM         | threonine                       | 0.24                   | 2.60                | 0.33                    | 3.92                 | 6.51                    |
| C1QA        | gamma_glutamyltyrosine          | 0.32                   | 4.24                | 0.24                    | 2.27                 | 6.51                    |
| TF          | hexanoylcarnitine               | -0.31                  | 4.04                | -0.25                   | 2.47                 | 6.51                    |
| ITIH1       | phenylalanine                   | -0.34                  | 4.67                | -0.21                   | 1.84                 | 6.51                    |
| SAA1        | four_acetamidophenol            | 0.24                   | 2.54                | 0.33                    | 3.97                 | 6.51                    |
| IGFBP4      | tiglyl_carnitine                | 0.30                   | 3.67                | 0.28                    | 2.83                 | 6.51                    |
| HPR         | taurochenodeoxycholate          | -0.25                  | 2.71                | -0.32                   | 3.79                 | 6.50                    |
| SAA1        | X_04629                         | 0.33                   | 4.53                | 0.22                    | 1.98                 | 6.50                    |
| ORM2        | creatinine                      | 0.24                   | 2.44                | 0.34                    | 4.07                 | 6.50                    |
| S100A8      | propionylcarnitine              | 0.32                   | 4.13                | 0.25                    | 2.37                 | 6.50                    |
| DEFA1       | X_12611                         | 0.19                   | 1.76                | 0.36                    | 4.74                 | 6.50                    |
| PTGDS       | scyllo_inositol                 | 0.27                   | 3.12                | 0.30                    | 3.38                 | 6.50                    |
| ECM1        | gamma_glutamyltyrosine          | 0.27                   | 3.02                | 0.31                    | 3.48                 | 6.50                    |
| IGFBP4      | X_04595                         | 0.32                   | 4.14                | 0.25                    | 2.36                 | 6.50                    |
| LGALS3BP    | X_11538                         | 0.26                   | 2.87                | 0.32                    | 3.63                 | 6.50                    |
| AHSG        | X_12465                         | -0.27                  | 3.05                | -0.31                   | 3.44                 | 6.50                    |
| GPX3        | quinic acid                     | -0.26                  | 2.88                | -0.32                   | 3.62                 | 6.50                    |
| SHBG        | X_12099                         | -0.31                  | 4.00                | -0.26                   | 2.50                 | 6.49                    |
| APOC3       | pseudouridine                   | 0.27                   | 3.02                | 0.31                    | 3.48                 | 6.49                    |
| PGLYRP2     | one_arachidoyl_GPE              | 0.34                   | 4.64                | 0.21                    | 1.85                 | 6.49                    |
| VSIG4       | phenylalanine                   | 0.29                   | 3.46                | 0.29                    | 3.03                 | 6.49                    |
| C1QA        | X_12855                         | 0.27                   | 3.04                | 0.31                    | 3.44                 | 6.49                    |
| VASN        | malate                          | 0.11                   | 0.75                | 0.40                    | 5.74                 | 6.49                    |
| ORM2        | xylonate                        | 0.28                   | 3.24                | 0.30                    | 3.25                 | 6.49                    |
| VWF         | biliverdin                      | 0.28                   | 3.24                | 0.30                    | 3.25                 | 6.49                    |
| MB          | butyrylcarnitine                | 0.31                   | 4.00                | 0.26                    | 2.49                 | 6.49                    |
| C1RL        | X_10395                         | -0.40                  | 6.47                | 0.00                    | 0.01                 | 6.49                    |
| LCN2        | threitol                        | 0.29                   | 3.52                | 0.28                    | 2.96                 | 6.48                    |
| CES1        | X_14658                         | 0.18                   | 1.59                | 0.37                    | 4.89                 | 6.48                    |
| SERPINA3    | X_11440                         | 0.24                   | 2.51                | 0.33                    | 3.97                 | 6.48                    |
| GSN         | X_10395                         | 0.26                   | 2.82                | 0.32                    | 3.66                 | 6.48                    |
| DEFA1       | hydroxyisovalerylcarnitine      | 0.16                   | 1.36                | 0.38                    | 5.13                 | 6.48                    |
| VASN        | prolylhydroxyproline            | 0.28                   | 3.32                | 0.29                    | 3.16                 | 6.48                    |
| CFD         | X_11510                         | 0.23                   | 2.30                | 0.34                    | 4.18                 | 6.48                    |
| FCGBP       | X_11786                         | -0.10                  | 0.61                | -0.41                   | 5.87                 | 6.48                    |
| ORM1        | hexanoylcarnitine               | 0.27                   | 3.18                | 0.30                    | 3.30                 | 6.48                    |
| COL1A1      | X_05426                         | 0.36                   | 5.28                | 0.16                    | 1.20                 | 6.48                    |
| LUM         | lysine                          | 0.25                   | 2.66                | 0.33                    | 3.82                 | 6.48                    |
| APOC3       | glutaroylcarnitine              | 0.28                   | 3.19                | 0.30                    | 3.29                 | 6.48                    |
| S100A8      | one_arachidoyl_GPE              | -0.24                  | 2.56                | -0.33                   | 3.91                 | 6.47                    |
| PON1        | X_12688                         | -0.23                  | 2.27                | -0.34                   | 4.20                 | 6.47                    |
| LRG1        | X_03056                         | 0.33                   | 4.45                | 0.23                    | 2.03                 | 6.47                    |
| COPB1       | X_12786                         | 0.17                   | 1.39                | 0.38                    | 5.09                 | 6.47                    |
| LYZ         | one_five_anhydroglucitol        | -0.39                  | 5.96                | -0.09                   | 0.52                 | 6.47                    |
| CRP         | three_hydroxy_2_ethylpropionate | 0.36                   | 5.30                | 0.16                    | 1.17                 | 6.47                    |
| TF          | X_05522                         | -0.30                  | 3.76                | -0.27                   | 2.71                 | 6.47                    |
| SAA3P       | epiandrosterone_sulfate         | 0.28                   | 3.32                | 0.29                    | 3.14                 | 6.47                    |
| FN1         | piperine                        | 0.34                   | 4.64                | 0.21                    | 1.83                 | 6.47                    |
| HPR         | glycochenodeoxycholate          | -0.23                  | 2.27                | -0.34                   | 4.20                 | 6.47                    |
| ITIH2       | three_hydroxy_2_ethylpropionate | -0.32                  | 4.22                | -0.24                   | 2.25                 | 6.47                    |
| MB          | one_eicosatrienoyl_GPC          | -0.21                  | 2.00                | -0.35                   | 4.46                 | 6.46                    |
| SERPINA3    | one_methyladenosine             | 0.23                   | 2.34                | 0.34                    | 4.13                 | 6.46                    |
| LRG1        | X_03094                         | -0.31                  | 3.87                | -0.26                   | 2.60                 | 6.46                    |
| C1QC        | X_11510                         | 0.20                   | 1.79                | 0.36                    | 4.68                 | 6.46                    |
| SAA3P       | N_acetylneuraminate             | 0.36                   | 5.12                | 0.18                    | 1.34                 | 6.46                    |

| gene symbol | metabolite                       | t0 Pearson Correlation | t0 NegLog10 p-value | t24 Pearson Correlation | t24 NegLog10 p-value | Sum of NegLog10 p-value |
|-------------|----------------------------------|------------------------|---------------------|-------------------------|----------------------|-------------------------|
| C1QC        | four_methyl_2_oxopentanoate      | -0.32                  | 4.23                | -0.24                   | 2.24                 | 6.46                    |
| SEPP1       | two_palmitoyl_GPC                | 0.35                   | 5.01                | 0.18                    | 1.45                 | 6.46                    |
| ORM2        | X_11315                          | -0.20                  | 1.87                | -0.36                   | 4.59                 | 6.46                    |
| PTGDS       | gamma_glutamylleucine            | 0.25                   | 2.77                | 0.32                    | 3.68                 | 6.46                    |
| CES1        | threonine                        | 0.19                   | 1.76                | 0.36                    | 4.70                 | 6.46                    |
| LCP1        | X_14588                          | 0.25                   | 2.63                | 0.33                    | 3.82                 | 6.46                    |
| SERPINF1    | one_five_anhydroglucitol         | -0.18                  | 1.59                | -0.37                   | 4.86                 | 6.45                    |
| S100A8      | arabinose                        | 0.35                   | 4.85                | 0.20                    | 1.60                 | 6.45                    |
| ITIH2       | dihomolinolenate                 | 0.34                   | 4.78                | 0.20                    | 1.67                 | 6.45                    |
| IGFBP4      | X_12802                          | 0.35                   | 4.94                | 0.19                    | 1.51                 | 6.45                    |
| AFP         | X_04357                          | 0.34                   | 4.61                | 0.21                    | 1.84                 | 6.45                    |
| HRG         | one_linoleoyl_GPC                | 0.25                   | 2.61                | 0.33                    | 3.84                 | 6.45                    |
| AHSG        | prolylhydroxyproline             | -0.28                  | 3.37                | -0.29                   | 3.08                 | 6.45                    |
| BAI2        | one_arachidoyl_GPC               | -0.20                  | 1.80                | -0.36                   | 4.65                 | 6.45                    |
| SEPP1       | one_arachidoyl_GPC               | 0.34                   | 4.79                | 0.20                    | 1.65                 | 6.45                    |
| SERPINA1    | citrulline                       | -0.32                  | 4.24                | -0.24                   | 2.21                 | 6.45                    |
| VSIG4       | hexadecanedioate                 | 0.21                   | 2.03                | 0.35                    | 4.42                 | 6.44                    |
| FGG         | malate                           | -0.24                  | 2.48                | -0.33                   | 3.96                 | 6.44                    |
| LGALS3BP    | myristoleate                     | 0.31                   | 4.02                | 0.25                    | 2.41                 | 6.44                    |
| PON1        | X_11429                          | -0.27                  | 3.01                | -0.31                   | 3.43                 | 6.44                    |
| AFM         | X_11245                          | -0.31                  | 3.84                | -0.26                   | 2.60                 | 6.43                    |
| C1QB        | X_12101                          | 0.33                   | 4.33                | 0.23                    | 2.10                 | 6.43                    |
| PLG         | N_acetylthreonine                | -0.20                  | 1.84                | -0.36                   | 4.59                 | 6.43                    |
| SAA3P       | one_oleoyl_GPE                   | -0.29                  | 3.43                | -0.28                   | 3.01                 | 6.43                    |
| VSIG4       | heptanoate                       | -0.29                  | 3.56                | -0.28                   | 2.88                 | 6.43                    |
| C1QC        | N_acetylalanine                  | 0.28                   | 3.34                | 0.29                    | 3.10                 | 6.43                    |
| FBLN1       | pyridoxate                       | 0.27                   | 3.00                | 0.31                    | 3.43                 | 6.43                    |
| VASN        | myo_inositol                     | 0.30                   | 3.64                | 0.27                    | 2.79                 | 6.43                    |
| A1BG        | X_11429                          | -0.32                  | 4.28                | -0.23                   | 2.15                 | 6.43                    |
| CFHR2       | pantothenate                     | 0.22                   | 2.10                | 0.35                    | 4.32                 | 6.42                    |
| SAA3P       | p_acetamidophenylglucuronide     | 0.19                   | 1.71                | 0.36                    | 4.71                 | 6.42                    |
| CFD         | N_acetylneuraminate              | 0.18                   | 1.60                | 0.37                    | 4.83                 | 6.42                    |
| SPINK1      | X_12104                          | 0.20                   | 1.91                | 0.36                    | 4.51                 | 6.42                    |
| VWF         | X_11491                          | 0.25                   | 2.64                | 0.32                    | 3.78                 | 6.42                    |
| C8A         | malate                           | -0.05                  | 0.26                | -0.42                   | 6.17                 | 6.42                    |
| BAI2        | beta_hydroxyisovalerate          | 0.37                   | 5.42                | 0.14                    | 1.00                 | 6.42                    |
| APOA2       | X_13553                          | -0.34                  | 4.70                | -0.20                   | 1.72                 | 6.42                    |
| HPX         | X_11490                          | -0.29                  | 3.47                | -0.28                   | 2.94                 | 6.42                    |
| LYZ         | X_11452                          | 0.29                   | 3.57                | 0.28                    | 2.85                 | 6.42                    |
| LUM         | X_10266                          | 0.31                   | 3.85                | 0.26                    | 2.57                 | 6.42                    |
| F12         | beta_hydroxyisovalerate          | -0.36                  | 5.08                | -0.17                   | 1.33                 | 6.42                    |
| AFM         | one_arachidoyl_GPC               | 0.29                   | 3.40                | 0.28                    | 3.01                 | 6.41                    |
| APOC3       | X_12749                          | 0.25                   | 2.67                | 0.32                    | 3.74                 | 6.41                    |
| SAA1        | N_acetylthreonine                | 0.39                   | 6.23                | 0.04                    | 0.18                 | 6.41                    |
| ORM1        | X_11244                          | 0.26                   | 2.82                | 0.31                    | 3.59                 | 6.41                    |
| DEFA1       | X_10266                          | 0.14                   | 1.01                | 0.39                    | 5.40                 | 6.41                    |
| CFI         | X_12688                          | -0.28                  | 3.38                | -0.29                   | 3.03                 | 6.41                    |
| LBP         | tiglyl_carnitine                 | 0.31                   | 3.84                | 0.26                    | 2.57                 | 6.41                    |
| CP          | palmitoylcarnitine               | 0.32                   | 4.16                | 0.24                    | 2.24                 | 6.41                    |
| CD14        | X_12101                          | 0.19                   | 1.70                | 0.36                    | 4.71                 | 6.41                    |
| PON1        | X_12101                          | -0.27                  | 3.11                | -0.30                   | 3.29                 | 6.40                    |
| REG1A       | X_11437                          | 0.27                   | 3.18                | 0.30                    | 3.22                 | 6.40                    |
| SERPINA1    | citrate                          | -0.31                  | 3.96                | -0.25                   | 2.44                 | 6.40                    |
| FGG         | seven_HOCA                       | -0.26                  | 2.93                | -0.31                   | 3.48                 | 6.40                    |
| SERPINA3    | three_cystein_S_yl_acetaminophen | 0.33                   | 4.35                | 0.23                    | 2.05                 | 6.40                    |
| REG1A       | malate                           | 0.28                   | 3.24                | 0.29                    | 3.16                 | 6.40                    |

| gene symbol | metabolite                   | t0 Pearson Correlation | t0 NegLog10 p-value | t24 Pearson Correlation | t24 NegLog10 p-value | Sum of NegLog10 p-value |
|-------------|------------------------------|------------------------|---------------------|-------------------------|----------------------|-------------------------|
| SERPINF1    | glutaroylcarnitine           | 0.23                   | 2.39                | 0.33                    | 4.01                 | 6.40                    |
| KNG1        | one_eicosatrienoyl_GPC       | 0.27                   | 3.00                | 0.30                    | 3.40                 | 6.40                    |
| ADIPOQ      | catechol_sulfate             | 0.30                   | 3.78                | 0.26                    | 2.62                 | 6.40                    |
| PON1        | X_03951                      | -0.22                  | 2.19                | -0.34                   | 4.21                 | 6.40                    |
| FCGBP       | tauroolithocholate_3_sulfate | 0.30                   | 3.83                | 0.26                    | 2.57                 | 6.40                    |
| PON1        | N2_N2_dimethylguanosine      | -0.26                  | 2.82                | -0.31                   | 3.58                 | 6.40                    |
| VSIG4       | methionine                   | 0.15                   | 1.21                | 0.38                    | 5.18                 | 6.39                    |
| FABP1       | lactate                      | 0.36                   | 5.11                | 0.17                    | 1.29                 | 6.39                    |
| LCP1        | one_stearoyl_GPC             | -0.21                  | 1.98                | -0.35                   | 4.41                 | 6.39                    |
| ORM2        | X_11437                      | 0.19                   | 1.77                | 0.36                    | 4.62                 | 6.39                    |
| LCN2        | cysteine                     | 0.28                   | 3.31                | 0.29                    | 3.08                 | 6.39                    |
| LCP1        | one_arachidoyl_GPC           | -0.24                  | 2.57                | -0.33                   | 3.82                 | 6.39                    |
| VSIG4       | taurochenodeoxycholate       | 0.13                   | 1.00                | 0.39                    | 5.39                 | 6.39                    |
| ICAM2       | threonine                    | 0.32                   | 4.19                | 0.24                    | 2.20                 | 6.39                    |
| A1BG        | X_12611                      | -0.32                  | 4.22                | -0.24                   | 2.16                 | 6.38                    |
| ADIPOQ      | X_04504                      | 0.32                   | 4.22                | 0.24                    | 2.16                 | 6.38                    |
| SERPIND1    | betaine                      | -0.31                  | 4.00                | -0.25                   | 2.38                 | 6.38                    |
| TF          | three_methyl_2_oxovalerate   | 0.23                   | 2.30                | 0.34                    | 4.08                 | 6.38                    |
| FGB         | malate                       | -0.27                  | 3.02                | -0.30                   | 3.36                 | 6.38                    |
| SERPINA3    | octanoylcarnitine            | 0.27                   | 3.12                | 0.30                    | 3.26                 | 6.38                    |
| C4BPA       | five_dodecenoate             | -0.28                  | 3.38                | -0.28                   | 3.00                 | 6.38                    |
| ADIPOQ      | X_02249                      | 0.35                   | 4.97                | 0.18                    | 1.40                 | 6.38                    |
| VSIG4       | phenol_sulfate               | 0.27                   | 3.15                | 0.30                    | 3.22                 | 6.38                    |
| RBP4        | X_08402                      | 0.31                   | 4.02                | 0.25                    | 2.35                 | 6.38                    |
| LGALS3BP    | gamma_glutamyltyrosine       | 0.31                   | 3.90                | 0.25                    | 2.48                 | 6.38                    |
| LRG1        | X_12794                      | 0.33                   | 4.53                | 0.21                    | 1.84                 | 6.37                    |
| FCGBP       | X_13429                      | 0.15                   | 1.22                | 0.38                    | 5.15                 | 6.37                    |
| TF          | X_11795                      | 0.17                   | 1.40                | 0.37                    | 4.98                 | 6.37                    |
| CD14        | X_11593                      | 0.23                   | 2.32                | 0.34                    | 4.05                 | 6.37                    |
| LCP1        | one_arachidoyl_GPE           | -0.22                  | 2.16                | -0.34                   | 4.21                 | 6.37                    |
| PLG         | two_methylbutyrylcarnitine   | -0.22                  | 2.14                | -0.34                   | 4.22                 | 6.36                    |
| FCGBP       | four_acetaminophen_sulfate   | 0.02                   | 0.10                | 0.42                    | 6.27                 | 6.36                    |
| ORM2        | proline                      | -0.32                  | 4.30                | -0.23                   | 2.07                 | 6.36                    |
| LYZ         | pantothenate                 | 0.37                   | 5.45                | 0.14                    | 0.91                 | 6.36                    |
| PLG         | X_04498                      | -0.19                  | 1.64                | -0.36                   | 4.72                 | 6.36                    |
| AZGP1       | X_09789                      | 0.29                   | 3.56                | 0.27                    | 2.80                 | 6.36                    |
| COL11A2     | octanoylcarnitine            | -0.30                  | 3.80                | -0.26                   | 2.56                 | 6.36                    |
| RNASE1      | decanoylcarnitine            | 0.23                   | 2.35                | 0.33                    | 4.01                 | 6.35                    |
| APOA2       | one_arachidoyl_GPC           | 0.23                   | 2.40                | 0.33                    | 3.95                 | 6.35                    |
| SERPINC1    | one_eicosatrienoyl_GPC       | 0.23                   | 2.28                | 0.34                    | 4.07                 | 6.35                    |
| RBMX        | one_palmitoyl_GPC            | -0.05                  | 0.24                | -0.42                   | 6.11                 | 6.35                    |
| ITIH3       | X_12775                      | 0.24                   | 2.59                | 0.32                    | 3.76                 | 6.35                    |
| PON1        | one_methyladenosine          | -0.33                  | 4.38                | -0.22                   | 1.98                 | 6.35                    |
| CRP         | X_12092                      | 0.26                   | 2.82                | 0.31                    | 3.53                 | 6.35                    |
| SAA1        | X_10483                      | 0.35                   | 4.84                | 0.19                    | 1.51                 | 6.35                    |
| TIMP1       | one_methyladenosine          | 0.26                   | 2.83                | 0.31                    | 3.51                 | 6.35                    |
| SAA3P       | phenylacetylglutamine        | 0.30                   | 3.79                | 0.26                    | 2.55                 | 6.35                    |
| C7          | myristoleate                 | 0.31                   | 3.98                | 0.25                    | 2.37                 | 6.35                    |
| A1BG        | N_acetylthreonine            | -0.30                  | 3.62                | -0.27                   | 2.72                 | 6.34                    |
| ADIPOQ      | X_12206                      | 0.35                   | 5.06                | 0.17                    | 1.28                 | 6.34                    |
| SERPINA1    | X_03056                      | 0.31                   | 3.89                | 0.25                    | 2.46                 | 6.34                    |
| APOL1       | X_10483                      | -0.37                  | 5.50                | -0.13                   | 0.85                 | 6.34                    |
| TF          | X_12104                      | -0.16                  | 1.28                | -0.38                   | 5.06                 | 6.34                    |
| RNASE1      | X_11470                      | 0.24                   | 2.45                | 0.33                    | 3.89                 | 6.34                    |
| CAT         | hexadecanedioate             | 0.18                   | 1.58                | 0.37                    | 4.76                 | 6.34                    |
| SHBG        | seven_HOCA                   | 0.37                   | 5.42                | 0.14                    | 0.92                 | 6.34                    |

| gene symbol | metabolite                      | t0 Pearson Correlation | t0 NegLog10 p-value | t24 Pearson Correlation | t24 NegLog10 p-value | Sum of NegLog10 p-value |
|-------------|---------------------------------|------------------------|---------------------|-------------------------|----------------------|-------------------------|
| CD14        | X_11334                         | 0.20                   | 1.85                | 0.35                    | 4.49                 | 6.34                    |
| AFM         | hexanoylcarnitine               | -0.35                  | 4.88                | -0.18                   | 1.46                 | 6.34                    |
| SAA4        | X_10744                         | 0.26                   | 2.92                | 0.31                    | 3.42                 | 6.33                    |
| B2M         | one_arachidoyl_GPC              | -0.21                  | 1.97                | -0.35                   | 4.36                 | 6.33                    |
| ECM1        | X_12442                         | 0.35                   | 5.02                | 0.17                    | 1.31                 | 6.33                    |
| CES1        | aspartate                       | 0.18                   | 1.56                | 0.37                    | 4.77                 | 6.33                    |
| APOE        | X_10510                         | 0.32                   | 4.11                | 0.24                    | 2.22                 | 6.33                    |
| A1BG        | X_05522                         | -0.35                  | 4.82                | -0.19                   | 1.51                 | 6.33                    |
| ULK4        | X_11538                         | -0.32                  | 4.24                | -0.23                   | 2.09                 | 6.33                    |
| C1QA        | tiglyl_carnitine                | 0.28                   | 3.32                | 0.28                    | 3.01                 | 6.33                    |
| VASN        | X_12794                         | 0.31                   | 3.96                | 0.25                    | 2.37                 | 6.33                    |
| ORM1        | three_hydroxy_2_ethylpropionate | 0.35                   | 4.94                | 0.18                    | 1.39                 | 6.33                    |
| AZGP1       | glutamylvaline                  | 0.36                   | 5.24                | 0.15                    | 1.09                 | 6.33                    |
| RNASE1      | three_hydroxy_2_ethylpropionate | 0.29                   | 3.56                | 0.27                    | 2.77                 | 6.33                    |
| FN1         | glutamine                       | 0.22                   | 2.11                | 0.34                    | 4.22                 | 6.33                    |
| LBP         | citrulline                      | -0.34                  | 4.79                | -0.19                   | 1.53                 | 6.33                    |
| MB          | X_12786                         | 0.23                   | 2.32                | 0.33                    | 4.00                 | 6.33                    |
| LUM         | erythritol                      | 0.27                   | 2.99                | 0.30                    | 3.33                 | 6.33                    |
| LRG1        | palmitoylcarnitine              | -0.34                  | 4.59                | -0.21                   | 1.73                 | 6.32                    |
| F12         | glutamate                       | 0.25                   | 2.74                | 0.31                    | 3.58                 | 6.32                    |
| CST3        | p_acetamidophenylglucuronide    | 0.18                   | 1.53                | 0.37                    | 4.80                 | 6.32                    |
| C4BPA       | X_01327                         | -0.27                  | 3.07                | -0.30                   | 3.25                 | 6.32                    |
| VASN        | four_methyl_2_oxopentanoate     | -0.33                  | 4.42                | -0.22                   | 1.89                 | 6.32                    |
| IGFBP4      | kynurenine                      | 0.15                   | 1.21                | 0.38                    | 5.11                 | 6.32                    |
| S100A9      | X_14662                         | 0.26                   | 2.81                | 0.31                    | 3.50                 | 6.31                    |
| AFM         | X_04495                         | -0.35                  | 5.06                | -0.17                   | 1.25                 | 6.31                    |
| PON1        | one_stearoyl_GPC                | 0.27                   | 3.06                | 0.30                    | 3.25                 | 6.31                    |
| ADIPOQ      | X_12749                         | 0.35                   | 5.00                | 0.17                    | 1.31                 | 6.31                    |
| CFI         | taurochenodeoxycholate          | -0.37                  | 5.39                | -0.14                   | 0.92                 | 6.31                    |
| B2M         | three_methyl_2_oxobutyrate      | -0.31                  | 4.01                | -0.24                   | 2.29                 | 6.31                    |
| ICAM2       | X_04357                         | 0.33                   | 4.31                | 0.22                    | 2.00                 | 6.31                    |
| FGA         | X_14626                         | 0.36                   | 5.31                | 0.14                    | 0.99                 | 6.30                    |
| CES1        | malate                          | 0.23                   | 2.35                | 0.33                    | 3.95                 | 6.30                    |
| CFD         | four_vinylphenol_sulfate        | 0.32                   | 4.08                | 0.24                    | 2.22                 | 6.30                    |
| COL1A1      | X_11687                         | 0.32                   | 4.28                | 0.23                    | 2.02                 | 6.30                    |
| S100A8      | creatine                        | 0.28                   | 3.21                | 0.29                    | 3.09                 | 6.30                    |
| CD14        | allantoin                       | 0.24                   | 2.51                | 0.32                    | 3.79                 | 6.30                    |
| BAI2        | one_oleoyl_GPC                  | -0.17                  | 1.46                | -0.37                   | 4.84                 | 6.30                    |
| APOE        | taurocholate                    | 0.29                   | 3.45                | 0.28                    | 2.85                 | 6.30                    |
| PLG         | X_12104                         | -0.12                  | 0.81                | -0.39                   | 5.48                 | 6.30                    |
| C4B         | HPLA                            | -0.26                  | 2.84                | -0.31                   | 3.45                 | 6.29                    |
| CST3        | X_11490                         | 0.35                   | 5.07                | 0.16                    | 1.22                 | 6.29                    |
| SERPINF1    | X_11334                         | 0.22                   | 2.18                | 0.34                    | 4.12                 | 6.29                    |
| SERPINF1    | four_acetamidobutanoate         | 0.23                   | 2.39                | 0.33                    | 3.90                 | 6.29                    |
| S100A9      | X_11450                         | 0.26                   | 2.87                | 0.31                    | 3.43                 | 6.29                    |
| LUM         | X_03951                         | 0.27                   | 3.17                | 0.29                    | 3.13                 | 6.29                    |
| SAA1        | epiandrosterone_sulfate         | 0.29                   | 3.50                | 0.27                    | 2.80                 | 6.29                    |
| HPR         | pipecolate                      | -0.20                  | 1.78                | -0.36                   | 4.52                 | 6.29                    |
| C4B         | methionine                      | -0.27                  | 2.98                | -0.30                   | 3.31                 | 6.29                    |
| AMBP        | gamma_glutamylleucine           | 0.31                   | 4.02                | 0.24                    | 2.27                 | 6.29                    |
| DEFA1       | myo_inositol                    | 0.21                   | 2.07                | 0.34                    | 4.21                 | 6.29                    |
| APOL1       | X_04498                         | -0.39                  | 5.95                | -0.07                   | 0.34                 | 6.29                    |
| LGALS3BP    | X_11795                         | 0.26                   | 2.95                | 0.30                    | 3.33                 | 6.29                    |
| HP          | X_12786                         | -0.16                  | 1.28                | -0.38                   | 5.00                 | 6.29                    |
| ORM1        | two_methylbutyroylcarnitine     | 0.28                   | 3.30                | 0.28                    | 2.98                 | 6.29                    |
| FBLN1       | tiglyl_carnitine                | 0.23                   | 2.26                | 0.33                    | 4.02                 | 6.28                    |



| gene symbol | metabolite                  | t0 Pearson Correlation | t0 NegLog10 p-value | t24 Pearson Correlation | t24 NegLog10 p-value | Sum of NegLog10 p-value |
|-------------|-----------------------------|------------------------|---------------------|-------------------------|----------------------|-------------------------|
| SERPINC1    | one_methyladenosine         | -0.25                  | 2.76                | -0.31                   | 3.53                 | 6.28                    |
| PTGDS       | X_11421                     | 0.34                   | 4.65                | 0.20                    | 1.63                 | 6.28                    |
| APOA2       | one_stearoylglycerol        | 0.31                   | 3.87                | 0.25                    | 2.42                 | 6.28                    |
| VSIG4       | octadecanedioate            | 0.22                   | 2.19                | 0.34                    | 4.09                 | 6.28                    |
| APOE        | X_10500                     | 0.25                   | 2.64                | 0.32                    | 3.64                 | 6.28                    |
| SPINK1      | X_12749                     | 0.29                   | 3.54                | 0.27                    | 2.74                 | 6.28                    |
| REG1A       | arabinose                   | 0.24                   | 2.57                | 0.32                    | 3.71                 | 6.28                    |
| HP          | gamma_glutamyltyrosine      | -0.21                  | 2.08                | -0.34                   | 4.20                 | 6.28                    |
| HRG         | X_12855                     | -0.33                  | 4.45                | -0.21                   | 1.83                 | 6.28                    |
| CFI         | X_12850                     | -0.30                  | 3.72                | -0.26                   | 2.56                 | 6.28                    |
| ORM2        | alanine                     | -0.15                  | 1.20                | -0.38                   | 5.08                 | 6.28                    |
| HAUS6       | glycochenodeoxycholate      | -0.10                  | 0.67                | -0.40                   | 5.61                 | 6.28                    |
| DEFA1       | p_cresol_sulfate            | 0.30                   | 3.82                | 0.25                    | 2.45                 | 6.28                    |
| SERPINA1    | one_stearoyl_GPC            | -0.26                  | 2.91                | -0.30                   | 3.37                 | 6.28                    |
| CD14        | X_11826                     | 0.24                   | 2.47                | 0.32                    | 3.80                 | 6.28                    |
| APOH        | threonate                   | 0.29                   | 3.50                | 0.27                    | 2.77                 | 6.28                    |
| F12         | malate                      | 0.20                   | 1.89                | 0.35                    | 4.39                 | 6.27                    |
| RBP4        | X_04498                     | 0.22                   | 2.18                | 0.34                    | 4.10                 | 6.27                    |
| VASN        | phenol_sulfate              | 0.26                   | 2.97                | 0.30                    | 3.31                 | 6.27                    |
| COL1A1      | xylonate                    | 0.34                   | 4.81                | 0.19                    | 1.47                 | 6.27                    |
| B2M         | X_10439                     | 0.36                   | 5.09                | 0.16                    | 1.18                 | 6.27                    |
| CLU         | X_11302                     | -0.27                  | 3.09                | -0.29                   | 3.18                 | 6.27                    |
| LYZ         | X_12099                     | 0.39                   | 6.21                | 0.01                    | 0.06                 | 6.27                    |
| F12         | X_11786                     | 0.31                   | 3.96                | 0.24                    | 2.31                 | 6.27                    |
| APOL1       | X_08402                     | 0.32                   | 4.17                | 0.23                    | 2.10                 | 6.27                    |
| APOA1       | X_12802                     | -0.24                  | 2.47                | -0.32                   | 3.80                 | 6.27                    |
| F12         | glycerate                   | 0.25                   | 2.76                | 0.31                    | 3.51                 | 6.27                    |
| APOA2       | X_11421                     | -0.30                  | 3.82                | -0.25                   | 2.44                 | 6.27                    |
| A1BG        | two_methylbutyroylcarnitine | -0.30                  | 3.70                | -0.26                   | 2.57                 | 6.26                    |
| HRG         | X_04495                     | -0.29                  | 3.53                | -0.27                   | 2.73                 | 6.26                    |
| C4A         | methionine                  | -0.27                  | 3.01                | -0.30                   | 3.26                 | 6.26                    |
| CST3        | one_palmitoleoyl_GPC        | -0.22                  | 2.20                | -0.34                   | 4.07                 | 6.26                    |
| CES1        | serine                      | 0.27                   | 2.98                | 0.30                    | 3.28                 | 6.26                    |
| AHSG        | N_acetylthreonine           | -0.31                  | 3.90                | -0.25                   | 2.36                 | 6.26                    |
| AFM         | citrulline                  | 0.34                   | 4.69                | 0.19                    | 1.57                 | 6.26                    |
| AFM         | X_03951                     | -0.31                  | 4.00                | -0.24                   | 2.26                 | 6.26                    |
| APOC3       | X_11826                     | 0.25                   | 2.61                | 0.32                    | 3.65                 | 6.26                    |
| CLU         | X_11245                     | -0.31                  | 4.05                | -0.24                   | 2.21                 | 6.26                    |
| ORM2        | methionine                  | -0.25                  | 2.63                | -0.32                   | 3.63                 | 6.26                    |
| TTR         | one_stearoylglycerol        | 0.31                   | 3.84                | 0.25                    | 2.42                 | 6.25                    |
| FGA         | malate                      | -0.26                  | 2.98                | -0.30                   | 3.28                 | 6.25                    |
| APOA2       | one_arachidoyl_GPE          | 0.24                   | 2.43                | 0.32                    | 3.82                 | 6.25                    |
| ITIH1       | two_palmitoyl_GPC           | 0.26                   | 2.85                | 0.30                    | 3.40                 | 6.25                    |
| ITIH2       | X_04499                     | -0.29                  | 3.58                | -0.27                   | 2.67                 | 6.25                    |
| ITIH1       | X_12458                     | -0.27                  | 3.11                | -0.29                   | 3.13                 | 6.25                    |
| TF          | X_11429                     | -0.28                  | 3.39                | -0.28                   | 2.86                 | 6.25                    |
| RBP4        | phosphate                   | 0.25                   | 2.60                | 0.32                    | 3.64                 | 6.25                    |
| ADIPOQ      | X_12117                     | 0.31                   | 4.02                | 0.24                    | 2.23                 | 6.25                    |
| ORM1        | X_11838                     | 0.28                   | 3.20                | 0.29                    | 3.04                 | 6.25                    |
| B2M         | one_palmitoyl_GPC           | -0.19                  | 1.76                | -0.35                   | 4.49                 | 6.24                    |
| S100A8      | one_oleoyl_GPC              | -0.18                  | 1.54                | -0.36                   | 4.71                 | 6.24                    |
| APOC3       | quininate                   | 0.19                   | 1.64                | 0.36                    | 4.60                 | 6.24                    |
| DEFA1       | X_05522                     | 0.19                   | 1.71                | 0.36                    | 4.53                 | 6.24                    |
| A1BG        | X_11786                     | 0.34                   | 4.71                | 0.19                    | 1.53                 | 6.24                    |
| ITIH2       | one_palmitoleoyl_GPC        | 0.31                   | 3.89                | 0.25                    | 2.35                 | 6.24                    |
| SAA1        | X_11795                     | -0.26                  | 2.93                | -0.30                   | 3.30                 | 6.24                    |

| gene symbol | metabolite                   | t0 Pearson Correlation | t0 NegLog10 p-value | t24 Pearson Correlation | t24 NegLog10 p-value | Sum of NegLog10 p-value |
|-------------|------------------------------|------------------------|---------------------|-------------------------|----------------------|-------------------------|
| LBP         | X_11470                      | 0.26                   | 2.80                | 0.31                    | 3.44                 | 6.24                    |
| LCP1        | methionine                   | 0.38                   | 5.87                | 0.07                    | 0.37                 | 6.24                    |
| SAA3P       | N2_N2_dimethylguanosine      | 0.30                   | 3.70                | 0.26                    | 2.54                 | 6.24                    |
| ICAM2       | hydroxyproline               | 0.14                   | 1.01                | 0.38                    | 5.22                 | 6.23                    |
| C8G         | X_12695                      | -0.28                  | 3.25                | -0.28                   | 2.98                 | 6.23                    |
| GC          | one_stearoyl_GPC             | 0.21                   | 1.93                | 0.35                    | 4.30                 | 6.23                    |
| ORM2        | X_11244                      | 0.27                   | 3.07                | 0.29                    | 3.16                 | 6.23                    |
| APOH        | X_11334                      | 0.31                   | 3.88                | 0.25                    | 2.35                 | 6.23                    |
| HP          | glutamine                    | -0.24                  | 2.58                | -0.32                   | 3.65                 | 6.23                    |
| S100A9      | SDMA                         | 0.25                   | 2.78                | 0.31                    | 3.46                 | 6.23                    |
| LGALS3BP    | X_10395                      | -0.31                  | 3.94                | -0.24                   | 2.29                 | 6.23                    |
| DEFA1       | X_12458                      | 0.14                   | 1.03                | 0.38                    | 5.20                 | 6.23                    |
| VTN         | X_12742                      | -0.23                  | 2.28                | -0.33                   | 3.95                 | 6.23                    |
| C1QC        | glycocholate                 | 0.31                   | 4.01                | 0.24                    | 2.22                 | 6.23                    |
| APOA4       | N_acetylorithine             | 0.31                   | 3.91                | 0.24                    | 2.32                 | 6.23                    |
| TF          | X_11255                      | 0.28                   | 3.27                | 0.28                    | 2.96                 | 6.23                    |
| CST3        | three_methyl_2_oxovalerate   | -0.22                  | 2.13                | -0.34                   | 4.10                 | 6.23                    |
| GPX3        | one_arachidoyl_GPE           | -0.16                  | 1.35                | -0.37                   | 4.88                 | 6.23                    |
| HRG         | one_arachidoyl_GPC           | 0.24                   | 2.56                | 0.32                    | 3.67                 | 6.22                    |
| COL1A1      | phenylacetylglutamine        | 0.36                   | 5.18                | 0.15                    | 1.04                 | 6.22                    |
| C1QC        | N_acetylthreonine            | 0.26                   | 2.82                | 0.30                    | 3.40                 | 6.22                    |
| SERPIND1    | allantoin                    | -0.26                  | 2.96                | -0.30                   | 3.26                 | 6.22                    |
| GPX3        | X_12794                      | -0.27                  | 3.06                | -0.29                   | 3.17                 | 6.22                    |
| SHBG        | X_11826                      | -0.26                  | 2.89                | -0.30                   | 3.34                 | 6.22                    |
| RBP4        | X_12101                      | 0.22                   | 2.21                | 0.33                    | 4.01                 | 6.22                    |
| S100A8      | isovalerylcarnitine          | 0.31                   | 3.95                | 0.24                    | 2.27                 | 6.22                    |
| APOA1       | one_palmitoleoyl_GPC         | 0.21                   | 1.96                | 0.34                    | 4.26                 | 6.22                    |
| CD14        | taurocholate                 | 0.28                   | 3.24                | 0.28                    | 2.98                 | 6.22                    |
| AMBP        | one_methyladenosine          | 0.38                   | 5.88                | 0.07                    | 0.34                 | 6.22                    |
| APOL1       | X_04595                      | -0.35                  | 5.00                | -0.16                   | 1.22                 | 6.22                    |
| HPR         | gamma_glutamyltyrosine       | -0.19                  | 1.64                | -0.36                   | 4.58                 | 6.22                    |
| FBLN1       | creatinine                   | 0.28                   | 3.34                | 0.28                    | 2.88                 | 6.22                    |
| S100A8      | one_arachidoyl_GPC           | -0.17                  | 1.43                | -0.37                   | 4.79                 | 6.22                    |
| SERPINA3    | X_12802                      | 0.31                   | 3.85                | 0.25                    | 2.37                 | 6.22                    |
| SAA3P       | X_11795                      | -0.27                  | 3.17                | -0.29                   | 3.05                 | 6.22                    |
| CD14        | X_04504                      | 0.26                   | 2.82                | 0.30                    | 3.39                 | 6.22                    |
| CD14        | X_11423                      | 0.23                   | 2.30                | 0.33                    | 3.92                 | 6.22                    |
| MB          | X_11421                      | 0.28                   | 3.22                | 0.28                    | 3.00                 | 6.22                    |
| SERPINA1    | alpha_ketobutyrate           | 0.21                   | 2.04                | 0.34                    | 4.17                 | 6.22                    |
| AGT         | X_12465                      | 0.25                   | 2.64                | 0.31                    | 3.58                 | 6.22                    |
| DEFA1       | X_12117                      | 0.20                   | 1.82                | 0.35                    | 4.39                 | 6.22                    |
| SERPINA6    | tryptophan                   | -0.27                  | 3.13                | -0.29                   | 3.08                 | 6.21                    |
| FCGBP       | X_12101                      | 0.18                   | 1.55                | 0.36                    | 4.66                 | 6.21                    |
| AMBP        | kynurenine                   | 0.30                   | 3.61                | 0.26                    | 2.60                 | 6.21                    |
| GSN         | glutamate                    | 0.30                   | 3.82                | 0.25                    | 2.39                 | 6.21                    |
| SEPP1       | taurochenodeoxycholate       | -0.24                  | 2.45                | -0.32                   | 3.76                 | 6.21                    |
| IGFBP4      | one_five_anhydroglucitol     | -0.39                  | 6.08                | -0.03                   | 0.13                 | 6.21                    |
| VSIG4       | pelargonate                  | -0.26                  | 2.90                | -0.30                   | 3.31                 | 6.21                    |
| VASN        | HPLA                         | 0.16                   | 1.31                | 0.37                    | 4.90                 | 6.21                    |
| CST3        | catechol_sulfate             | 0.29                   | 3.43                | 0.27                    | 2.77                 | 6.21                    |
| SHBG        | androsterone_sulfate         | -0.31                  | 3.99                | -0.24                   | 2.21                 | 6.21                    |
| APOL1       | X_11429                      | -0.37                  | 5.46                | -0.12                   | 0.74                 | 6.20                    |
| B2M         | X_12458                      | 0.34                   | 4.72                | 0.19                    | 1.49                 | 6.20                    |
| COL1A1      | arabitol                     | 0.35                   | 5.00                | 0.16                    | 1.20                 | 6.20                    |
| GPX3        | p_acetamidophenylglucuronide | -0.29                  | 3.59                | -0.26                   | 2.62                 | 6.20                    |
| RNASE1      | four_methyl_2_oxopentanoate  | -0.29                  | 3.54                | -0.27                   | 2.66                 | 6.20                    |

| gene symbol | metabolite                   | t0 Pearson Correlation | t0 NegLog10 p-value | t24 Pearson Correlation | t24 NegLog10 p-value | Sum of NegLog10 p-value |
|-------------|------------------------------|------------------------|---------------------|-------------------------|----------------------|-------------------------|
| LCN2        | one_methyladenosine          | 0.31                   | 4.04                | 0.23                    | 2.16                 | 6.20                    |
| LYZ         | X_12092                      | 0.38                   | 5.72                | 0.09                    | 0.48                 | 6.20                    |
| FCGBP       | SDMA                         | 0.28                   | 3.36                | 0.28                    | 2.84                 | 6.20                    |
| C7          | X_12786                      | 0.32                   | 4.14                | 0.23                    | 2.06                 | 6.20                    |
| FGA         | glutamate                    | -0.29                  | 3.51                | -0.27                   | 2.69                 | 6.20                    |
| LBP         | X_11593                      | 0.30                   | 3.68                | 0.26                    | 2.52                 | 6.20                    |
| RBMX        | X_13553                      | 0.15                   | 1.19                | 0.38                    | 5.00                 | 6.20                    |
| GPX3        | carnitine                    | 0.26                   | 2.91                | 0.30                    | 3.28                 | 6.19                    |
| C7          | four_methyl_2_oxopentanoate  | -0.28                  | 3.32                | -0.28                   | 2.88                 | 6.19                    |
| SHBG        | X_12442                      | 0.37                   | 5.51                | 0.11                    | 0.68                 | 6.19                    |
| SAA1        | one_eicosatrienoyl_GPC       | -0.30                  | 3.66                | -0.26                   | 2.53                 | 6.19                    |
| C1QB        | phenylalanine                | 0.32                   | 4.29                | 0.22                    | 1.90                 | 6.19                    |
| HP          | myristoleate                 | -0.31                  | 3.94                | -0.24                   | 2.25                 | 6.19                    |
| APOA4       | gulono_1_4_lactone           | 0.31                   | 4.05                | 0.23                    | 2.13                 | 6.18                    |
| CD5L        | alpha_hydroxyisovalerate     | 0.28                   | 3.37                | 0.27                    | 2.81                 | 6.18                    |
| SAA3P       | serine                       | -0.23                  | 2.36                | -0.33                   | 3.83                 | 6.18                    |
| FCGBP       | X_03951                      | 0.24                   | 2.59                | 0.31                    | 3.59                 | 6.18                    |
| APOA2       | N_acetylthreonine            | -0.28                  | 3.38                | -0.27                   | 2.80                 | 6.18                    |
| PTGDS       | malate                       | 0.26                   | 2.90                | 0.30                    | 3.28                 | 6.18                    |
| PPBP        | tryptophan                   | 0.09                   | 0.57                | 0.40                    | 5.61                 | 6.18                    |
| GPX3        | one_five_anhydroglucitol     | 0.28                   | 3.29                | 0.28                    | 2.88                 | 6.18                    |
| B2M         | one_stearoyl_GPC             | -0.15                  | 1.22                | -0.37                   | 4.96                 | 6.18                    |
| GC          | octadecanedioate             | -0.25                  | 2.68                | -0.31                   | 3.49                 | 6.18                    |
| APCS        | citrate                      | -0.33                  | 4.55                | -0.20                   | 1.62                 | 6.17                    |
| C8G         | X_04498                      | -0.30                  | 3.72                | -0.25                   | 2.46                 | 6.17                    |
| S100A9      | X_11381                      | 0.36                   | 5.13                | 0.15                    | 1.04                 | 6.17                    |
| S100A8      | X_12465                      | 0.32                   | 4.26                | 0.22                    | 1.91                 | 6.17                    |
| FGB         | mannose                      | 0.25                   | 2.71                | 0.31                    | 3.46                 | 6.17                    |
| LRG1        | serine                       | -0.18                  | 1.55                | -0.36                   | 4.62                 | 6.17                    |
| VWF         | acetylcarnitine              | 0.22                   | 2.20                | 0.33                    | 3.97                 | 6.17                    |
| APOC1       | glutamate                    | 0.35                   | 4.98                | 0.16                    | 1.19                 | 6.17                    |
| S100A8      | one_palmitoleoyl_GPC         | -0.25                  | 2.68                | -0.31                   | 3.49                 | 6.17                    |
| KNG1        | X_11273                      | -0.29                  | 3.40                | -0.27                   | 2.77                 | 6.17                    |
| SHBG        | pyridoxate                   | -0.32                  | 4.07                | -0.23                   | 2.09                 | 6.17                    |
| HP          | HPLA                         | -0.22                  | 2.19                | -0.33                   | 3.97                 | 6.16                    |
| VSIG4       | gamma_glutamylphenylalanine  | 0.28                   | 3.36                | 0.27                    | 2.81                 | 6.16                    |
| S100A8      | X_14663                      | 0.20                   | 1.81                | 0.35                    | 4.35                 | 6.16                    |
| SAA1        | p_acetamidophenylglucuronide | 0.18                   | 1.53                | 0.36                    | 4.63                 | 6.16                    |
| CD14        | X_12117                      | 0.22                   | 2.14                | 0.33                    | 4.02                 | 6.16                    |
| ECM1        | X_11510                      | 0.23                   | 2.35                | 0.32                    | 3.81                 | 6.16                    |
| SAA3P       | X_12742                      | 0.24                   | 2.53                | 0.32                    | 3.62                 | 6.16                    |
| CFD         | glutamate                    | 0.38                   | 5.75                | 0.07                    | 0.40                 | 6.16                    |
| ITIH1       | two_methylbutyrylcarnitine   | -0.20                  | 1.91                | -0.34                   | 4.24                 | 6.16                    |
| C7          | gamma_glutamyltyrosine       | 0.30                   | 3.79                | 0.25                    | 2.36                 | 6.15                    |
| TTR         | one_oleoyl_GPC               | 0.24                   | 2.49                | 0.32                    | 3.66                 | 6.15                    |
| VWF         | uridine                      | -0.27                  | 3.02                | -0.29                   | 3.13                 | 6.15                    |
| RBMX        | betaine                      | 0.37                   | 5.60                | 0.09                    | 0.55                 | 6.15                    |
| APOA4       | hydroxyproline               | 0.18                   | 1.62                | 0.36                    | 4.53                 | 6.15                    |
| S100A9      | erythritol                   | 0.30                   | 3.63                | 0.26                    | 2.52                 | 6.15                    |
| PLG         | X_03951                      | -0.17                  | 1.45                | -0.36                   | 4.69                 | 6.15                    |
| FN1         | two_hydroxypalmitate         | 0.20                   | 1.79                | 0.35                    | 4.36                 | 6.15                    |
| LRG1        | X_11880                      | -0.27                  | 3.07                | -0.29                   | 3.07                 | 6.15                    |
| C1QC        | one_stearoyl_GPC             | -0.15                  | 1.20                | -0.37                   | 4.95                 | 6.14                    |
| LYZ         | X_12749                      | 0.38                   | 5.68                | 0.08                    | 0.46                 | 6.14                    |
| B2M         | X_12850                      | 0.30                   | 3.78                | 0.25                    | 2.37                 | 6.14                    |
| CD14        | X_03951                      | 0.22                   | 2.11                | 0.33                    | 4.03                 | 6.14                    |

| gene symbol | metabolite               | t0 Pearson Correlation | t0 NegLog10 p-value | t24 Pearson Correlation | t24 NegLog10 p-value | Sum of NegLog10 p-value |
|-------------|--------------------------|------------------------|---------------------|-------------------------|----------------------|-------------------------|
| HBA1        | X_14588                  | -0.12                  | 0.82                | -0.39                   | 5.32                 | 6.14                    |
| C4A         | HPLA                     | -0.26                  | 2.81                | -0.30                   | 3.33                 | 6.14                    |
| FN1         | taurochenodeoxycholate   | 0.09                   | 0.57                | 0.40                    | 5.57                 | 6.14                    |
| TIMP1       | heptanoate               | -0.23                  | 2.29                | -0.33                   | 3.85                 | 6.14                    |
| ORM1        | pyridoxate               | 0.23                   | 2.32                | 0.32                    | 3.81                 | 6.13                    |
| VSIG4       | arabinose                | 0.33                   | 4.31                | 0.21                    | 1.83                 | 6.13                    |
| VASN        | X_12850                  | 0.28                   | 3.32                | 0.27                    | 2.81                 | 6.13                    |
| CAT         | lysine                   | 0.14                   | 1.08                | 0.38                    | 5.05                 | 6.13                    |
| LUM         | gamma_glutamyltyrosine   | 0.22                   | 2.18                | 0.33                    | 3.95                 | 6.13                    |
| DEFA1       | X_12095                  | 0.32                   | 4.09                | 0.23                    | 2.04                 | 6.13                    |
| LBP         | X_12990                  | -0.30                  | 3.82                | -0.24                   | 2.31                 | 6.13                    |
| AZGP1       | alpha_hydroxyisovalerate | -0.30                  | 3.76                | -0.25                   | 2.37                 | 6.13                    |
| C3          | X_13553                  | -0.13                  | 0.91                | -0.38                   | 5.22                 | 6.13                    |
| VSIG4       | X_04495                  | 0.34                   | 4.71                | 0.18                    | 1.42                 | 6.13                    |
| ITIH2       | hexanoylcarnitine        | -0.26                  | 2.83                | -0.30                   | 3.30                 | 6.12                    |
| SERPINC1    | beta_hydroxyisovalerate  | -0.29                  | 3.40                | -0.27                   | 2.72                 | 6.12                    |
| C1QC        | X_11538                  | 0.26                   | 2.91                | 0.30                    | 3.21                 | 6.12                    |
| SPINK1      | one_linoleoyl_GPC        | -0.16                  | 1.28                | -0.37                   | 4.84                 | 6.12                    |
| REG1A       | choline                  | 0.16                   | 1.33                | 0.37                    | 4.79                 | 6.12                    |
| SPINK1      | three_indoxyl_sulfate    | 0.19                   | 1.70                | 0.35                    | 4.42                 | 6.12                    |
| TIMP1       | N_acetylthreonine        | 0.19                   | 1.74                | 0.35                    | 4.38                 | 6.12                    |
| CD14        | one_eicosatrienoyl_GPC   | -0.19                  | 1.64                | -0.35                   | 4.48                 | 6.12                    |
| FABP1       | X_12786                  | 0.26                   | 2.88                | 0.30                    | 3.24                 | 6.12                    |
| VSIG4       | X_04595                  | 0.30                   | 3.74                | 0.25                    | 2.38                 | 6.12                    |
| AFP         | phenylalanine            | 0.39                   | 5.96                | 0.03                    | 0.16                 | 6.12                    |
| ABCA13      | one_palmitoyl_GPC        | 0.20                   | 1.81                | 0.35                    | 4.31                 | 6.12                    |
| APOH        | X_12206                  | 0.28                   | 3.35                | 0.27                    | 2.77                 | 6.12                    |
| REG1A       | X_12855                  | 0.24                   | 2.48                | 0.32                    | 3.64                 | 6.12                    |
| GPX3        | erythritol               | -0.30                  | 3.71                | -0.25                   | 2.41                 | 6.11                    |
| PTGDS       | X_02973                  | 0.14                   | 1.09                | 0.38                    | 5.02                 | 6.11                    |
| VSIG4       | X_12786                  | 0.18                   | 1.52                | 0.36                    | 4.59                 | 6.11                    |
| ADIPOQ      | three_indoxyl_sulfate    | 0.35                   | 5.00                | 0.15                    | 1.11                 | 6.11                    |
| SPINK1      | myo_inositol             | 0.29                   | 3.48                | 0.26                    | 2.63                 | 6.11                    |
| C1QB        | octadecanedioate         | 0.30                   | 3.68                | 0.25                    | 2.44                 | 6.11                    |
| C1QB        | X_12644                  | -0.18                  | 1.53                | -0.36                   | 4.58                 | 6.11                    |
| SAA4        | X_11317                  | 0.08                   | 0.52                | 0.40                    | 5.59                 | 6.11                    |
| IGFBP4      | X_12092                  | 0.38                   | 5.92                | 0.04                    | 0.20                 | 6.11                    |
| FN1         | X_11880                  | 0.33                   | 4.45                | 0.20                    | 1.66                 | 6.11                    |
| FCGBP       | X_11593                  | 0.13                   | 0.96                | 0.38                    | 5.15                 | 6.11                    |
| SAA3P       | deoxycarnitine           | 0.36                   | 5.15                | 0.14                    | 0.96                 | 6.11                    |
| ITIH2       | isobutyrylcarnitine      | -0.25                  | 2.63                | -0.31                   | 3.48                 | 6.11                    |
| F2          | gulono_1_4_lactone       | -0.36                  | 5.09                | -0.15                   | 1.02                 | 6.11                    |
| LUM         | N_acetylthreonine        | 0.17                   | 1.40                | 0.36                    | 4.71                 | 6.11                    |
| VTN         | malate                   | -0.20                  | 1.82                | -0.35                   | 4.29                 | 6.11                    |
| LCN2        | isobutyrylcarnitine      | 0.29                   | 3.50                | 0.26                    | 2.60                 | 6.11                    |
| SERPIND1    | hexadecanedioate         | -0.23                  | 2.29                | -0.32                   | 3.81                 | 6.10                    |
| APOA4       | sucrose                  | 0.28                   | 3.37                | 0.27                    | 2.73                 | 6.10                    |
| SHBG        | threitol                 | -0.32                  | 4.30                | -0.21                   | 1.80                 | 6.10                    |
| CD14        | X_04507                  | 0.24                   | 2.44                | 0.32                    | 3.66                 | 6.10                    |
| MB          | one_arachidoyl_GPE       | -0.12                  | 0.86                | -0.38                   | 5.24                 | 6.10                    |
| APOA4       | X_12742                  | 0.30                   | 3.75                | 0.25                    | 2.35                 | 6.10                    |
| PIGR        | seven_HOCA               | 0.09                   | 0.54                | 0.40                    | 5.56                 | 6.10                    |
| LBP         | hexanoylcarnitine        | 0.26                   | 2.94                | 0.29                    | 3.16                 | 6.10                    |
| C4B         | phenylalanine            | -0.32                  | 4.20                | -0.22                   | 1.90                 | 6.10                    |
| C1QC        | X_12095                  | 0.22                   | 2.21                | 0.33                    | 3.89                 | 6.10                    |
| AMBP        | X_11787                  | -0.25                  | 2.69                | -0.31                   | 3.41                 | 6.10                    |

| gene symbol | metabolite                       | t0 Pearson Correlation | t0 NegLog10 p-value | t24 Pearson Correlation | t24 NegLog10 p-value | Sum of NegLog10 p-value |
|-------------|----------------------------------|------------------------|---------------------|-------------------------|----------------------|-------------------------|
| ABCA13      | bilirubin                        | 0.26                   | 2.80                | 0.30                    | 3.29                 | 6.10                    |
| ORM1        | bilirubin                        | -0.33                  | 4.53                | -0.19                   | 1.56                 | 6.09                    |
| C1QC        | one_eicosatrienoyl_GPC           | -0.19                  | 1.64                | -0.35                   | 4.45                 | 6.09                    |
| VTN         | X_11437                          | -0.24                  | 2.56                | -0.31                   | 3.53                 | 6.09                    |
| ORM2        | X_12206                          | 0.18                   | 1.56                | 0.36                    | 4.53                 | 6.09                    |
| VTN         | X_12850                          | -0.27                  | 3.13                | -0.28                   | 2.96                 | 6.09                    |
| CD14        | glycocholate                     | 0.29                   | 3.54                | 0.26                    | 2.56                 | 6.09                    |
| B2M         | pelargonate                      | -0.23                  | 2.29                | -0.32                   | 3.80                 | 6.09                    |
| B2M         | two_methoxyacetaminophen_sulfate | 0.14                   | 1.03                | 0.38                    | 5.06                 | 6.09                    |
| ABCA13      | glutamate                        | 0.26                   | 2.84                | 0.30                    | 3.25                 | 6.09                    |
| DEFA1       | X_03951                          | 0.21                   | 2.00                | 0.34                    | 4.09                 | 6.09                    |
| APOH        | X_06126                          | 0.33                   | 4.46                | 0.20                    | 1.63                 | 6.09                    |
| SEPP1       | one_stearoyl_GPC                 | 0.35                   | 5.01                | 0.15                    | 1.07                 | 6.08                    |
| SERPIND1    | X_04499                          | -0.30                  | 3.71                | -0.25                   | 2.38                 | 6.08                    |
| LGALS3BP    | bilirubin                        | 0.24                   | 2.55                | 0.31                    | 3.53                 | 6.08                    |
| SPINK1      | X_12688                          | 0.28                   | 3.22                | 0.28                    | 2.86                 | 6.08                    |
| HP          | proline                          | -0.18                  | 1.61                | -0.35                   | 4.47                 | 6.08                    |
| ORM1        | X_12695                          | 0.24                   | 2.54                | 0.31                    | 3.54                 | 6.08                    |
| ABCA13      | one_palmitoleoyl_GPC             | 0.26                   | 2.96                | 0.29                    | 3.12                 | 6.08                    |
| KNG1        | beta_hydroxyisovalerate          | -0.29                  | 3.45                | -0.26                   | 2.63                 | 6.08                    |
| COL11A2     | X_11786                          | 0.17                   | 1.39                | 0.36                    | 4.69                 | 6.08                    |
| C1QA        | pseudouridine                    | 0.29                   | 3.52                | 0.26                    | 2.56                 | 6.08                    |
| TIMP1       | two_methylbutyroylcarnitine      | 0.24                   | 2.45                | 0.32                    | 3.63                 | 6.08                    |
| S100A9      | one_eicosatrienoyl_GPC           | -0.13                  | 0.97                | -0.38                   | 5.10                 | 6.08                    |
| SERPINF1    | X_03056                          | 0.27                   | 3.13                | 0.28                    | 2.95                 | 6.07                    |
| SAA1        | X_12644                          | -0.28                  | 3.32                | -0.27                   | 2.76                 | 6.07                    |
| CD14        | X_11429                          | 0.23                   | 2.34                | 0.32                    | 3.73                 | 6.07                    |
| AGT         | tryptophan                       | -0.24                  | 2.46                | -0.32                   | 3.61                 | 6.07                    |
| CST3        | pelargonate                      | -0.24                  | 2.52                | -0.31                   | 3.55                 | 6.07                    |
| SPINK1      | X_12217                          | 0.25                   | 2.68                | 0.30                    | 3.39                 | 6.07                    |
| LUM         | X_12117                          | 0.28                   | 3.24                | 0.28                    | 2.83                 | 6.07                    |
| APCS        | octadecanedioate                 | -0.34                  | 4.57                | -0.19                   | 1.50                 | 6.07                    |
| ITIH2       | one_arachidoyl_GPE               | 0.32                   | 4.30                | 0.21                    | 1.77                 | 6.07                    |
| AFM         | urea                             | -0.36                  | 5.21                | -0.13                   | 0.86                 | 6.07                    |
| CES1        | propionylcarnitine               | 0.32                   | 4.21                | 0.21                    | 1.86                 | 6.07                    |
| A1BG        | X_12688                          | -0.30                  | 3.65                | -0.25                   | 2.42                 | 6.07                    |
| ECM1        | glutamine                        | 0.26                   | 2.90                | 0.29                    | 3.17                 | 6.07                    |
| CRP         | X_11273                          | 0.32                   | 4.24                | 0.21                    | 1.83                 | 6.07                    |
| HPR         | X_12786                          | -0.14                  | 1.06                | -0.38                   | 5.00                 | 6.07                    |
| GSN         | citrulline                       | 0.29                   | 3.39                | 0.27                    | 2.67                 | 6.06                    |
| KLKB1       | HPLA                             | -0.34                  | 4.64                | -0.18                   | 1.42                 | 6.06                    |
| COL1A1      | four_acetamidobutanoate          | 0.33                   | 4.45                | 0.20                    | 1.61                 | 6.06                    |
| ORM1        | proline                          | -0.29                  | 3.59                | -0.25                   | 2.47                 | 6.06                    |
| APOC3       | glutamylvaline                   | 0.35                   | 4.86                | 0.16                    | 1.20                 | 6.06                    |
| LGALS3BP    | malate                           | 0.29                   | 3.58                | 0.26                    | 2.48                 | 6.06                    |
| GC          | two_methylbutyroylcarnitine      | -0.31                  | 4.00                | -0.23                   | 2.06                 | 6.06                    |
| VSIG4       | one_palmitoyl_GPC                | -0.20                  | 1.81                | -0.34                   | 4.25                 | 6.06                    |
| CFHR2       | mannose                          | 0.27                   | 3.07                | 0.28                    | 2.99                 | 6.06                    |
| APOA4       | X_11826                          | 0.30                   | 3.64                | 0.25                    | 2.41                 | 6.06                    |
| FCGBP       | X_12458                          | 0.33                   | 4.53                | 0.19                    | 1.52                 | 6.05                    |
| C7          | tyrosine                         | 0.31                   | 4.04                | 0.23                    | 2.02                 | 6.05                    |
| APOA2       | tiglyl_carnitine                 | -0.30                  | 3.71                | -0.25                   | 2.35                 | 6.05                    |
| SAA3P       | X_13429                          | 0.25                   | 2.62                | 0.31                    | 3.43                 | 6.05                    |
| HP          | citrulline                       | -0.18                  | 1.55                | -0.36                   | 4.50                 | 6.05                    |
| CES1        | X_12850                          | 0.16                   | 1.36                | 0.36                    | 4.69                 | 6.05                    |

| gene symbol | metabolite                  | t0 Pearson Correlation | t0 NegLog10 p-value | t24 Pearson Correlation | t24 NegLog10 p-value | Sum of NegLog10 p-value |
|-------------|-----------------------------|------------------------|---------------------|-------------------------|----------------------|-------------------------|
| GPX3        | alpha_ketobutyrate          | 0.28                   | 3.23                | 0.27                    | 2.82                 | 6.05                    |
| ITIH3       | tyrosine                    | -0.12                  | 0.89                | -0.38                   | 5.16                 | 6.05                    |
| CST3        | one_oleoyl_GPC              | -0.23                  | 2.39                | -0.32                   | 3.66                 | 6.05                    |
| LRG1        | mannose                     | 0.22                   | 2.20                | 0.33                    | 3.85                 | 6.05                    |
| GPX3        | N2_N2_dimethylguanosine     | -0.29                  | 3.58                | -0.25                   | 2.46                 | 6.05                    |
| SAA3P       | X_12117                     | 0.31                   | 3.94                | 0.23                    | 2.10                 | 6.04                    |
| C1QB        | gamma_glutamylphenylalanine | 0.36                   | 5.17                | 0.13                    | 0.88                 | 6.04                    |
| SAA3P       | X_11826                     | 0.28                   | 3.20                | 0.28                    | 2.85                 | 6.04                    |
| APOE        | HPLA                        | 0.29                   | 3.43                | 0.26                    | 2.61                 | 6.04                    |
| SHBG        | hippurate                   | -0.23                  | 2.25                | -0.32                   | 3.79                 | 6.04                    |
| LYZ         | X_10483                     | 0.38                   | 5.80                | 0.05                    | 0.24                 | 6.04                    |
| SERPINF1    | N_acetylthreonine           | 0.25                   | 2.71                | 0.30                    | 3.33                 | 6.04                    |
| SERPINF1    | X_11687                     | 0.25                   | 2.69                | 0.30                    | 3.35                 | 6.04                    |
| FN1         | pipecolate                  | 0.11                   | 0.77                | 0.39                    | 5.27                 | 6.04                    |
| LCP1        | acetylcarnitine             | 0.29                   | 3.60                | 0.25                    | 2.44                 | 6.04                    |
| SERPINF1    | X_12405                     | 0.11                   | 0.77                | 0.39                    | 5.27                 | 6.04                    |
| SERPIND1    | N_acetylalanine             | -0.27                  | 3.00                | -0.29                   | 3.04                 | 6.04                    |
| APOH        | gluconate                   | 0.35                   | 4.88                | 0.16                    | 1.16                 | 6.04                    |
| PLG         | one_methylimidazoleacetate  | -0.09                  | 0.53                | -0.39                   | 5.51                 | 6.04                    |
| LUM         | X_12206                     | 0.32                   | 4.23                | 0.21                    | 1.81                 | 6.04                    |
| CES1        | seven_HOCA                  | 0.11                   | 0.73                | 0.39                    | 5.31                 | 6.04                    |
| COL1A1      | hydroxyproline              | 0.26                   | 2.87                | 0.29                    | 3.17                 | 6.04                    |
| PON1        | alpha_hydroxyisovalerate    | -0.29                  | 3.59                | -0.25                   | 2.45                 | 6.03                    |
| AFM         | X_12100                     | -0.29                  | 3.56                | -0.25                   | 2.47                 | 6.03                    |
| CFD         | malate                      | 0.33                   | 4.51                | 0.19                    | 1.52                 | 6.03                    |
| GSN         | creatine                    | -0.26                  | 2.81                | -0.30                   | 3.22                 | 6.03                    |
| RBP4        | one_methylimidazoleacetate  | 0.22                   | 2.24                | 0.32                    | 3.79                 | 6.03                    |
| LBP         | X_11838                     | 0.22                   | 2.13                | 0.33                    | 3.89                 | 6.03                    |

**Table S11.** Protein-metabolite correlations of potential novel enzymatic pathways. Pearson Correlation of  $t_0$  metabolites with  $t_0$  proteins

| Variable | With                        | Pearson Correlation | -LOG10 pValue |
|----------|-----------------------------|---------------------|---------------|
| ACSM6    | 1- arachidoyl GPC           | -0.31               | 3.95          |
| ACSM6    | 1- arachidoyl GPE           | -0.35               | 4.82          |
| ACSM6    | 1- eicosatrienoyl GPC       | -0.33               | 4.55          |
| ACSM6    | 1- linoleoyl GPC            | -0.38               | 5.83          |
| ACSM6    | 1- oleoyl GPC               | -0.38               | 5.78          |
| ACSM6    | 1- oleoyl GPE               | -0.22               | 2.25          |
| ACSM6    | 1- palmitoleoyl GPC         | -0.47               | 8.74          |
| ACSM6    | 1- palmitoyl GPC            | -0.44               | 7.83          |
| ACSM6    | 1- stearoyl GPC             | -0.44               | 7.81          |
| ACSM6    | 2-methylbutyrylcarnitine    | 0.32                | 4.17          |
| ACSM6    | 2-palmitoyl GPC             | -0.36               | 5.17          |
| ACSM6    | 4-cis-decenoylcarnitine     | 0.22                | 2.24          |
| ACSM6    | acetylcarnitine             | 0.18                | 1.61          |
| ACSM6    | arachidonate                | -0.22               | 2.21          |
| ACSM6    | butyrylcarnitine            | 0.31                | 3.99          |
| ACSM6    | decanoylcarnitine           | 0.17                | 1.37          |
| ACSM6    | deoxycarnitine              | 0.25                | 2.62          |
| ACSM6    | eicostrienoate              | -0.25               | 2.62          |
| ACSM6    | hydroxyisovaleroylcarnitine | 0.28                | 3.34          |
| ACSM6    | isobutyrylcarnitine         | 0.28                | 3.26          |
| ACSM6    | isovalerylcarnitine         | 0.18                | 1.50          |
| ACSM6    | octanoylcarnitine           | 0.23                | 2.32          |
| ACSM6    | palmitoylcarnitine          | -0.15               | 1.15          |
| ACSM6    | tiglyl carnitine            | 0.32                | 4.24          |
| FABP4    | 10-heptadecenoate           | 0.18                | 1.58          |
| FABP4    | 2-hydroxypalmitate          | 0.33                | 4.50          |
| FABP4    | 4-cis-decenoylcarnitine     | 0.20                | 1.83          |
| FABP4    | acetylcarnitine             | 0.23                | 2.33          |
| FABP4    | decanoylcarnitine           | 0.25                | 2.72          |
| FABP4    | docosahexaenoate            | 0.19                | 1.69          |
| FABP4    | docosapentaenoate           | 0.19                | 1.64          |
| FABP4    | eicosenoate                 | 0.19                | 1.72          |
| FABP4    | hexadecanedioate            | 0.32                | 4.28          |
| FABP4    | hexanoylcarnitine           | 0.25                | 2.76          |
| FABP4    | laurylcarnitine             | 0.32                | 4.15          |
| FABP4    | myristate                   | 0.19                | 1.64          |
| FABP4    | myristoleate                | 0.26                | 2.89          |
| FABP4    | octadecanedioate            | 0.42                | 7.06          |
| FABP4    | octanoylcarnitine           | 0.22                | 2.10          |
| FABP4    | palmitoleate                | 0.21                | 2.00          |
| FABP4    | palmitoylcarnitine          | 0.35                | 4.86          |
| FABP4    | propionylcarnitine          | 0.27                | 3.11          |
| SDHD     | acetylcarnitine             | 0.22                | 2.14          |
| SDHD     | alpha-ketoglutarate         | 0.14                | 1.01          |
| SDHD     | citrate                     | 0.28                | 3.38          |
| SDHD     | decanoylcarnitine           | 0.17                | 1.49          |
| SDHD     | lactate                     | 0.24                | 2.46          |
| SDHD     | malate                      | 0.21                | 1.99          |
| SDHD     | oxaloacetate                | 0.19                | 1.67          |
| SDHD     | pyruvate                    | 0.19                | 1.74          |
